# Supplementary material for: Diagnosis and treatment for hyperuricemia and gout: a systematic review of clinical practice guidelines and consensus statements
Source: PubMed Central journal article supplement — BMJ Open. 2019 Aug 24;9(8):e026677. doi: 10.1136/bmjopen-2018-026677 (PMC6720466; doi:10.1136/bmjopen-2018-026677), 2019-08-24
Supplement: bmjopen-2018-026677.draft_revisions.pdf [file bmjopen-2018-026677.draft_revisions.pdf]

# BMJ Open

BMJ Open is committed to open peer review. As part of this commitment we make the peer review history of every article we publish publicly available.

When an article is published we post the peer reviewers' comments and the authors' responses online. We also post the versions of the paper that were used during peer review. These are the versions that the peer review comments apply to.

The versions of the paper that follow are the versions that were submitted during the peer review process. They are not the versions of record or the final published versions. They should not be cited or distributed as the published version of this manuscript.

BMJ Open is an open access journal and the full, final, typeset and author-corrected version of record of the manuscript is available on our site with no access controls, subscription charges or pay-per-view fees (<http://bmjopen.bmj.com>).

If you have any questions on BMJ Open's open peer review process please email [info.bmjopen@bmj.com](mailto:info.bmjopen@bmj.com)

# BMJ Open

## Diagnosis and treatment for hyperuricemia and gout: a systematic review of clinical practice guidelines and consensus statements

|                               |                                                                                                                                                                                                                                                                                                                                                                                                                                                                                                                                                                                                                                                                                                                                                                                                                                                                                                                                                                                                                                                                                                                                                                                                                                                                                                                                                                                                                                                                                                                                                                   |
|-------------------------------|-------------------------------------------------------------------------------------------------------------------------------------------------------------------------------------------------------------------------------------------------------------------------------------------------------------------------------------------------------------------------------------------------------------------------------------------------------------------------------------------------------------------------------------------------------------------------------------------------------------------------------------------------------------------------------------------------------------------------------------------------------------------------------------------------------------------------------------------------------------------------------------------------------------------------------------------------------------------------------------------------------------------------------------------------------------------------------------------------------------------------------------------------------------------------------------------------------------------------------------------------------------------------------------------------------------------------------------------------------------------------------------------------------------------------------------------------------------------------------------------------------------------------------------------------------------------|
| Journal:                      | <i>BMJ Open</i>                                                                                                                                                                                                                                                                                                                                                                                                                                                                                                                                                                                                                                                                                                                                                                                                                                                                                                                                                                                                                                                                                                                                                                                                                                                                                                                                                                                                                                                                                                                                                   |
| Manuscript ID                 | bmjopen-2018-026677                                                                                                                                                                                                                                                                                                                                                                                                                                                                                                                                                                                                                                                                                                                                                                                                                                                                                                                                                                                                                                                                                                                                                                                                                                                                                                                                                                                                                                                                                                                                               |
| Article Type:                 | Research                                                                                                                                                                                                                                                                                                                                                                                                                                                                                                                                                                                                                                                                                                                                                                                                                                                                                                                                                                                                                                                                                                                                                                                                                                                                                                                                                                                                                                                                                                                                                          |
| Date Submitted by the Author: | 13-Sep-2018                                                                                                                                                                                                                                                                                                                                                                                                                                                                                                                                                                                                                                                                                                                                                                                                                                                                                                                                                                                                                                                                                                                                                                                                                                                                                                                                                                                                                                                                                                                                                       |
| Complete List of Authors:     | <p>Li, Qianrui; Sichuan University West China Hospital, Department of Endocrinology and Metabolism</p> <p>Li, Xiaodan; Sichuan University West China Hospital, Department of Gastroenterology</p> <p>Wang, Jing; Sichuan University West China Hospital, Department of Oto-Rhino-Laryngology</p> <p>Liu, Hongdie; Sichuan University West China Hospital, Department of Endocrinology and Metabolism</p> <p>Kwong, Joey; Prince of Wales Hospital, The Chinese University of Hong Kong, Jockey Club School of Public Health and Primary Care</p> <p>Chen, Hao; Nanjing University of Chinese Medicine, The second clinical college</p> <p>Li, Ling; West China Hospital, Sichuan University, Chinese Evidence-based Medicine Center</p> <p>Chung, Sheng-Chia; The Farr Institute of Health Informatics Research and Institute of Health Informatics, University College London</p> <p>Shah, Anoop; University College London, Farr Institute of Health Informatics Research</p> <p>Chen, Yaolong; School of Basic Medical Sciences, Lanzhou University, Evidence-Based Medicine Center</p> <p>An, Zhenmei; Sichuan University West China Hospital, Department of Endocrinology and Metabolism</p> <p>Sun, Xin; West China Hospital, Sichuan University, Chinese Evidence-based Medicine Center</p> <p>Hemingway, Harry; UCL, Epidemiology and Public Health</p> <p>Tian, Hao-Ming; Department of Endocrinology, West China Hospital, Sichuan University</p> <p>Li, Sheyu; Department of Endocrinology and Metabolism, West China Hospital, Sichuan University</p> |
| Keywords:                     | Clinical practice guideline, Hyperuricemia, Gout, Systematic review                                                                                                                                                                                                                                                                                                                                                                                                                                                                                                                                                                                                                                                                                                                                                                                                                                                                                                                                                                                                                                                                                                                                                                                                                                                                                                                                                                                                                                                                                               |

SCHOLARONE™  
Manuscripts

1  
2  
3 **Diagnosis and treatment for hyperuricemia and gout: a systematic**  
4 **review of clinical practice guidelines and consensus statements**  
5  
6  
7

8 **Running title:** AGREE II assessment for hyperuricemia and gout guidelines  
9  
10

11  
12 Qianrui Li<sup>1,2#</sup>, Xiaodan Li<sup>3#</sup>, Jing Wang<sup>4</sup>, Hongdie Liu<sup>1</sup>, Joey Sum-Wing Kwong<sup>5</sup>,  
13 Hao Chen<sup>6</sup>, Ling Li<sup>7</sup>, Sheng-Chia Chung<sup>2</sup>, Anoop Dinesh Shah<sup>2,8,9,10</sup>, Yaolong  
14 Chen<sup>11</sup>, Zhenmei An<sup>1</sup>, Xin Sun<sup>7</sup>, Harry Hemingway<sup>2,9,10</sup>, Haoming Tian<sup>1\*</sup>,  
15 Sheyu Li<sup>1,12\*</sup>  
16  
17  
18  
19  
20

21 1 Department of Endocrinology and Metabolism, West China Hospital, Sichuan  
22 University, Chengdu, 610041, China  
23

24 2 Institute of Health Informatics, University College London, 222 Euston Road,  
25 London NW1 2DA  
26

27 3 Department of Gastroenterology, West China Hospital, Sichuan University,  
28 Chengdu, 610041, China  
29

30 4 Department of Oto-Rhino-Laryngology, West China Hospital, Sichuan  
31 University, Chengdu, 610041, China  
32

33 5 Jockey Club School of Public Health and Primary Care, Prince of Wales  
34 Hospital, The Chinese University of Hong Kong, Hong Kong, China  
35

36 6 The Second Clinical College, Nanjing University of Chinese Medicine,  
37 Nanjing, 210046, China  
38

39 7 Chinese Evidence-based Medicine Center, West China Hospital, Sichuan  
40 University, Chengdu, 610041, China  
41

42 8 University College London Hospitals NHS Trust, London, United Kingdom  
43

44 9 Health Data Research UK London, University College London, 222 Euston  
45 Road, London NW1 2DA, United Kingdom  
46

47 10 The National Institute for Health Research University College London  
48 Hospitals Biomedical Research Centre, University College London, 222  
49 Euston Road, London NW1 2DA, UK  
50  
51  
52  
53  
54  
55  
56  
57  
58  
59  
60

1  
2  
3 11 Evidence-Based Medicine Center, School of Basic Medical Sciences,  
4 Lanzhou University, Lanzhou, China

5  
6  
7 12 Division of Population Health and Genomics, Ninewells Hospital and  
8 School of Medicine, University of Dundee, Dundee, Angus, DD1 9SY, Scotland,  
9 United Kingdom  
10  
11  
12  
13

14 # These two authors contributed equally to this work.

15  
16 \* Corresponding authors: Dr. Sheyu Li (lisheyu@gmail.com or  
17 lisheyu@scu.edu.cn or s.r.li@dundee.ac.uk) and Professor Haoming Tian  
18 (hmtian999@126.com), Department of Endocrinology and Metabolism, West  
19 China Hospital, Sichuan University, 37# Guoxue Road, Chengdu, 610041,  
20 Sichuan, China.  
21  
22  
23  
24  
25  
26  
27  
28  
29  
30  
31  
32  
33  
34  
35  
36  
37  
38  
39  
40  
41  
42  
43  
44  
45  
46  
47  
48  
49  
50  
51  
52  
53  
54  
55  
56  
57  
58  
59  
60

## ABSTRACT

### Objectives

Despite the publication of hundreds of trials on gout and hyperuricemia, management of these conditions remains suboptimal. We aimed to assess the quality and consistency of guidance documents for gout and hyperuricemia.

### Design

Systematic review.

### Interventions

We searched PubMed and EMBASE (in October 2016), ten guideline databases, and Google and Google scholar (in July 2017) for the latest version of international and national/regional clinical practice guidelines and consensus statements for the diagnosis and/or treatment of hyperuricemia and gout, published in English or Chinese. The quality of guidance documents was assessed using the Appraisal of Guidelines for Research and Evaluation (AGREE) II instrument. Recommendations were tabulated and visualized in a coloured grid.

### Results

Twenty-four guidance documents (16 clinical practice guidelines and 8 consensus statements) published between 2003 and 2017 were included. Included documents performed well in the domains of scope and purpose (median 85.4%, range 66.7%-100.0%) and clarity of presentation (median 81.3%, range 48.6%-98.6%), but unsatisfied in applicability (median 9.9%, range 0.0%-66.7%) and editorial independence (median 28.1%, range 0.0%-83.3%). The 2017 British Society of Rheumatology guideline received the highest scores. Recommendations were concordant on the target serum uric acid level for long-term control, on some indications for urate-lowering therapy, and on the first-line drugs for urate-lowering therapy and for acute attack. Substantially inconsistent recommendations were provided for many items, especially for the timing of initiation of urate-lowering therapy and for treatment for asymptomatic hyperuricemia.

## Conclusions

Methodological quality needs improvement in guidance documents on gout and hyperuricemia. Evidence for certain clinical questions is lacking, despite numerous trials in this field. Promoting standard guidance development methods and synthesizing high-quality clinical evidence are potential approaches to help reduce inconsistency in recommendations.

## Study registration

PROSPERO (CRD42016046104).

## Keywords

Clinical practice guideline, Hyperuricemia, Gout, Systematic review

## STRENGTHS AND LIMITATIONS OF THIS STUDY

1. The first systematic review to assess the quality of clinical practice guidelines and consensus statements on the diagnosis and treatment for hyperuricemia and gout.
2. The first systematic review to summarise recommendations for best practice in hyperuricemia and gout.
3. The Appraisal of Guidelines for Research and Evaluation (AGREE) II instrument was used for evaluation, which was an international, validated, and rigorously developed tool.
4. Only guidance documents in English and Chinese were included.

## BACKGROUND

Gout is an inflammatory arthritis occurring in response to monosodium urate crystals formation, a common and necessary pathogenic factor of which is hyperuricemia. The prevalence of gout and hyperuricemia [1-4], as well as their disease burden [5, 6], are rising globally. More than six hundred clinical studies [7], including observational studies, randomised clinical trials, and mendelian randomization studies, have been published to date. However, the quality of care for gout and hyperuricemia remains suboptimal. The goal of treatment is to reduce the body's total uric acid pool [8, 9] and consequently to minimize the risk of acute flares, arthropathy, nephrolithiasis, and other complications [7, 10, 11]. A study in the United States found that only 22% patients with gout received therapy adhering to all quality indicators [12] and a nationwide population study in the United Kingdom reported that only 48% of prevalent patients received proper consultation and only 27% of incident patients were provided with urate-lowering therapy (ULT) within one year of diagnosis [6].

High-quality guidance documents are important for improving the quality of diagnosis and management of gout and hyperuricemia at individual, community, and national levels [13]. Current guidance documents for hyperuricemia and gout have been developed by rheumatology, endocrinology, and cardiology groups, at regional, national or international levels. Among these documents, the American College of Rheumatology (ACR) guidelines [14, 15], updated in 2012, and the European League Against Rheumatism (EULAR) guidelines [16-18], updated in 2016, have the most substantial global influence. The most recent documents (released in 2017) are two national guidelines, from the American College of Physicians (ACP) [19, 20] and from the British Society of Rheumatology (BSR) [21], and one consensus statement, from the Chinese multi-disciplinary expert task force on hyperuricemia and its related diseases [22].



1  
2  
3  
4  
5 However, current guidance documents on gout and hyperuricemia provide  
6 inconsistent recommendations, even those released by highly respected  
7 professional organizations, such as the ACP and the ACR [23]. Some distinct  
8 differences lie in key aspects for patient care, such as the pharmacological  
9 treatment for asymptomatic hyperuricemic patients, the timing of initiation of  
10 ULT in patients with gout flare [24], and indications for ULT [25]. These  
11 discrepancies may result from ethnic and social differences, but can be  
12 consequences of inconsistent guideline development [23]. Low-quality  
13 guidance documents put individual patients and communities at risk, and  
14 impede clinicians' application of the guidance in daily practice [26]. Hence, we  
15 conducted this study to systematically evaluate the quality of guidance  
16 documents on gout and hyperuricemia and to compare all key  
17 recommendations from different documents.  
18  
19  
20  
21  
22  
23  
24  
25  
26  
27  
28  
29

## 30 **METHODS**

31 Detailed methods of the study have been published previously [27] and this  
32 study was registered with PROSPERO (registration number:  
33 CRD42016046104).  
34  
35  
36  
37  
38  
39

### 40 **Literature search and selection criteria**

41 We systematically searched PubMed and EMBASE from inception to 27  
42 October 2016 using a comprehensive search strategy (Supplementary Table 1  
43 and Supplementary Table 2) to identify guidance documents pertaining to the  
44 diagnosis and treatment of hyperuricemia and gout. We searched guideline  
45 databases from inception to 24 July 2017 using search strategies tailored to  
46 different databases (Supplementary Table 3). We also searched Google and  
47 Google scholar in July 2017 for potentially eligible guidelines and consensus  
48 statements that were not indexed in the aforementioned databases.  
49  
50  
51  
52  
53  
54  
55  
56  
57  
58  
59  
60

1  
2  
3 We included the latest versions of all international and national/regional clinical  
4 practice guidelines and consensus statements for the diagnosis and/or  
5 treatment of hyperuricemia and gout, published in English or Chinese. Two  
6 reviewers (Q.L., X.L.) independently screened all searched papers. Reasons  
7 for exclusion were provided for documents excluded during the full-text review  
8 (Supplementary Table 4). Disagreements were resolved through discussion  
9 with a third reviewer (S.L.).  
10  
11  
12  
13  
14  
15

### 16 17 18 **Data extraction**

19 We extracted the following data from each included document: document  
20 characteristics (e.g., year of publication, funding body, evidence base),  
21 recommendations for diagnosis and monitoring of hyperuricemia and gout, and  
22 recommendations for management. Data were extracted by one investigator  
23 (Q.L.) and were checked by a second investigator (X.L.).  
24  
25  
26  
27  
28  
29

### 30 31 **Appraisal of guidance documents**

32 All included documents were assessed by four reviewers (Q.L., X.L., J.W., and  
33 H.L.) independently using the Appraisal of Guidelines for Research and  
34 Evaluation (AGREE) II instrument [28]. AGREE II is an internationally  
35 developed and validated tool to evaluate the quality of clinical practice  
36 guidelines [29-31] and consensus statements [32, 33].  
37  
38  
39  
40  
41  
42

43 All reviewers completed the online training tutorial [34] before the  
44 commencement of appraisal to ensure standardization. We adapted detailed  
45 instructions for scoring from the AGREE II User's Manual [28] and provided  
46 objective scoring criteria for each item (Supplementary File 1). We selected  
47 four guidance documents for pilot scoring, during which our objective scoring  
48 criteria were discussed and clarified. A meeting was held among reviewers  
49 after the appraisal and every item with scores differed more than one point was  
50 discussed. Reviewers were given the opportunity to revise their scores or to  
51  
52  
53  
54  
55  
56  
57  
58  
59  
60

1  
2  
3 keep the original scores after the meeting. We recorded all original scores,  
4 revised scores, and reasons for modifying scores. We calculated the inter-rater  
5 reliability on the AGREE II using the intra-class correlation coefficient (ICC) via  
6 IBM SPSS (IBM Co., Armonk, New York, USA) when the entire scoring  
7 process was completed. An ICC  $\geq 0.7$  was considered acceptable [35].  
8  
9  
10  
11  
12  
13

### 14 **Recommendation synthesis**

15  
16 We manually extracted descriptive data from all included guidance documents  
17 and tabulated them into the following tables to summarize recommendations:  
18 the diagnosis of gout and hyperuricemia, the treatment of hyperuricemia, the  
19 treatment of acute gout, and the treatment of tophi. Data were extracted by  
20 one investigator (Q.L.) and were checked by a second investigator (X.L.). We  
21 plot the summarized recommendations in a five-colour grid to illustrate  
22 inconsistencies. The most frequently stated content was used as the reference  
23 content. Cells of guidance documents providing consistent recommendations  
24 were coloured in green, while cells of those providing partially consistent  
25 recommendations, which was defined as recommendations including but not  
26 the same as reference contents, were coloured in blue, and of inconsistent  
27 recommendations in red. Where recommendations were not given and were  
28 not applicable, the cell was coloured in yellow and in grey, respectively.  
29  
30  
31  
32  
33  
34  
35  
36  
37  
38  
39  
40

## 41 **RESULTS**

### 42 **Search results**

43  
44 Overall, we identified 5811 items across the academic databases, guideline  
45 databases, Google, and Google Scholar. After applying the inclusion and  
46 exclusion criteria, 24 guidance documents from 26 papers [14-22, 36-52] were  
47 included in the final appraisal and recommendation synthesis (Figure 1).  
48  
49 Studies excluded after full-text review and reasons for exclusion were provided  
50 as Supplementary Table 4.  
51  
52  
53  
54  
55  
56  
57  
58  
59  
60

### **Characteristics of the included guidelines and consensus statements**

Table 1 summarized the characteristics of the included guidance documents, among which 16 were clinical practice guidelines [14-21, 38, 41, 44-46, 48-52] and eight were consensus statements [22, 36, 37, 39, 40, 42, 43, 47]. 16 national or regional organizations and three international groups, namely the 3e (Evidence, Expertise, Exchange) Initiative, the EULAR, and the development group for the Treat-to-target (T2T) recommendations, published these documents between 2003 to 2017. 16 documents [14-18, 21, 22, 36-38, 40, 42, 43, 45, 46, 49, 50] were issued by rheumatology organizations and seven [16-18, 36, 39, 42, 43] were developed by multinational development groups. 17 documents [14-18, 21, 22, 36, 38-41, 43-46, 49, 51] provided information on guideline development group, among which 11 [14-17, 19-21, 36, 41-43, 45, 46] explicitly stated the involvement of a methodologist. 12 documents [14-18, 21, 22, 38-41, 43-46, 49, 51] provided information on the target audience, among which only three [16, 38, 44] included the patients. 18 documents [14-21, 36, 39-43, 45, 46, 48-52] reported conducting a systematic literature review in the development, among which 17 documents [14-21, 36, 39-41, 43, 45, 46, 48-52] reported the level of evidence in support of recommendations and 16 [16-21, 36, 39-41, 43, 45, 46, 48-52] graded the strength of recommendations. Ten documents [16, 19-21, 39, 42, 46, 48, 49, 51, 52] clearly stated being externally reviewed. Five [19-21, 46, 49, 50] provided a clear time of update plan. 12 documents [14, 15, 17-21, 36, 39, 42, 46, 49, 51, 52] provided information on the funding body, among which six [17, 36, 39, 46, 49, 51] were fully or partially funded by the pharmaceutical industry. The other half did not clearly declare the funding body, which made the impact of industry on the recommendations ambiguous.

### **Appraisal of guidelines and consensus statements**

Figure 2 showed the standardized domain score for each guidance document for the six quality domains assessed with the AGREE II tool. Domain scores

1  
2  
3 were provided in value as Supplementary Table 5. Mean score across  
4 reviewers for individual items were provided as Supplementary Table 6. Item  
5 scores and reasons for scoring for each item were provided as Supplementary  
6 Table 7). The overall quality of guidelines, as assessed by AGREE II, varied  
7 both between guidance documents across domains and within guidance  
8 documents between domains. The document with the highest domain scores  
9 was published by the BSR in 2017 [21], with five domains scoring above the  
10 upper quartile, followed by the documents published by the ACP in 2017 [19,  
11 20], and by the ACR and the EULAR jointly in 2015 [42], both with four  
12 domains scoring above the upper quartile. Guidelines did not always score  
13 higher than consensus statements. The standardized domain scores for each  
14 domain of all guidance documents were visualized by the year of publication in  
15 Supplementary Figure 1. No tendency of improvement in the quality score was  
16 observed.

17  
18  
19  
20  
21  
22  
23  
24  
25  
26  
27  
28  
29  
30  
31 The AGREE II instrument evaluated guidelines and consensus statements in  
32 six domains, from the development, dissemination, to implementation. The  
33 scope and purpose (domain 1) clarifies the clinical questions. Proper  
34 involvement of stakeholders (domain 2) balances individuals' biases. Rigour of  
35 development (domain 3) is the domain most concerned by clinicians and  
36 ensures the validity of development methodology [53]. Clearly presented  
37 recommendations (domain 4) conveyed precise and accessible information  
38 from the development group to clinicians. Good performances in the  
39 applicability (domain 5) and the editorial independence (domain 6) guarantee  
40 the usefulness and the independence of documents.

41  
42  
43  
44  
45  
46  
47  
48  
49  
50  
51 Guidance documents received the highest scores for the scope and purpose  
52 (domain 1, median 85.42%, range 66.67% to 100.00%) and the clarity of  
53 presentation (domain 4, median 79.17%, range 48.61% to 98.61%), and the  
54 lowest scores for the applicability (domain 5, median 10.94%, range 0.00% to  
55  
56  
57  
58  
59  
60

1  
2  
3 66.67%) and the editorial independence (domain 6, median 28.13%, range  
4 0.00% to 83.33%). The worst scored item was the monitoring or auditing  
5 criteria (mean score 1.2, range 1.0-4.0), followed by the implementation advice  
6 or tools (mean 1.7, range 1.0-4.8), the external review (mean 2.1, range  
7 1.0-6.0), and the updating procedure (mean 2.1, range 1.0-6.5).  
8  
9  
10  
11  
12  
13

14 The ICC was 0.896. Group discussion modified 365/2208 (16.53%) of  
15 individual scores. The original and modified item scores and reasons for  
16 modification were provided as Supplementary Table 8.  
17  
18  
19  
20  
21

### 22 **Synthesis of recommendations**

23 The included guidance documents addressed four major themes: diagnosis of  
24 gout and hyperuricemia, treatment for hyperuricemia, treatment for acute gout  
25 attack, and treatment for tophi. Figure 3 showed the key recommendations and  
26 their inconsistencies.  
27  
28  
29  
30  
31

### 32 **Approaches to diagnostic strategies for gout and hyperuricemia**

33 Thirteen guidance documents [17-20, 22, 36, 38, 40-43, 46, 49, 51] covered  
34 the diagnosis of gout and 11 [17, 22, 37, 38, 45-51] covered diagnosis of  
35 hyperuricemia. Supplementary Table 9 showed the key recommendations.  
36 Three aspects were evaluated commonly in gout diagnosis, which is the  
37 clinical manifestation, considered by all documents, the laboratory result,  
38 considered by all but one document [49], and the imaging result, considered by  
39 all but four documents [17, 19, 20, 49, 51]. Identification of monosodium urate  
40 crystals in synovial fluid or tophi was required for definite diagnosis by all  
41 documents.  
42  
43  
44  
45  
46  
47  
48  
49  
50  
51

52 Guidance documents differed when recommending the cut-off serum uric acid  
53 (SUA) level to diagnose hyperuricemia. For any patient with elevates SUA,  
54 four documents [38, 47, 48, 51] recommended 7.0 mg/dL (or 420  $\mu$ mol/L) as  
55  
56  
57  
58  
59  
60

1  
2  
3 the cut-off, while two [17, 45] preferred 6.8 mg/dL. Five documents [22, 37, 46,  
4 49, 50] provided gender-specific cut-offs, recommending 6.0 mg/dL (or 360  
5  $\mu\text{mol/L}$ ) in female and 7.0 mg/dL (or 420  $\mu\text{mol/L}$ ) in male. Asymptomatic  
6 hyperuricemia was defined in seven [36, 38, 46-50] documents, among which  
7 six [36, 38, 46-48, 50] clarified the exclusion of patients with gout and two [36,  
8 48] clarified the exclusion of patients with tophi when making the diagnosis.  
9 Patients with renal diseases were not allowed to be diagnosed with  
10 asymptomatic hyperuricemia in the Japanese [48] and the Philippine [50]  
11 guidelines, but patients with pre-existing renal or cardiovascular diseases were  
12 allowed in the 3e initiative document [36].  
13  
14  
15  
16  
17  
18  
19  
20  
21  
22

### 23 **Approaches to treatment for hyperuricemia**

24  
25 Twenty-two guidance documents [14-17, 19-22, 36-41, 43-52] covered the  
26 treatment for hyperuricemia and Supplementary Table 10 summarized the key  
27 recommendations. All but three documents [19, 20, 44, 52] explicitly  
28 recommended the target levels for long-term SUA control, most of which  
29 preferred 6.0 mg/dL (or 360  $\mu\text{mol/L}$ ), except the South African guideline [51]  
30 that preferred 5.0mg/dL (300  $\mu\text{mol/L}$ ). Only two documents [16, 22]  
31 recommended a lower limit of 3.0 mg/dL (or 180  $\mu\text{mol/L}$ ) for long-term SUA  
32 management and only the 2016 EULAR guideline [16] provided evidence that  
33 low SUA might increase the risk of neurodegenerative diseases, although the  
34 level of evidence and the grade of recommendation were low.  
35  
36  
37  
38  
39  
40  
41  
42  
43  
44

45 All but six guidance documents [36, 39, 40, 43, 44, 52] provided indications for  
46 long-term ULT. Recurrent attacks [14-17, 19-22, 41, 45, 48-51], tophi [14-17,  
47 19-22, 38, 41, 45, 48-51], urate nephrolithiasis [14-17, 19-22, 37, 38, 49, 50],  
48 arthropathy [16, 17, 21, 22, 38, 41, 45, 49], and comorbidities [14-16, 19-22, 37,  
49 47, 49, 50] were the most commonly recommended indications. The definition  
50 of recurrent attacks varied from at least once per year [17] to at least three  
51 times per year [49], while the majority of documents [14-16, 19-21, 41]  
52  
53  
54  
55  
56  
57  
58  
59  
60

1  
2  
3 recommended twice per year as the cut-off.  
4  
5

6  
7 Regarding the timing to initiate ULT, agreement was not made whether to start  
8 pharmacological ULT after an acute attack [17, 21, 22, 36-38, 40, 48, 49, 51,  
9 52] or during an attack [14, 15, 37], and when recommending to start ULT after  
10 an attack, the preferred time to wait since the resolution of attack varied from  
11 two weeks [37, 48] to six weeks [52]. All guidance documents based this  
12 recommendation on expert opinions due to insufficient evidence.  
13  
14

15  
16 Considerations supporting not starting ULT during an attack included that ULT  
17 was better discussed when the patient was not painful [21], and that ULT  
18 initiation could prolong or worsen the acute attack [51]. Two documents [16, 39]  
19 explicitly presented the currently conflicting views and insufficient evidence  
20 and stated consequently no recommendation for this issue.  
21  
22  
23  
24  
25  
26  
27

28  
29 When pharmacological ULT options were provided with prioritization,  
30 allopurinol was recommended by all guidance documents [14-17, 21, 36, 40,  
31 43, 45, 46, 48-50] to be the first-line drug, while febuxostat was recommended  
32 by three documents [14, 15, 17, 46] to be the first-line and by six documents  
33 [16, 21, 36, 40, 43, 45] to be the second-line. However, recommendations on  
34 the dosage of allopurinol varied largely. The maximum dose per day  
35 recommended for allopurinol varied from 300 mg [51], 600 mg [22, 37, 47], 800  
36 mg [14, 15, 17, 38, 45], to 900 mg [21, 43, 46], and the daily starting dose  
37 recommended in patients with normal renal function varied between 50 mg [19,  
38 20, 22, 47, 48, 51] and 200 mg [21]. As for patients with impaired renal function,  
39 the cut-off to initiate dose adjustment was provided diversely as creatinine  
40 clearance (CCr) 20-140 mL/min [37, 45, 46, 49, 51], or estimated glomerular  
41 filtration rate (eGFR) 130 ml/min/1.73m<sup>2</sup> [21]. One document preferred to  
42 depend allopurinol dose solely on eGFR by limiting the maximum dose to 1.5  
43 mg/eGFR in patients with renal impairment [22]. HLA-B\*5801 gene screening  
44 prior to allopurinol use was recommended by five guidance documents [14, 15,  
45  
46  
47  
48  
49  
50  
51  
52  
53  
54  
55  
56  
57  
58  
59  
60



1  
2  
3 21, 22, 37, 38].  
4  
5  
6

7 For patients with asymptomatic hyperuricemia, 14 guidance documents [14, 15,  
8 17, 21, 36-40, 43, 47-49, 51, 52] commented on the option of pharmacological  
9 ULT, among which, five [17, 21, 38, 51, 52] explicitly recommended no  
10 treatment and three [47-49] recommended pharmacological treatments in  
11 patients with comorbidities [47, 48] or with very high SUA levels [40, 47-49].  
12 The cut-off SUA level to indicate ULT in patients with asymptomatic  
13 hyperuricemia varied from 8.0 mg/dL [47, 48] to 13.0 mg/dL [49]. The  
14 Portuguese document [40] was incoherent itself by generally stating that  
15 pharmacological treatment was not recommended while also considered it in  
16 patients with SUA higher than 9 mg/dL. No evidence was provided by these  
17 documents to support pharmacological treatment for asymptomatic  
18 hyperuricemia directly, and such recommendations were made in concern of  
19 the onset of gout [40] and the risk of cardiovascular disorders [47, 48].  
20  
21  
22  
23  
24  
25  
26  
27  
28  
29  
30  
31

### 32 **Approaches to treatment for the acute gout attack**

33  
34 Twenty-one guidance documents [14-17, 19-22, 36-41, 43-46, 48-52] covered  
35 the treatment for acute gout attack and Supplementary Table 11 summarized  
36 their key recommendations. Non-steroidal anti-inflammatory drugs (NSAIDs)  
37 was recommended by all but three documents [19, 20, 39, 44] as the first line  
38 pharmacological treatment, while colchicine by 11 documents [14-17, 21, 22,  
39 36, 37, 40, 43, 45, 48]. Colchicine was recommended to be given in a fixed  
40 dose by three documents [38, 40, 48] and in a loading dose followed by  
41 different doses by six documents [14-17, 19, 20, 22, 38, 51, 52]. Seven  
42 documents [21, 36, 41, 43, 45, 49, 50] only provided the total daily dose for  
43 colchicine regardless of the regimen, the doses recommended by which varied  
44 from 1 mg [21, 49, 50] to 2.4 mg [49], except that one document [43]  
45 recommended 1.8 g in 24 hours without any further explanation. Systemic  
46 steroids were recommended by all but three documents [37, 39, 44], among  
47  
48  
49  
50  
51  
52  
53  
54  
55  
56  
57  
58  
59  
60

1  
2  
3 which six [14-17, 19, 20, 36, 43] recommended them as the first-line option  
4 and ten [21, 22, 38, 41, 45, 46, 48, 50-52] recommended them when NSAIDs  
5 and colchicine were contraindicated or intolerant. Intra-articular steroids  
6 injection was recommended by 14 documents [14-17, 21, 22, 36, 38, 40, 43,  
7 45, 46, 49, 51, 52], among which five [14-16, 21, 36, 43] clearly recommended  
8 it as the first-line option.  
9  
10  
11  
12  
13  
14  
15

### 16 **Approaches to treatment for tophi**

17  
18 Twenty-one guidance documents [14-17, 19-22, 36-41, 43-46, 48-52] covered  
19 the treatment for tophi and Supplementary Table 12 showed their key  
20 recommendations. Surgery was recommended by nine documents [22, 36, 38,  
21 40, 43, 48, 49, 51], among which five [22, 36, 38, 43, 49] explicitly presented  
22 the indications, most commonly nerve compression [22, 36, 38, 43] and  
23 infection [36, 38, 43]. The risk for surgery was discussed by one document [51]  
24 and it only mentioned wound healing. Long-term ULT was recommended by all  
25 but two documents [44, 52], but the pharmacological treatment was only  
26 explicitly recommended by eight of them [15-17, 21, 37, 43, 46, 51].  
27  
28  
29  
30  
31  
32  
33  
34  
35

## 36 **DISCUSSION**

### 37 **Principal findings and interpretations**

38  
39 This systematic review, including 16 guidelines and eight consensus  
40 statements, generally found low in quality and inconsistent recommendations  
41 from guidance documents covering the diagnosis and management of gout  
42 and hyperuricemia. Despite the increase in the number of guidance  
43 documents released between 2003 and 2017, the quality of documents in all  
44 domains did not seem to improve with time. To date, this is the first systematic  
45 appraisal for the quality of hyperuricemia and gout guidance documents.  
46  
47  
48  
49  
50  
51  
52  
53

### 54 **Comparison with existing research**

55  
56 Guidance documents assessed in our study performed acceptable in the  
57  
58  
59  
60

1  
2  
3 scope and purpose and the clarity of presentation, but unsatisfied in the  
4 applicability. These results were consistent with one previous review [54],  
5 which assessed the quality of guidance documents released by the 3e initiative  
6 [36], the ACR [14, 15], and the EULAR [18, 55], respectively. Our study  
7 systematically included all guidelines and consensus statements in this field  
8 and further suggested that this trend of differed quality by domains and differed  
9 recommendations was shared by all guidance documents for gout and  
10 hyperuricemia.  
11  
12  
13  
14  
15  
16  
17  
18  
19

20 Previous reviews of guidance documents in endocrinology and rheumatology  
21 diseases, such as diabetes [56, 57], thyroid disorders [31, 58], rheumatoid  
22 arthritis [32, 59, 60], and systemic lupus erythematosus [61], as well as  
23 reviews for guidance in other specialities [33, 62-64], gave similarly high  
24 scores in the scope and purpose and the clarity and presentation, and similarly  
25 low scores in the applicability and the editorial independence. Despite  
26 generally low and varied scores in the applicability, guidance documents on  
27 gout and hyperuricemia performed poorer in this domain comparing to the  
28 majority of other documents [31-33, 56-58, 60-64], suggesting that the  
29 negligence of the usefulness of guidance being more challenging in gout and  
30 hyperuricemia. The time and cost of the economic evaluations and pilot  
31 studies require a stable and long-term task force of guideline development,  
32 putting applicability scoring in idealism. Although the practical difficulties, the  
33 guidance documents were suggested to at least inform audience the need to  
34 consider these issues [62]. Low scores in the editorial independence often  
35 resulted from lacking detailed information on the influence of funding body and  
36 conflict of interests. We found that 50% of documents declaring funding  
37 sources were supported by the pharmaceutical industry, calling for awareness  
38 of the potential influence of pharmaceutical industry on clinical guidance and  
39 for the need of promoting transparency in the financial declaration.  
40  
41  
42  
43  
44  
45  
46  
47  
48  
49  
50  
51  
52  
53  
54  
55  
56  
57  
58  
59  
60

### Clinical implications and future research

Guidance documents were concordant and recommended to target for SUA < 6.0 mg/dL (or 360µmol/L) for long-term control, to consider recurrent attacks as one of the indications for ULT, although the definitions for recurrent attacks differed, to consider allopurinol as the first-line ULT and NSAIDs as the first-line drug in acute attack, and to consider long-term ULT in patient with tophi. Despite these similarities, recommendations differed in the majority of items and these discrepancies might come from several sources, including ethnic difference, quality of documents, and lacking of evidence.

Ethnic and social differences are important sources for recommendation diversity and such diversity is encouraged to improve the precision of guidance. Ethnicity difference explained the tendency of positive recommendations on HLA-B\*5801 gene screening before prescribing allopurinol by Asian guidance documents [22, 37, 38]. The risk of hypersensitivity reactions associated with allopurinol is significantly increased in individuals carrying the variant allele HLA-B\*5801, the frequency of which in Han Chinese, Korean, and Tai people are higher than that in the Caucasian population [14, 15, 21]. Providing ethnicity-specific recommendations or explicitly specifying the ethnicity of target audience help clarify the source of inconsistency and improve the precision of recommendations.

However, the low quality of guidance documents also leads to discrepant recommendations and consequently chaos in application. Such discrepancies were concerned by clinicians when applying these recommendations in clinical practice and were observed to affect recommendations in the guidance documents for hyperuricemia and gout. Comparing to documents with high quality (scoring above the upper quartile in at least three out of the six AGREE II domains) [16, 19-21, 36, 42, 46], those with low quality (scoring below the lower quartile in at least three out of the six AGREE II domains) [22, 37, 38, 44,

1  
2  
3 47, 52] provided ambiguous prioritization of ULT drugs for hyperuricemia and  
4 of steroid options for acute attack. Among all domains assessed by the  
5 AGREE II instrument, those pertaining to stakeholder involvement, rigor of  
6 development, applicability and editorial independence could be primarily  
7 improved by standardizing the developing processes, which consequently  
8 improved the reliability of recommendations. Guidance documents from China  
9 are facing even greater challenges to adopt standard developing processes  
10 [13].  
11  
12  
13  
14  
15  
16  
17  
18  
19

20 Guidance documents were considered as the starting point to identify evidence  
21 gaps and to prioritize research questions [65]. Evidence gap was an issue  
22 commonly discussed in the recommendations of treatment for asymptomatic  
23 hyperuricemia, by five [14, 15, 36, 37, 39, 43] out of 14 documents [14, 15, 17,  
24 21, 36-40, 43, 47-49, 51, 52], and of timing to initiate ULT, by two [16, 39] out of  
25 14 documents [14-17, 21, 22, 36-40, 48, 49, 51, 52]. Although the rest of  
26 documents provided explicit recommendations, they based their  
27 recommendations either on indirect evidence or expert opinions. Evidence  
28 synthesis for the effects of pharmacological ULT in patients with asymptomatic  
29 hyperuricemia and for the optimal timing to initiate ULT in patients with the  
30 acute attack is warranted to improve the strength and consistency of these  
31 recommendations.  
32  
33  
34  
35  
36  
37  
38  
39  
40  
41  
42  
43

#### 44 **Strengths and limitations**

45 Strengths of our review included a systematic approach to identify guidance  
46 documents pertaining to the diagnosis and management of hyperuricemia and  
47 gout. Both guidelines and consensus statements were evaluated and  
48 compared. We used the AGREE II instrument, an international, validated and  
49 rigorously developed tool, to assess the quality of document development and  
50 we tailored the AGREE II instrument to point-by-point scoring criteria  
51 (Supplementary File 1) to improve the objectivity and reproducibility of our  
52  
53  
54  
55  
56  
57  
58  
59  
60

1  
2  
3 study. We summarized all key recommendations and compared and visualized  
4 the inconsistencies among them, providing concise but informative overview  
5 for clinicians and researchers.  
6  
7  
8  
9

10 Our study also has limitations. Firstly, we only included documents published in  
11 English or Chinese, which could lead to a risk of neglecting essential  
12 documents from regions not using English or Chinese as the first language.  
13  
14

15 We attempted to mitigate this risk by tailoring our search strategy to identify the  
16 English versions of guidance documents published from these regions.  
17

18 Secondly, unconscious bias from a subjective rating of documents was  
19 inevitable. We avoided inviting co-authors of guidance documents as a  
20 reviewer to prevent subconscious competing interest and conducted two  
21 rounds of group discussions to minimize subjective bias. Thirdly, the AGREE II  
22 instrument itself has weaknesses [31, 56, 64, 66], although it was the most  
23 commonly used tool to assess the quality of guidance documents. The AGREE  
24 system assigned equal weight to all six domains, regardless of their relative  
25 importance [67]. Although the higher quality of development methodology and  
26 more transparency of reporting is associated with recommendations that are  
27 more reliable, proper methodology and transparency do not guarantee better  
28 patient outcomes. Hence, the quality scores assessed by the AGREE II should  
29 be interpreted with caution when used to indicate which guidelines to follow in  
30 clinical practice. Moreover, the subjective interpretation of scoring criteria  
31 impeded the replicability of AGREE II studies and direct comparison of quality  
32 scores in guidance documents provided by different reviews.  
33  
34  
35  
36  
37  
38  
39  
40  
41  
42  
43  
44  
45  
46  
47  
48

## 49 **CONCLUSIONS**

50 The methodological quality needs to be improved in the current guidelines on  
51 the diagnosis and management of hyperuricemia and gout, as assessed by the  
52 AGREE II. Inconsistent recommendations are common, even in some key  
53 aspects. Promoting standard methods for guidance documents development  
54  
55  
56  
57  
58  
59  
60

1  
2  
3 and synthesizing high-quality clinical evidence to fill in evidence gaps are  
4 warranted to improve the quality of guidance documents.  
5  
6  
7

## 8 **COMPETING INTERESTS**

9  
10 The authors declare that they have no competing interests.  
11  
12  
13

## 14 **FUNDING**

15  
16 This research received no specific funding from any bodies in the public,  
17 commercial, or not-for-profit sectors. Anoop Shah is supported by the National  
18 Institute for Health Research University College London Hospitals Biomedical  
19 Research Centre. Harry Hemingway is a National Institute for Health Research  
20 (NIHR) Senior Investigator. His work is supported by: 1. Health Data Research  
21 UK, which is funded by the UK Medical Research Council, Engineering and  
22 Physical Sciences Research Council, Economic and Social Research Council,  
23 Department of Health and Social Care (England), Chief Scientist Office of the  
24 Scottish Government Health and Social Care Directorates, Health and Social  
25 Care Research and Development Division (Welsh Government), Public Health  
26 Agency (Northern Ireland), British Heart Foundation and Wellcome Trust. 2.  
27 The BigData@Heart Consortium, funded by the Innovative Medicines  
28 Initiative-2 Joint Undertaking under grant agreement No. 116074. This Joint  
29 Undertaking receives support from the European Union's Horizon 2020  
30 research and innovation programme and EFPIA; it is chaired, by DE Grobbee  
31 and SD Anker, partnering with 20 academic and industry partners and ESC. 3.  
32 The National Institute for Health Research University College London  
33 Hospitals Biomedical Research Centre. Sheyu Li was supported by grants  
34 from the National Natural Science Foundation of China [grant number  
35 81400811 and 21534008], National Basic Research Program of China [grant  
36 number 2015CB942800], the Scientific Research Project of Health and Family  
37 Planning Commission of Sichuan Province [grant number 130029, 150149,  
38 17PJ063 and 17PJ445], Cholesterol Fund by China Cardiovascular  
39  
40  
41  
42  
43  
44  
45  
46  
47  
48  
49  
50  
51  
52  
53  
54  
55  
56  
57  
58  
59  
60

1  
2  
3 Foundation and China Heart House and the International Visiting Program for  
4 Excellent Young Scholars of Sichuan University.  
5  
6  
7

## 8 **AUTHORS' CONTRIBUTIONS**

9  
10 HT and SL conceived this study. QL, JSWK, and SL designed the  
11 inclusion/exclusion criteria and the searching resource and strategy. QL,  
12 JSWK, HC, LL, and XS designed the appraisal strategy of each included  
13 guideline and consensus. QL and XL searched literature search and extracted  
14 data. QL, XL, JW, HL, and SL assessed the quality of each document. QL  
15 analysed and visualized the outcomes. SC, AS, YC, AZ, XS, and HH provided  
16 critical review. QL, XL, and SL drafted the manuscript. All authors discussed  
17 actively in the protocol of the study.  
18  
19  
20  
21  
22  
23  
24  
25  
26  
27  
28  
29  
30  
31  
32  
33  
34  
35  
36  
37  
38  
39  
40  
41  
42  
43  
44  
45  
46  
47  
48  
49  
50  
51  
52  
53  
54  
55  
56  
57  
58  
59  
60



## REFERENCES

1. Lawrence RC, Felson DT, Helmick CG, Arnold LM, Choi H, Deyo RA, Gabriel S, Hirsch R, Hochberg MC, Hunder GG: **Estimates of the prevalence of arthritis and other rheumatic conditions in the United States: Part II.** *Arthritis & Rheumatology* 2008, **58**(1):26-35.
2. Liu R, Han C, Wu D, Xia X, Gu J, Guan H, Shan Z, Teng W: **Prevalence of hyperuricemia and gout in mainland China from 2000 to 2014: a systematic review and meta-analysis.** *BioMed research international* 2015, **2015**.
3. Kuo C-F, Grainge MJ, Zhang W, Doherty M: **Global epidemiology of gout: prevalence, incidence and risk factors.** *Nature reviews rheumatology* 2015, **11**(11):649.
4. Smith E, March L: **Global prevalence of hyperuricemia: a systematic review of population-based epidemiological studies.** *Arthritis & Rheumatology* 2015, **67**:2690-2692.
5. Smith E, Hoy D, Cross M, Merriman TR, Vos T, Buchbinder R, Woolf A, March L: **The global burden of gout: estimates from the Global Burden of Disease 2010 study.** *Annals of the rheumatic diseases* 2014, **73**(8):1470-1476.
6. Kuo C-F, Grainge MJ, Mallen C, Zhang W, Doherty M: **Rising burden of gout in the UK but continuing suboptimal management: a nationwide population study.** *Annals of the rheumatic diseases* 2014:annrheumdis-2013-204463.
7. Li X, Meng X, Timofeeva M, Tzoulaki I, Tsilidis KK, Ioannidis P, Campbell H, Theodoratou E: **Serum uric acid levels and multiple health outcomes: umbrella review of evidence from observational studies, randomised controlled trials, and Mendelian randomisation studies.** *BMJ (Clinical research ed)* 2017, **357**:j2376.
8. Tausche A-K, Jansen TL, Schröder H-E, Bornstein SR, Aringer M, Müller-Ladner U: **Gout—current diagnosis and treatment.** *Deutsches*

- 1  
2  
3 *Aerzteblatt International* 2009, **106**(34-35):549.
- 4  
5 9. Dincer HE, Dincer AP, Levinson DJ: **Asymptomatic hyperuricemia: to**  
6 **treat or not to treat.** *Cleveland Clinic journal of medicine* 2002,  
7  
8 **69**(8):594-608.
- 9  
10 10. Pittman JR, Bross MH: **Diagnosis and management of gout.**  
11  
12 *American family physician* 1999, **59**(7):1799-1806, 1810.
- 13  
14 11. Perez-Ruiz F, Lioté F: **Lowering serum uric acid levels: what is the**  
15 **optimal target for improving clinical outcomes in gout?** *Arthritis*  
16 *care & research* 2007, **57**(7):1324-1328.
- 17  
18 12. Singh JA, Hodges JS, Toscano JP, Asch SM: **Quality of care for gout**  
19 **in the US needs improvement.** *Arthritis care & research* 2007,  
20 **57**(5):822-829.
- 21  
22 13. Chen Y, Wang C, Shang H, Yang K, Norris SL: **Clinical practice**  
23 **guidelines in China.** *BMJ (Clinical research ed)* 2018, **360**:j5158.
- 24  
25 14. Khanna D, Fitzgerald JD, Khanna PP, Bae S, Singh MK, Neogi T,  
26 Pillinger MH, Merrill J, Lee S, Prakash S *et al*: **2012 American College**  
27 **of Rheumatology guidelines for management of gout. Part 1:**  
28 **systematic nonpharmacologic and pharmacologic therapeutic**  
29 **approaches to hyperuricemia.** *Arthritis care & research* 2012,  
30 **64**(10):1431-1446.
- 31  
32 15. Khanna D, Khanna PP, Fitzgerald JD, Singh MK, Bae S, Neogi T,  
33 Pillinger MH, Merrill J, Lee S, Prakash S *et al*: **2012 American college**  
34 **of rheumatology guidelines for management of gout. part 2:**  
35 **Therapy and antiinflammatory prophylaxis of acute gouty arthritis.**  
36 *Arthritis Care and Research* 2012, **64**(10):1447-1461.
- 37  
38 16. Richette P, Doherty M, Pascual E, Barskova V, Becce F,  
39 Castaneda-Sanabria J, Coyfish M, Guillo S, Jansen TL, Janssens H *et*  
40 *al*: **2016 updated EULAR evidence-based recommendations for the**  
41 **management of gout.** *Annals of the rheumatic diseases* 2016.
- 42  
43  
44  
45  
46  
47  
48  
49  
50  
51  
52  
53  
54  
55  
56  
57  
58  
59  
60

- 1  
2  
3  
4  
5  
6  
7  
8  
9  
10  
11  
12  
13  
14  
15  
16  
17  
18  
19  
20  
21  
22  
23  
24  
25  
26  
27  
28  
29  
30  
31  
32  
33  
34  
35  
36  
37  
38  
39  
40  
41  
42  
43  
44  
45  
46  
47  
48  
49  
50  
51  
52  
53  
54  
55  
56  
57  
58  
59  
60
17. Hamburger M, Baraf HS, Adamson TC, 3rd, Basile J, Bass L, Cole B, Doghramji PP, Guadagnoli GA, Hamburger F, Harford R *et al*: **2011 Recommendations for the diagnosis and management of gout and hyperuricemia.** *Postgraduate medicine* 2011, **123**(6 Suppl 1):3-36.
  18. Zhang W, Doherty M, Pascual E, Bardin T, Barskova V, Conaghan P, Gerster J, Jacobs J, Leeb B, Liote F *et al*: **EULAR evidence based recommendations for gout. Part I: Diagnosis. Report of a task force of the Standing Committee for International Clinical Studies Including Therapeutics (ESCISIT).** *Annals of the rheumatic diseases* 2006, **65**(10):1301-1311.
  19. Qaseem A, McLean RM, Starkey M, Forciea MA: **Diagnosis of acute gout: a clinical practice guideline from the American College of Physicians.** *Annals of internal medicine* 2017, **166**(1):52-57.
  20. Qaseem A, Harris RP, Forciea MA: **Management of acute and recurrent gout: a clinical practice guideline from the American College of Physicians.** *Annals of internal medicine* 2017, **166**(1):58-68.
  21. Hui M, Carr A, Cameron S, Davenport G, Doherty M, Forrester H, Jenkins W, Jordan KM, Mallen CD, McDonald TM: **The British Society for Rheumatology guideline for the management of gout.** *Rheumatology* 2017, **56**(7):1056-1059.
  22. Multi-disciplinary Expert Task Force on Hyperuricemia and Its Related Diseases. **Chinese multi-disciplinary consensus on the diagnosis and treatment of hyperuricemia and its related diseases.** *Chin J Intern Med.* 2017; **56**(3): 235-248 (Original document in Chinese).
  23. McLean RM: **The long and winding road to clinical guidelines on the diagnosis and management of gout.** *Annals of internal medicine* 2017, **166**(1):73-74.
  24. Bardin T, Richette P: **Crystal arthritis: new ACR guidelines for gout management hold some surprises.** *Nature Reviews Rheumatology*

- 2013, **9**(1):9.
25. Dalbeth N, Bardin T, Doherty M, Lioté F, Richette P, Saag KG, So AK, Stamp LK, Choi HK, Terkeltaub R: **Discordant American College of Physicians and international rheumatology guidelines for gout management: consensus statement of the Gout, Hyperuricemia and Crystal-Associated Disease Network (G-CAN)**. *Nature Reviews Rheumatology* 2017, **13**(9):561.
26. Khanna PP, FitzGerald J: **Evolution of management of gout: a comparison of recent guidelines**. *Current opinion in rheumatology* 2015, **27**(2):139-146.
27. Li Q, Li X, Kwong JS-W, Chen H, Sun X, Tian H, Li S: **Diagnosis and treatment for hyperuricaemia and gout: a protocol for a systematic review of clinical practice guidelines and consensus statements**. *BMJ open* 2017, **7**(6):e014928.
28. Brouwers MC, Kho ME, Browman GP, Burgers JS, Cluzeau F, Feder G, Fervers B, Graham ID, Grimshaw J, Hanna SE: **AGREE II: advancing guideline development, reporting and evaluation in health care**. *Canadian Medical Association Journal* 2010, **182**(18):E839-E842.
29. Nuckols TK, Anderson L, Popescu I, Diamant AL, Doyle B, Di Capua P, Chou R: **Opioid prescribing: a systematic review and critical appraisal of guidelines for chronic pain**. *Annals of internal medicine* 2014, **160**(1):38-47.
30. Deng Y, Luo L, Hu Y, Fang K, Liu J: **Clinical practice guidelines for the management of neuropathic pain: a systematic review**. *BMC anesthesiology* 2015, **16**(1):12.
31. Huang T-W, Lai J-H, Wu M-Y, Chen S-L, Wu C-H, Tam K-W: **Systematic review of clinical practice guidelines in the diagnosis and management of thyroid nodules and cancer**. *BMC medicine* 2013, **11**(1):191.

- 1  
2  
3  
4 32. Lopez-Olivo MA, Kallen MA, Ortiz Z, Skidmore B, Suarez-Almazor ME:  
5 **Quality appraisal of clinical practice guidelines and consensus**  
6 **statements on the use of biologic agents in rheumatoid arthritis: a**  
7 **systematic review.** *Arthritis care & research* 2008, **59**(11):1625-1638.  
8  
9  
10  
11 33. Nagler EV, Vanmassenhove J, van der Veer SN, Nistor I, Van Biesen W,  
12 Webster AC, Vanholder R: **Diagnosis and treatment of hyponatremia:**  
13 **a systematic review of clinical practice guidelines and consensus**  
14 **statements.** *BMC medicine* 2014, **12**(1):231.  
15  
16  
17  
18 34. **AGREE II training tools. Accessed at**  
19 **<http://www.agreetrust.org-resource-centre-agree-ii-training-tooles/>**  
20 **on 01 August 2017.**  
21  
22  
23  
24 35. Brouwers MC, Kho ME, Browman GP, Burgers JS, Cluzeau F, Feder G,  
25 Fervers B, Graham ID, Hanna SE, Makarski J: **Development of the**  
26 **AGREE II, part 1: performance, usefulness and areas for**  
27 **improvement.** *Canadian Medical Association Journal* 2010,  
28 **182**(10):1045-1052.  
29  
30  
31  
32  
33 36. Sivera F, Andres M, Carmona L, Kydd ASR, Moi J, Seth R,  
34 Sriranganathan M, Van Durme C, Van Echteld I, Vinik O *et al*:  
35 **Multinational evidence-based recommendations for the diagnosis**  
36 **and management of gout: Integrating systematic literature review**  
37 **and expert opinion of a broad panel of rheumatologists in the 3e**  
38 **initiative.** *Annals of the rheumatic diseases* 2014, **73**(2):328-335.  
39  
40  
41  
42  
43  
44 37. Chinese Society of Endocrinology. **Chinese consensus on the**  
45 **management of hyperuricemia and gout.** *Chin J Endocrinol Metab.*  
46 2013; **29**(11): 913-920 (Original document in Chinese).  
47  
48  
49  
50 38. Association TR: **Taiwan guideline for the management of gout and**  
51 **hyperuricemia - updated 2016.** *Formosan Journal of Rheumatology*  
52 2016, **30**:1-32.  
53  
54  
55 39. Kiltz U, Smolen J, Bardin T, Cohen Solal A, Dalbeth N, Doherty M,  
56  
57  
58  
59

- 1  
2  
3 Engel B, Flader C, Kay J, Matsuoka M *et al*: **Treat-to-target (T2T)**  
4 **recommendations for gout.** *Annals of the rheumatic diseases* 2016.  
5  
6  
7 40. Araujo F, Cordeiro I, Teixeira F, Rovisco J, Ramiro S, Mourao AF, Costa  
8 JA, Pimentao JB, Malcata A, Santos MJ *et al*: **Portuguese**  
9 **recommendations for the diagnosis and management of gout.** *Acta*  
10 *reumatologica portuguesa* 2014, **39**(2):158-171.  
11  
12  
13  
14 41. Chinese Rheumatology Association. **2016 Chinese guideline on the**  
15 **diagnosis and management of gout.** *Chin J Intern Med.* 2016: **55**(11):  
16 892-899 (Original document in Chinese).  
17  
18  
19 42. Neogi T, Jansen TLTA, Dalbeth N, Fransen J, Schumacher HR,  
20 Berendsen D, Brown M, Choi H, Edwards NL, Janssens HJEM *et al*:  
21 **2015 Gout classification criteria: An American College of**  
22 **Rheumatology/European League Against Rheumatism**  
23 **collaborative initiative.** *Annals of the rheumatic diseases* 2015,  
24 **74**(10):1789-1798.  
25  
26  
27  
28  
29  
30 43. Graf SW, Whittle SL, Wechalekar MD, Moi JHY, Barrett C, Hill CL,  
31 Littlejohn G, Lynch N, Major G, Taylor AL *et al*: **Australian and New**  
32 **Zealand recommendations for the diagnosis and management of**  
33 **gout: Integrating systematic literature review and expert opinion in**  
34 **the 3e Initiative.** *International journal of rheumatic diseases* 2015,  
35 **18**(3):341-351.  
36  
37  
38  
39  
40  
41 44. Federal Ministry of Health (Nigeria). **National nutritional guideline on**  
42 **non-communicable disease prevention, control and management.**  
43 Accessed at <http://www.health.gov.ng/doc/NutritionalGuideline.pdf> on  
44 28 July 2017.  
45  
46  
47  
48  
49 45. Manara M, Bortoluzzi A, Favero M, Prevete I, Scire CA, Bianchi G,  
50 Borghi C, Cimmino MA, D'Avola GM, Desideri G *et al*: **Italian Society of**  
51 **Rheumatology recommendations for the management of gout.**  
52 *Reumatismo* 2013, **65**(1):4-21.  
53  
54  
55  
56 46. Spanish Society of Rheumatology (SER). **Clinical practice guidelines**  
57  
58  
59  
60

- 1  
2  
3 **for management of gout.** Accessed at  
4 [https://www.ser.es/wp-content/uploads/2015/09/GuipClinGot\\_1140226\\_](https://www.ser.es/wp-content/uploads/2015/09/GuipClinGot_1140226_EN.pdf)  
5 [EN.pdf](https://www.ser.es/wp-content/uploads/2015/09/GuipClinGot_1140226_EN.pdf) on 28 July 2017.  
6  
7  
8  
9 47. Hu D, Ding R: **The diagnosis and treatment advice of**  
10 **cardiovascular disease combined asymptomatic hyperuricemia**  
11 **(second edition).** *Chinese Journal of Cardiovascular Research* 2012,  
12 **10(4):241-249.**  
13  
14  
15  
16 48. Yamanaka H: **Japanese guideline for the management of**  
17 **hyperuricemia and gout: second edition.** *Nucleosides, nucleotides &*  
18 *nucleic acids* 2011, **30(12):1018-1029.**  
19  
20  
21 49. **Ministry of Health Malaysia (MOH). Management of gout. Accessed**  
22 **at <http://www.moh.gov.my/penerbitan/CPG2017/3893.pdf> on 28**  
23 **July 2017.**  
24  
25  
26  
27 50. Li-Yu J, Salido E, Manahan S, Lichauco J, Lorenzo J, Torralba K, Raso  
28 A, Roberto L, Santos EP, Maceda L: **Philippine clinical practice**  
29 **guidelines for the management of gout.** *International journal of*  
30 *rheumatic diseases* 2008, **11:A362.**  
31  
32  
33  
34 51. Meyers OL, Cassim B, Mody GM: **Hyperuricaemia and gout: clinical**  
35 **guideline 2003.** *South African medical journal = Suid-Afrikaanse*  
36 *tydskrif vir geneeskunde* 2003, **93(12 Pt 2):961-971.**  
37  
38  
39  
40 52. The University of Texas at Austin, School of Nursing, Family Nurse  
41 Practitioner Program. **Management of initial gout in adults.** Accessed  
42 at  
43 [http://www.alabmed.com/uploadfile/2014/0515/20140515070230703.pd](http://www.alabmed.com/uploadfile/2014/0515/20140515070230703.pdf)  
44 [f](http://www.alabmed.com/uploadfile/2014/0515/20140515070230703.pdf) on 25 July 2017.  
45  
46  
47  
48  
49 53. Shekelle PG, Woolf SH, Eccles M, Grimshaw J: **Developing guidelines.**  
50 *BMJ (Clinical research ed)* 1999, **318(7183):593-596.**  
51  
52  
53 54. Nuki G: **An appraisal of the 2012 American College of**  
54 **Rheumatology Guidelines for the Management of Gout.** *Current*  
55 *opinion in rheumatology* 2014, **26(2):152-161.**  
56  
57  
58  
59  
60

- 1  
2  
3 55. Zhang W, Doherty M, Bardin T, Pascual E, Barskova V, Conaghan P,  
4 Gerster J, Jacobs J, Leeb B, Liote F *et al*: **EULAR evidence based**  
5 **recommendations for gout. Part II: Management. Report of a task**  
6 **force of the EULAR Standing Committee for International Clinical**  
7 **Studies Including Therapeutics (ESCISIT).** *Annals of the rheumatic*  
8 *diseases* 2006, **65**(10):1312-1324.  
9  
10  
11  
12  
13  
14 56. Holmer HK, Ogden LA, Burda BU, Norris SL: **Quality of clinical**  
15 **practice guidelines for glycemic control in type 2 diabetes mellitus.**  
16 *PloS one* 2013, **8**(4):e58625.  
17  
18  
19  
20 57. Wu CM, Wu AM, Young BK, Wu DJ, Margo CE, Greenberg PB: **An**  
21 **appraisal of clinical practice guidelines for diabetic retinopathy.**  
22 *American Journal of Medical Quality* 2016, **31**(4):370-375.  
23  
24  
25 58. Fang Y, Yao L, Sun J, Zhang J, Li Y, Yang R, Yang K, Tian L: **Appraisal**  
26 **of clinical practice guidelines on the management of**  
27 **hypothyroidism in pregnancy using the Appraisal of Guidelines for**  
28 **Research and Evaluation II instrument.** *Endocrine* 2018:1-11.  
29  
30  
31  
32 59. Hazlewood GS, Akhavan P, Schieir O, Marshall D, Tomlinson G, Bykerk  
33 V, Bombardier C: **Adding a “GRADE” to the quality appraisal of**  
34 **rheumatoid arthritis guidelines identifies limitations beyond**  
35 **AGREE-II.** *Journal of clinical epidemiology* 2014, **67**(11):1274-1285.  
36  
37  
38  
39  
40 60. Palmowski Y, Buttgerit T, Dejaco C, Bijlsma JW, Matteson EL, Voshaar  
41 M, Boers M, Buttgerit F: **“Official View” on Glucocorticoids in**  
42 **Rheumatoid Arthritis: A Systematic Review of International**  
43 **Guidelines and Consensus Statements.** *Arthritis care & research*  
44 2017, **69**(8):1134-1141.  
45  
46  
47  
48  
49 61. Tunnicliffe DJ, Singh-Grewal D, Kim S, Craig JC, Tong A: **Diagnosis,**  
50 **monitoring, and treatment of systemic lupus erythematosus: a**  
51 **systematic review of clinical practice guidelines.** *Arthritis care &*  
52 *research* 2015, **67**(10):1440-1452.  
53  
54  
55  
56  
57  
58  
59  
60



- 1  
2  
3 62. Alonso-Coello P, Irfan A, Solà I, Gich I, Delgado-Noguera M, Rigau D,  
4 Tort S, Bonfill X, Burgers J, Schunemann H: **The quality of clinical**  
5 **practice guidelines over the last two decades: a systematic review**  
6 **of guideline appraisal studies.** *Qual Saf Health Care* 2010,  
7 **19(6):e58-e58.**  
8  
9  
10  
11  
12 63. Devroey D, Vantomme K, Betz W, Vandevoorde J, Kartounian J: **A**  
13 **review of the treatment guidelines on the management of low**  
14 **levels of high-density lipoprotein cholesterol.** *Cardiology* 2004,  
15 **102(2):61-66.**  
16  
17  
18  
19 64. Gavriilidis P, Roberts KJ, Askari A, Sutcliffe RP, Liu P-H, Hidalgo E,  
20 Compagnon P, Lim C, Azoulay D: **Evaluation of the current**  
21 **guidelines for resection of hepatocellular carcinoma using the**  
22 **Appraisal of Guidelines for Research and Evaluation II instrument.**  
23 *Journal of hepatology* 2017, **67(5):991-998.**  
24  
25  
26  
27  
28 65. Li T, Vedula SS, Scherer R, Dickersin K: **What comparative**  
29 **effectiveness research is needed? A framework for using**  
30 **guidelines and systematic reviews to identify evidence gaps and**  
31 **research priorities.** *Annals of internal medicine* 2012, **156(5):367-377.**  
32  
33  
34  
35  
36 66. Brosseau L, Rahman P, Poitras S, Toupin-April K, Paterson G, Smith C,  
37 King J, Casimiro L, De Angelis G, Loew L: **A systematic critical**  
38 **appraisal of non-pharmacological management of rheumatoid**  
39 **arthritis with appraisal of guidelines for research and evaluation II.**  
40 *PloS one* 2014, **9(5):e95369.**  
41  
42  
43  
44  
45 67. Watine J, Friedberg B, Nagy E, Onody R, Oosterhuis W, Bunting PS,  
46 Charet J-C, Horvath AR: **Conflict between guideline methodologic**  
47 **quality and recommendation validity: a potential problem for**  
48 **practitioners.** *Clinical chemistry* 2006, **52(1):65-72.**  
49  
50  
51  
52  
53  
54  
55  
56  
57  
58  
59  
60

## TABLES AND FIGURES

**Table 1. Characteristics of included guidelines and consensus statements**

3e: Evidence, Expertise, Exchange; ACP: American College of Physicians; ACR: American College of Rheumatology; AMM: Academy of Medicine of Malaysia; ASCR: American Society of Clinical Rheumatologists; CS: consensus statement; CVD: cardiovascular diseases; ER: external review; EULAR: European League Against Rheumatism; LOE: level of evidence; MOH: Ministry of Health Malaysia; MSR: Malaysian Society of Rheumatology; Multi: multidisciplinary development group; NG: not given; NIAMS: National Institute of Arthritis and Musculoskeletal and Skin Diseases; NIH: National Institutes of Health; Phy: physicians; Pt: patients; Rheu: rheumatologists; SLR: systematic literature review; SOR: strength of recommendation.

| Document                     | Issuing organization                | Year of publication | Country      | Funding body                  | Target population       | Target audience | Guideline development | Guideline review | Guideline update    | Evidence base | LOE | SOR |
|------------------------------|-------------------------------------|---------------------|--------------|-------------------------------|-------------------------|-----------------|-----------------------|------------------|---------------------|---------------|-----|-----|
| <b>Guidelines</b>            |                                     |                     |              |                               |                         |                 |                       |                  |                     |               |     |     |
| <b>SAMA_2003 [51]</b>        | South African Medical Association   | 2003                | South Africa | Pharmaceutical company        | Gout                    | Phy             | Multi                 | ER               | Intermittent        | NG            | -   | -   |
| <b>EULAR_2006 [18]</b>       | EULAR                               | 2006                | Europe       | EULAR                         | Gout                    | NG              | Rheu                  | NG               | NG                  | SLR           | +   | +   |
| <b>MOH_MSR_AMM_2008 [49]</b> | MOH, MSR, AMM                       | 2008                | Malaysia     | Pharmaceutical company        | Adults (>16y) with gout | Phy             | Multi                 | ER               | 2012 or sooner      | SLR           | +   | +   |
| <b>PRA_2008 [50]</b>         | Philippine Rheumatology Association | 2008                | Philippine   | NG                            | Gout                    | Phy             | NG                    | NG               | Three or more years | SLR           | +   | +   |
| <b>UTAustin_2009 [52]</b>    | University of Texas at Austin       | 2009                | US           | University of Texas at Austin | Adults with gout        | Phy             | NG                    | ER               | NG                  | SLR           | +   | +   |
| <b>EULAR_2011 [17]</b>       | EULAR                               | 2011                | Multination  | Pharmaceutical company, ASCR  | Gout                    | Phy             | Multi                 | NG               | NG                  | SLR           | +   | +   |

|                             |                                                      |      |               |                        |                                     |                     |       |    |                 |     |   |   |
|-----------------------------|------------------------------------------------------|------|---------------|------------------------|-------------------------------------|---------------------|-------|----|-----------------|-----|---|---|
| <b>JSGNAM_2011 [48]</b>     | Japanese Society of Gout and Nucleic Acid Metabolism | 2011 | Japan         | NG                     | Hyperuricemia or gout               | NG                  | NG    | ER | NG              | SLR | + | + |
| <b>ACR_2012 [14, 15]</b>    | ACR                                                  | 2012 | US            | ACR, NIAMS, NIH        | Gout                                | Phy                 | Multi | NG | Intermittent    | SLR | + | - |
| <b>SER_2013 [46]</b>        | Spanish Society of Rheumatology                      | 2013 | Spain         | Pharmaceutical company | Gout                                | Phy                 | Multi | ER | Four years      | SLR | + | + |
| <b>SIR_2013 [45]</b>        | Italian Society of Rheumatology                      | 2013 | Italy         | NG                     | Gout                                | Phy                 | Multi | NG | NG              | SLR | + | + |
| <b>FMOH_2014 [44]</b>       | Federal Ministry of Health (Nigeria)                 | 2014 | Nigeria       | NG                     | Gout                                | Phy, Pts in Nigeria | Multi | NG | NG              | NG  | - | - |
| <b>CRA_2016 [41]</b>        | Chinese Rheumatology Association                     | 2016 | China         | NG                     | Gout in China                       | Phy                 | Multi | NG | NG              | SLR | + | + |
| <b>EULAR_2016 [16]</b>      | EULAR                                                | 2016 | Europe        | NG                     | Gout                                | Phy, Pts            | Multi | ER | Intermittent    | SLR | + | + |
| <b>TRA_2016 [38]</b>        | Taiwan Rheumatology Association                      | 2016 | Taiwan, China | NG                     | Hyperuricemia or gout               | Phy, Pts            | Multi | NG | NG              | NG  | - | - |
| <b>ACP_2017 [19, 20]</b>    | ACP                                                  | 2017 | US            | ACP                    | Acute and recurrent gout            | Phy                 | NG    | ER | Five years      | SLR | + | + |
| <b>BSR_2017 [21]</b>        | The British Society for Rheumatology                 | 2017 | UK            | No specific funding.   | Gout in the UK                      | Phy                 | Multi | ER | Planned in 2020 | SLR | + | + |
| <b>Consensus statements</b> |                                                      |      |               |                        |                                     |                     |       |    |                 |     |   |   |
| <b>CCCP_2012 [47]</b>       | Chinese College of Cardiovascular Physicians         | 2012 | China         | NG                     | Asymptomatic hyperuricemia with CVD | NG                  | NG    | NG | NG              | CS  | - | - |
| <b>3e_2013 [36]</b>         | 3e Initiative                                        | 2013 | Multination   | Pharmaceutical company | Gout                                | NG                  | Rheu  | NG | NG              | SLR | + | + |
| <b>CSE_2013 [37]</b>        | Chinese Society of Endocrinology                     | 2013 | China         | NG                     | Hyperuricemia or gout               | NG                  | NG    | NG | NG              | CS  | - | - |
| <b>3e_PT_2014 [40]</b>      | Portuguese 3e Initiative                             | 2014 | Portugal      | NG                     | Gout in Portuguese                  | NG                  | Rheu  | NG | NG              | SLR | + | + |
| <b>3e_AU_NZ_2015 [43]</b>   | Australian and New Zealand 3e Initiative             | 2015 | Multination   | NG                     | Gout                                | NG                  | Rheu  | NG | NG              | SLR | + | + |

|                            |                                                                                        |      |             |                        |               |     |       |    |              |     |   |   |
|----------------------------|----------------------------------------------------------------------------------------|------|-------------|------------------------|---------------|-----|-------|----|--------------|-----|---|---|
| <b>ACR_EULAR_2015 [42]</b> | ACR/EULAR                                                                              | 2015 | Multination | ACR, EULAR             | Gout          | NG  | NG    | ER | Intermittent | SLR | - | - |
| <b>T2T_2016 [39]</b>       | NG                                                                                     | 2016 | Multination | Pharmaceutical company | Gout          | NG  | Rheu  | ER | NG           | SLR | + | + |
| <b>CRA_multi_2017 [22]</b> | Chinese multi-disciplinary expert task force on hyperuricemia and its related diseases | 2017 | China       | NG                     | Hyperuricemia | Phy | Multi | NG | NG           | CS  | - | - |

1  
2  
3  
4  
5  
6  
7  
8  
9  
10  
11  
12  
13  
14  
15  
16  
17  
18  
19  
20  
21  
22  
23  
24  
25  
26  
27  
28  
29  
30  
31  
32  
33  
34  
35  
36  
37  
38  
39  
40  
41  
42  
43  
44  
45  
46  
47

**Figure 1. Flow diagram for literature search**

NGC, National Guideline Clearinghouse; GIN, Guidelines International Network; NICE, National Institute for Health and Care Excellence; NHS, National Health Service; SIGN, Scottish Intercollegiate Guidelines Network; GAIN, Guidelines and Audit Implementation Network; TRIP, Turning Research Into Practice Database; CBM, Chinese Biomedical Literature Database.

For peer review only

1  
2  
3  
4  
5  
6  
7 **Figure 2. Standardized domain scores for each guidance document**

8 3e: Evidence, Expertise, Exchange Initiative; 3e\_AU\_NZ: Australian and New Zealand 3e Initiative; 3e\_PT: Portuguese 3e Initiative;  
9 ACP: American College of Physicians; ACR: American College of Rheumatology; AMM: Academy of Medicine of Malaysia; ASCR:  
10 American Society of Clinical Rheumatologists; BSR: British Society for Rheumatology; CCCP: Chinese College of Cardiovascular  
11 Physicians; CRA: Chinese Rheumatology Association; CRA\_multi: Chinese multi-disciplinary expert task force on hyperuricemia  
12 and its related diseases; CSE: Chinese Society of Endocrinology; EULAR: European League Against Rheumatism; FMOH: Federal  
13 Ministry of Health (Nigeria); IQR: interquartile range; JSGNAM: Japanese Society of Gout and Nucleic Acid Metabolism; MOH:  
14 Ministry of Health Malaysia; MSR: Malaysian Society of Rheumatology; NIAMS: National Institute of Arthritis and Musculoskeletal  
15 and Skin Diseases; NIH: National Institutes of Health; PRA: Philippine Rheumatology Association; SAMA: South African Medical  
16 Association; SER: Spanish Society of Rheumatology; SIR: Italian Society of Rheumatology; T2T: Treat-to-target recommendations;  
17 TRA: Taiwan Rheumatology Association; UTAustin: University of Texas at Austin.  
18  
19  
20  
21  
22  
23  
24  
25  
26  
27  
28  
29  
30  
31  
32  
33  
34  
35  
36  
37  
38  
39  
40  
41  
42  
43  
44  
45  
46  
47

1  
2  
3  
4  
5  
6  
7 **Figure 3. Summary of key recommendations for the diagnosis and treatment of gout and hyperuricemia**

8 3e: Evidence, Expertise, Exchange Initiative; 3e\_AU\_NZ: Australian and New Zealand 3e Initiative; 3e\_PT: Portuguese 3e Initiative;  
9 ACP: American College of Physicians; ACR: American College of Rheumatology; AMM: Academy of Medicine of Malaysia; ASCR:  
10 American Society of Clinical Rheumatologists; BSR: British Society for Rheumatology; CCCP: Chinese College of Cardiovascular  
11 Physicians; CRA: Chinese Rheumatology Association; CRA\_multi: Chinese multi-disciplinary expert task force on hyperuricemia  
12 and its related diseases; CSE: Chinese Society of Endocrinology; EULAR: European League Against Rheumatism; FMOH: Federal  
13 Ministry of Health (Nigeria); JSGNAM: Japanese Society of Gout and Nucleic Acid Metabolism; MOH: Ministry of Health Malaysia;  
14 MSR: Malaysian Society of Rheumatology; NIAMS: National Institute of Arthritis and Musculoskeletal and Skin Diseases; NIH:  
15 National Institutes of Health; PRA: Philippine Rheumatology Association; SAMA: South African Medical Association; SER: Spanish  
16 Society of Rheumatology; SIR: Italian Society of Rheumatology; SUA: serum uric acid; T2T: Treat-to-target recommendations; TRA:  
17 Taiwan Rheumatology Association; UTAustin: University of Texas at Austin.  
18  
19  
20  
21  
22  
23  
24  
25  
26  
27  
28  
29  
30  
31  
32  
33  
34  
35  
36  
37  
38  
39  
40  
41  
42  
43  
44  
45  
46  
47

### Figure 1 Flow diagram for literature search

NGC, National Guideline Clearinghouse; GIN, Guidelines International Network; NICE, National Institute for Health and Care Excellence; NHS, National Health Service; SIGN, Scottish Intercollegiate Guidelines Network; GAIN, Guidelines and Audit Implementation Network; TRIP, Turning Research Into Practice Database; CBM, Chinese Biomedical Literature Database.

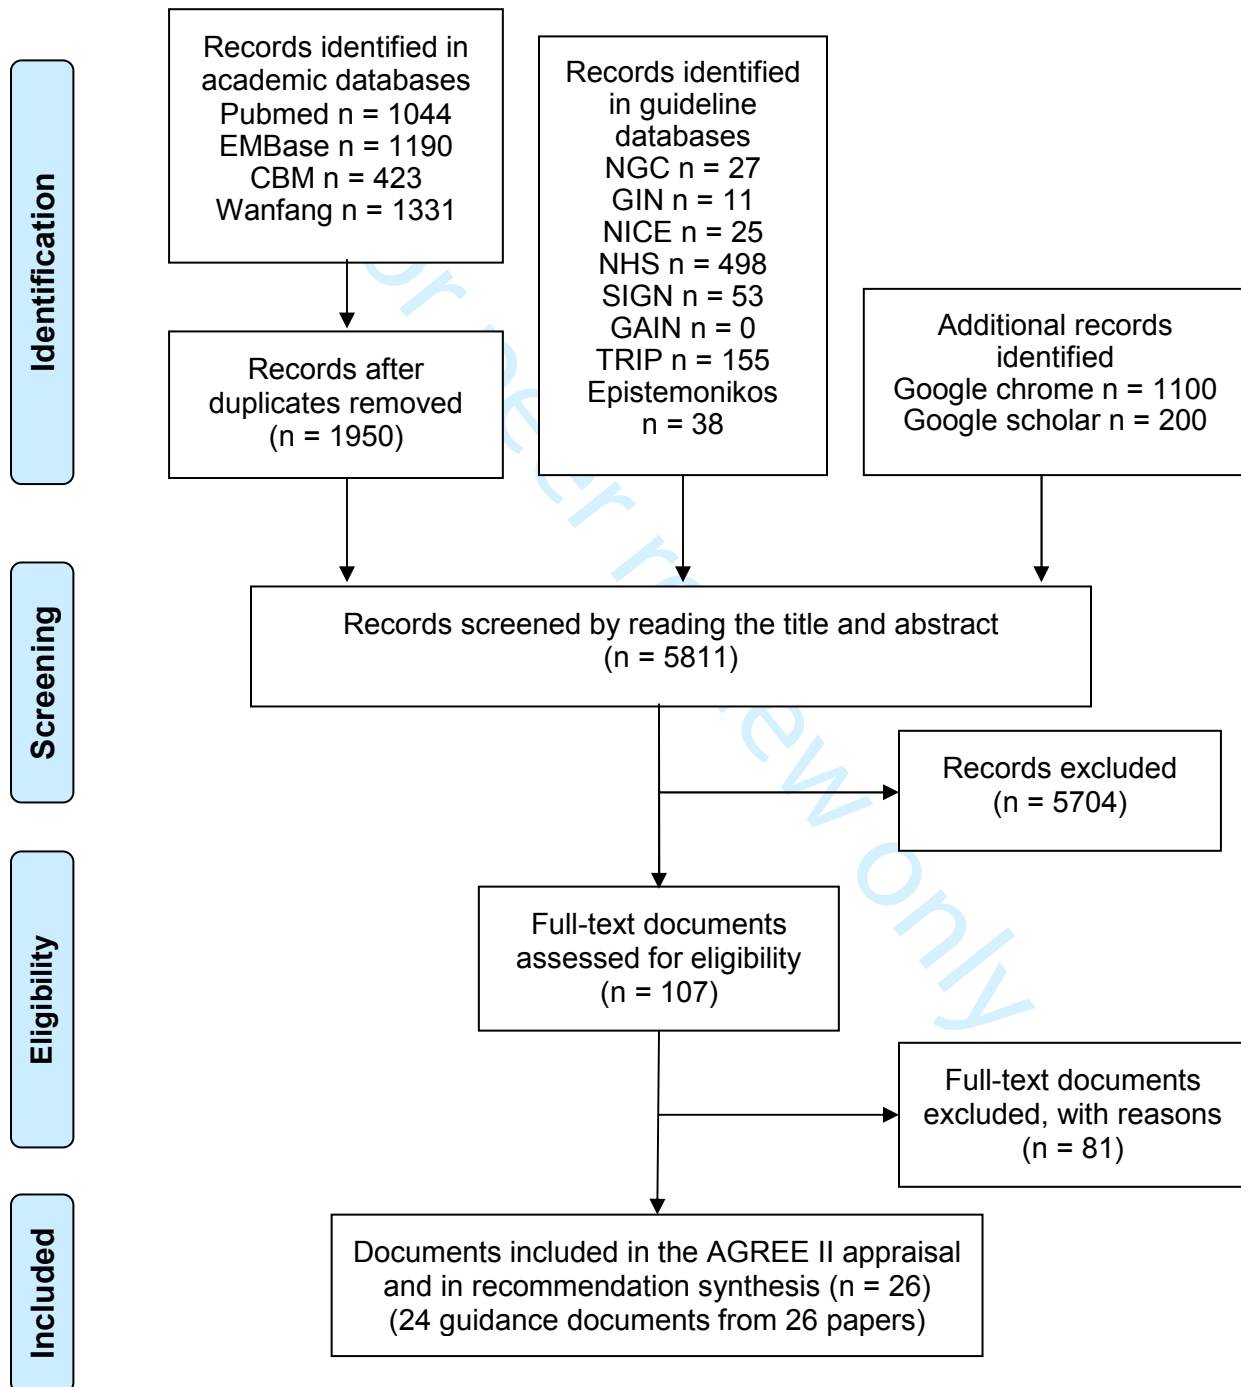

From: Moher D, Liberati A, Tetzlaff J, Altman DG, The PRISMA Group (2009). Preferred Reporting Items for Systematic Reviews and Meta-Analyses: The PRISMA Statement. PLoS Med 6(7): e1000097. doi:10.1371/journal.pmed1000097

For more information, visit [www.prisma-statement.org](http://www.prisma-statement.org).

For peer review only - <http://bmjopen.bmj.com/site/about/guidelines.xhtml>



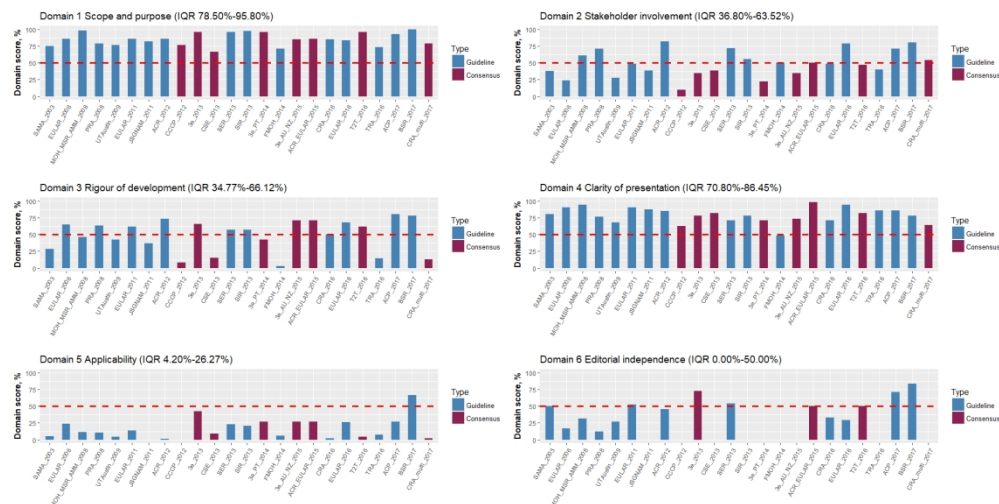

Figure 2. Standardized domain scores for each guidance document

3e: Evidence, Expertise, Exchange Initiative; 3e\_AU\_NZ: Australian and New Zealand 3e Initiative; 3e\_PT: Portuguese 3e Initiative; ACP: American College of Physicians; ACR: American College of Rheumatology; AMM: Academy of Medicine of Malaysia; ASCR: American Society of Clinical Rheumatologists; BSR: British Society for Rheumatology; CCCP: Chinese College of Cardiovascular Physicians; CRA: Chinese Rheumatology Association; CRA\_multi: Chinese multi-disciplinary expert task force on hyperuricemia and its related diseases; CSE: Chinese Society of Endocrinology; EULAR: European League Against Rheumatism; FMOH: Federal Ministry of Health (Nigeria); IQR: interquartile range; JSGNAM: Japanese Society of Gout and Nucleic Acid Metabolism; MOH: Ministry of Health Malaysia; MSR: Malaysian Society of Rheumatology; NIAMS: National Institute of Arthritis and Musculoskeletal and Skin Diseases; NIH: National Institutes of Health; PRA: Philippine Rheumatology Association; SAMA: South African Medical Association; SER: Spanish Society of Rheumatology; SIR: Italian Society of Rheumatology; T2T: Treat-to-target recommendations; TRA: Taiwan Rheumatology Association; UTAustin: University of Texas at Austin.

|                                                                                   | Reference contents                                  | SAMA_2003 (61) | EULAR_2009 (16) | MOH_MSR_AMM_2008 (49) | PRA_2008 (60) | UTAustin_2009 (62) | EULAR_2011 (17) | JSGNAM_2011 (48) | ACR_2012 (14, 15) | CCCP_2012 (47) | 3e_2013 (38) | CSE_2013 (37) | SER_2013 (46) | SIR_2013 (45) | 3e_PT_2014 (40) | FMOH_2014 (44) | 3e_AU_NZ_2015 (43) | ACR_EULAR_2015 (42) | CRA_2016 (41) | EULAR_2016 (18) | T2T_2016 (39) | TRA_2016 (38) | ACP_2017 (19, 20) | BSR_2017 (21) | CRA_multi_2017 (22) |  |
|-----------------------------------------------------------------------------------|-----------------------------------------------------|----------------|-----------------|-----------------------|---------------|--------------------|-----------------|------------------|-------------------|----------------|--------------|---------------|---------------|---------------|-----------------|----------------|--------------------|---------------------|---------------|-----------------|---------------|---------------|-------------------|---------------|---------------------|--|
| <b>Diagnosis and Monitoring</b>                                                   |                                                     |                |                 |                       |               |                    |                 |                  |                   |                |              |               |               |               |                 |                |                    |                     |               |                 |               |               |                   |               |                     |  |
| Definition of gout                                                                | Yes                                                 |                |                 |                       |               |                    |                 |                  |                   |                |              |               |               |               |                 |                |                    |                     |               |                 |               |               |                   |               |                     |  |
| _Clinical manifestations                                                          | Yes                                                 |                |                 |                       |               |                    |                 |                  |                   |                |              |               |               |               |                 |                |                    |                     |               |                 |               |               |                   |               |                     |  |
| _Laboratory results                                                               | Yes                                                 |                |                 |                       |               |                    |                 |                  |                   |                |              |               |               |               |                 |                |                    |                     |               |                 |               |               |                   |               |                     |  |
| _Imaging results                                                                  | Yes                                                 |                |                 |                       |               |                    |                 |                  |                   |                |              |               |               |               |                 |                |                    |                     |               |                 |               |               |                   |               |                     |  |
| _MSU crystal detection as definitive diagnosis                                    | Yes                                                 |                |                 |                       |               |                    |                 |                  |                   |                |              |               |               |               |                 |                |                    |                     |               |                 |               |               |                   |               |                     |  |
| _Is urate deposits clearance monitored by imaging?                                | No                                                  |                |                 |                       |               |                    |                 |                  |                   |                |              |               |               |               |                 |                |                    |                     |               |                 |               |               |                   |               |                     |  |
| _Is the timing to assess urate deposits with imaging provided?                    | No                                                  |                |                 |                       |               |                    |                 |                  |                   |                |              |               |               |               |                 |                |                    |                     |               |                 |               |               |                   |               |                     |  |
| _Is SUA cut-off provided for hyperuricemia?                                       | Yes                                                 |                |                 |                       |               |                    |                 |                  |                   |                |              |               |               |               |                 |                |                    |                     |               |                 |               |               |                   |               |                     |  |
| _All gender                                                                       | 420 µmol/L or 7.0 mg/dL                             |                |                 |                       |               |                    |                 |                  |                   |                |              |               |               |               |                 |                |                    |                     |               |                 |               |               |                   |               |                     |  |
| _Female                                                                           | 360 µmol/L or 6.0 mg/dL                             |                |                 |                       |               |                    |                 |                  |                   |                |              |               |               |               |                 |                |                    |                     |               |                 |               |               |                   |               |                     |  |
| _Male                                                                             | 420 µmol/L or 7.0 mg/dL                             |                |                 |                       |               |                    |                 |                  |                   |                |              |               |               |               |                 |                |                    |                     |               |                 |               |               |                   |               |                     |  |
| _Definition of asymptomatic hyperuricemia                                         | Yes                                                 |                |                 |                       |               |                    |                 |                  |                   |                |              |               |               |               |                 |                |                    |                     |               |                 |               |               |                   |               |                     |  |
| _Gout flare                                                                       | Yes                                                 |                |                 |                       |               |                    |                 |                  |                   |                |              |               |               |               |                 |                |                    |                     |               |                 |               |               |                   |               |                     |  |
| _Tophi                                                                            | Yes                                                 |                |                 |                       |               |                    |                 |                  |                   |                |              |               |               |               |                 |                |                    |                     |               |                 |               |               |                   |               |                     |  |
| _Other medical conditions                                                         | Yes                                                 |                |                 |                       |               |                    |                 |                  |                   |                |              |               |               |               |                 |                |                    |                     |               |                 |               |               |                   |               |                     |  |
| <b>Treatment for Tophi</b>                                                        |                                                     |                |                 |                       |               |                    |                 |                  |                   |                |              |               |               |               |                 |                |                    |                     |               |                 |               |               |                   |               |                     |  |
| Is surgery recommended?                                                           | Yes                                                 |                |                 |                       |               |                    |                 |                  |                   |                |              |               |               |               |                 |                |                    |                     |               |                 |               |               |                   |               |                     |  |
| _Indications for surgery                                                          | Provided                                            |                |                 |                       |               |                    |                 |                  |                   |                |              |               |               |               |                 |                |                    |                     |               |                 |               |               |                   |               |                     |  |
| _Nerve compression                                                                | Yes                                                 |                |                 |                       |               |                    |                 |                  |                   |                |              |               |               |               |                 |                |                    |                     |               |                 |               |               |                   |               |                     |  |
| _Infection                                                                        | Yes                                                 |                |                 |                       |               |                    |                 |                  |                   |                |              |               |               |               |                 |                |                    |                     |               |                 |               |               |                   |               |                     |  |
| _Mechanical impingement                                                           | Yes                                                 |                |                 |                       |               |                    |                 |                  |                   |                |              |               |               |               |                 |                |                    |                     |               |                 |               |               |                   |               |                     |  |
| _Loss of mobility                                                                 | Yes                                                 |                |                 |                       |               |                    |                 |                  |                   |                |              |               |               |               |                 |                |                    |                     |               |                 |               |               |                   |               |                     |  |
| _Severe pain                                                                      | Yes                                                 |                |                 |                       |               |                    |                 |                  |                   |                |              |               |               |               |                 |                |                    |                     |               |                 |               |               |                   |               |                     |  |
| _Tophaceous ulcer                                                                 | Yes                                                 |                |                 |                       |               |                    |                 |                  |                   |                |              |               |               |               |                 |                |                    |                     |               |                 |               |               |                   |               |                     |  |
| _Others                                                                           | Yes                                                 |                |                 |                       |               |                    |                 |                  |                   |                |              |               |               |               |                 |                |                    |                     |               |                 |               |               |                   |               |                     |  |
| _What are the risks of surgery?                                                   | Wound healing                                       |                |                 |                       |               |                    |                 |                  |                   |                |              |               |               |               |                 |                |                    |                     |               |                 |               |               |                   |               |                     |  |
| _Is long-term serum urate lowering treatment recommended?                         | Yes                                                 |                |                 |                       |               |                    |                 |                  |                   |                |              |               |               |               |                 |                |                    |                     |               |                 |               |               |                   |               |                     |  |
| _Is any pharmacological treatment explicitly recommended?                         | Pegloticase                                         |                |                 |                       |               |                    |                 |                  |                   |                |              |               |               |               |                 |                |                    |                     |               |                 |               |               |                   |               |                     |  |
| <b>Treatment for Acute Attack</b>                                                 |                                                     |                |                 |                       |               |                    |                 |                  |                   |                |              |               |               |               |                 |                |                    |                     |               |                 |               |               |                   |               |                     |  |
| First line pharmacological treatment option                                       | Provided                                            |                |                 |                       |               |                    |                 |                  |                   |                |              |               |               |               |                 |                |                    |                     |               |                 |               |               |                   |               |                     |  |
| _NSAIDs                                                                           | Yes                                                 |                |                 |                       |               |                    |                 |                  |                   |                |              |               |               |               |                 |                |                    |                     |               |                 |               |               |                   |               |                     |  |
| _Colchicine                                                                       | Yes                                                 |                |                 |                       |               |                    |                 |                  |                   |                |              |               |               |               |                 |                |                    |                     |               |                 |               |               |                   |               |                     |  |
| _Steroids                                                                         | Yes                                                 |                |                 |                       |               |                    |                 |                  |                   |                |              |               |               |               |                 |                |                    |                     |               |                 |               |               |                   |               |                     |  |
| _What is the dosage of colchicine recommended?                                    | 1.2 mg loading dose followed by 0.6 mg 1 hour later |                |                 |                       |               |                    |                 |                  |                   |                |              |               |               |               |                 |                |                    |                     |               |                 |               |               |                   |               |                     |  |
| _Is intra-articular steroids recommended?                                         | Yes                                                 |                |                 |                       |               |                    |                 |                  |                   |                |              |               |               |               |                 |                |                    |                     |               |                 |               |               |                   |               |                     |  |
| _Indications for intra-articular steroids                                         | Provided                                            |                |                 |                       |               |                    |                 |                  |                   |                |              |               |               |               |                 |                |                    |                     |               |                 |               |               |                   |               |                     |  |
| _Involvement of 1-2 major joints                                                  | Yes                                                 |                |                 |                       |               |                    |                 |                  |                   |                |              |               |               |               |                 |                |                    |                     |               |                 |               |               |                   |               |                     |  |
| _Contraindicated to NSAIDs or colchicine                                          | Yes                                                 |                |                 |                       |               |                    |                 |                  |                   |                |              |               |               |               |                 |                |                    |                     |               |                 |               |               |                   |               |                     |  |
| _Which line of option is intra-articular steroids recommended to be?              | First                                               |                |                 |                       |               |                    |                 |                  |                   |                |              |               |               |               |                 |                |                    |                     |               |                 |               |               |                   |               |                     |  |
| _Is systemic steroids recommended?                                                | Yes                                                 |                |                 |                       |               |                    |                 |                  |                   |                |              |               |               |               |                 |                |                    |                     |               |                 |               |               |                   |               |                     |  |
| _What are the indications for systemic steroids?                                  | Contraindicated to colchicine or NSAIDs             |                |                 |                       |               |                    |                 |                  |                   |                |              |               |               |               |                 |                |                    |                     |               |                 |               |               |                   |               |                     |  |
| _Which line of option is systemic steroids recommended to be?                     | First                                               |                |                 |                       |               |                    |                 |                  |                   |                |              |               |               |               |                 |                |                    |                     |               |                 |               |               |                   |               |                     |  |
| <b>Treatment for Hyperuricemia</b>                                                |                                                     |                |                 |                       |               |                    |                 |                  |                   |                |              |               |               |               |                 |                |                    |                     |               |                 |               |               |                   |               |                     |  |
| Is upper limit for the target SUA provided?                                       | Yes                                                 |                |                 |                       |               |                    |                 |                  |                   |                |              |               |               |               |                 |                |                    |                     |               |                 |               |               |                   |               |                     |  |
| _General target                                                                   | 360 µmol/L or 6.0 mg/dL                             |                |                 |                       |               |                    |                 |                  |                   |                |              |               |               |               |                 |                |                    |                     |               |                 |               |               |                   |               |                     |  |
| _Target for severe cases                                                          | 300 µmol/L or 5.0 mg/dL                             |                |                 |                       |               |                    |                 |                  |                   |                |              |               |               |               |                 |                |                    |                     |               |                 |               |               |                   |               |                     |  |
| _Lower limit for the target SUA                                                   | 180 µmol/L or 3.0 mg/dL                             |                |                 |                       |               |                    |                 |                  |                   |                |              |               |               |               |                 |                |                    |                     |               |                 |               |               |                   |               |                     |  |
| _Is drinking water explicitly recommended as a treatment?                         | Yes                                                 |                |                 |                       |               |                    |                 |                  |                   |                |              |               |               |               |                 |                |                    |                     |               |                 |               |               |                   |               |                     |  |
| _Is urine alkalinization recommended?                                             | Yes                                                 |                |                 |                       |               |                    |                 |                  |                   |                |              |               |               |               |                 |                |                    |                     |               |                 |               |               |                   |               |                     |  |
| _Indications for ULT                                                              | Yes                                                 |                |                 |                       |               |                    |                 |                  |                   |                |              |               |               |               |                 |                |                    |                     |               |                 |               |               |                   |               |                     |  |
| _Recurrent attacks                                                                | Yes                                                 |                |                 |                       |               |                    |                 |                  |                   |                |              |               |               |               |                 |                |                    |                     |               |                 |               |               |                   |               |                     |  |
| _Tophi                                                                            | Yes                                                 |                |                 |                       |               |                    |                 |                  |                   |                |              |               |               |               |                 |                |                    |                     |               |                 |               |               |                   |               |                     |  |
| _Urate nephrolithiasis                                                            | Yes                                                 |                |                 |                       |               |                    |                 |                  |                   |                |              |               |               |               |                 |                |                    |                     |               |                 |               |               |                   |               |                     |  |
| _Arthropathy                                                                      | Yes                                                 |                |                 |                       |               |                    |                 |                  |                   |                |              |               |               |               |                 |                |                    |                     |               |                 |               |               |                   |               |                     |  |
| _Combidities                                                                      | Yes                                                 |                |                 |                       |               |                    |                 |                  |                   |                |              |               |               |               |                 |                |                    |                     |               |                 |               |               |                   |               |                     |  |
| _Others                                                                           | Yes                                                 |                |                 |                       |               |                    |                 |                  |                   |                |              |               |               |               |                 |                |                    |                     |               |                 |               |               |                   |               |                     |  |
| _Should ULT be initiated during or after an acute attack?                         | After an attack                                     |                |                 |                       |               |                    |                 |                  |                   |                |              |               |               |               |                 |                |                    |                     |               |                 |               |               |                   |               |                     |  |
| _What is the first line ULT drug option?                                          | Allopurinol                                         |                |                 |                       |               |                    |                 |                  |                   |                |              |               |               |               |                 |                |                    |                     |               |                 |               |               |                   |               |                     |  |
| _What is the second line ULT drug option?                                         | Febuxostat or Probenecid                            |                |                 |                       |               |                    |                 |                  |                   |                |              |               |               |               |                 |                |                    |                     |               |                 |               |               |                   |               |                     |  |
| _What is the maximum dosage of Allopurinol recommended per day?                   | 600 mg/d                                            |                |                 |                       |               |                    |                 |                  |                   |                |              |               |               |               |                 |                |                    |                     |               |                 |               |               |                   |               |                     |  |
| _What is the cut off for renal function to initiate Allopurinol dose adjustment?  | eGFR 130 ml/min/1.73m <sup>2</sup>                  |                |                 |                       |               |                    |                 |                  |                   |                |              |               |               |               |                 |                |                    |                     |               |                 |               |               |                   |               |                     |  |
| _What is the starting dose for Allopurinol in patient with normal renal function? | 100 mg per day                                      |                |                 |                       |               |                    |                 |                  |                   |                |              |               |               |               |                 |                |                    |                     |               |                 |               |               |                   |               |                     |  |
| _Is HLA-B*5801 gene screening recommended for allopurinol use?                    | Yes                                                 |                |                 |                       |               |                    |                 |                  |                   |                |              |               |               |               |                 |                |                    |                     |               |                 |               |               |                   |               |                     |  |
| _Should prophylaxis be given with ULT?                                            | Yes                                                 |                |                 |                       |               |                    |                 |                  |                   |                |              |               |               |               |                 |                |                    |                     |               |                 |               |               |                   |               |                     |  |
| _Should prophylaxis be given before initiating ULT?                               | Yes                                                 |                |                 |                       |               |                    |                 |                  |                   |                |              |               |               |               |                 |                |                    |                     |               |                 |               |               |                   |               |                     |  |
| _What is the duration for prophylaxis?                                            | 3-6 months                                          |                |                 |                       |               |                    |                 |                  |                   |                |              |               |               |               |                 |                |                    |                     |               |                 |               |               |                   |               |                     |  |
| _Is pharmacological ULT recommended for asymptomatic hyperuricemia?               | Yes                                                 |                |                 |                       |               |                    |                 |                  |                   |                |              |               |               |               |                 |                |                    |                     |               |                 |               |               |                   |               |                     |  |
| _Are comorbidities considered?                                                    | Yes                                                 |                |                 |                       |               |                    |                 |                  |                   |                |              |               |               |               |                 |                |                    |                     |               |                 |               |               |                   |               |                     |  |
| _What is the SUA cut-off?                                                         | 8.0-9.0 mg/dL                                       |                |                 |                       |               |                    |                 |                  |                   |                |              |               |               |               |                 |                |                    |                     |               |                 |               |               |                   |               |                     |  |

Consistent with the reference content  
 Inconsistent with the reference content  
 Partially consistent with the reference content  
 Not given  
 Not applicable

Figure 3. Summary of key recommendations for the diagnosis and treatment of gout and hyperuricemia 3e: Evidence, Expertise, Exchange Initiative; 3e\_AU\_NZ: Australian and New Zealand 3e Initiative; 3e\_PT: Portuguese 3e Initiative; ACP: American College of Physicians; ACR: American College of Rheumatology; AMM: Academy of Medicine of Malaysia; ASCR: American Society of Clinical Rheumatologists; BSR: British Society for Rheumatology; CCCP: Chinese College of Cardiovascular Physicians; CRA: Chinese Rheumatology Association; CRA\_multi: Chinese multi-disciplinary expert task force on hyperuricemia and its related diseases; CSE: Chinese Society of Endocrinology; EULAR: European League Against Rheumatism; FMOH: Federal Ministry of Health (Nigeria); JSGNAM: Japanese Society of Gout and Nucleic Acid Metabolism; MOH: Ministry of Health Malaysia; MSR: Malaysian Society of Rheumatology; NIAMS: National Institute of Arthritis and Musculoskeletal and Skin Diseases; NIH: National Institutes of Health; PRA: Philippine Rheumatology Association; SAMA: South African Medical Association; SER: Spanish Society of Rheumatology; SIR: Italian Society of Rheumatology; SUA: serum uric acid; T2T: Treat-to-target recommendations; TRA: Taiwan Rheumatology Association; UTAustin: University of Texas at Austin.

**Supplementary Materials**

Contents

Supplementary Table 1. Search strategy in Pubmed

Supplementary Table 2. Search strategy in EMBASE using the OVID interface

Supplementary Table 3. Searches in guideline databases

Supplementary Table 4. Excluded studies and reasons for exclusion

Supplementary Table 5. Domain score for each included guidance document

Supplementary Table 6. Mean scores across reviewers for the individual AGREE II domain items

Supplementary Table 7. Scores and reasons for scoring for the individual AGREE II domain items by each reviewer

Supplementary Table 8. Original and modified scores for the individual AGREE II domain items and reasons for modification

Supplementary Table 9. Summary of recommendations for the diagnosis of gout and hyperuricemia by included guidance documents

Supplementary Table 10. Summary of recommendations for the treatment of hyperuricemia by included guidance documents

Supplementary Table 11. Summary of recommendations for the treatment of acute gout by included guidance documents

Supplementary Table 12. Summary of recommendations for the treatment of tophi by included guidance documents

Supplementary Figure 1. Standardized domain scores by the year of publication

Supplementary File 1. Instructions for Guideline Appraisal Using the AGREE II Instrument

**Supplementary Table 1. Search strategy in Pubmed**

|   |                                                                                           |
|---|-------------------------------------------------------------------------------------------|
| 1 | urate* OR uric acid OR gout OR hyperuricemia OR hyperuricaemia                            |
| 2 | guideline OR guideline* OR consensus OR policy OR polic* OR statement* OR recommendation* |
| 3 | 1 AND 2                                                                                   |

For peer review only

**Supplementary Table 2. Search strategy in EMBASE using the OVID interface**

|    |                                        |
|----|----------------------------------------|
| 1  | exp hyperuricemia/                     |
| 2  | exp gout/                              |
| 3  | exp uric acid/                         |
| 4  | exp urate/                             |
| 5  | gout.m_titl.                           |
| 6  | uric acid.m_titl.                      |
| 7  | urate\$.m_titl.                        |
| 8  | hyperuric?emia.m_titl.                 |
| 9  | 1 or 2 or 3 or 4 or 5 or 6 or 7 or 8   |
| 10 | exp practice guideline/                |
| 11 | guideline\$.m_titl.                    |
| 12 | consensus.m_titl.                      |
| 13 | position statement\$.m_titl.           |
| 14 | exp health care policy/ or exp policy/ |
| 15 | recommendation\$.m_titl.               |
| 16 | 10 or 11 or 12 or 13 or 14 or 15       |
| 17 | 9 and 16                               |

**Supplementary Table 3. Searches in guideline databases**

| Databases                                         | Date of search | Search strategy                                                                                                        | Results found | Full text screened | Included documents | URL                                                                                        |
|---------------------------------------------------|----------------|------------------------------------------------------------------------------------------------------------------------|---------------|--------------------|--------------------|--------------------------------------------------------------------------------------------|
| National Guideline Clearinghouse                  | 2017/07/24     | hyperuricaemia OR hyperuricemia OR gout                                                                                | 27            | 6                  | 4                  | <a href="http://www.guideline.gov">www.guideline.gov</a>                                   |
| Guidelines International Network                  | 2017/07/24     | hyperuricaemia OR hyperuricemia OR gout, Search mode: Guidelines                                                       | 11            | 5                  | 5                  | <a href="http://www.g-i-n.net">www.g-i-n.net</a>                                           |
| National Institute for Health and Care Excellence | 2017/07/24     | hyperuricaemia OR hyperuricemia OR gout                                                                                | 25            | 2                  | 0                  | <a href="http://www.nice.org.uk">www.nice.org.uk</a>                                       |
| National Health Service                           | 2017/07/24     | hyperuricaemia OR hyperuricemia OR gout, filter type: guidance and policy                                              | 498           | 5                  | 3                  | <a href="http://www.evidence.nhs.uk">www.evidence.nhs.uk</a>                               |
| Scottish Intercollegiate Guidelines Network       | 2017/07/24     | NA                                                                                                                     | 53            | 0                  | 0                  | <a href="http://www.sign.ac.uk/our-guidelines.html">www.sign.ac.uk/our-guidelines.html</a> |
| Guidelines and Audit Implementation Network       | 2017/07/24     | “hyperuricaemia” OR “hyperuricemia” OR “gout”                                                                          | 0             | 0                  | 0                  | <a href="http://rqia.org.uk/search-result">rqia.org.uk/search-result</a>                   |
| Turning Research Into Practice Database           | 2017/07/24     | hyperuricaemia OR hyperuricemia OR gout, filter: all secondary evidence                                                | 155           | 9                  | 3                  | <a href="http://www.tripdatabase.com">www.tripdatabase.com</a>                             |
| Epistemonikos database                            | 2017/07/24     | hyperuricaemia OR hyperuricemia OR gout, filter: Broad syntheses OR Structured summaries                               | 38            | 2                  | 1                  | <a href="http://www.epistemonikos.org">www.epistemonikos.org</a>                           |
| Chinese Biomedical Literature Database            | 2017/07/22     | [Original search term in Chinese] (hyperuricaemia OR gout) AND (guideline OR consensus OR statement OR recommendation) | 423           | 7                  | 5                  | <a href="http://202.115.54.56/index.jsp">202.115.54.56/index.jsp</a>                       |
| Wanfang Data                                      | 2017/07/22     | [Original search term in Chinese] (hyperuricaemia OR gout) AND (guideline OR consensus OR statement OR recommendation) | 1331          | 19                 | 4                  | <a href="http://www.wanfangdata.com.cn/">www.wanfangdata.com.cn/</a>                       |

Abbreviations: NA: Not applicable.

**Supplementary Table 4. Excluded studies and reasons for exclusion**

| <b>First author</b>    | <b>Year</b> | <b>Reason for exclusion</b>                                                              |
|------------------------|-------------|------------------------------------------------------------------------------------------|
| Wuthrich [68]          | 2016        | Review                                                                                   |
| Cerioti [69]           | 2016        | Primary study                                                                            |
| Liote [70]             | 2016        | Editorial                                                                                |
| de Lautour [71]        | 2016        | Primary study                                                                            |
| de Lautour [72]        | 2014        | Conference abstract                                                                      |
| Dalbeth [73]           | 2015        | Review                                                                                   |
| Terslev [74]           | 2015        | Primary study                                                                            |
| Turk [75]              | 2016        | Not providing specific recommendations for hyperuricemia or gout                         |
| Stewart Coats [76]     | 2016        | Editorial                                                                                |
| Sullivan [77]          | 2015        | Review                                                                                   |
| Gutierrez [78]         | 2015        | Primary study                                                                            |
| Grainger [79]          | 2015        | Primary study                                                                            |
| Robinson [80]          | 2015        | Review                                                                                   |
| Chaudhary [81]         | 2013        | Review                                                                                   |
| Bakris [82]            | 2014        | Multimedia section                                                                       |
| Terkeltaub [83]        | 2013        | Review                                                                                   |
| Lyseng-Williamson [84] | 2013        | Review                                                                                   |
| Deodhar [85]           | 2013        | Review                                                                                   |
| Simao [86]             | 2012        | Review                                                                                   |
| Stamp [87]             | 2011        | Review                                                                                   |
| Jansen [88]            | 2010        | Not produced by related professional associations, institutes, societies, or communities |
| Grainger [89]          | 2009        | Review                                                                                   |
| Grainger [90]          | 2008        | Review                                                                                   |
| Dalbeth [91]           | 2007        | Review                                                                                   |
| Jordan [92]            | 2007        | Replaced by updated versions from the same organization                                  |
| Becker [93]            | 2007        | Not providing specific recommendations for hyperuricemia or gout                         |

|                                           |      |                                                                  |
|-------------------------------------------|------|------------------------------------------------------------------|
| Zhang [55]                                | 2006 | Replaced by updated versions from the same organization          |
| Caramia [94]                              | 2004 | Review                                                           |
| Terkeltaub [95]                           | 2003 | Case report                                                      |
| Cleland [96]                              | 1995 | Review                                                           |
| Hande [97]                                | 1984 | Case series                                                      |
| Committee on the Review of Medicines [98] | 1978 | Not providing specific recommendations for hyperuricemia or gout |
| Mourgues [99]                             | 2016 | Conference abstract                                              |
| Bakris [100]                              | 1970 | Not providing specific recommendations for hyperuricemia or gout |
| Pai [101]                                 | 2015 | Review                                                           |
| Vargas-Santos [102]                       | 2016 | Review                                                           |
| Filiopoulos [103]                         | 2016 | Comment letter                                                   |
| Chinchilla [104]                          | 2016 | Review                                                           |
| Rimler [105]                              | 2016 | Review                                                           |
| Saito [106]                               | 2016 | Not providing specific recommendations for hyperuricemia or gout |
| Mody [107]                                | 2015 | Review                                                           |
| Richette [108]                            | 2014 | Conference abstract                                              |
| Richette [109]                            | 2014 | Conference abstract                                              |
| Gutierrez [110]                           | 2014 | Conference abstract                                              |
| Furst [111]                               | 2013 | Not providing specific recommendations for hyperuricemia or gout |
| Hershfield [112]                          | 2013 | Not providing specific recommendations for hyperuricemia or gout |
| Andres [113]                              | 2012 | Conference abstract                                              |
| Stevenson [114]                           | 2011 | Technology appraisal                                             |
| Diaz-Borjon [115]                         | 2009 | Review                                                           |
| Furst [116]                               | 2010 | Not providing specific recommendations for hyperuricemia or gout |
| Taylor [117]                              | 2009 | Primary study                                                    |
| Taylor [118]                              | 2008 | Primary study                                                    |
| Bussieres [119]                           | 2008 | Not providing specific recommendations for hyperuricemia or gout |
| Brooks [120]                              | 2007 | Review                                                           |



|                                                             |      |                                                                  |
|-------------------------------------------------------------|------|------------------------------------------------------------------|
| Bestermann [121]                                            | 2005 | Not providing specific recommendations for hyperuricemia or gout |
| Schumacher Jr [122]                                         | 2004 | Review                                                           |
| Bartlett [123]                                              | 2002 | Not providing specific recommendations for hyperuricemia or gout |
| Furst [124]                                                 | 2013 | Not providing specific recommendations for hyperuricemia or gout |
| Newberry [125]                                              | 2017 | Review                                                           |
| Shekelle [126]                                              | 2017 | Review                                                           |
| Sandberg [127]                                              | 2015 | Not providing specific recommendations for hyperuricemia or gout |
| Kallinich [128]                                             | 2007 | Not providing specific recommendations for hyperuricemia or gout |
| Preminger [129]                                             | 2007 | Not providing specific recommendations for hyperuricemia or gout |
| TA164 [130]                                                 | 2008 | Technology appraisal                                             |
| Phoon [131]                                                 | 2012 | Not providing specific recommendations for hyperuricemia or gout |
| Li [132]                                                    | 2011 | Review                                                           |
| Zhang [133]                                                 | 2013 | Review                                                           |
| Deng [134]                                                  | 2016 | Primary study                                                    |
| Chinese Rheumatology Association [135]                      | 2004 | Replaced by updated versions from the same organization          |
| Chinese College of Cardiovascular Physicians [136]          | 2010 | Replaced by updated versions from the same organization          |
| Chinese Rheumatology Association [137]                      | 2011 | Replaced by updated versions from the same organization          |
| National Department of Health, Pretoria, South Africa [138] | 2006 | Not providing specific recommendations for hyperuricemia or gout |
| European Medicines Agency [139]                             | 2012 | Not providing specific recommendations for hyperuricemia or gout |
| Agency for Healthcare Research and Quality [140]            | 2017 | Review                                                           |
| Agency for Healthcare Research and Quality [141]            | 2017 | Review                                                           |
| National Institute for Health and Care Excellence [142]     | 2013 | Technology appraisal                                             |
| Agency for Healthcare Research and Quality [143]            | 2016 | Review                                                           |
| National Health System, United Kingdom [144]                | 2013 | Not providing specific recommendations for hyperuricemia or gout |
| Canadian Expert Drug Advisory Committee [145]               | 2011 | Not providing specific recommendations for hyperuricemia or gout |
| CME Academic Detailing Service [146]                        | 2013 | Presented as a 'handout', not a clinical practice guideline.     |
| Henderson [147]                                             | 2015 | Not released by a professional association                       |

Supplementary Table 5. Domain score for each included guidance document

| Document              | Domain 1, % | Domain 2, % | Domain 3, % | Domain 4, % | Domain 5, % | Domain 6, % |
|-----------------------|-------------|-------------|-------------|-------------|-------------|-------------|
| 3e_2013 [36]          | 95.8        | 34.7        | 65.6        | 77.8        | 42.7        | 72.9        |
| 3e_AU_NZ_2015 [43]    | 84.7        | 34.7        | 71.4        | 73.6        | 27.1        | 0.0         |
| 3e_PT_2014 [40]       | 95.8        | 22.2        | 42.7        | 70.8        | 27.1        | 0.0         |
| ACP_2017 [19, 20]     | 93.1        | 70.8        | 80.2        | 86.1        | 27.1        | 70.8        |
| ACR_2012 [14, 15]     | 86.1        | 81.9        | 73.4        | 84.7        | 1.0         | 45.8        |
| ACR_EULAR_2015 [42]   | 86.1        | 50.0        | 71.4        | 98.6        | 27.1        | 50.0        |
| BSR_2017 [21]         | 100.0       | 80.6        | 78.1        | 77.8        | 66.7        | 83.3        |
| CCCP_2012 [47]        | 76.4        | 9.7         | 8.3         | 62.5        | 0.0         | 0.0         |
| CRA_2016 [41]         | 84.7        | 48.6        | 50.5        | 70.8        | 2.1         | 33.3        |
| CRA_multi_2017 [22]   | 79.2        | 54.2        | 13.0        | 63.9        | 2.1         | 0.0         |
| CSE_2013 [37]         | 66.7        | 38.9        | 15.6        | 81.9        | 9.4         | 0.0         |
| EULAR_2006 [18]       | 86.1        | 23.6        | 65.1        | 90.3        | 24.0        | 16.7        |
| EULAR_2011 [17]       | 86.1        | 48.6        | 61.5        | 90.3        | 13.5        | 52.1        |
| EULAR_2016 [16]       | 83.3        | 79.2        | 67.7        | 94.4        | 26.0        | 29.2        |
| FMOH_2014 [44]        | 70.8        | 50.0        | 3.1         | 48.6        | 6.3         | 0.0         |
| JSGNAM_2011 [48]      | 81.9        | 38.9        | 37.0        | 87.5        | 0.0         | 0.0         |
| MOH_MSR_AMM_2008 [49] | 98.6        | 61.1        | 46.4        | 94.4        | 11.5        | 31.3        |
| PRA_2008 [50]         | 79.2        | 70.8        | 63.5        | 76.4        | 10.4        | 12.5        |
| SAMA_2003 [51]        | 75.0        | 37.5        | 28.1        | 80.6        | 5.2         | 50.0        |
| SER_2013 [46]         | 95.8        | 72.2        | 56.8        | 70.8        | 22.9        | 54.2        |
| SIR_2013 [45]         | 97.2        | 55.6        | 56.8        | 77.8        | 20.8        | 0.0         |
| T2T_2016 [39]         | 95.8        | 47.2        | 61.5        | 81.9        | 4.2         | 50.0        |
| TRA_2016 [38]         | 73.6        | 40.3        | 14.1        | 86.1        | 7.3         | 0.0         |
| UTAustin_2009 [52]    | 76.4        | 27.8        | 42.2        | 68.1        | 4.2         | 27.1        |
| <b>Median</b>         | 85.4        | 48.6        | 56.8        | 79.2        | 10.9        | 28.1        |
| <b>Minimum</b>        | 66.7        | 9.7         | 3.1         | 48.6        | 0.0         | 0.0         |
| <b>Maximum</b>        | 100.0       | 81.9        | 80.2        | 98.6        | 66.7        | 83.3        |

Supplementary Table 6. Mean scores across reviewers for the individual AGREE II domain items

| Document              | Domain 1 |     |     | Domain 2 |     |     | Domain 3 |     |     |     |     |     |     | Domain 4 |     |     | Domain 5 |     |     |     | Domain 6 |     |     |
|-----------------------|----------|-----|-----|----------|-----|-----|----------|-----|-----|-----|-----|-----|-----|----------|-----|-----|----------|-----|-----|-----|----------|-----|-----|
|                       | 1        | 2   | 3   | 4        | 5   | 6   | 7        | 8   | 9   | 10  | 11  | 12  | 13  | 14       | 15  | 16  | 17       | 18  | 19  | 20  | 21       | 22  | 23  |
| 3e_2013 [36]          | 6.8      | 6.5 | 7.0 | 7.0      | 1.3 | 1.0 | 6.3      | 3.8 | 6.3 | 5.8 | 5.8 | 6.8 | 4.0 | 1.0      | 6.0 | 7.0 | 4.0      | 6.8 | 1.0 | 5.3 | 1.3      | 7.0 | 3.8 |
| 3e_AU_NZ_2015 [43]    | 6.0      | 5.5 | 6.8 | 5.8      | 1.0 | 2.5 | 6.5      | 6.8 | 7.0 | 6.5 | 6.5 | 6.8 | 1.3 | 1.0      | 5.8 | 6.0 | 4.5      | 5.8 | 1.0 | 2.8 | 1.0      | 1.0 | 1.0 |
| 3e_PT_2014 [40]       | 6.5      | 7.0 | 6.8 | 4.8      | 1.3 | 1.0 | 2.8      | 2.3 | 5.5 | 3.5 | 5.5 | 6.8 | 1.3 | 1.0      | 5.5 | 6.3 | 4.0      | 4.5 | 1.3 | 2.8 | 2.0      | 1.0 | 1.0 |
| ACP_2017 [19, 20]     | 6.0      | 6.8 | 7.0 | 6.3      | 5.3 | 4.3 | 6.8      | 6.8 | 6.5 | 5.0 | 6.5 | 5.3 | 4.8 | 5.0      | 5.3 | 6.8 | 6.5      | 2.5 | 1.8 | 5.3 | 1.0      | 4.0 | 6.5 |
| ACR_2012 [14, 15]     | 6.5      | 5.5 | 6.5 | 7.0      | 5.3 | 5.5 | 7.0      | 7.0 | 6.8 | 6.0 | 5.8 | 6.0 | 1.5 | 3.3      | 5.8 | 7.0 | 5.5      | 1.0 | 1.0 | 1.0 | 1.3      | 3.3 | 4.3 |
| ACR_EULAR_2015 [42]   | 6.5      | 5.0 | 7.0 | 5.3      | 4.8 | 2.0 | 7.0      | 6.8 | 5.3 | 6.0 | 7.0 | 5.5 | 1.8 | 3.0      | 6.8 | 7.0 | 7.0      | 3.8 | 4.0 | 1.8 | 1.0      | 3.8 | 4.3 |
| BSR_2017 [21]         | 7.0      | 7.0 | 7.0 | 5.5      | 5.3 | 6.8 | 7.0      | 6.0 | 6.5 | 6.8 | 6.3 | 6.0 | 5.0 | 2.0      | 6.8 | 6.8 | 3.5      | 4.8 | 4.8 | 6.5 | 4.0      | 7.0 | 5.0 |
| CCCP_2012 [47]        | 6.8      | 3.0 | 7.0 | 2.0      | 1.0 | 1.8 | 1.0      | 1.0 | 1.0 | 1.0 | 3.8 | 2.0 | 1.3 | 1.0      | 4.5 | 5.8 | 4.0      | 1.0 | 1.0 | 1.0 | 1.0      | 1.0 | 1.0 |
| CRA_2016 [41]         | 6.3      | 5.0 | 7.0 | 5.5      | 1.0 | 5.3 | 5.0      | 3.3 | 6.3 | 3.5 | 6.0 | 5.5 | 1.8 | 1.0      | 5.3 | 6.5 | 4.0      | 1.3 | 1.0 | 1.3 | 1.0      | 1.0 | 5.0 |
| CRA_multi_2017 [22]   | 7.0      | 3.5 | 6.8 | 4.8      | 1.3 | 6.8 | 1.0      | 1.0 | 1.0 | 1.3 | 5.0 | 2.8 | 1.3 | 1.0      | 5.0 | 6.5 | 3.0      | 1.0 | 1.3 | 1.0 | 1.3      | 1.0 | 1.0 |
| CSE_2013 [37]         | 7.0      | 1.8 | 6.3 | 3.0      | 1.0 | 6.0 | 1.0      | 1.0 | 2.0 | 1.0 | 5.0 | 3.5 | 1.0 | 1.0      | 5.5 | 5.5 | 6.8      | 3.0 | 1.0 | 1.0 | 1.3      | 1.0 | 1.0 |
| EULAR_2006 [18]       | 6.0      | 5.5 | 7.0 | 5.0      | 1.0 | 1.3 | 7.0      | 7.0 | 5.8 | 4.3 | 6.0 | 5.8 | 1.3 | 2.3      | 6.0 | 6.8 | 6.5      | 1.0 | 2.5 | 5.3 | 1.0      | 3.0 | 1.0 |
| EULAR_2011 [17]       | 6.5      | 5.0 | 7.0 | 5.0      | 1.0 | 5.8 | 4.0      | 4.5 | 6.8 | 6.0 | 7.0 | 7.0 | 1.3 | 1.0      | 5.8 | 6.8 | 6.8      | 1.3 | 1.3 | 3.8 | 1.0      | 3.8 | 4.5 |
| EULAR_2016 [16]       | 6.3      | 4.8 | 7.0 | 5.8      | 5.0 | 6.5 | 5.0      | 2.0 | 6.3 | 6.8 | 6.0 | 6.5 | 6.0 | 2.0      | 6.5 | 6.8 | 6.8      | 3.0 | 1.3 | 5.0 | 1.0      | 1.5 | 4.0 |
| FMOH_2014 [44]        | 6.5      | 2.8 | 6.5 | 5.3      | 1.0 | 5.8 | 1.0      | 1.0 | 1.0 | 2.0 | 1.5 | 1.0 | 1.0 | 3.0      | 4.5 | 4.3 | 1.0      | 1.3 | 2.3 | 1.0 | 1.0      | 1.0 | 1.0 |
| JSGNAM_2011 [48]      | 5.3      | 5.5 | 7.0 | 1.8      | 4.3 | 4.0 | 1.3      | 1.0 | 6.8 | 3.3 | 6.3 | 3.8 | 2.5 | 1.0      | 6.8 | 6.3 | 5.8      | 1.0 | 1.0 | 1.0 | 1.0      | 1.0 | 1.0 |
| MOH_MSR_AMM_2008 [49] | 6.8      | 7.0 | 7.0 | 5.5      | 1.5 | 7.0 | 4.3      | 1.0 | 5.8 | 1.5 | 5.8 | 4.8 | 2.5 | 4.8      | 6.5 | 6.8 | 6.8      | 1.8 | 3.0 | 1.0 | 1.0      | 4.0 | 1.8 |
| PRA_2008 [50]         | 6.5      | 5.5 | 5.3 | 3.8      | 5.0 | 7.0 | 5.0      | 4.3 | 7.0 | 4.8 | 6.5 | 4.8 | 1.3 | 5.0      | 5.3 | 6.5 | 5.0      | 1.8 | 1.3 | 2.5 | 1.0      | 1.0 | 2.5 |
| SAMA_2003 [51]        | 6.5      | 3.0 | 7.0 | 4.0      | 1.3 | 4.5 | 1.0      | 1.0 | 1.0 | 4.0 | 6.5 | 2.8 | 2.5 | 2.8      | 5.0 | 6.5 | 6.0      | 1.0 | 2.0 | 1.3 | 1.0      | 7.0 | 1.0 |
| SER_2013 [46]         | 7.0      | 6.3 | 7.0 | 6.8      | 5.0 | 4.3 | 3.3      | 1.0 | 7.0 | 4.0 | 6.8 | 4.8 | 2.0 | 6.5      | 5.8 | 6.8 | 4.3      | 3.5 | 2.3 | 2.8 | 1.0      | 6.5 | 2.0 |
| SIR_2013 [45]         | 6.8      | 6.8 | 7.0 | 6.3      | 1.0 | 5.8 | 4.0      | 6.8 | 6.3 | 4.3 | 6.3 | 5.5 | 1.3 | 1.0      | 6.3 | 6.8 | 4.0      | 2.5 | 1.0 | 4.5 | 1.0      | 1.0 | 1.0 |
| T2T_2016 [39]         | 6.3      | 7.0 | 7.0 | 5.3      | 5.0 | 1.3 | 7.0      | 6.5 | 6.5 | 6.5 | 3.3 | 4.0 | 1.8 | 2.0      | 5.0 | 6.3 | 6.5      | 2.0 | 1.0 | 1.0 | 1.0      | 3.5 | 4.5 |
| TRA_2016 [38]         | 5.8      | 3.5 | 7.0 | 5.0      | 1.5 | 3.8 | 1.0      | 1.3 | 1.0 | 1.3 | 5.5 | 2.5 | 1.3 | 1.0      | 5.5 | 6.5 | 6.5      | 1.0 | 1.5 | 2.3 | 1.0      | 1.0 | 1.0 |
| UTAustin_2009 [52]    | 7.0      | 2.8 | 7.0 | 3.0      | 1.0 | 4.0 | 4.3      | 2.0 | 7.0 | 2.5 | 4.3 | 5.3 | 2.0 | 1.0      | 4.8 | 5.3 | 5.3      | 1.3 | 1.5 | 1.3 | 1.0      | 4.0 | 1.3 |

**Supplementary Table 7. Scores and reasons for scoring for the individual AGREE II domain items by each reviewer**

|                     | Reviewer_1, scores | Reviewer_1, comments                                                                                             | Reviewer_2, scores | Reviewer_2, comments                                                                                                                                                                                                                                                                                        | Reviewer_3, scores | Reviewer_3, comments                              | Reviewer_4, scores | Reviewer_4, comments    |
|---------------------|--------------------|------------------------------------------------------------------------------------------------------------------|--------------------|-------------------------------------------------------------------------------------------------------------------------------------------------------------------------------------------------------------------------------------------------------------------------------------------------------------|--------------------|---------------------------------------------------|--------------------|-------------------------|
| <b>3e_2013 [36]</b> |                    |                                                                                                                  |                    |                                                                                                                                                                                                                                                                                                             |                    |                                                   |                    |                         |
| Item 1              | 7                  | Abstract and Introduction.                                                                                       | 6                  | Easy to find. "we aimed to develop evidence-based multinational recommendations for the diagnosis and management of gout."<br>-1: the "introduction" part introduced the harm of gout and the difficulty of its management, but expected benefit or outcome of this guideline is not clearly stated.        | 7                  | All included                                      | 7                  | Well described          |
| Item 2              | 7                  | Table 1.                                                                                                         | 7                  | Table 1, well written & easy to find.                                                                                                                                                                                                                                                                       | 5                  | Contained "ab"                                    | 7                  | Well described          |
| Item 3              | 7                  | Abstract and Introduction.                                                                                       | 7                  | Patient with "gout", easy to find.                                                                                                                                                                                                                                                                          | 7                  | All included                                      | 7                  | Well described          |
| Item 4              | 7                  | Methods section and Contributors.                                                                                | 7                  | Complete & easy to find. "Method" part & "Contributor" part. An experienced librarian (LF) is in the development group.                                                                                                                                                                                     | 7                  | All included                                      | 7                  | Well described          |
| Item 5              | 1                  | Not sought.                                                                                                      | 1                  | -6: Patients with gout are not involved in the development progress.                                                                                                                                                                                                                                        | 2                  | Participation in the guideline development group, | 1                  | Not found               |
| Item 6              | 1                  | Not provided.                                                                                                    | 1                  | -6: No description about target users.                                                                                                                                                                                                                                                                      | 1                  | Not mentioned                                     | 1                  | Not found               |
| Item 7              | 6                  | Methods section. B) was not provided.                                                                            | 6                  | "Method" part & figure S1 S2; well written; easy to find.<br>-1: the searched time periods are not provided.                                                                                                                                                                                                | 7                  | All included                                      | 6                  | No time periods         |
| Item 8              | 4                  | Methods section. Only the language criterion of included articles was provided.                                  | 2                  | There is a description of inclusion & exclusion criteria: "published in English or in a language in which at least one member of the bibliographic group was fluent (Dutch, French, German, Spanish)."<br>-5: target population characteristics, study design or outcomes are not included in the criteria. | 5                  | Not mentioned the study design                    | 4                  | The details are unclear |
| Item 9              | 4                  | Results section. The most informative recommendation was Recommendation 6, in which b) and c) were not provided. | 7                  | "The level of evidence for each recommendation was appraised and graded in accordance with the Oxford Centre for Evidence-based Medicine Levels of Evidence".                                                                                                                                               | 7                  | All included                                      | 7                  | Well described          |

|         |   |                                                                                                           |   |                                                                                                                                                                                                                                                                                                                                                                                                                                                       |   |                                |   |                                                       |
|---------|---|-----------------------------------------------------------------------------------------------------------|---|-------------------------------------------------------------------------------------------------------------------------------------------------------------------------------------------------------------------------------------------------------------------------------------------------------------------------------------------------------------------------------------------------------------------------------------------------------|---|--------------------------------|---|-------------------------------------------------------|
|         |   | Besides, only some of the evidences met these criteria.                                                   |   | Pooled data were "sufficiently homogeneous".                                                                                                                                                                                                                                                                                                                                                                                                          |   |                                |   |                                                       |
| Item 10 | 5 | Methods section. Although a modified Delphi process was adopted, c) was not provided.                     | 5 | Clearly stated in "Methods" part.<br>-2: No outcomes of the process.                                                                                                                                                                                                                                                                                                                                                                                  | 6 | All included                   | 7 | Well described                                        |
| Item 11 | 7 | Results section.                                                                                          | 6 | Most informative: recommendation 5.<br>-1: Not all recommendations reflect the consideration of benefits and harms, example: recommendation 9.                                                                                                                                                                                                                                                                                                        | 5 | Subtract 1'                    | 5 | Some recommends give the harms but no supporting data |
| Item 12 | 7 | Results section.                                                                                          | 7 | Table 2.<br>Each recommendation include a paragraph that describes the key evidences.                                                                                                                                                                                                                                                                                                                                                                 | 6 | All included                   | 7 | Well described                                        |
| Item 13 | 2 | Provenance and peer review section. It was only stated that (the guideline was) externally peer reviewed. | 4 | The guideline is published through a peer-reviewed journal; it was Received on 21 January 2013 , Revised on 15 May 2013 , Accepted on 29 June 2013.<br>-1 : The purpose and intent of external review is not provided.<br>-1: the outcome/information gathered from the external review is not described.<br>-1: the external reviewers are not described.                                                                                            | 5 | Externally peer reviewed.      | 5 | External peer review                                  |
| Item 14 | 1 | Not provided.                                                                                             | 1 | -6: no update information or services provided                                                                                                                                                                                                                                                                                                                                                                                                        | 1 | Not mentioned the study design | 1 | Not found                                             |
| Item 15 | 6 | Results section. Some recommendations did not provide b).                                                 | 6 | The most informative: recommendation 5.<br>-1: Not all recommendations are specific enough. Example: recommendation 9, information about surgery doesn't include all the required aspects.                                                                                                                                                                                                                                                            | 5 | Subtract 1                     | 7 | A figure                                              |
| Item 16 | 7 | Results section.                                                                                          | 7 | The different options for management of the condition or health issue are clearly presented.                                                                                                                                                                                                                                                                                                                                                          | 7 | All included                   | 7 | Well described                                        |
| Item 17 | 4 | Recommendations were summarized as table 2, but were not grouped in a certain section.                    | 4 | Table 2.<br>-3: recommendations are not grouped in the guideline.                                                                                                                                                                                                                                                                                                                                                                                     | 4 | Not grouped                    | 4 | The key part is unclear                               |
| Item 18 | 7 | Table 3 and Discussion section.                                                                           | 7 | Barriers: recommendation 1.<br>Facilitators: Table 3 & "Discussion" part ("the high level of agreement with the final recommendations and the multinational participation increases their utility and will hopefully facilitate their dissemination and implementation worldwide. Most participating rheumatologists either follow the recommendations or are willing to change their practice according to them, suggesting a solid potential impact | 7 | All included                   | 6 | In recommendation 1, table 1 and discussion           |

|                           |   |                                                                                                                    |   |                                                                                                                                                                                                                                     |   |                                                                      |                                                                                                                                                                                                                                        |
|---------------------------|---|--------------------------------------------------------------------------------------------------------------------|---|-------------------------------------------------------------------------------------------------------------------------------------------------------------------------------------------------------------------------------------|---|----------------------------------------------------------------------|----------------------------------------------------------------------------------------------------------------------------------------------------------------------------------------------------------------------------------------|
|                           |   |                                                                                                                    |   | of this set of recommendations.")                                                                                                                                                                                                   |   |                                                                      |                                                                                                                                                                                                                                        |
| Item 19                   | 1 | Not provided.                                                                                                      | 1 | -6: No such information.                                                                                                                                                                                                            | 1 | Not mentioned the study design                                       | 1 Not found                                                                                                                                                                                                                            |
| Item 20                   | 5 | Available evidence for cost-efficacy was discussed.                                                                | 6 | Example: recommendation 1 & 5. Evidences about cost are included and influenced the recommendation.<br>-1: Information/description of the cost information that emerged from the inquiry is not described.                          | 5 | Identification of the types of cost information that were considered | 5 The discussion part mentions cost                                                                                                                                                                                                    |
| Item 21                   | 1 | Not provided.                                                                                                      | 1 | -6: No such information.                                                                                                                                                                                                            | 2 | Mentioned a                                                          | 1 Not found                                                                                                                                                                                                                            |
| Item 22                   | 7 | Funding section.                                                                                                   | 7 | "Funding" part, clear & easy to find.                                                                                                                                                                                               | 7 | All included                                                         | 7 Well described                                                                                                                                                                                                                       |
| Item 23                   | 4 | Competing interests section. B) and d) were not provided.                                                          | 4 | "Competing interests" part, easy to find.<br>-2: no information about how they influenced the guideline.<br>-1: methods by which they were sought are not provided.                                                                 | 3 | Mentioned ac                                                         | 4 No statement                                                                                                                                                                                                                         |
| <b>3e_AU_NZ_2015 [43]</b> |   |                                                                                                                    |   |                                                                                                                                                                                                                                     |   |                                                                      |                                                                                                                                                                                                                                        |
| Item 1                    | 5 | Abstract and Introduction. b) was provided as epidemiology. But not easy to find.                                  | 7 | To develop evidence-based recommendations for the diagnosis and management of gout in Australia and New Zealand as part of the multi-national 3e Initiative in abstract & "the aim of improving patient care" in "discussion" part. | 5 | All included                                                         | 7 Well described                                                                                                                                                                                                                       |
| Item 2                    | 5 | Page 342. It was stated that a set of clinical questions were investigated but the question list was not provided. | 5 | 10 international & 1 national question.<br>-2: the details of questions are not provided.                                                                                                                                           | 7 | Contained "ab"                                                       | 5 It has questions but not all the five aspects                                                                                                                                                                                        |
| Item 3                    | 7 | Abstract                                                                                                           | 7 | Gout                                                                                                                                                                                                                                | 7 | All included                                                         | 6 Not easy to be found                                                                                                                                                                                                                 |
| Item 4                    | 7 | Pages 341, 348.                                                                                                    | 7 | Clear & easy to find.<br>An epidemiologist (rb) involved.                                                                                                                                                                           | 4 | Not mentioned expertise                                              | 5 The expertise is not stated                                                                                                                                                                                                          |
| Item 5                    | 1 | Not provided.                                                                                                      | 1 | -6: patients with gout are not involved.                                                                                                                                                                                            | 1 | Not mentioned                                                        | 1 Not found                                                                                                                                                                                                                            |
| Item 6                    | 2 | Inferred from Abstract and Introduction section. But the item was not clearly stated throughout the paper.         | 1 | -6: not mentioned.                                                                                                                                                                                                                  | 4 | No Clear description of intended guideline audience                  | 3 Analyze from the abstract                                                                                                                                                                                                            |
| Item 7                    | 7 | References 7-16.                                                                                                   | 5 | Same as 3e.<br>-1: no time period.<br>-1: no description of the literature search of the one national question.                                                                                                                     | 7 | All included                                                         | 7 "A comprehensive search strategy was developed with the aid of an experienced librarian, for MEDLINE, EMBASE, CENTRAL as well as hand searches of the reference list of the selected articles and of abstracts presented at the 2010 |

|         |   |                                                                        |   |                                                                                                                                                                                                                                               |   |                                                                                            |                                             |                                                                |
|---------|---|------------------------------------------------------------------------|---|-----------------------------------------------------------------------------------------------------------------------------------------------------------------------------------------------------------------------------------------------|---|--------------------------------------------------------------------------------------------|---------------------------------------------|----------------------------------------------------------------|
|         |   |                                                                        |   |                                                                                                                                                                                                                                               |   |                                                                                            | and 2011 ACR and EULAR scientific meetings" |                                                                |
| Item 8  | 7 | References 7-16.                                                       | 7 | It is described in References 7-16.                                                                                                                                                                                                           | 7 | All included                                                                               | 6                                           | In the methods and appendix                                    |
| Item 9  | 7 | Page 342. Oxford Centre for Evidence-based Medicine Level of Evidence. | 7 | It is described in References 7-16.                                                                                                                                                                                                           | 7 | All included                                                                               | 7                                           | Well described                                                 |
| Item 10 | 7 | Methods section. Outcomes as table 1 - agreement mean.                 | 6 | Not all outcomes are missing, some are described.                                                                                                                                                                                             | 7 | All included                                                                               | 6                                           | Can be found in the methods                                    |
| Item 11 | 7 | Recommendations section.                                               | 6 | Most informative (recommendation 4)<br>-1: not all recommendations reflect the consideration of benefits and harms ( recommendation 6)                                                                                                        | 7 | All included                                                                               | 6                                           | Well described                                                 |
| Item 12 | 7 | Methods and Results section. Evidence summary was provided.            | 7 | Table 1 & methods.<br>Each recommendation has a paragraph describing relative evidences.                                                                                                                                                      | 7 | All included                                                                               | 6                                           | Well described                                                 |
| Item 13 | 2 | Published in a peer reviewed journal.                                  | 1 | -6: not mentioned.                                                                                                                                                                                                                            | 1 | Not mentioned                                                                              | 1                                           | Not found                                                      |
| Item 14 | 1 | Not provided.                                                          | 1 | '-6; not mentioned.                                                                                                                                                                                                                           | 1 | Not mentioned                                                                              | 1                                           | Not found                                                      |
| Item 15 | 5 | Recommendations section. B) was not provided.                          | 6 | The intent or purpose of each recommendation is not provided.                                                                                                                                                                                 | 6 | All included                                                                               | 6                                           | Well described but no purpose                                  |
| Item 16 | 6 | Recommendations section. B) was not provided in recommendation 4.      | 7 | All points are included.                                                                                                                                                                                                                      | 5 | Only some options are provided with the most appropriate population or clinical situation. | 6                                           | Well described, ex:recommend 6                                 |
| Item 17 | 4 | Not grouped in a certain section.                                      | 4 | Table 1<br>-3: recommendations are not grouped.                                                                                                                                                                                               | 6 | Contained ab                                                                               | 4                                           | Table 1                                                        |
| Item 18 | 6 | Discussion section, the second paragraph.                              | 6 | "A high level of agreement was seen among the experts for the final recommendations, providing further support for their validity and hopefully facilitating their dissemination and implementation."<br>-1: no influence of the development. | 6 | All included                                                                               | 5                                           | Be discussed in the discussion part                            |
| Item 19 | 1 | Not provided.                                                          | 1 | -6: not mentioned.                                                                                                                                                                                                                            | 1 | Not mentioned                                                                              | 1                                           | Not found                                                      |
| Item 20 | 2 | Page 345. Only the cost-efficacy issue was mentioned.                  | 4 | E.g. Recommendation 4.<br>-2: no methods described.<br>-1: no description of the cost information that emerged from the inquiry.                                                                                                              | 2 | Mentioned a                                                                                | 3                                           | In some recommends, the cost is considered but without methods |
| Item 21 | 1 | Not provided.                                                          | 1 | -6: not mentioned.                                                                                                                                                                                                                            | 1 | Not mentioned                                                                              | 1                                           | Not found                                                      |

|                        |   |                                                                                    |   |                                                                                                                                                                     |   |                              |   |                                                  |
|------------------------|---|------------------------------------------------------------------------------------|---|---------------------------------------------------------------------------------------------------------------------------------------------------------------------|---|------------------------------|---|--------------------------------------------------|
| Item 22                | 1 | Not provided.                                                                      | 1 | -6: no information about funding.                                                                                                                                   | 1 | Not mentioned                | 1 | Not found                                        |
| Item 23                | 1 | Not provided.                                                                      | 1 | -6: no information about competing interests.                                                                                                                       | 1 | Not mentioned                | 1 | Not found                                        |
| <b>3e_PT_2014 [40]</b> |   |                                                                                    |   |                                                                                                                                                                     |   |                              |   |                                                  |
| Item 1                 | 6 | Title and abstract. B) was only provided as epidemiological information.           | 6 | "To develop Portuguese evidence-based recommendations for the Diagnosis and Management of Gout" & "purpose of improving patient care"<br>-1: Not very easy to find. | 7 | All included                 | 7 | Can be found in the objective part               |
| Item 2                 | 7 | Table 1.                                                                           | 7 | Table 1.                                                                                                                                                            | 7 | All included                 | 7 | There is a single table describing the questions |
| Item 3                 | 7 | Title and abstract                                                                 | 7 | Gout in Portugal                                                                                                                                                    | 6 | . Subtract 1 for population  | 7 | Analysed from the text                           |
| Item 4                 | 5 | Methods section. The role of each member was not fully provided.                   | 5 | The development group members are not completely listed.                                                                                                            | 5 | Mentioned part of the member | 4 | No epidemiologist; no expertise                  |
| Item 5                 | 1 | Not provided.                                                                      | 1 | -6: Patients with gout are not involved in the development progress.                                                                                                | 2 | Literature review of values  | 1 | Not found                                        |
| Item 6                 | 1 | Not provided.                                                                      | 1 | -6: No description about target users.                                                                                                                              | 1 | Not mentioned                | 1 | Not found                                        |
| Item 7                 | 3 | Methods section. B), c) and d) not provided.                                       | 3 | Databases are named.<br>-1: No time period.<br>-1: No search terms.<br>-2: No full search strategy.                                                                 | 2 | Mentioned a                  | 3 | Without b) c) and d)                             |
| Item 8                 | 1 | No specific criterion provided.                                                    | 1 | -6: No description about selection criteria.                                                                                                                        | 1 | Not mentioned                | 6 | Methods and appendix                             |
| Item 9                 | 7 | Table 2. The Oxford Level of Evidence system.                                      | 7 | Oxford levels of evidence                                                                                                                                           | 6 | Table 2                      | 2 | The description is unclear                       |
| Item 10                | 3 | Methods section. Although Delphi approach was adopted, b) and c) were not provided | 3 | "discuss and vote"<br>-2: No outcomes.<br>-2: No influence.                                                                                                         | 5 | Missed outcome of vote       | 3 | Without b) and c)                                |
| Item 11                | 6 | Results section. Harms were not fully discussed (e.g., for allopurinol).           | 6 | Most informative example: recommendation 5.<br>-1: Not all recommendations reflect the consideration of benefits and harms. (e.g. Recommendation 1)                 | 4 | Mentioned ab                 | 6 | Every recommendation has                         |
| Item 12                | 7 | Methods and Results section. Evidences were summarized in table 1.                 | 7 | Methods.<br>Each recommendation has an evidence description.<br>Table 2 & 3.                                                                                        | 6 | All included                 | 7 | Each recommendation is linked to a key evidence  |
| Item 13                | 2 | Published in peer reviewed journal.                                                | 1 | -6: No description about external review.                                                                                                                           | 1 | Not mentioned                | 1 | Not found                                        |
| Item 14                | 1 | Not provided.                                                                      | 1 | -6: No statement about updating.                                                                                                                                    | 1 | Not mentioned                | 1 | Not found                                        |
| Item 15                | 5 | Results section. B) not provided.                                                  | 6 | Some purposes of recommendations are not clearly stated.                                                                                                            | 5 | Subtract 1                   | 6 | Well described                                   |



|                          |   |                                                                                                                                                                                                                                                                                                                                                |   |                                                                                                                                                                                                                                                                                                   |   |                                                                                       |   |                                                      |
|--------------------------|---|------------------------------------------------------------------------------------------------------------------------------------------------------------------------------------------------------------------------------------------------------------------------------------------------------------------------------------------------|---|---------------------------------------------------------------------------------------------------------------------------------------------------------------------------------------------------------------------------------------------------------------------------------------------------|---|---------------------------------------------------------------------------------------|---|------------------------------------------------------|
| Item 16                  | 6 | Results section. The appropriate population was not provided clearly in recommendations 4-6.                                                                                                                                                                                                                                                   | 7 | All points are included.                                                                                                                                                                                                                                                                          | 6 | All included                                                                          | 6 | Well described                                       |
| Item 17                  | 4 | Recommendations were summarized as table 2, but were not grouped in a certain section.                                                                                                                                                                                                                                                         | 4 | Table 2.<br>-3: recommendations are not grouped in the guideline.                                                                                                                                                                                                                                 | 4 | Missed b                                                                              | 4 | No summary                                           |
| Item 18                  | 4 | Table IV. Willingness of applying the guideline in daily practice was voted on and discussed.                                                                                                                                                                                                                                                  | 6 | "The impact of the recommendations was apparent through willingness to change the clinical practice"<br>-1: No influence                                                                                                                                                                          | 4 | Drug unavailable, and method                                                          | 4 | In the recommendation 1 last paragraph               |
| Item 19                  | 1 | Not provided.                                                                                                                                                                                                                                                                                                                                  | 1 | -6: No such information.                                                                                                                                                                                                                                                                          | 2 | Mentioned a                                                                           | 1 | Not found                                            |
| Item 20                  | 5 | Clinical question 5 and Recommendation 1. c) and d) not provided.                                                                                                                                                                                                                                                                              | 3 | Question 5.<br>-4: But the question about cost is not answered.                                                                                                                                                                                                                                   | 2 | Mentioned "What is the efficacy, cost efficacy and safety for urate-lowering therapy" | 1 | Not found                                            |
| Item 21                  | 1 | Not provided.                                                                                                                                                                                                                                                                                                                                  | 1 | -6: No such information.                                                                                                                                                                                                                                                                          | 5 | Not mentioned                                                                         | 1 | Not found                                            |
| Item 22                  | 1 | Not provided.                                                                                                                                                                                                                                                                                                                                  | 1 | -6: There's no such description about funding body.                                                                                                                                                                                                                                               | 1 | Not mentioned                                                                         | 1 | Not found                                            |
| Item 23                  | 1 | Not provided.                                                                                                                                                                                                                                                                                                                                  | 1 | -6: There's no such description about competing interests.                                                                                                                                                                                                                                        | 1 | Not mentioned                                                                         | 1 | Not found                                            |
| <b>ACP_2017 [19, 20]</b> |   |                                                                                                                                                                                                                                                                                                                                                |   |                                                                                                                                                                                                                                                                                                   |   |                                                                                       |   |                                                      |
| Item 1                   | 6 | Section - Guideline focus and target population. B) was only provided as epidemiological information.                                                                                                                                                                                                                                          | 6 | To provide guidance on diagnosing acute gout in patients with gout symptoms, including joint inflammation & "to provide guidance on the management of acute and recurrent gout in adults".<br>-1: the epidemiology is provided, but there's no specific statement of expected benefit or outcome. | 6 | Not mentioned b, but mentioned the epi                                                | 6 | The outcome and benefit don't be mentioned           |
| Item 2                   | 7 | Appendix                                                                                                                                                                                                                                                                                                                                       | 7 | Appendix Key questions.                                                                                                                                                                                                                                                                           | 7 | All included                                                                          | 6 | Analysed from the paragraph, but it not easy to find |
| Item 3                   | 7 | Abstracts.                                                                                                                                                                                                                                                                                                                                     | 7 | Adults with joint inflammation suspected to be gout & "adults with acute or recurrent gout"                                                                                                                                                                                                       | 7 | No subtract                                                                           | 7 | Well described                                       |
| Item 4                   | 6 | The first page and online ( <a href="http://annals.org/aim/article/2578528/management-acute-recurrent-gout-clinical-practice-guideline-from-american-college">http://annals.org/aim/article/2578528/management-acute-recurrent-gout-clinical-practice-guideline-from-american-college</a> ). The disciplines of each author were not provided. | 6 | Easy to find.<br>Statistical expertise: a. Qaseem.<br>-1: the discipline of each member is not provided.                                                                                                                                                                                          | 6 | Online                                                                                | 7 | At the end of the text                               |
| Item 5                   | 5 | Reference (PMID: 20679562). C) was not provided.                                                                                                                                                                                                                                                                                               | 5 | The method is described in reference [10].<br>-2: The outcomes are not shown.                                                                                                                                                                                                                     | 6 | Contained abcd in methods                                                             | 5 | In the appendix                                      |

|         |   |                                                                                                                      |   |                                                                                                                                                                                            |   |                                                              |   |                                                           |
|---------|---|----------------------------------------------------------------------------------------------------------------------|---|--------------------------------------------------------------------------------------------------------------------------------------------------------------------------------------------|---|--------------------------------------------------------------|---|-----------------------------------------------------------|
| Item 6  | 4 | Appendix - Target audience. B) was not provided.                                                                     | 4 | "All clinicians".<br>-3: no description of how the guideline may be used by its target audience.                                                                                           | 3 | Missed b                                                     | 6 | Can be found in the Target population part but without b) |
| Item 7  | 7 | Reference (https://ahrq-ehc-application.s3.amazonaws.com/media/pdf/gout_research.pdf), Methods section.              | 7 | The details are in reference [8].                                                                                                                                                          | 6 | Mentioned in Search Strategy                                 | 7 | In the method part and in the appendix                    |
| Item 8  | 7 | Reference (https://ahrq-ehc-application.s3.amazonaws.com/media/pdf/gout_research.pdf), Methods section.              | 7 | Appendix & methods.                                                                                                                                                                        | 6 | All included in APPENDIX: DETAILEDMETHODS                    | 7 | In the method part and in the appendix                    |
| Item 9  | 7 | Section - Methods. The GRADE approach was adopted.                                                                   | 7 | Methods and Appendix Quality assessment.                                                                                                                                                   | 6 | Contained a b1 3 4 5                                         | 6 | The table, but the details are not clear                  |
| Item 10 | 5 | Reference (PMID: 20679562). B) was not provided.                                                                     | 5 | The detailed methods are in reference [10].<br>-2: the outcomes are not provided.                                                                                                          | 6 | Grading the Evidence and Developing Recommendations and vote | 4 | In the method part and in the appendix                    |
| Item 11 | 7 | Pages 59-65 (Guideline: Management of Acute and Recurrent Gout).                                                     | 7 | Benefits and Harms and their supporting data are listed in specific sections.                                                                                                              | 6 | Subtract 1                                                   | 6 | Well described                                            |
| Item 12 | 5 | Pages 59-65 (Guideline: Management of Acute and Recurrent Gout) and Reference (PMID: 20679562). C) was not provided. | 5 | -2: how the guideline development group linked and used the evidence to inform recommendations is not described.                                                                           | 5 | Subtract 1                                                   | 6 | Can be found in the methods                               |
| Item 13 | 5 | Sections - Methods and Peer review and Reference (PMID: 20679562). A and d) were not provided.                       | 5 | Appendix peer review.<br>-1: outcomes are not described.<br>-1: no purpose provided.                                                                                                       | 4 | Peer Review abe                                              | 5 | Peer review                                               |
| Item 14 | 5 | Appendix - Note and Reference (PMID: 20679562). B) was not provided.                                                 | 4 | The content of updating is in reference [10].<br>-2: the time interval is not stated.<br>-1: no statement about updating in the guideline itself, so the information is very hard to find. | 5 | Missed c                                                     | 6 | In the note                                               |
| Item 15 | 5 | Pages 59-65 (Guideline: Management of Acute and Recurrent Gout). B) was not provided.                                | 6 | -1: not all recommendations provide purpose (e.g. Recommendation 4)                                                                                                                        | 5 | Subtract 1                                                   | 5 | No b)                                                     |
| Item 16 | 7 | Pages 59-65 (Guideline: Management of Acute and Recurrent Gout).                                                     | 7 | The different options for management of the condition or health issue are clearly presented.                                                                                               | 6 | All included                                                 | 7 | Well described                                            |
| Item 17 | 7 | Pages 59-65 (Guideline: Management of Acute and Recurrent Gout).                                                     | 7 | E.g. Figures.<br>Specific recommendations are grouped (e.g. Diagnosis & management)                                                                                                        | 6 | All included                                                 | 6 | A figure                                                  |

|                          |   |                                                                                                                                                                                                                                                                                                                           |   |                                                                                                                                                                                                                                              |   |                                                                                   |   |                                                                                                     |
|--------------------------|---|---------------------------------------------------------------------------------------------------------------------------------------------------------------------------------------------------------------------------------------------------------------------------------------------------------------------------|---|----------------------------------------------------------------------------------------------------------------------------------------------------------------------------------------------------------------------------------------------|---|-----------------------------------------------------------------------------------|---|-----------------------------------------------------------------------------------------------------|
| Item 18                  | 2 | Page 55 (Guideline: Diagnosis of Acute Gout). The difficulty to perform synovial fluid analysis in primary care was stated.                                                                                                                                                                                               | 4 | Summary of diagnosis , bout synovial fluid analysis.<br>-2: Method by which the information was sought is not described.<br>-1: They are not about the barriers or facilitators of the whole guideline.                                      | 2 | Mentioned a                                                                       | 2 | Not found                                                                                           |
| Item 19                  | 2 | A summary for patients was provided online ( <a href="http://annals.org/aim/article/2584392/diagnosis-management-gout-clinical-practice-guidelines-from-american-college-physicians">http://annals.org/aim/article/2584392/diagnosis-management-gout-clinical-practice-guidelines-from-american-college-physicians</a> ). | 3 | The summary figures.<br>-1: the summary figures include a clinical consideration part, but there's no specific implementation section in the guideline.<br>-3: No other information about implementation advice or tools for this guideline. | 1 | Not mentioned                                                                     | 1 | Not found                                                                                           |
| Item 20                  | 4 | Page 59 (Guideline: Management of Acute and Recurrent Gout). A) and d) were not provided.                                                                                                                                                                                                                                 | 7 | Management Table 1. & recommendation1 & recommendation 4. & High-value Care.                                                                                                                                                                 | 5 | Tables contained;high value part                                                  | 5 | It mentions cost in the part of management                                                          |
| Item 21                  | 1 | Not provided.                                                                                                                                                                                                                                                                                                             | 1 | -6: No description of monitoring or auditing.                                                                                                                                                                                                | 1 | Not mentioned                                                                     | 1 | Not found                                                                                           |
| Item 22                  | 4 | Appendix - Financial support. B) was not provided.                                                                                                                                                                                                                                                                        | 4 | Financial Support.<br>-3: No statement that the funding body did not influence the content of the guideline.                                                                                                                                 | 4 | No statement that the funding body did not influence the content of the guideline | 4 | No statement                                                                                        |
| Item 23                  | 7 | Appendix - Disclosures of the guideline document and the Conflict of Interests section of Reference (PMID: 20679562).                                                                                                                                                                                                     | 7 | Disclosures.<br>Clear and detailed.                                                                                                                                                                                                          | 6 | All included                                                                      | 6 | Well described                                                                                      |
| <b>ACR_2012 [14, 15]</b> |   |                                                                                                                                                                                                                                                                                                                           |   |                                                                                                                                                                                                                                              |   |                                                                                   |   |                                                                                                     |
| Item 1                   | 6 | Guideline part 1. Page 1443. This content was not easy to find.                                                                                                                                                                                                                                                           | 6 | All included, but difficult to find.                                                                                                                                                                                                         | 7 | All included                                                                      | 7 | Well described                                                                                      |
| Item 2                   | 5 | Guideline part 1. Page 1434. Multiple clinical questions were presented but not listed in the guideline.                                                                                                                                                                                                                  | 7 | Scenarios are clearly described.                                                                                                                                                                                                             | 5 | Contained "ab"                                                                    | 5 | There were multiple questions of interest and alternative options presented for each case scenario. |
| Item 3                   | 7 | Titles.                                                                                                                                                                                                                                                                                                                   | 7 | Gout                                                                                                                                                                                                                                         | 7 | All included                                                                      | 5 | The description is unclear                                                                          |
| Item 4                   | 7 | Guideline part 1. Pages 1431, 1434, 1444.                                                                                                                                                                                                                                                                                 | 7 | Clearly stated. An experienced librarian is included.                                                                                                                                                                                        | 7 | All included                                                                      | 7 | Well described                                                                                      |
| Item 5                   | 5 | Guideline part 1. Page 1434. A patient representative participated in the task force. C) was not provided.                                                                                                                                                                                                                | 7 | 2 patient representatives are included in the task force.                                                                                                                                                                                    | 5 | Not mentioned "participation in the literature review of values and preferences"  | 4 | It involves but is unclear                                                                          |
| Item 6                   | 7 | Guideline part 1. Page 1433.                                                                                                                                                                                                                                                                                              | 4 | Intended audience are discribed.P1433.                                                                                                                                                                                                       | 7 | All included                                                                      | 4 | Analysed from the article                                                                           |

|         |   |                                                                                                                          |   |                                                                                                                  |   |                                                               |                                                          |
|---------|---|--------------------------------------------------------------------------------------------------------------------------|---|------------------------------------------------------------------------------------------------------------------|---|---------------------------------------------------------------|----------------------------------------------------------|
|         |   |                                                                                                                          |   | -3: no description of how to use.                                                                                |   |                                                               |                                                          |
| Item 7  | 7 | Guideline part 1. Page 1434 and Appendix A.                                                                              | 7 | Figure 4 & appendix a.                                                                                           | 7 | All included                                                  | 7 Well described                                         |
| Item 8  | 7 | Guideline part 1. Page 1434 and Appendix A.                                                                              | 7 | P1434 & appendix a.                                                                                              | 7 | All included                                                  | 7 Well described                                         |
| Item 9  | 6 | Guideline part 1. Page 1434. Evidence levels were graded only based on b1) and b5).                                      | 7 | Materials and methods                                                                                            | 7 | All included                                                  | 7 Well described                                         |
| Item 10 | 6 | Guideline part 1. Page 1435. Some outcomes were not provided.                                                            | 6 | Clearly described.<br>-1: one example of outcome is provided, but other outcomes are not provided.               | 6 | All included                                                  | 6 Well described                                         |
| Item 11 | 6 | Results section. Some recommendations (e.g., diet on page 1438) did not consider harms.                                  | 6 | Most recommendations reflect the consideration of benefits and harms.<br>-1: not all recommendations, e.g. Diet. | 5 | Subtract 1                                                    | 6 Not every recommendation has                           |
| Item 12 | 5 | Results section. C) was not provided.                                                                                    | 5 | Evidence summaries or tables are not provided.                                                                   | 7 | All included                                                  | 7 Well described                                         |
| Item 13 | 2 | This guideline was published in a peer-reviewed journal.                                                                 | 2 | Revised before publication<br>-5: no other details.                                                              | 1 | Not mentioned                                                 | 1 Not found                                              |
| Item 14 | 3 | Guideline part 1. Pages 1431. It was only stated that the guideline organization will periodically revise the guideline. | 3 | Is "subject to periodic revision".<br>-4: no other detail                                                        | 3 | To be updated but without details                             | 4 The information is unclear                             |
| Item 15 | 5 | Results section. B) was not provided.                                                                                    | 6 | -1: some purposes are not provided.                                                                              | 5 | Subtract 1                                                    | 7 Well described                                         |
| Item 16 | 7 | Results section.                                                                                                         | 7 | All points are included.                                                                                         | 7 | All included                                                  | 7 Well described                                         |
| Item 17 | 4 | An algorithm was provided on page 1437, but the recommendations were not grouped in a certain section.                   | 7 | There are summary tables and they are grouped.                                                                   | 7 | All included                                                  | 4 No summary                                             |
| Item 18 | 1 | Not provided.                                                                                                            | 1 | Not provided.                                                                                                    | 1 | Not mentioned                                                 | 1 It mentions but don't discuss cause of the methodology |
| Item 19 | 1 | Not provided.                                                                                                            | 1 | Not provided.                                                                                                    | 1 | Not mentioned                                                 | 1 Not found                                              |
| Item 20 | 1 | Not provided.                                                                                                            | 1 | Costs are not considered when forming the recommendations.                                                       | 1 | Not mentioned                                                 | 1 Not mentioned                                          |
| Item 21 | 1 | Not provided.                                                                                                            | 1 | Not provided.                                                                                                    | 2 | Mentioned a                                                   | 1 Not found                                              |
| Item 22 | 3 | Guideline part 1. Page 1432. B) was not provided.                                                                        | 4 | -3: no statement that the funding body did not influence the content of the guideline                            | 3 | Mentioned "The name of the funding body or source of funding" | 3 No b)                                                  |
| Item 23 | 4 | Guideline part 1. Page 1434. Conflict of interest was mentioned but no detail was                                        | 4 | -1: no method.<br>-2: no influence                                                                               | 4 | No detail                                                     | 5 The TFP had a majority of members                      |

|                            |   |                                                                                                                      |   |                                                                                                                                                                                                                                                                                                                                                |   |                                                                     |                                                    |                                                    |
|----------------------------|---|----------------------------------------------------------------------------------------------------------------------|---|------------------------------------------------------------------------------------------------------------------------------------------------------------------------------------------------------------------------------------------------------------------------------------------------------------------------------------------------|---|---------------------------------------------------------------------|----------------------------------------------------|----------------------------------------------------|
|                            |   | given.                                                                                                               |   |                                                                                                                                                                                                                                                                                                                                                |   |                                                                     | without a perceived potential conflict of interest |                                                    |
| <b>ACR_EULAR_2015 [42]</b> |   |                                                                                                                      |   |                                                                                                                                                                                                                                                                                                                                                |   |                                                                     |                                                    |                                                    |
| Item 1                     | 6 | Abstract and Introduction section. b) was provided as epidemiological information. Information was not easy to find. | 6 | "The current effort was undertaken to develop new classification criteria for gout" & "to address these issues" & "this classification criteria set will enable a standardised approach to identifying a relatively homogeneous group of individuals who have the clinical entity of gout for enrolment into studies"<br>-1: not easy to find. | 7 | All included                                                        | 7                                                  | In the objective part and introduction             |
| Item 2                     | 5 | Abstract. D) and e) were not provided.                                                                               | 5 | "Factors to discriminate gout from other rheumatic diseases"<br>-2: there is an topic, but it's not clearly stated.                                                                                                                                                                                                                            | 5 | Contained "ab"                                                      | 5                                                  | Analyse from the summary and recommends            |
| Item 3                     | 7 | Abstract.                                                                                                            | 7 | Gout.                                                                                                                                                                                                                                                                                                                                          | 7 | All included                                                        | 7                                                  | Analyse from the text                              |
| Item 4                     | 6 | Pages 1789, 1791, 1797. Disciplines were not provided.                                                               | 5 | Easy to find.<br>An epidemiologist involved.<br>-1: no discipline of each member.<br>-1: the relationship of authors and the expert panel is unknown.                                                                                                                                                                                          | 5 | Mentioned ab                                                        | 5                                                  | No expertise or a description of the member's role |
| Item 5                     | 6 | Page 1790. A patient participated in phase 1.                                                                        | 6 | Patients with gout were involved in phase 1.<br>Reference 20<br>-1: not easy to find.                                                                                                                                                                                                                                                          | 6 | Included in "method"                                                | 1                                                  | Not found                                          |
| Item 6                     | 2 | Inferred from abstract. But the item was not clearly stated throughout the paper.                                    | 1 | -6: not mentioned.                                                                                                                                                                                                                                                                                                                             | 2 | Description of how the guideline may be used by its target audience | 3                                                  | Without clear description                          |
| Item 7                     | 7 | Reference (PMID: 24915980)                                                                                           | 7 | Reference 23.                                                                                                                                                                                                                                                                                                                                  | 7 | All included                                                        | 7                                                  | Well described                                     |
| Item 8                     | 7 | Reference (PMID: 24915980)                                                                                           | 7 | Reference 23.                                                                                                                                                                                                                                                                                                                                  | 7 | All included                                                        | 6                                                  | The description of criteria is not that clear      |
| Item 9                     | 7 | Reference 20. QUADAS tool was used.                                                                                  | 6 | QUADAS<br>-1: QUADAS has been revised into QUADAS-2, but they still used the old version.                                                                                                                                                                                                                                                      | 7 | All included                                                        | 1                                                  | Not found                                          |
| Item 10                    | 7 | Methods section.                                                                                                     | 6 | Clearly described in "methods" part.<br>-1: Some outcomes are provided ( Table 1). But some are not ( the vote of the willingness).                                                                                                                                                                                                            | 6 | All included                                                        | 5                                                  | Not clear                                          |
| Item 11                    | 7 | Not applicable.                                                                                                      | 7 | As a diagnostic guideline, it did consider the specificity and sensitivity.                                                                                                                                                                                                                                                                    | 7 | All included                                                        | 7                                                  | This item is not apply to this guideline           |
| Item 12                    | 5 | Results section. C) was not provided.                                                                                | 5 | Evidences are described in reference 23, thought how a specific evidence is linked to a recommendation is not described in detail.                                                                                                                                                                                                             | 5 | Supporting data                                                     | 7                                                  | Recommendation has certain link                    |

|               |   |                                                                                         |   |                                                                                                                                                                                                                                                                                                                                                                                                                           |   |                                                                                    |   |                                                                                                                                                                                                |
|---------------|---|-----------------------------------------------------------------------------------------|---|---------------------------------------------------------------------------------------------------------------------------------------------------------------------------------------------------------------------------------------------------------------------------------------------------------------------------------------------------------------------------------------------------------------------------|---|------------------------------------------------------------------------------------|---|------------------------------------------------------------------------------------------------------------------------------------------------------------------------------------------------|
| Item 13       | 2 | Page 1797. Detailed external peer review information was not given.                     | 2 | "Externally peer reviewed".<br>-5: no any other information about the external peer review.                                                                                                                                                                                                                                                                                                                               | 2 | Some recommendations meet criterion                                                | 1 | Not found                                                                                                                                                                                      |
| Item 14       | 3 | Page 1789. B) and c) were not provided.                                                 | 3 | "All ACR/EULAR approved criteria sets are expected to undergo intermittent updates."<br>-2: no time interval.<br>-2: no methodology.                                                                                                                                                                                                                                                                                      | 3 | Externally peer reviewed.                                                          | 3 | Although it has description of update, it is not clear                                                                                                                                         |
| Item 15       | 7 | Results section.                                                                        | 7 | Very specific and unambiguous.                                                                                                                                                                                                                                                                                                                                                                                            | 7 | All included                                                                       | 6 | Well described                                                                                                                                                                                 |
| Item 16       | 7 | Not applicable.                                                                         | 7 | Details of each domain are clearly described.                                                                                                                                                                                                                                                                                                                                                                             | 7 | All included                                                                       | 7 | Well described                                                                                                                                                                                 |
| Item 17       | 7 | Table 2 and abstract.                                                                   | 7 | Table 2.<br>There's no need to group.                                                                                                                                                                                                                                                                                                                                                                                     | 7 | All included                                                                       | 7 | Well described                                                                                                                                                                                 |
| Item 18       | 3 | Page 1796. Clinicians' access to imaging was discussed. A) and b) were not provided.    | 5 | "We also realised that some investigators may not have access to imaging and therefore aimed to develop criteria that would still perform well in the absence of imaging data. In the discrete-choice experiments, the lack of imaging data was weighted the same as for studies performed with negative results, supporting the validity of using the scoring system in the absence of imaging data."<br>-2: no methods. | 3 | Mentioned the facilitator in page 1791                                             | 4 | In the article" We also realised that some investigators may not have access to imaging and therefore aimed to develop criteria that would still perform well in the absence of imaging data." |
| Item 19       | 3 | Pilot test was conducted (table 3) and a web-based calculator was provided (page 1794). | 7 | "Results of testing of the new gout classification criteria and comparison with existing published criteria" part.<br>"A web-based calculator can be accessed at <a href="http://goutclassificationcalculator.auckland.ac.nz">http://goutclassificationcalculator.auckland.ac.nz</a> , as well as through the ACR and EULAR websites".                                                                                    | 3 | Gout classification calculator web page.                                           | 3 | Page 1794 has a tool                                                                                                                                                                           |
| Item 20       | 1 | Not provided.                                                                           | 1 | -6: not mentioned.                                                                                                                                                                                                                                                                                                                                                                                                        | 1 | Not mentioned                                                                      | 4 | General population survey to determine the public health burden of gout for resource planning                                                                                                  |
| Item 21       | 1 | Not provided.                                                                           | 1 | -6: not mentioned.                                                                                                                                                                                                                                                                                                                                                                                                        | 1 | Not mentioned                                                                      | 1 | Not found                                                                                                                                                                                      |
| Item 22       | 4 | Page 1797. B) was not provided.                                                         | 4 | "Funding" part.<br>-3: no statement of influence.                                                                                                                                                                                                                                                                                                                                                                         | 3 | Not mentioned that the funding body did not influence the content of the guideline | 4 | No statement                                                                                                                                                                                   |
| Item 23       | 4 | Page 1797. B) and d) were not provided.                                                 | 4 | "Competing interest" part.<br>-1: not method.<br>-2: no description of influence.                                                                                                                                                                                                                                                                                                                                         | 4 | Missed d                                                                           | 5 | No statement                                                                                                                                                                                   |
| BSR_2017 [21] |   |                                                                                         |   |                                                                                                                                                                                                                                                                                                                                                                                                                           |   |                                                                                    |   |                                                                                                                                                                                                |

|         |   |                                                                                                                         |   |                                                                                                                                                                                                                                              |   |                                                                                        |   |                         |
|---------|---|-------------------------------------------------------------------------------------------------------------------------|---|----------------------------------------------------------------------------------------------------------------------------------------------------------------------------------------------------------------------------------------------|---|----------------------------------------------------------------------------------------|---|-------------------------|
| Item 1  | 7 | Sections 1) Scope and purpose and 2) Objective.                                                                         | 7 | Well written & easy to find. Clearly stated in "Need to revise" & "Objective" parts.                                                                                                                                                         | 7 | All included                                                                           | 7 | Well described          |
| Item 2  | 7 | Table 1. Principal clinical questions were listed.                                                                      | 7 | Table 1.<br>Well written & easy to find.                                                                                                                                                                                                     | 7 | All included                                                                           | 7 | Well described          |
| Item 3  | 7 | Section Objective - Gout in the UK.                                                                                     | 7 | "gout in the UK" in "Objective" part. Easy to find.                                                                                                                                                                                          | 7 | All included                                                                           | 7 | Well described          |
| Item 4  | 6 | Section Objective - Stakeholder involvement. The role of each member was not provided.                                  | 6 | Clear and easy to find. An epidemiologist (W.Z.) was involved in the development group.<br>-1: No description of each member's role.                                                                                                         | 4 | Mentioned "The guideline development group" and the name, discipline/content expertise | 6 | No roles                |
| Item 5  | 5 | Section Objective - Stakeholder involvement. Two lay patients involved in the guideline development group.              | 5 | Two patients (H.F. & A.P.) participated in the development group.<br>Recommendations were based on "patients experience" ( in Rationales of many recommendations).<br>-2: the outcomes/information gathered from patients were not provided. | 5 | Participation in the guideline development group,                                      | 6 | 2 patients took part in |
| Item 6  | 7 | Section Objective - Target audience.                                                                                    | 7 | "Target audience" part in "Objective".<br>Well written & easy to find.                                                                                                                                                                       | 6 | All included                                                                           | 7 | Well described          |
| Item 7  | 7 | Section Rigour of development - Systematic literature search. Search strategies were provided as Supplementary table 1. | 7 | "Systematic literature search" of "Rigour of development" part & Table S1.<br>Well written & easy to find.                                                                                                                                   | 7 | All included                                                                           | 7 | Well described          |
| Item 8  | 6 | Section Rigour of development - Inclusion criteria & Exclusion criteria. A) was not provided.                           | 6 | "Inclusion criteria" & "Exclusion criteria" of "Rigour of development" part.<br>Easy to find.<br>-1: target population characteristics were not included in the criteria.                                                                    | 7 | All included                                                                           | 5 | No a2)                  |
| Item 9  | 6 | Section Rigour of development - Level of evidence. Only study design was considered.                                    | 6 | "Level of evidence" part clearly stated the method used to evaluate evidence strengths and limitations.<br>-1: the method considered two aspects, study design & methodology limitations.                                                    | 7 | All included                                                                           | 7 | Well described          |
| Item 10 | 7 | Section Rigour of development - Delphi exercise to generate consensus recommendations.                                  | 6 | Easy to find in "Delphi exercise to generate consensus recommendations" part.<br>-1: No detail of outcomes of the development process ( vote for the first draft, final vote for each recommendation)                                        | 7 | All included                                                                           | 7 | Well described          |
| Item 11 | 6 | Section Recommendations.                                                                                                | 7 | Most informative example: recommendation iii.                                                                                                                                                                                                | 5 | Subtract 1                                                                             | 7 | Well described          |

|         |   |                                                                                                                                                                                                                                                                                                                                                                              |   |                                                                                                                                                                                                                                                                                                                                                                                                                                                                                                                                                 |   |                                                                                                                                                                                   |   |                                                                                      |
|---------|---|------------------------------------------------------------------------------------------------------------------------------------------------------------------------------------------------------------------------------------------------------------------------------------------------------------------------------------------------------------------------------|---|-------------------------------------------------------------------------------------------------------------------------------------------------------------------------------------------------------------------------------------------------------------------------------------------------------------------------------------------------------------------------------------------------------------------------------------------------------------------------------------------------------------------------------------------------|---|-----------------------------------------------------------------------------------------------------------------------------------------------------------------------------------|---|--------------------------------------------------------------------------------------|
| Item 12 | 6 | Evidence summary table was not provided.                                                                                                                                                                                                                                                                                                                                     | 5 | -2: no evidence summary or evidence table provided.                                                                                                                                                                                                                                                                                                                                                                                                                                                                                             | 6 | All included                                                                                                                                                                      | 7 | Well described                                                                       |
| Item 13 | 5 | Section Objective - Stakeholder involvement. A) and d) were not provided.                                                                                                                                                                                                                                                                                                    | 5 | 1 ) The draft guideline was presented and discussed in open session by a multidisciplinary audience at the annual scientific meetings of the BSR in 2014 and 2016.<br>2 ) This guideline has been reviewed and endorsed by the Royal College of General Practitioners.<br>-1 : No objective or intent of external review.<br>-1: no outcomes/information gathered from the external review.                                                                                                                                                     | 5 | Externally peer reviewed.                                                                                                                                                         | 5 | There's an external review but no details                                            |
| Item 14 | 2 | Online information:<br><a href="https://www.rheumatology.org.uk/Knowledge/Excellence/Guidelines/ArtMID/1256/ArticleID/18">https://www.rheumatology.org.uk/Knowledge/Excellence/Guidelines/ArtMID/1256/ArticleID/18</a> . This content was very difficult to be found.                                                                                                        | 2 | Time: 2020<br>( <a href="https://www.rheumatology.org.uk/Knowledge/Excellence/Guidelines/artmid/1256/articleid/18">https://www.rheumatology.org.uk/Knowledge/Excellence/Guidelines/artmid/1256/articleid/18</a> ).<br>-5: No information about updating in the guideline itself, very difficult to find on the website.                                                                                                                                                                                                                         | 1 | Not mentioned                                                                                                                                                                     | 3 | Not easy to be found and unclear                                                     |
| Item 15 | 7 | Section Recommendations.                                                                                                                                                                                                                                                                                                                                                     | 7 | Recommendations are specific and unambiguous. Example: recommendation iii.<br>The uncertainty is explicitly stated. Purposes of recommended actions are clear. The relevant population is clear. The qualifying statements are clear.                                                                                                                                                                                                                                                                                                           | 6 | Subtract 1                                                                                                                                                                        | 7 | Well described                                                                       |
| Item 16 | 7 | Section Recommendations.                                                                                                                                                                                                                                                                                                                                                     | 7 | Description of options & description of population or clinical situation most appropriate to each option are clear. Example: recommendation iv.                                                                                                                                                                                                                                                                                                                                                                                                 | 6 | All included                                                                                                                                                                      | 7 | Well described                                                                       |
| Item 17 | 4 | Figure 1. B) was not provided.                                                                                                                                                                                                                                                                                                                                               | 3 | Fig 1.<br>-3: recommendations are not grouped in the guideline.                                                                                                                                                                                                                                                                                                                                                                                                                                                                                 | 3 | Not grouped                                                                                                                                                                       | 4 | No b)                                                                                |
| Item 18 | 5 | Section Applicability and utility - Statement of potential organizational barriers to introduction. B) was not provided.                                                                                                                                                                                                                                                     | 5 | "Statement of potential organizational barriers to introduction" part & recommendation vi. Easy to find.<br>-2: Methods by which the information was sought are not provided.                                                                                                                                                                                                                                                                                                                                                                   | 4 | Identification of the types of facilitators and barriers that were considered;<br>Information/description of the types of facilitators and barriers that emerged from the inquiry | 5 | In "Statement of potential organizational barriers to introduction" part             |
| Item 19 | 4 | An algorithm (figure 1) and an executive summary was available<br>( <a href="https://academic.oup.com/rheumatology/article/56/7/1056/3855178/The-British-Society-for-Rheumatology-Guideline-for?searchresult=1">https://academic.oup.com/rheumatology/article/56/7/1056/3855178/The-British-Society-for-Rheumatology-Guideline-for?searchresult=1</a> ). C) was not provided | 5 | 1)"Applicability and utility" section is about implementation.<br>2)There is a summary of the guideline on the website, but not mentioned in the guideline itself and not easy to find.<br>( <a href="https://academic.oup.com/rheumatology/article/56/7/1056/3855178/The-British-Society-for-Rheumatology-Guideline-for?searchresult=1">https://academic.oup.com/rheumatology/article/56/7/1056/3855178/The-British-Society-for-Rheumatology-Guideline-for?searchresult=1</a> ) .<br>3)solutions to barriers: "Potential cost implications for | 5 | No summary                                                                                                                                                                        | 5 | "An audit tool is available on the website of the British Society for Rheumatology." |



|                       |   |                                                                                                                                                                                                                                                                                                            |   |                                                                                                                                                                                                                                                                                                                                                                                                 |   |                                                                                               |                                                                             |
|-----------------------|---|------------------------------------------------------------------------------------------------------------------------------------------------------------------------------------------------------------------------------------------------------------------------------------------------------------|---|-------------------------------------------------------------------------------------------------------------------------------------------------------------------------------------------------------------------------------------------------------------------------------------------------------------------------------------------------------------------------------------------------|---|-----------------------------------------------------------------------------------------------|-----------------------------------------------------------------------------|
|                       |   |                                                                                                                                                                                                                                                                                                            |   | implementation of the guideline" talks about the solution to unlicensed drugs.<br>-2: No direction on how to access the summary.                                                                                                                                                                                                                                                                |   |                                                                                               |                                                                             |
| Item 20               | 7 | Section Applicability and utility - Potential cost implications for implementation of the guideline.                                                                                                                                                                                                       | 7 | "Potential cost implications for implementation of the guideline" part.                                                                                                                                                                                                                                                                                                                         | 6 | All included                                                                                  | 6 It mentions cost                                                          |
| Item 21               | 2 | An audit tool was available ( <a href="https://www.rheumatology.org.uk/Knowledge/Excellence/Guidelines/ArtMID/1262/ArticleID/166/Guideline-on-the-management-of-gout">https://www.rheumatology.org.uk/Knowledge/Excellence/Guidelines/ArtMID/1262/ArticleID/166/Guideline-on-the-management-of-gout</a> ). | 5 | Audit tool:<br><a href="https://www.rheumatology.org.uk/Knowledge/Excellence/Guidelines/artmid/1262/articleid/166/Guideline-on-the-management-of-gout">https://www.rheumatology.org.uk/Knowledge/Excellence/Guidelines/artmid/1262/articleid/166/Guideline-on-the-management-of-gout</a> .<br>-1: No link to the audit tool in the guideline.<br>-1: no advice on the frequency of measurement. | 2 | Identification of criteria to assess guideline implementation or adherence to recommendations | 2 Audit tool available                                                      |
| Item 22               | 7 | Section Objective - Stakeholder involvement & Funding.                                                                                                                                                                                                                                                     | 7 | "Stakeholder involvement" part & "funding" part at the end.<br>Clear and easy to find.                                                                                                                                                                                                                                                                                                          | 7 | All included                                                                                  | 7 Well described                                                            |
| Item 23               | 5 | Section Objective - Stakeholder involvement & Disclosure statement. D) was not provided.                                                                                                                                                                                                                   | 5 | "stakeholder involvement" part & "Disclosure statement" part.<br>Clear and easy to find.<br>-2: No clear description of how the competing interests influenced the guideline.                                                                                                                                                                                                                   | 5 | Influence not provided                                                                        | 5 No influence                                                              |
| <b>CCCP_2012 [47]</b> |   |                                                                                                                                                                                                                                                                                                            |   |                                                                                                                                                                                                                                                                                                                                                                                                 |   |                                                                                               |                                                                             |
| Item 1                | 6 | Page 49, Title and Section 1 - Epidemiology. B) was only provided as epidemiological information.                                                                                                                                                                                                          | 7 | Well written & easy to find.                                                                                                                                                                                                                                                                                                                                                                    | 7 | All included                                                                                  | 7 Well described                                                            |
| Item 2                | 3 | Clinical questions can be inferred from the guideline but not clearly stated.                                                                                                                                                                                                                              | 3 | The topic can only be inferred from the content.                                                                                                                                                                                                                                                                                                                                                | 3 | Clinical questions was not clearly stated.                                                    | 3 Analysed from the article but the questions don't be explicitly mentioned |
| Item 3                | 7 | Title.                                                                                                                                                                                                                                                                                                     | 7 | Asymptomatic HA with CAD                                                                                                                                                                                                                                                                                                                                                                        | 7 | All included                                                                                  | 7 Well described                                                            |
| Item 4                | 2 | Page 49. Only the name of the guideline development group was provided.                                                                                                                                                                                                                                    | 2 | The names of development groups are provided.<br>-5: no any other information about group membership.                                                                                                                                                                                                                                                                                           | 2 | Not mentioned the members' detail                                                             | 2 Only development group and names are given                                |
| Item 5                | 1 | Not provided.                                                                                                                                                                                                                                                                                              | 1 | -6: not mentioned.                                                                                                                                                                                                                                                                                                                                                                              | 1 | Not mentioned                                                                                 | 1 Not found                                                                 |
| Item 6                | 2 | Introduction. The target user was not clearly stated throughout the paper.                                                                                                                                                                                                                                 | 1 | -6: not mentioned.                                                                                                                                                                                                                                                                                                                                                                              | 1 | Not mentioned                                                                                 | 3 Without clear description                                                 |
| Item 7                | 1 | Not provided.                                                                                                                                                                                                                                                                                              | 1 | -6: not mentioned.                                                                                                                                                                                                                                                                                                                                                                              | 1 | Not mentioned                                                                                 | 1 Not found                                                                 |
| Item 8                | 1 | Not provided.                                                                                                                                                                                                                                                                                              | 1 | -6: not mentioned.                                                                                                                                                                                                                                                                                                                                                                              | 1 | Not mentioned                                                                                 | 1 Not found                                                                 |
| Item 9                | 1 | Not provided.                                                                                                                                                                                                                                                                                              | 1 | -6: not mentioned.                                                                                                                                                                                                                                                                                                                                                                              | 1 | Not mentioned                                                                                 | 1 Not found                                                                 |
| Item 10               | 1 | Not provided.                                                                                                                                                                                                                                                                                              | 1 | -6: not mentioned.                                                                                                                                                                                                                                                                                                                                                                              | 1 | Not mentioned                                                                                 | 1 Not found                                                                 |

|                      |   |                                                                                                                |   |                                                                                                                                                                                                                                   |   |                                                          |   |                                                                       |
|----------------------|---|----------------------------------------------------------------------------------------------------------------|---|-----------------------------------------------------------------------------------------------------------------------------------------------------------------------------------------------------------------------------------|---|----------------------------------------------------------|---|-----------------------------------------------------------------------|
| Item 11              | 3 | Pages 52-54. Supporting data for benefits and harms were not provided.                                         | 4 | Most informative: page 53 benzbromarone.<br>-1: no supporting data for benefits.<br>-1: no supporting data for harms.<br>-1: not all recommendations reflect the consideration of benefits and harms.(page 52 life style change ) | 4 | Subtract 1                                               | 4 | Some recommends involve                                               |
| Item 12              | 1 | Not provided.                                                                                                  | 3 | -2: no description of how they linked and used the evidence.<br>-1: only some recommendations are linked to a key evidence description.<br>-1: page 52: 6. This part can only be considered as an incomplete evidence summary.    | 2 | Mentioned a                                              | 2 | Some recommends are linked evidence                                   |
| Item 13              | 2 | The guideline was published in a peer reviewed journal.                                                        | 1 | -6: not mentioned.                                                                                                                                                                                                                | 1 | Not mentioned                                            | 1 | Not found                                                             |
| Item 14              | 1 | Not provided.                                                                                                  | 1 | -6: not mentioned.                                                                                                                                                                                                                | 1 | Not mentioned                                            | 1 | Not found                                                             |
| Item 15              | 3 | Pages 52-54. A) and b) were not provided.                                                                      | 4 | -2: uncertainty is not stated.<br>-1: not all recommendations provide intent or purpose.                                                                                                                                          | 6 | Subtract 1                                               | 5 | Only some recommendations report                                      |
| Item 16              | 6 | Pages 52-54. Some options did not define proper population.                                                    | 5 | -1: only some options are provided with the most appropriate population or clinical situation (e.g. Alkalization fo urine is not.)<br>-1: some options are not provided with description (page 52 “ proper amount of wine”)       | 6 | Subtract 1                                               | 6 | Describe clearly                                                      |
| Item 17              | 4 | Pages 53-54. Recommendations were not grouped in a certain section.                                            | 4 | Figure 1.<br>-3: recommendations are not grouped.                                                                                                                                                                                 | 4 | Recommendations were not grouped together in one section | 4 | Specific recommendations don't be grouped together in one section     |
| Item 18              | 1 | Not provided.                                                                                                  | 1 | -6: not mentioned.                                                                                                                                                                                                                | 1 | Not mentioned                                            | 1 | Not found                                                             |
| Item 19              | 1 | Not provided.                                                                                                  | 1 | -6: not mentioned.                                                                                                                                                                                                                | 1 | Not mentioned                                            | 1 | Not found                                                             |
| Item 20              | 1 | Not provided.                                                                                                  | 1 | -6: not mentioned.                                                                                                                                                                                                                | 1 | Not mentioned                                            | 1 | Not found                                                             |
| Item 21              | 1 | Not provided.                                                                                                  | 1 | -6: not mentioned.                                                                                                                                                                                                                | 1 | Not mentioned                                            | 1 | Not found                                                             |
| Item 22              | 1 | Not provided.                                                                                                  | 1 | -6: not mentioned.                                                                                                                                                                                                                | 1 | Not mentioned                                            | 1 | Not found                                                             |
| Item 23              | 1 | Not provided.                                                                                                  | 1 | -6: not mentioned.                                                                                                                                                                                                                | 1 | Not mentioned                                            | 1 | Not found                                                             |
| <b>CRA_2016 [41]</b> |   |                                                                                                                |   |                                                                                                                                                                                                                                   |   |                                                          |   |                                                                       |
| Item 1               | 5 | Paragraph 3. B) was only provided as epidemiological information. Contents of this item were not easy to find. | 7 | Easy to find,                                                                                                                                                                                                                     | 7 | All included                                             | 6 | In the 2nd and 3rd paragraph, the health intent and epi. Can be found |
| Item 2               | 5 | Appendix 5. A set of clinical questions were selected but no detail was given.                                 | 5 | Methods in the Appendix. The details of the questions are not provided. There was some misunderstanding of this item. The scoring criteria were clarified after discussion.                                                       | 5 | Contained "ab"                                           | 5 | Analysed from the summary and recommends                              |

|         |   |                                                                                                                        |   |                                                                                                                                                                                                 |   |                                                                                       |   |                                                                                                     |
|---------|---|------------------------------------------------------------------------------------------------------------------------|---|-------------------------------------------------------------------------------------------------------------------------------------------------------------------------------------------------|---|---------------------------------------------------------------------------------------|---|-----------------------------------------------------------------------------------------------------|
| Item 3  | 7 | Paragraph 3 and Appendix 2.                                                                                            | 7 | Gout in China (supplementary)                                                                                                                                                                   | 7 | All included                                                                          | 7 | Analysed from the text                                                                              |
| Item 4  | 6 | Appendix. The role of each member was not provided.                                                                    | 6 | Clear & easy to find.<br>An methodologist is involved (Yaolong Chen (GRADE Chinese Centre)<br>-1: role of each member is not described.                                                         | 5 | Mentioned name and institution and performance                                        | 5 | The development group; name, institution, a description of the members' role and it is well-written |
| Item 5  | 1 | Not provided.                                                                                                          | 1 | '-6: The views and preferences of the target population are not mentioned.                                                                                                                      | 1 | Not mentioned                                                                         | 1 | Not found                                                                                           |
| Item 6  | 4 | Appendix 2. B) was not provided.                                                                                       | 5 | Easy to find.<br>'-2: how the guideline may be used is not complete.                                                                                                                            | 6 | Mentioned in abstract                                                                 | 6 | Can be found in the appendix                                                                        |
| Item 7  | 5 | Appendix 6. D) was not provided.                                                                                       | 4 | Supplementary.<br>Databases are named. Time periods are described.<br>-1: No search terms.<br>-2: No full search strategy.                                                                      | 5 | Mentioned                                                                             | 6 | Can be found in the appendix                                                                        |
| Item 8  | 3 | Appendix 6.                                                                                                            | 3 | The inclusion criteria only include study design.                                                                                                                                               | 3 | Mentioned study design                                                                | 4 | In the appendix, but not that clear                                                                 |
| Item 9  | 7 | Appendix 7. GRADE method.                                                                                              | 6 | Supplementary.<br>-1: The description is ambiguous. The evaluation methods described in the supplementary don't fit the levels of evidence that used in the recommendations                     | 6 | Amstar                                                                                | 6 | In the appendix the LOE is given, and in the recommends, the evidence level is clear.               |
| Item 10 | 3 | Appendix 8. Although the Delphi method was used, the outcome and the influence on guideline development was not given. | 4 | Supplementary.<br>-1: only name of the process, no description.<br>-2: outcomes are not provided.                                                                                               | 1 | Not mentioned                                                                         | 6 | In the appendix                                                                                     |
| Item 11 | 7 | Recommendations.                                                                                                       | 6 | Most informative example: recommendation 6&7.<br>-1: recommendation 9 ( benefits and harms with supporting data are provided, but the recommendation doesn't reflect the consideration of them) | 5 | Subtract 1                                                                            | 6 | Well described                                                                                      |
| Item 12 | 5 | Recommendations and Appendix 8. C) was not provided.                                                                   | 5 | -2: No evidence summary or table.                                                                                                                                                               | 6 | All included                                                                          | 6 | Well described                                                                                      |
| Item 13 | 2 | Published in a peer reviewed journal.                                                                                  | 3 | Methods in the Appendix. External experts are involved the question choosing process, but it is not a review.                                                                                   | 1 | Not mentioned                                                                         | 1 | Not found                                                                                           |
| Item 14 | 1 | Not provided.                                                                                                          | 1 | '-6 : not mentioned.                                                                                                                                                                            | 1 | Not mentioned                                                                         | 1 | Not found                                                                                           |
| Item 15 | 5 | Uncertainty was not stated.                                                                                            | 6 | Some purposes of recommendations are not clearly stated.                                                                                                                                        | 5 | Subtract 1                                                                            | 5 | Well described                                                                                      |
| Item 16 | 7 | Recommendations.                                                                                                       | 7 | All points are included.                                                                                                                                                                        | 6 | Some options are provided with the most appropriate population or clinical situation. | 6 | Well described                                                                                      |

|                            |   |                                                                                                       |   |                                                                                                                                                                                                                                                                                                                                |   |                                                                                                           |   |                                                                                                                                                                                                          |
|----------------------------|---|-------------------------------------------------------------------------------------------------------|---|--------------------------------------------------------------------------------------------------------------------------------------------------------------------------------------------------------------------------------------------------------------------------------------------------------------------------------|---|-----------------------------------------------------------------------------------------------------------|---|----------------------------------------------------------------------------------------------------------------------------------------------------------------------------------------------------------|
| Item 17                    | 4 | Recommendations were presented in bold but were not grouped in a certain section.                     | 4 | Recommendations are typed in bold.<br>-3: recommendations are not grouped.                                                                                                                                                                                                                                                     | 4 | MISSED b                                                                                                  | 4 | Important advice has a key tag                                                                                                                                                                           |
| Item 18                    | 1 | Not provided.                                                                                         | 1 | -6: No relevant information.                                                                                                                                                                                                                                                                                                   | 1 | Not mentioned                                                                                             | 2 | In the recommendation 1, the barrier is described                                                                                                                                                        |
| Item 19                    | 1 | Not provided.                                                                                         | 1 | -6: No relevant information.                                                                                                                                                                                                                                                                                                   | 1 | Not mentioned                                                                                             | 1 | Not found                                                                                                                                                                                                |
| Item 20                    | 1 | Not provided.                                                                                         | 1 | -6: No relevant information.                                                                                                                                                                                                                                                                                                   | 2 | Mentioned in CT                                                                                           | 1 | Not found                                                                                                                                                                                                |
| Item 21                    | 1 | Not provided.                                                                                         | 1 | -6: No relevant information.                                                                                                                                                                                                                                                                                                   | 1 | Not mentioned                                                                                             | 1 | Not found                                                                                                                                                                                                |
| Item 22                    | 1 | Not provided.                                                                                         | 1 | -6: There's no such description about funding body.                                                                                                                                                                                                                                                                            | 1 | Not mentioned                                                                                             | 1 | Not found                                                                                                                                                                                                |
| Item 23                    | 4 | Appendix. A) and b) were not provided.                                                                | 4 | Appendix. I didn't find this information.                                                                                                                                                                                                                                                                                      | 6 | No potential competing interests                                                                          | 6 | Well described                                                                                                                                                                                           |
| <b>CRA_multi_2017 [22]</b> |   |                                                                                                       |   |                                                                                                                                                                                                                                                                                                                                |   |                                                                                                           |   |                                                                                                                                                                                                          |
| Item 1                     | 7 | Title and Paragraph 1.                                                                                | 7 | "promote multidiscipline cooperation, guide and regular the clinical practice of HUA related diseases" & "aims at promoting multi-disciplinary collaboration and providing guidelines in clinical practice for general practitioners, doctors from different disciplines at different levels."<br>Well written & easy to find. | 7 | All included                                                                                              | 7 | Can be found in the title and summary                                                                                                                                                                    |
| Item 2                     | 3 | Clinical questions considered could be indicated from the guideline but no clear statement was given. | 3 | -4: No specifically described question is provided in the guideline.                                                                                                                                                                                                                                                           | 3 | Contained "ab"                                                                                            | 5 | Analysed from the paragraph, but it not easy to find                                                                                                                                                     |
| Item 3                     | 7 | Paragraph 1.                                                                                          | 7 | Hua                                                                                                                                                                                                                                                                                                                            | 7 | No subtract                                                                                               | 6 | The population is not clearly described                                                                                                                                                                  |
| Item 4                     | 5 | Page 244. The role of each member was not provided and a methodologist was not involved.              | 5 | Easy to find.<br>-1: no description of member's role.<br>-1: No methodologist include.                                                                                                                                                                                                                                         | 4 | No discipline/content expertise and a description of the member's role in the guideline development group | 5 | The guideline development is stated in the last paragraph with their names, discipline/content expertise and institution, but doesn't describe the role of each member and no epidemiologist among them. |
| Item 5                     | 1 | Not sought.                                                                                           | 1 | -6: The views and preferences of the target population are not mentioned.                                                                                                                                                                                                                                                      | 2 | A has been mentioned                                                                                      | 1 | Not found                                                                                                                                                                                                |
| Item 6                     | 7 | Paragraph 1.                                                                                          | 7 | "Promoting multi-disciplinary collaboration and providing guidelines in clinical practice for general practitioners, doctors from different disciplines at different levels."                                                                                                                                                  | 6 | All included                                                                                              | 7 | Can be found in the title and summary                                                                                                                                                                    |
| Item 7                     | 1 | Not provided.                                                                                         | 1 | -6: Searching method is no provided.                                                                                                                                                                                                                                                                                           | 1 | Not mentioned                                                                                             | 1 | Not found                                                                                                                                                                                                |

|         |   |                                                                                                                                                                |   |                                                                                                                                                                                                                                                                                                                                                          |   |                                                                                                                                   |   |                                                                                         |
|---------|---|----------------------------------------------------------------------------------------------------------------------------------------------------------------|---|----------------------------------------------------------------------------------------------------------------------------------------------------------------------------------------------------------------------------------------------------------------------------------------------------------------------------------------------------------|---|-----------------------------------------------------------------------------------------------------------------------------------|---|-----------------------------------------------------------------------------------------|
| Item 8  | 1 | Not provided.                                                                                                                                                  | 1 | -6: Criteria are no provided.                                                                                                                                                                                                                                                                                                                            | 1 | Not mentioned                                                                                                                     | 1 | Not found                                                                               |
| Item 9  | 1 | Not provided.                                                                                                                                                  | 1 | -6: Strengths and Limitations of The Evidence are not described.                                                                                                                                                                                                                                                                                         | 1 | Not mentioned                                                                                                                     | 1 | Not found                                                                               |
| Item 10 | 1 | Not provided.                                                                                                                                                  | 2 | The guideline was developed though discussion of experts from multi-discipline.<br>-5: No any other details about the formulation (detailed process, outcomes or influence) is provided.                                                                                                                                                                 | 1 | Not mentioned                                                                                                                     | 1 | Not found                                                                               |
| Item 11 | 5 | Pages 237-242. For the most informative recommendation (the ULT recommendations), c) was not provided. A) was not provided for the allopurinol recommendation. | 5 | Most informative examples: Page 241 "HUA with cardiovascular diseases".<br>-1: No supporting data of harms.<br>-1: Not all recommendations reflect the consideration of benefits and harms.                                                                                                                                                              | 5 | Subtract 1                                                                                                                        | 5 | The benefits and side effects are considered in some tips, but the evidence are limited |
| Item 12 | 3 | Pages 237-242. A) and c) were not provided.                                                                                                                    | 2 | Some recommendations (e.g. Page 241 "HUA with metabolic syndrome") are linked to evidence description.<br>-2: How they linked and used the evidence to inform recommendations are not described.<br>-2: No link between recommendations and evidence summary.<br>-1: Not all recommendations include an evidence description (e.g. Page 237 "smoking" ). | 5 | Only some recommendations meet criteria, and no table                                                                             | 1 | Not found                                                                               |
| Item 13 | 2 | The guideline was published in a peer-reviewed journal, but no information on external review provided.                                                        | 1 | -6: No description about external review.                                                                                                                                                                                                                                                                                                                | 1 | Not mentioned                                                                                                                     | 1 | Not found                                                                               |
| Item 14 | 1 | Not provided.                                                                                                                                                  | 1 | -6: No statement about updating.                                                                                                                                                                                                                                                                                                                         | 1 | Not mentioned                                                                                                                     | 1 | Not found                                                                               |
| Item 15 | 5 | Pages 237-242. B) was not provided in the non-pharmacological treatment recommendation.                                                                        | 5 | Most informative example: Page 237 "management of patients with gout".<br>-1: Some recommendations are without an intent or purpose (e.g. Page 237 Non-drug therapy).<br>-1: Some uncertainty exists, but not reflected in recommendations, and is not explicitly stated.                                                                                | 5 | Subtract 1                                                                                                                        | 5 | Can be found in some recommendation but without purpose                                 |
| Item 16 | 7 | Pages 237-242.                                                                                                                                                 | 7 | The different options for management of the condition or health issue are clearly presented.                                                                                                                                                                                                                                                             | 5 | Subtract 1                                                                                                                        | 7 | Well described                                                                          |
| Item 17 | 2 | Pages 237-242. No summarized paragraph, table, or algorithm was provided.                                                                                      | 3 | -1: Table 1&2 are only summary of a very little part not the summary of the guideline.<br>-3: recommendations can not be easily distinguished form other content, and they are not grouped.                                                                                                                                                              | 3 | Description of recommendations were not in a summarized box, typed in bold, underlined, or presented as flow charts or algorithms | 4 | No summary                                                                              |

|                      |   |                                                                                                                                                          |   |                                                                                                                                                                                                                                                                           |   |                                                                                               |   |                                  |
|----------------------|---|----------------------------------------------------------------------------------------------------------------------------------------------------------|---|---------------------------------------------------------------------------------------------------------------------------------------------------------------------------------------------------------------------------------------------------------------------------|---|-----------------------------------------------------------------------------------------------|---|----------------------------------|
| Item 18              | 1 | Not provided.                                                                                                                                            | 1 | -6: No description of facilitators or barriers to application.                                                                                                                                                                                                            | 1 | Not mentioned                                                                                 | 1 | Not found                        |
| Item 19              | 1 | Not provided.                                                                                                                                            | 1 | -6: No information about implementation.                                                                                                                                                                                                                                  | 1 | Not mentioned                                                                                 | 2 | Gives some tools in the appendix |
| Item 20              | 1 | Not provided.                                                                                                                                            | 1 | -6: cost is not mentioned.                                                                                                                                                                                                                                                | 1 | Not mentioned                                                                                 | 1 | Not found                        |
| Item 21              | 1 | Not provided.                                                                                                                                            | 1 | -6: No description of monitoring or auditing.                                                                                                                                                                                                                             | 2 | Identification of criteria to assess guideline implementation or adherence to recommendations | 1 | Not found                        |
| Item 22              | 1 | Not provided.                                                                                                                                            | 1 | -6: There's no such description about funding body.                                                                                                                                                                                                                       | 1 | Not mentioned                                                                                 | 1 | Not found                        |
| Item 23              | 1 | Not provided.                                                                                                                                            | 1 | -6: There's no such description about competing interests.                                                                                                                                                                                                                | 1 | Not mentioned                                                                                 | 1 | Not found                        |
| <b>CSE_2013 [37]</b> |   |                                                                                                                                                          |   |                                                                                                                                                                                                                                                                           |   |                                                                                               |   |                                  |
| Item 1               | 7 | Title and Introduction.                                                                                                                                  | 7 | The Objectives is clearly stated as "to provide guidance for effectively controlling HUA clinically", and the epidemiology and harm are provided as background information.                                                                                               | 7 | All included                                                                                  | 7 | Well described                   |
| Item 2               | 1 | Not provided.                                                                                                                                            | 3 | -6: No specifically described question is provided in the guideline.                                                                                                                                                                                                      | 1 | Not mentioned                                                                                 | 2 | Analysed from the article        |
| Item 3               | 6 | The target population indicated from the title (patients with hyperuricemia or gout) and from the guideline (patient with hyperuricemia) was conflicted. | 6 | -1: From the title the target population should be patients with "HUA & gout", but from the objective it should be patients with "HUA" only. Besides, the detailed recommendations are mainly for HUA. So the target population is not clearly described.                 | 7 | All included                                                                                  | 6 | Analysed from the article        |
| Item 4               | 3 | Page 918. Only the names of the group member were provided.                                                                                              | 4 | The development group is clearly stated below the title, and all members' names are provided at the end.<br>-3: The discipline/content expertise, the institution and the role of each member are all missing, and there's no statement that a methodologist is included. | 2 | Mentioned "The guideline development group"                                                   | 3 | Only group and name              |
| Item 5               | 1 | Not sought.                                                                                                                                              | 1 | -6: The views and preferences of the target population are not mentioned.                                                                                                                                                                                                 | 1 | Not mentioned                                                                                 | 1 | Not found                        |
| Item 6               | 6 | The target user could be indicated from the guideline but was not clearly stated.                                                                        | 6 | The target audience can be inferred as clinical practitioners from the word "clinically", and the guideline may be used by "providing guidance".<br>-1: The target audience is not clearly described.                                                                     | 7 | All included                                                                                  | 5 | Analysed from the article        |
| Item 7               | 1 | Not provided.                                                                                                                                            | 1 | -6: Searching method is no provided.                                                                                                                                                                                                                                      | 1 | Not mentioned                                                                                 | 1 | Not found                        |
| Item 8               | 1 | Not provided.                                                                                                                                            | 1 | -6: Criteria are not provided.                                                                                                                                                                                                                                            | 1 | Not mentioned                                                                                 | 1 | Not found                        |
| Item 9               | 2 | Pages 915-918. Only a) and c) in some evidences were provided.                                                                                           | 3 | The most informative evidence: Table 1. The table and its explanation below provide study designs, relevance of outcomes                                                                                                                                                  | 2 | Mentioned "b123", subtract 1                                                                  | 1 | Not found                        |

|         |   |                                                                                                           |   |                                                                                                                                                                                                                                                                                                                                                                                                                                                                                                                                                           |   |                          |                                                                 |
|---------|---|-----------------------------------------------------------------------------------------------------------|---|-----------------------------------------------------------------------------------------------------------------------------------------------------------------------------------------------------------------------------------------------------------------------------------------------------------------------------------------------------------------------------------------------------------------------------------------------------------------------------------------------------------------------------------------------------------|---|--------------------------|-----------------------------------------------------------------|
|         |   |                                                                                                           |   | and consistency of results.<br>-3: The method to evaluate the strengths and limitations of evidence is not provided.<br>-1: The information is only reported for some of the evidences.                                                                                                                                                                                                                                                                                                                                                                   |   |                          |                                                                 |
| Item 10 | 1 | Not provided.                                                                                             | 1 | -6: The methods are not described.                                                                                                                                                                                                                                                                                                                                                                                                                                                                                                                        | 1 | Not mentioned            | 1 Not found                                                     |
| Item 11 | 5 | Pages 915-918. Some recommendations did not provide the harms.                                            | 5 | Most informative recommendation: Page 915, Five (One) 2. Alkalinization of Urine. Benefits & supporting data are reported; Risks are reported; the balance is reported; and the recommendation reflects the consideration of both.<br>-1: No supporting data for the risks.<br>-1: Only some of the recommendations report all the information.                                                                                                                                                                                                           | 5 | Subtract 1               | 5 Some recommendations give the harms                           |
| Item 12 | 5 | Page 915. An evidence summary table was provided. A) was not provided.                                    | 3 | Some recommendations are linked to a key evidence description, for example: Table 1, Page 915 Five (One) 1. General treatment.<br>-2 : how the guideline development group linked and used the evidence to inform recommendations is not reported.<br>-1: Not all recommendations are linked to a supporting evidence.<br>-1: There is an evidence table, but it's not a summary for all recommendations. It's only for one recommendation.                                                                                                               | 3 | Key evidence description | 3 Some recommendations are linked to a key evidence description |
| Item 13 | 1 | Not provided.                                                                                             | 1 | -6: No statement of external review is provided.                                                                                                                                                                                                                                                                                                                                                                                                                                                                                                          | 1 | Not mentioned            | 1 Not found                                                     |
| Item 14 | 1 | Not provided.                                                                                             | 1 | -6: Updating procedure is not provided.                                                                                                                                                                                                                                                                                                                                                                                                                                                                                                                   | 1 | Not mentioned            | 1 Not found                                                     |
| Item 15 | 5 | Pages 915-918.                                                                                            | 6 | Most recommendations are specific and unambiguous. The uncertainty is explicitly stated (Page 918 Five (Five) 5. Traditional Chinese medicine. Purposes of recommended actions are clear (Page 918 Five (Five) 2. (1) benzbromarone). The relevant population is clear (Page 918 Five (Five) 2. (1) benzbromarone: indication ). The qualifying statements are clear (Page 918 Five (Five) 2. (1) benzbromarone contraindication & caution).<br>-1: The relevant population is not clearly stated in some recommendations (Page 918 Five (Five) 2. (2) ). | 6 | Subtract 1               | 5 Most recommendations are well described                       |
| Item 16 | 6 | Pages 915-918. The appropriate population was not provided in some management options (e.g., probenecid). | 6 | Management options with appropriate populations are clearly described.<br>-1: Some options are without a description of appropriate                                                                                                                                                                                                                                                                                                                                                                                                                       | 6 | All included             | 4 No b)                                                         |

|                        |   |                                                                                                                                                                        |   |                                                                                                                                              |   |                                                                            |                                                                |
|------------------------|---|------------------------------------------------------------------------------------------------------------------------------------------------------------------------|---|----------------------------------------------------------------------------------------------------------------------------------------------|---|----------------------------------------------------------------------------|----------------------------------------------------------------|
|                        |   |                                                                                                                                                                        |   | population or situation (Page 918 Five (Five) 2. (2) no contraindication provided.                                                           |   |                                                                            |                                                                |
| Item 17                | 7 | The recommendations were summarized in the abstract and presented by two flow charts (page 916).                                                                       | 7 | The key points are at the beginning.<br>Two flow charts are provided.<br>Relevant recommendations are grouped together.                      | 6 | All included                                                               | 7 Well described                                               |
| Item 18                | 3 | The availability of uricase (page 918) was discussed but no detail was given.                                                                                          | 3 | A barrier was identified (Page 918 Five (Five) 2.(3) "not in the market in China").<br>-4: Other information about this barrier is provided. | 3 | Uricase availability                                                       | 3 The availability of uricase is given                         |
| Item 19                | 1 | Not provided.                                                                                                                                                          | 1 | -6: No such advice or tool is provided.                                                                                                      | 1 | Not mentioned                                                              | 1 Not found                                                    |
| Item 20                | 1 | Not provided.                                                                                                                                                          | 1 | -6: Resource implications are not considered.                                                                                                | 1 | Not mentioned                                                              | 1 Not found                                                    |
| Item 21                | 1 | Not provided.                                                                                                                                                          | 1 | -6: Such criteria are not provided.                                                                                                          | 2 | A was mentioned                                                            | 1 Not found                                                    |
| Item 22                | 1 | Not provided.                                                                                                                                                          | 1 | -6: There's no such description about funding body.                                                                                          | 1 | Not mentioned                                                              | 1 Not found                                                    |
| Item 23                | 1 | Not provided.                                                                                                                                                          | 1 | -6: There's no such description about competing interests.                                                                                   | 1 | Not mentioned                                                              | 1 Not found                                                    |
| <b>EULAR_2006 [18]</b> |   |                                                                                                                                                                        |   |                                                                                                                                              |   |                                                                            |                                                                |
| Item 1                 | 5 | Abstract and the first paragraph. B) was only provided as epidemiological information. This item was not easy to find.                                                 | 6 | Easy to find.<br>-1: expected benefit can be inferred, but is not clearly stated.                                                            | 7 | All included                                                               | 6 Can be found in the 1st paragraph,1' for the performance     |
| Item 2                 | 5 | Page 1301. 10 key propositions were collected, but no detail was given.                                                                                                | 5 | The 10 initial propositions<br>-2: they are not listed.                                                                                      | 7 | All included                                                               | 5 Analysed from the recommends                                 |
| Item 3                 | 7 | Abstract and the first paragraph.                                                                                                                                      | 7 | Gout                                                                                                                                         | 7 | All included                                                               | 7 Well described                                               |
| Item 4                 | 5 | Page 1310. The name of group and detailed information of the members were provided. But the role of each member was not provided and a methodologist was not involved. | 5 | Clear and easy to find.<br>-1: no methodologist involved.<br>-1: role of each member is not stated.                                          | 5 | Missed description of the member's role in the guideline development group | 5 Can be found in the methods and the appendix, but is unclear |
| Item 5                 | 1 | Not sought.                                                                                                                                                            | 1 | -6: "patient opinion was omitted".                                                                                                           | 1 | Not mentioned                                                              | 1 Not found                                                    |
| Item 6                 | 1 | Not provided.                                                                                                                                                          | 1 | This is not described.                                                                                                                       | 1 | Not mentioned                                                              | 2 The description is unclear                                   |
| Item 7                 | 7 | Page 1302 and Appendix.                                                                                                                                                | 7 | Appendix, but I can't find.                                                                                                                  | 7 | All included                                                               | 7 In the methods and appendix                                  |
| Item 8                 | 7 | Page 1302.                                                                                                                                                             | 7 | Page 1302 inclusion/exclusion criteria                                                                                                       | 7 | All included                                                               | 7 Can be found in the methods and the appendix                 |
| Item 9                 | 5 | Pages 1302-1303. Evidence levels were measured but only based on the design of study.                                                                                  | 6 | -1: only study design and methodology limitations are considered.                                                                            | 6 | Subtract 1                                                                 | 6 Grade of evidence                                            |
| Item 10                | 3 | Methods section. Although Delphi                                                                                                                                       | 5 | -2: some outcomes are not provided.                                                                                                          | 5 | C was not mentioned                                                        | 4 Is mentioned in the methods, but                             |



|         |   |                                                                                                                                            |   |                                                                                                                                                                                                                                                         |   |                                                |                           |                                                                                    |
|---------|---|--------------------------------------------------------------------------------------------------------------------------------------------|---|---------------------------------------------------------------------------------------------------------------------------------------------------------------------------------------------------------------------------------------------------------|---|------------------------------------------------|---------------------------|------------------------------------------------------------------------------------|
|         |   | technique was adopted for proposition synthesis, when coming to the formulation of recommendations, the process was not clearly described. |   |                                                                                                                                                                                                                                                         |   |                                                | without clear description |                                                                                    |
| Item 11 | 6 | Results section. Some of the recommendations did not consider the harms (e.g., Recommendation 4).                                          | 6 | Most informative: recommendation 1.<br>-1: not all recommendations reflect the consideration of benefits and harms. (e.g. Recommendation 4)                                                                                                             | 7 | All included                                   | 5                         | Some recommendations have all above                                                |
| Item 12 | 5 | Methods and Results section. C) was not provided.                                                                                          | 6 | Table 4 & 5.<br>-1: recommendation 4 is not linked to evidence.                                                                                                                                                                                         | 6 | Subtract 1                                     | 6                         | A figure                                                                           |
| Item 13 | 2 | Published in a peer reviewed journal.                                                                                                      | 1 | -6: not mentioned.                                                                                                                                                                                                                                      | 1 | Not mentioned                                  | 1                         | Not found                                                                          |
| Item 14 | 1 | Not provided.                                                                                                                              | 1 | -6: not mentioned.                                                                                                                                                                                                                                      | 1 | Not mentioned                                  | 6                         | Updated information and services can be found at a web                             |
| Item 15 | 5 | Results section. B) was not provided clearly.                                                                                              | 6 | -1: not all recommendations provide intent or purpose.                                                                                                                                                                                                  | 7 | All included                                   | 6                         | Well described                                                                     |
| Item 16 | 7 | Not applicable.                                                                                                                            | 7 | All points are included.                                                                                                                                                                                                                                | 7 | All included                                   | 6                         | Well described                                                                     |
| Item 17 | 7 | Results sec. Recommendations were grouped in Table 3.                                                                                      | 6 | Table 3.<br>Recommendations are in bold.<br>"propositions are grouped by topic (clinical, urate crystals, biochemical, radiographic, and risk factors/comorbidities) with no weighting according to order."<br>-1: the groups are not easy to identify. | 7 | All included                                   | 6                         | It has a figure                                                                    |
| Item 18 | 1 | Not provided.                                                                                                                              | 1 | -6: not mentioned.                                                                                                                                                                                                                                      | 1 | Not mentioned                                  | 1                         | Not found                                                                          |
| Item 19 | 2 | Page 1309. The specificity and sensitivity of the diagnostic methods were tested.                                                          | 4 | Figure 4. & the explanation below.<br>-2: no implementation section for the guideline.<br>-1: no other tools.                                                                                                                                           | 1 | All included                                   | 3                         | Some recommends                                                                    |
| Item 20 | 5 | Methods (page 1303) was given but the outcomes were not clearly provided.                                                                  | 6 | Recommendation 3 & 8.<br>Cost-effectiveness ratios are considered, but lack of sufficient evidence.<br>-1: no description of informing the development.                                                                                                 | 5 | Mentioned Incremental cost-effectiveness ratio | 5                         | Some recommends cover it                                                           |
| Item 21 | 1 | Not provided.                                                                                                                              | 1 | -6: not mentioned.                                                                                                                                                                                                                                      | 1 | Not mentioned                                  | 1                         | Not found                                                                          |
| Item 22 | 4 | Acknowledgement section.                                                                                                                   | 4 | "thank the European League Against Rheumatism for financial support"<br>-3: no statement of influence                                                                                                                                                   | 1 | Not mentioned                                  | 3                         | One sentence: "thank the European League Against Rheumatism for financial support" |
| Item 23 | 1 | Not provided.                                                                                                                              | 1 | -6: no information about competing interests.                                                                                                                                                                                                           | 1 | Not mentioned                                  | 1                         | Not found                                                                          |

| EULAR_2011 [17] |   |                                                                                                                                                             |   |                                                                                                                                                                                                                                                      |   |                                                                                          |   |                                                    |
|-----------------|---|-------------------------------------------------------------------------------------------------------------------------------------------------------------|---|------------------------------------------------------------------------------------------------------------------------------------------------------------------------------------------------------------------------------------------------------|---|------------------------------------------------------------------------------------------|---|----------------------------------------------------|
| Item 1          | 6 | Abstract. B) was provided as epidemiological information.                                                                                                   | 6 | Easy to find.<br>-1: expected benefit can be inferred, but is not clearly stated.                                                                                                                                                                    | 7 | All included                                                                             | 7 | Well described                                     |
| Item 2          | 5 | Page 4. Clinical topics were proposed, but no detail was provided.                                                                                          | 5 | "Important patient-centred diagnostic and management outcomes were created for each recommendation".<br>-2: these topics are not provided with details.                                                                                              | 5 | Included ab                                                                              | 5 | Analysed from the recommends                       |
| Item 3          | 7 | Abstract.                                                                                                                                                   | 7 | Gout                                                                                                                                                                                                                                                 | 7 | All included                                                                             | 7 | Well described                                     |
| Item 4          | 4 | Page 3-4. Only the names, disciplines, and institutes of authors were provided. No methodologist was involved.                                              | 5 | Easy to find.<br>A methodologist (bonny p. McClain) involved.<br>-1: role of each member is not provided.<br>-1: the development group is not stated.                                                                                                | 6 | No methodologist                                                                         | 5 | No epidemiologist                                  |
| Item 5          | 1 | Not sought.                                                                                                                                                 | 1 | -6: no information about patient views.                                                                                                                                                                                                              | 1 | Not mentioned                                                                            | 1 | Not found                                          |
| Item 6          | 7 | Abstract and the first paragraph.                                                                                                                           | 3 | "Paying special attention to the needs of primary care physicians".<br>-2: no clear statement of target users.<br>-2: no description of how to use, it can only be inferred.<br>Primary care physicians can be inferred as part of the target users. | 7 | All included                                                                             | 6 | Well described                                     |
| Item 7          | 4 | Page 5. The names of databases searched and the time period were provided.                                                                                  | 4 | "Literature Inclusion/Exclusion Criteria" part.<br>-1: search terms are not provided.<br>-2: full search strategy is not provided.                                                                                                                   | 4 | Missed cd, target research was conducted through Pubmed, from Feb 2005 through Feb. 2011 | 4 | C) and d) are not found                            |
| Item 8          | 1 | Not provided.                                                                                                                                               | 7 | "Literature Inclusion/Exclusion Criteria" part.                                                                                                                                                                                                      | 4 | Description of the inclusion criteria, study design                                      | 6 | Well described                                     |
| Item 9          | 7 | Page 4. GRADE approach.                                                                                                                                     | 7 | Grade                                                                                                                                                                                                                                                | 7 | All included                                                                             | 6 | Literature Inclusion/Exclusion Criteria is unclear |
| Item 10         | 7 | The process was provided both in description (page 5) and as a diagram (figure 1). The outcomes of strength of recommendations were provided in tables 1&2. | 4 | "Methods" part.<br>-1: the development process is described, but some of it is not provided with details. ( e.g. How they created the "important patient-centred diagnostic and management outcomes")<br>-2: outcomes are not provided.              | 7 | All included                                                                             | 6 | In figure 1                                        |
| Item 11         | 7 | Results section.                                                                                                                                            | 7 | The level of recommendation reflects the consideration of benefits and harms.( end of page 5).<br>Most informative: management recommendation 4.                                                                                                     | 7 | All included                                                                             | 7 | It mentions all of the aspects                     |
| Item 12         | 7 | Methods and Results section. Evidence was                                                                                                                   | 7 | How they linked is described.                                                                                                                                                                                                                        | 7 | All included                                                                             | 7 | Each recommendation has certain                    |

|                        |   |                                                                                           |   |                                                                                                                                                                                                                                                                   |   |                                                                                                                                     |      |                                                                                                            |
|------------------------|---|-------------------------------------------------------------------------------------------|---|-------------------------------------------------------------------------------------------------------------------------------------------------------------------------------------------------------------------------------------------------------------------|---|-------------------------------------------------------------------------------------------------------------------------------------|------|------------------------------------------------------------------------------------------------------------|
|                        |   | summarized into tables.                                                                   |   | Each recommendation is linked to a key evidence paragraph.<br>Evidence summaries: table 3&7.                                                                                                                                                                      |   |                                                                                                                                     | link |                                                                                                            |
| Item 13                | 2 | Published in a peer reviewed journal.                                                     | 1 | -6: not mentioned in the guideline.                                                                                                                                                                                                                               | 1 | Not mentioned                                                                                                                       | 1    | Not found                                                                                                  |
| Item 14                | 1 | Not provided.                                                                             | 1 | -6: not mentioned in the guideline.                                                                                                                                                                                                                               | 1 | Not mentioned                                                                                                                       | 1    | It's already updated from 2006                                                                             |
| Item 15                | 5 | Results section. B) was not provided.                                                     | 6 | -1: not all recommendations provide intent or purpose.                                                                                                                                                                                                            | 6 | Subtract 1                                                                                                                          | 6    | Well described                                                                                             |
| Item 16                | 7 | Results section.                                                                          | 7 | All points are included.                                                                                                                                                                                                                                          | 7 | All included                                                                                                                        | 6    | Well described                                                                                             |
| Item 17                | 7 | Recommendations were typed in bold (Results section) and summarized (Discussion section). | 7 | Recommendations are in bold.<br>Table 1&2.<br>Recommendations are grouped as "diagnosis" & "management".                                                                                                                                                          | 7 | All included                                                                                                                        | 6    | Can be found in table 2                                                                                    |
| Item 18                | 2 | Page 27. The limited FDA approval for NSAIDs was discussed.                               | 1 | -6: not mentioned in the guideline.                                                                                                                                                                                                                               | 1 | Not mentioned                                                                                                                       | 1    | Not found                                                                                                  |
| Item 19                | 1 | Not provided.                                                                             | 1 | -6: not mentioned in the guideline.                                                                                                                                                                                                                               | 1 | Not mentioned                                                                                                                       | 2    | Only table 6 mentions some                                                                                 |
| Item 20                | 2 | Pages 24&26. The cost-effectiveness of drugs were considered.                             | 5 | Recommendations 9 & 11.<br>-1: no description of the cost information that emerged.<br>-1: no description of how it was used to inform the development of guideline.                                                                                              | 4 | Mentioned drug acquisition costs                                                                                                    | 4    | In figure 1, the last step considers resource use, but not clearly                                         |
| Item 21                | 1 | Not provided.                                                                             | 1 | -6: not mentioned in the guideline.                                                                                                                                                                                                                               | 1 | Not mentioned                                                                                                                       | 1    | Not found                                                                                                  |
| Item 22                | 4 | Acknowledgement section. B) was not provided.                                             | 4 | Acknowledge part.<br>-3: no statement of influence.                                                                                                                                                                                                               | 4 | Funding for the preparation of the article was received from URL Pharma, and from the American Society of Clinical Rheumatologists. | 3    | Give the funding body but no statements                                                                    |
| Item 23                | 4 | Page 31. The conflict of interest statement was provided, but a) and d) were not given.   | 4 | Conflict of interest part.<br>-2: no statement of influence.<br>-1: no methods.                                                                                                                                                                                   | 6 | Page 31, missed b                                                                                                                   | 4    | The description of competing interests is not specific                                                     |
| <b>EULAR_2016 [16]</b> |   |                                                                                           |   |                                                                                                                                                                                                                                                                   |   |                                                                                                                                     |      |                                                                                                            |
| Item 1                 | 7 | Abstract                                                                                  | 7 | "These recommendations aim to inform physicians and patients about the non-pharmacological and pharmacological treatments for gout and to provide the best strategies to achieve the predefined urate target to cure the disease."<br>Well written, easy to find. | 5 | Not mentioned outcome                                                                                                               | 6    | The epidemiology is provided, and other information can be found in the last paragraph of the introduction |
| Item 2                 | 7 | Results section.                                                                          | 1 | -6: No specifically described question is provided in the guideline.                                                                                                                                                                                              | 5 | No questions                                                                                                                        | 6    | Analysed from the recommends                                                                               |
| Item 3                 | 7 | Abstract.                                                                                 | 7 | Gout                                                                                                                                                                                                                                                              | 7 | All included                                                                                                                        | 7    | Well described                                                                                             |

|         |   |                                                                                                                                                                                              |   |                                                                                                                                                                                                                                                                   |   |                                                                |   |                                                                                                                                                  |
|---------|---|----------------------------------------------------------------------------------------------------------------------------------------------------------------------------------------------|---|-------------------------------------------------------------------------------------------------------------------------------------------------------------------------------------------------------------------------------------------------------------------|---|----------------------------------------------------------------|---|--------------------------------------------------------------------------------------------------------------------------------------------------|
| Item 4  | 6 | Methods section and Author affiliations section. The role of each member was not provided.                                                                                                   | 6 | Clear & easy to find.<br>3 experts in epidemiology/methodology are included.<br>Role: Methods & Contributors.<br>-1: role of each member is not clearly stated.                                                                                                   | 5 | Subtract 2' for no role                                        | 6 | The methods and appendix provide the authors' information                                                                                        |
| Item 5  | 5 | Two patients were in the task force. C) was not provided.                                                                                                                                    | 5 | -2: the outcome is not provided.                                                                                                                                                                                                                                  | 5 | 2 patients                                                     | 5 | It has a) b) and d)                                                                                                                              |
| Item 6  | 7 | Abstract.                                                                                                                                                                                    | 7 | "These recommendations aim to inform physicians and patients about the non-pharmacological and pharmacological treatments for gout and to provide the best strategies to achieve the predefined urate target to cure the disease."<br>Well written, easy to find. | 5 | Mentioned ab                                                   | 7 | In the conclusion                                                                                                                                |
| Item 7  | 5 | Methods section. D) was not provided.                                                                                                                                                        | 5 | -2: The full search strategy is not provided.                                                                                                                                                                                                                     | 5 | No strategy                                                    | 5 | No full strategy                                                                                                                                 |
| Item 8  | 2 | Methods section. Only general criteria on study design was provided.                                                                                                                         | 2 | -5: the supplementary material mentioned the inclusion criteria, but the criteria are not specifically described.                                                                                                                                                 | 1 | Not mentioned                                                  | 3 | It is unclear                                                                                                                                    |
| Item 9  | 7 | Methods section. The Oxford Centre for Evidence Based Medicine standard and the GRADE method.                                                                                                | 7 | Oxford levels of evidence.<br>Details in supplementary material                                                                                                                                                                                                   | 6 | GRADE method                                                   | 5 | The quality of evidence and grades of recommendation were determined according to the standards of the Oxford Centre for Evidence-Based Medicine |
| Item 10 | 7 | Method section. Delphi approach was adopted.                                                                                                                                                 | 7 | Very clear in Methods.<br>Outcomes in supplementary material.                                                                                                                                                                                                     | 6 | All included                                                   | 7 | The description is clear                                                                                                                         |
| Item 11 | 7 | Results section.                                                                                                                                                                             | 6 | Most informative example: recommendation 3 & 8.<br>-1: Not all recommendations reflect the consideration of benefits and harms (e.g. Recommendation 5)                                                                                                            | 5 | Subtract 1                                                     | 6 | Well described                                                                                                                                   |
| Item 12 | 7 | Methods and Results section.                                                                                                                                                                 | 7 | Methods & Table 2.<br>Each recommendation has an evidence description.                                                                                                                                                                                            | 6 | All included                                                   | 6 | Well described                                                                                                                                   |
| Item 13 | 6 | Page 28, second paragraph to the right. The influence of external review on guideline development was not clearly stated. The outcome of external review was provided in supplementary data. | 6 | Methods & Acknowledgement.<br>Outcomes in supplementary material.<br>-1: the influence is not described.                                                                                                                                                          | 6 | The external evaluation is provided as                         | 6 | Well described                                                                                                                                   |
| Item 14 | 1 | Not provided.                                                                                                                                                                                | 3 | "These novel EULAR recommendations will undoubtedly require updating over the next few years".<br>-2: No specific time interval.<br>-2: No description of updating procedure.                                                                                     | 2 | Online supplementary material, and the research agenda appears | 2 | It is updated from the guideline of 2006                                                                                                         |
| Item 15 | 7 | Results section.                                                                                                                                                                             | 7 | All points are included.                                                                                                                                                                                                                                          | 5 | Subtract 1                                                     | 7 | Well described                                                                                                                                   |

|                       |   |                                                                                                                                                              |   |                                                                                                                                                                       |   |                                                               |   |                                                  |
|-----------------------|---|--------------------------------------------------------------------------------------------------------------------------------------------------------------|---|-----------------------------------------------------------------------------------------------------------------------------------------------------------------------|---|---------------------------------------------------------------|---|--------------------------------------------------|
| Item 16               | 7 | Results section.                                                                                                                                             | 7 | All points are included.                                                                                                                                              | 6 | All included                                                  | 7 | Well described                                   |
| Item 17               | 7 | Recommendations were summarized in table 1 and were grouped in the abstract.                                                                                 | 7 | Figure 1&2.<br>Recommendation are grouped ( overarching & others)                                                                                                     | 6 | All included                                                  | 7 | Well described                                   |
| Item 18               | 2 | Page 36 - "The task force was aware that not all ULTs mentioned in this paper, especially the uricosurics, are readily available in all European countries". | 4 | Barrier: "not all ULTs mentioned in this paper, especially the uricosurics, are readily available in all European countries".<br>-2: No methods.<br>-1: No influence. | 4 | Mentioned in Overarching principles                           | 2 | Only a little                                    |
| Item 19               | 2 | Algorithm as figure 1.                                                                                                                                       | 1 | -6: No such information.                                                                                                                                              | 1 | Not mentioned                                                 | 1 | Not found                                        |
| Item 20               | 5 | Page 35, 37, 38. b) not provided.                                                                                                                            | 6 | Recommendation 8.<br>-1: no description of the cost information.                                                                                                      | 4 | Mentioned ad                                                  | 5 | In the discussion part, the cost is discussed    |
| Item 21               | 1 | Not provided.                                                                                                                                                | 1 | -6: No such information.                                                                                                                                              | 1 | Not mentioned                                                 | 1 | Not found                                        |
| Item 22               | 1 | Not provided.                                                                                                                                                | 1 | -6: There's no such description about funding body.                                                                                                                   | 1 | Not mentioned                                                 | 3 | The statement doesn't be found                   |
| Item 23               | 4 | Page 38. b) and d) not provided.                                                                                                                             | 4 | -1: the methods are not described.<br>-2: no description of influence.                                                                                                | 4 | Mentioned abc                                                 | 4 | No b) or d)                                      |
| <b>FMOH_2014 [44]</b> |   |                                                                                                                                                              |   |                                                                                                                                                                       |   |                                                               |   |                                                  |
| Item 1                | 7 | Title and Foreword.                                                                                                                                          | 7 | "Foreword" & "1.6 purpose of the guideline"                                                                                                                           | 6 | Contained ab and performance                                  | 6 | In the foreword and the purpose of the guideline |
| Item 2                | 3 | The clinical topic could be inferred from throughout the guideline, but was not clearly stated.                                                              | 3 | The core topic can be inferred.<br>-4: no statement that certain health questions or topics are covered.                                                              | 2 | Contained "bd"                                                | 3 | No questions but analysed from the text          |
| Item 3                | 7 | Foreword.                                                                                                                                                    | 7 | NCD                                                                                                                                                                   | 5 | Subtract 2 points for the population is not clearly described | 7 | Analysed from the text                           |
| Item 4                | 6 | Acknowledgement section. No methodologist.                                                                                                                   | 5 | "Acknowledgement"<br>-1: role of each member is not provided.<br>-1 : no methodologist involved in the development group.                                             | 5 | Mentioned a, name ,expertise, institution and performance     | 5 | Group, name ,institution and role are provided   |
| Item 5                | 1 | Not provided.                                                                                                                                                | 1 | -6: no information about target population preferences.                                                                                                               | 1 | Not mentioned                                                 | 1 | Not found                                        |
| Item 6                | 4 | Foreword. B) was not provided.                                                                                                                               | 7 | "Foreword" & "1.5 purpose of the guideline"                                                                                                                           | 6 | No Clear description of intended guideline audience           | 6 | The purpose of the guideline                     |
| Item 7                | 1 | Not provided.                                                                                                                                                | 1 | -6: not mentioned in the guideline.                                                                                                                                   | 1 | Not mentioned                                                 | 1 | Not found                                        |
| Item 8                | 1 | Not provided.                                                                                                                                                | 1 | -6: not mentioned in the guideline.                                                                                                                                   | 1 | Not mentioned                                                 | 1 | Not found                                        |
| Item 9                | 1 | Not provided.                                                                                                                                                | 1 | -6: not mentioned in the guideline.                                                                                                                                   | 1 | Not mentioned                                                 | 1 | Not found                                        |
| Item 10               | 1 | Not provided.                                                                                                                                                | 1 | -6: not mentioned in the guideline.                                                                                                                                   | 1 | Not mentioned                                                 | 1 | Not found                                        |

|                         |   |                                                                                                                                                        |   |                                                                                                                                                                                                                          |   |                                                                   |   |                                                 |
|-------------------------|---|--------------------------------------------------------------------------------------------------------------------------------------------------------|---|--------------------------------------------------------------------------------------------------------------------------------------------------------------------------------------------------------------------------|---|-------------------------------------------------------------------|---|-------------------------------------------------|
| Item 11                 | 2 | Pages 54-55. Harms were not discussed and no reference was provided.                                                                                   | 2 | -5: only benefits are considered, but without evidence.                                                                                                                                                                  | 1 | Not mentioned                                                     | 3 | Some recommends consider the harm               |
| Item 12                 | 1 | Not provided.                                                                                                                                          | 1 | -6: not mentioned in the guideline.                                                                                                                                                                                      | 2 | Clear description of intended guideline audience                  | 2 | Each recommendation is linked to a key evidence |
| Item 13                 | 1 | Not provided.                                                                                                                                          | 1 | -6: not mentioned in the guideline.                                                                                                                                                                                      | 1 | Not mentioned                                                     | 1 | Not found                                       |
| Item 14                 | 1 | Not provided.                                                                                                                                          | 1 | -6: not mentioned in the guideline.                                                                                                                                                                                      | 1 | Not mentioned                                                     | 1 | Not found                                       |
| Item 15                 | 3 | Section 5.6.1. A) and b) were not provided.                                                                                                            | 4 | -2: uncertainty is not stated.<br>-1: the relevant population is not clearly stated. (e.g. The recommendation is for prevention and management of gout, all? For patient with gout? For those who want to prevent gout?) | 2 | Identification of the intent or purpose of the recommended action | 3 | The uncertain is not described                  |
| Item 16                 | 1 | Not provided                                                                                                                                           | 4 | -1: not all options are described.<br>-2: not all recommendations provide the most appropriate population or situation. (e.g. 5.6.1 recommendation f)                                                                    | 7 | All included                                                      | 6 | Well described                                  |
| Item 17                 | 4 | Section 5.6.1. Table 16. A) was not provided.                                                                                                          | 4 | E.g. Table 6.<br>-3: recommendations are not well grouped.                                                                                                                                                               | 6 | All included                                                      | 3 | Table, but it is not clear enough               |
| Item 18                 | 1 | Not provided.                                                                                                                                          | 1 | -6: no information about facilitators or barriers to application in the "gout" part.                                                                                                                                     | 1 | Not mentioned                                                     | 1 | Not found                                       |
| Item 19                 | 1 | Not provided.                                                                                                                                          | 2 | Table 16.<br>-5: no other information about implementation in the "gout" part.                                                                                                                                           | 1 | Not mentioned                                                     | 1 | Not found                                       |
| Item 20                 | 2 | Section 1.1. Background. Cost information was discussed.                                                                                               | 3 | Price is considered in policy part.                                                                                                                                                                                      | 1 | Not mentioned                                                     | 3 | Some consider the price                         |
| Item 21                 | 1 | Not provided.                                                                                                                                          | 1 | -6: no mentioned in the guideline.                                                                                                                                                                                       | 1 | Not mentioned                                                     | 1 | Not found                                       |
| Item 22                 | 1 | Not provided.                                                                                                                                          | 1 | -6: not mentioned.                                                                                                                                                                                                       | 1 | Not mentioned                                                     | 1 | Not found                                       |
| Item 23                 | 1 | Not provided.                                                                                                                                          | 1 | -6: not mentioned.                                                                                                                                                                                                       | 1 | Not mentioned                                                     | 1 | Not found                                       |
| <b>JSGNAM_2011 [48]</b> |   |                                                                                                                                                        |   |                                                                                                                                                                                                                          |   |                                                                   |   |                                                 |
| Item 1                  | 5 | Page 1018. B) was only provided as epidemiological information. This item was not easy to find.                                                        | 6 | Easy to find.<br>-1 : the expected benefit can be understand but not clearly stated.                                                                                                                                     | 5 | Statements were not clear                                         | 5 | Not easy to be found                            |
| Item 2                  | 5 | Page 1019. It was stated that 41 clinical questions were collected for the development of the guideline, but the detailed questions were not provided. | 5 | There were 41 clinical questions.<br>-2: the questions are not provided with details.                                                                                                                                    | 7 | All included                                                      | 5 | Not easy to be found                            |

1  
2  
3  
4  
5  
6  
7  
8  
9  
10  
11  
12  
13  
14  
15  
16  
17  
18  
19  
20  
21  
22  
23  
24  
25  
26  
27  
28  
29  
30  
31  
32  
33  
34  
35  
36  
37  
38  
39  
40  
41  
42  
43  
44  
45  
46  
47

|         |   |                                                                                                                                                                       |   |                                                                                                                                                           |   |                                                                                                                                                                                                                                                                                                                                                                                                                |   |                                                                                                         |
|---------|---|-----------------------------------------------------------------------------------------------------------------------------------------------------------------------|---|-----------------------------------------------------------------------------------------------------------------------------------------------------------|---|----------------------------------------------------------------------------------------------------------------------------------------------------------------------------------------------------------------------------------------------------------------------------------------------------------------------------------------------------------------------------------------------------------------|---|---------------------------------------------------------------------------------------------------------|
| Item 3  | 7 | Abstract.                                                                                                                                                             | 7 | Gout and HUA                                                                                                                                              | 7 | All included                                                                                                                                                                                                                                                                                                                                                                                                   | 7 | Well described                                                                                          |
| Item 4  | 2 | Only the name of group (the Japanese Society of Gout and Nucleic Acid Metabolism) was provided.                                                                       | 2 | The name of development group is stated.<br>-5: no other information.                                                                                     | 1 | Not mentioned                                                                                                                                                                                                                                                                                                                                                                                                  | 2 | Only the development group                                                                              |
| Item 5  | 4 | Page 1020, Methods section. A patient participated in reviewing the guideline. C) and d) were not provided.                                                           | 4 | The draft was reviewed by a patient.<br>-2: no outcomes.<br>-1: no description of the information was used to inform the recommendations.                 | 4 | The guideline revising committee collected clinical questions for the management of gout and hyperuricemia, and based on 41 clinical questions, a systematic literature search was conducted. From the results of this search, 492 articles were selected and reviewed by committee members, and recommendations for the management of gout and hyperuricemia were proposed as statements with evidence levels | 5 | A draft version of this guideline was reviewed by internal and external reviewers as well as a patient. |
| Item 6  | 4 | Abstract. A) was not clearly stated.                                                                                                                                  | 4 | How to use is involved. "guideline is appropriately used for the standard management and care of patients with hyperuricemia and gout in daily practice". | 4 | Used for the standard management and care of patients with hyperuricemia and gout in daily practice.                                                                                                                                                                                                                                                                                                           | 4 | Analysis from the paragraph 1                                                                           |
| Item 7  | 1 | Not provided.                                                                                                                                                         | 1 | -6: all the required information is not provided.                                                                                                         | 1 | Not mentioned                                                                                                                                                                                                                                                                                                                                                                                                  | 2 | Unclear                                                                                                 |
| Item 8  | 1 | Not provided.                                                                                                                                                         | 1 | -6: not mentioned in the guideline.                                                                                                                       | 1 | Not mentioned                                                                                                                                                                                                                                                                                                                                                                                                  | 1 | Not found                                                                                               |
| Item 9  | 6 | Page 1020, Methods section. Evidence levels were measured but only based on the design of study and on the consistency of original studies included in meta analysis. | 7 | Methods - evidence level part.                                                                                                                            | 7 | Not mentioned                                                                                                                                                                                                                                                                                                                                                                                                  | 7 | It has level of evidence                                                                                |
| Item 10 | 3 | Page 1019. A Delphi exercise was conducted to determine the consensus level, but b) and c) were not provided.                                                         | 4 | Methods part.<br>-1: lack of some details of the development process (e.g. How the questions were collected.)                                             | 1 | Not mentioned                                                                                                                                                                                                                                                                                                                                                                                                  | 5 | Delphi                                                                                                  |

|                              |   |                                                                                                                                                |   |                                                                                                                                                                                                                                                                                                      |   |                                                                                                         |                                                |
|------------------------------|---|------------------------------------------------------------------------------------------------------------------------------------------------|---|------------------------------------------------------------------------------------------------------------------------------------------------------------------------------------------------------------------------------------------------------------------------------------------------------|---|---------------------------------------------------------------------------------------------------------|------------------------------------------------|
|                              |   |                                                                                                                                                |   | -2: no outcomes.                                                                                                                                                                                                                                                                                     |   |                                                                                                         |                                                |
| Item 11                      | 6 | As for the Therapy of Hyperuricemia, all four aspects were provided. But the harms of treatment were not stated in some other recommendations. | 6 | Most informative: "Therapy of Hyperuricemia - Therapeutic Goal".<br>Not all recommendations showed the supporting data and report of harms and benefits.( e.g. Therapy of Gouty Arthritis/Gouty Tophus)                                                                                              | 7 | All included                                                                                            | 6 Well described                               |
| Item 12                      | 3 | B) was provided for all recommendations, but a) and c) were not.                                                                               | 4 | Methods.<br>-1: each recommendation has a level of evidence, but is not linked to a key evidence paragraph.<br>-2: no evidence summary.                                                                                                                                                              | 4 | Missed a                                                                                                | 4 Some recommends are linked with the evidence |
| Item 13                      | 2 | Page 1020. External review was conducted, but no detail was given.                                                                             | 3 | "A draft version of this guideline was reviewed by trustee members of the Japanese Society of Gout and Nucleic Acid Metabolism, and subsequently, public comments were requested by external reviewers"<br>-1: no purpose.<br>-1: no outcomes.<br>-2: no description of how the information is used. | 2 | A draft version of this guideline was reviewed by internal and external reviewers as well as a patient. | 3 The description is unclear                   |
| Item 14                      | 1 | Not provided.                                                                                                                                  | 1 | -6: not mentioned in the guideline.                                                                                                                                                                                                                                                                  | 1 | Not mentioned                                                                                           | 1 Not found                                    |
| Item 15                      | 7 | Results section.                                                                                                                               | 7 | All points are included.                                                                                                                                                                                                                                                                             | 7 | All included                                                                                            | 6 Well described                               |
| Item 16                      | 7 | Results section.                                                                                                                               | 6 | -1: only some options are provided with the most appropriate population or clinical situation (e.g. Lifestyle intervention is not).                                                                                                                                                                  | 6 | Subtract 1                                                                                              | 6 Well described                               |
| Item 17                      | 4 | Recommendations were provided in a box but not grouped together.                                                                               | 7 | Figure 2.<br>Recommendations are in boxes.<br>Recommendations are grouped.                                                                                                                                                                                                                           | 7 | All included                                                                                            | 5 B) is not mentioned                          |
| Item 18                      | 1 | Not provided.                                                                                                                                  | 1 | -6: not mentioned in the guideline.                                                                                                                                                                                                                                                                  | 1 | Not mentioned                                                                                           | 1 Not found                                    |
| Item 19                      | 1 | Not provided.                                                                                                                                  | 1 | -6: not mentioned in the guideline.                                                                                                                                                                                                                                                                  | 1 | Not mentioned                                                                                           | 1 Not found                                    |
| Item 20                      | 1 | Not provided.                                                                                                                                  | 1 | -6: not mentioned in the guideline.                                                                                                                                                                                                                                                                  | 1 | Not mentioned                                                                                           | 1 Not found                                    |
| Item 21                      | 1 | Not provided.                                                                                                                                  | 1 | -6: not mentioned in the guideline.                                                                                                                                                                                                                                                                  | 1 | Not mentioned                                                                                           | 1 Not found                                    |
| Item 22                      | 1 | Not provided.                                                                                                                                  | 1 | -6: not mentioned in the guideline.                                                                                                                                                                                                                                                                  | 1 | Not mentioned                                                                                           | 1 Not found                                    |
| Item 23                      | 1 | Not provided.                                                                                                                                  | 1 | -6: not mentioned in the guideline.                                                                                                                                                                                                                                                                  | 1 | Not mentioned                                                                                           | 1 Not found                                    |
| <b>MOH_MSR_AMM_2008 [49]</b> |   |                                                                                                                                                |   |                                                                                                                                                                                                                                                                                                      |   |                                                                                                         |                                                |
| Item 1                       | 6 | Page IV. A) and c) were provided. B) was only provided as epidemiological                                                                      | 7 | Page 3, rational 1st paragraph.<br>Page 4, objectives.                                                                                                                                                                                                                                               | 7 | All included                                                                                            | 7 Can be found in the page 4,objective         |



|         |   |                                                                                                                                                                                    |   |                                                                                                                                                                                               |   |                                                                                                          |   |                                                             |
|---------|---|------------------------------------------------------------------------------------------------------------------------------------------------------------------------------------|---|-----------------------------------------------------------------------------------------------------------------------------------------------------------------------------------------------|---|----------------------------------------------------------------------------------------------------------|---|-------------------------------------------------------------|
|         |   | information (page 1).                                                                                                                                                              |   |                                                                                                                                                                                               |   |                                                                                                          |   |                                                             |
| Item 2  | 7 | Page IV.                                                                                                                                                                           | 7 | Page 4, clinical questions.                                                                                                                                                                   | 7 | All included                                                                                             | 7 | In the clinical questions part                              |
| Item 3  | 7 | Page IV.                                                                                                                                                                           | 7 | Page 4, target population                                                                                                                                                                     | 7 | All included                                                                                             | 7 | In the target population part                               |
| Item 4  | 5 | The name of the group (page III) and detailed information of members (page V-VI) were provided. But the role of each member was not provided and a methodologist was not involved. | 5 | Clear and easy to find.<br>-1: no methodologist involved.<br>-1: role of each member is not provided.                                                                                         | 7 | All included                                                                                             | 5 | No role                                                     |
| Item 5  | 1 | Not sought.                                                                                                                                                                        | 3 | The draft was on the website for comments and feedbacks from the public. -1: this is not a clear statement that the target population is exactly involved. -2: no outcomes. -1: no influence. | 1 | Not mentioned                                                                                            | 1 | Not found                                                   |
| Item 6  | 7 | Page II.                                                                                                                                                                           | 7 | All information is described.                                                                                                                                                                 | 7 | All included                                                                                             | 7 | Target group is well described                              |
| Item 7  | 4 | Page III. Only the names of databases searched and the search terms were provided.                                                                                                 | 4 | Databases and search terms are provided.<br>-1: no time periods.<br>-2: no full search strategy.                                                                                              | 4 | Named electronic database and search terms                                                               | 5 | 3rd paragraph of the rationale, but without the time period |
| Item 8  | 1 | Not provided.                                                                                                                                                                      | 1 | -6: not mentioned.                                                                                                                                                                            | 1 | Not mentioned                                                                                            | 1 | Not found                                                   |
| Item 9  | 5 | Page 25. Evidence levels were measured only basing on the design of study.                                                                                                         | 6 | Page 25 level of evidence scale.<br>-1: only study design and methodology limitations are considered.                                                                                         | 6 | Subtract 1                                                                                               | 6 | The level of evidence only be graded by the type of article |
| Item 10 | 1 | Not provided.                                                                                                                                                                      | 2 | -5: the description of the process is not very detailed. The outcomes are not provided. The influence is not detailed.                                                                        | 1 | Not mentioned                                                                                            | 2 | In the rationale part                                       |
| Item 11 | 6 | Pages 9-17. Side effects of some treatments (e.g., NSAIDS, COX-2 inhibitors) were not provided.                                                                                    | 6 | Most informative: page 14 allopurinol.<br>-1: not all recommendations reflect the consideration of benefits and harms.                                                                        | 6 | Subtract 1                                                                                               | 5 | Found in the recommends                                     |
| Item 12 | 5 | A) was presented as the grades of recommendations. C) was not provided.                                                                                                            | 4 | Rationale.<br>-1: not every recommendation is linked to a key evidence description/paragraph and/or reference list.<br>-2: no evidence summary.                                               | 5 | Not described how the guideline development group linked and used the evidence to inform recommendations | 5 | A) was presented as the grades of recommendations           |
| Item 13 | 2 | External reviewers were provided (page VI) but no other detail was given.                                                                                                          | 3 | Methods and description of reviewers are provided.<br>-4: no other information.                                                                                                               | 2 | Mentioned the name of external review                                                                    | 3 | No details                                                  |
| Item 14 | 4 | The guideline was expected to be reviewed in 2012 (page II) but no methodology was provided. And at the time of scoring, no statement confirming the review/update                 | 5 | "This guideline will be reviewed in 2012 or sooner if new evidence becomes available"<br>-2: no methodology                                                                                   | 5 | Mentioned in statement of intent                                                                         | 5 | In the 3rd paragraph                                        |

|                      |   |                                                                                                                                                                                                 |   |                                                                                                                                                                   |   |                                                                                                         |                                                             |
|----------------------|---|-------------------------------------------------------------------------------------------------------------------------------------------------------------------------------------------------|---|-------------------------------------------------------------------------------------------------------------------------------------------------------------------|---|---------------------------------------------------------------------------------------------------------|-------------------------------------------------------------|
|                      |   | was found online.                                                                                                                                                                               |   |                                                                                                                                                                   |   |                                                                                                         |                                                             |
| Item 15              | 7 | Page 9-17                                                                                                                                                                                       | 6 | -1: not all recommendations provide intent or purpose.( e.g. 5.3)                                                                                                 | 7 | All included                                                                                            | 6 Well described                                            |
| Item 16              | 7 | Page 9-17                                                                                                                                                                                       | 7 | All points are included.                                                                                                                                          | 7 | All included                                                                                            | 6 Well described                                            |
| Item 17              | 7 | An algorithm (page IX) was provided and recommendations were summarized in a group (page VII-VIII).                                                                                             | 7 | Page 9 algorithms.<br>Recommendations are summarized and grouped in the summary (page 7-8).                                                                       | 7 | All included                                                                                            | 6 Well described                                            |
| Item 18              | 2 | Page 7, section 4.2. The availability of diagnostic service was discussed.                                                                                                                      | 3 | Barrier: page 7, 4.2. But it is only a simple description, no any other information is provided.                                                                  | 1 | Not mentioned                                                                                           | 1 Not found                                                 |
| Item 19              | 3 | Pages VIII - XI. A summary and algorithm were provided.                                                                                                                                         | 5 | The summary, algorithm.<br>-2: no implementation section                                                                                                          | 1 | Not mentioned                                                                                           | 3 Appendix 1                                                |
| Item 20              | 1 | Not provided.                                                                                                                                                                                   | 1 | -6: not mentioned.                                                                                                                                                | 1 | Not mentioned                                                                                           | 1 Not found                                                 |
| Item 21              | 1 | Not provided.                                                                                                                                                                                   | 1 | -6: not mentioned.                                                                                                                                                | 1 | Not mentioned                                                                                           | 1 Not found                                                 |
| Item 22              | 4 | Page 22. The name of the funding body was provided but b) was not given.                                                                                                                        | 4 | Source of funding part at the end.<br>-3: no statement of influence.                                                                                              | 4 | The name of the funding body or source of funding                                                       | 4 Unrestricted educational grant                            |
| Item 23              | 1 | Not provided.                                                                                                                                                                                   | 2 | Only the method is provided.<br>-5: no other information.                                                                                                         | 2 | Members have completed disclosure statement                                                             | 2 Disclosure statement                                      |
| <b>PRA_2008 [50]</b> |   |                                                                                                                                                                                                 |   |                                                                                                                                                                   |   |                                                                                                         |                                                             |
| Item 1               | 5 | Introduction section. B) was only provided as epidemiological information. This item was not easy to find.                                                                                      | 7 | Abstract, objective.<br>Well written, easy to find.                                                                                                               | 7 | All included                                                                                            | 7 In the abstract                                           |
| Item 2               | 3 | This item can be inferred from the last paragraph of the Introduction section but was not clearly given.                                                                                        | 7 | The issues are detailed.                                                                                                                                          | 7 | All included                                                                                            | 5 Analysed from the recommends                              |
| Item 3               | 5 | Inconsistent expressions. The Title and Recommendations were targeting patients with gout, while the Objectives in Abstract narrowed to patients with gouty arthritis.                          | 4 | Patients with gouty arthritis.<br>Or with gout?<br>Phase 1 is not about gout.<br>-3: not consistent through the whole guideline.                                  | 7 | All included                                                                                            | 5 Title and recommendations have conflicting descriptions   |
| Item 4               | 4 | Page 1. The name of group and detailed information of the technical review committee were provided. But the role of each member was not provided and a methodologist was not clearly indicated. | 3 | Easy to find.<br>-2: discipline and institution of panel members are not provided.<br>-1: role of each member is not described.<br>-1: no methodologist involved. | 4 | No discipline/content expertise, no description of the member's role in the guideline development group | 4 No the description of the member's role or epidemiologist |
| Item 5               | 5 | Page 1. A patient was included in the panel.                                                                                                                                                    | 5 | A patient was in the panel.<br>-2: outcomes are not provided.                                                                                                     | 5 | Mentioned in method                                                                                     | 5 Well described                                            |
| Item 6               | 7 | Introduction section.                                                                                                                                                                           | 7 | Introduction                                                                                                                                                      | 7 | All included                                                                                            | 7 Well described                                            |

|         |   |                                                                                                                                                                                                                                                                                                               |   |                                                                                                                                                     |   |                                                                                                  |   |                                                                                                 |
|---------|---|---------------------------------------------------------------------------------------------------------------------------------------------------------------------------------------------------------------------------------------------------------------------------------------------------------------|---|-----------------------------------------------------------------------------------------------------------------------------------------------------|---|--------------------------------------------------------------------------------------------------|---|-------------------------------------------------------------------------------------------------|
| Item 7  | 5 | Methodology section. The time periods, names of databases, and the search terms were provided.                                                                                                                                                                                                                | 5 | Methodology<br>-2: no full search strategy.                                                                                                         | 5 | Full search strategy was not clear                                                               | 5 | In the method part                                                                              |
| Item 8  | 1 | Not provided.                                                                                                                                                                                                                                                                                                 | 6 | Methodology<br>-1: outcomes are not included in the criteria.                                                                                       | 5 | No outcomes                                                                                      | 5 | It mentions but unclear                                                                         |
| Item 9  | 7 | Methodology section. GRADE system.                                                                                                                                                                                                                                                                            | 7 | Grade                                                                                                                                               | 7 | All included                                                                                     | 7 | Well described                                                                                  |
| Item 10 | 4 | Methodology section. A voting procedure was conducted and the GRADE system was used to evaluate the strength of recommendations. But the details of the voting was not provided (subtract 1') and how the voting and evaluation process influenced the guideline development were not provided (subtract 2'). | 4 | Methods part.<br>-1: lack of some details of the development process (e.g. How the issues were created.)<br>-2: no outcomes.                        | 6 | Panel members cast their votes to finalize the recommendations.                                  | 5 | In the method part                                                                              |
| Item 11 | 7 | Results section.                                                                                                                                                                                                                                                                                              | 6 | Most informative: phase 2 & recommendation 8.<br>-1: not all recommendations reflect the consideration of benefits and harms.                       | 7 | All included                                                                                     | 6 | Phase 3 and 4                                                                                   |
| Item 12 | 5 | Methodology section. C) was not provided.                                                                                                                                                                                                                                                                     | 4 | Methodology.<br>-1: evidence descriptions are linked to phases but not to each recommendation.<br>-2: no evidence summary.                          | 5 | Each recommendation was not linked to a key evidence description/paragraph and/or reference list | 5 | No summary                                                                                      |
| Item 13 | 1 | Not provided.                                                                                                                                                                                                                                                                                                 | 2 | "The Steering Committee would like to thank Dr. H Ralph Schumacher Jr for providing helpful comments on the contents".<br>-5: no other information. | 1 | Not mentioned                                                                                    | 1 | Not found                                                                                       |
| Item 14 | 5 | The last sentence of the guideline.                                                                                                                                                                                                                                                                           | 5 | "Updates in management issues will be integrated as deemed necessary in the next 3 or more years"<br>-2: no methodology                             | 5 | Updates in management issues will be integrated as deemed necessary in the next 3 or more years. | 5 | Updates in management issues will be integrated as deemed necessary in the next 3 or more years |
| Item 15 | 5 | Results section. B) was not provided.                                                                                                                                                                                                                                                                         | 5 | -2: some uncertainty is not stated.                                                                                                                 | 6 | Subtract 1                                                                                       | 5 | No purpose                                                                                      |
| Item 16 | 7 | Results section.                                                                                                                                                                                                                                                                                              | 6 | -1: some options are not provided with the most appropriate population or clinical situation.                                                       | 7 | All included                                                                                     | 6 | Well described                                                                                  |
| Item 17 | 4 | Recommendations were summarised as Table 1. A) was not provided.                                                                                                                                                                                                                                              | 7 | Recommendations are summarized and grouped in table 1.                                                                                              | 5 | A was not concluded                                                                              | 4 | In table 1                                                                                      |
| Item 18 | 2 | Page 9, the first sentence. The availability of allopurinol was discussed.                                                                                                                                                                                                                                    | 3 | "Allopurinol is the only drug available in this class in the Philippines."                                                                          | 1 | Not mentioned                                                                                    | 1 | Not found                                                                                       |

|                       |   |                                                                                                             |   |                                                                                                                                                                                                                                                    |   |                                |                                                                                                                                                                                                  |
|-----------------------|---|-------------------------------------------------------------------------------------------------------------|---|----------------------------------------------------------------------------------------------------------------------------------------------------------------------------------------------------------------------------------------------------|---|--------------------------------|--------------------------------------------------------------------------------------------------------------------------------------------------------------------------------------------------|
|                       |   |                                                                                                             |   | -4: no other information.                                                                                                                                                                                                                          |   |                                |                                                                                                                                                                                                  |
| Item 19               | 1 | Not provided.                                                                                               | 2 | Table 1.                                                                                                                                                                                                                                           | 1 | Not mentioned                  | 1 Not found                                                                                                                                                                                      |
| Item 20               | 2 | The cost of treatment was taken into consideration (Phase 2, paragraph 2; also reference 38).               | 3 | Cost-effectiveness is considered in phase 3&4.<br>"the Philippine guidelines recommend that the choice of drug for acute gouty arthritis be individualized taking into consideration drug efficacy, safety, and cost".<br>-4: no other information | 2 | Consider about the cost        | 3 Phase 2 ,paragraph 2                                                                                                                                                                           |
| Item 21               | 1 | Not provided.                                                                                               | 1 | -6: not mentioned.                                                                                                                                                                                                                                 | 1 | Not mentioned                  | 1 Not found                                                                                                                                                                                      |
| Item 22               | 1 | Not provided.                                                                                               | 1 | -6: not mentioned.                                                                                                                                                                                                                                 | 1 | Not mentioned                  | 1 Not found                                                                                                                                                                                      |
| Item 23               | 2 | Disclosures statements. This item can be inferred, but no detail was provided.                              | 4 | Disclosures.<br>-1: no methods.<br>-2: no statement of influence                                                                                                                                                                                   | 2 | Only mentioned the Disclosures | 2 Only one sentence: JLY serves as consultant to Novartis and trial investigator for Pfizer. EOS and JLL serve as trial investigators for Pfizer. Other members of TRC have nothing to disclose. |
| <b>SAMA_2003 [51]</b> |   |                                                                                                             |   |                                                                                                                                                                                                                                                    |   |                                |                                                                                                                                                                                                  |
| Item 1                | 6 | Section 1. Objective and scope. B) was only provided as epidemiological information (Epidemiology section). | 7 | "These guidelines have been developed to: provide an understanding of gout ; promote the cost-effective management of gout by doctors and other health care providers."                                                                            | 7 | All included                   | 6 Without the target                                                                                                                                                                             |
| Item 2                | 3 | Section 11. Management.                                                                                     | 3 | The questions can be inferred.                                                                                                                                                                                                                     | 3 | Not provided in questions      | 3 Is not easy to be found and don't cover all aspects                                                                                                                                            |
| Item 3                | 7 | Section 1. Objective and scope.                                                                             | 7 | Gout                                                                                                                                                                                                                                               | 7 | All included                   | 7 Well described                                                                                                                                                                                 |
| Item 4                | 5 | Annexure B. The disciplines were not provided. Methodologists were not clearly stated to be involved.       | 4 | Easy to find.<br>-1: only organization of each member is provided.<br>-1: no role of each member.<br>-1: no methodologist involved                                                                                                                 | 2 | Only mentioned the name        | 5 No expertise, not easy to be found                                                                                                                                                             |
| Item 5                | 1 | Not provided.                                                                                               | 1 | -6: not mentioned.                                                                                                                                                                                                                                 | 1 | Not mentioned                  | 2 Only mentions that consumer groups took part in.                                                                                                                                               |
| Item 6                | 4 | Section 1. Objective and scope. B) was not clearly provided.                                                | 5 | "Doctors and other health care providers"<br>"for reference and education only"<br>-2: not clearly stated, difficult to find.                                                                                                                      | 5 | Mentioned b                    | 4 No clear description of intended audience                                                                                                                                                      |
| Item 7                | 1 | Not provided.                                                                                               | 1 | -6: not mentioned.                                                                                                                                                                                                                                 | 1 | Not mentioned                  | 1 Not found                                                                                                                                                                                      |
| Item 8                | 1 | Not provided.                                                                                               | 1 | -6: not mentioned.                                                                                                                                                                                                                                 | 1 | Not mentioned                  | 1 Not found                                                                                                                                                                                      |
| Item 9                | 1 | Not provided.                                                                                               | 1 | -6: not mentioned.                                                                                                                                                                                                                                 | 1 | Not mentioned                  | 1 Not found                                                                                                                                                                                      |

|         |   |                                                                                                                                         |   |                                                                                                                                                                                                                                                                                                                            |   |                          |   |                                                                                                                                             |
|---------|---|-----------------------------------------------------------------------------------------------------------------------------------------|---|----------------------------------------------------------------------------------------------------------------------------------------------------------------------------------------------------------------------------------------------------------------------------------------------------------------------------|---|--------------------------|---|---------------------------------------------------------------------------------------------------------------------------------------------|
| Item 10 | 5 | Annexure A: Methodology.                                                                                                                | 5 | Annexure A: Methodology.<br>-2: no outcomes.                                                                                                                                                                                                                                                                               | 1 | Not mentioned            | 5 | In the method part                                                                                                                          |
| Item 11 | 7 | Section 11. Management.                                                                                                                 | 7 | Most informative: Allopurinol.                                                                                                                                                                                                                                                                                             | 7 | All included             | 5 | 16.4: no supporting data ,risks                                                                                                             |
| Item 12 | 3 | Only b) was provided.                                                                                                                   | 2 | -2: no description of how they used the evidence.<br>-1: not every recommendation is linked to a key evidence description/paragraph and/or reference list.<br>-2: no evidence summary.                                                                                                                                     | 3 | Informed recommendations | 3 | Some recommendations give the evidence                                                                                                      |
| Item 13 | 2 | Annexure A. A meeting revising the draft guideline was held.                                                                            | 4 | "The endorsement document was circulated to all participants and many other interested persons"<br>"Amendments to this endorsement draft were made where there was sufficient need as indicated by the comments received".<br>-1: no purpose.<br>-1: no outcomes.<br>-1: this is not a clear statement of external review. | 1 | Not mentioned            | 3 | It mentions Observer delegates                                                                                                              |
| Item 14 | 3 | Section 12. Disclaimer. It was inferred that the guideline might be updated.                                                            | 2 | "SAMA relies on the source of the national clinical guideline to provide updates and to notify us if the guideline protocol becomes outdated."<br>-5: this is not a clear statement of updating.                                                                                                                           | 1 | Not mentioned            | 5 | SAMA relies on the source of the national clinical guideline to provide updates and to notify us if the guideline protocol becomes outdated |
| Item 15 | 3 | A) and b) were not provided.                                                                                                            | 5 | -2: No purpose. Uncertainty is not clearly stated.                                                                                                                                                                                                                                                                         | 6 | Subtract 1               | 6 | Such as 16.3.3dmards                                                                                                                        |
| Item 16 | 6 | Section 11. Management. B) was provided for ULT use but was not provided in some recommendations (e.g., treatment of the acute attack). | 7 | All points are included.                                                                                                                                                                                                                                                                                                   | 7 | All included             | 6 | Well described                                                                                                                              |
| Item 17 | 7 | A 'Summarised Guideline' section was provided.                                                                                          | 4 | Figure 1 & 2.<br>Kind of "grouped together" in the summarized guideline.<br>-3: recommendations and explanations are not clearly distinguished. And in full guideline they are not grouped.                                                                                                                                | 7 | All included             | 6 | Well described                                                                                                                              |
| Item 18 | 1 | Not provided.                                                                                                                           | 1 | -6: not mentioned.                                                                                                                                                                                                                                                                                                         | 1 | Not mentioned            | 1 | Not found                                                                                                                                   |
| Item 19 | 1 | Not provided.                                                                                                                           | 5 | Figure 1 & 2.<br>The summarized guideline.<br>-2: no implementation section in the guideline.                                                                                                                                                                                                                              | 1 | Not mentioned            | 1 | Not found                                                                                                                                   |
| Item 20 | 2 | Section 11.2.3. The price of ACTH was considered.                                                                                       | 1 | -6: not mentioned.                                                                                                                                                                                                                                                                                                         | 1 | Not mentioned            | 1 | Not found                                                                                                                                   |
| Item 21 | 1 | Not provided.                                                                                                                           | 1 | -6: not mentioned.                                                                                                                                                                                                                                                                                                         | 1 | Not mentioned            | 1 | Not found                                                                                                                                   |
| Item 22 | 7 | Annexure A: Methodology.                                                                                                                | 7 | Annexure a: methodology                                                                                                                                                                                                                                                                                                    | 7 | All included             | 7 | Well described                                                                                                                              |

|                      |   |                                                                                       |   |                                                                                                                                                                                                     |   |                                                                        |   |                                                                                                                                                                                                              |
|----------------------|---|---------------------------------------------------------------------------------------|---|-----------------------------------------------------------------------------------------------------------------------------------------------------------------------------------------------------|---|------------------------------------------------------------------------|---|--------------------------------------------------------------------------------------------------------------------------------------------------------------------------------------------------------------|
| Item 23              | 1 | Not provided.                                                                         | 1 | -6: not mentioned.                                                                                                                                                                                  | 1 | Not mentioned                                                          | 1 | Not found                                                                                                                                                                                                    |
| <b>SER_2013 [46]</b> |   |                                                                                       |   |                                                                                                                                                                                                     |   |                                                                        |   |                                                                                                                                                                                                              |
| Item 1               | 7 | Page 21.                                                                              | 7 | Page 15, methodology, 1st paragraph.<br>Page 21 objective.                                                                                                                                          | 7 | All included                                                           | 7 | Well described                                                                                                                                                                                               |
| Item 2               | 6 | Table 1. A question list was provided but it did not cover all the guideline aspects. | 6 | Questions are listed but -1: the questions didn't cover the content of the guideline.                                                                                                               | 7 | All included                                                           | 6 | The questions don't cover all aspects                                                                                                                                                                        |
| Item 3               | 7 | Title.                                                                                | 7 | Gout                                                                                                                                                                                                | 7 | All included                                                           | 7 | Well described                                                                                                                                                                                               |
| Item 4               | 7 | Pages 10-14, 16. A methodologist reviewed the document (page 21).                     | 6 | Clear & easy to find.<br>Project Manager is an epidemiologist.<br>Reviewers are trained and experienced in systematic reviews.                                                                      | 7 | All included                                                           | 7 | Well recommendation                                                                                                                                                                                          |
| Item 5               | 5 | Page 16. A patient was involved in the development panel.                             | 5 | A patient is involved in the panel.<br>-2: the outcomes are not provided.                                                                                                                           | 5 | Missed d                                                               | 5 | There was also consensus on the participation of at least one nurse and one patient.                                                                                                                         |
| Item 6               | 4 | Chapter III. B) was not clearly given.                                                | 3 | The 2 aspects can be inferred from page 21 III.<br>-4: None of them is clearly described.                                                                                                           | 5 | How the guideline may be used by its target audience was not mentioned | 5 | Analysed from the article                                                                                                                                                                                    |
| Item 7               | 3 | Page 17. The names of databases searched were provided.                               | 3 | Only names of databases are provided.<br>-4: no other information.                                                                                                                                  | 3 | Provided a                                                             | 4 | C) and d) :not found                                                                                                                                                                                         |
| Item 8               | 1 | Not provided.                                                                         | 1 | -6: not provided.                                                                                                                                                                                   | 1 | Not mentioned                                                          | 1 | Not found                                                                                                                                                                                                    |
| Item 9               | 7 | Levels of Oxford Centre of Evidence Based Medicine.                                   | 7 | Oxford                                                                                                                                                                                              | 7 | All included                                                           | 7 | A title                                                                                                                                                                                                      |
| Item 10              | 3 | Chapter II. B) and c) were not provided.                                              | 5 | -2: outcomes are not provided.                                                                                                                                                                      | 3 | Used the Delphi method                                                 | 5 | No description of the detail                                                                                                                                                                                 |
| Item 11              | 7 | Chapters X-XI.                                                                        | 6 | -1: not all recommendations reflect the consideration of benefits and harms.                                                                                                                        | 7 | All included                                                           | 7 | Well described                                                                                                                                                                                               |
| Item 12              | 5 | Chapters II, X, XI. C) was not provided.                                              | 4 | -1: Most recommendations are linked to evidence descriptions, but a few are not.<br>-2: no evidence summary or evidence table.                                                                      | 6 | Subtract 1                                                             | 4 | No c)                                                                                                                                                                                                        |
| Item 13              | 2 | Information of external reviewers were given (page 21)                                | 2 | Page 21 "The CPG was assessed by two external reviewers, a rheumatologist expert in this clinical area (FPR) and a methodologist who was expert at conducting clinical practice guidelines (MJGY)". | 2 | The CPG was assessed by two external reviewers                         | 2 | Only one sentence: The CPG was assessed by two external reviewers, a rheumatologist expert in this clinical area (FPR) and a methodologist who was expert at conducting clinical practice guidelines (MJGY). |
| Item 14              | 5 | The CPG will be updated approximated                                                  | 7 | Page 21 "diffusion" part.                                                                                                                                                                           | 7 | All included                                                           | 7 | Update every 4 years                                                                                                                                                                                         |

|                      |   |                                                                                                                                                                           |   |                                                                                                                                                                                                                                                                                                                   |                            |                                   |                                                                                                                                                              |
|----------------------|---|---------------------------------------------------------------------------------------------------------------------------------------------------------------------------|---|-------------------------------------------------------------------------------------------------------------------------------------------------------------------------------------------------------------------------------------------------------------------------------------------------------------------|----------------------------|-----------------------------------|--------------------------------------------------------------------------------------------------------------------------------------------------------------|
|                      |   | every 4 years (page 21).                                                                                                                                                  |   |                                                                                                                                                                                                                                                                                                                   |                            |                                   |                                                                                                                                                              |
| Item 15              | 5 | Chapters X-XI. B) was not provided.                                                                                                                                       | 6 | -1: not all recommendations provide intent or purpose.                                                                                                                                                                                                                                                            | 7                          | All included                      | 5 No purpose                                                                                                                                                 |
| Item 16              | 6 | Chapters X-XI. B) was not provided for some recommendations.                                                                                                              | 7 | All points are included.                                                                                                                                                                                                                                                                                          | 7                          | All included                      | 7 Well described                                                                                                                                             |
| Item 17              | 4 | Chapters VI-XII. Recommendations were not grouped.                                                                                                                        | 4 | Recommendations are in bold.<br>There are some summary tables.<br>-3: recommendations are not grouped.                                                                                                                                                                                                            | m<br>i<br>s<br>e<br>d<br>b | All included                      | 5 No summary                                                                                                                                                 |
| Item 18              | 2 | The conflict between approved medication dosage and prescribed dosage in practice was mentioned (page 110, second paragraph).                                             | 4 | Page 15, methodology, 2nd paragraph.<br>-2: methods are not provided.<br>-1: description is not provided.                                                                                                                                                                                                         | 4                          | Mentioned barrier in METHODOLOGY  | 4 Some paragraphs mention the barriers but not clearly                                                                                                       |
| Item 19              | 2 | A "Quick Guide" was available but only in paper format (page 15).                                                                                                         | 5 | I.C how to use (page 15)<br>II.E Diffusion (page 21)<br>Table 11, 13,17.<br>-2: no direction on how to access the "Quick Guide".                                                                                                                                                                                  | 1                          | Not mentioned                     | 1 Not found                                                                                                                                                  |
| Item 20              | 2 | Cost information was presented (page 39 and reference 362).                                                                                                               | 3 | With some recommendations mentioning the cost-effective aspect of a drug/test ( page 39), they said that they don't consider costs in the recommendations(Page 17 II.C "it was explicitly requested that they be written based on the risk/benefit balance for the patient, regardless of the associated costs"). | 4                          | Cost information is mentioned     | 2 Only one sentence: it was explicitly requested that they be written based on the risk/benefit balance for the patient, regardless of the associated costs. |
| Item 21              | 1 | Not provided.                                                                                                                                                             | 1 | -6: not mentioned in the guideline.                                                                                                                                                                                                                                                                               | 1                          | Not mentioned                     | 1 Not found                                                                                                                                                  |
| Item 22              | 7 | Page 14                                                                                                                                                                   | 5 | Funding, page 14.<br>-2: not all names of funding companies are provided.                                                                                                                                                                                                                                         | 7                          | All included                      | 7 Well described                                                                                                                                             |
| Item 23              | 2 | Although it was stated that all members of the development group have made explicit statements of potential conflicts of interest (page 10), no further detail was given. | 2 | "All participants have made an explicit statement of their potential conflicts of interest".<br>-5: apart from the method, no other detail is provided.                                                                                                                                                           | 2                          | Described the competing interests | 2 Not clear                                                                                                                                                  |
| <b>SIR_2013 [45]</b> |   |                                                                                                                                                                           |   |                                                                                                                                                                                                                                                                                                                   |                            |                                   |                                                                                                                                                              |
| Item 1               | 7 | Abstract.                                                                                                                                                                 | 7 | Summary.<br>Well written & easy to find.                                                                                                                                                                                                                                                                          | 7                          | All included                      | 6 Can be found in the objectives and introduction                                                                                                            |
| Item 2               | 7 | Page 5. Four questions were provided.                                                                                                                                     | 7 | 4 queries are listed.                                                                                                                                                                                                                                                                                             | 7                          | All included                      | 6 In total 4 questions                                                                                                                                       |
| Item 3               | 7 | Abstract and Introduction section.                                                                                                                                        | 7 | Gout                                                                                                                                                                                                                                                                                                              | 7                          | All included                      | 7 Well described                                                                                                                                             |
| Item 4               | 6 | Page 4. The role of each member was not                                                                                                                                   | 6 | Easy to find.                                                                                                                                                                                                                                                                                                     | 6                          | Mentioned ab                      | 7 Can be found in the summary                                                                                                                                |

|         |   |                                                                                         |   |                                                                                                                                            |   |                                                                                                                         |                                                                                                                                                                                                                                                  |
|---------|---|-----------------------------------------------------------------------------------------|---|--------------------------------------------------------------------------------------------------------------------------------------------|---|-------------------------------------------------------------------------------------------------------------------------|--------------------------------------------------------------------------------------------------------------------------------------------------------------------------------------------------------------------------------------------------|
|         |   | provided.                                                                               |   | Evidence-based medicine experts are involved.<br>-1: role of each member is not provided.                                                  |   |                                                                                                                         |                                                                                                                                                                                                                                                  |
| Item 5  | 1 | Not provided.                                                                           | 1 | -6: patients with gout are not involved in the development process.                                                                        | 1 | Not mentioned                                                                                                           | 1 Not found                                                                                                                                                                                                                                      |
| Item 6  | 7 | Abstract (the last sentence) and Introduction section (the last paragraph).             | 4 | End of "introduction" part.<br>-3: no description of how the guideline may be used.                                                        | 6 | All included                                                                                                            | 6 It is not easy to be found : "This document is intended for rheumatologists, general practitioners, internists, geriatricians, nephrologists, cardiologists and all healthcare professionals involved in the management of patients with gout" |
| Item 7  | 4 | Materials and Methods section. C) and d) were not provided.                             | 4 | "Methods" part.<br>-1: no search terms.<br>-2: no fully search strategy.                                                                   | 4 | The literature search was conducted in November 2011 in the following databases: MEDLINE, Embase, and Cochrane Central. | 4 C) and d) are not found                                                                                                                                                                                                                        |
| Item 8  | 7 | Page 6.                                                                                 | 7 | "Methods" part.<br>Clear & easy to find.                                                                                                   | 7 | All included                                                                                                            | 6 Can be found in the methods                                                                                                                                                                                                                    |
| Item 9  | 5 | Page 6 and Table I. The level of evidence was only evaluated based on the study design. | 7 | Same as EULAR, Oxford.                                                                                                                     | 7 | All included                                                                                                            | 6 A single figure and methods                                                                                                                                                                                                                    |
| Item 10 | 3 | Materials and Methods section. B) and c) were not provided.                             | 5 | -2: the outcomes are not provided.                                                                                                         | 6 | Subtract 1                                                                                                              | 3 Not found all of them                                                                                                                                                                                                                          |
| Item 11 | 7 | Results section.                                                                        | 6 | Most informative: recommendation 4.<br>-1: not all recommendations reflect the consideration of benefits and harms.(e.g. Recommendation 6) | 7 | All included                                                                                                            | 5 Some recommends have                                                                                                                                                                                                                           |
| Item 12 | 5 | Results section. The evidence summary/table was not provided.                           | 5 | -2: evidence summaries or evidence tables are not provided.                                                                                | 6 | Subtract 1                                                                                                              | 6 A figure                                                                                                                                                                                                                                       |
| Item 13 | 2 | Published in a peer reviewed journal.                                                   | 1 | -6: not mentioned.                                                                                                                         | 1 | Not mentioned                                                                                                           | 1 Not found                                                                                                                                                                                                                                      |
| Item 14 | 1 | Not provided.                                                                           | 1 | -6: not mentioned.                                                                                                                         | 1 | Not mentioned                                                                                                           | 1 It's the update of 2006                                                                                                                                                                                                                        |
| Item 15 | 7 | Results section.                                                                        | 6 | Most of the recommendations are specific and unambiguous.<br>-1: purpose of recommendations are not all provided.                          | 6 | Subtract 1                                                                                                              | 6 Well described                                                                                                                                                                                                                                 |
| Item 16 | 7 | Results section.                                                                        | 7 | All points are included.                                                                                                                   | 7 | All included                                                                                                            | 6 Well described                                                                                                                                                                                                                                 |



|                      |   |                                                                                                                                                                                                                     |   |                                                                                                                                                                                                                                      |   |                                               |   |                                                  |
|----------------------|---|---------------------------------------------------------------------------------------------------------------------------------------------------------------------------------------------------------------------|---|--------------------------------------------------------------------------------------------------------------------------------------------------------------------------------------------------------------------------------------|---|-----------------------------------------------|---|--------------------------------------------------|
| Item 17              | 4 | Results section. B) was not provided.                                                                                                                                                                               | 4 | Table IV.<br>Recommendations are in bold.<br>-3: recommendations are not grouped. ( the 3 levels are listed, but recommendations are not grouped by the levels.)                                                                     | 4 | A is not concluded                            | 4 | It has a figure but the figure doesn't cover all |
| Item 18              | 2 | Page 10. The availability of treatments in Italy was discussed.                                                                                                                                                     | 4 | The guideline emphasizes that it was designed to adapt to Italian, considering current therapeutic options available in Italian.-1: no description. Table 2 & the explanation below the table, Page 12.-2: Methods are not provided. | 1 | Not mentioned                                 | 3 | Only some aspects included                       |
| Item 19              | 1 | Not provided.                                                                                                                                                                                                       | 1 | -6: not mentioned.                                                                                                                                                                                                                   | 1 | Not mentioned                                 | 1 | Not found                                        |
| Item 20              | 4 | Pages 6, 7, 15. Cost effectiveness was taken into consideration in the voting, but no detailed information was provided.                                                                                            | 6 | Recommendation 1.<br>"Methods", end of page 6.<br>-1: description of the cost information is not provided.                                                                                                                           | 4 | Included cost effectiveness                   | 4 | Some described the cost                          |
| Item 21              | 1 | Not provided.                                                                                                                                                                                                       | 1 | -6: not mentioned.                                                                                                                                                                                                                   | 1 | Not mentioned                                 | 1 | Not found                                        |
| Item 22              | 1 | Not provided.                                                                                                                                                                                                       | 1 | -6: not mentioned.                                                                                                                                                                                                                   | 1 | Not mentioned                                 | 1 | Not found                                        |
| Item 23              | 1 | Not provided.                                                                                                                                                                                                       | 1 | -6: not mentioned.                                                                                                                                                                                                                   | 1 | Not mentioned                                 | 1 | Not found                                        |
| <b>T2T_2016 [39]</b> |   |                                                                                                                                                                                                                     |   |                                                                                                                                                                                                                                      |   |                                               |   |                                                  |
| Item 1               | 6 | Introduction section (the last paragraph). Contents of this item were not easy to find.                                                                                                                             | 7 | To improve the management of gout in clinical practice & "recommendations aimed at defining a treatment target and initiate a T2T programme for gout".<br>Well written, easy to find.                                                | 5 | All included                                  | 7 | In the abstract                                  |
| Item 2               | 7 | Table 3.                                                                                                                                                                                                            | 7 | Table 1.                                                                                                                                                                                                                             | 7 | Contained "ab"                                | 7 | Can be found in the abstract and                 |
| Item 3               | 7 | Abstract.                                                                                                                                                                                                           | 7 | Gout                                                                                                                                                                                                                                 | 7 | All included                                  | 7 | Can be found in the abstract                     |
| Item 4               | 5 | Pages 1&5. A) was not provided. No methodologist was involved.                                                                                                                                                      | 6 | Easy to find.<br>-1: no methodologist involved in the development group.                                                                                                                                                             | 5 | Not mentioned a                               | 5 | The name of group is unknown                     |
| Item 5               | 5 | A patient was included in the international task force, but c) was not provided.                                                                                                                                    | 5 | -2: the outcome is not provided.                                                                                                                                                                                                     | 5 | Page 2 mentioned                              | 5 | A patient with gout                              |
| Item 6               | 1 | Not provided.                                                                                                                                                                                                       | 1 | -6: not described.                                                                                                                                                                                                                   | 2 | Only mentioned "To improve the management of" | 1 | Not found                                        |
| Item 7               | 7 | Methods section and Supplementary 1&2.                                                                                                                                                                              | 7 | Table S1 & S2                                                                                                                                                                                                                        | 7 | All included                                  | 7 | In the appendix                                  |
| Item 8               | 7 | Supplementary 1 - Eligible criteria.                                                                                                                                                                                | 7 | Table S1.                                                                                                                                                                                                                            | 6 | All included                                  | 6 | In the method                                    |
| Item 9               | 7 | Methods section. Evidences were assessed using a system provided by the Oxford Centre for Evidence-Based Medicine ( <a href="http://www.cebm.net/oxford-centre-eviden">http://www.cebm.net/oxford-centre-eviden</a> | 7 | Oxford level of evidence.                                                                                                                                                                                                            | 6 | Contained a                                   | 6 | In the method                                    |

|         |   |                                                                                                                                                                               |   |                                                                                                                                                                                                                                                    |   |                                                                                   |   |                                                                                   |
|---------|---|-------------------------------------------------------------------------------------------------------------------------------------------------------------------------------|---|----------------------------------------------------------------------------------------------------------------------------------------------------------------------------------------------------------------------------------------------------|---|-----------------------------------------------------------------------------------|---|-----------------------------------------------------------------------------------|
|         |   | ce-based-medicine-levels-evidence-march-2009/).                                                                                                                               |   |                                                                                                                                                                                                                                                    |   |                                                                                   |   |                                                                                   |
| Item 10 | 7 | Methods section. And results were provided as table 1.                                                                                                                        | 7 | Methods.<br>Table 1.                                                                                                                                                                                                                               | 6 | All included                                                                      | 6 | The last paragraph of the methods                                                 |
| Item 11 | 3 | Results section. A) and b) were not provided for individual recommendations but the grade of recommendation, level of evidence, and strength of recommendation were provided. | 4 | Supporting data and report of benefits are in the "result" part. Recommendations reflect the consideration.<br>-2: supporting data and report of harms are not mentioned.<br>-1: It's only a summary of all evidence, not for each recommendation. | 2 | Supporting data and report of benefits                                            | 4 | The recommendation is not clear                                                   |
| Item 12 | 3 | Results section. B) and c) were not provided for individual recommendations.                                                                                                  | 5 | Methods part, Result part & Table 2.<br>-2: no key evidence description for each recommendation.                                                                                                                                                   | 3 | C mentioned                                                                       | 5 | A single figure gives the link                                                    |
| Item 13 | 2 | Page 6.                                                                                                                                                                       | 2 | Only "externally peer reviewed".<br>-5: no other information.                                                                                                                                                                                      | 2 | Only mentioned c                                                                  | 1 | The last paragraph said no external review                                        |
| Item 14 | 1 | Not provided.                                                                                                                                                                 | 5 | Updated information and services can be found at:<br><a href="http://ard.bmj.com/content/early/2016/09/22/annrheumdis-2016-209467">http://ard.bmj.com/content/early/2016/09/22/annrheumdis-2016-209467</a><br>-2: No time interval.                | 1 | Not mentioned                                                                     | 1 | Not found                                                                         |
| Item 15 | 4 | Results section. B) and d) were not provided for individual recommendations.                                                                                                  | 6 | Some purposes of recommendations are not clearly stated.                                                                                                                                                                                           | 5 | Subtract 1                                                                        | 5 | Can be found in the recommendations, but the recommendations are not clear enough |
| Item 16 | 6 | Results section. Some recommendations did not clarify the most appropriate population.                                                                                        | 7 | All points are included.                                                                                                                                                                                                                           | 6 | Subtract 1                                                                        | 6 | Well described                                                                    |
| Item 17 | 7 | Recommendations were summarized in table 2 and grouped in page 3.                                                                                                             | 7 | Table 2.<br>Recommendations are grouped                                                                                                                                                                                                            | 6 | All included                                                                      | 6 | Figure                                                                            |
| Item 18 | 3 | Page 5, paragraph 5. A) and b) were not provided.                                                                                                                             | 1 | -6: No description of facilitators or barriers to application.                                                                                                                                                                                     | 3 | Mentioned in discussion                                                           | 1 | Not found                                                                         |
| Item 19 | 1 | Not provided.                                                                                                                                                                 | 1 | -6: No description about implementation.                                                                                                                                                                                                           | 1 | Not mentioned                                                                     | 1 | Not found                                                                         |
| Item 20 | 1 | Not provided.                                                                                                                                                                 | 1 | -6: No description about resource or cost.                                                                                                                                                                                                         | 1 | Not mentioned                                                                     | 1 | Not found                                                                         |
| Item 21 | 1 | Not provided.                                                                                                                                                                 | 1 | -6: Such criteria are not provided.                                                                                                                                                                                                                | 1 | Not mentioned                                                                     | 1 | Not found                                                                         |
| Item 22 | 4 | Page 5. B) was not provided.                                                                                                                                                  | 4 | Funding.<br>-3: No statement that the funding body did not influence the content of the guideline.                                                                                                                                                 | 3 | No statement that the funding body did not influence the content of the guideline | 3 | No statements                                                                     |
| Item 23 | 2 | Pages 5-6. A), b) and d) were not provided.                                                                                                                                   | 4 | Competing interest.                                                                                                                                                                                                                                | 6 | All included                                                                      | 6 | The competing interests state                                                     |

|                      |   |                                                                                                                                                                                                      |   |                                                                                                                                                                                                                                                                                                                                                                     |   |                    |   |                                                  |
|----------------------|---|------------------------------------------------------------------------------------------------------------------------------------------------------------------------------------------------------|---|---------------------------------------------------------------------------------------------------------------------------------------------------------------------------------------------------------------------------------------------------------------------------------------------------------------------------------------------------------------------|---|--------------------|---|--------------------------------------------------|
|                      |   |                                                                                                                                                                                                      |   | -1: methods by which the information were sought are not described.<br>-2: No description of the influence.                                                                                                                                                                                                                                                         |   |                    |   |                                                  |
| <b>TRA_2016 [38]</b> |   |                                                                                                                                                                                                      |   |                                                                                                                                                                                                                                                                                                                                                                     |   |                    |   |                                                  |
| Item 1               | 5 | Title and Chapter 1 - Abstract. B) was not provided and the contents were not easy to find.                                                                                                          | 6 | The introduction part & epidemiology.<br>-1: easy to find, but the objective is not specifically described.                                                                                                                                                                                                                                                         | 6 | Missed b           | 6 | 1' for the performance                           |
| Item 2               | 3 | A question list was not provided but the clinical topic can be inferred.                                                                                                                             | 3 | -4: No specifically described question is provided in the guideline.                                                                                                                                                                                                                                                                                                | 3 | Contained "ab"     | 5 | Analysed from the article                        |
| Item 3               | 7 | Title and Chapter 1 - Abstract.                                                                                                                                                                      | 7 | Hua                                                                                                                                                                                                                                                                                                                                                                 | 7 | All included       | 7 | Well described                                   |
| Item 4               | 5 | Page1. The role of each member was not provided and a methodologist was not involved.                                                                                                                | 5 | Easy to find.<br>-1: no description of member's role.<br>-1: No methodologist include.                                                                                                                                                                                                                                                                              | 5 | Mentioned ab       | 5 | No discipline expertise, performance             |
| Item 5               | 1 | Not provided.                                                                                                                                                                                        | 1 | '-6: The views and preferences of the target population are not mentioned.                                                                                                                                                                                                                                                                                          | 3 | Mentioned a        | 1 | Not found                                        |
| Item 6               | 4 | Preface. B) was not clearly provided.                                                                                                                                                                | 7 | "to provide important reference for medical workers and patients with gout and HUA"                                                                                                                                                                                                                                                                                 | 1 | Not mentioned      | 3 | Can be found in the last sentence of the preface |
| Item 7               | 1 | Not provided.                                                                                                                                                                                        | 1 | -6: Searching method is no provided.                                                                                                                                                                                                                                                                                                                                | 1 | Not mentioned      | 1 | Not found                                        |
| Item 8               | 1 | Not provided.                                                                                                                                                                                        | 1 | -6: Criteria are no provided.                                                                                                                                                                                                                                                                                                                                       | 2 | Outcomes mentioned | 1 | Not found                                        |
| Item 9               | 1 | Not provided.                                                                                                                                                                                        | 1 | -6: Strengths and Limitations of The Evidence are not described.                                                                                                                                                                                                                                                                                                    | 1 | Not mentioned      | 1 | Not found                                        |
| Item 10              | 1 | Not provided.                                                                                                                                                                                        | 2 | The guideline was developed though discussion of experts from multi-discipline.<br>-5: No any other details about the formulation (detailed process, outcomes or influence) is provided.                                                                                                                                                                            | 1 | Not mentioned      | 1 | Not found                                        |
| Item 11              | 6 | Pages 15-22. A) and b) were not provided in recommendation 2 - pharmacological treatment for acute gouty arthritis.                                                                                  | 6 | Most informative examples: Page 15 "management of asymptomatic HUA".<br>-1: Not all recommendations provide supporting data of benefits and harms (e.g. Page 18 "colchicine" & "corticosteroid").                                                                                                                                                                   | 5 | Subtract 1         | 5 | Some of the recommendation have the a),b) and c) |
| Item 12              | 2 | Pages 15-22. B) and c) were not provided in recommendation 3 - treatment for chronic gouty arthritis. A) was not provided in recommendation 2 - pharmacological treatment for acute gouty arthritis. | 2 | Some recommendations (e.g. Page 24 "direction of daily life and diet") are linked to evidence description.<br>-2: How they linked and used the evidence to inform recommendations are not described.<br>-2: No link between recommendations and evidence summary.<br>-1: Not all recommendations include an evidence description (e.g. Page 22 "Sulfinpyrazone" ) . | 4 | Missed a           | 2 | Just a little                                    |

|                           |   |                                                                                                                                        |   |                                                                                                                                                          |   |                                                                |   |                                                      |
|---------------------------|---|----------------------------------------------------------------------------------------------------------------------------------------|---|----------------------------------------------------------------------------------------------------------------------------------------------------------|---|----------------------------------------------------------------|---|------------------------------------------------------|
| Item 13                   | 2 | Published in a peer reviewed journal.                                                                                                  | 1 | -6: No description about external review.                                                                                                                | 1 | Not mentioned                                                  | 1 | Not found                                            |
| Item 14                   | 1 | Not provided.                                                                                                                          | 1 | -6: No statement about updating.                                                                                                                         | 1 | Not mentioned                                                  | 1 | Not found                                            |
| Item 15                   | 6 | Pages 15-22. B) and c) were not provided in recommendation 3 - treatment for chronic gouty arthritis.                                  | 6 | Not all recommendations provide purpose (e.g. Page 23 prevention of gout).                                                                               | 5 | Subtract 1                                                     | 5 | Not all recommendations have every aspect            |
| Item 16                   | 7 | Pages 15-22.                                                                                                                           | 7 | The different options for management of the condition or health issue are clearly presented.                                                             | 6 | All included                                                   | 6 | Well described                                       |
| Item 17                   | 7 | Pharmacological treatments for acute gouty arthritis were summarized in Table 3. Recommendations were grouped in Chapter 1 - Abstract. | 7 | Table 2 & 3 & so on.<br>Image 7 & 8 & so on.<br>Specific recommendation are grouped.                                                                     | 6 | All included                                                   | 6 | Figure and table                                     |
| Item 18                   | 1 | Not provided.                                                                                                                          | 1 | -6: No description of facilitators or barriers to application.                                                                                           | 1 | Not mentioned                                                  | 1 | Not found                                            |
| Item 19                   | 1 | Not provided.                                                                                                                          | 3 | The abstract is a good summary.<br>-1: but the abstract is not designed as an implementation tool.<br>-3: No any other information about implementation. | 1 | Not mentioned                                                  | 1 | Not found                                            |
| Item 20                   | 2 | Appendix - Part III.                                                                                                                   | 3 | Page 27 Supplementary Part III . So cost is considered.<br>-4: Other information about cost is not provided.                                             | 2 | Mentioned in page27                                            | 2 | Mentions health insurance rule                       |
| Item 21                   | 1 | Not provided.                                                                                                                          | 1 | -6: No description of monitoring or auditing.                                                                                                            | 1 | Not mentioned                                                  | 1 | Not found                                            |
| Item 22                   | 1 | Not provided.                                                                                                                          | 1 | -6: There's no such description about funding body.                                                                                                      | 1 | Not mentioned                                                  | 1 | Not found                                            |
| Item 23                   | 1 | Not provided.                                                                                                                          | 1 | -6: There's no such description about competing interests.                                                                                               | 1 | Not mentioned                                                  | 1 | Not found                                            |
| <b>UTAustin_2009 [52]</b> |   |                                                                                                                                        |   |                                                                                                                                                          |   |                                                                |   |                                                      |
| Item 1                    | 7 | Sections - Scope and Benefits/Harms of Implementing the Guideline Recommendations.                                                     | 7 | "To present a national guideline on the management of acute gout in adults"<br>expected benefit: potential benefits.                                     | 7 | All included                                                   | 7 | Well described                                       |
| Item 2                    | 3 | Clinical topics can be inferred from the Recommendations section.                                                                      | 3 | "Interventions and Practices Considered" are not questions.                                                                                              | 2 | Not provided in questions                                      | 3 | It doesn't state the questions or cover every aspect |
| Item 3                    | 7 | Section - Scope.                                                                                                                       | 7 | "Adults in the general population diagnosed with or with symptoms indicative of gout (acute attack)"                                                     | 7 | All included                                                   | 7 | Well described                                       |
| Item 4                    | 4 | Section - Identifying information and availability. Only the names of authors and institutes were provided.                            | 2 | Only the names of development groups are stated.                                                                                                         | 2 | Mentioned the name                                             | 4 | No expertise, institution, role description          |
| Item 5                    | 1 | Not sought.                                                                                                                            | 1 | -6: not mentioned.                                                                                                                                       | 1 | Not mentioned                                                  | 1 | Not found                                            |
| Item 6                    | 4 | Section - Scope. B) was not clearly stated.                                                                                            | 4 | "Advanced Practice Nurses, Dietitians, Nurses, Physician Assistants, Physicians, Podiatrists"<br>-3: no description of how to use.                       | 4 | Presented a national guideline on the management of acute gout | 4 | B) is not stated                                     |

|         |   |                                                                                                                                                      |   |                                                                                                                                                                                    |                                 |                                                                                                                                                                                                                                              |   |                                                         |
|---------|---|------------------------------------------------------------------------------------------------------------------------------------------------------|---|------------------------------------------------------------------------------------------------------------------------------------------------------------------------------------|---------------------------------|----------------------------------------------------------------------------------------------------------------------------------------------------------------------------------------------------------------------------------------------|---|---------------------------------------------------------|
|         |   |                                                                                                                                                      |   |                                                                                                                                                                                    | in adults and Target Population |                                                                                                                                                                                                                                              |   |                                                         |
| Item 7  | 4 | Section - Methodology. B) and d) were not provided.                                                                                                  | 4 | Names of databases and key words are provided.                                                                                                                                     | 4                               | Searches were conducted via electronic databases including UpToDate, Cochrane Library, Pubmed, CINAHL, and MEDLINE using keywords: "allopurinol", "colchicine", "corticosteroids", "diet", "febuxostat", "gout", "initial", and "treatment." | 5 | In methods and appendix, but it is not easy to be found |
| Item 8  | 1 | Not provided.                                                                                                                                        | 1 | The information is not provided.                                                                                                                                                   | 1                               | Not mentioned                                                                                                                                                                                                                                | 5 | No study design                                         |
| Item 9  | 7 | Section - Methodology. A 3-point rating scheme was used.                                                                                             | 7 | The "rating scheme"                                                                                                                                                                | 7                               | All included                                                                                                                                                                                                                                 | 7 | Well described                                          |
| Item 10 | 3 | Section - Methodology. Informal consensus was used as the method to formulate recommendations.                                                       | 2 | "Informal Consensus"<br>-5: no detailed information                                                                                                                                | 1                               | Not mentioned                                                                                                                                                                                                                                | 4 | Informal consensus                                      |
| Item 11 | 4 | Section - Recommendations. Reports of both benefits and harms were provided but no supporting data for harms was given. C) and d) were not provided. | 4 | '-1 :not all recommendations reflect the consideration of benefits and harms. (e.g. "discontinue drugs associated with gout when possible)". -2: supporting data are not provided. | 6                               | Subtract 1                                                                                                                                                                                                                                   | 3 | No supporting data                                      |
| Item 12 | 5 | Methodology and Recommendations section. c) was not provided.                                                                                        | 5 | Evidence summaries or tables are not provided.                                                                                                                                     | 5                               | No describes how the guideline development group linked and used the evidence to inform recommendations                                                                                                                                      | 6 | Well described                                          |
| Item 13 | 2 | Section - Methodology. It was stated that external review was conducted, but no detailed information was given.                                      | 2 | "External Peer Review"<br>-5: no detailed information.                                                                                                                             | 2                               | Only mentioned External Peer Review                                                                                                                                                                                                          | 2 | External peer review                                    |
| Item 14 | 1 | Not provided.                                                                                                                                        | 1 | -6: not mentioned.                                                                                                                                                                 | 1                               | Not mentioned                                                                                                                                                                                                                                | 1 | Not found                                               |
| Item 15 | 3 | Section - Recommendations. A) and b) were not provided.                                                                                              | 5 | No purpose. No uncertainty.                                                                                                                                                        | 6                               | Subtract 1                                                                                                                                                                                                                                   | 5 | Well described                                          |
| Item 16 | 4 | First, second, and third line                                                                                                                        | 6 | -1:some options are not provided with the most appropriate                                                                                                                         | 6                               | Subtract 1                                                                                                                                                                                                                                   | 5 | Well described                                          |

|         |   |                                                                                                              |   |                                                                                                                                                          |   |                                                                                                           |   |                                                                                         |
|---------|---|--------------------------------------------------------------------------------------------------------------|---|----------------------------------------------------------------------------------------------------------------------------------------------------------|---|-----------------------------------------------------------------------------------------------------------|---|-----------------------------------------------------------------------------------------|
|         |   | pharmacological options were provided but b) was not given.                                                  |   | population or clinical situation. (e.g. Vitamin c)                                                                                                       |   |                                                                                                           |   |                                                                                         |
| Item 17 | 4 | Section - Recommendations. Recommendations were not presented in a grouped format.                           | 7 | This is a summary. Recommendations are grouped.                                                                                                          | 7 | All included                                                                                              | 3 | No box or others                                                                        |
| Item 18 | 1 | Not provided.                                                                                                | 2 | "Benefits/Harms of Implementing the Guideline Recommendations" exists. But it's not all about facilitators and barriers of application of the guideline. | 1 | Not mentioned                                                                                             | 1 | Not found                                                                               |
| Item 19 | 1 | Not provided.                                                                                                | 3 | "Benefits/Harms of Implementing the Guideline Recommendations" exists. But it's not all about implementation advice or tools.                            | 1 | Not mentioned                                                                                             | 1 | Not found                                                                               |
| Item 20 | 1 | Cost-analysis was not performed.                                                                             | 1 | -6:"A formal cost analysis was not performed and published cost analyses were not reviewed"                                                              | 1 | Not mentioned                                                                                             | 2 | A formal cost analysis was not performed and published cost analyses were not reviewed. |
| Item 21 | 1 | Not provided.                                                                                                | 1 | -6: not mentioned.                                                                                                                                       | 1 | Not mentioned                                                                                             | 1 | Not found                                                                               |
| Item 22 | 4 | Section - Identifying information and availability. The source of funding was provided but b) was not given. | 4 | Source of funding. -3: not statement of influence.                                                                                                       | 4 | Source(s) of Funding: University of Texas at Austin, School of Nursing, Family Nurse Practitioner Program | 4 | Only mentions ,but unclear                                                              |
| Item 23 | 2 | None stated.                                                                                                 | 1 | -6: Not stated.                                                                                                                                          | 1 | Not mentioned                                                                                             | 1 | Not found                                                                               |

**Supplementary Table 8. Original and modified scores for the individual AGREE II domain items and reasons for modification**

N: Not scored.

| Document     | Item no | Reviewer ID | Original score | Modified score | Reason                                                                                                                                                                                                                                                       |
|--------------|---------|-------------|----------------|----------------|--------------------------------------------------------------------------------------------------------------------------------------------------------------------------------------------------------------------------------------------------------------|
| 3e_2013 [36] | 2       | #1          | 5              | 7              | Principal clinical questions were listed in table 1. Scoring criteria for this item were clarified.                                                                                                                                                          |
| 3e_2013 [36] | 3       | #1          | 5              | 7              | Abstract and Introduction.                                                                                                                                                                                                                                   |
| 3e_2013 [36] | 4       | #1          | 5              | 7              | Roles in contributors were provided on page 6.                                                                                                                                                                                                               |
| 3e_2013 [36] | 10      | #1          | 7              | 5              | Although a modified Delphi process was adopted, c) was not provided.                                                                                                                                                                                         |
| 3e_2013 [36] | 17      | #1          | 7              | 4              | Recommendations were not grouped in a certain section.                                                                                                                                                                                                       |
| 3e_2013 [36] | 2       | #2          | 6              | 7              | The scoring criteria were clarified after discussion.                                                                                                                                                                                                        |
| 3e_2013 [36] | 3       | #2          | 1              | 7              | Patient with "gout", easy to find.                                                                                                                                                                                                                           |
| 3e_2013 [36] | 7       | #2          | 7              | 6              | -1: the searched time periods are not provided.                                                                                                                                                                                                              |
| 3e_2013 [36] | 8       | #2          | 6              | 2              | There is a description of inclusion & exclusion criteria.<br>-5: target population characteristics, study design or outcomes are not included in the criteria.                                                                                               |
| 3e_2013 [36] | 9       | #2          | 6              | 7              | "The level of evidence for each recommendation was appraised and graded in accordance with the Oxford Centre for Evidence-based Medicine Levels of Evidence".<br>Pooled data were "sufficiently homogeneous".                                                |
| 3e_2013 [36] | 10      | #2          | 7              | 5              | -2: No outcomes of the process.                                                                                                                                                                                                                              |
| 3e_2013 [36] | 13      | #2          | 2              | 4              | The scoring criteria were clarified after discussion.<br>-1 : The purpose and intent of external review is not provided.<br>-1: the outcome/information gathered from the external review is not described.<br>-1: the external reviewers are not described. |
| 3e_2013 [36] | 15      | #2          | 2              | 6              | The most informative: recommendation 5.<br>-1: Not all recommendations are specific enough. Example: recommendation 9, information about surgery doesn't include all the required aspects.                                                                   |
| 3e_2013 [36] | 16      | #2          | 3              | 7              | The different options for management of the condition or health issue are clearly presented.                                                                                                                                                                 |
| 3e_2013 [36] | 17      | #2          | 7              | 4              | Table 2.                                                                                                                                                                                                                                                     |

|                    |    |    |   |   |                                                                                                                                       |
|--------------------|----|----|---|---|---------------------------------------------------------------------------------------------------------------------------------------|
|                    |    |    |   |   | -3: recommendations are not grouped in the guideline.                                                                                 |
| 3e_2013 [36]       | 18 | #2 | 2 | 7 | Barriers: recommendation 1.<br>Facilitators: Table 3 & "Discussion" part.                                                             |
| 3e_2013 [36]       | 20 | #2 | 2 | 6 | Example: recommendation 1 & 5.<br>-1: Information/description of the cost information that emerged from the inquiry is not described. |
| 3e_2013 [36]       | 21 | #2 | 4 | 1 | The scoring criteria were clarified after discussion. I misunderstood this item.                                                      |
| 3e_2013 [36]       | 4  | #3 | 1 | 7 | The guideline development group is stated                                                                                             |
| 3e_2013 [36]       | 1  | #4 | 3 | 7 | Scoring criteria modified                                                                                                             |
| 3e_2013 [36]       | 3  | #4 | 1 | 7 | Scoring criteria modified                                                                                                             |
| 3e_2013 [36]       | 8  | #4 | 5 | 4 | The description is unclear                                                                                                            |
| 3e_2013 [36]       | 9  | #4 | 5 | 7 | Scoring criteria modified                                                                                                             |
| 3e_2013 [36]       | 12 | #4 | 5 | 7 | Scoring criteria modified                                                                                                             |
| 3e_2013 [36]       | 13 | #4 | 1 | 5 | Peer review                                                                                                                           |
| 3e_2013 [36]       | 15 | #4 | 5 | 7 | Scoring criteria modified                                                                                                             |
| 3e_2013 [36]       | 16 | #4 | 4 | 7 | Scoring criteria modified                                                                                                             |
| 3e_2013 [36]       | 18 | #4 | 4 | 6 | Scoring criteria modified                                                                                                             |
| 3e_2013 [36]       | 19 | #4 | 3 | 1 | Scoring criteria modified                                                                                                             |
| 3e_2013 [36]       | 20 | #4 | 2 | 5 | Scoring criteria modified                                                                                                             |
| 3e_2013 [36]       | 21 | #4 | 5 | 1 | Not found                                                                                                                             |
| 3e_2013 [36]       | 23 | #4 | 2 | 4 | Scoring criteria modified                                                                                                             |
| 3e_AU_NZ_2015 [43] | 2  | #1 | 6 | 5 | A set of clinical questions were investigated (page 342) but the question list was not provided.                                      |
| 3e_AU_NZ_2015 [43] | 4  | #1 | 6 | 7 | Rachelle BUCHBINDER was the methodologist.                                                                                            |
| 3e_AU_NZ_2015 [43] | 18 | #1 | 1 | 6 | Discussion, paragraph 2                                                                                                               |
| 3e_AU_NZ_2015 [43] | 8  | #2 | 5 | 7 | It is described in References 7-16.                                                                                                   |
| 3e_AU_NZ_2015 [43] | 9  | #2 | 1 | 7 | It is described in References 7-16.                                                                                                   |
| 3e_AU_NZ_2015 [43] | 10 | #2 | 5 | 6 | Not all outcomes are missing, some are described.                                                                                     |
| 3e_AU_NZ_2015 [43] | 6  | #3 | 7 | 4 | No clear description of intended guideline audience                                                                                   |
| 3e_AU_NZ_2015 [43] | 16 | #3 | 2 | 5 | Only some options are provided with the most appropriate population or clinical situation.                                            |
| 3e_AU_NZ_2015 [43] | 2  | #4 | 7 | 5 | The scoring criteria was specified/modified/clarified and the score was modified                                                      |



|                    |    |    |   |   |                                                                                                                                                        |
|--------------------|----|----|---|---|--------------------------------------------------------------------------------------------------------------------------------------------------------|
|                    |    |    |   |   | accordingly                                                                                                                                            |
| 3e_AU_NZ_2015 [43] | 3  | #4 | 5 | 6 | 1' for performance                                                                                                                                     |
| 3e_AU_NZ_2015 [43] | 4  | #4 | 5 | 6 | There is a methodologist                                                                                                                               |
| 3e_AU_NZ_2015 [43] | 9  | #4 | 5 | 7 | All included                                                                                                                                           |
| 3e_AU_NZ_2015 [43] | 15 | #4 | 7 | 6 | No purpose                                                                                                                                             |
| 3e_AU_NZ_2015 [43] | 17 | #4 | 6 | 4 | Scoring criteria modified                                                                                                                              |
| 3e_AU_NZ_2015 [43] | 20 | #4 | 5 | 3 | Only one phase mentions the cost without methods                                                                                                       |
| 3e_PT_2014 [40]    | 1  | #1 | 5 | 6 | Scoring criteria clarified. Epidemiological information provided.                                                                                      |
| 3e_PT_2014 [40]    | 4  | #1 | 5 | 5 | Bibliographic fellows were considered as methodologists but the role of each member was not fully provided.                                            |
| 3e_PT_2014 [40]    | 6  | #1 | 4 | 1 | Can not be fully inferred from "in daily clinical practice"                                                                                            |
| 3e_PT_2014 [40]    | 10 | #1 | 7 | 3 | Although Delphi approach was adopted, b) and c) were not provided                                                                                      |
| 3e_PT_2014 [40]    | 18 | #1 | 2 | 4 | The voting and discussion on willingness of applying the guideline in daily practice (table IV) was considered as a facilitator.                       |
| 3e_PT_2014 [40]    | 19 | #1 | 2 | 1 | The voting and discussion on willingness of applying the guideline in daily practice (table IV) was not considered as a pilot test for implementation. |
| 3e_PT_2014 [40]    | 4  | #2 | 6 | 5 | The development group members are not completely listed.                                                                                               |
| 3e_PT_2014 [40]    | 15 | #2 | 7 | 6 | Some purposes of recommendations are not clearly stated.                                                                                               |
| 3e_PT_2014 [40]    | 10 | #3 | 2 | 5 | Missed outcome of vote                                                                                                                                 |
| 3e_PT_2014 [40]    | 21 | #3 | 1 | 2 | Mentioned "What is the efficacy, cost efficacy and safety for urate-lowering therapy"                                                                  |
| 3e_PT_2014 [40]    | 6  | #4 | 3 | 1 | Not found                                                                                                                                              |
| 3e_PT_2014 [40]    | 7  | #4 | 6 | 3 | Without b) c) and d)                                                                                                                                   |
| 3e_PT_2014 [40]    | 9  | #4 | 6 | 2 | The description is unclear                                                                                                                             |
| 3e_PT_2014 [40]    | 10 | #4 | 6 | 3 | Without b) and c)                                                                                                                                      |
| 3e_PT_2014 [40]    | 17 | #4 | 7 | 4 | No summary                                                                                                                                             |
| 3e_PT_2014 [40]    | 22 | #4 | 3 | 1 | Not found                                                                                                                                              |
| ACP_2017 [19, 20]  | 1  | #1 | 5 | 6 | B) was provided as epidemiological information. Scoring criteria for this item were clarified.                                                         |
| ACP_2017 [19, 20]  | 2  | #1 | 5 | 7 | Key questions were provided in the Appendix. Scoring criteria for this item was clarified.                                                             |
| ACP_2017 [19, 20]  | 13 | #1 | 3 | 5 | Methods section & Peer review section - All comments were read and carefully                                                                           |

|                   |    |    |   |   |                                                                                                                                                                                                                                              |
|-------------------|----|----|---|---|----------------------------------------------------------------------------------------------------------------------------------------------------------------------------------------------------------------------------------------------|
|                   |    |    |   |   | considered by the authors                                                                                                                                                                                                                    |
| ACP_2017 [19, 20] | 18 | #1 | 1 | 2 | Diagnosis document, page 55. "...it often is difficult to perform in primary care and even rheumatologic settings"                                                                                                                           |
| ACP_2017 [19, 20] | 5  | #2 | 3 | 5 | The method is described in reference [10].<br>-2: The outcomes are not shown.                                                                                                                                                                |
| ACP_2017 [19, 20] | 7  | #2 | 5 | 7 | The details are in reference [8].                                                                                                                                                                                                            |
| ACP_2017 [19, 20] | 10 | #2 | 3 | 5 | The detailed methods are in reference [10].<br>-2: the outcomes are not provided.                                                                                                                                                            |
| ACP_2017 [19, 20] | 13 | #2 | 6 | 5 | Appendix peer review.<br>-1: outcomes are not described.<br>-1: no purpose provided.                                                                                                                                                         |
| ACP_2017 [19, 20] | 14 | #2 | 1 | 4 | The content of updating is in reference [10].<br>-2: the time interval is not stated.<br>-1: no statement about updating in the guideline itself, so the information is very hard to find.                                                   |
| ACP_2017 [19, 20] | 15 | #2 | 7 | 6 | -1: not all recommendations provide purpose (e.g. Recommendation 4)                                                                                                                                                                          |
| ACP_2017 [19, 20] | 18 | #2 | 5 | 4 | Summary of diagnosis , bout synovial fluid analysis.<br>-2: Method by which the information was sought is not described.<br>-1: They are not about the barriers or facilitators of the whole guideline.                                      |
| ACP_2017 [19, 20] | 19 | #2 | 5 | 3 | The summary figures.<br>-1: the summary figures include a clinical consideration part, but there's no specific implementation section in the guideline.<br>-3: No other information about implementation advice or tools for this guideline. |
| ACP_2017 [19, 20] | 22 | #3 | 1 | 4 | No statement that the funding body did not influence the content of the guideline                                                                                                                                                            |
| ACP_2017 [19, 20] | 1  | #4 | 7 | 6 | The outcome/benefit is not provided                                                                                                                                                                                                          |
| ACP_2017 [19, 20] | 5  | #4 | 1 | 5 | The patients' preference is provided in the appendix                                                                                                                                                                                         |
| ACP_2017 [19, 20] | 6  | #4 | 7 | 4 | B) is not provided                                                                                                                                                                                                                           |
| ACP_2017 [19, 20] | 9  | #4 | 5 | 6 | It provides the information but 1' for not easy to find                                                                                                                                                                                      |
| ACP_2017 [19, 20] | 11 | #4 | 4 | 6 | In the second part of the guideline                                                                                                                                                                                                          |
| ACP_2017 [19, 20] | 13 | #4 | 1 | 5 | The peer review in the appendix                                                                                                                                                                                                              |
| ACP_2017 [19, 20] | 15 | #4 | 7 | 5 | B) is not provided                                                                                                                                                                                                                           |
| ACP_2017 [19, 20] | 16 | #4 | 1 | 7 | In the second part of the guideline                                                                                                                                                                                                          |

1  
2  
3  
4  
5  
6  
7  
8  
9  
10  
11  
12  
13  
14  
15  
16  
17  
18  
19  
20  
21  
22  
23  
24  
25  
26  
27  
28  
29  
30  
31  
32  
33  
34  
35  
36  
37  
38  
39  
40  
41  
42  
43  
44  
45  
46  
47

|                     |    |    |   |   |                                                                                                                                                  |
|---------------------|----|----|---|---|--------------------------------------------------------------------------------------------------------------------------------------------------|
| ACP_2017 [19, 20]   | 20 | #4 | 1 | 5 | The management part covers cost                                                                                                                  |
| ACP_2017 [19, 20]   | 22 | #4 | 7 | 4 | Only a funding body but no statement                                                                                                             |
| ACR_2012 [14, 15]   | 1  | #1 | 7 | 6 | This content was not easy to find.                                                                                                               |
| ACR_2012 [14, 15]   | 2  | #1 | 7 | 5 | Clinical questions were presented (Guideline part 1, page 1434) but not listed in the guideline. Scoring criteria for this item were clarified.  |
| ACR_2012 [14, 15]   | 4  | #1 | 5 | 7 | The role of each member was provided on page 1444.                                                                                               |
| ACR_2012 [14, 15]   | 13 | #1 | 1 | 2 | This guideline was published in a peer-reviewed journal. Scoring criteria for this item were clarified.                                          |
| ACR_2012 [14, 15]   | 23 | #1 | 1 | 4 | Conflict of interest was mentioned on page 1434 of guideline part 1.                                                                             |
| ACR_2012 [14, 15]   | 1  | #2 | 7 | 6 | All included, but difficult to find.                                                                                                             |
| ACR_2012 [14, 15]   | 3  | #2 | 5 | 7 | The scoring criteria were clarified after discussion.                                                                                            |
| ACR_2012 [14, 15]   | 6  | #2 | 6 | 4 | Intended audience are discribed.P1433.<br>-3: no description of how to use.                                                                      |
| ACR_2012 [14, 15]   | 23 | #2 | 7 | 4 | -1: no method.<br>-2: no influence                                                                                                               |
| ACR_2012 [14, 15]   | 9  | #3 | 4 | 7 | All included                                                                                                                                     |
| ACR_2012 [14, 15]   | 22 | #3 | 2 | 3 | Mentioned "The name of the funding body or source of funding"                                                                                    |
| ACR_2012 [14, 15]   | 1  | #4 | 5 | 7 | Scoring criteria modified                                                                                                                        |
| ACR_2012 [14, 15]   | 3  | #4 | 2 | 5 | Scoring criteria modified                                                                                                                        |
| ACR_2012 [14, 15]   | 6  | #4 | 1 | 5 | Scoring criteria modified                                                                                                                        |
| ACR_2012 [14, 15]   | 9  | #4 | 4 | 7 | Scoring criteria modified                                                                                                                        |
| ACR_2012 [14, 15]   | 13 | #4 | 4 | 1 | Scoring criteria modified                                                                                                                        |
| ACR_2012 [14, 15]   | 17 | #4 | 7 | 4 | Scoring criteria modified                                                                                                                        |
| ACR_2012 [14, 15]   | 18 | #4 | 4 | 1 | Scoring criteria modified                                                                                                                        |
| ACR_2012 [14, 15]   | 21 | #4 | 7 | 1 | Scoring criteria modified                                                                                                                        |
| ACR_2012 [14, 15]   | 23 | #4 | 7 | 5 | Scoring criteria modified                                                                                                                        |
| ACR_EULAR_2015 [42] | 1  | #1 | 5 | 6 | Scoring criteria clarified. Epidemiological information was provided (1').                                                                       |
| ACR_EULAR_2015 [42] | 5  | #1 | 1 | 6 | A patient participated in phase 1 (page 1790)                                                                                                    |
| ACR_EULAR_2015 [42] | 9  | #1 | 1 | 7 | QUADAS tool was used (reference 20)                                                                                                              |
| ACR_EULAR_2015 [42] | 14 | #1 | 1 | 3 | Information on guideline update was provided as 'all ACR-EULAR approved criteria sets are expected to undergo intermittent updates' (page 1789). |
| ACR_EULAR_2015 [42] | 19 | #1 | 2 | 3 | A web-based calculator was provided (page 1794)                                                                                                  |
| ACR_EULAR_2015 [42] | 11 | #2 | 1 | 7 | As a diagnostic guideline, it did consider the specificity and sensitivity.                                                                      |

|                     |    |    |   |   |                                                                                                                                                                                                                                                                                        |
|---------------------|----|----|---|---|----------------------------------------------------------------------------------------------------------------------------------------------------------------------------------------------------------------------------------------------------------------------------------------|
| ACR_EULAR_2015 [42] | 12 | #2 | 3 | 5 | Evidences are described in reference 23, thought how a specific evidence is linked to a recommendation is not described in detail.                                                                                                                                                     |
| ACR_EULAR_2015 [42] | 18 | #3 | 1 | 3 | Mentioned the facilitator in page 1791                                                                                                                                                                                                                                                 |
| ACR_EULAR_2015 [42] | 4  | #4 | 4 | 5 | Correction of arithmetical errors                                                                                                                                                                                                                                                      |
| ACR_EULAR_2015 [42] | 5  | #4 | 1 | 6 | In phase 1 we can find it                                                                                                                                                                                                                                                              |
| ACR_EULAR_2015 [42] | 7  | #4 | 1 | 7 | All included                                                                                                                                                                                                                                                                           |
| ACR_EULAR_2015 [42] | 9  | #4 | 1 | 7 | QUADAS tool was used (reference 20)                                                                                                                                                                                                                                                    |
| ACR_EULAR_2015 [42] | 11 | #4 | 3 | 7 | The scoring criteria was specified/modified/clarified and the score was modified accordingly                                                                                                                                                                                           |
| ACR_EULAR_2015 [42] | 12 | #4 | 7 | 5 | Link Between Recommendations and Evidence                                                                                                                                                                                                                                              |
| ACR_EULAR_2015 [42] | 14 | #4 | 6 | 3 | Only a little, "All ACR-EULAR approved criteria sets are expected to undergo intermittent updates"                                                                                                                                                                                     |
| ACR_EULAR_2015 [42] | 18 | #4 | 1 | 4 | "We also realised that some investigators may not have access to imaging and therefore aimed to develop criteria that would still perform well in the absence of imaging data."                                                                                                        |
| ACR_EULAR_2015 [42] | 19 | #4 | 1 | 3 | The tool in page 1794                                                                                                                                                                                                                                                                  |
| BSR_2017 [21]       | 2  | #1 | 4 | 7 | Principal clinical questions were listed in table 1. Scoring criteria for this item were clarified.                                                                                                                                                                                    |
| BSR_2017 [21]       | 3  | #1 | 5 | 7 | Target population was defined in Objective, Gout in the UK.                                                                                                                                                                                                                            |
| BSR_2017 [21]       | 5  | #1 | 1 | 5 | Two lay patients involved in the guideline development group (Objective, Stakeholder involvement).                                                                                                                                                                                     |
| BSR_2017 [21]       | 12 | #1 | 7 | 6 | Evidence summary table was not provided.                                                                                                                                                                                                                                               |
| BSR_2017 [21]       | 14 | #1 | 1 | 2 | Update information was provided online: <a href="https://www.rheumatology.org.uk/Knowledge/Excellence/Guidelines/artmid/1256/articleid/18">https://www.rheumatology.org.uk/Knowledge/Excellence/Guidelines/artmid/1256/articleid/18</a> . This content was very difficult to be found. |
| BSR_2017 [21]       | 17 | #1 | 7 | 4 | B) was not provided.                                                                                                                                                                                                                                                                   |
| BSR_2017 [21]       | 1  | #2 | 6 | 7 | The scoring criteria were clarified after discussion.                                                                                                                                                                                                                                  |
| BSR_2017 [21]       | 3  | #2 | 5 | 7 | Gout in UK. The scoring criteria were clarified after discussion.                                                                                                                                                                                                                      |
| BSR_2017 [21]       | 4  | #2 | 4 | 6 | Clear and easy to find. An epidemiologist (W.Z.) was involved in the development group.<br>-1: No description of each member's role.                                                                                                                                                   |
| BSR_2017 [21]       | 5  | #2 | 6 | 5 | Miscalculated. -2: the outcomes/information gathered from patients were not provided.                                                                                                                                                                                                  |
| BSR_2017 [21]       | 14 | #2 | 1 | 2 | Didn't find the updating time, but it is provided.                                                                                                                                                                                                                                     |

1  
2  
3  
4  
5  
6  
7  
8  
9  
10  
11  
12  
13  
14  
15  
16  
17  
18  
19  
20  
21  
22  
23  
24  
25  
26  
27  
28  
29  
30  
31  
32  
33  
34  
35  
36  
37  
38  
39  
40  
41  
42  
43  
44  
45  
46  
47

|                |    |    |   |   |                                                                                                                                                                                   |
|----------------|----|----|---|---|-----------------------------------------------------------------------------------------------------------------------------------------------------------------------------------|
| BSR_2017 [21]  | 17 | #2 | 7 | 3 | Fig 1.<br>-3: recommendations are not grouped in the guideline.                                                                                                                   |
| BSR_2017 [21]  | 19 | #2 | 2 | 5 | Other information is provided.<br>-2: No direction on how to access the summary.                                                                                                  |
| BSR_2017 [21]  | 21 | #2 | 7 | 5 | The scoring criteria were clarified after discussion.<br>'-1: No link to the audit tool in the guideline.<br>-1: no advice on the frequency of measurement.                       |
| BSR_2017 [21]  | 18 | #3 | 1 | 4 | Identification of the types of facilitators and barriers that were considered;<br>Information/description of the types of facilitators and barriers that emerged from the inquiry |
| BSR_2017 [21]  | 1  | #4 | 5 | 7 | Scoring criteria modified                                                                                                                                                         |
| BSR_2017 [21]  | 3  | #4 | 5 | 7 | Scoring criteria modified                                                                                                                                                         |
| BSR_2017 [21]  | 5  | #4 | 4 | 6 | Scoring criteria modified                                                                                                                                                         |
| BSR_2017 [21]  | 8  | #4 | 4 | 5 | Scoring criteria modified                                                                                                                                                         |
| BSR_2017 [21]  | 12 | #4 | 2 | 7 | Scoring criteria modified                                                                                                                                                         |
| BSR_2017 [21]  | 13 | #4 | 1 | 5 | Scoring criteria modified                                                                                                                                                         |
| BSR_2017 [21]  | 14 | #4 | 4 | 3 | Correction of arithmetical errors                                                                                                                                                 |
| BSR_2017 [21]  | 19 | #4 | 1 | 5 | "An audit tool is available on the website of the British Society for Rheumatology."                                                                                              |
| BSR_2017 [21]  | 20 | #4 | 4 | 6 | Scoring criteria modified                                                                                                                                                         |
| CCCP_2012 [47] | 1  | #1 | 5 | 6 | B) was not clearly stated only provided as epidemiology.                                                                                                                          |
| CCCP_2012 [47] | 2  | #1 | 4 | 3 | Clinical questions can be inferred but not clearly stated. Scoring criteria for this item were clarified.                                                                         |
| CCCP_2012 [47] | 17 | #1 | 7 | 4 | Recommendations were not grouped together.                                                                                                                                        |
| CCCP_2012 [47] | 12 | #2 | 4 | 3 | Miscalculated.                                                                                                                                                                    |
| CCCP_2012 [47] | 2  | #3 | 6 | 3 | Clinical questions was not clearly stated.                                                                                                                                        |
| CCCP_2012 [47] | 17 | #3 | 6 | 4 | Recommendations were not grouped together in one section                                                                                                                          |
| CCCP_2012 [47] | 2  | #4 | 6 | 3 | Scoring criteria modified                                                                                                                                                         |
| CCCP_2012 [47] | 11 | #4 | 5 | 4 | Correction of arithmetical errors                                                                                                                                                 |
| CCCP_2012 [47] | 17 | #4 | 7 | 4 | No summary                                                                                                                                                                        |
| CRA_2016 [41]  | 1  | #1 | 4 | 5 | B) was provided as epidemiological information. Scoring criteria for this item were clarified.                                                                                    |
| CRA_2016 [41]  | 2  | #1 | 6 | 5 | Appendix 5. Clinical questions were selected but no detail was given. Scoring criteria for this item were clarified.                                                              |

|                     |    |    |   |   |                                                                                                                                                                                                                                                                           |
|---------------------|----|----|---|---|---------------------------------------------------------------------------------------------------------------------------------------------------------------------------------------------------------------------------------------------------------------------------|
| CRA_2016 [41]       | 6  | #1 | 7 | 4 | B) was not provided.                                                                                                                                                                                                                                                      |
| CRA_2016 [41]       | 8  | #1 | 1 | 3 | Study design given in Appendix 6.                                                                                                                                                                                                                                         |
| CRA_2016 [41]       | 10 | #1 | 7 | 3 | Although Delphi method was used, the outcome and the influence on guideline development was not given.                                                                                                                                                                    |
| CRA_2016 [41]       | 18 | #1 | 4 | 1 | Sensitivity and specificity were not barriers to application.                                                                                                                                                                                                             |
| CRA_2016 [41]       | 2  | #2 | 3 | 5 | Methods in the Appendix. The details of the questions are not provided. There was some misunderstanding of this item. The scoring criteria were clarified after discussion.                                                                                               |
| CRA_2016 [41]       | 8  | #2 | 1 | 3 | The inclusion criteria only include study design.                                                                                                                                                                                                                         |
| CRA_2016 [41]       | 13 | #2 | 5 | 3 | Methods in the Appendix. External experts are involved the question choosing process, but it is not a review.                                                                                                                                                             |
| CRA_2016 [41]       | 15 | #2 | 7 | 6 | Some purposes of recommendations are not clearly stated.                                                                                                                                                                                                                  |
| CRA_2016 [41]       | 23 | #2 | 1 | 4 | Appendix. I didn't find this information.                                                                                                                                                                                                                                 |
| CRA_2016 [41]       | 4  | #3 | 1 | 5 | Mentioned name and institution and performance                                                                                                                                                                                                                            |
| CRA_2016 [41]       | 8  | #3 | 1 | 3 | Mentioned study design                                                                                                                                                                                                                                                    |
| CRA_2016 [41]       | 16 | #3 | 3 | 6 | Some options are provided with the most appropriate population or clinical situation.                                                                                                                                                                                     |
| CRA_2016 [41]       | 17 | #4 | 1 | 4 | Important advice has a key tag                                                                                                                                                                                                                                            |
| CRA_multi_2017 [22] | 1  | #1 | 5 | 7 | B) was stated in the last sentence of paragraph 1.                                                                                                                                                                                                                        |
| CRA_multi_2017 [22] | 2  | #1 | 5 | 3 | Clinical questions considered could be indicated from the guideline but no clear statement was given.                                                                                                                                                                     |
| CRA_multi_2017 [22] | 12 | #1 | 5 | 3 | C) evidence table was also not provided.                                                                                                                                                                                                                                  |
| CRA_multi_2017 [22] | 15 | #1 | 4 | 5 | Page 237. The uncertainty between coffee and gout was stated.                                                                                                                                                                                                             |
| CRA_multi_2017 [22] | 17 | #1 | 4 | 2 | A) was not provided. The summary box in the document only contained pharmacological treatment, but not all recommendations of the guideline.                                                                                                                              |
| CRA_multi_2017 [22] | 2  | #2 | 1 | 3 | The questions that this guideline tries to solve are not mentioned, can only be inferred from the context. There was some misunderstanding of this item. The scoring criteria were clarified after discussion.                                                            |
| CRA_multi_2017 [22] | 15 | #2 | 7 | 5 | Most informative example: Page 237 "management of patients with gout".<br>-1: Some recommendations are without an intent or purpose (e.g. Page 237 Non-drug therapy).<br>-1: Some uncertainty exists, but not reflected in recommendations, and is not explicitly stated. |
| CRA_multi_2017 [22] | 17 | #2 | 7 | 3 | We discussed the criteria & I had some misunderstanding.<br>-1: Table 1&2 are only summary of a very little part not the summary of the                                                                                                                                   |

|                     |    |    |   |   |                                                                                                                                                                                                                 |
|---------------------|----|----|---|---|-----------------------------------------------------------------------------------------------------------------------------------------------------------------------------------------------------------------|
|                     |    |    |   |   | guideline.<br>-3: recommendations can not be easily distinguished form other content, and they are not grouped.                                                                                                 |
| CRA_multi_2017 [22] | 12 | #3 | 2 | 5 | Only some recommendations meet criteria, and no table                                                                                                                                                           |
| CRA_multi_2017 [22] | 11 | #4 | 2 | 5 | Page 241 item (2)                                                                                                                                                                                               |
| CRA_multi_2017 [22] | 15 | #4 | 6 | 5 | Some items don't give the purpose                                                                                                                                                                               |
| CRA_multi_2017 [22] | 17 | #4 | 7 | 4 | It doesn't have a summary that concludes all recommends                                                                                                                                                         |
| CSE_2013 [37]       | 3  | #1 | 7 | 6 | The target population indicated from the title (patients with hyperuricemia or gout) and from the guideline (patient with hyperuricemia) was conflicted.                                                        |
| CSE_2013 [37]       | 6  | #1 | 2 | 6 | This content could be indicated from the guideline but was not clearly stated.                                                                                                                                  |
| CSE_2013 [37]       | 12 | #1 | 1 | 5 | An evidence summary table was provided on page 915. A) was not provided.                                                                                                                                        |
| CSE_2013 [37]       | 16 | #1 | 7 | 6 | The appropriate population was not provided in some management options for probenecid (page 918).                                                                                                               |
| CSE_2013 [37]       | 18 | #1 | 1 | 3 | The availability of uricase (page 918) was discussed but no detail was given.                                                                                                                                   |
| CSE_2013 [37]       | 2  | #2 | 5 | 1 | The scoring criteria were clarified after discussion.<br>-6: No specifically described question is provided in the guideline.                                                                                   |
| CSE_2013 [37]       | 3  | #2 | 1 | 6 | The scoring criteria were clarified after discussion.                                                                                                                                                           |
| CSE_2013 [37]       | 6  | #2 | 1 | 6 | The target audience can be inferred as clinical practitioners from the word "in clinical settings", and the guideline may be used by "providing guidance".<br>-1: The target audience is not clearly described. |
| CSE_2013 [37]       | 9  | #2 | 1 | 3 | Table 1.<br>-3: The method to evaluate the strengths and limitations of evidence is not provided.<br>-1: The information is only reported for some of the evidences.                                            |
| CSE_2013 [37]       | 17 | #2 | 6 | 7 | The key points are at the beginning.<br>Two flow charts are provided.<br>Relevant recommendations are grouped together.                                                                                         |
| CSE_2013 [37]       | 18 | #2 | 2 | 3 | Miscalculated.                                                                                                                                                                                                  |
| CSE_2013 [37]       | 21 | #2 | 6 | 1 | The scoring criteria were clarified after discussion. I misunderstood this item.                                                                                                                                |
| CSE_2013 [37]       | 4  | #3 | 1 | 2 | Mentioned "The guideline development group"                                                                                                                                                                     |
| CSE_2013 [37]       | 15 | #3 | 7 | 6 | Subtract 1                                                                                                                                                                                                      |
| CSE_2013 [37]       | 19 | #3 | 4 | 1 | Not mentioned                                                                                                                                                                                                   |
| CSE_2013 [37]       | 1  | #4 | 2 | 7 | Scoring criteria modified                                                                                                                                                                                       |
| CSE_2013 [37]       | 2  | #4 | 5 | 2 | Scoring criteria modified                                                                                                                                                                                       |

|    |                 |    |    |   |   |                                                                                                                                                                                              |
|----|-----------------|----|----|---|---|----------------------------------------------------------------------------------------------------------------------------------------------------------------------------------------------|
| 1  |                 |    |    |   |   |                                                                                                                                                                                              |
| 2  |                 |    |    |   |   |                                                                                                                                                                                              |
| 3  |                 |    |    |   |   |                                                                                                                                                                                              |
| 4  |                 |    |    |   |   |                                                                                                                                                                                              |
| 5  | CSE_2013 [37]   | 3  | #4 | 3 | 6 | Scoring criteria modified                                                                                                                                                                    |
| 6  | CSE_2013 [37]   | 4  | #4 | 2 | 3 | Correction of arithmetical errors                                                                                                                                                            |
| 7  | CSE_2013 [37]   | 6  | #4 | 1 | 5 | Scoring criteria modified                                                                                                                                                                    |
| 8  | CSE_2013 [37]   | 11 | #4 | 2 | 5 | Scoring criteria modified                                                                                                                                                                    |
| 9  | CSE_2013 [37]   | 12 | #4 | 5 | 3 | Scoring criteria modified                                                                                                                                                                    |
| 10 | CSE_2013 [37]   | 21 | #4 | 7 | 1 | Scoring criteria modified                                                                                                                                                                    |
| 11 | EULAR_2006 [18] | 11 | #1 | 7 | 6 | Some of the recommendations did not consider the harms (e.g., Recommendation 4).                                                                                                             |
| 12 | EULAR_2006 [18] | 22 | #1 | 1 | 4 | "Thank the European League Against Rheumatism for financial support" (acknowledgement)                                                                                                       |
| 13 | EULAR_2006 [18] | 6  | #2 | 7 | 1 | This is not described.                                                                                                                                                                       |
| 14 | EULAR_2006 [18] | 4  | #3 | 3 | 5 | Missed description of the member's role in the guideline development group                                                                                                                   |
| 15 | EULAR_2006 [18] | 20 | #3 | 1 | 5 | Mentioned Incremental cost-effectiveness ratio                                                                                                                                               |
| 16 | EULAR_2006 [18] | 1  | #4 | 7 | 6 | l' for performance                                                                                                                                                                           |
| 17 | EULAR_2006 [18] | 4  | #4 | 7 | 5 | Can be found in the methods and the appendix, but is unclear                                                                                                                                 |
| 18 | EULAR_2006 [18] | 6  | #4 | 3 | 2 | Only can be analysed from the article                                                                                                                                                        |
| 19 | EULAR_2006 [18] | 10 | #4 | 7 | 4 | No details                                                                                                                                                                                   |
| 20 | EULAR_2006 [18] | 18 | #4 | 5 | 1 | This score is exchanged to item 20                                                                                                                                                           |
| 21 | EULAR_2006 [18] | 20 | #4 | 1 | 5 | The score is exchanged to item 18                                                                                                                                                            |
| 22 | EULAR_2011 [17] | 6  | #2 | 2 | 3 | How to use can also be inferred.                                                                                                                                                             |
| 23 | EULAR_2011 [17] | 7  | #3 | 2 | 4 | Missed cd, target research was conducted through Pubmed, from Feb 2005 through Feb 2011                                                                                                      |
| 24 | EULAR_2011 [17] | 8  | #4 | 7 | 4 | No c) or d)                                                                                                                                                                                  |
| 25 | EULAR_2011 [17] | 11 | #4 | 5 | 7 | Well described                                                                                                                                                                               |
| 26 | EULAR_2011 [17] | 19 | #4 | 5 | 2 | Only table6                                                                                                                                                                                  |
| 27 | EULAR_2011 [17] | 23 | #4 | 7 | 4 | "Besides ensuring their availability during the development of the project and its CV, all the panellists were asked to submit a declaration of conflicts of interest."                      |
| 28 | EULAR_2016 [16] | 5  | #1 | 6 | 5 | Outcome weighs 2'                                                                                                                                                                            |
| 29 | EULAR_2016 [16] | 8  | #1 | 6 | 2 | Only general criteria on study design was provided. Inclusion criteria were not provided.                                                                                                    |
| 30 | EULAR_2016 [16] | 13 | #1 | 2 | 6 | Page 28, second paragraph to the right. The influence of external review on guideline development was not clearly stated. The outcome of external review was provided in supplementary data. |
| 31 |                 |    |    |   |   |                                                                                                                                                                                              |
| 32 |                 |    |    |   |   |                                                                                                                                                                                              |
| 33 |                 |    |    |   |   |                                                                                                                                                                                              |
| 34 |                 |    |    |   |   |                                                                                                                                                                                              |
| 35 |                 |    |    |   |   |                                                                                                                                                                                              |
| 36 |                 |    |    |   |   |                                                                                                                                                                                              |
| 37 |                 |    |    |   |   |                                                                                                                                                                                              |
| 38 |                 |    |    |   |   |                                                                                                                                                                                              |
| 39 |                 |    |    |   |   |                                                                                                                                                                                              |
| 40 |                 |    |    |   |   |                                                                                                                                                                                              |
| 41 |                 |    |    |   |   |                                                                                                                                                                                              |
| 42 |                 |    |    |   |   |                                                                                                                                                                                              |
| 43 |                 |    |    |   |   |                                                                                                                                                                                              |
| 44 |                 |    |    |   |   |                                                                                                                                                                                              |
| 45 |                 |    |    |   |   |                                                                                                                                                                                              |
| 46 |                 |    |    |   |   |                                                                                                                                                                                              |
| 47 |                 |    |    |   |   |                                                                                                                                                                                              |



|                  |    |    |   |   |                                                                                                                                                           |
|------------------|----|----|---|---|-----------------------------------------------------------------------------------------------------------------------------------------------------------|
| EULAR_2016 [16]  | 4  | #2 | 7 | 6 | -1: role of each member is not clearly stated.                                                                                                            |
| EULAR_2016 [16]  | 5  | #2 | 6 | 5 | Miscalculated the score.<br>-2: the outcome is not provided.                                                                                              |
| EULAR_2016 [16]  | 6  | #3 | 7 | 5 | No strategy                                                                                                                                               |
| EULAR_2016 [16]  | 5  | #4 | 4 | 5 | Correction of arithmetical errors                                                                                                                         |
| EULAR_2016 [16]  | 7  | #4 | 7 | 5 | The full strategy is not provided                                                                                                                         |
| EULAR_2016 [16]  | 8  | #4 | 7 | 3 | It gives some criteria but is unclear                                                                                                                     |
| EULAR_2016 [16]  | 13 | #4 | 3 | 6 | It described the external review clearly                                                                                                                  |
| EULAR_2016 [16]  | 14 | #4 | 4 | 2 | It is updated, but no a) b) or c)                                                                                                                         |
| EULAR_2016 [16]  | 18 | #4 | 1 | 2 | It only gives two information about barrier                                                                                                               |
| FMOH_2014 [44]   | 2  | #1 | 6 | 3 | The clinical topic could be inferred but not clearly stated.                                                                                              |
| FMOH_2014 [44]   | 11 | #1 | 1 | 2 | Benefits were considered but not harms.                                                                                                                   |
| FMOH_2014 [44]   | 15 | #1 | 5 | 3 | Mis-calculation of the score. Uncertainty and purpose were not provided.                                                                                  |
| FMOH_2014 [44]   | 17 | #1 | 7 | 4 | A) was not provided. The summarized box only contained a sample menu not the recommendations.                                                             |
| FMOH_2014 [44]   | 20 | #2 | 1 | 3 | Price is considered in policy part.                                                                                                                       |
| FMOH_2014 [44]   | 4  | #3 | 2 | 5 | Mentioned a, name ,expertise, institution and performance                                                                                                 |
| FMOH_2014 [44]   | 22 | #3 | 4 | 1 | Not mentioned                                                                                                                                             |
| FMOH_2014 [44]   | 2  | #4 | 5 | 3 | Scoring criteria modified                                                                                                                                 |
| FMOH_2014 [44]   | 4  | #4 | 3 | 5 | Can be found in Acknowledgements                                                                                                                          |
| FMOH_2014 [44]   | 11 | #4 | 4 | 3 | Benefits were considered but not harms                                                                                                                    |
| FMOH_2014 [44]   | 15 | #4 | 6 | 3 | The uncertainty is not provided                                                                                                                           |
| FMOH_2014 [44]   | 18 | #4 | 4 | 1 | Not found                                                                                                                                                 |
| FMOH_2014 [44]   | 20 | #4 | 1 | 3 | It mentions price                                                                                                                                         |
| JSGNAM_2011 [48] | 9  | #1 | 5 | 6 | The consistency of original studies included in meta analysis was also considered.                                                                        |
| JSGNAM_2011 [48] | 6  | #2 | 1 | 4 | How to use is involved. "guideline is appropriately used for the standard management and care of patients with hyperuricemia and gout in daily practice". |
| JSGNAM_2011 [48] | 5  | #3 | 1 | 4 | The guideline revising committee collected clinical questions for the management of gout and hyperuricemia, and based on 41 clinical questions.           |
| JSGNAM_2011 [48] | 13 | #3 | 1 | 2 | A draft version of this guideline was reviewed by internal and external reviewers as well as a patient.                                                   |
| JSGNAM_2011 [48] | 16 | #3 | 7 | 6 | Subtract 1                                                                                                                                                |

|                       |    |    |   |   |                                                                                                                                                                                                  |
|-----------------------|----|----|---|---|--------------------------------------------------------------------------------------------------------------------------------------------------------------------------------------------------|
| JSGNAM_2011 [48]      | 7  | #4 | 3 | 2 | Unclear, only mentions searching but no details                                                                                                                                                  |
| JSGNAM_2011 [48]      | 12 | #4 | 6 | 4 | Some recommends are linked with the evidence                                                                                                                                                     |
| JSGNAM_2011 [48]      | 13 | #4 | 6 | 3 | The description is unclear                                                                                                                                                                       |
| JSGNAM_2011 [48]      | 17 | #4 | 6 | 5 | No b)                                                                                                                                                                                            |
| JSGNAM_2011 [48]      | 19 | #4 | 3 | 1 | Not found                                                                                                                                                                                        |
| MOH_MSR_AMM_2008 [49] | 12 | #1 | 3 | 5 | A) was presented as the grades of recommendations                                                                                                                                                |
| MOH_MSR_AMM_2008 [49] | 18 | #1 | 1 | 2 | The availability of diagnostic service was discussed (page 7, subheading 4.2)                                                                                                                    |
| MOH_MSR_AMM_2008 [49] | 19 | #1 | 1 | 3 | A summary and algorithm were provided (page VIII - XI).                                                                                                                                          |
| MOH_MSR_AMM_2008 [49] | 5  | #2 | 4 | 3 | The draft was on the website for comments and feedbacks from the public.<br>-1: this is not a clear statement that the target population is exactly involved. -2: no outcomes. -1: no influence. |
| MOH_MSR_AMM_2008 [49] | 6  | #2 | 4 | 7 | All information is described.                                                                                                                                                                    |
| MOH_MSR_AMM_2008 [49] | 10 | #2 | 3 | 2 | Miscalculated.                                                                                                                                                                                   |
| MOH_MSR_AMM_2008 [49] | 18 | #2 | 4 | 3 | Barrier: page 7, 4.2. But it is only a simple description, no any other information is provided.                                                                                                 |
| MOH_MSR_AMM_2008 [49] | 7  | #3 | 2 | 4 | Named electronic database and search terms                                                                                                                                                       |
| MOH_MSR_AMM_2008 [49] | 22 | #3 | 1 | 4 | The name of the funding body or source of funding                                                                                                                                                |
| MOH_MSR_AMM_2008 [49] | 4  | #4 | 7 | 5 | No roles                                                                                                                                                                                         |
| MOH_MSR_AMM_2008 [49] | 9  | #4 | 7 | 6 | The level of evidence only be graded by the type of article                                                                                                                                      |
| MOH_MSR_AMM_2008 [49] | 12 | #4 | 6 | 5 | Correction of arithmetical errors                                                                                                                                                                |
| MOH_MSR_AMM_2008 [49] | 13 | #4 | 7 | 3 | No details                                                                                                                                                                                       |
| MOH_MSR_AMM_2008 [49] | 14 | #4 | 1 | 5 | In the 3rd paragraph                                                                                                                                                                             |
| MOH_MSR_AMM_2008 [49] | 18 | #4 | 1 | 2 | The last sentence in the first paragraph of 4.2                                                                                                                                                  |

|                       |    |    |   |   |                                                                                                                                                                               |
|-----------------------|----|----|---|---|-------------------------------------------------------------------------------------------------------------------------------------------------------------------------------|
| MOH_MSR_AMM_2008 [49] | 22 | #4 | 7 | 4 | Unrestricted educational grant                                                                                                                                                |
| MOH_MSR_AMM_2008 [49] | 23 | #4 | 7 | 2 | Disclosure statement                                                                                                                                                          |
| PRA_2008 [50]         | 3  | #1 | 7 | 5 | Title and recommendations were targeting patients with gout, while Objectives in the Abstract narrowed to patients with gouty arthritis.                                      |
| PRA_2008 [50]         | 18 | #1 | 1 | 2 | Availability of allopurinol was discussed (page 9, first sentence)                                                                                                            |
| PRA_2008 [50]         | 7  | #3 | 7 | 5 | Full search strategy was not clear                                                                                                                                            |
| PRA_2008 [50]         | 3  | #4 | 7 | 5 | Title and recommendations have conflicting descriptions                                                                                                                       |
| PRA_2008 [50]         | 5  | #4 | 1 | 5 | Panel                                                                                                                                                                         |
| PRA_2008 [50]         | 6  | #4 | 1 | 7 | Well described                                                                                                                                                                |
| PRA_2008 [50]         | 7  | #4 | 7 | 5 | In the rational                                                                                                                                                               |
| PRA_2008 [50]         | 8  | #4 | 7 | 5 | It has but no details                                                                                                                                                         |
| PRA_2008 [50]         | 9  | #4 | 4 | 7 | Well described                                                                                                                                                                |
| PRA_2008 [50]         | 10 | #4 | 6 | 5 | In the method part                                                                                                                                                            |
| PRA_2008 [50]         | 12 | #4 | 6 | 5 | No summary                                                                                                                                                                    |
| PRA_2008 [50]         | 14 | #4 | 3 | 5 | Updates in management issues will be integrated as deemed necessary in the next 3 or more years                                                                               |
| PRA_2008 [50]         | 15 | #4 | 7 | 5 | No purpose                                                                                                                                                                    |
| PRA_2008 [50]         | 17 | #4 | 1 | 4 | Table 1                                                                                                                                                                       |
| PRA_2008 [50]         | 18 | #4 | 1 | 2 | "is the only drug available in this class in the Philippines"                                                                                                                 |
| PRA_2008 [50]         | 23 | #4 | 1 | 2 | "JLY serves as consultant to Novartis and trial investigator for Pfizer. EOS and JYL serve as trial investigators for Pfizer. Other members of TRC have nothing to disclose." |
| SAMA_2003 [51]        | 10 | #1 | 1 | 5 | Annexure a: methodology                                                                                                                                                       |
| SAMA_2003 [51]        | 22 | #1 | 4 | 7 | Annexure a: methodology                                                                                                                                                       |
| SAMA_2003 [51]        | 2  | #2 | 1 | 3 | The questions can be inferred.                                                                                                                                                |
| SAMA_2003 [51]        | 15 | #2 | 6 | 5 | No purpose. No uncertainty.                                                                                                                                                   |
| SAMA_2003 [51]        | 2  | #3 | 6 | 3 | Not provided in questions                                                                                                                                                     |
| SAMA_2003 [51]        | 2  | #4 | 5 | 3 | Scoring criteria modified                                                                                                                                                     |
| SAMA_2003 [51]        | 5  | #4 | 5 | 2 | The description is unclear                                                                                                                                                    |
| SER_2013 [46]         | 2  | #1 | 3 | 6 | Table 1. A question list was provided but it did not cover all the guideline aspects.                                                                                         |

|               |    |    |   |   |                                                                                                                                                                                                                                                                                                                    |
|---------------|----|----|---|---|--------------------------------------------------------------------------------------------------------------------------------------------------------------------------------------------------------------------------------------------------------------------------------------------------------------------|
| SER_2013 [46] | 6  | #1 | 7 | 4 | Although a) was provided under Chapter III, b) was not clearly given.                                                                                                                                                                                                                                              |
| SER_2013 [46] | 7  | #1 | 1 | 3 | The names of databases were provided (page 17).                                                                                                                                                                                                                                                                    |
| SER_2013 [46] | 2  | #2 | 7 | 6 | Questions are listed but the questions didn't cover the content of the guideline.                                                                                                                                                                                                                                  |
| SER_2013 [46] | 13 | #2 | 1 | 2 | Page 21 "The CPG was assessed by two external reviewers, a rheumatologist expert in this clinical area (FPR) and a methodologist who was expert at conducting clinical practice guidelines (MJGY)".                                                                                                                |
| SER_2013 [46] | 20 | #2 | 4 | 3 | With some recommendations mentioning the cost-effective aspect of a drug/test ( page 39), they said that they don't consider costs in the recommendations (Page 17 II.C "it was explicitly requested that they be written based on the risk/benefit balance for the patient, regardless of the associated costs"). |
| SER_2013 [46] | 6  | #3 | 7 | 5 | How the guideline may be used by its target audience was not mentioned                                                                                                                                                                                                                                             |
| SER_2013 [46] | 10 | #3 | 1 | 3 | Used the Delphi method                                                                                                                                                                                                                                                                                             |
| SER_2013 [46] | 13 | #3 | 1 | 2 | The CPG was assessed by two external reviewers                                                                                                                                                                                                                                                                     |
| SER_2013 [46] | 2  | #4 | 7 | 6 | The questions don't include every aspect                                                                                                                                                                                                                                                                           |
| SER_2013 [46] | 7  | #4 | 7 | 4 | Only the names of databases are provided (page 17                                                                                                                                                                                                                                                                  |
| SER_2013 [46] | 8  | #4 | 5 | 1 | Not found                                                                                                                                                                                                                                                                                                          |
| SER_2013 [46] | 12 | #4 | 7 | 4 | No c)                                                                                                                                                                                                                                                                                                              |
| SER_2013 [46] | 13 | #4 | 5 | 2 | Only one word                                                                                                                                                                                                                                                                                                      |
| SER_2013 [46] | 15 | #4 | 7 | 5 | No purpose                                                                                                                                                                                                                                                                                                         |
| SER_2013 [46] | 17 | #4 | 7 | 4 | No summary                                                                                                                                                                                                                                                                                                         |
| SER_2013 [46] | 18 | #4 | 7 | 4 | It mentions barriers but no more descriptions                                                                                                                                                                                                                                                                      |
| SER_2013 [46] | 23 | #4 | 7 | 2 | It mentions competing interests but no more descriptions                                                                                                                                                                                                                                                           |
| SIR_2013 [45] | 18 | #1 | 1 | 2 | Availability of treatments in Italy were stated (page 10).                                                                                                                                                                                                                                                         |
| SIR_2013 [45] | 20 | #1 | 2 | 4 | Cost effectiveness was also taken into consideration in the voting (page 6)                                                                                                                                                                                                                                        |
| SIR_2013 [45] | 18 | #2 | 5 | 4 | The guideline emphasizes that it was designed to adapt to Italian, considering current therapeutic options available in Italian.-1: no description. Table 2 & the explanation below the table, Page 12.-2: Methods are not provided.                                                                               |
| SIR_2013 [45] | 7  | #3 | 1 | 4 | The literature search was conducted in November 2011 in the following databases: MEDLINE, Embase, and Cochrane Central.                                                                                                                                                                                            |
| SIR_2013 [45] | 6  | #4 | 1 | 6 | I' for performance, "This document is intended for rheumatologists, general practitioners, internists, geriatricians, nephrologists, cardiologists and all healthcare professionals involved in the management of patients with gout."                                                                             |
| SIR_2013 [45] | 7  | #4 | 7 | 4 | No c) or d)                                                                                                                                                                                                                                                                                                        |
| SIR_2013 [45] | 8  | #4 | 5 | 6 | Correction of arithmetical errors                                                                                                                                                                                                                                                                                  |

|                    |    |    |   |   |                                                                                                                                                                                                                |
|--------------------|----|----|---|---|----------------------------------------------------------------------------------------------------------------------------------------------------------------------------------------------------------------|
| SIR_2013 [45]      | 17 | #4 | 7 | 4 | Scoring criteria modified                                                                                                                                                                                      |
| SIR_2013 [45]      | 18 | #4 | 1 | 3 | Availability of treatments in Italy were stated (page 10).                                                                                                                                                     |
| T2T_2016 [39]      | 5  | #2 | 6 | 5 | Miscalculated the score.<br>-2: the outcome is not provided.                                                                                                                                                   |
| T2T_2016 [39]      | 15 | #2 | 7 | 6 | Some purposes of recommendations are not clearly stated.                                                                                                                                                       |
| T2T_2016 [39]      | 6  | #3 | 1 | 2 | Only mentioned "To improve the management of"                                                                                                                                                                  |
| T2T_2016 [39]      | 4  | #4 | 6 | 5 | The name of group is unknown                                                                                                                                                                                   |
| T2T_2016 [39]      | 5  | #4 | 1 | 5 | A patient with gout gives the preference                                                                                                                                                                       |
| T2T_2016 [39]      | 6  | #4 | 4 | 1 | Not found                                                                                                                                                                                                      |
| T2T_2016 [39]      | 7  | #4 | 6 | 7 | The appendix gives all                                                                                                                                                                                         |
| T2T_2016 [39]      | 22 | #4 | 6 | 3 | No statement                                                                                                                                                                                                   |
| TRA_2016 [38]      | 1  | #1 | 4 | 5 | Scoring criteria for this item were clarified. B) was not provided but epidemiology information was given.                                                                                                     |
| TRA_2016 [38]      | 2  | #1 | 5 | 3 | The clinical topic can only be inferred but a question list was not provided. Scoring criteria for this item were clarified.                                                                                   |
| TRA_2016 [38]      | 20 | #1 | 1 | 2 | Appendix, part III                                                                                                                                                                                             |
| TRA_2016 [38]      | 2  | #2 | 1 | 3 | The questions that this guideline tries to solve are not mentioned, can only be inferred from the context. There was some misunderstanding of this item. The scoring criteria were clarified after discussion. |
| TRA_2016 [38]      | 15 | #2 | 7 | 6 | Not all recommendations provide purpose (e.g. Page 23 prevention of gout).                                                                                                                                     |
| TRA_2016 [38]      | 19 | #2 | 4 | 3 | The abstract is a good summary.<br>-1: but the abstract is not designed as an implementation tool.<br>-3: No any other information about implementation.                                                       |
| TRA_2016 [38]      | 11 | #3 | 7 | 5 | Subtract 1                                                                                                                                                                                                     |
| TRA_2016 [38]      | 20 | #3 | 1 | 2 | Mentioned in page27                                                                                                                                                                                            |
| TRA_2016 [38]      | 1  | #4 | 7 | 6 | 1' for the performance                                                                                                                                                                                         |
| TRA_2016 [38]      | 4  | #4 | 4 | 5 | Correction of arithmetical errors                                                                                                                                                                              |
| TRA_2016 [38]      | 12 | #4 | 1 | 2 | It provides little link between the recommends and evidence.                                                                                                                                                   |
| TRA_2016 [38]      | 19 | #4 | 4 | 1 | Not found                                                                                                                                                                                                      |
| TRA_2016 [38]      | 20 | #4 | 1 | 2 | Mentions health insurance rule                                                                                                                                                                                 |
| UTAustin_2009 [52] | 1  | #1 | 5 | 7 | Potential benefit                                                                                                                                                                                              |
| UTAustin_2009 [52] | 9  | #1 | 4 | 7 | A 3-point rating scheme was described in the Section - Methodology.                                                                                                                                            |
| UTAustin_2009 [52] | 2  | #2 | 4 | 3 | "Interventions and Practices Considered" are not questions.                                                                                                                                                    |

|                    |    |    |   |   |                                                                                                                                                                                     |
|--------------------|----|----|---|---|-------------------------------------------------------------------------------------------------------------------------------------------------------------------------------------|
| UTAustin_2009 [52] | 7  | #2 | 3 | 4 | Names of databases and key words are provided.                                                                                                                                      |
| UTAustin_2009 [52] | 8  | #2 | n | 1 | The information is not provided.                                                                                                                                                    |
| UTAustin_2009 [52] | 11 | #2 | 6 | 4 | '-1 : not all recommendations reflect the consideration of benefits and harms. (e.g. "discontinue drugs associated with gout when possible"). -2: supporting data are not provided. |
| UTAustin_2009 [52] | 12 | #2 | 2 | 5 | Evidence summaries or tables are not provided.                                                                                                                                      |
| UTAustin_2009 [52] | 15 | #2 | 6 | 5 | No purpose. No uncertainty.                                                                                                                                                         |
| UTAustin_2009 [52] | 18 | #2 | 4 | 2 | "Benefits/Harms of Implementing the Guideline Recommendations" exists. But it's not all about facilitators and barriers of application of the guideline.                            |
| UTAustin_2009 [52] | 19 | #2 | 6 | 3 | "Benefits/Harms of Implementing the Guideline Recommendations" exists. But it's not all about implementation advice or tools.                                                       |
| UTAustin_2009 [52] | 12 | #3 | 2 | 5 | No describes how the guideline development group linked and used the evidence to inform recommendations                                                                             |
| UTAustin_2009 [52] | 16 | #3 | 7 | 6 | Subtract 1                                                                                                                                                                          |
| UTAustin_2009 [52] | 2  | #4 | 5 | 3 | Scoring criteria modified                                                                                                                                                           |
| UTAustin_2009 [52] | 7  | #4 | 7 | 5 | No details                                                                                                                                                                          |
| UTAustin_2009 [52] | 8  | #4 | 5 | 1 | Not found                                                                                                                                                                           |
| UTAustin_2009 [52] | 13 | #4 | 7 | 2 | Only one word, no details                                                                                                                                                           |
| UTAustin_2009 [52] | 15 | #4 | 7 | 5 | Not that clear                                                                                                                                                                      |
| UTAustin_2009 [52] | 16 | #4 | 7 | 5 | Not that clear                                                                                                                                                                      |
| UTAustin_2009 [52] | 19 | #4 | n | 1 | Not found                                                                                                                                                                           |

**Supplementary Table 9. Summary of recommendations for the diagnosis of gout and hyperuricemia by included guidance document**

IE: insufficient evidence; MSU: monosodium urate; NA: not applicable; NG: not given; SUA: serum uric acid.

|                                                                          | SAMA_2003 [51] | EULAR_2006 [18] | MOH_MSR_AMM_2008 [49] | PRA_2008 [50] | EULAR_2011 [17] | JSGNAM_2011 [48] | CCCP_2012 [47] | 3e_2013 [36] | CSE_2013 [37] | SER_2013 [46] | SIR_2013 [45] | 3e_PT_2014 [40] | 3e_AU_NZ_2015 [43] | ACR_EULAR_2015 [42] | CRA_2016 [41] | TRA_2016 [38] | ACP_2017 [19, 20] | CRA_multi_2017 [22] |
|--------------------------------------------------------------------------|----------------|-----------------|-----------------------|---------------|-----------------|------------------|----------------|--------------|---------------|---------------|---------------|-----------------|--------------------|---------------------|---------------|---------------|-------------------|---------------------|
| <b>Diagnosis of gout</b>                                                 | +              | +               | +                     | NG            | +               | NG               | NG             | +            | NG            | +             | NG            | +               | +                  | +                   | +             | +             | +                 | +                   |
| _Clinical manifestations                                                 | +              | +               | +                     | NA            | +               | NA               | NA             | +            | NA            | +             | NA            | +               | +                  | +                   | +             | +             | +                 | +                   |
| _Laboratory results                                                      | +              | +               | -                     | NA            | +               | NA               | NA             | +            | NA            | +             | NA            | +               | +                  | +                   | +             | +             | +                 | +                   |
| _Imaging results                                                         | -              | +               | -                     | NA            | -               | NA               | NA             | +            | NA            | +             | NA            | +               | +                  | +                   | +             | +             | IE                | +                   |
| _MSU crystal as definitive diagnosis                                     | +              | +               | +                     | NA            | +               | NA               | NA             | +            | NA            | +             | NA            | +               | +                  | +                   | +             | +             | +                 | +                   |
| Monitor urate deposits clearance by imaging                              | -              | -               | -                     | -             | -               | -                | -              | -            | -             | IE            | -             | -               | -                  | +                   | -             | -             | -                 | +                   |
| Is the timing to assess urate deposits with imaging techniques provided? | -              | -               | -                     | -             | -               | -                | -              | -            | -             | -             | -             | -               | -                  | -                   | -             | -             | -                 | -                   |
| SUA for hyperuricemia, $\mu\text{mol/L}$ [mg/dL]                         | +              | NG              | +                     | +             | +               | +                | +              | NG           | +             | +             | +             | NG              | NG                 | NG                  | NG            | +             | NG                | +                   |
| _All gender                                                              | 420            | NG              | NG                    | NG            | [6.8]           | [7.0]            | 420 [7.0]      | NG           | NG            | NG            | 404 [6.8]     | NG              | NG                 | NG                  | NG            | [7.0]         | NG                | NG                  |
| _Female                                                                  | NG             | NG              | 360 [6.0]             | 357 [6.0]     | NG              | NG               | NG             | NG           | 360           | [6.0]         | NG            | NG              | NG                 | NG                  | NG            | NG            | NG                | 360                 |
| _Male                                                                    | NG             | NG              | 420 [7.0]             | 416 [7.0]     | NG              | NG               | NG             | NG           | 420           | [7.0]         | NG            | NG              | NG                 | NG                  | NG            | NG            | NG                | 420                 |
| <b>Diagnosis of asymptomatic hyperuricemia</b>                           | NG             | NG              | +                     | +             | NG              | +                | +              | +            | NG            | +             | NG            | NG              | NG                 | NG                  | NG            | +             | NG                | NG                  |
| _Gout flare                                                              | NA             | NA              | -                     | +             | NA              | +                | +              | +            | NA            | +             | NA            | NA              | NA                 | NA                  | NA            | +             | NA                | NA                  |
| _Tophi                                                                   | NA             | NA              | -                     | -             | NA              | +                | -              | +            | NA            | -             | NA            | NA              | NA                 | NA                  | NA            | -             | NA                | NA                  |
| _Additional medical conditions†                                          | NA             | NA              | +                     | +             | NA              | +                | +              | -            | NA            | -             | NA            | NA              | NA                 | NA                  | NA            | +             | NA                | NA                  |

\*Imaging results are considered for chronic gout, but not for early/acute gout.

†Additional medical conditions considered in the definition of asymptomatic hyperuricemia included complications of gout [47], renal disorder [48], signs or symptoms of

1  
2  
3  
4  
5 urate deposition [49], and uric acid nephrolithiasis [50]. One document provided a general statement of any clinical presentations [38]. One document explicitly stated that  
6 the inclusion of patients with pre-existing renal or cardiovascular disease was allowed [36].  
7  
8  
9  
10  
11  
12  
13  
14  
15  
16  
17  
18  
19  
20  
21  
22  
23  
24  
25  
26  
27  
28  
29  
30  
31  
32  
33  
34  
35  
36  
37  
38  
39  
40  
41  
42  
43  
44  
45  
46  
47

For peer review only



**Supplementary Table 10. Summary of recommendations for the treatment of hyperuricemia by included guidance documents**

A: allopurinol; Aft: (to initiate ULT) after an acute attack; B: benzbromarone; CCR: creatinine clearance rate; Cr: serum creatinine; CKD: chronic kidney disease; D: (to initiate ULT) during an acute attack; eGFR: estimated glomerular filtration rate; F: febuxostat; IE: insufficient evidence; m: month(s); NA: not applicable; NG: not given; P: probenecid; RF: renal function; SUA: serum uric acid; U: uricosurics without specification; ULT: urate lowering therapy; w: week(s); y: year.

|                                                                       | SAMA_2003 [51] | MOH_MSR_AMM_2008 [49] | PRA_2008 [50] | UTAustin_2009 [52] | EULAR_2011 [17] | JSGNAM_2011 [48] | ACR_2012 [14, 15] | CCCP_2012 [47] | 3e_2013 [36] | CSE_2013 [37] | SER_2013 [46] | SIR_2013 [45] | 3e_PT_2014 [40] | FMOH_2014 [44] | 3e_AU_NZ_2015 [43] | CRA_2016 [41] | EULAR_2016 [16] | T2T_2016 [39] | TRA_2016 [38] | ACP_2017 [19, 20] | BSR_2017 [21] | CRA_multi_2017 [22] |  |
|-----------------------------------------------------------------------|----------------|-----------------------|---------------|--------------------|-----------------|------------------|-------------------|----------------|--------------|---------------|---------------|---------------|-----------------|----------------|--------------------|---------------|-----------------|---------------|---------------|-------------------|---------------|---------------------|--|
| Upper limit for target SUA, $\mu\text{mol/L}$ [mg/dL]                 |                |                       |               |                    |                 |                  |                   |                |              |               |               |               |                 |                |                    |               |                 |               |               |                   |               |                     |  |
| _General target*                                                      | 300            | 360 [6.0]             | [6.0]         | NG                 | [6.0]           | [6.0]            | [6.0]             | 357 [6.0]      | 360 [6.0]    | 360           | [6.0]         | 360 [6.0]     | 360 [6.0]       | NG             | 360                | 360 [6.0]     | 360 [6.0]       | 360 [6.0]     | 360 [6.0]     | NG                | 360           | 360 [6.0]           |  |
| _Target for serve cases†                                              | NG             | NG                    | NG            | NG                 | [4.0]           | NG               | [5.0]             | NG             | 300          | 300           | NG            | NG            | 300 [5.0]       | NG             | 300                | NG            | 300 [5.0]       | 300 [5.0]     | 300 [5.0]     | NG                | 300           | 300 [5.0]           |  |
| Lower limit for target SUA, $\mu\text{mol/L}$ [mg/dL]                 | NG             | NG                    | NG            | NG                 | NG              | NG               | NG                | NG             | NG           | NG            | NG            | NG            | NG              | NG             | NG                 | NG            | [3.0]           | NG            | NG            | NG                | NG            | 180                 |  |
| Drinking water                                                        | -              | +                     | +             | -                  | -               | +                | -                 | +              | -            | +             | +             | -             | -               | +              | -                  | +             | -               | -             | +             | -                 | +             | +                   |  |
| Urine alkalinisation                                                  | +              | +                     | -             | -                  | +               | -                | +                 | +              | -            | +             | +             | -             | +               | +              | -                  | +             | -               | -             | +             | -                 | +             | +                   |  |
| Indications for ULT                                                   | +              | +                     | +             | -                  | +               | +                | +                 | +              | -            | +             | +             | +             | -               | NG             | -                  | +             | +               | -             | +             | +                 | +             | +                   |  |
| _Recurrent attacks                                                    | +, >2          | +, >3/y               | +             | NA                 | +, >1/y         | +                | +, $\geq 2/y$     | -              | NA           | -             | -             | +             | NA              | NG             | -                  | +, >2/y       | +, $\geq 2/y$   | NA            | -             | +, $\geq 2/y$     | +, $\geq 2/y$ | +                   |  |
| _Tophi                                                                | +              | +                     | +             | NA                 | +               | +                | +                 | -              | NA           | -             | -             | +             | NA              | NG             | NA                 | +             | +               | NA            | +             | +                 | +             | +                   |  |
| _Urate nephrolithiasis                                                | -              | +                     | +             | NA                 | +               | -                | +                 | -              | NA           | +             | -             | -             | NA              | NG             | NA                 | -             | +               | NA            | +             | +                 | +             | +                   |  |
| _Arthropathy                                                          | -              | +                     | -             | NA                 | +               | -                | -                 | -              | NA           | -             | -             | +             | NA              | NG             | NA                 | +             | +               | NA            | +             | -                 | +             | +                   |  |
| _Comorbidities‡                                                       | -              | +                     | +             | NA                 | -               | -                | +                 | +              | NA           | +             | -             | -             | NA              | NG             | NA                 | -             | +               | NA            | -             | +                 | +             | +                   |  |
| _Others§                                                              | +              | +                     | +             | NA                 | -               | -                | -                 | +              | NA           | -             | +             | -             | NA              | NG             | NA                 | -             | +               | NA            | -             | -                 | +             | +                   |  |
| Initiate ULT during or after an acute attack (Aft[time after attack]) | Aft            | Aft                   | NG            | Aft (4-6 w)        | Aft             | Aft (2w)         | D                 | NA             | Aft          | D/Aft (2w)    | NG            | NG            | Aft             | NG             | NG                 | NG            | IE              | IE            | Aft           | NG                | Aft           | Aft                 |  |
| First line ULT drug(s)                                                | NG             | A                     | A             | NG                 | A, F            | A, B             | A, F              | NG             | A            | NG            | A, F, A       | A             | A               | NG             | A                  | NG            | A               | NG            | NG            | NG                | A             | NG                  |  |

|                                                                                          |        |         |    |    |     |             |         |              |          |         |         |         |            |    |           |       |      |     |       |        |          |            |
|------------------------------------------------------------------------------------------|--------|---------|----|----|-----|-------------|---------|--------------|----------|---------|---------|---------|------------|----|-----------|-------|------|-----|-------|--------|----------|------------|
|                                                                                          |        |         |    |    |     |             |         |              |          |         | B       |         |            |    |           |       |      |     |       |        |          |            |
| <b>Second line ULT drug(s)</b>                                                           | NG     | P       | NG | NG | P   | NG          | P       | NG           | U, F     | NG      | NG      | F, P, B | F, B, P, U | NG | P, B, F   | NG    | F, U | NG  | NG    | NG     | F        | NG         |
| <b>Allopurinol use</b>                                                                   |        |         |    |    |     |             |         |              |          |         |         |         |            |    |           |       |      |     |       |        |          |            |
| <b>_Maximum dose (mg/d)</b>                                                              | 300    | NG      | NG | NG | 800 | NG          | 800     | 600          | NG       | 600     | 800-900 | 800     | NG         | NG | 900       | NG    | NG   | NG  | 800   | NG     | 900      | 600        |
| <b>_RF to initiate dose adjustment (eGFR in ml/min/1.73m<sup>2</sup>, CCr in mL/min)</b> | CCr 60 | CCr 80  | NG | NG | NG  | NG          | CK D4   | NG           | NG       | CCr 60  | CCr 140 | CCr 20  | NG         | NG | NG        | NG    | NG   | NG  | NG    | NG     | eGFR 130 | 1.5mg/eGFR |
| <b>_Starting dose in normal RF (mg/d)</b>                                                | 50-100 | 100-150 | NG | NG | 100 | 50          | ≤100    | 50           | NG       | 100-150 | NG      | 100     | NG         | NG | NG        | 100   | 100  | NG  | 100   | 50-100 | 200      | 50-100     |
| <b>_HLA-B*5801 gene screening</b>                                                        | -      | -       | -  | -  | -   | -           | +       | -            | -        | +       | -       | -       | -          | NG | -         | -     | -    | -   | +     | -      | +        | +          |
| <b>Prophylaxis before ULT</b>                                                            | +      | NG      | NG | NG | +   | NG          | NG      | NG           | NG       | NG      | NG      | NG      | NG         | NG | NG        | NG    | NG   | NG  | NG    | NG     | NG       | NG         |
| <b>Prophylaxis with ULT</b>                                                              | +      | +       | NG | NG | +   | +           | +       | NG           | +        | +       | +       | +       | +          | NG | +         | +     | +    | +   | +     | +      | +        | +          |
| <b>Duration for prophylaxis</b>                                                          | 1-3 m¶ | 1-6 m** | NG | NG | NG  | NG          | 3-6 m†† | NG           | Un-clear | 6m      | >6m     | NG      | >6m        | NG | Vari-ed‡‡ | 3-6 m | NG   | >6m | 3-6 m | >8w    | <6m      | 3-6m       |
| <b>Pharmacological ULT for asymptomatic hyperuricemia?</b>                               | -      | +       | NG | -  | -   | +           | IE      | +            | IE       | IE      | NG      | NG      | -§§        | NG | IE        | NG    | NG   | IE  | -     | NG     | -        | NG         |
| <b>_Comorbidities</b>                                                                    | NA     | -       | NA | NA | NA  | +           | NA      | +            | NA       | NA      | NA      | NA      | -          | NG | NA        | NA    | NA   | NA  | NA    | NA     | NA       | NA         |
| <b>_SUA cut-offs, µmol/L [mg/dL]</b>                                                     | NA     | [10-13] | NA | NA | NA  | [8.0-9.0]¶¶ | NA      | [8.0-9.0]*** | NA       | NA      | NA      | NA      | [9.0]¶¶    | NG | NA        | NA    | NA   | NA  | NA    | NA     | NA       | NA         |

\* The general target was the target serum uric acid level for long term control recommended for all patients on pharmacological urate lowering therapy.

† The intensive target the intensive target was the target serum uric acid level for long term control recommended for patients with tophi [16, 17, 22, 36, 38, 40, 43], with recurrent attacks [16, 21, 22], or with chronic gouty arthritis [16, 22], or to prevent crystal formation [21], or to improve gout signs and symptoms [14, 15]. One document provided stricter target for any patient with gout [37], and one for patients with severe gout without clear definition [39].

‡ Comorbidities considered as the indication for ULT include renal impairment [14-16, 19-22, 37, 49, 50], cardiovascular risk or cardiovascular diseases [16, 22, 47], glucose intolerance or DM, lipid disorder, and obesity [22].

1  
2  
3  
4  
5  
6 § Others indications considered for pharmacological ULT include joint damage [21], diuretic therapy use [21], young age [16, 21, 22] with some documents defined as less  
7 than 40 years old [16, 22], high SUA level defined as >8mg/dL (480 umol/L) [16] or >13mg/dl [50], impending cytotoxic chemotherapy or radiotherapy for lymphoma or  
8 leukaemia [49], persistently raised uric acid levels and willingness to continue lifelong therapy [51]. Some documents evaluated SUA levels in patients after lifestyle  
9 modification and indicated pharmacological ULT in individuals with SUA above 6 mg/dL [46], or with SUA above 8mg/dl with CV risk or CVD and above 9mg/dl without  
10 CV risk or CVD [47].

11  
12 || The starting dose of allopurinol in patients with renal impairment should not exceed 1.5mg/eGFR.

13  
14 ¶ Prophylaxis should be continued until the serum urate is normal and the patient has not had any attacks for 1-3 months.

15  
16 \*\* Prophylaxis should be continued until 6 months free of acute attacks or until 1 month with target serum urate level achieved.

17  
18 †† Prophylaxis should be continued for 1) 6 months' duration, 2) 3 months after achieving the target serum urate level for the patient without tophi detected on physical  
19 examination, or 3) 6 months after achieving the target serum urate level, where there has been resolution of tophi previously detected on physical examination.

20  
21 ‡‡ The during for prophylaxis varied and depends on the presence of tophi and comorbidities and on serum urate response. But prophylaxis should be continued until the  
22 target SUA is reached or until the tophi has resolved.

23  
24 §§ The recommendations provided were conflict within the same document.

25  
26 |||| Pharmacological urate lowering therapy is recommended in male patients with serum uric acid >13 mg/dL and in female patients with serum uric acid >10 mg/dL.

27  
28 ¶¶ Pharmacological urate lowering therapy is recommended in patients with serum uric acid >8 mg/dL if with complications or >9 mg/dL in all patients.

29  
30 \*\*\* Pharmacological urate lowering therapy is recommended in patients with serum uric acid >8 mg/dL if with cardiovascular disease or cardiovascular risk factors or >9  
31 mg/dL if without cardiovascular disease or cardiovascular risk factors.

**Supplementary Table 11. Summary of recommendations for the treatment of acute gout by included guidance documents**

NG: not given; NSAIDs: non-steroidal anti-inflammatory drugs.

|                              | What is the first line pharmacological treatment option? | Is colchicine recommended to be given as a fixed dose or as a loading dose + followed doses? | Is intra-articular steroids recommended? | What are the indications for intra-articular steroids? | Which line is intra-articular steroids recommended to be? | Is systemic steroids recommended? | What are the indications for systemic steroids?                                                                                                                | Which line of option is systemic steroids recommended to be? |
|------------------------------|----------------------------------------------------------|----------------------------------------------------------------------------------------------|------------------------------------------|--------------------------------------------------------|-----------------------------------------------------------|-----------------------------------|----------------------------------------------------------------------------------------------------------------------------------------------------------------|--------------------------------------------------------------|
| <b>SAMA_2003 [51]</b>        | NSAIDs                                                   | 1 mg loading + 0.5 mg 2-hourly                                                               | Yes                                      | Contraindicated to NSAIDs and joint accessible         | NG                                                        | Yes                               | Contraindicated or not responding to NSAIDs or polyarthritis                                                                                                   | NG                                                           |
| <b>MOH_MSR_AMM_2008 [49]</b> | NSAIDs                                                   | NG (0.5mg - 0.6mg bd-qds)                                                                    | Yes                                      | NG                                                     | NG                                                        | Yes                               | Elderly people, renal insufficiency, hepatic dysfunction, cardiac failure, peptic ulcer disease, and hypersensitivity to NSAIDs                                | NG                                                           |
| <b>PRA_2008 [50]</b>         | NSAIDs                                                   | NG (0.5 mg bid-qid)                                                                          | NG                                       | NG                                                     | NG                                                        | Yes                               | Contraindicated to NSAIDs                                                                                                                                      | NG                                                           |
| <b>UTAustin_2009 [52]</b>    | NSAIDs                                                   | 1-1.2 mg loading + 0.5-0.6 mg every 2-3 hours                                                | Yes                                      | Only 1-2 joints is involved                            | Third                                                     | Yes                               | Contraindicated or not responding to NSAIDs and colchicine and polyarthritis                                                                                   | Third                                                        |
| <b>EULAR_2011 [17]</b>       | Colchicine, NSAIDs, glucocorticoids                      | 1.2 mg loading + 0.6 mg 1 hour later                                                         | Yes                                      | NG                                                     | NG                                                        | Yes                               | Contraindications to NSAIDs and colchicine                                                                                                                     | First                                                        |
| <b>JSGNAM_2011 [48]</b>      | Colchicine, NSAIDs                                       | Fixed (0.5 mg)                                                                               | NG                                       | NG                                                     | NG                                                        | Yes                               | Contraindicated or not responding to NSAIDs or polyarthritis                                                                                                   | Second                                                       |
| <b>ACR_2012 [14, 15]</b>     | NSAIDs, corticosteroids, colchicine                      | 1.2 mg loading + 0.6 mg 1 hour later                                                         | Yes                                      | Involvement of 1 or 2 large joints                     | First                                                     | Yes                               | Oral steroids for involvement of 1 or 2 joints or when intra-articular joint injection is impractical. Intravenous steroids for the nothing by mouth patients. | First                                                        |
| <b>3e_2013 [36]</b>          | NSAIDs, colchicine, glucocorticoids                      | NG (<2 mg daily)                                                                             | Yes                                      | NG                                                     | First                                                     | Yes                               | NG                                                                                                                                                             | First                                                        |
| <b>CSE_2013 [37]</b>         | NSAIDs,                                                  | NG                                                                                           | NG                                       | NG                                                     | NG                                                        | NG                                | NG                                                                                                                                                             | NG                                                           |

|                            |                                           |                                                    |     |                                                                                           |       |     |                                                                                        |        |
|----------------------------|-------------------------------------------|----------------------------------------------------|-----|-------------------------------------------------------------------------------------------|-------|-----|----------------------------------------------------------------------------------------|--------|
|                            | colchicine,<br>corticosteroids            |                                                    |     |                                                                                           |       |     |                                                                                        |        |
| <b>SER_2013 [46]</b>       | NSAIDs                                    | NG                                                 | Yes | Monoarthritis                                                                             | NG    | Yes | Contraindicated to NSAIDs                                                              | NG     |
| <b>SIR_2013 [45]</b>       | NSAIDs,<br>colchicine                     | NG (<2 mg daily)                                   | Yes | NG                                                                                        | NG    | Yes | Intolerance or contraindications to NSAIDs and colchicine                              | NG     |
| <b>3e_PT_2014 [40]</b>     | Colchicine,<br>NSAIDs                     | Fixed low dose                                     | Yes | NG                                                                                        | NG    | Yes | NG                                                                                     | NG     |
| <b>FMOH_2014 [44]</b>      | NG                                        | NG                                                 | NG  | NG                                                                                        | NG    | NG  | NG                                                                                     | NG     |
| <b>3e_AU_NZ_2015 [43]</b>  | NSAIDs,<br>colchicine,<br>glucocorticoids | NG (1.8 g in 24 h)                                 | Yes | NG                                                                                        | First | Yes | NG                                                                                     | First  |
| <b>CRA_2016 [41]</b>       | NSAIDs                                    | NG (1.5-1.8 mg/d)                                  | NG  | NG                                                                                        | NG    | Yes | Contraindications to NSAIDs and colchicine                                             | NG     |
| <b>EULAR_2016 [16]</b>     | Colchicine,<br>NSAIDs,<br>corticosteroid  | 1 mg loading + 0.5 mg<br>1 hour later              | Yes | NG                                                                                        | First | Yes | NG                                                                                     | First  |
| <b>T2T_2016 [39]</b>       | Anti-inflammatory<br>medications          | NG                                                 | NG  | NG                                                                                        | NG    | NG  | NG                                                                                     | NG     |
| <b>TRA_2016 [38]</b>       | NSAIDs                                    | Fixed (0.5 mg bid) or 1<br>mg loading + 0.5 mg tid | Yes | Involvement of 1-2 major<br>joints, contraindications<br>to both colchicine and<br>NSAIDs | NG    | Yes | Contraindications to NSAIDs and colchicine                                             | NG     |
| <b>ACP_2017 [19, 20]</b>   | Corticosteroids                           | 1.2 mg loading + 0.6<br>mg 1 hour later            | NG  | NG                                                                                        | NG    | Yes | If not contraindicated.                                                                | First  |
| <b>BSR_2017 [21]</b>       | NSAIDs,<br>colchicine                     | NG (500 mg bd-qds)                                 | Yes | Patients with acute illness<br>and comorbidity                                            | First | Yes | Intolerance to NSAIDs and colchicine and<br>intra-articular injection is not feasible. | Second |
| <b>CRA_multi_2017 [22]</b> | NSAIDs,<br>colchicine                     | 1 mg loading + 0.5 mg<br>at 1h, 12h                | Yes | Involvement of 1-2 major<br>joints and not responding<br>to systemic treatment            | NG    | Yes | Contraindicated to or not responding to<br>NSAIDs and colchicine                       | NG     |

**Supplementary Table 12. Summary of recommendations for the treatment of tophi by included guidance documents**

A: allopurinol; B: benzbromarone; F: febuxostat; NA: not applicable; NG: not given; P: pegloticase; R: rasburicase; ULT: urate lowering therapy; WH: wound healing.

|                                      | SAMA_2003 [51] | MOH_MSR_AMM_2008 [49] | PRA_2008 [50] | UTAustin_2009 [52] | EULAR_2011 [17] | JSGNAM_2011 [48] | ACR_2012 [14, 15] | 3e_2013 [36] | CSE_2013 [37] | SER_2013 [46] | SIR_2013 [45] | 3e_PT_2014 [40] | FMOH_2014 [44] | 3e_AU_NZ_2015 [43] | CRA_2016 [41] | EULAR_2016 [16] | T2T_2016 [39] | TRA_2016 [38] | ACP_2017 [19, 20] | BSR_2017 [21] | CRA_multi_2017 [22] |
|--------------------------------------|----------------|-----------------------|---------------|--------------------|-----------------|------------------|-------------------|--------------|---------------|---------------|---------------|-----------------|----------------|--------------------|---------------|-----------------|---------------|---------------|-------------------|---------------|---------------------|
| <b>Is surgery recommended?</b>       | +              | +                     | NG            | NG                 | NG              | +                | NG                | +            | NG            | NG            | NG            | +               | NG             | +                  | NG            | NG              | IE            | +             | NG                | -             | +                   |
| <b>Indications for surgery</b>       | NG             | +                     | NG            | NG                 | NG              | NG               | NG                | +            | NG            | NG            | NG            | NG              | NG             | +                  | NG            | NG              | NG            | +             | NG                | NG            | +                   |
| <b>_Nerve compression</b>            | NA             | -                     | NA            | NA                 | NA              | NA               | NA                | +            | NA            | NA            | NA            | NA              | NA             | +                  | NA            | NA              | NA            | +             | NA                | NA            | +                   |
| <b>_Infection</b>                    | NA             | -                     | NA            | NA                 | NA              | NA               | NA                | +            | NA            | NA            | NA            | NA              | NA             | +                  | NA            | NA              | NA            | +             | NA                | NA            | -                   |
| <b>_Mechanical impingement</b>       | NA             | -                     | NA            | NA                 | NA              | NA               | NA                | +            | NA            | NA            | NA            | NA              | NA             | +                  | NA            | NA              | NA            | -             | NA                | NA            | -                   |
| <b>_Loss of mobility</b>             | NA             | +                     | NA            | NA                 | NA              | NA               | NA                | -            | NA            | NA            | NA            | NA              | NA             | -                  | NA            | NA              | NA            | +             | NA                | NA            | -                   |
| <b>_Severe pain</b>                  | NA             | +                     | NA            | NA                 | NA              | NA               | NA                | -            | NA            | NA            | NA            | NA              | NA             | -                  | NA            | NA              | NA            | +             | NA                | NA            | -                   |
| <b>_Tophaceous ulcer</b>             | NA             | +                     | NA            | NA                 | NA              | NA               | NA                | -            | NA            | NA            | NA            | NA              | NA             | -                  | NA            | NA              | NA            | -             | NA                | NA            | +                   |
| <b>_Others*</b>                      | NA             | +                     | NA            | NA                 | NA              | NA               | NA                | -            | NA            | NA            | NA            | NA              | NA             | -                  | NA            | NA              | NA            | +             | NA                | NA            | +                   |
| <b>Risks of surgery</b>              | WH             | NG                    | NG            | NG                 | NG              | NG               | NG                | NG           | NG            | NG            | NG            | NG              | NG             | NG                 | NG            | NG              | NG            | NG            | NG                | NG            | NG                  |
| <b>Is long-term ULT recommended?</b> | +              | +                     | +             | NG                 | +               | +                | +                 | +            | +             | +             | +             | +               | NG             | +                  | +             | +               | +             | +             | +                 | +             | +                   |
| <b>Is any ULT drug recommended?</b>  | A              | -                     | -             | -                  | P               | -                | P                 | -            | B             | F             | NA            | -               | -              | P                  | -             | P               | -             | -             | -                 | P, R          | -                   |

\* Other indications for surgery include large tophi [22], persistent tophi [22], joint deformation [38], major joint destruction [49], pressure symptoms [49], and cosmetic [49].

Supplementary Figure 1. Standardized domain scores by the year of publication

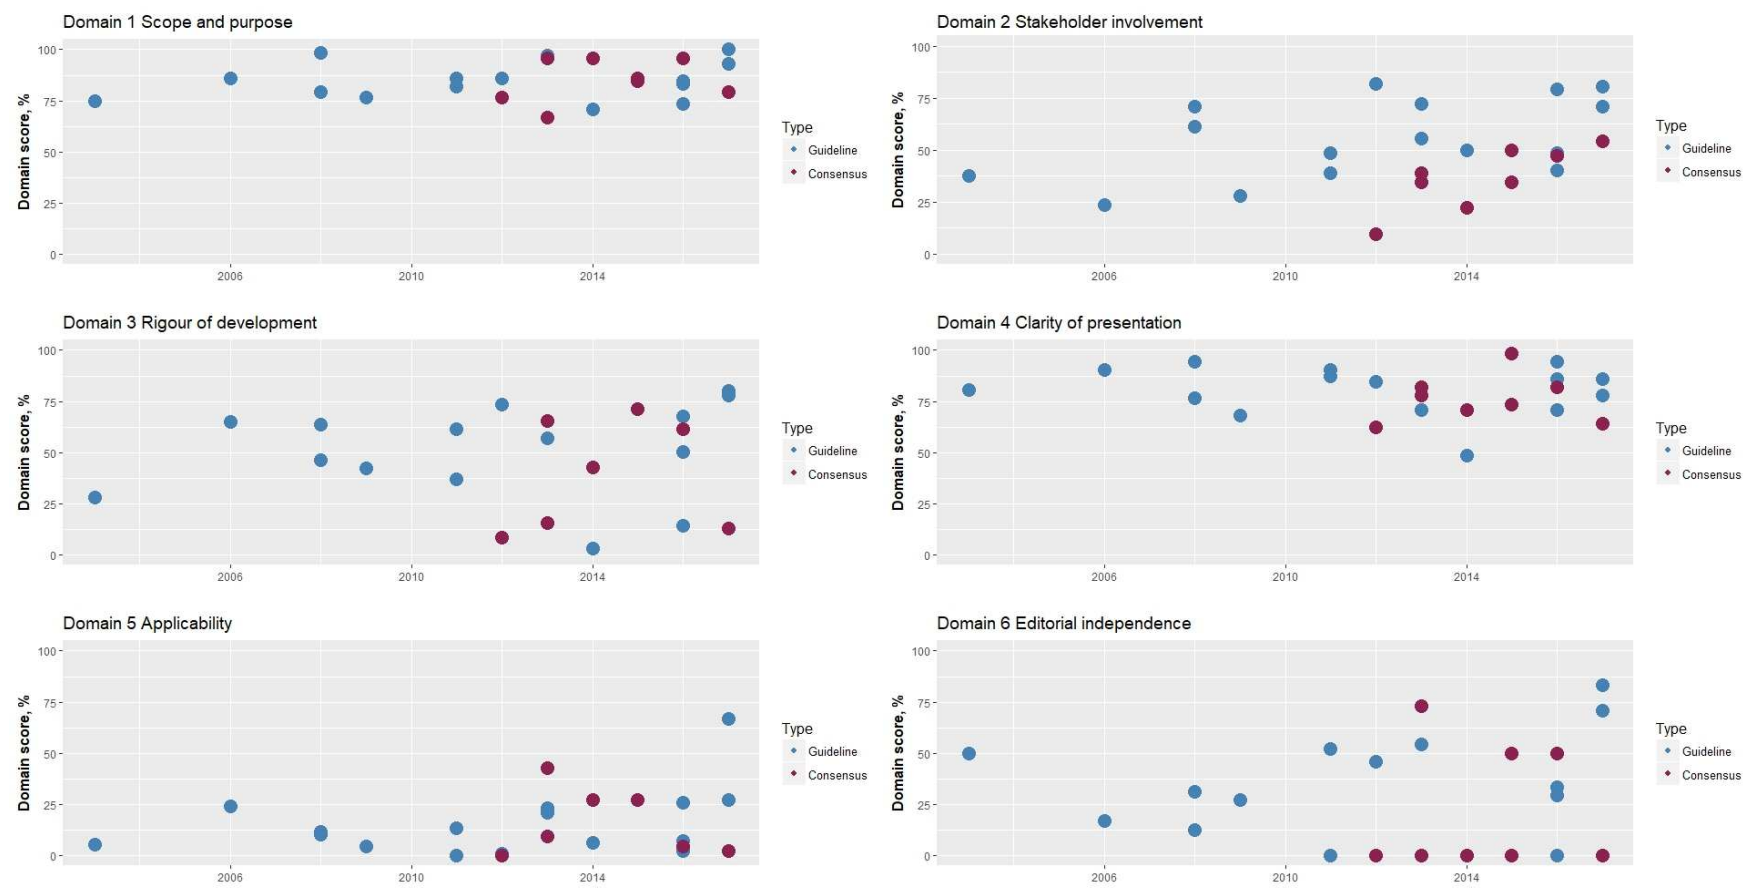

## Supplementary File 1. Instructions for Guideline Appraisal Using the AGREE II Instrument

### TRAINING MATERIALS

- Online tutorial: <http://www.agreetrust.org/resource-centre/agree-ii-training-tools/>
- User's Manual:  
[http://www.agreetrust.org/wp-content/uploads/2013/06/AGREE\\_II\\_Users\\_Manual\\_and\\_23-item\\_Instrument\\_ENGLISH.pdf](http://www.agreetrust.org/wp-content/uploads/2013/06/AGREE_II_Users_Manual_and_23-item_Instrument_ENGLISH.pdf)

### PROLOGUE

- The Appraisal of Guidelines for REsearch & Evaluation (AGREE) Instrument is an international, validated and rigorously developed tool to evaluate the quality of clinical practice guidelines and consensus statements.
- The AGREE II instrument was published in 2010 and consists of 23 key items organized within 6 domains followed by 2 global rating items (“Overall Assessment”). Each domain captures a unique dimension of guideline quality.
  - Scope and purpose
  - Stakeholder involvement
  - Rigour of development
  - Clarity of presentation
  - Applicability
  - Editorial independence.
- Reviewers score each item on a 7-point Likert Scale.
  - 1 - Strongly disagree
  - 7 - Strongly agree
  - For the majority of items, we use an ‘add-up’ strategy to score, that is, corresponding scores will be added to 1’ if information on predefined aspects is provided. For only one item, we subtract scores from 7’.
- Domain scores will be calculated as: (obtained score-minimal possible score)/(maximal possible score-minimal possible score)

### DETAILED INSTRUCTIONS FOR SCORING

(adapted from AGREE II User’s Manual [28])

#### Domain 1 Scope and Purpose

**Item 1 Objectives: The overall objective(s) of the guideline is (are) specifically described.**

##### Instructions:

Information on three aspects should be provided (add corresponding scores for each aspect, 5’ in total):

a) Health intent, i.e., prevention, screening, diagnosis, treatment, etc. (2’);

b) Expected benefit or outcome (2’);

- *Clarification:* If gout epidemiology is provided as background information (i.e., the importance or significance of the diagnosis and management of gout/hyperuricemia is stated), 1’ will be given. If clear statements, such as “to prevent (long term) complications of patients with diabetes mellitus” “to lower the risk of subsequent vascular events in patients with previous myocardial infarction”, are provided, 2’ will be given.

c) Target, e.g., patient population, society (1’).

Performance: Is the item well written and is the content easy to find? (1’)



1 Related *Report Criteria* from *User's Manual*: • health intent(s) (i.e., prevention, screening, diagnosis,  
2 treatment, etc.) • expected benefit or outcome • target(s) (e.g., patient population, society)  
3  
4

5 **Item 2 Questions: The health question(s) covered by the guideline is (are) specifically described.**

6 Instructions:

7 Information on five aspects should be provided (add corresponding scores for each aspect, 5' in total):

- 8 a) Target population (2');  
9  
10 b) Intervention or exposure (if appropriate, 1');  
11  
12 c) Comparisons (if appropriate, 1');  
13  
14 d) Outcome (1');  
15 e) Health care setting or context (1').

16 Performance: Is the item well written and is the content easy to find? (1')

17 Note:

- 18 1) If c) is not appropriate, no score will be subtracted.  
19  
20 2) It is not necessary to have this information provided in questions. Reviewers can try to paraphrase  
21 2-3 key recommendations into questions to see the information above is provided and score based  
22 on paraphrased questions.  
23

24 Related *Report Criteria* from *User's Manual*: • target population • intervention(s) or exposure(s) •  
25 comparisons (if appropriate) • outcome(s) • health care setting or context  
26  
27

28 **Item 3 Population: The population (patients, public, etc.) to whom the guideline is meant to apply**  
29 **is specifically described.**

30 Instructions:

31 A default full score (7') should be considered. Subtract 1-2 points where the population is not clearly  
32 described or where the descriptions in the guideline is contradictory (e.g., a guideline stating "to treat  
33 asymptomatic hyperuricaemia" in the introduction, while stating "to treat hyperuricaemia and gout" in the  
34 title and providing no specific definition of patients' condition in recommendations).  
35  
36  
37  
38

39 Related *Report Criteria* from *User's Manual*: • target population, gender and age • clinical condition (if  
40 relevant) • severity/stage of disease (if relevant) • comorbidities (if relevant) • excluded populations (if  
41 relevant)  
42  
43

44 **Domain 2 Stakeholder Involvement**

45 **Item 4 Group Membership: The guideline development group includes individuals from all**  
46 **relevant professional groups.**

47 Instructions:

48 Information on two aspects should be provided (add corresponding scores for each aspect, 5' in total):

- 49 a) The guideline development group is stated (1');  
50  
51 b) For each member of the guideline development group, the following information is included (1' each):  
52 name (1'), discipline/content expertise (e.g., neurosurgeon, methodologist, 1'), institution (e.g., St. Peter's  
53 hospital, 1'), a description of the member's role in the guideline development group (1')  
54 - *Clarification*: Please subtract 1' if no methodologist (i.e., epidemiologist) is inferred from the  
55 discipline/content expertise.  
56

57 Performance: Is the item well written and is the content easy to find? (1')  
58  
59

Note: Where the relation between the guideline development group and the authors is unclear, the authors of the guidance document will be considered as equivalent to the guideline development group.

Related *Report Criteria* from *User's Manual*: • For each member of the guideline development group, the following information is included: name, discipline/content expertise (e.g., neurosurgeon, methodologist), institution (e.g., St. Peter's hospital), geographical location (e.g., Seattle, WA), a description of the member's role in the guideline development group

### **Item 5 Target Population Preferences and Views: The views and preferences of the target population (patients, public, etc.) have been sought.**

#### Instructions:

Information the following four aspects should be provided (add corresponding scores for each aspect, 6' in total):

- a) Statement of type of strategy used to capture patients'/public's' views and preferences (e.g., participation in the guideline development group, literature review of values and preferences, 2');
- b) Methods by which preferences and views were sought (e.g., evidence from literature, surveys, focus groups, 1');
- c) Outcomes/information gathered on patient/public information (2');
- d) Description of how the information gathered was used to inform the guideline development process and/or formation of the recommendations (1')

- *Clarification*: If a patient representative is included in the guideline development panel, scores on aspects a), b), and d) will be given as default.

Related *Report Criteria* from *User's Manual*: • statement of type of strategy used to capture patients'/public's' views and preferences (e.g., participation in the guideline development group, literature review of values and preferences) • methods by which preferences and views were sought (e.g., evidence from literature, surveys, focus groups) • outcomes/information gathered on patient/public information • description of how the information gathered was used to inform the guideline development process and/or formation of the recommendations

### **Item 6 Target Users: The target users of the guideline are clearly defined.**

#### Instructions:

Information on two aspects should be provided (add corresponding scores for each aspect, 6' in total):

- a) Clear description of intended guideline audience (e.g. specialists, family physicians, patients, clinical or institutional leaders/administrators, 3');
- b) Description of how the guideline may be used by its target audience (e.g., to inform clinical decisions, to inform policy, to inform standards of care, 3')

Related *Report Criteria* from *User's Manual*: • clear description of intended guideline audience (e.g. specialists, family physicians, patients, clinical or institutional leaders/administrators) • description of how the guideline may be used by its target audience (e.g., to inform clinical decisions, to inform policy, to inform standards of care)

## **Domain 3 Rigour of Development**

### **Item 7 Search Methods: Systematic methods were used to search for evidence.**

#### Instructions:

Information on four aspects should be provided (add corresponding scores for each aspect, 6' in total):

- a) Named electronic database(s) or evidence source(s) where the search was performed (e.g., MEDLINE, EMBASE, PsychINFO, CINAHL, 2');
- b) Time periods searched (e.g., January 1, 2004 to March 31, 2008, 1');
- c) Search terms used (e.g., text words, indexing terms, subheadings, 1');
- d) Full search strategy included (e.g., possibly located in appendix, 2')

Related *Report Criteria* from *User's Manual*: • named electronic database(s) or evidence source(s) where the search was performed (e.g., MEDLINE, EMBASE, PsychINFO, CINAHL) • time periods searched (e.g., January 1, 2004 to March 31, 2008) • search terms used (e.g., text words, indexing terms, subheadings) • full search strategy included (e.g., possibly located in appendix)

### **Item 8 Evidence Selection Criteria: The criteria for selecting the evidence are clearly described.**

#### Instructions:

Information on both inclusion and exclusion criteria should be provided (add corresponding scores for each aspect, 6' in total):

a) Description of the inclusion criteria:

- a1) target population (patient, public, etc.) characteristics (2'),
- a2) study design (2),
- a4) outcomes (1'),

b) Description of the exclusion criteria (if relevant; e.g., French only listed in the inclusion criteria statement could logically preclude non-French listed in the exclusion criteria statement, 1').

Note: if a3), a5), a6), b) is not relevant, no score will be subtracted.

Related *Report Criteria* from *User's Manual*: • description of the inclusion criteria, including: target population (patient, public, etc.) characteristics, study design, comparisons (if relevant), outcomes, language (if relevant), context (if relevant) • description of the exclusion criteria (if relevant; e.g., French only listed in the inclusion criteria statement could logically preclude non-French listed in the exclusion criteria statement)

### **Item 9 Strengths and Limitations of The Evidence: The strengths and limitations of the body of evidence are clearly described.**

#### Instructions:

For each evidence, information on two aspects should be provided. If only some of the evidences report the following information, please first calculate the score based on the most informative evidence (e.g., scored 5'), and then subtract 1' to get the final score (e.g., 5'-1'=4').

For each evidence, both a general statement of the method and detailed descriptions should be provided:

a) A statement of the method used to evaluate the strengths and limitations of the evidence should be provided (3').

b) The stated method should evaluate at least three of the following aspects (add 1' for each aspect, maximum 3'):

- b1) Study design(s);
- b2) Study methodology limitations (e.g., sampling, blinding, allocation concealment, analytical methods);
- b3) Appropriateness/relevance of primary and secondary outcomes considered;
- b4) Consistency of results across studies;
- b5) Direction of results across studies;
- b6) Magnitude of benefit versus magnitude of harm;

1  
2  
3  
4  
5  
6  
7  
8  
9  
10  
11  
12  
13  
14  
15  
16  
17  
18  
19  
20  
21  
22  
23  
24  
25  
26  
27  
28  
29  
30  
31  
32  
33  
34  
35  
36  
37  
38  
39  
40  
41  
42  
43  
44  
45  
46  
47  
48  
49  
50  
51  
52  
53  
54  
55  
56  
57  
58  
59  
60

b7) Applicability to practice context

Related *Report Criteria* from *User's Manual*: • descriptions of how the body of evidence was evaluated for bias and how it was interpreted by members of the guideline development group • aspects upon which to frame descriptions include: study design(s) included in body of evidence, study methodology limitations (sampling, blinding, allocation concealment, analytical methods), appropriateness/relevance of primary and secondary outcomes considered, consistency of results across studies, direction of results across studies, magnitude of benefit versus magnitude of harm, applicability to practice context

**Item 10 Formulation of Recommendations: The methods for formulating the recommendations are clearly described.**

Instructions:

Information on three aspects should be provide (add 2' for each aspect, 6' in total):

- a) Description of the recommendation development process (e.g., steps used in modified Delphi technique, voting procedures that were considered, 2');
- b) Outcomes of the recommendation development process (e.g., extent to which consensus was reached using modified Delphi technique, outcome of voting procedures, 2');
- c) Description of how the process influenced the recommendations (e.g., results of Delphi technique influence final recommendation, alignment with recommendations and the final vote, 2')

Related *Report Criteria* from *User's Manual*: • description of the recommendation development process (e.g., steps used in modified Delphi technique, voting procedures that were considered) • outcomes of the recommendation development process (e.g., extent to which consensus was reached using modified Delphi technique, outcome of voting procedures) • description of how the process influenced the recommendations (e.g., results of Delphi technique influence final recommendation, alignment with recommendations and the final vote)

**Item 11 Consideration of Benefits and Harms: The health benefits, side effects, and risks have been considered in formulating the recommendations.**

Instructions:

For each recommendation, information on four aspects should be provided. If only some of the recommendations report the following information, please first calculate the score based on the most informative recommendation (e.g., scored 5'), and subtract 1' to get the final score (e.g., 5'-1'=4').

For each recommendation, information on four aspects should be provided (add corresponding scores for each aspect, 6' in total):

- a) Supporting data and report of benefits (2'); b) Supporting data and report of harms/side effects/risks (2');  
- *Clarification:* Data on a) and b) can be provided as references.
- c) Reporting of the balance/trade-off between benefits and harms/side effects/risks (1');
- d) Recommendations reflect considerations of both benefits and harms/side effects/risks (1')

Related *Report Criteria* from *User's Manual*: • supporting data and report of benefits • supporting data and report of harms/side effects/risks • reporting of the balance/trade-off between benefits and harms/side effects/risks • recommendations reflect considerations of both benefits and harms/side effects/risks

**Item 12 Link Between Recommendations and Evidence: There is an explicit link between the recommendations and the supporting evidence.**

1            Instructions:

2            Information on three aspects should be provided (add 2' for each aspect, 6' in total):

3            a) The guideline describes how the guideline development group linked and used the evidence to inform  
4            recommendations (2');

5            - *Clarification:* Can be provided as narrative summaries and/or discussions of evidences.

6            b) Each recommendation is linked to a key evidence description/paragraph and/or reference list (2');

7            - *Note:* Please subtract 1' if only some recommendations meet criterium b).

8            c) Recommendations linked to evidence summaries, evidence tables in the results section of the guideline  
9            (2')

10           Related *Report Criteria* from *User's Manual*: • the guideline describes how the guideline development  
11           group linked and used the evidence to inform recommendations • each recommendation is linked to a key  
12           evidence description/paragraph and/or reference list • recommendations linked to evidence summaries,  
13           evidence tables in the results section of the guideline

14           **Item 13    External Review: The guideline has been externally reviewed by experts prior to its  
15           publication.**

16           Instructions:

17           Information on five aspects should be provided (add corresponding scores for each aspect, 6' in total):

18           a) Purpose and intent of the external review (e.g., to improve quality, gather feedback on draft  
19           recommendations, assess applicability and feasibility, disseminate evidence, 1');

20           b) Methods taken to undertake the external review (e.g., rating scale, open-ended questions, 1');

21           c) Description of the external reviewers (e.g., number, type of reviewers, affiliations, 1');

22           d) Outcomes/information gathered from the external review (e.g., summary of key findings, 1');

23           e) Description of how the information gathered was used to inform the guideline development process  
24           and/or formation of the recommendations (e.g., guideline panel considered results of review in forming  
25           final recommendations, 2')

26           - *Clarification:* Publication through a peer-reviewed journal can be considered as externally reviewed.

27           Note: If dates of revision and acceptance is provided on the document, it is also considered externally  
28           reviewed.

29           Related *Report Criteria* from *User's Manual*: • purpose and intent of the external review (e.g., to improve  
30           quality, gather feedback on draft recommendations, assess applicability and feasibility, disseminate  
31           evidence) • methods taken to undertake the external review (e.g., rating scale, open-ended questions) •  
32           description of the external reviewers (e.g., number, type of reviewers, affiliations) • outcomes/information  
33           gathered from the external review (e.g., summary of key findings) • description of how the information  
34           gathered was used to inform the guideline development process and/or formation of the recommendations  
35           (e.g., guideline panel considered results of review in forming final recommendations)

36           **Item 14    Updating Procedure: A procedure for updating the guideline is provided.**

37           Instructions:

38           Information on three aspects should be provided (add 2' for each aspect, 6' in total):

39           a) A statement that the guideline will be updated (2');

40           b) Explicit time interval or explicit criteria to guide decisions about when an update will occur (2');

41           c) Methodology for the updating procedure is reported (2')

42           Related *Report Criteria* from *User's Manual*: • a statement that the guideline will be updated • explicit

1 time interval or explicit criteria to guide decisions about when an update will occur • methodology for the  
2 updating procedure is reported  
3  
4

#### 5 **Domain 4 Clarity of Presentation**

##### 6 **Item 15 Specific and Unambiguous Recommendations: The recommendations are specific and** 7 **unambiguous.**

###### 8 Instructions:

9 For each recommendation, information on four aspects should be provided. If only some of the  
10 recommendations report the following information, please first calculate the score based on the most  
11 informative recommendation (e.g., scored 5'), and then subtract 1' to get the final score (e.g., 5'-1'=4').  
12  
13

14 For each recommendation, information on four aspects should be provided (add corresponding scores for  
15 each aspect, 6' in total):

16 a) If a recommendation is uncertain, the uncertainty should be reflected in the recommendation and also be  
17 explicitly stated (2')

18 b) Identification of the intent or purpose of the recommended action (e.g., to improve quality of life, to  
19 decrease side effects, 2');

20 - *Clarification:* If the benefit for uric acid lowering in patients with CVD is not clearly stated, the score for  
21 this aspect should not be added.

22 c) Identification of the relevant population (e.g., patients, public, 1');

23 d) Caveats or qualifying statements, if relevant (e.g., patients or conditions for whom the recommendations  
24 would not apply, 1').

25 Note: if c) is not relevant, no score will be subtracted.  
26  
27  
28  
29

30 Related *Report Criteria* from *User's Manual*: • statement of the recommended action • identification of the  
31 intent or purpose of the recommended action (e.g., to improve quality of life, to decrease side effects) •  
32 identification of the relevant population (e.g., patients, public) • caveats or qualifying statements, if  
33 relevant (e.g., patients or conditions for whom the recommendations would not apply)  
34  
35  
36

##### 37 **Item 16 Management Options: The different options for management of the condition or health issue** 38 **are clearly presented.**

###### 39 Instructions:

40 Information on two aspects should be provided (add 3' for each aspect, 6' in total):

41 a) Description of options (3');

42 b) Description of population or clinical situation most appropriate to each option (3')

43 - *Note:* Please subtract 1' if only some options are provided with the most appropriate population or  
44 clinical situation.  
45  
46  
47

48 Related *Report Criteria* from *User's Manual*: • description of options • description of population or clinical  
49 situation most appropriate to each option  
50

##### 51 **Item 17 Identifiable Key Recommendations: Key recommendations are easily identifiable.**

###### 52 Instructions:

53 Reporting style should follow two criteria (add 3' for each aspect, 6' in total):

54 a) Description of recommendations in a summarized box, typed in bold, underlined, or presented as flow  
55 charts or algorithms (3');

56 b) Specific recommendations are grouped together in one section (3')  
57  
58  
59

1 - *Clarification*: If recommendations are summarised in the abstract, scores for aspect b) can also be given.

2  
3  
4 Related *Report Criteria* from *User's Manual*: • description of recommendations in a summarized box,  
5 typed in bold, underlined, or presented as flow charts or algorithms • specific recommendations are  
6 grouped together in one section  
7

## 8 **Domain 5 Applicability**

### 9 **Item 18 Facilitators and Barriers to Application: The guideline describes facilitators and barriers to its application.**

#### 10 Instructions:

11 Information on four aspects should be provided (add corresponding scores for each aspect, 6' in total):

12 a) Identification of the types of facilitators and barriers that were considered (2');

13 - *Clarification*: Statements of that certain drugs are not available in certain regions can be considered as  
14 identification of the facilitators and barriers.

15 b) Methods by which information regarding the facilitators and barriers to implementing recommendations  
16 were sought (e.g., feedback from key stakeholders, pilot testing of guidelines before widespread  
17 implementation, 2');

18 c) Information/description of the types of facilitators and barriers that emerged from the inquiry (e.g.,  
19 practitioners have the skills to deliver the recommended care, sufficient equipment is not available to  
20 ensure all eligible members of the population receive mammography, 1');

21 d) Description of how the information influenced the guideline development process and/or formation of  
22 the recommendations (1')

23  
24 Related *Report Criteria* from *User's Manual*: • identification of the types of facilitators and barriers that  
25 were considered • methods by which information regarding the facilitators and barriers to implementing  
26 recommendations were sought (e.g., feedback from key stakeholders, pilot testing of guidelines before  
27 widespread implementation) • information/description of the types of facilitators and barriers that emerged  
28 from the inquiry (e.g., practitioners have the skills to deliver the recommended care, sufficient equipment  
29 is not available to ensure all eligible members of the population receive mammography) • description of  
30 how the information influenced the guideline development process and/or formation of the  
31 recommendations  
32  
33  
34  
35  
36  
37  
38  
39

### 40 **Item 19 Implementation Advice or Tools: The guideline provides advice and/or tools on how the recommendations can be put into practice.**

#### 41 Instructions:

42 Information on three aspects should be provided (add corresponding scores for each aspect, 6' in total):

43 a) An implementation section in the guideline (2');

44 b) Tools and resources to facilitate application (add 1' for each tool/resource, maximum 2'): guideline  
45 summary documents, links to check lists/algorithms, links to how-to manuals, solutions linked to barrier  
46 analysis (see Item 18), tools to capitalize on guideline facilitators (see Item 18), outcome of pilot test and  
47 lessons learned;

48 c) Directions on how users can access tools and resources (2')

49  
50 Related *Report Criteria* from *User's Manual*: • an implementation section in the guideline • tools and  
51 resources to facilitate application: guideline summary documents, links to check lists/algorithms, links to  
52 how-to manuals, solutions linked to barrier analysis (see Item 18), tools to capitalize on guideline  
53 facilitators (see Item 18), outcome of pilot test and lessons learned • directions on how users can access  
54  
55  
56  
57  
58  
59

1 tools and resources  
2  
3

4 **Item 20 Resource Implications: The potential resource implications of applying the  
5 recommendations have been considered.**

6 - *Clarification*: The aim of this item is to the cost information considered by the guideline.

7 Instructions:

8 Information on four aspects should be provided (add corresponding scores for each aspect, 6' in total):

- 9 a) Identification of the types of cost information that were considered (e.g., economic evaluations, drug  
10 acquisition costs, 2');  
11 b) Methods by which the cost information was sought (e.g., a health economist was part of the guideline  
12 development panel, use of health technology assessments for specific drugs, etc., 2');  
13 c) Information/description of the cost information that emerged from the inquiry (e.g., specific drug  
14 acquisition costs per treatment course, 1');  
15 d) Description of how the information gathered was used to inform the guideline development process  
16 and/or formation of the recommendations (1')

17  
18  
19  
20  
21 Related *Report Criteria* from *User's Manual*: • identification of the types of cost information that were  
22 considered (e.g., economic evaluations, drug acquisition costs) • methods by which the cost information  
23 was sought (e.g., a health economist was part of the guideline development panel, use of health technology  
24 assessments for specific drugs, etc.) • information/description of the cost information that emerged from  
25 the inquiry (e.g., specific drug acquisition costs per treatment course) • description of how the information  
26 gathered was used to inform the guideline development process and/or formation of the recommendations  
27  
28

29  
30 **Item 21 Monitoring or Auditing Criteria: The guideline presents monitoring and/or auditing criteria.**

31 - *Clarification*: The aim of this item is to evaluate the adherence to guidelines, but not to provide follow up  
32 parameters for diseases. *Monitoring* in this item refers to the action to monitor physicians' adherence to the  
33 guideline in daily practice by a group of investigators, but not to monitor the management of the disease in  
34 an individual patient. And the *auditing criteria* are the criteria to assess how well the guideline affects the  
35 practice in a region, but not how well the patients achieve the treatment target.  
36  
37

38 Instructions:

39 Information on four aspects should be provided (add corresponding scores for each aspect, 6' in total):

- 40 a) Identification of criteria to assess guideline implementation or adherence to recommendations (2');  
41 b) Criteria for assessing impact of implementing the recommendations (2');  
42 c) Advice on the frequency and interval of measurement (1');  
43 d) Descriptions or operational definitions of how the criteria should be measured (1')

44  
45  
46 Related *Report Criteria* from *User's Manual*: • identification of criteria to assess guideline implementation  
47 or adherence to recommendations • criteria for assessing impact of implementing the recommendations •  
48 advice on the frequency and interval of measurement • descriptions or operational definitions of how the  
49 criteria should be measured  
50  
51

52  
53 **Domain 6 Editorial Independence**

54 **Item 22 Funding Body: The views of the funding body have not influenced the content of the  
55 guideline.**

56 Instructions:

57 Information on two aspects should be provided (add 3' for each aspect, 6' in total):  
58  
59



- 1 a) The name of the funding body or source of funding (or explicit statement of no funding, 3');  
2 b) A statement that the funding body did not influence the content of the guideline (3')

3  
4  
5 Related *Report Criteria* from *User's Manual*: • the name of the funding body or source of funding (or  
6 explicit statement of no funding) • a statement that the funding body did not influence the content of the  
7 guideline  
8

9  
10 **Item 23 Competing Interests: Competing interests of guideline development group members have  
11 been recorded and addressed.**

12 Instructions:

13 Information on four aspects should be provided (add corresponding scores for each aspect, 6' in total):

- 14 a) Description of the types of competing interests considered (2');  
15 b) Methods by which potential competing interests were sought (1');  
16 c) Description of the competing interests (1');  
17 d) Description of how the competing interests influenced the guideline process and development of  
18 recommendations (2')

19  
20  
21  
22 Related *Report Criteria* from *User's Manual*: • description of the types of competing interests considered •  
23 methods by which potential competing interests were sought • description of the competing interests •  
24 description of how the competing interests influenced the guideline process and development of  
25 recommendations  
26

27  
28  
29 **Overall Guideline Assessment**

30 **Question 1 Overall quality: Rate the overall quality of this guideline.**

31 Instructions:

32 7' in total. Reviewer's impression on the overall quality of the guideline.  
33  
34

35  
36 **Question 2 Strength of recommendation: I would recommend this guideline for use.**

37 Instructions:

38 Three options to choose from: a) Yes; b) Yes, with modifications; c) No  
39 Reviewer's impression on whether the guideline is easy to be applied to clinical practice.  
40

41  
42 Related *Report Criteria* from *User's Manual*: The overall assessment requires the AGREE II user to make  
43 a judgment as to the quality of the guideline, taking into account the appraisal items considered in the  
44 assessment process.  
45  
46  
47  
48  
49  
50  
51  
52  
53  
54  
55  
56  
57  
58  
59  
60

## References

14. Khanna D, Fitzgerald JD, Khanna PP, Bae S, Singh MK, Neogi T, Pillinger MH, Merrill J, Lee S, Prakash S *et al*: **2012 American College of Rheumatology guidelines for management of gout. Part 1: systematic nonpharmacologic and pharmacologic therapeutic approaches to hyperuricemia.** *Arthritis care & research* 2012, **64**(10):1431-1446.
15. Khanna D, Khanna PP, Fitzgerald JD, Singh MK, Bae S, Neogi T, Pillinger MH, Merrill J, Lee S, Prakash S *et al*: **2012 American college of rheumatology guidelines for management of gout. part 2: Therapy and antiinflammatory prophylaxis of acute gouty arthritis.** *Arthritis Care and Research* 2012, **64**(10):1447-1461.
16. Richette P, Doherty M, Pascual E, Barskova V, Becce F, Castaneda-Sanabria J, Coyfish M, Guillo S, Jansen TL, Janssens H *et al*: **2016 updated EULAR evidence-based recommendations for the management of gout.** *Annals of the rheumatic diseases* 2016.
17. Hamburger M, Baraf HS, Adamson TC, 3rd, Basile J, Bass L, Cole B, Doghramji PP, Guadagnoli GA, Hamburger F, Harford R *et al*: **2011 Recommendations for the diagnosis and management of gout and hyperuricemia.** *Postgraduate medicine* 2011, **123**(6 Suppl 1):3-36.
18. Zhang W, Doherty M, Pascual E, Bardin T, Barskova V, Conaghan P, Gerster J, Jacobs J, Leeb B, Liote F *et al*: **EULAR evidence based recommendations for gout. Part I: Diagnosis. Report of a task force of the Standing Committee for International Clinical Studies Including Therapeutics (ESCISIT).** *Annals of the rheumatic diseases* 2006, **65**(10):1301-1311.
19. Qaseem A, McLean RM, Starkey M, Forciea MA: **Diagnosis of acute gout: a clinical practice guideline from the American College of Physicians.** *Annals of internal medicine* 2017, **166**(1):52-57.
20. Qaseem A, Harris RP, Forciea MA: **Management of acute and recurrent gout: a clinical practice guideline from the American College of Physicians.** *Annals of internal medicine* 2017, **166**(1):58-68.
21. Hui M, Carr A, Cameron S, Davenport G, Doherty M, Forrester H, Jenkins W, Jordan KM, Mallen CD, McDonald TM: **The British Society for Rheumatology guideline for the management of gout.** *Rheumatology* 2017, **56**(7):1056-1059.
22. Multi-disciplinary Expert Task Force on Hyperuricemia and Its Related Diseases. **Chinese multi-disciplinary consensus on the diagnosis and treatment of hyperuricemia and its related diseases.** *Chin J Intern Med.* 2017; **56**(3): 235-248 (Original document in Chinese).
28. Brouwers MC, Kho ME, Browman GP, Burgers JS, Cluzeau F, Feder G, Fervers B, Graham ID, Grimshaw J, Hanna SE: **AGREE II: advancing guideline development, reporting and evaluation in health care.** *Canadian Medical Association Journal* 2010, **182**(18):E839-E842.
36. Sivera F, Andres M, Carmona L, Kydd ASR, Moi J, Seth R, Sriranganathan M, Van Durme C, Van Echteld I, Vinik O *et al*: **Multinational evidence-based recommendations for the diagnosis and management of gout: Integrating systematic literature review and expert opinion of a broad panel of rheumatologists in the 3e initiative.** *Annals of the rheumatic diseases* 2014, **73**(2):328-335.
37. Chinese Society of Endocrinology. **Chinese consensus on the management of hyperuricemia and gout.** *Chin J Endocrinol Metab.* 2013; **29**(11): 913-920 (Original document in Chinese).
38. Association TR: **Taiwan guideline for the management of gout and hyperuricemia - updated 2016.** *Formosan Journal of Rheumatology* 2016, **30**:1-32.
39. Kiltz U, Smolen J, Bardin T, Cohen Solal A, Dalbeth N, Doherty M, Engel B, Flader C, Kay J, Matsuoka M *et al*: **Treat-to-target (T2T) recommendations for gout.** *Annals of the rheumatic diseases* 2016.
40. Araujo F, Cordeiro I, Teixeira F, Rovisco J, Ramiro S, Mourao AF, Costa JA, Pimentao JB, Malcata A, Santos MJ *et al*: **Portuguese recommendations for the diagnosis and management of gout.** *Acta reumatologica portuguesa* 2014, **39**(2):158-171.
41. Chinese Rheumatology Association. **2016 Chinese guideline on the diagnosis and management of**

- 1 **gout.** Chin J Intern Med. 2016; **55**(11): 892-899 (Original document in Chinese).
- 2
- 3 42. Neogi T, Jansen TLTA, Dalbeth N, Fransen J, Schumacher HR, Berendsen D, Brown M, Choi H,
- 4 Edwards NL, Janssens HJEM *et al*: **2015 Gout classification criteria: An American College of**
- 5 **Rheumatology/European League Against Rheumatism collaborative initiative.** *Annals of the*
- 6 *rheumatic diseases* 2015, **74**(10):1789-1798.
- 7
- 8 43. Graf SW, Whittle SL, Wechalekar MD, Moi JHY, Barrett C, Hill CL, Littlejohn G, Lynch N, Major G,
- 9 Taylor AL *et al*: **Australian and New Zealand recommendations for the diagnosis and**
- 10 **management of gout: Integrating systematic literature review and expert opinion in the 3e**
- 11 **Initiative.** *International journal of rheumatic diseases* 2015, **18**(3):341-351.
- 12
- 13 44. Federal Ministry of Health (Nigeria). **National nutritional guideline on non-communicable disease**
- 14 **prevention, control and management.** Accessed at
- 15 <http://www.health.gov.ng/doc/NutritionalGuideline.pdf> on 28 July 2017.
- 16
- 17 45. Manara M, Bortoluzzi A, Favero M, Prevete I, Scire CA, Bianchi G, Borghi C, Cimmino MA, D'Avola
- 18 GM, Desideri G *et al*: **Italian Society of Rheumatology recommendations for the management of**
- 19 **gout.** *Reumatismo* 2013, **65**(1):4-21.
- 20
- 21 46. Spanish Society of Rheumatology (SER). **Clinical practice guidelines for management of gout.**
- 22 Accessed at [https://www.ser.es/wp-content/uploads/2015/09/GuipClinGot\\_1140226\\_EN.pdf](https://www.ser.es/wp-content/uploads/2015/09/GuipClinGot_1140226_EN.pdf) on 28 July
- 23 2017.
- 24
- 25 47. Hu D, Ding R: **The diagnosis and treatment advice of cardiovascular disease combined**
- 26 **asymptomatic hyperuricemia (second edition).** *Chinese Journal of Cardiovascular Research* 2012,
- 27 **10**(4):241-249.
- 28
- 29 48. Yamanaka H: **Japanese guideline for the management of hyperuricemia and gout: second edition.**
- 30 *Nucleosides, nucleotides & nucleic acids* 2011, **30**(12):1018-1029.
- 31
- 32 49. **Ministry of Health Malaysia (MOH). Management of gout.** Accessed at
- 33 <http://www.moh.gov.my/penerbitan/CPG2017/3893.pdf> on 28 July 2017.
- 34
- 35 50. Li-Yu J, Salido E, Manahan S, Lichauco J, Lorenzo J, Torralba K, Raso A, Roberto L, Santos EP,
- 36 Maceda L: **Philippine clinical practice guidelines for the management of gout.** *International journal*
- 37 *of rheumatic diseases* 2008, **11**:A362.
- 38
- 39 51. Meyers OL, Cassim B, Mody GM: **Hyperuricaemia and gout: clinical guideline 2003.** *South African*
- 40 *medical journal = Suid-Afrikaanse tydskrif vir geneeskunde* 2003, **93**(12 Pt 2):961-971.
- 41
- 42 52. The University of Texas at Austin, School of Nursing, Family Nurse Practitioner Program.
- 43 **Management of initial gout in adults.** Accessed at
- 44 <http://www.alabmed.com/uploadfile/2014/0515/20140515070230703.pdf> on 25 July 2017.
- 45
- 46 68. Wuthrich H, Alromaih F, So A: **Guidelines for the treatment of gout: a Swiss perspective.** *Swiss*
- 47 *medical weekly* 2016, **146**:w14341.
- 48
- 49 69. Ceriotti F, Fernandez-Calle P, Klee GG, Nordin G, Sandberg S, Streichert T, Vives-Corrons JL,
- 50 Panteghini M: **Criteria for assigning laboratory measurands to models for analytical performance**
- 51 **specifications defined in the 1st EFLM Strategic Conference.** *Clinical chemistry and laboratory*
- 52 *medicine* 2016.
- 53
- 54 70. Liote F: **New therapeutic approach to hyperuricemia and gout in the light of recommendations.**
- 55 *Joint, bone, spine : revue du rhumatisme* 2016, **83**(4):376-380.
- 56
- 57 71. de Lautour H, Taylor WJ, Adebajo A, Alten R, Burgos-Vargas R, Chapman P, Cimmino MA, da Rocha
- 58 Castelar Pinheiro G, Day R, Harrold LR *et al*: **Development of Preliminary Remission Criteria for**
- 59 **Gout Using Delphi and 1000Minds Consensus Exercises.** *Arthritis care & research* 2016,
- 60 **68**(5):667-672.
72. De Lautour H, Dalbeth N, Taylor W: **Development of preliminary remission criteria for gout using**
- Delphi and 1000 minds consensus exercises.** *Arthritis and Rheumatology* 2014, **66**:S68.

- 1  
2  
3  
4  
5  
6  
7  
8  
9  
10  
11  
12  
13  
14  
15  
16  
17  
18  
19  
20  
21  
22  
23  
24  
25  
26  
27  
28  
29  
30  
31  
32  
33  
34  
35  
36  
37  
38  
39  
40  
41  
42  
43  
44  
45  
46  
47  
48  
49  
50  
51  
52  
53  
54  
55  
56  
57  
58  
59  
60
73. Dalbeth N, Winnard D, Gow PJ, Boswell DR, Te Karu L, Lindsay K, Arroll B, Stamp LK: **Urate testing in gout: why, when and how.** *The New Zealand medical journal* 2015, **128**(1420):65-68.
74. Terslev L, Gutierrez M, Schmidt WA, Keen HI, Filippucci E, Kane D, Thiele R, Kaeley G, Balint P, Mandl P *et al*: **Ultrasound as an Outcome Measure in Gout. A Validation Process by the OMERACT Ultrasound Working Group.** *The Journal of rheumatology* 2015, **42**(11):2177-2181.
75. Turk C, Petrik A, Sarica K, Seitz C, Skolarikos A, Straub M, Knoll T: **EAU Guidelines on Diagnosis and Conservative Management of Urolithiasis.** *European urology* 2016, **69**(3):468-474.
76. Stewart Coats AJ, Shewan LG: **Consensus Meeting on "Uric Acid and Cardiovascular Risk" held at University Magna Graecia, Catanzaro, Italy, May 2014. Publication of the Proceedings as a special issue in the International Journal of Cardiology.** *International journal of cardiology* 2016, **213**:1-3.
77. Sullivan PM, William A, Tichy EM: **Hyperuricemia and gout in solid-organ transplant: update in pharmacological management.** *Progress in transplantation (Aliso Viejo, Calif)* 2015, **25**(3):263-270.
78. Gutierrez M, Schmidt WA, Thiele RG, Keen HI, Kaeley GS, Naredo E, Iagnocco A, Bruyn GA, Balint PV, Filippucci E *et al*: **International Consensus for ultrasound lesions in gout: results of Delphi process and web-reliability exercise.** *Rheumatology (Oxford, England)* 2015, **54**(10):1797-1805.
79. Grainger R, Dalbeth N, Keen H, Durcan L, Lawrence Edwards N, Perez-Ruiz F, Diaz-Torne C, Singh JA, Khanna D, Simon LS *et al*: **Imaging as an Outcome Measure in Gout Studies: Report from the OMERACT Gout Working Group.** *The Journal of rheumatology* 2015, **42**(12):2460-2464.
80. Robinson PC, Dalbeth N: **Advances in pharmacotherapy for the treatment of gout.** *Expert opinion on pharmacotherapy* 2015, **16**(4):533-546.
81. Chaudhary K, Malhotra K, Sowers J, Aroor A: **Uric Acid - key ingredient in the recipe for cardiorenal metabolic syndrome.** *Cardiorenal medicine* 2013, **3**(3):208-220.
82. Bakris GL, Doghramji PP, Keenan RT, Silber SH: **CaseBook challenges: Managing gout, hyperuricemia and comorbidities -- dialogue with the experts.** *The American journal of medicine* 2014, **127**(1):S1.
83. Terkeltaub R: **Gout: multinational gout guidelines: how do we move beyond 'deja vu'?** *Nature reviews Rheumatology* 2013, **9**(10):567-569.
84. Lyseng-Williamson KA: **Canakinumab: a guide to its use in acute gouty arthritis flares.** *BioDrugs : clinical immunotherapeutics, biopharmaceuticals and gene therapy* 2013, **27**(4):401-406.
85. Deodhar A: **Update in rheumatology: evidence published in 2012.** *Annals of internal medicine* 2013, **158**(12):903-906.
86. Simao AN, Lozovoy MA, Dichi I: **The uric acid metabolism pathway as a therapeutic target in hyperuricemia related to metabolic syndrome.** *Expert opinion on therapeutic targets* 2012, **16**(12):1175-1187.
87. Stamp LK, Jordan S: **The challenges of gout management in the elderly.** *Drugs & aging* 2011, **28**(8):591-603.
88. Jansen TL, Richette P, Perez-Ruiz F, Tausche AK, Guerne PA, Punzi L, Leeb B, Barskova V, Uhlig T, Pimentao J *et al*: **International position paper on febuxostat.** *Clinical rheumatology* 2010, **29**(8):835-840.
89. Grainger R, Taylor WJ, Dalbeth N, Perez-Ruiz F, Singh JA, Waltrip RW, Schlesinger N, Evans R, Edwards NL, Sivera F *et al*: **Progress in measurement instruments for acute and chronic gout studies.** *The Journal of rheumatology* 2009, **36**(10):2346-2355.
90. Grainger R, Taylor WJ: **Establishing outcome domains for evaluating treatment of acute and chronic gout.** *Current opinion in rheumatology* 2008, **20**(2):173-178.
91. Dalbeth N, Stamp L: **Allopurinol dosing in renal impairment: walking the tightrope between adequate urate lowering and adverse events.** *Seminars in dialysis* 2007, **20**(5):391-395.

- 1  
2  
3  
4  
5  
6  
7  
8  
9  
10  
11  
12  
13  
14  
15  
16  
17  
18  
19  
20  
21  
22  
23  
24  
25  
26  
27  
28  
29  
30  
31  
32  
33  
34  
35  
36  
37  
38  
39  
40  
41  
42  
43  
44  
45  
46  
47  
48  
49  
50  
51  
52  
53  
54  
55  
56  
57  
58  
59  
60
92. Jordan KM, Cameron JS, Snaith M, Zhang W, Doherty M, Seckl J, Hingorani A, Jaques R, Nuki G: **British Society for Rheumatology and British Health Professionals in Rheumatology guideline for the management of gout.** *Rheumatology (Oxford, England)* 2007, **46**(8):1372-1374.
93. Becker G: **The CARI guidelines. Kidney stones: uric acid stones.** *Nephrology (Carlton, Vic)* 2007, **12 Suppl 1**:S21-25.
94. Caramia G, Di Gregorio L, Tarantino ML, Galuffo A, Iacolino R, Caramia M: **Uric acid, phosphate and oxalate stones: treatment and prophylaxis.** *Urologia internationalis* 2004, **72 Suppl 1**:24-28.
95. Terkeltaub RA: **Clinical practice. Gout.** *The New England journal of medicine* 2003, **349**(17):1647-1655.
96. Cleland LG, Hill CL, James MJ: **Diet and arthritis.** *Bailliere's clinical rheumatology* 1995, **9**(4):771-785.
97. Hande KR, Noone RM, Stone WJ: **Severe allopurinol toxicity. Description and guidelines for prevention in patients with renal insufficiency.** *The American journal of medicine* 1984, **76**(1):47-56.
98. **Committee on the Review of Medicines. Recommendations on phenylbutazone, oxyphenbutazone, feprazone, allopurinol, colchicine, probenecid, and sulphinyprazone.** *British medical journal* 1978, **1**(6125):1466-1467.
99. Mourgues C, Soubrier M, Pereira B, Vorilhon P, Mathieu S: **2012 American guidelines for the management of gout as seen by family doctors in France.** *Annals of the rheumatic diseases* 2016, **75**:1187.
100. Bakris GL, Doghramji PP, Keenan RT, Silber SH: **CaseBook Challenges: Managing Gout, Hyperuricemia and Comorbidities-Dialogue with the Experts.** *American Journal of Medicine* 1970, **127**(1):S1.
101. Pai S, Raslan A, Schlesinger N: **Gout: Update on Current Therapeutics.** *Current Treatment Options in Rheumatology* 2015, **1**(2):131-142.
102. Vargas-Santos AB, Taylor WJ, Neogi T: **Gout Classification Criteria: Update and Implications.** *Current rheumatology reports* 2016, **18** (7) (no pagination)(46).
103. Filiopoulos V, Hadjiyannakos D, Vlassopoulos D: **Febuxostat renoprotection in CKD patients with asymptomatic hyperuricemia.** *American Journal of Kidney Diseases* 2016, **67**(6):989-990.
104. Chinchilla SP, Urionaguena I, Perez-Ruiz F: **Febuxostat for the chronic management of hyperuricemia in patients with gout.** *Expert Review of Clinical Pharmacology* 2016, **9**(5):665-673.
105. Rimler E, Lom J, Higdon J, Cosco D, Jones D: **A primary care perspective on gout.** *Open Urology and Nephrology Journal* 2016, **9**(Suppl 1: M5):27-34.
106. Saito Y, Stamp LK, Caudle KE, Hershfield MS, McDonagh EM, Callaghan JT, Tassaneeyakul W, Mushiroda T, Kamatani N, Goldspiel BR *et al*: **CPIC: Clinical Pharmacogenetics Implementation Consortium of the Pharmacogenomics Research Network.** *Clinical pharmacology and therapeutics* 2016, **99**(1):36-37.
107. Mody GM: **Update on hyperuricaemia and gout with evidence based management guidelines.** *South African Family Practice* 2015, **57**(4):267-272.
108. Richette P, Pascual E, Doherty M, Barskova V, Becce F, Coyfish M, Janssens H, Jansen T, Liote F, Mallen C *et al*: **Updated EULAR evidence-based recommendations for the diagnosis of gout.** *Annals of the Rheumatic Diseases Conference: Annual European Congress of Rheumatology of the European League Against Rheumatism, EULAR* 2014, **73**(no pagination).
109. Richette P, Doherty M, Pascual E, Barskova V, Becce F, Coyfish M, Janssens H, Jansen T, Liote F, Mallen C *et al*: **Updated EULAR evidence-based recommendations for the management of gout.** *Annals of the Rheumatic Diseases Conference: Annual European Congress of Rheumatology of the European League Against Rheumatism, EULAR* 2014, **73**(no pagination).
110. Gutierrez M, Smith W, Thiele R, Keen H, Kaeley G, Naredo E, Iagnocco A, Bruyn G, Balint P,

- Filippucci E *et al*: **Defining elementary ultrasound lesions in gout. Preliminary results of delphi consensus and web-exercise reliability.** *Annals of the Rheumatic Diseases Conference: Annual European Congress of Rheumatology of the European League Against Rheumatism, EULAR 2014*, **73**(no pagination).
111. Furst DE, Keystone EC, So AK, Braun J, Breedveld FC, Burmester GR, De Benedetti F, Dörner T, Emery P, Fleischmann R *et al*: **Updated consensus statement on biological agents for the treatment of rheumatic diseases, 2012.** *Annals of the rheumatic diseases* 2013, **72**(SUPPL. 2):ii2-ii34.
112. Hershfield MS, Callaghan JT, Tassaneeyakul W, Mushiroda T, Thorn CF, Klein TE, Lee MTM: **Clinical pharmacogenetics implementation consortium guidelines for human leukocyte antigen-b genotype and allopurinol dosing.** *Clinical pharmacology and therapeutics* 2013, **93**(2):153-158.
113. Andres M, Sivera F, Kydd A, Moi J, Seth R, Sriranganathan MK, Van Durme C, Van Echteld IAAM, Vinik O, Wechalekar MD *et al*: **Multinational evidence-based recommendations for diagnosis and management of gout: Integrating systematic literature research and expert opinion of a broad panel of rheumatologists in the 3E initiative.** *Arthritis and rheumatism* 2012, **64**:S810.
114. Stevenson M, Pandor A: **Febuxostat for the management of hyperuricaemia in patients with gout: A nice single technology appraisal.** *PharmacoEconomics* 2011, **29**(2):133-140.
115. Diaz-Borjon A: **Guidelines for the use of conventional and newer disease-modifying antirheumatic drugs in elderly patients with rheumatoid arthritis.** *Drugs and Aging* 2009, **26**(4):273-293.
116. Furst DE, Keystone EC, Fleischmann R, Mease P, Breedveld FC, Smolen JS, Kalden JR, Braun J, Bresnihan B, Burmester GR *et al*: **Updated consensus statement on biological agents for the treatment of rheumatic diseases, 2009.** *Annals of the rheumatic diseases* 2010, **69**(SUPPL. 1):i2-i29.
117. Taylor WJ, Shewchuk R, Saag KG, Schumacher Jr HR, Singh JA, Grainger R, Edwards NL, Bardin T, Waltrip RW, Simon LS *et al*: **Toward a Valid Definition of Gout Flare: Results of Consensus Exercises Using Delphi Methodology and Cognitive Mapping.** *Arthritis Care and Research* 2009, **61**(4):535-543.
118. Taylor WJ, Schumacher Jr HR, Baraf HSB, Chapman P, Stamp L, Doherty M, McQueen F, Dalbeth N, Schlesinger N, Furst DE *et al*: **A modified Delphi exercise to determine the extent of consensus with OMERACT outcome domains for studies of acute and chronic gout.** *Annals of the rheumatic diseases* 2008, **67**(6):888-891.
119. Bussieres AE, Peterson C, Taylor JAM: **Diagnostic Imaging Guideline for Musculoskeletal Complaints in Adults-An Evidence-Based Approach-Part 2: Upper Extremity Disorders.** *Journal of Manipulative and Physiological Therapeutics* 2008, **31**(1):2-32.
120. Brooks P, Boers M, Simon LS, Strand V, Tugwell P: **Outcome measures in rheumatoid arthritis: The OMERACT process.** *Expert Review of Clinical Immunology* 2007, **3**(3):271-275.
121. Bestermann W, Houston MC, Basile J, Egan B, Ferrario CM, Lackland D, Hawkins RG, Reed J, Rogers P, Wise D *et al*: **Addressing the global cardiovascular risk of hypertension, dyslipidemia, diabetes mellitus, and the metabolic syndrome in the Southeastern United States, part II: Treatment recommendations for management of the global cardiovascular risk of hypertension, dyslipidemia, diabetes mellitus, and the metabolic syndrome.** *American Journal of the Medical Sciences* 2005, **329**(6):292-305.
122. Schumacher Jr HR: **Management strategies for osteoarthritis, ankylosing spondylitis, and gouty arthritis.** *Journal of Clinical Rheumatology* 2004, **10**(3 SUPPL.):S18-S25.
123. Bartlett JG: **Guidelines section.** *Infectious Diseases in Clinical Practice* 2002, **11**(8):467-471.
124. Furst DE, Keystone EC, So AK, Braun J, Breedveld FC, Burmester GR, De Benedetti F, Dörner T, Emery P, Fleischmann R: **Updated consensus statement on biological agents for the treatment of rheumatic diseases, 2012.** *Annals of the rheumatic diseases* 2013, **72**(suppl 2):ii2-ii34.
125. Newberry SJ, FitzGerald JD, Motala A, Booth M, Maglione MA, Han D, Tariq A, O'hanlon CE,

- 1 Shanman R, Dudley W: **Diagnosis of gout: a systematic review in support of an American College**  
2 **of Physicians clinical practice guideline.** *Annals of internal medicine* 2017, **166**(1):27-36.
- 3  
4 126. Shekelle PG, Newberry SJ, FitzGerald JD, Motala A, O'hanlon CE, Tariq A, Okunogbe A, Han D,  
5 Shanman R: **Management of gout: a systematic review in support of an American College of**  
6 **Physicians clinical practice guideline.** *Annals of internal medicine* 2017, **166**(1):37-51.
- 7  
8 127. Sandberg S, Fraser CG, Horvath AR, Jansen R, Jones G, Oosterhuis W, Petersen PH, Schimmel H,  
9 Sikaris K, Panteghini M: **Defining analytical performance specifications: consensus statement**  
10 **from the 1st Strategic Conference of the European Federation of Clinical Chemistry and**  
11 **Laboratory Medicine.** *Clinical Chemistry and Laboratory Medicine (CCLM)* 2015, **53**(6):833-835.
- 12  
13 128. Kallinich T, Haffner D, Niehues T, Huss K, Lainka E, Neudorf U, Schaefer C, Stojanov S, Timmann C,  
14 Keitzer R: **Colchicine use in children and adolescents with familial Mediterranean fever:**  
15 **literature review and consensus statement.** *Pediatrics* 2007, **119**(2):e474-e483.
- 16  
17 129. Preminger GM, Tiselius H-G, Assimos DG, Alken P, Buck C, Gallucci M, Knoll T, Lingeman JE,  
18 Nakada SY, Pearle MS: **2007 guideline for the management of ureteral calculi.** *The Journal of*  
19 *urology* 2007, **178**(6):2418-2434.
- 20  
21 130. National Institute for Health and Care Excellence (NICE). **Febuxostat for the management of**  
22 **hyperuricaemia in people with gout.** Assessed at nice.org.uk/guidance/ta164 on 25 July 2017.
- 23  
24 131. Phoon, R and Johnson, D. **Medical therapies to reduce chronic kidney disease progression and**  
25 **cardiovascular risk: uric acid-lowering agents.** Accessed at  
26 [http://www.cari.org.au/CKD/CKD%20early/Medical\\_Th\\_Uric\\_Acid-lowering.pdf](http://www.cari.org.au/CKD/CKD%20early/Medical_Th_Uric_Acid-lowering.pdf) on 23 July 2017.
- 27  
28 132. Li Q, Yu P: **The diagnosis and treatment of gout.** *Int J Endocrinol Metab* 2011, **31**(5):289-291.
- 29  
30 133. zhang X, Zhang Z: **Advice for the diagnosis and treatment for gout.** *Chin J Rheumatol* 2013,  
31 **17**(8):631.
- 32  
33 134. Deng X, Zhang Z: **OMERACT Ultrasound Gout Task Force group released the international**  
34 **consensus for ultrasound lesions in gout.** *Chin J Rheumatol* 2016, **20**(3):216.
- 35  
36 135. Chinese Rheumatology Association (CRA). **Guideline for the diagnosis and tretment for primary**  
37 **gout (draft).** *Chin J Rheumatol.* 2004;8(3): 178-181 (Original document in Chinese).
- 38  
39 136. Chinese College of Cardiovascular Physicians (CCCP). **The diagnosis and treatment advice of**  
40 **cardiovascular disease combined asymptomatic hyperuricemia (second edition).** Accessed at  
41 <http://www.alabmed.com/uploadfile/2014/0121/20140121022919976.pdf> on 20 July 2017 (Original  
42 document in Chinese).
- 43  
44 137. Chinese Rheumatology Association (CRA). **Guideline for the diagnosis and tretment for primary**  
45 **gout (draft).** *Chin J Rheumatol.* 2011;15(6): 410-413 (Original document in Chinese).
- 46  
47 138. World Health Organization (WHO). **Standard treatment guidelines and essential drugs list for**  
48 **South Africa.** Accessed at <http://apps.who.int/medicinedocs/documents/s18259en/s18259en.pdf> on 23  
49 July 2017.
- 50  
51 139. European Medicines Agency (EMA). **Concept paper on the need of the guideline on clinical**  
52 **investigation of medicinal products for the treatment of gout.** Accessed at  
53 [http://www.ema.europa.eu/docs/en\\_GB/document\\_library/Scientific\\_guideline/2012/06/WC500128670](http://www.ema.europa.eu/docs/en_GB/document_library/Scientific_guideline/2012/06/WC500128670.pdf)  
54 [.pdf](http://www.ema.europa.eu/docs/en_GB/document_library/Scientific_guideline/2012/06/WC500128670.pdf) on 23 July 2017.
- 55  
56 140. Agency for Healthcare Research and Quality (AHRQ). **Diagnosis and Management of Gout:**  
57 **Current State of the Evidence.** Accessed at  
58 [https://effectivehealthcare.ahrq.gov/sites/default/files/pdf/gout\\_clinician.pdf](https://effectivehealthcare.ahrq.gov/sites/default/files/pdf/gout_clinician.pdf) on 25 July 2017.
- 59  
60 141. Agency for Healthcare Research and Quality (AHRQ). **Diagnosis of Gout.** Accessed at  
[https://effectivehealthcare.ahrq.gov/sites/default/files/pdf/gout\\_research-2016.pdf](https://effectivehealthcare.ahrq.gov/sites/default/files/pdf/gout_research-2016.pdf) on 25 July 2017.
142. National Institute for Health and Care Excellence (NICE). **Pegloticase for treating severe debilitating**  
**chronic tophaceous gout.** Assessed at nice.org.uk/guidance/ta291 on 25 July 2017.

- 1  
2  
3  
4  
5  
6  
7  
8  
9  
10  
11  
12  
13  
14  
15  
16  
17  
18  
19  
20  
21  
22  
23  
24  
25  
26  
27  
28  
29  
30  
31  
32  
33  
34  
35  
36  
37  
38  
39  
40  
41  
42  
43  
44  
45  
46  
47  
48  
49  
50  
51  
52  
53  
54  
55  
56  
57  
58  
59  
60
143. Agency for Healthcare Research and Quality (AHRQ). **Diagnosis of gout**. Assessed at [www.effectivehealthcare.ahrq.gov/reports/fnal.cfm](http://www.effectivehealthcare.ahrq.gov/reports/fnal.cfm) on 25 July 2017.
144. Buckinghamshire Formulary, National Health Service (NHS). **781FM.1 Febuxostat**. Accessed at [http://www.bucksformulary.nhs.uk/docs/Guideline\\_781FM.pdf](http://www.bucksformulary.nhs.uk/docs/Guideline_781FM.pdf) on 25 July 2017.
145. Canadian Expert Drug Advisory Committee (CEDAC). **Febuxostat**. Accessed at [https://www.cadth.ca/media/cdr/complete/cdr\\_complete\\_Uloric\\_April-29-11.pdf](https://www.cadth.ca/media/cdr/complete/cdr_complete_Uloric_April-29-11.pdf) on 25 July 2017.
146. Dalhousie CME Academic Detailing Service. **Gout: Update 2013**. Accessed at [https://cdn.dal.ca/content/dam/dalhousie/pdf/faculty/medicine/departments/core-units/cpd/academic-detailing/Gout\\_workbook.pdf](https://cdn.dal.ca/content/dam/dalhousie/pdf/faculty/medicine/departments/core-units/cpd/academic-detailing/Gout_workbook.pdf) on 23 July 2017.
147. Lancashire Medicines Management Group, National Health Service (NHS). **Gout Management Summary Guidelines (Version 1.1)**. Accessed at [http://www.lancsmmg.nhs.uk/download/guidelines/Gout%20Prescribing%20Guidance%20\(Versio%201.1\).pdf](http://www.lancsmmg.nhs.uk/download/guidelines/Gout%20Prescribing%20Guidance%20(Versio%201.1).pdf) on 25 July 2017.



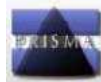

# PRISMA 2009 Checklist

| Section/topic                      | #  | Checklist item                                                                                                                                                                                                                                                                                              | Reported on page # |
|------------------------------------|----|-------------------------------------------------------------------------------------------------------------------------------------------------------------------------------------------------------------------------------------------------------------------------------------------------------------|--------------------|
| <b>TITLE</b>                       |    |                                                                                                                                                                                                                                                                                                             |                    |
| Title                              | 1  | Identify the report as a systematic review, meta-analysis, or both.                                                                                                                                                                                                                                         | 1                  |
| <b>ABSTRACT</b>                    |    |                                                                                                                                                                                                                                                                                                             |                    |
| Structured summary                 | 2  | Provide a structured summary including, as applicable: background; objectives; data sources; study eligibility criteria, participants, and interventions; study appraisal and synthesis methods; results; limitations; conclusions and implications of key findings; systematic review registration number. | 3-4                |
| <b>INTRODUCTION</b>                |    |                                                                                                                                                                                                                                                                                                             |                    |
| Rationale                          | 3  | Describe the rationale for the review in the context of what is already known.                                                                                                                                                                                                                              | 6-7                |
| Objectives                         | 4  | Provide an explicit statement of questions being addressed with reference to participants, interventions, comparisons, outcomes, and study design (PICOS).                                                                                                                                                  | 7                  |
| <b>METHODS</b>                     |    |                                                                                                                                                                                                                                                                                                             |                    |
| Protocol and registration          | 5  | Indicate if a review protocol exists, if and where it can be accessed (e.g., Web address), and, if available, provide registration information including registration number.                                                                                                                               | 7                  |
| Eligibility criteria               | 6  | Specify study characteristics (e.g., PICOS, length of follow-up) and report characteristics (e.g., years considered, language, publication status) used as criteria for eligibility, giving rationale.                                                                                                      | 8                  |
| Information sources                | 7  | Describe all information sources (e.g., databases with dates of coverage, contact with study authors to identify additional studies) in the search and date last searched.                                                                                                                                  | 7                  |
| Search                             | 8  | Present full electronic search strategy for at least one database, including any limits used, such that it could be repeated.                                                                                                                                                                               | 7                  |
| Study selection                    | 9  | State the process for selecting studies (i.e., screening, eligibility, included in systematic review, and, if applicable, included in the meta-analysis).                                                                                                                                                   | 8                  |
| Data collection process            | 10 | Describe method of data extraction from reports (e.g., piloted forms, independently, in duplicate) and any processes for obtaining and confirming data from investigators.                                                                                                                                  | 8                  |
| Data items                         | 11 | List and define all variables for which data were sought (e.g., PICOS, funding sources) and any assumptions and simplifications made.                                                                                                                                                                       | 8                  |
| Risk of bias in individual studies | 12 | Describe methods used for assessing risk of bias of individual studies (including specification of whether this was done at the study or outcome level), and how this information is to be used in any data synthesis.                                                                                      | 8-9                |
| Summary measures                   | 13 | State the principal summary measures (e.g., risk ratio, difference in means).                                                                                                                                                                                                                               | 8-9                |
| Synthesis of results               | 14 | Describe the methods of handling data and combining results of studies, if done, including measures of consistency (e.g., $I^2$ ) for each meta-analysis.                                                                                                                                                   | 8-9                |

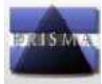

# PRISMA 2009 Checklist

Page 1 of 2

| Section/topic                 | #  | Checklist item                                                                                                                                                                                           | Reported -on page # |
|-------------------------------|----|----------------------------------------------------------------------------------------------------------------------------------------------------------------------------------------------------------|---------------------|
| Risk of bias across studies   | 15 | Specify any assessment of risk of bias that may affect the cumulative evidence (e.g., publication bias, selective reporting within studies).                                                             | 8-9                 |
| Additional analyses           | 16 | Describe methods of additional analyses (e.g., sensitivity or subgroup analyses, meta-regression), if done, indicating which were pre-specified.                                                         | 8-9                 |
| <b>RESULTS</b>                |    |                                                                                                                                                                                                          |                     |
| Study selection               | 17 | Give numbers of studies screened, assessed for eligibility, and included in the review, with reasons for exclusions at each stage, ideally with a flow diagram.                                          | 9                   |
| Study characteristics         | 18 | For each study, present characteristics for which data were extracted (e.g., study size, PICOS, follow-up period) and provide the citations.                                                             | 10                  |
| Risk of bias within studies   | 19 | Present data on risk of bias of each study and, if available, any outcome level assessment (see item 12).                                                                                                | 10-12               |
| Results of individual studies | 20 | For all outcomes considered (benefits or harms), present, for each study: (a) simple summary data for each intervention group (b) effect estimates and confidence intervals, ideally with a forest plot. | 12-16               |
| Synthesis of results          | 21 | Present results of each meta-analysis done, including confidence intervals and measures of consistency.                                                                                                  | 12-16               |
| Risk of bias across studies   | 22 | Present results of any assessment of risk of bias across studies (see Item 15).                                                                                                                          | 12                  |
| Additional analysis           | 23 | Give results of additional analyses, if done (e.g., sensitivity or subgroup analyses, meta-regression [see Item 16]).                                                                                    | 11                  |
| <b>DISCUSSION</b>             |    |                                                                                                                                                                                                          |                     |
| Summary of evidence           | 24 | Summarize the main findings including the strength of evidence for each main outcome; consider their relevance to key groups (e.g., healthcare providers, users, and policy makers).                     | 16                  |
| Limitations                   | 25 | Discuss limitations at study and outcome level (e.g., risk of bias), and at review-level (e.g., incomplete retrieval of identified research, reporting bias).                                            | 19-20               |
| Conclusions                   | 26 | Provide a general interpretation of the results in the context of other evidence, and implications for future research.                                                                                  | 20-21               |
| <b>FUNDING</b>                |    |                                                                                                                                                                                                          |                     |
| Funding                       | 27 | Describe sources of funding for the systematic review and other support (e.g., supply of data); role of funders for the systematic review.                                                               | 21-22               |

From: Moher D, Liberati A, Tetzlaff J, Altman DG, The PRISMA Group (2009). Preferred Reporting Items for Systematic Reviews and Meta-Analyses: The PRISMA Statement. PLoS Med 6(7): e1000097. doi:10.1371/journal.pmed1000097

For more information, visit: [www.prisma-statement.org](http://www.prisma-statement.org).

# BMJ Open

## Diagnosis and treatment for hyperuricemia and gout: a systematic review of clinical practice guidelines and consensus statements

|                                 |                                                                                                                                                                                                                                                                                                                                                                                                                                                                                                                                                                                                                                                                                                                                                                                                                                                                                                                                                                                                                                                                                                                                                                                                                                                                                                                                                                                                                                                                                                                                                                   |
|---------------------------------|-------------------------------------------------------------------------------------------------------------------------------------------------------------------------------------------------------------------------------------------------------------------------------------------------------------------------------------------------------------------------------------------------------------------------------------------------------------------------------------------------------------------------------------------------------------------------------------------------------------------------------------------------------------------------------------------------------------------------------------------------------------------------------------------------------------------------------------------------------------------------------------------------------------------------------------------------------------------------------------------------------------------------------------------------------------------------------------------------------------------------------------------------------------------------------------------------------------------------------------------------------------------------------------------------------------------------------------------------------------------------------------------------------------------------------------------------------------------------------------------------------------------------------------------------------------------|
| Journal:                        | <i>BMJ Open</i>                                                                                                                                                                                                                                                                                                                                                                                                                                                                                                                                                                                                                                                                                                                                                                                                                                                                                                                                                                                                                                                                                                                                                                                                                                                                                                                                                                                                                                                                                                                                                   |
| Manuscript ID                   | bmjopen-2018-026677.R1                                                                                                                                                                                                                                                                                                                                                                                                                                                                                                                                                                                                                                                                                                                                                                                                                                                                                                                                                                                                                                                                                                                                                                                                                                                                                                                                                                                                                                                                                                                                            |
| Article Type:                   | Research                                                                                                                                                                                                                                                                                                                                                                                                                                                                                                                                                                                                                                                                                                                                                                                                                                                                                                                                                                                                                                                                                                                                                                                                                                                                                                                                                                                                                                                                                                                                                          |
| Date Submitted by the Author:   | 06-Feb-2019                                                                                                                                                                                                                                                                                                                                                                                                                                                                                                                                                                                                                                                                                                                                                                                                                                                                                                                                                                                                                                                                                                                                                                                                                                                                                                                                                                                                                                                                                                                                                       |
| Complete List of Authors:       | <p>Li, Qianrui; Sichuan University West China Hospital, Department of Endocrinology and Metabolism</p> <p>Li, Xiaodan; Sichuan University West China Hospital, Department of Gastroenterology</p> <p>Wang, Jing; Sichuan University West China Hospital, Department of Oto-Rhino-Laryngology</p> <p>Liu, Hongdie; Sichuan University West China Hospital, Department of Endocrinology and Metabolism</p> <p>Kwong, Joey; Prince of Wales Hospital, The Chinese University of Hong Kong, Jockey Club School of Public Health and Primary Care</p> <p>Chen, Hao; Nanjing University of Chinese Medicine, The second clinical college</p> <p>Li, Ling; West China Hospital, Sichuan University, Chinese Evidence-based Medicine Center</p> <p>Chung, Sheng-Chia; The Farr Institute of Health Informatics Research and Institute of Health Informatics, University College London</p> <p>Shah, Anoop; University College London, Farr Institute of Health Informatics Research</p> <p>Chen, Yaolong; School of Basic Medical Sciences, Lanzhou University, Evidence-Based Medicine Center</p> <p>An, Zhenmei; Sichuan University West China Hospital, Department of Endocrinology and Metabolism</p> <p>Sun, Xin; West China Hospital, Sichuan University, Chinese Evidence-based Medicine Center</p> <p>Hemingway, Harry; UCL, Epidemiology and Public Health</p> <p>Tian, Hao-Ming; Department of Endocrinology, West China Hospital, Sichuan University</p> <p>Li, Sheyu; Department of Endocrinology and Metabolism, West China Hospital, Sichuan University</p> |
| <b>Primary Subject Heading</b>: | Diabetes and endocrinology                                                                                                                                                                                                                                                                                                                                                                                                                                                                                                                                                                                                                                                                                                                                                                                                                                                                                                                                                                                                                                                                                                                                                                                                                                                                                                                                                                                                                                                                                                                                        |
| Secondary Subject Heading:      | Diabetes and endocrinology                                                                                                                                                                                                                                                                                                                                                                                                                                                                                                                                                                                                                                                                                                                                                                                                                                                                                                                                                                                                                                                                                                                                                                                                                                                                                                                                                                                                                                                                                                                                        |
| Keywords:                       | Clinical practice guideline, Hyperuricemia, Gout, Systematic review                                                                                                                                                                                                                                                                                                                                                                                                                                                                                                                                                                                                                                                                                                                                                                                                                                                                                                                                                                                                                                                                                                                                                                                                                                                                                                                                                                                                                                                                                               |
|                                 |                                                                                                                                                                                                                                                                                                                                                                                                                                                                                                                                                                                                                                                                                                                                                                                                                                                                                                                                                                                                                                                                                                                                                                                                                                                                                                                                                                                                                                                                                                                                                                   |

1  
2  
3  
4  
5  
6  
7  
8  
9  
10  
11  
12  
13  
14  
15  
16  
17  
18  
19  
20  
21  
22  
23  
24  
25  
26  
27  
28  
29  
30  
31  
32  
33  
34  
35  
36  
37  
38  
39  
40  
41  
42  
43  
44  
45  
46  
47  
48  
49  
50  
51  
52  
53  
54  
55  
56  
57  
58  
59  
60

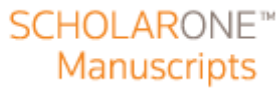

1  
2  
3  
4 **Diagnosis and treatment for hyperuricemia and gout: a systematic**  
5 **review of clinical practice guidelines and consensus statements**  
6  
7  
8

9 **Running title:** AGREE II assessment for hyperuricemia and gout guidelines  
10  
11

12  
13 Qianrui Li<sup>1,2#</sup>, Xiaodan Li<sup>3#</sup>, Jing Wang<sup>4</sup>, Hongdie Liu<sup>1</sup>, Joey Sum-Wing  
14 Kwong<sup>5</sup>, Hao Chen<sup>6</sup>, Ling Li<sup>7</sup>, Sheng-Chia Chung<sup>2</sup>, Anoop Dinesh Shah<sup>2,8,9,10</sup>,  
15 Yaolong Chen<sup>11</sup>, Zhenmei An<sup>1</sup>, Xin Sun<sup>7</sup>, Harry Hemingway<sup>2,9,10</sup>, Haoming  
16 Tian<sup>1\*</sup>, Sheyu Li<sup>1,12\*</sup>  
17  
18  
19  
20  
21  
22

23 1 Department of Endocrinology and Metabolism, West China Hospital,  
24 Sichuan University, Chengdu, 610041, China  
25

26 2 Institute of Health Informatics, University College London, 222 Euston Road,  
27 London NW1 2DA  
28

29 3 Department of Gastroenterology, West China Hospital, Sichuan University,  
30 Chengdu, 610041, China  
31

32 4 Department of Oto-Rhino-Laryngology, West China Hospital, Sichuan  
33 University, Chengdu, 610041, China  
34

35 5 Jockey Club School of Public Health and Primary Care, Prince of Wales  
36 Hospital, The Chinese University of Hong Kong, Hong Kong, China  
37

38 6 The Second Clinical College, Nanjing University of Chinese Medicine,  
39 Nanjing, 210046, China  
40

41 7 Chinese Evidence-based Medicine Center, West China Hospital, Sichuan  
42 University, Chengdu, 610041, China  
43

44 8 University College London Hospitals NHS Trust, London, United Kingdom  
45

46 9 Health Data Research UK London, University College London, 222 Euston  
47 Road, London NW1 2DA, United Kingdom  
48

49 10 The National Institute for Health Research University College London  
50 Hospitals Biomedical Research Centre, University College London, 222  
51 Euston Road, London NW1 2DA, UK  
52  
53  
54  
55  
56  
57  
58  
59  
60

1  
2  
3  
4 11 Evidence-Based Medicine Center, School of Basic Medical Sciences,  
5  
6 Lanzhou University, Lanzhou, China

7  
8 12 Division of Population Health and Genomics, Ninewells Hospital and  
9  
10 School of Medicine, University of Dundee, Dundee, Angus, DD1 9SY,  
11  
12 Scotland, United Kingdom

13  
14  
15 # These two authors contributed equally to this work.

16  
17 \* Corresponding authors: Dr. Sheyu Li (lisheyu@gmail.com or  
18  
19 lisheyu@scu.edu.cn or [s.r.li@dundee.ac.uk](mailto:s.r.li@dundee.ac.uk)) and Professor Haoming Tian  
20  
21 (hmtian999@126.com), Department of Endocrinology and Metabolism, West  
22  
23 China Hospital, Sichuan University, 37# Guoxue Road, Chengdu, 610041,  
24  
25 Sichuan, China.  
26  
27  
28  
29  
30  
31  
32  
33  
34  
35  
36  
37  
38  
39  
40  
41  
42  
43  
44  
45  
46  
47  
48  
49  
50  
51  
52  
53  
54  
55  
56  
57  
58  
59  
60

## ABSTRACT

### Objectives

Despite the publication of hundreds of trials on gout and hyperuricemia, management of these conditions remains suboptimal. We aimed to assess the quality and consistency of guidance documents for gout and hyperuricemia.

### Design

Systematic review and quality assessment using the Appraisal of Guidelines for Research and Evaluation (AGREE) II.

### Data Sources

PubMed and EMBASE (27 October 2016), two Chinese academic databases, eight guideline databases, and Google and Google scholar (July 2017).

### Eligibility Criteria

We included the latest version of international and national/regional clinical practice guidelines and consensus statements for diagnosis and/or treatment of hyperuricemia and gout, published in English or Chinese.

### Data Extraction and Synthesis

Two reviewers independently screened searched items and extracted data. Four reviewers independently scored documents using the AGREE II. Recommendations from all documents were tabulated and visualized in a coloured grid.

### Results

Twenty-four guidance documents (16 clinical practice guidelines and 8 consensus statements) published between 2003 and 2017 were included. Included documents performed well in the domains of scope and purpose (median 85.4%, range 66.7%-100.0%) and clarity of presentation (median 81.3%, range 48.6%-98.6%), but unsatisfied in applicability (median 9.9%, range 0.0%-66.7%) and editorial independence (median 28.1%, range 0.0%-83.3%). The 2017 British Society of Rheumatology guideline received the highest scores. Recommendations were concordant on the target serum uric acid level for long-term control, on some indications for urate-lowering

1  
2  
3  
4 therapy, and on the first-line drugs for urate-lowering therapy and for acute  
5 attack. Substantially inconsistent recommendations were provided for many  
6 items, especially for the timing of initiation of urate-lowering therapy and for  
7 treatment for asymptomatic hyperuricemia.  
8  
9  
10

### 11 **Conclusions**

12  
13 Methodological quality needs improvement in guidance documents on gout  
14 and hyperuricemia. Evidence for certain clinical questions is lacking, despite  
15 numerous trials in this field. Promoting standard guidance development  
16 methods and synthesizing high-quality clinical evidence are potential  
17 approaches to reduce recommendation inconsistencies.  
18  
19  
20  
21  
22

### 23 **Study registration**

24  
25 PROSPERO (CRD42016046104).  
26  
27  
28

### 29 **Keywords**

30  
31 Clinical practice guideline, Hyperuricemia, Gout, Systematic review  
32  
33  
34  
35  
36  
37  
38  
39  
40  
41  
42  
43  
44  
45  
46  
47  
48  
49  
50  
51  
52  
53  
54  
55  
56  
57  
58  
59  
60



## STRENGTHS AND LIMITATIONS OF THIS STUDY

1. The first systematic review to assess the quality of clinical practice guidelines and consensus statements on the diagnosis and treatment for both hyperuricemia and gout.
2. The first systematic review to summarise recommendations for best practice in hyperuricemia and gout.
3. The Appraisal of Guidelines for Research and Evaluation (AGREE) II instrument is an international, structured, validated, and rigorously developed tool.
4. Each document was evaluated by four reviewers and differences between reviewers were assessed.
5. Only guidance documents in English and Chinese were included.

## BACKGROUND

Gout is an inflammatory arthritis occurring in response to monosodium urate crystals formation, a common and necessary pathogenic factor of which is hyperuricemia. The prevalence of gout and hyperuricemia [1-4], as well as their disease burden [5, 6], are rising globally. More than six hundred clinical studies [7], including observational studies, randomised clinical trials, and mendelian randomization studies, have been published to date. However, the quality of care for gout and hyperuricemia remains suboptimal. The goal of treatment is to reduce the body's total uric acid pool [8, 9] and consequently to minimize the risk of acute flares, arthropathy, nephrolithiasis, and other complications [7, 10, 11]. A study in the United States found that only 22% patients with gout received therapy adhering to all quality indicators [12] and a nationwide population study in the United Kingdom reported that only 48% of prevalent patients received proper consultation and only 27% of incident patients were provided with urate-lowering therapy (ULT) within one year of diagnosis [6].

High-quality guidance documents are important for improving the quality of diagnosis and management of gout and hyperuricemia at individual, community, and national levels [13]. Current guidance documents for hyperuricemia and gout have been developed by rheumatology, endocrinology, and cardiology groups, at regional, national or international levels. Among these documents, the American College of Rheumatology (ACR) guidelines [14, 15], updated in 2012, and the European League Against Rheumatism (EULAR) guidelines [16-18], updated in 2016, have the most substantial global influence. The most recent documents (released in 2017) are two national guidelines, from the American College of Physicians (ACP) [19, 20] and from the British Society of Rheumatology (BSR) [21], and one consensus statement, from the Chinese multi-disciplinary expert task force on hyperuricemia and its related diseases [22].

1  
2  
3  
4  
5  
6  
7  
8  
9  
10  
11  
12  
13  
14  
15  
16  
17  
18  
19  
20  
21  
22  
23  
24  
25  
26  
27  
28  
29  
30  
31  
32  
33  
34  
35  
36  
37  
38  
39  
40  
41  
42  
43  
44  
45  
46  
47  
48  
49  
50  
51  
52  
53  
54  
55  
56  
57  
58  
59  
60

However, current guidance documents on gout and hyperuricemia provide inconsistent recommendations, even those released by highly respected professional organizations, such as the ACP and the ACR [23]. Some distinct differences lie in key aspects for patient care, such as the pharmacological treatment for asymptomatic hyperuricemic patients, the timing of initiation of ULT in patients with gout flare [24], and indications for ULT [25]. These discrepancies may result from ethnic and social differences, but can be consequences of inconsistent guideline development [23]. Low-quality guidance documents put individual patients and communities at risk, and impede clinicians' application of the guidance in daily practice [26]. Hence, we conducted this study to systematically evaluate the quality of guidance documents on gout and hyperuricemia and to compare all key recommendations from different documents.

## **METHODS**

Detailed methods of the study have been published previously [27] and this study was registered with PROSPERO (registration number: CRD42016046104).

### **Literature search and selection criteria**

We systematically searched PubMed and EMBASE from inception to 27 October 2016 using a comprehensive search strategy (Supplementary Table 1 and Supplementary Table 2) to identify guidance documents pertaining to the diagnosis and treatment of hyperuricemia and gout. We searched two academic databases for Chinese publications (the Chinese Biomedical Literature Database and the Wanfang Data) and eight guideline databases from inception to 24 July 2017 using search strategies tailored to different databases (Supplementary Table 3). We also searched Google and Google scholar in July 2017 for potentially eligible guidelines and consensus

1  
2  
3 statements that were not indexed in the aforementioned databases.  
4  
5  
6

7 We included the latest versions of all international and national/regional clinical  
8 practice guidelines and consensus statements for the diagnosis and/or  
9 treatment of hyperuricemia and gout, published in English or Chinese. Two  
10 reviewers (Q.L., X.L.) independently screened all searched papers. Reasons  
11 for exclusion were provided for documents excluded during the full-text review  
12 (Supplementary Table 4). Disagreements were resolved through discussion  
13 with a third reviewer (S.L.).  
14  
15  
16  
17  
18  
19  
20  
21  
22

### 23 **Data extraction**

24 We extracted the following data from each included document: document  
25 characteristics (e.g., year of publication, funding body, evidence base),  
26 recommendations for diagnosis and monitoring of hyperuricemia and gout, and  
27 recommendations for management. Data were extracted by one investigator  
28 (Q.L.) and were checked by a second investigator (X.L.).  
29  
30  
31  
32  
33  
34  
35  
36

### 37 **Appraisal of guidance documents**

38 All included documents were assessed by four reviewers (Q.L., X.L., J.W., and  
39 H.L.) independently using the Appraisal of Guidelines for Research and  
40 Evaluation (AGREE) II instrument [28]. AGREE II is an internationally  
41 developed and validated tool to evaluate the quality of clinical practice  
42 guidelines [29-31] and consensus statements [32, 33].  
43  
44  
45  
46  
47  
48  
49

50 All reviewers completed the online training tutorial [34] before the  
51 commencement of appraisal to ensure standardization. We adapted detailed  
52 instructions for scoring from the AGREE II User's Manual [28] and provided  
53 objective scoring criteria for each item (Supplementary File 1). We selected  
54 four guidance documents for pilot scoring, during which our objective scoring  
55 criteria were discussed and clarified. A meeting was held among reviewers  
56  
57  
58  
59  
60

1  
2  
3  
4 after the appraisal and every item with scores differed more than one point was  
5 discussed. Reviewers were given the opportunity to revise their scores or to  
6 keep the original scores after the meeting. We recorded all original scores,  
7 revised scores, and reasons for modifying scores. We calculated the inter-rater  
8 reliability on the AGREE II using the intra-class correlation coefficient (ICC) via  
9 IBM SPSS (IBM Co., Armonk, New York, USA) when the entire scoring  
10 process was completed. An ICC  $\geq 0.7$  was considered acceptable [35].  
11  
12  
13  
14  
15  
16  
17  
18

### 19 **Recommendation synthesis**

20  
21 We manually extracted descriptive data from all included guidance documents  
22 and tabulated them into the following tables to summarize recommendations:  
23 the diagnosis of gout and hyperuricemia, the treatment of hyperuricemia, the  
24 treatment of acute gout, and the treatment of tophi. Data were extracted by  
25 one investigator (Q.L.) and were checked by a second investigator (X.L.). We  
26 plot the summarized recommendations in a five-colour grid to illustrate  
27 inconsistencies. The most frequently stated content was used as the reference  
28 content. Cells of guidance documents providing consistent recommendations  
29 were coloured in green, while cells of those providing partially consistent  
30 recommendations, which was defined as recommendations including but not  
31 the same as reference contents, were coloured in blue, and of inconsistent  
32 recommendations in red. Where recommendations were not given and were  
33 not applicable, the cell was coloured in yellow and in grey, respectively.  
34  
35  
36  
37  
38  
39  
40  
41  
42  
43  
44  
45  
46  
47

### 48 **Patient involvement**

49 Patients or the public were not involved in the conceptualisation or carrying out  
50 of this research.  
51  
52  
53  
54  
55

## 56 **RESULTS**

### 57 **Search results**

58 Overall, we identified 5811 items across the academic databases, guideline  
59  
60

1  
2  
3  
4 databases, Google, and Google Scholar. After applying the inclusion and  
5  
6 exclusion criteria, 24 guidance documents from 26 papers [14-22, 36-52] were  
7  
8 included in the final appraisal and recommendation synthesis (Figure 1).  
9  
10 Studies excluded after full-text review and reasons for exclusion were provided  
11  
12 as Supplementary Table 4.  
13  
14

### 15 **Characteristics of the included guidelines and consensus statements**

16  
17 Table 1 summarized the characteristics of the included guidance documents,  
18  
19 among which 16 were clinical practice guidelines [14-21, 38, 41, 44-46, 48-52]  
20  
21 and eight were consensus statements [22, 36, 37, 39, 40, 42, 43, 47]. 16  
22  
23 national or regional organizations and three international groups, namely the  
24  
25 3e (Evidence, Expertise, Exchange) Initiative, the EULAR, and the  
26  
27 development group for the Treat-to-target (T2T) recommendations, published  
28  
29 these documents between 2003 to 2017. 16 documents [14-18, 21, 22, 36-38,  
30  
31 40, 42, 43, 45, 46, 49, 50] were issued by rheumatology organizations and  
32  
33 seven [16-18, 36, 39, 42, 43] were developed by multinational development  
34  
35 groups. 17 documents [14-18, 21, 22, 36, 38-41, 43-46, 49, 51] provided  
36  
37 information on guideline development group, among which 11 [14-17, 19-21,  
38  
39 36, 41-43, 45, 46] explicitly stated the involvement of a methodologist. 12  
40  
41 documents [14-18, 21, 22, 38-41, 43-46, 49, 51] provided information on the  
42  
43 target audience, among which only three [16, 38, 44] included the patients. 18  
44  
45 documents [14-21, 36, 39-43, 45, 46, 48-52] reported conducting a systematic  
46  
47 literature review in the development, among which 17 documents [14-21, 36,  
48  
49 39-41, 43, 45, 46, 48-52] reported the level of evidence in support of  
50  
51 recommendations and 16 [16-21, 36, 39-41, 43, 45, 46, 48-52] graded the  
52  
53 strength of recommendations. Ten documents [16, 19-21, 39, 42, 46, 48, 49,  
54  
55 51, 52] clearly stated being externally reviewed. Five [19-21, 46, 49, 50]  
56  
57 provided a clear time of update plan. 12 documents [14, 15, 17-21, 36, 39, 42,  
58  
59 46, 49, 51, 52] provided information on the funding body, among which six [17,  
60  
36, 39, 46, 49, 51] were fully or partially funded by the pharmaceutical industry.

1  
2  
3  
4 The other half did not clearly declare the funding body, which made the impact  
5 of industry on the recommendations ambiguous.  
6  
7  
8

### 9 **Appraisal of guidelines and consensus statements**

10  
11 Figure 2 showed the standardized domain score for each guidance document  
12 for the six quality domains assessed with the AGREE II tool. Domain scores  
13 were provided in value as Supplementary Table 5. Mean score across  
14 reviewers for individual items were provided as Supplementary Table 6. Item  
15 scores for each individual AGREE II item were provided as Supplementary  
16 Table 7). The overall quality of guidelines, as assessed by AGREE II, varied  
17 both between guidance documents across domains and within guidance  
18 documents between domains. The document with the highest domain scores  
19 was published by the BSR in 2017 [21], with five domains scoring above the  
20 upper quartile, followed by the documents published by the ACP in 2017 [19,  
21 20], and by the ACR and the EULAR jointly in 2015 [42], both with four  
22 domains scoring above the upper quartile. Guidelines did not always score  
23 higher than consensus statements. The standardized domain scores for each  
24 domain of all guidance documents were visualized by the year of publication in  
25 Supplementary Figure 1. No tendency of improvement in the quality score was  
26 observed.  
27  
28  
29  
30  
31  
32  
33  
34  
35  
36  
37  
38  
39  
40  
41  
42  
43  
44

45 The AGREE II instrument evaluated guidelines and consensus statements in  
46 six domains, from the development, dissemination, to implementation. The  
47 scope and purpose (domain 1) clarifies the clinical questions. Proper  
48 involvement of stakeholders (domain 2) balances individuals' biases. Rigour of  
49 development (domain 3) is the domain most concerned by clinicians and  
50 ensures the validity of development methodology [53]. Clearly presented  
51 recommendations (domain 4) conveyed precise and accessible information  
52 from the development group to clinicians. Good performances in the  
53 applicability (domain 5) and the editorial independence (domain 6) guarantee  
54  
55  
56  
57  
58  
59  
60

1  
2  
3  
4 the usefulness and the independence of documents.  
5  
6

7  
8 Guidance documents received the highest scores for the scope and purpose  
9 (domain 1, median 85.42%, range 66.67% to 100.00%) and the clarity of  
10 presentation (domain 4, median 79.17%, range 48.61% to 98.61%), and the  
11 lowest scores for the applicability (domain 5, median 10.94%, range 0.00% to  
12 66.67%) and the editorial independence (domain 6, median 28.13%, range  
13 0.00% to 83.33%). The worst scored item was the monitoring or auditing  
14 criteria (mean score 1.2, range 1.0-4.0), followed by the implementation advice  
15 or tools (mean 1.7, range 1.0-4.8), the external review (mean 2.1, range  
16 1.0-6.0), and the updating procedure (mean 2.1, range 1.0-6.5).  
17  
18  
19  
20  
21  
22  
23  
24  
25  
26

27 The ICC was 0.896. Group discussion modified 365/2208 (16.53%) of  
28 individual scores.  
29  
30  
31  
32

### 33 **Synthesis of recommendations**

34  
35 The included guidance documents addressed four major themes: diagnosis of  
36 gout and hyperuricemia, treatment for hyperuricemia, treatment for acute gout  
37 attack, and treatment for tophi. Figure 3 showed the key recommendations and  
38 their inconsistencies.  
39  
40  
41  
42  
43  
44

### 45 **Approaches to diagnostic strategies for gout and hyperuricemia**

46  
47 Thirteen guidance documents [17-20, 22, 36, 38, 40-43, 46, 49, 51] covered  
48 the diagnosis of gout and 11 [17, 22, 37, 38, 45-51] covered diagnosis of  
49 hyperuricemia. Supplementary Table 8 showed the key recommendations.  
50  
51 Three aspects were evaluated commonly in gout diagnosis, which is the  
52 clinical manifestation, considered by all documents, the laboratory result,  
53 considered by all but one document [49], and the imaging result, considered by  
54 all but four documents [17, 19, 20, 49, 51]. Identification of monosodium urate  
55 crystals in synovial fluid or tophi was required for definite diagnosis by all  
56  
57  
58  
59  
60



1  
2  
3 documents.

4  
5  
6  
7 Guidance documents differed when recommending the cut-off serum uric acid  
8 (SUA) level to diagnose hyperuricemia. For any patient with elevated SUA,  
9 four documents [38, 47, 48, 51] recommended 7.0 mg/dL (or 420  $\mu\text{mol/L}$ ) as  
10 the cut-off, while two [17, 45] preferred 6.8 mg/dL. Five documents [22, 37, 46,  
11 49, 50] provided gender-specific cut-offs, recommending 6.0 mg/dL (or 360  
12  $\mu\text{mol/L}$ ) in female and 7.0 mg/dL (or 420  $\mu\text{mol/L}$ ) in male. Asymptomatic  
13 hyperuricemia was defined in seven [36, 38, 46-50] documents, among which  
14 six [36, 38, 46-48, 50] clarified the exclusion of patients with gout and two [36,  
15 48] clarified the exclusion of patients with tophi when making the diagnosis.  
16 Patients with renal diseases were not allowed to be diagnosed with  
17 asymptomatic hyperuricemia in the Japanese [48] and the Philippine [50]  
18 guidelines, but patients with pre-existing renal or cardiovascular diseases were  
19 allowed in the 3e initiative document [36].  
20  
21  
22  
23  
24  
25  
26  
27  
28  
29  
30  
31  
32  
33  
34

### 35 **Approaches to treatment for hyperuricemia**

36 Twenty-two guidance documents [14-17, 19-22, 36-41, 43-52] covered the  
37 treatment for hyperuricemia and Supplementary Table 9 summarized the key  
38 recommendations. All but three documents [19, 20, 44, 52] explicitly  
39 recommended the target levels for long-term SUA control, most of which  
40 preferred 6.0 mg/dL (or 360  $\mu\text{mol/L}$ ), except the South African guideline [51]  
41 that preferred 5.0mg/dL (300  $\mu\text{mol/L}$ ). Only two documents [16, 22]  
42 recommended a lower limit of 3.0 mg/dL (or 180  $\mu\text{mol/L}$ ) for long-term SUA  
43 management and only the 2016 EULAR guideline [16] provided evidence that  
44 low SUA might increase the risk of neurodegenerative diseases, although the  
45 level of evidence and the grade of recommendation were low.  
46  
47  
48  
49  
50  
51  
52  
53  
54  
55  
56  
57

58 All but six guidance documents [36, 39, 40, 43, 44, 52] provided indications for  
59 long-term ULT. Recurrent attacks [14-17, 19-22, 41, 45, 48-51], tophi [14-17,  
60

1  
2  
3  
4 19-22, 38, 41, 45, 48-51], urate nephrolithiasis [14-17, 19-22, 37, 38, 49, 50],  
5 arthropathy [16, 17, 21, 22, 38, 41, 45, 49], and comorbidities [14-16, 19-22,  
6 37, 47, 49, 50] were the most commonly recommended indications. The  
7 definition of recurrent attacks varied from at least once per year [17] to at least  
8 three times per year [49], while the majority of documents [14-16, 19-21, 41]  
9 recommended twice per year as the cut-off.  
10  
11  
12  
13  
14  
15  
16

17 Regarding the timing to initiate ULT, agreement was not made whether to start  
18 pharmacological ULT after an acute attack [17, 21, 22, 36-38, 40, 48, 49, 51,  
19 52] or during an attack [14, 15, 37], and when recommending to start ULT after  
20 an attack, the preferred time to wait since the resolution of attack varied from  
21 two weeks [37, 48] to six weeks [52]. All guidance documents based this  
22 recommendation on expert opinions due to insufficient evidence.  
23  
24  
25  
26  
27  
28

29 Considerations supporting not starting ULT during an attack included that ULT  
30 was better discussed when the patient was not painful [21], and that ULT  
31 initiation could prolong or worsen the acute attack [51]. Two documents [16,  
32 39] explicitly presented the currently conflicting views and insufficient evidence  
33 and stated consequently no recommendation for this issue.  
34  
35  
36  
37  
38  
39

40 When pharmacological ULT options were provided with prioritization,  
41 allopurinol was recommended by all guidance documents [14-17, 21, 36, 40,  
42 43, 45, 46, 48-50] to be the first-line drug, while febuxostat was recommended  
43 by three documents [14, 15, 17, 46] to be the first-line and by six documents  
44 [16, 21, 36, 40, 43, 45] to be the second-line. However, recommendations on  
45 the dosage of allopurinol varied largely. The maximum dose per day  
46 recommended for allopurinol varied from 300 mg [51], 600 mg [22, 37, 47], 800  
47 mg [14, 15, 17, 38, 45], to 900 mg [21, 43, 46], and the daily starting dose  
48 recommended in patients with normal renal function varied between 50 mg  
49 [19, 20, 22, 47, 48, 51] and 200 mg [21]. As for patients with impaired renal  
50 function, the cut-off to initiate dose adjustment was provided diversely as  
51  
52  
53  
54  
55  
56  
57  
58  
59  
60

1  
2  
3  
4 creatinine clearance (CCr) 20-140 mL/min [37, 45, 46, 49, 51], or estimated  
5  
6 glomerular filtration rate (eGFR) 130 ml/min/1.73m<sup>2</sup> [21]. One document  
7  
8 preferred to depend allopurinol dose solely on eGFR by limiting the maximum  
9  
10 dose to 1.5 mg/eGFR in patients with renal impairment [22]. HLA-B\*5801 gene  
11  
12 screening prior to allopurinol use was recommended by five guidance  
13  
14 documents [14, 15, 21, 22, 37, 38].  
15  
16

17  
18 For patients with asymptomatic hyperuricemia, 14 guidance documents [14,  
19  
20 15, 17, 21, 36-40, 43, 47-49, 51, 52] commented on the option of  
21  
22 pharmacological ULT, among which, five [17, 21, 38, 51, 52] explicitly  
23  
24 recommended no treatment and three [47-49] recommended pharmacological  
25  
26 treatments in patients with comorbidities [47, 48] or with very high SUA levels  
27  
28 [40, 47-49]. The cut-off SUA level to indicate ULT in patients with  
29  
30 asymptomatic hyperuricemia varied from 8.0 mg/dL [47, 48] to 13.0 mg/dL  
31  
32 [49]. The Portuguese document [40] was incoherent itself by generally stating  
33  
34 that pharmacological treatment was not recommended while also considered it  
35  
36 in patients with SUA higher than 9 mg/dL. No evidence was provided by these  
37  
38 documents to support pharmacological treatment for asymptomatic  
39  
40 hyperuricemia directly, and such recommendations were made in concern of  
41  
42 the onset of gout [40] and the risk of cardiovascular disorders [47, 48].  
43  
44

### 45 **Approaches to treatment for the acute gout attack**

46  
47 Twenty-one guidance documents [14-17, 19-22, 36-41, 43-46, 48-52] covered  
48  
49 the treatment for acute gout attack and Supplementary Table 10 summarized  
50  
51 their key recommendations. Non-steroidal anti-inflammatory drugs (NSAIDs)  
52  
53 was recommended by all but three documents [19, 20, 39, 44] as the first line  
54  
55 pharmacological treatment, while colchicine by 11 documents [14-17, 21, 22,  
56  
57 36, 37, 40, 43, 45, 48]. Colchicine was recommended to be given in a fixed  
58  
59 dose by three documents [38, 40, 48] and in a loading dose followed by  
60  
different doses by six documents [14-17, 19, 20, 22, 38, 51, 52]. Seven

1  
2  
3  
4 documents [21, 36, 41, 43, 45, 49, 50] only provided the total daily dose for  
5 colchicine regardless of the regimen, the doses recommended by which varied  
6 from 1 mg [21, 49, 50] to 2.4 mg [49], except that one document [43]  
7 recommended 1.8 g in 24 hours without any further explanation. Systemic  
8 steroids were recommended by all but three documents [37, 39, 44], among  
9 which six [14-17, 19, 20, 36, 43] recommended them as the first-line option  
10 and ten [21, 22, 38, 41, 45, 46, 48, 50-52] recommended them when NSAIDs  
11 and colchicine were contraindicated or intolerant. Intra-articular steroids  
12 injection was recommended by 14 documents [14-17, 21, 22, 36, 38, 40, 43,  
13 45, 46, 49, 51, 52], among which five [14-16, 21, 36, 43] clearly recommended  
14 it as the first-line option.  
15  
16  
17  
18  
19  
20  
21  
22  
23  
24  
25  
26

### 27 **Approaches to treatment for tophi**

28  
29 Twenty-one guidance documents [14-17, 19-22, 36-41, 43-46, 48-52] covered  
30 the treatment for tophi and Supplementary Table 11 showed their key  
31 recommendations. Surgery was recommended by nine documents [22, 36, 38,  
32 40, 43, 48, 49, 51], among which five [22, 36, 38, 43, 49] explicitly presented  
33 the indications, most commonly nerve compression [22, 36, 38, 43] and  
34 infection [36, 38, 43]. The risk for surgery was discussed by one document [51]  
35 and it only mentioned wound healing. Long-term ULT was recommended by all  
36 but two documents [44, 52], but the pharmacological treatment was only  
37 explicitly recommended by eight of them [15-17, 21, 37, 43, 46, 51].  
38  
39  
40  
41  
42  
43  
44  
45  
46  
47

## 48 **DISCUSSION**

### 49 **Principal findings and interpretations**

50  
51 This systematic review, including 16 guidelines and eight consensus  
52 statements, found generally low methodological quality and inconsistent  
53 recommendations from guidance documents covering the diagnosis and  
54 management of gout and hyperuricemia. During revision of our work, the  
55 English version of two documents, from the Chinese Multidisciplinary Expert  
56  
57  
58  
59  
60

1  
2  
3  
4 Task Force on Hyperuricemia and Related Diseases [54] and the Taiwan  
5 Rheumatologist Association [55], respectively, were released. Despite the  
6 increase in the number of guidance documents published between 2003 and  
7 2017, the quality of documents in all domains did not seem to improve with  
8 time. To date, this is the first systematic appraisal for the quality of guidelines  
9 and consensus statements pertaining to both hyperuricemia.  
10  
11  
12  
13  
14  
15  
16

### 17 **Comparison with existing research**

18  
19 Guidance documents assessed in our study performed acceptable in the  
20 scope and purpose and the clarity of presentation, but unsatisfied in the  
21 applicability. These results were consistent with two previous reviews [56, 57],  
22 one of which systematically reviewed and assessed the quality of all guidelines  
23 for gout and the other assessed three documents released respectively by the  
24 3e initiative [36], the ACR [14, 15], and the EULAR [18, 58]. Our study  
25 systematically included both guidelines and consensus statements in the field  
26 of both hyperuricemia and gout and further suggested that this trend of differed  
27 quality by domains and differed recommendations was shared by all guidance  
28 documents for gout and hyperuricemia.  
29  
30  
31  
32  
33  
34  
35  
36  
37  
38  
39  
40

41 Previous reviews of guidance documents in endocrinology and rheumatology  
42 diseases, such as diabetes [59, 60], thyroid disorders [31, 61], rheumatoid  
43 arthritis [32, 62, 63], and systemic lupus erythematosus [64], as well as  
44 reviews for guidance in other specialities [33, 65-67], gave similarly high  
45 scores in the scope and purpose and the clarity and presentation, and similarly  
46 low scores in the applicability and the editorial independence. Despite  
47 generally low and varied scores in the applicability, guidance documents on  
48 gout and hyperuricemia performed poorer in this domain comparing to the  
49 majority of other documents [31-33, 59-61, 63-67], suggesting that the  
50 negligence of the usefulness of guidance being more challenging in gout and  
51 hyperuricemia. Considering the time and cost to perform economic evaluations  
52  
53  
54  
55  
56  
57  
58  
59  
60

1  
2  
3  
4 and pilot studies, a stable and long-term task force of guideline development is  
5 required. Despite the practical difficulties, guidance documents were  
6 suggested to at least inform audience the need to consider these issues [65].  
7  
8 Low scores in the editorial independence often resulted from lacking of  
9 detailed information on the influence of funding body and conflict of interests.  
10  
11 We found that 50% of documents declaring funding sources were supported  
12 by the pharmaceutical industry, calling for awareness of the potential influence  
13 of pharmaceutical industry on the synthesis of clinical guidance and for the  
14 need of promoting transparency in the financial declaration.  
15  
16  
17  
18  
19  
20  
21  
22

### 23 **Clinical implications and future research**

24  
25 Guidance documents were concordant and recommended to target for SUA <  
26 6.0 mg/dL (or 360umol/L) for long-term control, to consider recurrent attacks  
27 as one of the indications for ULT, although the definitions for recurrent attacks  
28 differed, to consider allopurinol as the first-line ULT and NSAIDs as the  
29 first-line drug in acute attack, and to consider long-term ULT in patient with  
30 tophi. Despite these similarities, recommendations differed in the majority of  
31 items and these discrepancies might come from several sources, including  
32 ethnic difference, quality of documents, and lacking of evidence.  
33  
34  
35  
36  
37  
38  
39  
40  
41

42  
43 Ethnical and social differences are important sources for recommendation  
44 diversity and such diversity is encouraged to improve the precision of  
45 guidance. Ethnicity difference explained the tendency of positive  
46 recommendations on HLA-B\*5801 gene screening before prescribing  
47 allopurinol by Asian guidance documents [22, 37, 38]. The risk of  
48 hypersensitivity reactions associated with allopurinol is significantly increased  
49 in individuals carrying the variant allele HLA-B\*5801, the frequency of which in  
50 Han Chinese, Korean, and Tai people are higher than that in the Caucasian  
51 population [14, 15, 21]. Studies suggested that HLA-B\*5801 gene screening  
52 prior to allopurinol initiation is cost-effective for Asians but not Caucasians [68,  
53  
54  
55  
56  
57  
58  
59  
60

1  
2  
3  
4 69]. Providing ethnicity-specific recommendations or explicitly specifying the  
5  
6 ethnicity of target audience help clarify the source of inconsistency and  
7  
8 improve the precision of recommendations.  
9

10  
11 However, the low quality of guidance documents also leads to discrepant  
12  
13 recommendations and consequently chaos in application. Such discrepancies  
14  
15 are concerned by clinicians when applying these recommendations in clinical  
16  
17 practice and are observed to affect recommendations in the guidance  
18  
19 documents for hyperuricemia and gout. Comparing with documents with high  
20  
21 quality (scoring above the upper quartile in at least three out of the six AGREE  
22  
23 II domains) [16, 19-21, 36, 42, 46], those with low quality (scoring below the  
24  
25 lower quartile in at least three out of the six AGREE II domains) [22, 37, 38, 44,  
26  
27 47, 52] provided ambiguous prioritization of ULT drugs for hyperuricemia and  
28  
29 of steroid options for acute attack. Among all domains assessed by the  
30  
31 AGREE II instrument, those pertaining to stakeholder involvement, rigor of  
32  
33 development, applicability and editorial independence could be primarily  
34  
35 improved by standardizing the developing processes, which consequently  
36  
37 improved the reliability of recommendations. These results reinforced that it is  
38  
39 better for clinicians to refer to high-quality guidance documents instead of the  
40  
41 low-quality ones. However, when high-quality documents are unavailable in  
42  
43 local language, referring to low-quality local documents might mislead clinical  
44  
45 practice in the region. It is thus more challenging for non-English speaking  
46  
47 countries, including China[13].  
48  
49

50  
51 Guidance documents are considered as the starting point to identify evidence  
52  
53 gaps and to prioritize research questions [70]. Evidence gap was an issue  
54  
55 commonly discussed in the recommendations of treatment for asymptomatic  
56  
57 hyperuricemia, by five [14, 15, 36, 37, 39, 43] out of 14 documents [14, 15, 17,  
58  
59 21, 36-40, 43, 47-49, 51, 52], and of timing to initiate ULT, by two [16, 39] out  
60  
of 14 documents [14-17, 21, 22, 36-40, 48, 49, 51, 52]. Although the rest of

1  
2  
3 documents provided explicit recommendations, they based their  
4  
5 recommendations either on indirect evidence or expert opinions. Evidence  
6  
7 synthesis for the effects of pharmacological ULT in patients with asymptomatic  
8  
9 hyperuricemia and for the optimal timing to initiate ULT in patients with the  
10  
11 acute attack is warranted to improve the strength and consistency of these  
12  
13 recommendations.  
14  
15

### 17 **Strengths and limitations**

19 Strengths of our review included a systematic approach to identify guidance  
20  
21 documents pertaining to the diagnosis and management of hyperuricemia and  
22  
23 gout. Both guidelines and consensus statements were evaluated and  
24  
25 compared. We used the AGREE II instrument, an international, validated and  
26  
27 rigorously developed tool, to assess the quality of document development and  
28  
29 we tailored the AGREE II instrument to point-by-point scoring criteria  
30  
31 (Supplementary File 1) to improve the objectivity and reproducibility of our  
32  
33 study. We summarized all key recommendations and compared and visualized  
34  
35 the inconsistencies among them, providing concise but informative overview  
36  
37 for clinicians and researchers.  
38  
39

40 Our study also has limitations. Firstly, we only included documents published  
41  
42 in English or Chinese, which could lead to a risk of neglecting essential  
43  
44 documents from regions not using English or Chinese as the first language.  
45  
46 We attempted to mitigate this risk by tailoring our search strategy to identify the  
47  
48 English versions of guidance documents published from these regions.  
49  
50 Secondly, unconscious bias from a subjective rating of documents was  
51  
52 inevitable. We avoided inviting co-authors of guidance documents as a  
53  
54 reviewer to prevent subconscious competing interest and conducted two  
55  
56 rounds of group discussions to minimize subjective bias. Thirdly, the AGREE II  
57  
58 instrument itself has weaknesses [31, 59, 67, 71], although it was the most  
59  
60 commonly used tool to assess the quality of guidance documents. The AGREE



1  
2  
3  
4 system assigned equal weight to all six domains, regardless of their relative  
5 importance [72]. Although the higher quality of development methodology and  
6 more transparency of reporting is associated with recommendations that are  
7 more reliable, proper methodology and transparency do not guarantee better  
8 patient outcomes. Hence, the quality scores assessed by the AGREE II should  
9 be interpreted with caution when used to indicate which guidelines to follow in  
10 clinical practice. Moreover, the subjective interpretation of scoring criteria  
11 impeded the replicability of AGREE II studies and direct comparison of quality  
12 scores in guidance documents provided by different reviews.  
13  
14  
15  
16  
17  
18  
19  
20  
21  
22

## 23 **CONCLUSIONS**

24  
25 The methodological quality needs to be improved in the current guidelines on  
26 the diagnosis and management of hyperuricemia and gout, as assessed by the  
27 AGREE II. Inconsistent recommendations are common, even in some key  
28 aspects. Promoting standard methods for guidance documents development  
29 and synthesizing high-quality clinical evidence to fill in evidence gaps are  
30 warranted to improve the quality of guidance documents.  
31  
32  
33  
34  
35  
36  
37  
38  
39

## 40 **COMPETING INTERESTS**

41 The authors declare that they have no competing interests.  
42  
43  
44

## 45 **FUNDING**

46 This research received no specific funding from any bodies in the public,  
47 commercial, or not-for-profit sectors. Anoop Shah is supported by the National  
48 Institute for Health Research University College London Hospitals Biomedical  
49 Research Centre. Harry Hemingway is a National Institute for Health Research  
50 (NIHR) Senior Investigator. His work is supported by: 1. Health Data Research  
51 UK, which is funded by the UK Medical Research Council, Engineering and  
52 Physical Sciences Research Council, Economic and Social Research Council,  
53 Department of Health and Social Care (England), Chief Scientist Office of the  
54  
55  
56  
57  
58  
59  
60

1  
2  
3  
4 Scottish Government Health and Social Care Directorates, Health and Social  
5 Care Research and Development Division (Welsh Government), Public Health  
6 Agency (Northern Ireland), British Heart Foundation and Wellcome Trust. 2.  
7  
8 The BigData@Heart Consortium, funded by the Innovative Medicines  
9  
10 Initiative-2 Joint Undertaking under grant agreement No. 116074. This Joint  
11  
12 Undertaking receives support from the European Union's Horizon 2020  
13  
14 research and innovation programme and EFPIA; it is chaired, by DE Grobbee  
15  
16 and SD Anker, partnering with 20 academic and industry partners and ESC. 3.  
17  
18 The National Institute for Health Research University College London  
19  
20 Hospitals Biomedical Research Centre. Sheyu Li was supported by grants  
21  
22 from the National Natural Science Foundation of China [grant number  
23  
24 81400811 and 21534008], National Basic Research Program of China [grant  
25  
26 number 2015CB942800], the Scientific Research Project of Health and Family  
27  
28 Planning Commission of Sichuan Province [grant number 130029, 150149,  
29  
30 17PJ063 and 17PJ445], Cholesterol Fund by China Cardiovascular  
31  
32 Foundation and China Heart House and the International Visiting Program for  
33  
34 Excellent Young Scholars of Sichuan University.  
35  
36  
37  
38

### 39 **AUTHORS' CONTRIBUTIONS**

40 HT and SL conceived this study. QL, JSWK, and SL designed the  
41  
42 inclusion/exclusion criteria and the searching resource and strategy. QL,  
43  
44 JSWK, HC, LL, and XS designed the appraisal strategy of each included  
45  
46 guideline and consensus. QL and XL searched literature search and extracted  
47  
48 data. QL, XL, JW, HL, and SL assessed the quality of each document. QL  
49  
50 analysed and visualized the outcomes. SC, AS, YC, AZ, XS, and HH provided  
51  
52 critical review. QL, XL, and SL drafted the manuscript. All authors discussed  
53  
54 actively in the protocol of the study.  
55  
56  
57

### 58 **DATA AVAILABILITY**

59 All data in this paper were obtained from published studies. No additional data  
60

1  
2  
3  
4 are available from the authors.  
5  
6  
7  
8  
9  
10  
11  
12  
13  
14  
15  
16  
17  
18  
19  
20  
21  
22  
23  
24  
25  
26  
27  
28  
29  
30  
31  
32  
33  
34  
35  
36  
37  
38  
39  
40  
41  
42  
43  
44  
45  
46  
47  
48  
49  
50  
51  
52  
53  
54  
55  
56  
57  
58  
59  
60

For peer review only

## REFERENCES

1. Lawrence RC, Felson DT, Helmick CG, Arnold LM, Choi H, Deyo RA, Gabriel S, Hirsch R, Hochberg MC, Hunder GG: **Estimates of the prevalence of arthritis and other rheumatic conditions in the United States: Part II.** *Arthritis & Rheumatology* 2008, **58**(1):26-35.
2. Liu R, Han C, Wu D, Xia X, Gu J, Guan H, Shan Z, Teng W: **Prevalence of hyperuricemia and gout in mainland China from 2000 to 2014: a systematic review and meta-analysis.** *BioMed research international* 2015, **2015**.
3. Kuo C-F, Grainge MJ, Zhang W, Doherty M: **Global epidemiology of gout: prevalence, incidence and risk factors.** *Nature reviews rheumatology* 2015, **11**(11):649.
4. Smith E, March L: **Global prevalence of hyperuricemia: a systematic review of population-based epidemiological studies.** *Arthritis & Rheumatology* 2015, **67**:2690-2692.
5. Smith E, Hoy D, Cross M, Merriman TR, Vos T, Buchbinder R, Woolf A, March L: **The global burden of gout: estimates from the Global Burden of Disease 2010 study.** *Annals of the rheumatic diseases* 2014, **73**(8):1470-1476.
6. Kuo C-F, Grainge MJ, Mallen C, Zhang W, Doherty M: **Rising burden of gout in the UK but continuing suboptimal management: a nationwide population study.** *Annals of the rheumatic diseases* 2014:annrheumdis-2013-204463.
7. Li X, Meng X, Timofeeva M, Tzoulaki I, Tsilidis KK, Ioannidis P, Campbell H, Theodoratou E: **Serum uric acid levels and multiple health outcomes: umbrella review of evidence from observational studies, randomised controlled trials, and Mendelian randomisation studies.** *BMJ (Clinical research ed)* 2017, **357**:j2376.
8. Tausche A-K, Jansen TL, Schröder H-E, Bornstein SR, Aringer M, Müller-Ladner U: **Gout—current diagnosis and treatment.** *Deutsches*

- 1  
2  
3  
4  
5  
6  
7  
8  
9  
10  
11  
12  
13  
14  
15  
16  
17  
18  
19  
20  
21  
22  
23  
24  
25  
26  
27  
28  
29  
30  
31  
32  
33  
34  
35  
36  
37  
38  
39  
40  
41  
42  
43  
44  
45  
46  
47  
48  
49  
50  
51  
52  
53  
54  
55  
56  
57  
58  
59  
60
- Aerzteblatt International* 2009, **106**(34-35):549.
9. Dincer HE, Dincer AP, Levinson DJ: **Asymptomatic hyperuricemia: to treat or not to treat.** *Cleveland Clinic journal of medicine* 2002, **69**(8):594-608.
10. Pittman JR, Bross MH: **Diagnosis and management of gout.** *American family physician* 1999, **59**(7):1799-1806, 1810.
11. Perez-Ruiz F, Lioté F: **Lowering serum uric acid levels: what is the optimal target for improving clinical outcomes in gout?** *Arthritis care & research* 2007, **57**(7):1324-1328.
12. Singh JA, Hodges JS, Toscano JP, Asch SM: **Quality of care for gout in the US needs improvement.** *Arthritis care & research* 2007, **57**(5):822-829.
13. Chen Y, Wang C, Shang H, Yang K, Norris SL: **Clinical practice guidelines in China.** *BMJ (Clinical research ed)* 2018, **360**:j5158.
14. Khanna D, Fitzgerald JD, Khanna PP, Bae S, Singh MK, Neogi T, Pillinger MH, Merrill J, Lee S, Prakash S *et al*: **2012 American College of Rheumatology guidelines for management of gout. Part 1: systematic nonpharmacologic and pharmacologic therapeutic approaches to hyperuricemia.** *Arthritis care & research* 2012, **64**(10):1431-1446.
15. Khanna D, Khanna PP, Fitzgerald JD, Singh MK, Bae S, Neogi T, Pillinger MH, Merrill J, Lee S, Prakash S *et al*: **2012 American college of rheumatology guidelines for management of gout. part 2: Therapy and antiinflammatory prophylaxis of acute gouty arthritis.** *Arthritis Care and Research* 2012, **64**(10):1447-1461.
16. Richette P, Doherty M, Pascual E, Barskova V, Becce F, Castaneda-Sanabria J, Coyfish M, Guillo S, Jansen TL, Janssens H *et al*: **2016 updated EULAR evidence-based recommendations for the management of gout.** *Annals of the rheumatic diseases* 2016.

- 1  
2  
3  
4 17. Hamburger M, Baraf HS, Adamson TC, 3rd, Basile J, Bass L, Cole B,  
5  
6  
7  
8  
9  
10  
11  
12  
13  
14  
15  
16  
17  
18  
19  
20  
21  
22  
23  
24  
25  
26  
27  
28  
29  
30  
31  
32  
33  
34  
35  
36  
37  
38  
39  
40  
41  
42  
43  
44  
45  
46  
47  
48  
49  
50  
51  
52  
53  
54  
55  
56  
57  
58  
59  
60  
20. Qaseem A, Harris RP, Forciea MA: **Management of acute and  
recurrent gout: a clinical practice guideline from the American  
College of Physicians.** *Annals of internal medicine* 2017,  
**166(1):58-68.**
17. Hamburger M, Baraf HS, Adamson TC, 3rd, Basile J, Bass L, Cole B,  
Doghramji PP, Guadagnoli GA, Hamburger F, Harford R *et al*: **2011  
Recommendations for the diagnosis and management of gout and  
hyperuricemia.** *Postgraduate medicine* 2011, **123(6 Suppl 1):3-36.**
18. Zhang W, Doherty M, Pascual E, Bardin T, Barskova V, Conaghan P,  
Gerster J, Jacobs J, Leeb B, Liote F *et al*: **EULAR evidence based  
recommendations for gout. Part I: Diagnosis. Report of a task  
force of the Standing Committee for International Clinical Studies  
Including Therapeutics (ESCSIT).** *Annals of the rheumatic diseases*  
2006, **65(10):1301-1311.**
19. Qaseem A, McLean RM, Starkey M, Forciea MA: **Diagnosis of acute  
gout: a clinical practice guideline from the American College of  
Physicians.** *Annals of internal medicine* 2017, **166(1):52-57.**
20. Qaseem A, Harris RP, Forciea MA: **Management of acute and  
recurrent gout: a clinical practice guideline from the American  
College of Physicians.** *Annals of internal medicine* 2017,  
**166(1):58-68.**
21. Hui M, Carr A, Cameron S, Davenport G, Doherty M, Forrester H,  
Jenkins W, Jordan KM, Mallen CD, McDonald TM: **The British Society  
for Rheumatology guideline for the management of gout.**  
*Rheumatology* 2017, **56(7):1056-1059.**
22. Multi-disciplinary Expert Task Force on Hyperuricemia and Its Related  
Diseases. **Chinese multi-disciplinary consensus on the diagnosis  
and treatment of hyperuricemia and its related diseases.** *Chin J  
Intern Med.* 2017: **56(3): 235-248** (Original document in Chinese).
23. McLean RM: **The long and winding road to clinical guidelines on  
the diagnosis and management of gout.** *Annals of internal medicine*  
2017, **166(1):73-74.**
24. Bardin T, Richette P: **Crystal arthritis: new ACR guidelines for gout  
management hold some surprises.** *Nature Reviews Rheumatology*

- 2013, **9**(1):9.
25. Dalbeth N, Bardin T, Doherty M, Lioté F, Richette P, Saag KG, So AK, Stamp LK, Choi HK, Terkeltaub R: **Discordant American College of Physicians and international rheumatology guidelines for gout management: consensus statement of the Gout, Hyperuricemia and Crystal-Associated Disease Network (G-CAN)**. *Nature Reviews Rheumatology* 2017, **13**(9):561.
26. Khanna PP, FitzGerald J: **Evolution of management of gout: a comparison of recent guidelines**. *Current opinion in rheumatology* 2015, **27**(2):139-146.
27. Li Q, Li X, Kwong JS-W, Chen H, Sun X, Tian H, Li S: **Diagnosis and treatment for hyperuricaemia and gout: a protocol for a systematic review of clinical practice guidelines and consensus statements**. *BMJ open* 2017, **7**(6):e014928.
28. Brouwers MC, Kho ME, Browman GP, Burgers JS, Cluzeau F, Feder G, Fervers B, Graham ID, Grimshaw J, Hanna SE: **AGREE II: advancing guideline development, reporting and evaluation in health care**. *Canadian Medical Association Journal* 2010, **182**(18):E839-E842.
29. Nuckols TK, Anderson L, Popescu I, Diamant AL, Doyle B, Di Capua P, Chou R: **Opioid prescribing: a systematic review and critical appraisal of guidelines for chronic pain**. *Annals of internal medicine* 2014, **160**(1):38-47.
30. Deng Y, Luo L, Hu Y, Fang K, Liu J: **Clinical practice guidelines for the management of neuropathic pain: a systematic review**. *BMC anesthesiology* 2015, **16**(1):12.
31. Huang T-W, Lai J-H, Wu M-Y, Chen S-L, Wu C-H, Tam K-W: **Systematic review of clinical practice guidelines in the diagnosis and management of thyroid nodules and cancer**. *BMC medicine* 2013, **11**(1):191.

- 1  
2  
3  
4 32. Lopez-Olivo MA, Kallen MA, Ortiz Z, Skidmore B, Suarez-Almazor ME:  
5  
6 **Quality appraisal of clinical practice guidelines and consensus**  
7 **statements on the use of biologic agents in rheumatoid arthritis: a**  
8 **systematic review.** *Arthritis care & research* 2008, **59**(11):1625-1638.  
9  
10  
11  
12 33. Nagler EV, Vanmassenhove J, van der Veer SN, Nistor I, Van Biesen  
13 W, Webster AC, Vanholder R: **Diagnosis and treatment of**  
14 **hyponatremia: a systematic review of clinical practice guidelines**  
15 **and consensus statements.** *BMC medicine* 2014, **12**(1):231.  
16  
17  
18  
19 34. **AGREE II training tools. Accessed at**  
20 **<http://www.agreetrust.org-resource-centre-agree-ii-training-tooles/>**  
21 **on 01 August 2017.**  
22  
23  
24  
25 35. Brouwers MC, Kho ME, Browman GP, Burgers JS, Cluzeau F, Feder G,  
26 Fervers B, Graham ID, Hanna SE, Makarski J: **Development of the**  
27 **AGREE II, part 1: performance, usefulness and areas for**  
28 **improvement.** *Canadian Medical Association Journal* 2010,  
29 **182**(10):1045-1052.  
30  
31  
32  
33  
34  
35 36. Sivera F, Andres M, Carmona L, Kydd ASR, Moi J, Seth R,  
36 Sriranganathan M, Van Durme C, Van Echteld I, Vinik O *et al*:  
37 **Multinational evidence-based recommendations for the diagnosis**  
38 **and management of gout: Integrating systematic literature review**  
39 **and expert opinion of a broad panel of rheumatologists in the 3e**  
40 **initiative.** *Annals of the rheumatic diseases* 2014, **73**(2):328-335.  
41  
42  
43  
44  
45  
46  
47 37. Chinese Society of Endocrinology. **Chinese consensus on the**  
48 **management of hyperuricemia and gout.** *Chin J Endocrinol Metab.*  
49 2013; **29**(11): 913-920 (Original document in Chinese).  
50  
51  
52  
53 38. Association TR: **Taiwan guideline for the management of gout and**  
54 **hyperuricemia - updated 2016.** *Formosan Journal of Rheumatology*  
55 2016, **30**:1-32.  
56  
57  
58  
59 39. Kiltz U, Smolen J, Bardin T, Cohen Solal A, Dalbeth N, Doherty M,  
60



- 1  
2  
3  
4 Engel B, Flader C, Kay J, Matsuoka M *et al*: **Treat-to-target (T2T)**  
5 **recommendations for gout.** *Annals of the rheumatic diseases* 2016.  
6  
7  
8 40. Araujo F, Cordeiro I, Teixeira F, Rovisco J, Ramiro S, Mourao AF,  
9 Costa JA, Pimentao JB, Malcata A, Santos MJ *et al*: **Portuguese**  
10 **recommendations for the diagnosis and management of gout.** *Acta*  
11 *reumatologica portuguesa* 2014, **39**(2):158-171.  
12  
13  
14  
15 41. Chinese Rheumatology Association. **2016 Chinese guideline on the**  
16 **diagnosis and management of gout.** *Chin J Intern Med.* 2016: **55**(11):  
17 892-899 (Original document in Chinese).  
18  
19  
20  
21 42. Neogi T, Jansen TLTA, Dalbeth N, Fransen J, Schumacher HR,  
22 Berendsen D, Brown M, Choi H, Edwards NL, Janssens HJEM *et al*:  
23 **2015 Gout classification criteria: An American College of**  
24 **Rheumatology/European League Against Rheumatism**  
25 **collaborative initiative.** *Annals of the rheumatic diseases* 2015,  
26 **74**(10):1789-1798.  
27  
28  
29  
30  
31  
32  
33 43. Graf SW, Whittle SL, Wechalekar MD, Moi JHY, Barrett C, Hill CL,  
34 Littlejohn G, Lynch N, Major G, Taylor AL *et al*: **Australian and New**  
35 **Zealand recommendations for the diagnosis and management of**  
36 **gout: Integrating systematic literature review and expert opinion in**  
37 **the 3e Initiative.** *International journal of rheumatic diseases* 2015,  
38 **18**(3):341-351.  
39  
40  
41  
42  
43  
44 44. Federal Ministry of Health (Nigeria). **National nutritional guideline on**  
45 **non-communicable disease prevention, control and management.**  
46 Accessed at <http://www.health.gov.ng/doc/NutritionalGuideline.pdf> on  
47 28 July 2017.  
48  
49  
50  
51  
52 45. Manara M, Bortoluzzi A, Favero M, Prevete I, Scire CA, Bianchi G,  
53 Borghi C, Cimmino MA, D'Avola GM, Desideri G *et al*: **Italian Society**  
54 **of Rheumatology recommendations for the management of gout.**  
55 *Reumatismo* 2013, **65**(1):4-21.  
56  
57  
58  
59  
60 46. Spanish Society of Rheumatology (SER). **Clinical practice guidelines**

- 1  
2  
3  
4 **for management of gout.** Accessed at  
5 [https://www.ser.es/wp-content/uploads/2015/09/GuipClinGot\\_1140226](https://www.ser.es/wp-content/uploads/2015/09/GuipClinGot_1140226)  
6 [\\_EN.pdf](#) on 28 July 2017.  
7  
8
- 9  
10 47. Hu D, Ding R: **The diagnosis and treatment advice of**  
11 **cardiovascular disease combined asymptomatic hyperuricemia**  
12 **(second edition).** *Chinese Journal of Cardiovascular Research* 2012,  
13 **10(4):241-249.**  
14  
15  
16  
17 48. Yamanaka H: **Japanese guideline for the management of**  
18 **hyperuricemia and gout: second edition.** *Nucleosides, nucleotides &*  
19 *nucleic acids* 2011, **30(12):1018-1029.**  
20  
21  
22  
23 49. **Ministry of Health Malaysia (MOH). Management of gout.** Accessed  
24 **at <http://www.moh.gov.my/penerbitan/CPG2017/3893.pdf> on 28**  
25 **July 2017.**  
26  
27  
28  
29 50. Li-Yu J, Salido E, Manahan S, Lichauco J, Lorenzo J, Torralba K, Raso  
30 A, Roberto L, Santos EP, Maceda L: **Philippine clinical practice**  
31 **guidelines for the management of gout.** *International journal of*  
32 *rheumatic diseases* 2008, **11:A362.**  
33  
34  
35  
36  
37 51. Meyers OL, Cassim B, Mody GM: **Hyperuricaemia and gout: clinical**  
38 **guideline 2003.** *South African medical journal = Suid-Afrikaanse*  
39 *tydskrif vir geneeskunde* 2003, **93(12 Pt 2):961-971.**  
40  
41  
42  
43 52. The University of Texas at Austin, School of Nursing, Family Nurse  
44 Practitioner Program. **Management of initial gout in adults.** Accessed  
45 **at**  
46 **[http://www.alabmed.com/uploadfile/2014/0515/20140515070230703.p](http://www.alabmed.com/uploadfile/2014/0515/20140515070230703.pdf)**  
47 **df on 25 July 2017.**  
48  
49  
50  
51  
52 53. Shekelle PG, Woolf SH, Eccles M, Grimshaw J: **Developing**  
53 **guidelines.** *BMJ (Clinical research ed)* 1999, **318(7183):593-596.**  
54  
55  
56 54. Multidisciplinary Expert Task Force on Hyperuricemia and Related  
57 Diseases: **Chinese Multidisciplinary Expert Consensus on the**  
58 **Diagnosis and Treatment of Hyperuricemia and Related Diseases.**  
59  
60

- 1  
2  
3  
4  
5  
6  
7  
8  
9  
10  
11  
12  
13  
14  
15  
16  
17  
18  
19  
20  
21  
22  
23  
24  
25  
26  
27  
28  
29  
30  
31  
32  
33  
34  
35  
36  
37  
38  
39  
40  
41  
42  
43  
44  
45  
46  
47  
48  
49  
50  
51  
52  
53  
54  
55  
56  
57  
58  
59  
60
- Chin Med J (Engl)* 2017, **130**(20):2473-2488.
55. Yu KH, Chen DY, Chen JH, Chen SY, Chen SM, Cheng TT, Hsieh SC, Hsieh TY, Hsu PF, Kuo CF, et al: **Management of gout and hyperuricemia: Multidisciplinary consensus in Taiwan.** *Int J Rheum Dis* 2018, **21**(4):772-787.
56. Nuki G: **An appraisal of the 2012 American College of Rheumatology Guidelines for the Management of Gout.** *Current opinion in rheumatology* 2014, **26**(2):152-161.
57. Wang D, Yu Y, Chen Y, Yang N, Zhang H, Wang C, Wang Q, Wang X, Zeng X, Estill J: **Assessing the Quality of Global Clinical Practice Guidelines on Gout Using AGREE II Instrument.** *J Clin Rheumatol* 2018.
58. Zhang W, Doherty M, Bardin T, Pascual E, Barskova V, Conaghan P, Gerster J, Jacobs J, Leeb B, Liote F *et al*: **EULAR evidence based recommendations for gout. Part II: Management. Report of a task force of the EULAR Standing Committee for International Clinical Studies Including Therapeutics (ESCSIT).** *Annals of the rheumatic diseases* 2006, **65**(10):1312-1324.
59. Holmer HK, Ogden LA, Burda BU, Norris SL: **Quality of clinical practice guidelines for glycemic control in type 2 diabetes mellitus.** *PloS one* 2013, **8**(4):e58625.
60. Wu CM, Wu AM, Young BK, Wu DJ, Margo CE, Greenberg PB: **An appraisal of clinical practice guidelines for diabetic retinopathy.** *American Journal of Medical Quality* 2016, **31**(4):370-375.
61. Fang Y, Yao L, Sun J, Zhang J, Li Y, Yang R, Yang K, Tian L: **Appraisal of clinical practice guidelines on the management of hypothyroidism in pregnancy using the Appraisal of Guidelines for Research and Evaluation II instrument.** *Endocrine* 2018:1-11.
62. Hazlewood GS, Akhavan P, Schieir O, Marshall D, Tomlinson G, Bykerk V, Bombardier C: **Adding a “GRADE” to the quality appraisal**

- 1  
2  
3  
4 **of rheumatoid arthritis guidelines identifies limitations beyond**  
5 **AGREE-II.** *Journal of clinical epidemiology* 2014, **67**(11):1274-1285.
- 6  
7  
8 63. Palmowski Y, Buttgereit T, Dejacó C, Bijlsma JW, Matteson EL,  
9 Voshaar M, Boers M, Buttgereit F: **“Official View” on Glucocorticoids**  
10 **in Rheumatoid Arthritis: A Systematic Review of International**  
11 **Guidelines and Consensus Statements.** *Arthritis care & research*  
12 2017, **69**(8):1134-1141.
- 13  
14  
15  
16  
17  
18 64. Tunnicliffe DJ, Singh-Grewal D, Kim S, Craig JC, Tong A: **Diagnosis,**  
19 **monitoring, and treatment of systemic lupus erythematosus: a**  
20 **systematic review of clinical practice guidelines.** *Arthritis care &*  
21 *research* 2015, **67**(10):1440-1452.
- 22  
23  
24  
25  
26 65. Alonso-Coello P, Irfan A, Solà I, Gich I, Delgado-Noguera M, Rigau D,  
27 Tort S, Bonfill X, Burgers J, Schunemann H: **The quality of clinical**  
28 **practice guidelines over the last two decades: a systematic review**  
29 **of guideline appraisal studies.** *Qual Saf Health Care* 2010,  
30 **19**(6):e58-e58.
- 31  
32  
33  
34  
35  
36 66. Devroey D, Vantomme K, Betz W, Vandevoorde J, Kartounian J: **A**  
37 **review of the treatment guidelines on the management of low**  
38 **levels of high-density lipoprotein cholesterol.** *Cardiology* 2004,  
39 **102**(2):61-66.
- 40  
41  
42  
43 67. Gavriilidis P, Roberts KJ, Askari A, Sutcliffe RP, Liu P-H, Hidalgo E,  
44 Compagnon P, Lim C, Azoulay D: **Evaluation of the current**  
45 **guidelines for resection of hepatocellular carcinoma using the**  
46 **Appraisal of Guidelines for Research and Evaluation II instrument.**  
47 *Journal of hepatology* 2017, **67**(5):991-998.
- 48  
49  
50  
51  
52  
53 68. Jutkowitz E, Dubreuil M, Lu N, Kuntz KM, Choi HK: **The**  
54 **cost-effectiveness of HLA-B\*5801 screening to guide initial**  
55 **urate-lowering therapy for gout in the United States.** *Semin Arthritis*  
56 *Rheum* 2017, **46**(5):594-600.
- 57  
58  
59  
60

- 1  
2  
3  
4 69. Plumpton CO, Alfirevic A, Pirmohamed M, Hughes DA: **Cost**  
5 **effectiveness analysis of HLA-B\*58:01 genotyping prior to**  
6 **initiation of allopurinol for gout.** *Rheumatology (Oxford)* 2017,  
7 **56(10):1729-1739.**  
8  
9  
10  
11 70. Li T, Vedula SS, Scherer R, Dickersin K: **What comparative**  
12 **effectiveness research is needed? A framework for using**  
13 **guidelines and systematic reviews to identify evidence gaps and**  
14 **research priorities.** *Annals of internal medicine* 2012, **156(5):367-377.**  
15  
16  
17  
18 71. Brosseau L, Rahman P, Poitras S, Toupin-April K, Paterson G, Smith C,  
19 King J, Casimiro L, De Angelis G, Loew L: **A systematic critical**  
20 **appraisal of non-pharmacological management of rheumatoid**  
21 **arthritis with appraisal of guidelines for research and evaluation II.**  
22 *PloS one* 2014, **9(5):e95369.**  
23  
24  
25  
26  
27  
28 72. Watine J, Friedberg B, Nagy E, Onody R, Oosterhuis W, Bunting PS,  
29 Charet J-C, Horvath AR: **Conflict between guideline methodologic**  
30 **quality and recommendation validity: a potential problem for**  
31 **practitioners.** *Clinical chemistry* 2006, **52(1):65-72.**  
32  
33  
34  
35  
36  
37  
38  
39  
40  
41  
42  
43  
44  
45  
46  
47  
48  
49  
50  
51  
52  
53  
54  
55  
56  
57  
58  
59  
60

## TABLES AND FIGURES

**Table 1. Characteristics of included guidelines and consensus statements**

3e: Evidence, Expertise, Exchange; ACP: American College of Physicians; ACR: American College of Rheumatology; AMM: Academy of Medicine of Malaysia; ASCR: American Society of Clinical Rheumatologists; CS: consensus statement; CVD: cardiovascular diseases; ER: external review; EULAR: European League Against Rheumatism; LOE: level of evidence; MOH: Ministry of Health Malaysia; MSR: Malaysian Society of Rheumatology; Multi: multidisciplinary development group; NG: not given; NIAMS: National Institute of Arthritis and Musculoskeletal and Skin Diseases; NIH: National Institutes of Health; Phy: physicians; Pt: patients; Rheu: rheumatologists; SLR: systematic literature review; SOR: strength of recommendation.

| Document                     | Issuing organization                | Year of publication | Country      | Funding body                  | Target population       | Target audience | Guideline development | Guideline review | Guideline update    | Evidence base | LOE | SOR |
|------------------------------|-------------------------------------|---------------------|--------------|-------------------------------|-------------------------|-----------------|-----------------------|------------------|---------------------|---------------|-----|-----|
| <b>Guidelines</b>            |                                     |                     |              |                               |                         |                 |                       |                  |                     |               |     |     |
| <b>SAMA_2003 [51]</b>        | South African Medical Association   | 2003                | South Africa | Pharmaceutical company        | Gout                    | Phy             | Multi                 | ER               | Intermittent        | NG            | -   | -   |
| <b>EULAR_2006 [18]</b>       | EULAR                               | 2006                | Europe       | EULAR                         | Gout                    | NG              | Rheu                  | NG               | NG                  | SLR           | +   | +   |
| <b>MOH_MSR_AMM_2008 [49]</b> | MOH, MSR, AMM                       | 2008                | Malaysia     | Pharmaceutical company        | Adults (>16y) with gout | Phy             | Multi                 | ER               | 2012 or sooner      | SLR           | +   | +   |
| <b>PRA_2008 [50]</b>         | Philippine Rheumatology Association | 2008                | Philippine   | NG                            | Gout                    | Phy             | NG                    | NG               | Three or more years | SLR           | +   | +   |
| <b>UTAustin_2009 [52]</b>    | University of Texas at Austin       | 2009                | US           | University of Texas at Austin | Adults with gout        | Phy             | NG                    | ER               | NG                  | SLR           | +   | +   |
| <b>EULAR_2011 [17]</b>       | EULAR                               | 2011                | Multination  | Pharmaceutical company, ASCR  | Gout                    | Phy             | Multi                 | NG               | NG                  | SLR           | +   | +   |

|                             |                                                      |      |               |                        |                                     |                     |       |    |                 |     |   |   |
|-----------------------------|------------------------------------------------------|------|---------------|------------------------|-------------------------------------|---------------------|-------|----|-----------------|-----|---|---|
| <b>JSGNAM_2011 [48]</b>     | Japanese Society of Gout and Nucleic Acid Metabolism | 2011 | Japan         | NG                     | Hyperuricemia or gout               | NG                  | NG    | ER | NG              | SLR | + | + |
| <b>ACR_2012 [14, 15]</b>    | ACR                                                  | 2012 | US            | ACR, NIAMS, NIH        | Gout                                | Phy                 | Multi | NG | Intermittent    | SLR | + | - |
| <b>SER_2013 [46]</b>        | Spanish Society of Rheumatology                      | 2013 | Spain         | Pharmaceutical company | Gout                                | Phy                 | Multi | ER | Four years      | SLR | + | + |
| <b>SIR_2013 [45]</b>        | Italian Society of Rheumatology                      | 2013 | Italy         | NG                     | Gout                                | Phy                 | Multi | NG | NG              | SLR | + | + |
| <b>FMOH_2014 [44]</b>       | Federal Ministry of Health (Nigeria)                 | 2014 | Nigeria       | NG                     | Gout                                | Phy, Pts in Nigeria | Multi | NG | NG              | NG  | - | - |
| <b>CRA_2016 [41]</b>        | Chinese Rheumatology Association                     | 2016 | China         | NG                     | Gout in China                       | Phy                 | Multi | NG | NG              | SLR | + | + |
| <b>EULAR_2016 [16]</b>      | EULAR                                                | 2016 | Europe        | NG                     | Gout                                | Phy, Pts            | Multi | ER | Intermittent    | SLR | + | + |
| <b>TRA_2016 [38]</b>        | Taiwan Rheumatology Association                      | 2016 | Taiwan, China | NG                     | Hyperuricemia or gout               | Phy, Pts            | Multi | NG | NG              | NG  | - | - |
| <b>ACP_2017 [19, 20]</b>    | ACP                                                  | 2017 | US            | ACP                    | Acute and recurrent gout            | Phy                 | NG    | ER | Five years      | SLR | + | + |
| <b>BSR_2017 [21]</b>        | The British Society for Rheumatology                 | 2017 | UK            | No specific funding.   | Gout in the UK                      | Phy                 | Multi | ER | Planned in 2020 | SLR | + | + |
| <b>Consensus statements</b> |                                                      |      |               |                        |                                     |                     |       |    |                 |     |   |   |
| <b>CCCP_2012 [47]</b>       | Chinese College of Cardiovascular Physicians         | 2012 | China         | NG                     | Asymptomatic hyperuricemia with CVD | NG                  | NG    | NG | NG              | CS  | - | - |
| <b>3e_2013 [36]</b>         | 3e Initiative                                        | 2013 | Multination   | Pharmaceutical company | Gout                                | NG                  | Rheu  | NG | NG              | SLR | + | + |
| <b>CSE_2013 [37]</b>        | Chinese Society of Endocrinology                     | 2013 | China         | NG                     | Hyperuricemia or gout               | NG                  | NG    | NG | NG              | CS  | - | - |
| <b>3e_PT_2014 [40]</b>      | Portuguese 3e Initiative                             | 2014 | Portugal      | NG                     | Gout in Portuguese                  | NG                  | Rheu  | NG | NG              | SLR | + | + |
| <b>3e_AU_NZ_2015 [43]</b>   | Australian and New Zealand 3e Initiative             | 2015 | Multination   | NG                     | Gout                                | NG                  | Rheu  | NG | NG              | SLR | + | + |

1  
2  
3  
4  
5  
6  
7  
8  
9  
10  
11  
12  
13  
14  
15  
16  
17  
18  
19  
20  
21  
22  
23  
24  
25  
26  
27  
28  
29  
30  
31  
32  
33  
34  
35  
36  
37  
38  
39  
40  
41  
42  
43  
44  
45  
46

|                            |                                                                                        |      |             |                        |               |     |       |    |              |     |   |   |
|----------------------------|----------------------------------------------------------------------------------------|------|-------------|------------------------|---------------|-----|-------|----|--------------|-----|---|---|
| <b>ACR_EULAR_2015 [42]</b> | ACR/EULAR                                                                              | 2015 | Multination | ACR, EULAR             | Gout          | NG  | NG    | ER | Intermittent | SLR | - | - |
| <b>T2T_2016 [39]</b>       | NG                                                                                     | 2016 | Multination | Pharmaceutical company | Gout          | NG  | Rheu  | ER | NG           | SLR | + | + |
| <b>CRA_multi_2017 [22]</b> | Chinese multi-disciplinary expert task force on hyperuricemia and its related diseases | 2017 | China       | NG                     | Hyperuricemia | Phy | Multi | NG | NG           | CS  | - | - |



1  
2  
3  
4  
5 **Figure 1. Flow diagram for literature search**

6 NGC, National Guideline Clearinghouse; GIN, Guidelines International Network; NICE, National Institute for Health and Care  
7 Excellence; NHS, National Health Service; SIGN, Scottish Intercollegiate Guidelines Network; GAIN, Guidelines and Audit  
8 Implementation Network; TRIP, Turning Research Into Practice Database; CBM, Chinese Biomedical Literature Database.  
9  
10  
11  
12  
13  
14  
15  
16  
17  
18  
19  
20  
21  
22  
23  
24  
25  
26  
27  
28  
29  
30  
31  
32  
33  
34  
35  
36  
37  
38  
39  
40  
41  
42  
43  
44  
45  
46

For peer review only

**Figure 2. Standardized domain scores for each guidance document**

3e: Evidence, Expertise, Exchange Initiative; 3e\_AU\_NZ: Australian and New Zealand 3e Initiative; 3e\_PT: Portuguese 3e Initiative; ACP: American College of Physicians; ACR: American College of Rheumatology; AMM: Academy of Medicine of Malaysia; ASCR: American Society of Clinical Rheumatologists; BSR: British Society for Rheumatology; CCCP: Chinese College of Cardiovascular Physicians; CRA: Chinese Rheumatology Association; CRA\_multi: Chinese multi-disciplinary expert task force on hyperuricemia and its related diseases; CSE: Chinese Society of Endocrinology; EULAR: European League Against Rheumatism; FMOH: Federal Ministry of Health (Nigeria); IQR: interquartile range; JSGNAM: Japanese Society of Gout and Nucleic Acid Metabolism; MOH: Ministry of Health Malaysia; MSR: Malaysian Society of Rheumatology; NIAMS: National Institute of Arthritis and Musculoskeletal and Skin Diseases; NIH: National Institutes of Health; PRA: Philippine Rheumatology Association; SAMA: South African Medical Association; SER: Spanish Society of Rheumatology; SIR: Italian Society of Rheumatology; T2T: Treat-to-target recommendations; TRA: Taiwan Rheumatology Association; UTAustin: University of Texas at Austin.

### Figure 3. Summary of key recommendations for the diagnosis and treatment of gout and hyperuricemia

3e: Evidence, Expertise, Exchange Initiative; 3e\_AU\_NZ: Australian and New Zealand 3e Initiative; 3e\_PT: Portuguese 3e Initiative; ACP: American College of Physicians; ACR: American College of Rheumatology; AMM: Academy of Medicine of Malaysia; ASCR: American Society of Clinical Rheumatologists; BSR: British Society for Rheumatology; CCCP: Chinese College of Cardiovascular Physicians; CRA: Chinese Rheumatology Association; CRA\_multi: Chinese multi-disciplinary expert task force on hyperuricemia and its related diseases; CSE: Chinese Society of Endocrinology; EULAR: European League Against Rheumatism; FMOH: Federal Ministry of Health (Nigeria); JSGNAM: Japanese Society of Gout and Nucleic Acid Metabolism; MOH: Ministry of Health Malaysia; MSR: Malaysian Society of Rheumatology; NIAMS: National Institute of Arthritis and Musculoskeletal and Skin Diseases; NIH: National Institutes of Health; PRA: Philippine Rheumatology Association; SAMA: South African Medical Association; SER: Spanish Society of Rheumatology; SIR: Italian Society of Rheumatology; SUA: serum uric acid; T2T: Treat-to-target recommendations; TRA: Taiwan Rheumatology Association; UTAustin: University of Texas at Austin.

### Figure 1 Flow diagram for literature search

NGC, National Guideline Clearinghouse; GIN, Guidelines International Network; NICE, National Institute for Health and Care Excellence; NHS, National Health Service; SIGN, Scottish Intercollegiate Guidelines Network; GAIN, Guidelines and Audit Implementation Network; TRIP, Turning Research Into Practice Database; CBM, Chinese Biomedical Literature Database.

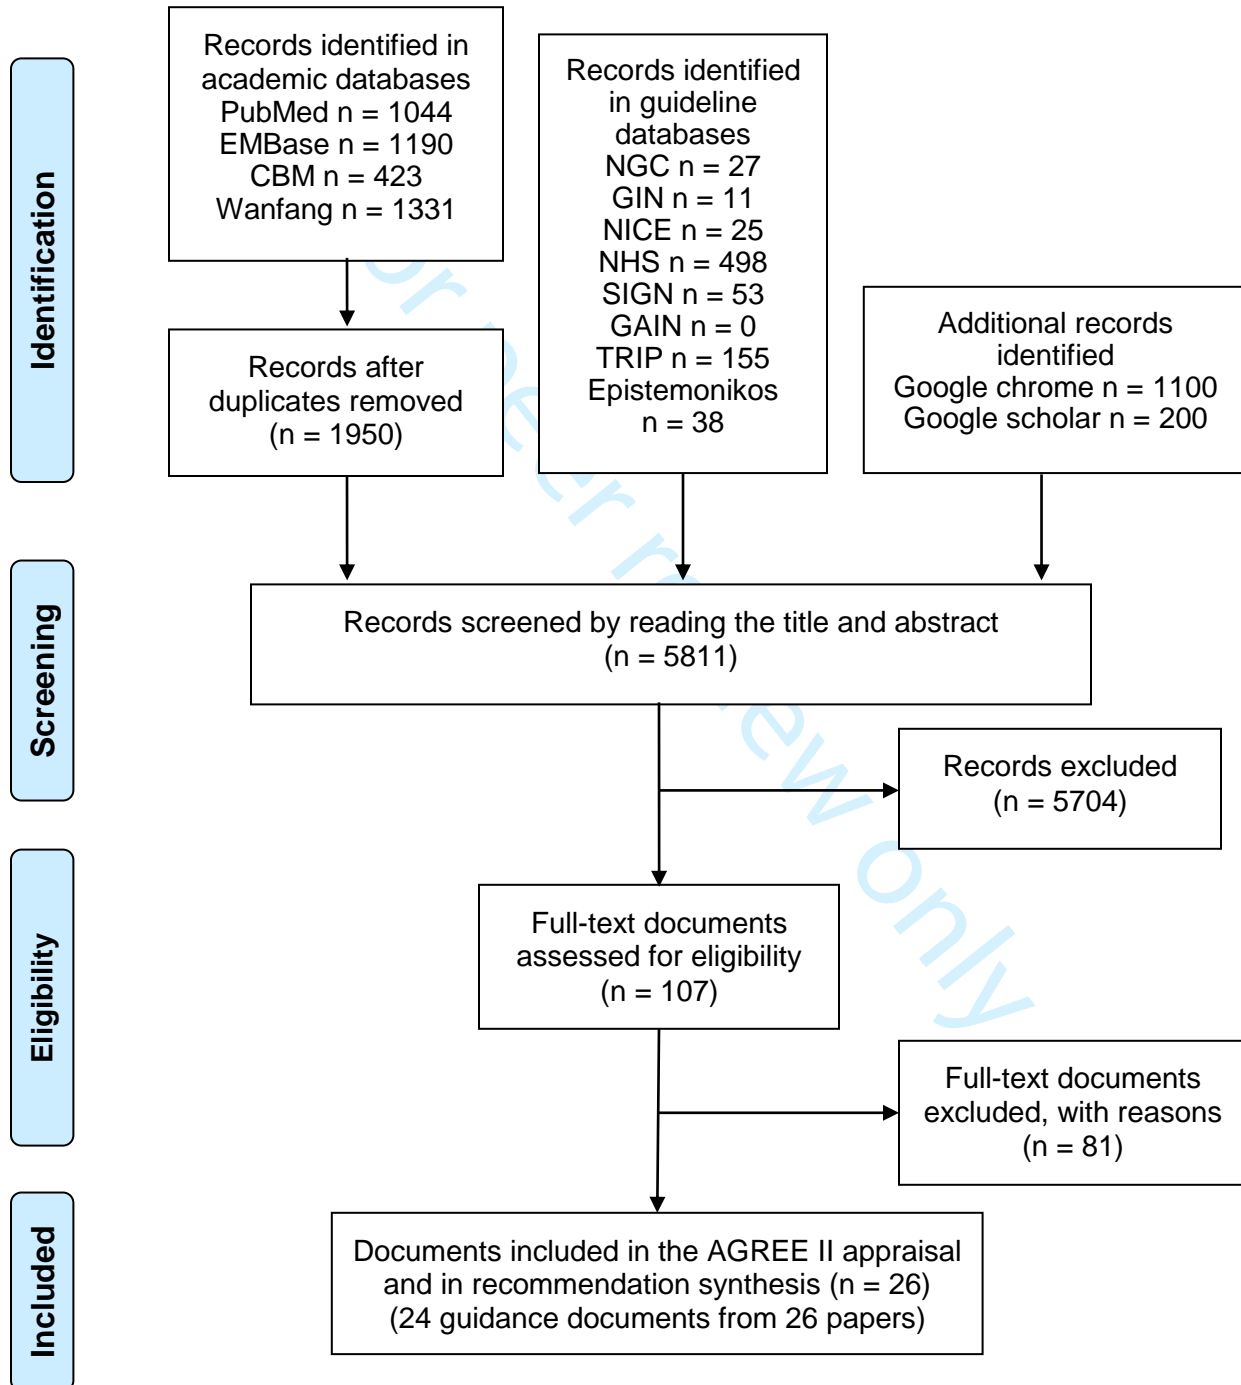

From: Moher D, Liberati A, Tetzlaff J, Altman DG, The PRISMA Group (2009). Preferred Reporting Items for Systematic Reviews and Meta-Analyses: The PRISMA Statement. PLoS Med 6(7): e1000097. doi:10.1371/journal.pmed1000097

For more information, visit [www.prisma-statement.org](http://www.prisma-statement.org).

For peer review only - <http://bmjopen.bmj.com/site/about/guidelines.xhtml>



|                                                                                   | Reference contents                                  | SAMA_2003 (51) | EULAR_2009 (16) | MOH_MSR_AMM_2008 (49) | PRA_2008 (60) | UTAustin_2009 (62) | EULAR_2011 (17) | JSGNAM_2011 (48) | ACR_2012 (14, 15) | CCCP_2012 (47) | 3e_2013 (38) | CSE_2013 (37) | SER_2013 (46) | SIR_2013 (45) | 3e_PT_2014 (40) | FMOH_2014 (44) | 3e_AU_NZ_2015 (43) | ACR_EULAR_2015 (42) | CRA_2016 (41) | EULAR_2016 (18) | T2T_2016 (39) | TRA_2016 (38) | ACP_2017 (19, 20) | BSR_2017 (21) | CRA_multi_2017 (22) |  |
|-----------------------------------------------------------------------------------|-----------------------------------------------------|----------------|-----------------|-----------------------|---------------|--------------------|-----------------|------------------|-------------------|----------------|--------------|---------------|---------------|---------------|-----------------|----------------|--------------------|---------------------|---------------|-----------------|---------------|---------------|-------------------|---------------|---------------------|--|
| <b>Diagnosis and Monitoring</b>                                                   |                                                     |                |                 |                       |               |                    |                 |                  |                   |                |              |               |               |               |                 |                |                    |                     |               |                 |               |               |                   |               |                     |  |
| Definition of gout                                                                | Yes                                                 |                |                 |                       |               |                    |                 |                  |                   |                |              |               |               |               |                 |                |                    |                     |               |                 |               |               |                   |               |                     |  |
| _Clinical manifestations                                                          | Yes                                                 |                |                 |                       |               |                    |                 |                  |                   |                |              |               |               |               |                 |                |                    |                     |               |                 |               |               |                   |               |                     |  |
| _Laboratory results                                                               | Yes                                                 |                |                 |                       |               |                    |                 |                  |                   |                |              |               |               |               |                 |                |                    |                     |               |                 |               |               |                   |               |                     |  |
| _Imaging results                                                                  | Yes                                                 |                |                 |                       |               |                    |                 |                  |                   |                |              |               |               |               |                 |                |                    |                     |               |                 |               |               |                   |               |                     |  |
| _MSU crystal detection as definitive diagnosis                                    | Yes                                                 |                |                 |                       |               |                    |                 |                  |                   |                |              |               |               |               |                 |                |                    |                     |               |                 |               |               |                   |               |                     |  |
| _Is urate deposits clearance monitored by imaging?                                | No                                                  |                |                 |                       |               |                    |                 |                  |                   |                |              |               |               |               |                 |                |                    |                     |               |                 |               |               |                   |               |                     |  |
| _Is the timing to assess urate deposits with imaging provided?                    | No                                                  |                |                 |                       |               |                    |                 |                  |                   |                |              |               |               |               |                 |                |                    |                     |               |                 |               |               |                   |               |                     |  |
| _Is SUA cut-off provided for hyperuricemia?                                       | Yes                                                 |                |                 |                       |               |                    |                 |                  |                   |                |              |               |               |               |                 |                |                    |                     |               |                 |               |               |                   |               |                     |  |
| _All gender                                                                       | 420 µmol/L or 7.0 mg/dL                             |                |                 |                       |               |                    |                 |                  |                   |                |              |               |               |               |                 |                |                    |                     |               |                 |               |               |                   |               |                     |  |
| _Female                                                                           | 360 µmol/L or 6.0 mg/dL                             |                |                 |                       |               |                    |                 |                  |                   |                |              |               |               |               |                 |                |                    |                     |               |                 |               |               |                   |               |                     |  |
| _Male                                                                             | 420 µmol/L or 7.0 mg/dL                             |                |                 |                       |               |                    |                 |                  |                   |                |              |               |               |               |                 |                |                    |                     |               |                 |               |               |                   |               |                     |  |
| _Definition of asymptomatic hyperuricemia                                         | Yes                                                 |                |                 |                       |               |                    |                 |                  |                   |                |              |               |               |               |                 |                |                    |                     |               |                 |               |               |                   |               |                     |  |
| _Gout flare                                                                       | Yes                                                 |                |                 |                       |               |                    |                 |                  |                   |                |              |               |               |               |                 |                |                    |                     |               |                 |               |               |                   |               |                     |  |
| _Tophi                                                                            | Yes                                                 |                |                 |                       |               |                    |                 |                  |                   |                |              |               |               |               |                 |                |                    |                     |               |                 |               |               |                   |               |                     |  |
| _Other medical conditions                                                         | Yes                                                 |                |                 |                       |               |                    |                 |                  |                   |                |              |               |               |               |                 |                |                    |                     |               |                 |               |               |                   |               |                     |  |
| <b>Treatment for Tophi</b>                                                        |                                                     |                |                 |                       |               |                    |                 |                  |                   |                |              |               |               |               |                 |                |                    |                     |               |                 |               |               |                   |               |                     |  |
| Is surgery recommended?                                                           | Yes                                                 |                |                 |                       |               |                    |                 |                  |                   |                |              |               |               |               |                 |                |                    |                     |               |                 |               |               |                   |               |                     |  |
| _Indications for surgery                                                          | Provided                                            |                |                 |                       |               |                    |                 |                  |                   |                |              |               |               |               |                 |                |                    |                     |               |                 |               |               |                   |               |                     |  |
| _Nerve compression                                                                | Yes                                                 |                |                 |                       |               |                    |                 |                  |                   |                |              |               |               |               |                 |                |                    |                     |               |                 |               |               |                   |               |                     |  |
| _Infection                                                                        | Yes                                                 |                |                 |                       |               |                    |                 |                  |                   |                |              |               |               |               |                 |                |                    |                     |               |                 |               |               |                   |               |                     |  |
| _Mechanical impingement                                                           | Yes                                                 |                |                 |                       |               |                    |                 |                  |                   |                |              |               |               |               |                 |                |                    |                     |               |                 |               |               |                   |               |                     |  |
| _Loss of mobility                                                                 | Yes                                                 |                |                 |                       |               |                    |                 |                  |                   |                |              |               |               |               |                 |                |                    |                     |               |                 |               |               |                   |               |                     |  |
| _Severe pain                                                                      | Yes                                                 |                |                 |                       |               |                    |                 |                  |                   |                |              |               |               |               |                 |                |                    |                     |               |                 |               |               |                   |               |                     |  |
| _Tophaceous ulcer                                                                 | Yes                                                 |                |                 |                       |               |                    |                 |                  |                   |                |              |               |               |               |                 |                |                    |                     |               |                 |               |               |                   |               |                     |  |
| _Others                                                                           | Yes                                                 |                |                 |                       |               |                    |                 |                  |                   |                |              |               |               |               |                 |                |                    |                     |               |                 |               |               |                   |               |                     |  |
| _What are the risks of surgery?                                                   | Wound healing                                       |                |                 |                       |               |                    |                 |                  |                   |                |              |               |               |               |                 |                |                    |                     |               |                 |               |               |                   |               |                     |  |
| _Is long-term serum urate lowering treatment recommended?                         | Yes                                                 |                |                 |                       |               |                    |                 |                  |                   |                |              |               |               |               |                 |                |                    |                     |               |                 |               |               |                   |               |                     |  |
| _Is any pharmacological treatment explicitly recommended?                         | Pegloticase                                         |                |                 |                       |               |                    |                 |                  |                   |                |              |               |               |               |                 |                |                    |                     |               |                 |               |               |                   |               |                     |  |
| <b>Treatment for Acute Attack</b>                                                 |                                                     |                |                 |                       |               |                    |                 |                  |                   |                |              |               |               |               |                 |                |                    |                     |               |                 |               |               |                   |               |                     |  |
| First line pharmacological treatment option                                       | Provided                                            |                |                 |                       |               |                    |                 |                  |                   |                |              |               |               |               |                 |                |                    |                     |               |                 |               |               |                   |               |                     |  |
| _NSAIDs                                                                           | Yes                                                 |                |                 |                       |               |                    |                 |                  |                   |                |              |               |               |               |                 |                |                    |                     |               |                 |               |               |                   |               |                     |  |
| _Colchicine                                                                       | Yes                                                 |                |                 |                       |               |                    |                 |                  |                   |                |              |               |               |               |                 |                |                    |                     |               |                 |               |               |                   |               |                     |  |
| _Steroids                                                                         | Yes                                                 |                |                 |                       |               |                    |                 |                  |                   |                |              |               |               |               |                 |                |                    |                     |               |                 |               |               |                   |               |                     |  |
| _What is the dosage of colchicine recommended?                                    | 1.2 mg loading dose followed by 0.6 mg 1 hour later |                |                 |                       |               |                    |                 |                  |                   |                |              |               |               |               |                 |                |                    |                     |               |                 |               |               |                   |               |                     |  |
| _Is intra-articular steroids recommended?                                         | Yes                                                 |                |                 |                       |               |                    |                 |                  |                   |                |              |               |               |               |                 |                |                    |                     |               |                 |               |               |                   |               |                     |  |
| _Indications for intra-articular steroids                                         | Provided                                            |                |                 |                       |               |                    |                 |                  |                   |                |              |               |               |               |                 |                |                    |                     |               |                 |               |               |                   |               |                     |  |
| _Involvement of 1-2 major joints                                                  | Yes                                                 |                |                 |                       |               |                    |                 |                  |                   |                |              |               |               |               |                 |                |                    |                     |               |                 |               |               |                   |               |                     |  |
| _Contraindicated to NSAIDs or colchicine                                          | Yes                                                 |                |                 |                       |               |                    |                 |                  |                   |                |              |               |               |               |                 |                |                    |                     |               |                 |               |               |                   |               |                     |  |
| _Which line of option is intra-articular steroids recommended to be?              | First                                               |                |                 |                       |               |                    |                 |                  |                   |                |              |               |               |               |                 |                |                    |                     |               |                 |               |               |                   |               |                     |  |
| _Is systemic steroids recommended?                                                | Yes                                                 |                |                 |                       |               |                    |                 |                  |                   |                |              |               |               |               |                 |                |                    |                     |               |                 |               |               |                   |               |                     |  |
| _What are the indications for systemic steroids?                                  | Contraindicated to colchicine or NSAIDs             |                |                 |                       |               |                    |                 |                  |                   |                |              |               |               |               |                 |                |                    |                     |               |                 |               |               |                   |               |                     |  |
| _Which line of option is systemic steroids recommended to be?                     | First                                               |                |                 |                       |               |                    |                 |                  |                   |                |              |               |               |               |                 |                |                    |                     |               |                 |               |               |                   |               |                     |  |
| <b>Treatment for Hyperuricemia</b>                                                |                                                     |                |                 |                       |               |                    |                 |                  |                   |                |              |               |               |               |                 |                |                    |                     |               |                 |               |               |                   |               |                     |  |
| Is upper limit for the target SUA provided?                                       | Yes                                                 |                |                 |                       |               |                    |                 |                  |                   |                |              |               |               |               |                 |                |                    |                     |               |                 |               |               |                   |               |                     |  |
| _General target                                                                   | 360 µmol/L or 6.0 mg/dL                             |                |                 |                       |               |                    |                 |                  |                   |                |              |               |               |               |                 |                |                    |                     |               |                 |               |               |                   |               |                     |  |
| _Target for severe cases                                                          | 300 µmol/L or 5.0 mg/dL                             |                |                 |                       |               |                    |                 |                  |                   |                |              |               |               |               |                 |                |                    |                     |               |                 |               |               |                   |               |                     |  |
| _Lower limit for the target SUA                                                   | 180 µmol/L or 3.0 mg/dL                             |                |                 |                       |               |                    |                 |                  |                   |                |              |               |               |               |                 |                |                    |                     |               |                 |               |               |                   |               |                     |  |
| _Is drinking water explicitly recommended as a treatment?                         | Yes                                                 |                |                 |                       |               |                    |                 |                  |                   |                |              |               |               |               |                 |                |                    |                     |               |                 |               |               |                   |               |                     |  |
| _Is urine alkalinization recommended?                                             | Yes                                                 |                |                 |                       |               |                    |                 |                  |                   |                |              |               |               |               |                 |                |                    |                     |               |                 |               |               |                   |               |                     |  |
| _Indications for ULT                                                              | Yes                                                 |                |                 |                       |               |                    |                 |                  |                   |                |              |               |               |               |                 |                |                    |                     |               |                 |               |               |                   |               |                     |  |
| _Recurrent attacks                                                                | Yes                                                 |                |                 |                       |               |                    |                 |                  |                   |                |              |               |               |               |                 |                |                    |                     |               |                 |               |               |                   |               |                     |  |
| _Tophi                                                                            | Yes                                                 |                |                 |                       |               |                    |                 |                  |                   |                |              |               |               |               |                 |                |                    |                     |               |                 |               |               |                   |               |                     |  |
| _Urate nephrolithiasis                                                            | Yes                                                 |                |                 |                       |               |                    |                 |                  |                   |                |              |               |               |               |                 |                |                    |                     |               |                 |               |               |                   |               |                     |  |
| _Arthropathy                                                                      | Yes                                                 |                |                 |                       |               |                    |                 |                  |                   |                |              |               |               |               |                 |                |                    |                     |               |                 |               |               |                   |               |                     |  |
| _Combidities                                                                      | Yes                                                 |                |                 |                       |               |                    |                 |                  |                   |                |              |               |               |               |                 |                |                    |                     |               |                 |               |               |                   |               |                     |  |
| _Others                                                                           | Yes                                                 |                |                 |                       |               |                    |                 |                  |                   |                |              |               |               |               |                 |                |                    |                     |               |                 |               |               |                   |               |                     |  |
| _Should ULT be initiated during or after an acute attack?                         | After an attack                                     |                |                 |                       |               |                    |                 |                  |                   |                |              |               |               |               |                 |                |                    |                     |               |                 |               |               |                   |               |                     |  |
| _What is the first line ULT drug option?                                          | Allopurinol                                         |                |                 |                       |               |                    |                 |                  |                   |                |              |               |               |               |                 |                |                    |                     |               |                 |               |               |                   |               |                     |  |
| _What is the second line ULT drug option?                                         | Febuxostat or Probenecid                            |                |                 |                       |               |                    |                 |                  |                   |                |              |               |               |               |                 |                |                    |                     |               |                 |               |               |                   |               |                     |  |
| _What is the maximum dosage of Allopurinol recommended per day?                   | 600 mg/d                                            |                |                 |                       |               |                    |                 |                  |                   |                |              |               |               |               |                 |                |                    |                     |               |                 |               |               |                   |               |                     |  |
| _What is the cut off for renal function to initiate Allopurinol dose adjustment?  | eGFR 130 ml/min/1.73m <sup>2</sup>                  |                |                 |                       |               |                    |                 |                  |                   |                |              |               |               |               |                 |                |                    |                     |               |                 |               |               |                   |               |                     |  |
| _What is the starting dose for Allopurinol in patient with normal renal function? | 100 mg per day                                      |                |                 |                       |               |                    |                 |                  |                   |                |              |               |               |               |                 |                |                    |                     |               |                 |               |               |                   |               |                     |  |
| _Is HLA-B*5801 gene screening recommended for allopurinol use?                    | Yes                                                 |                |                 |                       |               |                    |                 |                  |                   |                |              |               |               |               |                 |                |                    |                     |               |                 |               |               |                   |               |                     |  |
| _Should prophylaxis be given with ULT?                                            | Yes                                                 |                |                 |                       |               |                    |                 |                  |                   |                |              |               |               |               |                 |                |                    |                     |               |                 |               |               |                   |               |                     |  |
| _Should prophylaxis be given before initiating ULT?                               | Yes                                                 |                |                 |                       |               |                    |                 |                  |                   |                |              |               |               |               |                 |                |                    |                     |               |                 |               |               |                   |               |                     |  |
| _What is the duration for prophylaxis?                                            | 3-6 months                                          |                |                 |                       |               |                    |                 |                  |                   |                |              |               |               |               |                 |                |                    |                     |               |                 |               |               |                   |               |                     |  |
| _Is pharmacological ULT recommended for asymptomatic hyperuricemia?               | Yes                                                 |                |                 |                       |               |                    |                 |                  |                   |                |              |               |               |               |                 |                |                    |                     |               |                 |               |               |                   |               |                     |  |
| _Are comorbidities considered?                                                    | Yes                                                 |                |                 |                       |               |                    |                 |                  |                   |                |              |               |               |               |                 |                |                    |                     |               |                 |               |               |                   |               |                     |  |
| _What is the SUA cut-off?                                                         | 8.0-9.0 mg/dL                                       |                |                 |                       |               |                    |                 |                  |                   |                |              |               |               |               |                 |                |                    |                     |               |                 |               |               |                   |               |                     |  |

■ Consistent with the reference content  
■ Inconsistent with the reference content  
■ Partially consistent with the reference content  
■ Not given  
■ Not applicable

Figure 3. Summary of key recommendations for the diagnosis and treatment of gout and hyperuricemia<sup>3e</sup>: Evidence, Expertise, Exchange Initiative; 3e\_AU\_NZ: Australian and New Zealand 3e Initiative; 3e\_PT: Portuguese 3e Initiative; ACP: American College of Physicians; ACR: American College of Rheumatology; AMM: Academy of Medicine of Malaysia; ASCR: American Society of Clinical Rheumatologists; BSR: British Society for Rheumatology; CCCP: Chinese College of Cardiovascular Physicians; CRA: Chinese Rheumatology Association; CRA\_multi: Chinese multi-disciplinary expert task force on hyperuricemia and its related diseases; CSE: Chinese Society of Endocrinology; EULAR: European League Against Rheumatism; FMOH: Federal Ministry of Health (Nigeria); JSGNAM: Japanese Society of Gout and Nucleic Acid Metabolism; MOH: Ministry of Health Malaysia; MSR: Malaysian Society of Rheumatology; NIAMS: National Institute of Arthritis and Musculoskeletal and Skin Diseases; NIH: National Institutes of Health; PRA: Philippine Rheumatology Association; SAMA: South African Medical Association; SER: Spanish Society of Rheumatology; SIR: Italian Society of Rheumatology; SUA: serum uric acid; T2T: Treat-to-target recommendations; TRA: Taiwan Rheumatology Association; UTAustin: University of Texas at Austin.

## Supplementary Materials

Contents

Supplementary Table 1. Search strategy in PubMed

Supplementary Table 2. Search strategy in EMBASE using the OVID interface

Supplementary Table 3. Searches in guideline databases

Supplementary Table 4. Excluded studies and reasons for exclusion

Supplementary Table 5. Domain score for each included guidance document

Supplementary Table 6. Mean scores across reviewers for the individual AGREE II domain items

Supplementary Table 7. Scores for each individual AGREE II domain items by each reviewer

Supplementary Table 8. Summary of recommendations for the diagnosis of gout and hyperuricemia by included guidance documents

Supplementary Table 9. Summary of recommendations for the treatment of hyperuricemia by included guidance documents

Supplementary Table 10. Summary of recommendations for the treatment of acute gout by included guidance documents

Supplementary Table 11. Summary of recommendations for the treatment of tophi by included guidance documents

Supplementary Figure 1. Standardized domain scores by the year of publication

Supplementary File 1. Instructions for Guideline Appraisal Using the AGREE II Instrument

**Supplementary Table 1. Search strategy in PubMed**

|   |                                                                                           |
|---|-------------------------------------------------------------------------------------------|
| 1 | urate* OR uric acid OR gout OR hyperuricemia OR hyperuricaemia                            |
| 2 | guideline OR guideline* OR consensus OR policy OR polic* OR statement* OR recommendation* |
| 3 | 1 AND 2                                                                                   |

For peer review only



**Supplementary Table 2. Search strategy in EMBASE using the OVID interface**

|    |                                        |
|----|----------------------------------------|
| 1  | exp hyperuricemia/                     |
| 2  | exp gout/                              |
| 3  | exp uric acid/                         |
| 4  | exp urate/                             |
| 5  | gout.m_titl.                           |
| 6  | uric acid.m_titl.                      |
| 7  | urate\$.m_titl.                        |
| 8  | hyperuric?emia.m_titl.                 |
| 9  | 1 or 2 or 3 or 4 or 5 or 6 or 7 or 8   |
| 10 | exp practice guideline/                |
| 11 | guideline\$.m_titl.                    |
| 12 | consensus.m_titl.                      |
| 13 | position statement\$.m_titl.           |
| 14 | exp health care policy/ or exp policy/ |
| 15 | recommendation\$.m_titl.               |
| 16 | 10 or 11 or 12 or 13 or 14 or 15       |
| 17 | 9 and 16                               |

**Supplementary Table 3. Searches in guideline databases**

| Databases                                         | Date of search | Search strategy                                                                                                        | Results found | Full text screened | Included documents | URL                                                                                        |
|---------------------------------------------------|----------------|------------------------------------------------------------------------------------------------------------------------|---------------|--------------------|--------------------|--------------------------------------------------------------------------------------------|
| National Guideline Clearinghouse                  | 2017/07/24     | hyperuricaemia OR hyperuricemia OR gout                                                                                | 27            | 6                  | 4                  | <a href="http://www.guideline.gov">www.guideline.gov</a>                                   |
| Guidelines International Network                  | 2017/07/24     | hyperuricaemia OR hyperuricemia OR gout, Search mode: Guidelines                                                       | 11            | 5                  | 5                  | <a href="http://www.g-i-n.net">www.g-i-n.net</a>                                           |
| National Institute for Health and Care Excellence | 2017/07/24     | hyperuricaemia OR hyperuricemia OR gout                                                                                | 25            | 2                  | 0                  | <a href="http://www.nice.org.uk">www.nice.org.uk</a>                                       |
| National Health Service                           | 2017/07/24     | hyperuricaemia OR hyperuricemia OR gout, filter type: guidance and policy                                              | 498           | 5                  | 3                  | <a href="http://www.evidence.nhs.uk">www.evidence.nhs.uk</a>                               |
| Scottish Intercollegiate Guidelines Network       | 2017/07/24     | NA                                                                                                                     | 53            | 0                  | 0                  | <a href="http://www.sign.ac.uk/our-guidelines.html">www.sign.ac.uk/our-guidelines.html</a> |
| Guidelines and Audit Implementation Network       | 2017/07/24     | “hyperuricaemia” OR “hyperuricemia” OR “gout”                                                                          | 0             | 0                  | 0                  | <a href="http://rqia.org.uk/search-result">rqia.org.uk/search-result</a>                   |
| Turning Research Into Practice Database           | 2017/07/24     | hyperuricaemia OR hyperuricemia OR gout, filter: all secondary evidence                                                | 155           | 9                  | 3                  | <a href="http://www.tripdatabase.com">www.tripdatabase.com</a>                             |
| Epistemonikos database                            | 2017/07/24     | hyperuricaemia OR hyperuricemia OR gout, filter: Broad syntheses OR Structured summaries                               | 38            | 2                  | 1                  | <a href="http://www.epistemonikos.org">www.epistemonikos.org</a>                           |
| Chinese Biomedical Literature Database            | 2017/07/22     | [Original search term in Chinese] (hyperuricaemia OR gout) AND (guideline OR consensus OR statement OR recommendation) | 423           | 7                  | 5                  | <a href="http://202.115.54.56/index.jsp">202.115.54.56/index.jsp</a>                       |
| Wanfang Data                                      | 2017/07/22     | [Original search term in Chinese] (hyperuricaemia OR gout) AND (guideline OR consensus OR statement OR recommendation) | 1331          | 19                 | 4                  | <a href="http://www.wanfangdata.com.cn/">www.wanfangdata.com.cn/</a>                       |

Abbreviations: NA: Not applicable.

**Supplementary Table 4. Excluded studies and reasons for exclusion**

| <b>First author</b>    | <b>Year</b> | <b>Reason for exclusion</b>                                                              |
|------------------------|-------------|------------------------------------------------------------------------------------------|
| Wuthrich [68]          | 2016        | Review                                                                                   |
| Ceriotti [69]          | 2016        | Primary study                                                                            |
| Liote [70]             | 2016        | Editorial                                                                                |
| de Lautour [71]        | 2016        | Primary study                                                                            |
| de Lautour [72]        | 2014        | Conference abstract                                                                      |
| Dalbeth [73]           | 2015        | Review                                                                                   |
| Terslev [74]           | 2015        | Primary study                                                                            |
| Turk [75]              | 2016        | Not providing specific recommendations for hyperuricemia or gout                         |
| Stewart Coats [76]     | 2016        | Editorial                                                                                |
| Sullivan [77]          | 2015        | Review                                                                                   |
| Gutierrez [78]         | 2015        | Primary study                                                                            |
| Grainger [79]          | 2015        | Primary study                                                                            |
| Robinson [80]          | 2015        | Review                                                                                   |
| Chaudhary [81]         | 2013        | Review                                                                                   |
| Bakris [82]            | 2014        | Multimedia section                                                                       |
| Terkeltaub [83]        | 2013        | Review                                                                                   |
| Lyseng-Williamson [84] | 2013        | Review                                                                                   |
| Deodhar [85]           | 2013        | Review                                                                                   |
| Simao [86]             | 2012        | Review                                                                                   |
| Stamp [87]             | 2011        | Review                                                                                   |
| Jansen [88]            | 2010        | Not produced by related professional associations, institutes, societies, or communities |
| Grainger [89]          | 2009        | Review                                                                                   |
| Grainger [90]          | 2008        | Review                                                                                   |
| Dalbeth [91]           | 2007        | Review                                                                                   |
| Jordan [92]            | 2007        | Replaced by updated versions from the same organization                                  |
| Becker [93]            | 2007        | Not providing specific recommendations for hyperuricemia or gout                         |

|                                           |      |                                                                  |
|-------------------------------------------|------|------------------------------------------------------------------|
| Zhang [55]                                | 2006 | Replaced by updated versions from the same organization          |
| Caramia [94]                              | 2004 | Review                                                           |
| Terkeltaub [95]                           | 2003 | Case report                                                      |
| Cleland [96]                              | 1995 | Review                                                           |
| Hande [97]                                | 1984 | Case series                                                      |
| Committee on the Review of Medicines [98] | 1978 | Not providing specific recommendations for hyperuricemia or gout |
| Mourgues [99]                             | 2016 | Conference abstract                                              |
| Bakris [100]                              | 1970 | Not providing specific recommendations for hyperuricemia or gout |
| Pai [101]                                 | 2015 | Review                                                           |
| Vargas-Santos [102]                       | 2016 | Review                                                           |
| Filiopoulos [103]                         | 2016 | Comment letter                                                   |
| Chinchilla [104]                          | 2016 | Review                                                           |
| Rimler [105]                              | 2016 | Review                                                           |
| Saito [106]                               | 2016 | Not providing specific recommendations for hyperuricemia or gout |
| Mody [107]                                | 2015 | Review                                                           |
| Richette [108]                            | 2014 | Conference abstract                                              |
| Richette [109]                            | 2014 | Conference abstract                                              |
| Gutierrez [110]                           | 2014 | Conference abstract                                              |
| Furst [111]                               | 2013 | Not providing specific recommendations for hyperuricemia or gout |
| Hershfield [112]                          | 2013 | Not providing specific recommendations for hyperuricemia or gout |
| Andres [113]                              | 2012 | Conference abstract                                              |
| Stevenson [114]                           | 2011 | Technology appraisal                                             |
| Diaz-Borjon [115]                         | 2009 | Review                                                           |
| Furst [116]                               | 2010 | Not providing specific recommendations for hyperuricemia or gout |
| Taylor [117]                              | 2009 | Primary study                                                    |
| Taylor [118]                              | 2008 | Primary study                                                    |
| Bussieres [119]                           | 2008 | Not providing specific recommendations for hyperuricemia or gout |
| Brooks [120]                              | 2007 | Review                                                           |

|    |                                                             |      |                                                                  |
|----|-------------------------------------------------------------|------|------------------------------------------------------------------|
| 1  | Bestermann [121]                                            | 2005 | Not providing specific recommendations for hyperuricemia or gout |
| 2  | Schumacher Jr [122]                                         | 2004 | Review                                                           |
| 3  | Bartlett [123]                                              | 2002 | Not providing specific recommendations for hyperuricemia or gout |
| 4  | Furst [124]                                                 | 2013 | Not providing specific recommendations for hyperuricemia or gout |
| 5  | Newberry [125]                                              | 2017 | Review                                                           |
| 6  | Shekelle [126]                                              | 2017 | Review                                                           |
| 7  | Sandberg [127]                                              | 2015 | Not providing specific recommendations for hyperuricemia or gout |
| 8  | Kallinich [128]                                             | 2007 | Not providing specific recommendations for hyperuricemia or gout |
| 9  | Preminger [129]                                             | 2007 | Not providing specific recommendations for hyperuricemia or gout |
| 10 | TA164 [130]                                                 | 2008 | Technology appraisal                                             |
| 11 | Phoon [131]                                                 | 2012 | Not providing specific recommendations for hyperuricemia or gout |
| 12 | Li [132]                                                    | 2011 | Review                                                           |
| 13 | Zhang [133]                                                 | 2013 | Review                                                           |
| 14 | Deng [134]                                                  | 2016 | Primary study                                                    |
| 15 | Chinese Rheumatology Association [135]                      | 2004 | Replaced by updated versions from the same organization          |
| 16 | Chinese College of Cardiovascular Physicians [136]          | 2010 | Replaced by updated versions from the same organization          |
| 17 | Chinese Rheumatology Association [137]                      | 2011 | Replaced by updated versions from the same organization          |
| 18 | National Department of Health, Pretoria, South Africa [138] | 2006 | Not providing specific recommendations for hyperuricemia or gout |
| 19 | European Medicines Agency [139]                             | 2012 | Not providing specific recommendations for hyperuricemia or gout |
| 20 | Agency for Healthcare Research and Quality [140]            | 2017 | Review                                                           |
| 21 | Agency for Healthcare Research and Quality [141]            | 2017 | Review                                                           |
| 22 | National Institute for Health and Care Excellence [142]     | 2013 | Technology appraisal                                             |
| 23 | Agency for Healthcare Research and Quality [143]            | 2016 | Review                                                           |
| 24 | National Health System, United Kingdom [144]                | 2013 | Not providing specific recommendations for hyperuricemia or gout |
| 25 | Canadian Expert Drug Advisory Committee [145]               | 2011 | Not providing specific recommendations for hyperuricemia or gout |
| 26 | CME Academic Detailing Service [146]                        | 2013 | Presented as a 'handout', not a clinical practice guideline.     |
| 27 | Henderson [147]                                             | 2015 | Not released by a professional association                       |

**Supplementary Table 5. Domain score for each included guidance document**

| Document              | Domain 1, % | Domain 2, % | Domain 3, % | Domain 4, % | Domain 5, % | Domain 6, % |
|-----------------------|-------------|-------------|-------------|-------------|-------------|-------------|
| 3e_2013 [36]          | 95.8        | 34.7        | 65.6        | 77.8        | 42.7        | 72.9        |
| 3e_AU_NZ_2015 [43]    | 84.7        | 34.7        | 71.4        | 73.6        | 27.1        | 0.0         |
| 3e_PT_2014 [40]       | 95.8        | 22.2        | 42.7        | 70.8        | 27.1        | 0.0         |
| ACP_2017 [19, 20]     | 93.1        | 70.8        | 80.2        | 86.1        | 27.1        | 70.8        |
| ACR_2012 [14, 15]     | 86.1        | 81.9        | 73.4        | 84.7        | 1.0         | 45.8        |
| ACR_EULAR_2015 [42]   | 86.1        | 50.0        | 71.4        | 98.6        | 27.1        | 50.0        |
| BSR_2017 [21]         | 100.0       | 80.6        | 78.1        | 77.8        | 66.7        | 83.3        |
| CCCP_2012 [47]        | 76.4        | 9.7         | 8.3         | 62.5        | 0.0         | 0.0         |
| CRA_2016 [41]         | 84.7        | 48.6        | 50.5        | 70.8        | 2.1         | 33.3        |
| CRA_multi_2017 [22]   | 79.2        | 54.2        | 13.0        | 63.9        | 2.1         | 0.0         |
| CSE_2013 [37]         | 66.7        | 38.9        | 15.6        | 81.9        | 9.4         | 0.0         |
| EULAR_2006 [18]       | 86.1        | 23.6        | 65.1        | 90.3        | 24.0        | 16.7        |
| EULAR_2011 [17]       | 86.1        | 48.6        | 61.5        | 90.3        | 13.5        | 52.1        |
| EULAR_2016 [16]       | 83.3        | 79.2        | 67.7        | 94.4        | 26.0        | 29.2        |
| FMOH_2014 [44]        | 70.8        | 50.0        | 3.1         | 48.6        | 6.3         | 0.0         |
| JSGNAM_2011 [48]      | 81.9        | 38.9        | 37.0        | 87.5        | 0.0         | 0.0         |
| MOH_MSR_AMM_2008 [49] | 98.6        | 61.1        | 46.4        | 94.4        | 11.5        | 31.3        |
| PRA_2008 [50]         | 79.2        | 70.8        | 63.5        | 76.4        | 10.4        | 12.5        |
| SAMA_2003 [51]        | 75.0        | 37.5        | 28.1        | 80.6        | 5.2         | 50.0        |
| SER_2013 [46]         | 95.8        | 72.2        | 56.8        | 70.8        | 22.9        | 54.2        |
| SIR_2013 [45]         | 97.2        | 55.6        | 56.8        | 77.8        | 20.8        | 0.0         |
| T2T_2016 [39]         | 95.8        | 47.2        | 61.5        | 81.9        | 4.2         | 50.0        |
| TRA_2016 [38]         | 73.6        | 40.3        | 14.1        | 86.1        | 7.3         | 0.0         |
| UTAustin_2009 [52]    | 76.4        | 27.8        | 42.2        | 68.1        | 4.2         | 27.1        |
| <b>Median</b>         | 85.4        | 48.6        | 56.8        | 79.2        | 10.9        | 28.1        |
| <b>Minimum</b>        | 66.7        | 9.7         | 3.1         | 48.6        | 0.0         | 0.0         |
| <b>Maximum</b>        | 100.0       | 81.9        | 80.2        | 98.6        | 66.7        | 83.3        |

Supplementary Table 6. Mean scores across reviewers for the individual AGREE II domain items

| Document              | Domain 1 |     |     | Domain 2 |     |     | Domain 3 |     |     |     |     |     |     | Domain 4 |     |     | Domain 5 |     |     |     | Domain 6 |     |     |
|-----------------------|----------|-----|-----|----------|-----|-----|----------|-----|-----|-----|-----|-----|-----|----------|-----|-----|----------|-----|-----|-----|----------|-----|-----|
|                       | 1        | 2   | 3   | 4        | 5   | 6   | 7        | 8   | 9   | 10  | 11  | 12  | 13  | 14       | 15  | 16  | 17       | 18  | 19  | 20  | 21       | 22  | 23  |
| 3e_2013 [36]          | 6.8      | 6.5 | 7.0 | 7.0      | 1.3 | 1.0 | 6.3      | 3.8 | 6.3 | 5.8 | 5.8 | 6.8 | 4.0 | 1.0      | 6.0 | 7.0 | 4.0      | 6.8 | 1.0 | 5.3 | 1.3      | 7.0 | 3.8 |
| 3e_AU_NZ_2015 [43]    | 6.0      | 5.5 | 6.8 | 5.8      | 1.0 | 2.5 | 6.5      | 6.8 | 7.0 | 6.5 | 6.5 | 6.8 | 1.3 | 1.0      | 5.8 | 6.0 | 4.5      | 5.8 | 1.0 | 2.8 | 1.0      | 1.0 | 1.0 |
| 3e_PT_2014 [40]       | 6.5      | 7.0 | 6.8 | 4.8      | 1.3 | 1.0 | 2.8      | 2.3 | 5.5 | 3.5 | 5.5 | 6.8 | 1.3 | 1.0      | 5.5 | 6.3 | 4.0      | 4.5 | 1.3 | 2.8 | 2.0      | 1.0 | 1.0 |
| ACP_2017 [19, 20]     | 6.0      | 6.8 | 7.0 | 6.3      | 5.3 | 4.3 | 6.8      | 6.8 | 6.5 | 5.0 | 6.5 | 5.3 | 4.8 | 5.0      | 5.3 | 6.8 | 6.5      | 2.5 | 1.8 | 5.3 | 1.0      | 4.0 | 6.5 |
| ACR_2012 [14, 15]     | 6.5      | 5.5 | 6.5 | 7.0      | 5.3 | 5.5 | 7.0      | 7.0 | 6.8 | 6.0 | 5.8 | 6.0 | 1.5 | 3.3      | 5.8 | 7.0 | 5.5      | 1.0 | 1.0 | 1.0 | 1.3      | 3.3 | 4.3 |
| ACR_EULAR_2015 [42]   | 6.5      | 5.0 | 7.0 | 5.3      | 4.8 | 2.0 | 7.0      | 6.8 | 5.3 | 6.0 | 7.0 | 5.5 | 1.8 | 3.0      | 6.8 | 7.0 | 7.0      | 3.8 | 4.0 | 1.8 | 1.0      | 3.8 | 4.3 |
| BSR_2017 [21]         | 7.0      | 7.0 | 7.0 | 5.5      | 5.3 | 6.8 | 7.0      | 6.0 | 6.5 | 6.8 | 6.3 | 6.0 | 5.0 | 2.0      | 6.8 | 6.8 | 3.5      | 4.8 | 4.8 | 6.5 | 4.0      | 7.0 | 5.0 |
| CCCP_2012 [47]        | 6.8      | 3.0 | 7.0 | 2.0      | 1.0 | 1.8 | 1.0      | 1.0 | 1.0 | 1.0 | 3.8 | 2.0 | 1.3 | 1.0      | 4.5 | 5.8 | 4.0      | 1.0 | 1.0 | 1.0 | 1.0      | 1.0 | 1.0 |
| CRA_2016 [41]         | 6.3      | 5.0 | 7.0 | 5.5      | 1.0 | 5.3 | 5.0      | 3.3 | 6.3 | 3.5 | 6.0 | 5.5 | 1.8 | 1.0      | 5.3 | 6.5 | 4.0      | 1.3 | 1.0 | 1.3 | 1.0      | 1.0 | 5.0 |
| CRA_multi_2017 [22]   | 7.0      | 3.5 | 6.8 | 4.8      | 1.3 | 6.8 | 1.0      | 1.0 | 1.0 | 1.3 | 5.0 | 2.8 | 1.3 | 1.0      | 5.0 | 6.5 | 3.0      | 1.0 | 1.3 | 1.0 | 1.3      | 1.0 | 1.0 |
| CSE_2013 [37]         | 7.0      | 1.8 | 6.3 | 3.0      | 1.0 | 6.0 | 1.0      | 1.0 | 2.0 | 1.0 | 5.0 | 3.5 | 1.0 | 1.0      | 5.5 | 5.5 | 6.8      | 3.0 | 1.0 | 1.0 | 1.3      | 1.0 | 1.0 |
| EULAR_2006 [18]       | 6.0      | 5.5 | 7.0 | 5.0      | 1.0 | 1.3 | 7.0      | 7.0 | 5.8 | 4.3 | 6.0 | 5.8 | 1.3 | 2.3      | 6.0 | 6.8 | 6.5      | 1.0 | 2.5 | 5.3 | 1.0      | 3.0 | 1.0 |
| EULAR_2011 [17]       | 6.5      | 5.0 | 7.0 | 5.0      | 1.0 | 5.8 | 4.0      | 4.5 | 6.8 | 6.0 | 7.0 | 7.0 | 1.3 | 1.0      | 5.8 | 6.8 | 6.8      | 1.3 | 1.3 | 3.8 | 1.0      | 3.8 | 4.5 |
| EULAR_2016 [16]       | 6.3      | 4.8 | 7.0 | 5.8      | 5.0 | 6.5 | 5.0      | 2.0 | 6.3 | 6.8 | 6.0 | 6.5 | 6.0 | 2.0      | 6.5 | 6.8 | 6.8      | 3.0 | 1.3 | 5.0 | 1.0      | 1.5 | 4.0 |
| FMOH_2014 [44]        | 6.5      | 2.8 | 6.5 | 5.3      | 1.0 | 5.8 | 1.0      | 1.0 | 1.0 | 1.0 | 2.0 | 1.5 | 1.0 | 1.0      | 3.0 | 4.5 | 4.3      | 1.0 | 1.3 | 2.3 | 1.0      | 1.0 | 1.0 |
| JSGNAM_2011 [48]      | 5.3      | 5.5 | 7.0 | 1.8      | 4.3 | 4.0 | 1.3      | 1.0 | 6.8 | 3.3 | 6.3 | 3.8 | 2.5 | 1.0      | 6.8 | 6.3 | 5.8      | 1.0 | 1.0 | 1.0 | 1.0      | 1.0 | 1.0 |
| MOH_MSR_AMM_2008 [49] | 6.8      | 7.0 | 7.0 | 5.5      | 1.5 | 7.0 | 4.3      | 1.0 | 5.8 | 1.5 | 5.8 | 4.8 | 2.5 | 4.8      | 6.5 | 6.8 | 6.8      | 1.8 | 3.0 | 1.0 | 1.0      | 4.0 | 1.8 |
| PRA_2008 [50]         | 6.5      | 5.5 | 5.3 | 3.8      | 5.0 | 7.0 | 5.0      | 4.3 | 7.0 | 4.8 | 6.5 | 4.8 | 1.3 | 5.0      | 5.3 | 6.5 | 5.0      | 1.8 | 1.3 | 2.5 | 1.0      | 1.0 | 2.5 |
| SAMA_2003 [51]        | 6.5      | 3.0 | 7.0 | 4.0      | 1.3 | 4.5 | 1.0      | 1.0 | 1.0 | 4.0 | 6.5 | 2.8 | 2.5 | 2.8      | 5.0 | 6.5 | 6.0      | 1.0 | 2.0 | 1.3 | 1.0      | 7.0 | 1.0 |
| SER_2013 [46]         | 7.0      | 6.3 | 7.0 | 6.8      | 5.0 | 4.3 | 3.3      | 1.0 | 7.0 | 4.0 | 6.8 | 4.8 | 2.0 | 6.5      | 5.8 | 6.8 | 4.3      | 3.5 | 2.3 | 2.8 | 1.0      | 6.5 | 2.0 |
| SIR_2013 [45]         | 6.8      | 6.8 | 7.0 | 6.3      | 1.0 | 5.8 | 4.0      | 6.8 | 6.3 | 4.3 | 6.3 | 5.5 | 1.3 | 1.0      | 6.3 | 6.8 | 4.0      | 2.5 | 1.0 | 4.5 | 1.0      | 1.0 | 1.0 |
| T2T_2016 [39]         | 6.3      | 7.0 | 7.0 | 5.3      | 5.0 | 1.3 | 7.0      | 6.5 | 6.5 | 6.5 | 3.3 | 4.0 | 1.8 | 2.0      | 5.0 | 6.3 | 6.5      | 2.0 | 1.0 | 1.0 | 1.0      | 3.5 | 4.5 |
| TRA_2016 [38]         | 5.8      | 3.5 | 7.0 | 5.0      | 1.5 | 3.8 | 1.0      | 1.3 | 1.0 | 1.3 | 5.5 | 2.5 | 1.3 | 1.0      | 5.5 | 6.5 | 6.5      | 1.0 | 1.5 | 2.3 | 1.0      | 1.0 | 1.0 |
| UTAustin_2009 [52]    | 7.0      | 2.8 | 7.0 | 3.0      | 1.0 | 4.0 | 4.3      | 2.0 | 7.0 | 2.5 | 4.3 | 5.3 | 2.0 | 1.0      | 4.8 | 5.3 | 5.3      | 1.3 | 1.5 | 1.3 | 1.0      | 4.0 | 1.3 |

Supplementary Table 7. Scores for each individual AGREE II domain items by each reviewer

|                            | Ite m1 | Ite m2 | Ite m3 | Ite m4 | Ite m5 | Ite m6 | Ite m7 | Ite m8 | Ite m9 | Item 10 | Item 11 | Item 12 | Item 13 | Item 14 | Item 15 | Item 16 | Item 17 | Item 18 | Item 19 | Item 20 | Item 21 | Item 22 | Item 23 |
|----------------------------|--------|--------|--------|--------|--------|--------|--------|--------|--------|---------|---------|---------|---------|---------|---------|---------|---------|---------|---------|---------|---------|---------|---------|
| <b>3e_2013 [36]</b>        |        |        |        |        |        |        |        |        |        |         |         |         |         |         |         |         |         |         |         |         |         |         |         |
| Rev1                       | 7      | 7      | 7      | 7      | 1      | 1      | 6      | 4      | 4      | 5       | 7       | 7       | 2       | 1       | 6       | 7       | 4       | 7       | 1       | 5       | 1       | 7       | 4       |
| Rev2                       | 6      | 7      | 7      | 7      | 1      | 1      | 6      | 2      | 7      | 5       | 6       | 7       | 4       | 1       | 6       | 7       | 4       | 7       | 1       | 6       | 1       | 7       | 4       |
| Rev3                       | 7      | 5      | 7      | 7      | 2      | 1      | 7      | 5      | 7      | 6       | 5       | 6       | 5       | 1       | 5       | 7       | 4       | 7       | 1       | 5       | 2       | 7       | 3       |
| Rev4                       | 7      | 7      | 7      | 7      | 1      | 1      | 6      | 4      | 7      | 7       | 5       | 7       | 5       | 1       | 7       | 7       | 4       | 6       | 1       | 5       | 1       | 7       | 4       |
| <b>3e_AU_NZ_2015 [43]</b>  |        |        |        |        |        |        |        |        |        |         |         |         |         |         |         |         |         |         |         |         |         |         |         |
| Rev1                       | 5      | 5      | 7      | 7      | 1      | 2      | 7      | 7      | 7      | 7       | 7       | 7       | 2       | 1       | 5       | 6       | 4       | 6       | 1       | 2       | 1       | 1       | 1       |
| Rev2                       | 7      | 5      | 7      | 7      | 1      | 1      | 5      | 7      | 7      | 6       | 6       | 7       | 1       | 1       | 6       | 7       | 4       | 6       | 1       | 4       | 1       | 1       | 1       |
| Rev3                       | 5      | 7      | 7      | 4      | 1      | 4      | 7      | 7      | 7      | 7       | 7       | 7       | 1       | 1       | 6       | 5       | 6       | 6       | 1       | 2       | 1       | 1       | 1       |
| Rev4                       | 7      | 5      | 6      | 5      | 1      | 3      | 7      | 6      | 7      | 6       | 6       | 6       | 1       | 1       | 6       | 6       | 4       | 5       | 1       | 3       | 1       | 1       | 1       |
| <b>3e_PT_2014 [40]</b>     |        |        |        |        |        |        |        |        |        |         |         |         |         |         |         |         |         |         |         |         |         |         |         |
| Rev1                       | 6      | 7      | 7      | 5      | 1      | 1      | 3      | 1      | 7      | 3       | 6       | 7       | 2       | 1       | 5       | 6       | 4       | 4       | 1       | 5       | 1       | 1       | 1       |
| Rev2                       | 6      | 7      | 7      | 5      | 1      | 1      | 3      | 1      | 7      | 3       | 6       | 7       | 1       | 1       | 6       | 7       | 4       | 6       | 1       | 3       | 1       | 1       | 1       |
| Rev3                       | 7      | 7      | 6      | 5      | 2      | 1      | 2      | 1      | 6      | 5       | 4       | 6       | 1       | 1       | 5       | 6       | 4       | 4       | 2       | 2       | 5       | 1       | 1       |
| Rev4                       | 7      | 7      | 7      | 4      | 1      | 1      | 3      | 6      | 2      | 3       | 6       | 7       | 1       | 1       | 6       | 6       | 4       | 4       | 1       | 1       | 1       | 1       | 1       |
| <b>ACP_2017 [19, 20]</b>   |        |        |        |        |        |        |        |        |        |         |         |         |         |         |         |         |         |         |         |         |         |         |         |
| Rev1                       | 6      | 7      | 7      | 6      | 5      | 4      | 7      | 7      | 7      | 5       | 7       | 5       | 5       | 5       | 5       | 7       | 7       | 2       | 2       | 4       | 1       | 4       | 7       |
| Rev2                       | 6      | 7      | 7      | 6      | 5      | 4      | 7      | 7      | 7      | 5       | 7       | 5       | 5       | 4       | 6       | 7       | 7       | 4       | 3       | 7       | 1       | 4       | 7       |
| Rev3                       | 6      | 7      | 7      | 6      | 6      | 3      | 6      | 6      | 6      | 6       | 6       | 5       | 4       | 5       | 5       | 6       | 6       | 2       | 1       | 5       | 1       | 4       | 6       |
| Rev4                       | 6      | 6      | 7      | 7      | 5      | 6      | 7      | 7      | 6      | 4       | 6       | 6       | 5       | 6       | 5       | 7       | 6       | 2       | 1       | 5       | 1       | 4       | 6       |
| <b>ACR_2012 [14, 15]</b>   |        |        |        |        |        |        |        |        |        |         |         |         |         |         |         |         |         |         |         |         |         |         |         |
| Rev1                       | 6      | 5      | 7      | 7      | 5      | 7      | 7      | 7      | 6      | 6       | 6       | 5       | 2       | 3       | 5       | 7       | 4       | 1       | 1       | 1       | 1       | 3       | 4       |
| Rev2                       | 6      | 7      | 7      | 7      | 7      | 4      | 7      | 7      | 7      | 6       | 6       | 5       | 2       | 3       | 6       | 7       | 7       | 1       | 1       | 1       | 1       | 4       | 4       |
| Rev3                       | 7      | 5      | 7      | 7      | 5      | 7      | 7      | 7      | 7      | 6       | 5       | 7       | 1       | 3       | 5       | 7       | 7       | 1       | 1       | 1       | 2       | 3       | 4       |
| Rev4                       | 7      | 5      | 5      | 7      | 4      | 4      | 7      | 7      | 7      | 6       | 6       | 7       | 1       | 4       | 7       | 7       | 4       | 1       | 1       | 1       | 1       | 3       | 5       |
| <b>ACR_EULAR_2015 [42]</b> |        |        |        |        |        |        |        |        |        |         |         |         |         |         |         |         |         |         |         |         |         |         |         |
| Rev1                       | 6      | 5      | 7      | 6      | 6      | 2      | 7      | 7      | 7      | 7       | 7       | 5       | 2       | 3       | 7       | 7       | 7       | 3       | 3       | 1       | 1       | 4       | 4       |



|    |  |  |  |  |  |  |  |  |  |  |  |  |  |  |  |  |  |  |  |  |  |  |  |
|----|--|--|--|--|--|--|--|--|--|--|--|--|--|--|--|--|--|--|--|--|--|--|--|
| 1  |  |  |  |  |  |  |  |  |  |  |  |  |  |  |  |  |  |  |  |  |  |  |  |
| 2  |  |  |  |  |  |  |  |  |  |  |  |  |  |  |  |  |  |  |  |  |  |  |  |
| 3  |  |  |  |  |  |  |  |  |  |  |  |  |  |  |  |  |  |  |  |  |  |  |  |
| 4  |  |  |  |  |  |  |  |  |  |  |  |  |  |  |  |  |  |  |  |  |  |  |  |
| 5  |  |  |  |  |  |  |  |  |  |  |  |  |  |  |  |  |  |  |  |  |  |  |  |
| 6  |  |  |  |  |  |  |  |  |  |  |  |  |  |  |  |  |  |  |  |  |  |  |  |
| 7  |  |  |  |  |  |  |  |  |  |  |  |  |  |  |  |  |  |  |  |  |  |  |  |
| 8  |  |  |  |  |  |  |  |  |  |  |  |  |  |  |  |  |  |  |  |  |  |  |  |
| 9  |  |  |  |  |  |  |  |  |  |  |  |  |  |  |  |  |  |  |  |  |  |  |  |
| 10 |  |  |  |  |  |  |  |  |  |  |  |  |  |  |  |  |  |  |  |  |  |  |  |
| 11 |  |  |  |  |  |  |  |  |  |  |  |  |  |  |  |  |  |  |  |  |  |  |  |
| 12 |  |  |  |  |  |  |  |  |  |  |  |  |  |  |  |  |  |  |  |  |  |  |  |
| 13 |  |  |  |  |  |  |  |  |  |  |  |  |  |  |  |  |  |  |  |  |  |  |  |
| 14 |  |  |  |  |  |  |  |  |  |  |  |  |  |  |  |  |  |  |  |  |  |  |  |
| 15 |  |  |  |  |  |  |  |  |  |  |  |  |  |  |  |  |  |  |  |  |  |  |  |
| 16 |  |  |  |  |  |  |  |  |  |  |  |  |  |  |  |  |  |  |  |  |  |  |  |
| 17 |  |  |  |  |  |  |  |  |  |  |  |  |  |  |  |  |  |  |  |  |  |  |  |
| 18 |  |  |  |  |  |  |  |  |  |  |  |  |  |  |  |  |  |  |  |  |  |  |  |
| 19 |  |  |  |  |  |  |  |  |  |  |  |  |  |  |  |  |  |  |  |  |  |  |  |
| 20 |  |  |  |  |  |  |  |  |  |  |  |  |  |  |  |  |  |  |  |  |  |  |  |
| 21 |  |  |  |  |  |  |  |  |  |  |  |  |  |  |  |  |  |  |  |  |  |  |  |
| 22 |  |  |  |  |  |  |  |  |  |  |  |  |  |  |  |  |  |  |  |  |  |  |  |
| 23 |  |  |  |  |  |  |  |  |  |  |  |  |  |  |  |  |  |  |  |  |  |  |  |
| 24 |  |  |  |  |  |  |  |  |  |  |  |  |  |  |  |  |  |  |  |  |  |  |  |
| 25 |  |  |  |  |  |  |  |  |  |  |  |  |  |  |  |  |  |  |  |  |  |  |  |
| 26 |  |  |  |  |  |  |  |  |  |  |  |  |  |  |  |  |  |  |  |  |  |  |  |
| 27 |  |  |  |  |  |  |  |  |  |  |  |  |  |  |  |  |  |  |  |  |  |  |  |
| 28 |  |  |  |  |  |  |  |  |  |  |  |  |  |  |  |  |  |  |  |  |  |  |  |
| 29 |  |  |  |  |  |  |  |  |  |  |  |  |  |  |  |  |  |  |  |  |  |  |  |
| 30 |  |  |  |  |  |  |  |  |  |  |  |  |  |  |  |  |  |  |  |  |  |  |  |
| 31 |  |  |  |  |  |  |  |  |  |  |  |  |  |  |  |  |  |  |  |  |  |  |  |
| 32 |  |  |  |  |  |  |  |  |  |  |  |  |  |  |  |  |  |  |  |  |  |  |  |
| 33 |  |  |  |  |  |  |  |  |  |  |  |  |  |  |  |  |  |  |  |  |  |  |  |
| 34 |  |  |  |  |  |  |  |  |  |  |  |  |  |  |  |  |  |  |  |  |  |  |  |
| 35 |  |  |  |  |  |  |  |  |  |  |  |  |  |  |  |  |  |  |  |  |  |  |  |
| 36 |  |  |  |  |  |  |  |  |  |  |  |  |  |  |  |  |  |  |  |  |  |  |  |
| 37 |  |  |  |  |  |  |  |  |  |  |  |  |  |  |  |  |  |  |  |  |  |  |  |
| 38 |  |  |  |  |  |  |  |  |  |  |  |  |  |  |  |  |  |  |  |  |  |  |  |
| 39 |  |  |  |  |  |  |  |  |  |  |  |  |  |  |  |  |  |  |  |  |  |  |  |
| 40 |  |  |  |  |  |  |  |  |  |  |  |  |  |  |  |  |  |  |  |  |  |  |  |
| 41 |  |  |  |  |  |  |  |  |  |  |  |  |  |  |  |  |  |  |  |  |  |  |  |
| 42 |  |  |  |  |  |  |  |  |  |  |  |  |  |  |  |  |  |  |  |  |  |  |  |
| 43 |  |  |  |  |  |  |  |  |  |  |  |  |  |  |  |  |  |  |  |  |  |  |  |
| 44 |  |  |  |  |  |  |  |  |  |  |  |  |  |  |  |  |  |  |  |  |  |  |  |
| 45 |  |  |  |  |  |  |  |  |  |  |  |  |  |  |  |  |  |  |  |  |  |  |  |
| 46 |  |  |  |  |  |  |  |  |  |  |  |  |  |  |  |  |  |  |  |  |  |  |  |

|                              |   |   |   |   |   |   |   |   |   |   |   |   |   |   |   |   |   |   |   |   |   |   |   |
|------------------------------|---|---|---|---|---|---|---|---|---|---|---|---|---|---|---|---|---|---|---|---|---|---|---|
| <b>Rev2</b>                  | 6 | 5 | 7 | 5 | 1 | 1 | 7 | 7 | 6 | 5 | 6 | 6 | 1 | 1 | 6 | 7 | 6 | 1 | 4 | 6 | 1 | 4 | 1 |
| <b>Rev3</b>                  | 7 | 7 | 7 | 5 | 1 | 1 | 7 | 7 | 6 | 5 | 7 | 6 | 1 | 1 | 7 | 7 | 7 | 1 | 1 | 5 | 1 | 1 | 1 |
| <b>Rev4</b>                  | 6 | 5 | 7 | 5 | 1 | 2 | 7 | 7 | 6 | 4 | 5 | 6 | 1 | 6 | 6 | 6 | 6 | 1 | 3 | 5 | 1 | 3 | 1 |
| <b>EULAR_2011 [17]</b>       |   |   |   |   |   |   |   |   |   |   |   |   |   |   |   |   |   |   |   |   |   |   |   |
| <b>Rev1</b>                  | 6 | 5 | 7 | 4 | 1 | 7 | 4 | 1 | 7 | 7 | 7 | 7 | 2 | 1 | 5 | 7 | 7 | 2 | 1 | 2 | 1 | 4 | 4 |
| <b>Rev2</b>                  | 6 | 5 | 7 | 5 | 1 | 3 | 4 | 7 | 7 | 4 | 7 | 7 | 1 | 1 | 6 | 7 | 7 | 1 | 1 | 5 | 1 | 4 | 4 |
| <b>Rev3</b>                  | 7 | 5 | 7 | 6 | 1 | 7 | 4 | 4 | 7 | 7 | 7 | 7 | 1 | 1 | 6 | 7 | 7 | 1 | 1 | 4 | 1 | 4 | 6 |
| <b>Rev4</b>                  | 7 | 5 | 7 | 5 | 1 | 6 | 4 | 6 | 6 | 6 | 7 | 7 | 1 | 1 | 6 | 6 | 6 | 1 | 2 | 4 | 1 | 3 | 4 |
| <b>EULAR_2016 [16]</b>       |   |   |   |   |   |   |   |   |   |   |   |   |   |   |   |   |   |   |   |   |   |   |   |
| <b>Rev1</b>                  | 7 | 7 | 7 | 6 | 5 | 7 | 5 | 2 | 7 | 7 | 7 | 7 | 6 | 1 | 7 | 7 | 7 | 2 | 2 | 5 | 1 | 1 | 4 |
| <b>Rev2</b>                  | 7 | 1 | 7 | 6 | 5 | 7 | 5 | 2 | 7 | 7 | 6 | 7 | 6 | 3 | 7 | 7 | 7 | 4 | 1 | 6 | 1 | 1 | 4 |
| <b>Rev3</b>                  | 5 | 5 | 7 | 5 | 5 | 5 | 5 | 1 | 6 | 6 | 5 | 6 | 6 | 2 | 5 | 6 | 6 | 4 | 1 | 4 | 1 | 1 | 4 |
| <b>Rev4</b>                  | 6 | 6 | 7 | 6 | 5 | 7 | 5 | 3 | 5 | 7 | 6 | 6 | 6 | 2 | 7 | 7 | 7 | 2 | 1 | 5 | 1 | 3 | 4 |
| <b>FMOH_2014 [44]</b>        |   |   |   |   |   |   |   |   |   |   |   |   |   |   |   |   |   |   |   |   |   |   |   |
| <b>Rev1</b>                  | 7 | 3 | 7 | 6 | 1 | 4 | 1 | 1 | 1 | 1 | 2 | 1 | 1 | 1 | 3 | 1 | 4 | 1 | 1 | 2 | 1 | 1 | 1 |
| <b>Rev2</b>                  | 7 | 3 | 7 | 5 | 1 | 7 | 1 | 1 | 1 | 1 | 2 | 1 | 1 | 1 | 4 | 4 | 4 | 1 | 2 | 3 | 1 | 1 | 1 |
| <b>Rev3</b>                  | 6 | 2 | 5 | 5 | 1 | 6 | 1 | 1 | 1 | 1 | 1 | 2 | 1 | 1 | 2 | 7 | 6 | 1 | 1 | 1 | 1 | 1 | 1 |
| <b>Rev4</b>                  | 6 | 3 | 7 | 5 | 1 | 6 | 1 | 1 | 1 | 1 | 3 | 2 | 1 | 1 | 3 | 6 | 3 | 1 | 1 | 3 | 1 | 1 | 1 |
| <b>JSGNAM_2011 [48]</b>      |   |   |   |   |   |   |   |   |   |   |   |   |   |   |   |   |   |   |   |   |   |   |   |
| <b>Rev1</b>                  | 5 | 5 | 7 | 2 | 4 | 4 | 1 | 1 | 6 | 3 | 6 | 3 | 2 | 1 | 7 | 7 | 4 | 1 | 1 | 1 | 1 | 1 | 1 |
| <b>Rev2</b>                  | 6 | 5 | 7 | 2 | 4 | 4 | 1 | 1 | 7 | 4 | 6 | 4 | 3 | 1 | 7 | 6 | 7 | 1 | 1 | 1 | 1 | 1 | 1 |
| <b>Rev3</b>                  | 5 | 7 | 7 | 1 | 4 | 4 | 1 | 1 | 7 | 1 | 7 | 4 | 2 | 1 | 7 | 6 | 7 | 1 | 1 | 1 | 1 | 1 | 1 |
| <b>Rev4</b>                  | 5 | 5 | 7 | 2 | 5 | 4 | 2 | 1 | 7 | 5 | 6 | 4 | 3 | 1 | 6 | 6 | 5 | 1 | 1 | 1 | 1 | 1 | 1 |
| <b>MOH_MSR_AMM_2008 [49]</b> |   |   |   |   |   |   |   |   |   |   |   |   |   |   |   |   |   |   |   |   |   |   |   |
| <b>Rev1</b>                  | 6 | 7 | 7 | 5 | 1 | 7 | 4 | 1 | 5 | 1 | 6 | 5 | 2 | 4 | 7 | 7 | 7 | 2 | 3 | 1 | 1 | 4 | 1 |
| <b>Rev2</b>                  | 7 | 7 | 7 | 5 | 3 | 7 | 4 | 1 | 6 | 2 | 6 | 4 | 3 | 5 | 6 | 7 | 7 | 3 | 5 | 1 | 1 | 4 | 2 |
| <b>Rev3</b>                  | 7 | 7 | 7 | 7 | 1 | 7 | 4 | 1 | 6 | 1 | 6 | 5 | 2 | 5 | 7 | 7 | 7 | 1 | 1 | 1 | 1 | 4 | 2 |
| <b>Rev4</b>                  | 7 | 7 | 7 | 5 | 1 | 7 | 5 | 1 | 6 | 2 | 5 | 5 | 3 | 5 | 6 | 6 | 6 | 1 | 3 | 1 | 1 | 4 | 2 |
| <b>PRA_2008 [50]</b>         |   |   |   |   |   |   |   |   |   |   |   |   |   |   |   |   |   |   |   |   |   |   |   |
| <b>Rev1</b>                  | 5 | 3 | 5 | 4 | 5 | 7 | 5 | 1 | 7 | 4 | 7 | 5 | 1 | 5 | 5 | 7 | 4 | 2 | 1 | 2 | 1 | 1 | 2 |

|                           |   |   |   |   |   |   |   |   |   |   |   |   |   |   |   |   |   |   |   |   |   |   |   |
|---------------------------|---|---|---|---|---|---|---|---|---|---|---|---|---|---|---|---|---|---|---|---|---|---|---|
| <b>Rev2</b>               | 7 | 7 | 4 | 3 | 5 | 7 | 5 | 6 | 7 | 4 | 6 | 4 | 2 | 5 | 5 | 6 | 7 | 3 | 2 | 3 | 1 | 1 | 4 |
| <b>Rev3</b>               | 7 | 7 | 7 | 4 | 5 | 7 | 5 | 5 | 7 | 6 | 7 | 5 | 1 | 5 | 6 | 7 | 5 | 1 | 1 | 2 | 1 | 1 | 2 |
| <b>Rev4</b>               | 7 | 5 | 5 | 4 | 5 | 7 | 5 | 5 | 7 | 5 | 6 | 5 | 1 | 5 | 5 | 6 | 4 | 1 | 1 | 3 | 1 | 1 | 2 |
| <b>SAMA_2003 [51]</b>     |   |   |   |   |   |   |   |   |   |   |   |   |   |   |   |   |   |   |   |   |   |   |   |
| <b>Rev1</b>               | 6 | 3 | 7 | 5 | 1 | 4 | 1 | 1 | 1 | 5 | 7 | 3 | 2 | 3 | 3 | 6 | 7 | 1 | 1 | 2 | 1 | 7 | 1 |
| <b>Rev2</b>               | 7 | 3 | 7 | 4 | 1 | 5 | 1 | 1 | 1 | 5 | 7 | 2 | 4 | 2 | 5 | 7 | 4 | 1 | 5 | 1 | 1 | 7 | 1 |
| <b>Rev3</b>               | 7 | 3 | 7 | 2 | 1 | 5 | 1 | 1 | 1 | 1 | 7 | 3 | 1 | 1 | 6 | 7 | 7 | 1 | 1 | 1 | 1 | 7 | 1 |
| <b>Rev4</b>               | 6 | 3 | 7 | 5 | 2 | 4 | 1 | 1 | 1 | 5 | 5 | 3 | 3 | 5 | 6 | 6 | 6 | 1 | 1 | 1 | 1 | 7 | 1 |
| <b>SER_2013 [46]</b>      |   |   |   |   |   |   |   |   |   |   |   |   |   |   |   |   |   |   |   |   |   |   |   |
| <b>Rev1</b>               | 7 | 6 | 7 | 7 | 5 | 4 | 3 | 1 | 7 | 3 | 7 | 5 | 2 | 5 | 5 | 6 | 4 | 2 | 2 | 2 | 1 | 7 | 2 |
| <b>Rev2</b>               | 7 | 6 | 7 | 6 | 5 | 3 | 3 | 1 | 7 | 5 | 6 | 4 | 2 | 7 | 6 | 7 | 4 | 4 | 5 | 3 | 1 | 5 | 2 |
| <b>Rev3</b>               | 7 | 7 | 7 | 7 | 5 | 5 | 3 | 1 | 7 | 3 | 7 | 6 | 2 | 7 | 7 | 7 | 4 | 4 | 1 | 4 | 1 | 7 | 2 |
| <b>Rev4</b>               | 7 | 6 | 7 | 7 | 5 | 5 | 4 | 1 | 7 | 5 | 7 | 4 | 2 | 7 | 5 | 7 | 5 | 4 | 1 | 2 | 1 | 7 | 2 |
| <b>SIR_2013 [45]</b>      |   |   |   |   |   |   |   |   |   |   |   |   |   |   |   |   |   |   |   |   |   |   |   |
| <b>Rev1</b>               | 7 | 7 | 7 | 6 | 1 | 7 | 4 | 7 | 5 | 3 | 7 | 5 | 2 | 1 | 7 | 7 | 4 | 2 | 1 | 4 | 1 | 1 | 1 |
| <b>Rev2</b>               | 7 | 7 | 7 | 6 | 1 | 4 | 4 | 7 | 7 | 5 | 6 | 5 | 1 | 1 | 6 | 7 | 4 | 4 | 1 | 6 | 1 | 1 | 1 |
| <b>Rev3</b>               | 7 | 7 | 7 | 6 | 1 | 6 | 4 | 7 | 7 | 6 | 7 | 6 | 1 | 1 | 6 | 7 | 4 | 1 | 1 | 4 | 1 | 1 | 1 |
| <b>Rev4</b>               | 6 | 6 | 7 | 7 | 1 | 6 | 4 | 6 | 6 | 3 | 5 | 6 | 1 | 1 | 6 | 6 | 4 | 3 | 1 | 4 | 1 | 1 | 1 |
| <b>T2T_2016 [39]</b>      |   |   |   |   |   |   |   |   |   |   |   |   |   |   |   |   |   |   |   |   |   |   |   |
| <b>Rev1</b>               | 6 | 7 | 7 | 5 | 5 | 1 | 7 | 7 | 7 | 7 | 3 | 3 | 2 | 1 | 4 | 6 | 7 | 3 | 1 | 1 | 1 | 4 | 2 |
| <b>Rev2</b>               | 7 | 7 | 7 | 6 | 5 | 1 | 7 | 7 | 7 | 7 | 4 | 5 | 2 | 5 | 6 | 7 | 7 | 1 | 1 | 1 | 1 | 4 | 4 |
| <b>Rev3</b>               | 5 | 7 | 7 | 5 | 5 | 2 | 7 | 6 | 6 | 6 | 2 | 3 | 2 | 1 | 5 | 6 | 6 | 3 | 1 | 1 | 1 | 3 | 6 |
| <b>Rev4</b>               | 7 | 7 | 7 | 5 | 5 | 1 | 7 | 6 | 6 | 6 | 4 | 5 | 1 | 1 | 5 | 6 | 6 | 1 | 1 | 1 | 1 | 3 | 6 |
| <b>TRA_2016 [38]</b>      |   |   |   |   |   |   |   |   |   |   |   |   |   |   |   |   |   |   |   |   |   |   |   |
| <b>Rev1</b>               | 5 | 3 | 7 | 5 | 1 | 4 | 1 | 1 | 1 | 1 | 6 | 2 | 2 | 1 | 6 | 7 | 7 | 1 | 1 | 2 | 1 | 1 | 1 |
| <b>Rev2</b>               | 6 | 3 | 7 | 5 | 1 | 7 | 1 | 1 | 1 | 2 | 6 | 2 | 1 | 1 | 6 | 7 | 7 | 1 | 3 | 3 | 1 | 1 | 1 |
| <b>Rev3</b>               | 6 | 3 | 7 | 5 | 3 | 1 | 1 | 2 | 1 | 1 | 5 | 4 | 1 | 1 | 5 | 6 | 6 | 1 | 1 | 2 | 1 | 1 | 1 |
| <b>Rev4</b>               | 6 | 5 | 7 | 5 | 1 | 3 | 1 | 1 | 1 | 1 | 5 | 2 | 1 | 1 | 5 | 6 | 6 | 1 | 1 | 2 | 1 | 1 | 1 |
| <b>UTAustin_2009 [52]</b> |   |   |   |   |   |   |   |   |   |   |   |   |   |   |   |   |   |   |   |   |   |   |   |
| <b>Rev1</b>               | 7 | 3 | 7 | 4 | 1 | 4 | 4 | 1 | 7 | 3 | 4 | 5 | 2 | 1 | 3 | 4 | 4 | 1 | 1 | 1 | 1 | 4 | 2 |

1  
2  
3  
4  
5  
6  
7  
8  
9  
10  
11  
12  
13  
14  
15  
16  
17  
18  
19  
20  
21  
22  
23  
24  
25  
26  
27  
28  
29  
30  
31  
32  
33  
34  
35  
36  
37  
38  
39  
40  
41  
42  
43  
44  
45  
46

|             |   |   |   |   |   |   |   |   |   |   |   |   |   |   |   |   |   |   |   |   |   |   |   |
|-------------|---|---|---|---|---|---|---|---|---|---|---|---|---|---|---|---|---|---|---|---|---|---|---|
| <b>Rev2</b> | 7 | 3 | 7 | 2 | 1 | 4 | 4 | 1 | 7 | 2 | 4 | 5 | 2 | 1 | 5 | 6 | 7 | 2 | 3 | 1 | 1 | 4 | 1 |
| <b>Rev3</b> | 7 | 2 | 7 | 2 | 1 | 4 | 4 | 1 | 7 | 1 | 6 | 5 | 2 | 1 | 6 | 6 | 7 | 1 | 1 | 1 | 1 | 4 | 1 |
| <b>Rev4</b> | 7 | 3 | 7 | 4 | 1 | 4 | 5 | 5 | 7 | 4 | 3 | 6 | 2 | 1 | 5 | 5 | 3 | 1 | 1 | 2 | 1 | 4 | 1 |

For peer review only

1  
2  
3  
4  
5  
6  
7  
8  
9  
10  
11  
12  
13  
14  
15  
16  
17  
18  
19  
20  
21  
22  
23  
24  
25  
26  
27  
28  
29  
30  
31  
32  
33  
34  
35  
36  
37  
38  
39  
40  
41  
42  
43  
44  
45  
46

For peer review only

**Supplementary Table 8. Summary of recommendations for the diagnosis of gout and hyperuricemia by included guidance document**

IE: insufficient evidence; MSU: monosodium urate; NA: not applicable; NG: not given; SUA: serum uric acid.

|                                                                          | SAMA_2003 [51] | EULAR_2006 [18] | MOH_MSR_AMM_2008 [49] | PRA_2008 [50] | EULAR_2011 [17] | JSGNAM_2011 [48] | CCCP_2012 [47] | 3e_2013 [36] | CSE_2013 [37] | SER_2013 [46] | SIR_2013 [45] | 3e_PT_2014 [40] | 3e_AU_NZ_2015 [43] | ACR_EULAR_2015 [42] | CRA_2016 [41] | TRA_2016 [38] | ACP_2017 [19, 20] | CRA_multi_2017 [22] |
|--------------------------------------------------------------------------|----------------|-----------------|-----------------------|---------------|-----------------|------------------|----------------|--------------|---------------|---------------|---------------|-----------------|--------------------|---------------------|---------------|---------------|-------------------|---------------------|
| <b>Diagnosis of gout</b>                                                 | +              | +               | +                     | NG            | +               | NG               | NG             | +            | NG            | +             | NG            | +               | +                  | +                   | +             | +             | +                 | +                   |
| _Clinical manifestations                                                 | +              | +               | +                     | NA            | +               | NA               | NA             | +            | NA            | +             | NA            | +               | +                  | +                   | +             | +             | +                 | +                   |
| _Laboratory results                                                      | +              | +               | -                     | NA            | +               | NA               | NA             | +            | NA            | +             | NA            | +               | +                  | +                   | +             | +             | +                 | +                   |
| _Imaging results                                                         | -              | +*              | -                     | NA            | -               | NA               | NA             | +            | NA            | +             | NA            | +               | +                  | +                   | +             | +             | IE                | +                   |
| _MSU crystal as definitive diagnosis                                     | +              | +               | +                     | NA            | +               | NA               | NA             | +            | NA            | +             | NA            | +               | +                  | +                   | +             | +             | +                 | +                   |
| Monitor urate deposits clearance by imaging                              | -              | -               | -                     | -             | -               | -                | -              | -            | -             | IE            | -             | -               | -                  | +                   | -             | -             | -                 | +                   |
| Is the timing to assess urate deposits with imaging techniques provided? | -              | -               | -                     | -             | -               | -                | -              | -            | -             | -             | -             | -               | -                  | -                   | -             | -             | -                 | -                   |
| SUA for hyperuricemia, $\mu\text{mol/L}$ [mg/dL]                         | +              | NG              | +                     | +             | +               | +                | +              | NG           | +             | +             | +             | NG              | NG                 | NG                  | NG            | +             | NG                | +                   |
| _All gender                                                              | 420            | NG              | NG                    | NG            | [6.8]           | [7.0]            | 420 [7.0]      | NG           | NG            | NG            | 404 [6.8]     | NG              | NG                 | NG                  | NG            | [7.0]         | NG                | NG                  |
| _Female                                                                  | NG             | NG              | 360 [6.0]             | 357 [6.0]     | NG              | NG               | NG             | NG           | 360           | [6.0]         | NG            | NG              | NG                 | NG                  | NG            | NG            | NG                | 360                 |
| _Male                                                                    | NG             | NG              | 420 [7.0]             | 416 [7.0]     | NG              | NG               | NG             | NG           | 420           | [7.0]         | NG            | NG              | NG                 | NG                  | NG            | NG            | NG                | 420                 |
| <b>Diagnosis of asymptomatic hyperuricemia</b>                           | NG             | NG              | +                     | +             | NG              | +                | +              | +            | NG            | +             | NG            | NG              | NG                 | NG                  | NG            | +             | NG                | NG                  |
| _Gout flare                                                              | NA             | NA              | -                     | +             | NA              | +                | +              | +            | NA            | +             | NA            | NA              | NA                 | NA                  | NA            | +             | NA                | NA                  |
| _Tophi                                                                   | NA             | NA              | -                     | -             | NA              | +                | -              | +            | NA            | -             | NA            | NA              | NA                 | NA                  | NA            | -             | NA                | NA                  |
| _Additional medical conditions†                                          | NA             | NA              | +                     | +             | NA              | +                | +              | -            | NA            | -             | NA            | NA              | NA                 | NA                  | NA            | +             | NA                | NA                  |

\*Imaging results are considered for chronic gout, but not for early/acute gout.

†Additional medical conditions considered in the definition of asymptomatic hyperuricemia included complications of gout [47], renal disorder [48], signs or symptoms of

1  
2  
3 urate deposition [49], and uric acid nephrolithiasis [50]. One document provided a general statement of any clinical presentations [38]. One document explicitly stated that  
4 the inclusion of patients with pre-existing renal or cardiovascular disease was allowed [36].  
5  
6  
7  
8  
9  
10  
11  
12  
13  
14  
15  
16  
17  
18  
19  
20  
21  
22  
23  
24  
25  
26  
27  
28  
29  
30  
31  
32  
33  
34  
35  
36  
37  
38  
39  
40  
41  
42  
43  
44  
45  
46

For peer review only

**Supplementary Table 9. Summary of recommendations for the treatment of hyperuricemia by included guidance documents**

A: allopurinol; Aft: (to initiate ULT) after an acute attack; B: benzbromarone; CCR: creatinine clearance rate; Cr: serum creatinine; CKD: chronic kidney disease; D: (to initiate ULT) during an acute attack; eGFR: estimated glomerular filtration rate; F: febuxostat; IE: insufficient evidence; m: month(s); NA: not applicable; NG: not given; P: probenecid; RF: renal function; SUA: serum uric acid; U: uricosurics without specification; ULT: urate lowering therapy; w: week(s); y: year.

|                                                                       | SAMA_2003 [51] | MOH_MSR_AMM_2008 [49] | PRA_2008 [50] | UTAustin_2009 [52] | EULAR_2011 [17] | JSGNAM_2011 [48] | ACR_2012 [14, 15] | CCCP_2012 [47] | 3e_2013 [36] | CSE_2013 [37] | SER_2013 [46] | SIR_2013 [45] | 3e_PT_2014 [40] | FMOH_2014 [44] | 3e_AU_NZ_2015 [43] | CRA_2016 [41] | EULAR_2016 [16] | T2T_2016 [39] | TRA_2016 [38] | ACP_2017 [19, 20] | BSR_2017 [21] | CRA_multi_2017 [22] |
|-----------------------------------------------------------------------|----------------|-----------------------|---------------|--------------------|-----------------|------------------|-------------------|----------------|--------------|---------------|---------------|---------------|-----------------|----------------|--------------------|---------------|-----------------|---------------|---------------|-------------------|---------------|---------------------|
| Upper limit for target SUA, $\mu\text{mol/L}$ [mg/dL]                 |                |                       |               |                    |                 |                  |                   |                |              |               |               |               |                 |                |                    |               |                 |               |               |                   |               |                     |
| _General target*                                                      | 300            | 360 [6.0]             | [6.0]         | NG                 | [6.0]           | [6.0]            | [6.0]             | 357 [6.0]      | 360 [6.0]    | 360           | [6.0]         | 360 [6.0]     | 360 [6.0]       | NG             | 360 [6.0]          | 360 [6.0]     | 360 [6.0]       | 360 [6.0]     | 360 [6.0]     | NG                | 360           | 360 [6.0]           |
| _Target for serve cases†                                              | NG             | NG                    | NG            | NG                 | [4.0]           | NG               | [5.0]             | NG             | 300          | 300           | NG            | NG            | 300 [5.0]       | NG             | 300                | NG            | 300 [5.0]       | 300 [5.0]     | 300 [5.0]     | NG                | 300           | 300 [5.0]           |
| Lower limit for target SUA, $\mu\text{mol/L}$ [mg/dL]                 | NG             | NG                    | NG            | NG                 | NG              | NG               | NG                | NG             | NG           | NG            | NG            | NG            | NG              | NG             | NG                 | NG            | [3.0]           | NG            | NG            | NG                | NG            | 180                 |
| Drinking water                                                        | -              | +                     | +             | -                  | -               | +                | -                 | +              | -            | +             | +             | -             | -               | +              | -                  | +             | -               | -             | +             | -                 | +             | +                   |
| Urine alkalinisation                                                  | +              | +                     | -             | -                  | +               | -                | +                 | +              | -            | +             | +             | -             | +               | +              | -                  | +             | -               | -             | +             | -                 | +             | +                   |
| Indications for ULT                                                   | +              | +                     | +             | -                  | +               | +                | +                 | +              | -            | +             | +             | +             | -               | NG             | -                  | +             | +               | -             | +             | +                 | +             | +                   |
| _Recurrent attacks                                                    | +, >2          | +, >3/y               | +             | NA                 | +, >1/y         | +                | +, $\geq 2/y$     | -              | NA           | -             | -             | +             | NA              | NG             | -                  | +, >2/y       | +, $\geq 2/y$   | NA            | -             | +, $\geq 2/y$     | +, $\geq 2/y$ | +                   |
| _Tophi                                                                | +              | +                     | +             | NA                 | +               | +                | +                 | -              | NA           | -             | -             | +             | NA              | NG             | NA                 | +             | +               | NA            | +             | +                 | +             | +                   |
| _Urate nephrolithiasis                                                | -              | +                     | +             | NA                 | +               | -                | +                 | -              | NA           | +             | -             | -             | NA              | NG             | NA                 | -             | +               | NA            | +             | +                 | +             | +                   |
| _Arthropathy                                                          | -              | +                     | -             | NA                 | +               | -                | -                 | -              | NA           | -             | -             | +             | NA              | NG             | NA                 | +             | +               | NA            | +             | -                 | +             | +                   |
| _Comorbidities‡                                                       | -              | +                     | +             | NA                 | -               | -                | +                 | +              | NA           | +             | -             | -             | NA              | NG             | NA                 | -             | +               | NA            | -             | +                 | +             | +                   |
| _Others§                                                              | +              | +                     | +             | NA                 | -               | -                | -                 | +              | NA           | -             | +             | -             | NA              | NG             | NA                 | -             | +               | NA            | -             | -                 | +             | +                   |
| Initiate ULT during or after an acute attack (Aft[time after attack]) | Aft            | Aft                   | NG            | Aft (4-6 w)        | Aft             | Aft (2w)         | D                 | NA             | Aft          | D/ Aft (2w)   | NG            | NG            | Aft             | NG             | NG                 | NG            | IE              | IE            | Aft           | NG                | Aft           | Aft                 |
| First line ULT drug(s)                                                | NG             | A                     | A             | NG                 | A, F            | A, B             | A, F              | NG             | A            | NG            | A, F,         | A             | A               | NG             | A                  | NG            | A               | NG            | NG            | NG                | A             | NG                  |



|                                                                                          |        |         |    |    |     |             |         |              |          |         |         |         |            |    |           |       |      |     |       |        |          |            |    |    |
|------------------------------------------------------------------------------------------|--------|---------|----|----|-----|-------------|---------|--------------|----------|---------|---------|---------|------------|----|-----------|-------|------|-----|-------|--------|----------|------------|----|----|
|                                                                                          |        |         |    |    |     |             |         |              |          |         | B       |         |            |    |           |       |      |     |       |        |          |            |    |    |
| <b>Second line ULT drug(s)</b>                                                           | NG     | P       | NG | NG | P   | NG          | P       | NG           | U, F     | NG      | NG      | F, P, B | F, B, P, U | NG | P, B, F   | NG    | F, U | NG  | NG    | NG     | F        | NG         |    |    |
| <b>Allopurinol use</b>                                                                   |        |         |    |    |     |             |         |              |          |         |         |         |            |    |           |       |      |     |       |        |          |            |    |    |
| <b>_Maximum dose (mg/d)</b>                                                              | 300    | NG      | NG | NG | 800 | NG          | 800     | 600          | NG       | 600     | 800-900 | 800     | NG         | NG | 900       | NG    | NG   | NG  | 800   | NG     | 900      | 600        |    |    |
| <b>_RF to initiate dose adjustment (eGFR in ml/min/1.73m<sup>2</sup>, CCr in mL/min)</b> | CCr 60 | CCr 80  | NG | NG | NG  | NG          | CK D4   | NG           | NG       | CCr 60  | CCr 140 | CCr 20  | NG         | NG | NG        | NG    | NG   | NG  | NG    | NG     | eGFR 130 | 1.5mg/eGFR |    |    |
| <b>_Starting dose in normal RF (mg/d)</b>                                                | 50-100 | 100-150 | NG | NG | 100 | 50          | ≤100    | 50           | NG       | 100-150 | NG      | 100     | NG         | NG | NG        | 100   | 100  | NG  | 100   | 50-100 | 200      | 50-100     |    |    |
| <b>_HLA-B*5801 gene screening</b>                                                        | -      | -       | -  | -  | -   | -           | +       | -            | -        | +       | -       | -       | -          | NG | -         | -     | -    | -   | +     | -      | +        | +          |    |    |
| <b>Prophylaxis before ULT</b>                                                            | +      | NG      | NG | NG | +   | NG          | NG      | NG           | NG       | NG      | NG      | NG      | NG         | NG | NG        | NG    | NG   | NG  | NG    | NG     | NG       | NG         | NG | NG |
| <b>Prophylaxis with ULT</b>                                                              | +      | +       | NG | NG | +   | +           | +       | NG           | +        | +       | +       | +       | +          | NG | +         | +     | +    | +   | +     | +      | +        | +          | +  | +  |
| <b>Duration for prophylaxis</b>                                                          | 1-3 m  | 1-6 m** | NG | NG | NG  | NG          | 3-6 m†† | NG           | Un-clear | 6m      | >6m     | NG      | >6m        | NG | Vari-ed‡‡ | 3-6 m | NG   | >6m | 3-6 m | >8w    | <6m      | 3-6m       |    |    |
| <b>Pharmacological ULT for asymptomatic hyperuricemia?</b>                               | -      | +       | NG | -  | -   | +           | IE      | +            | IE       | IE      | NG      | NG      | -§§        | NG | IE        | NG    | NG   | IE  | -     | NG     | -        | NG         |    |    |
| <b>_Comorbidities</b>                                                                    | NA     | -       | NA | NA | NA  | +           | NA      | +            | NA       | NA      | NA      | NA      | -          | NG | NA        | NA    | NA   | NA  | NA    | NA     | NA       | NA         | NA | NA |
| <b>_SUA cut-offs, μmol/L [mg/dL]</b>                                                     | NA     | [10-13] | NA | NA | NA  | [8.0-9.0]¶¶ | NA      | [8.0-9.0]*** | NA       | NA      | NA      | NA      | [9.0]      | NG | NA        | NA    | NA   | NA  | NA    | NA     | NA       | NA         | NA | NA |

\* The general target was the target serum uric acid level for long term control recommended for all patients on pharmacological urate lowering therapy.

† The intensive target the intensive target was the target serum uric acid level for long term control recommended for patients with tophi [16, 17, 22, 36, 38, 40, 43], with recurrent attacks [16, 21, 22], or with chronic gouty arthritis [16, 22], or to prevent crystal formation [21], or to improve gout signs and symptoms [14, 15]. One document provided stricter target for any patient with gout [37], and one for patients with severe gout without clear definition [39].

‡ Comorbidities considered as the indication for ULT include renal impairment [14-16, 19-22, 37, 49, 50], cardiovascular risk or cardiovascular diseases [16, 22, 47], glucose intolerance or DM, lipid disorder, and obesity [22].

§ Others indications considered for pharmacological ULT include joint damage [21], diuretic therapy use [21], young age [16, 21, 22] with some documents defined as less than 40 years old [16, 22], high SUA level defined as >8mg/dL (480 μmol/L) [16] or >13mg/dl [50], impending cytotoxic chemotherapy or radiotherapy for lymphoma or

1  
2  
3 leukaemia [49], persistently raised uric acid levels and willingness to continue lifelong therapy [51]. Some documents evaluated SUA levels in patients after lifestyle  
4 modification and indicated pharmacological ULT in individuals with SUA above 6 mg/dL [46], or with SUA above 8mg/dl with CV risk or CVD and above 9mg/dl without  
5 CV risk or CVD [47].  
6

7 || The starting dose of allopurinol in patients with renal impairment should not exceed 1.5mg/eGFR.

8 ¶ Prophylaxis should be continued until the serum urate is normal and the patient has not had any attacks for 1-3 months.

9 \*\* Prophylaxis should be continued until 6 months free of acute attacks or until 1 month with target serum urate level achieved.

10 †† Prophylaxis should be continued for 1) 6 months' duration, 2) 3 months after achieving the target serum urate level for the patient without tophi detected on physical  
11 examination, or 3) 6 months after achieving the target serum urate level, where there has been resolution of tophi previously detected on physical examination.

12 ‡ The duration for prophylaxis varied and depends on the presence of tophi and comorbidities and on serum urate response. But prophylaxis should be continued until the  
13 target SUA is reached or until the tophi has resolved.

14 §§ The recommendations provided were conflict within the same document.

15 ||| Pharmacological urate lowering therapy is recommended in male patients with serum uric acid >13 mg/dL and in female patients with serum uric acid >10 mg/dL.

16 ¶¶ Pharmacological urate lowering therapy is recommended in patients with serum uric acid >8 mg/dL if with complications or >9 mg/dL in all patients.

17 \*\*\* Pharmacological urate lowering therapy is recommended in patients with serum uric acid >8 mg/dL if with cardiovascular disease or cardiovascular risk factors or >9  
18 mg/dL if without cardiovascular disease or cardiovascular risk factors.  
19  
20  
21  
22  
23  
24  
25  
26  
27  
28  
29  
30  
31  
32  
33  
34  
35  
36  
37  
38  
39  
40  
41  
42  
43  
44  
45  
46

**Supplementary Table 10. Summary of recommendations for the treatment of acute gout by included guidance documents**

NG: not given; NSAIDs: non-steroidal anti-inflammatory drugs.

|                              | What is the first line pharmacological treatment option? | Is colchicine recommended to be given as a fixed dose or as a loading dose + followed doses? | Is intra-articular steroids recommended? | What are the indications for intra-articular steroids? | Which line is intra-articular steroids recommended to be? | Is systemic steroids recommended? | What are the indications for systemic steroids?                                                                                                                | Which line of option is systemic steroids recommended to be? |
|------------------------------|----------------------------------------------------------|----------------------------------------------------------------------------------------------|------------------------------------------|--------------------------------------------------------|-----------------------------------------------------------|-----------------------------------|----------------------------------------------------------------------------------------------------------------------------------------------------------------|--------------------------------------------------------------|
| <b>SAMA_2003 [51]</b>        | NSAIDs                                                   | Loading dose + followed doses                                                                | Yes                                      | Contraindicated to NSAIDs and joint accessible         | NG                                                        | Yes                               | Contraindicated or not responding to NSAIDs or polyarthritis                                                                                                   | NG                                                           |
| <b>MOH_MSR_AMM_2008 [49]</b> | NSAIDs                                                   | NG                                                                                           | Yes                                      | NG                                                     | NG                                                        | Yes                               | Elderly people, renal insufficiency, hepatic dysfunction, cardiac failure, peptic ulcer disease, and hypersensitivity to NSAIDs                                | NG                                                           |
| <b>PRA_2008 [50]</b>         | NSAIDs                                                   | NG                                                                                           | NG                                       | NG                                                     | NG                                                        | Yes                               | Contraindicated to NSAIDs                                                                                                                                      | NG                                                           |
| <b>UTAustin_2009 [52]</b>    | NSAIDs                                                   | Loading dose + followed doses                                                                | Yes                                      | Only 1-2 joints is involved                            | Third                                                     | Yes                               | Contraindicated or not responding to NSAIDs and colchicine and polyarthritis                                                                                   | Third                                                        |
| <b>EULAR_2011 [17]</b>       | Colchicine, NSAIDs, glucocorticoids                      | Loading dose + followed doses                                                                | Yes                                      | NG                                                     | NG                                                        | Yes                               | Contraindications to NSAIDs and colchicine                                                                                                                     | First                                                        |
| <b>JSGNAM_2011 [48]</b>      | Colchicine, NSAIDs                                       | Fixed                                                                                        | NG                                       | NG                                                     | NG                                                        | Yes                               | Contraindicated or not responding to NSAIDs or polyarthritis                                                                                                   | Second                                                       |
| <b>ACR_2012 [14, 15]</b>     | NSAIDs, corticosteroids, colchicine                      | Loading dose + followed doses                                                                | Yes                                      | Involvement of 1 or 2 large joints                     | First                                                     | Yes                               | Oral steroids for involvement of 1 or 2 joints or when intra-articular joint injection is impractical. Intravenous steroids for the nothing by mouth patients. | First                                                        |
| <b>3e_2013 [36]</b>          | NSAIDs, colchicine, glucocorticoids                      | NG                                                                                           | Yes                                      | NG                                                     | First                                                     | Yes                               | NG                                                                                                                                                             | First                                                        |
| <b>CSE_2013 [37]</b>         | NSAIDs, colchicine,                                      | NG                                                                                           | NG                                       | NG                                                     | NG                                                        | NG                                | NG                                                                                                                                                             | NG                                                           |

|                            |                                           |                                           |     |                                                                                           |       |     |                                                                                        |        |
|----------------------------|-------------------------------------------|-------------------------------------------|-----|-------------------------------------------------------------------------------------------|-------|-----|----------------------------------------------------------------------------------------|--------|
|                            | corticosteroids                           |                                           |     |                                                                                           |       |     |                                                                                        |        |
| <b>SER_2013 [46]</b>       | NSAIDs                                    | NG                                        | Yes | Monoarthritis                                                                             | NG    | Yes | Contraindicated to NSAIDs                                                              | NG     |
| <b>SIR_2013 [45]</b>       | NSAIDs,<br>colchicine                     | NG                                        | Yes | NG                                                                                        | NG    | Yes | Intolerance or contraindications to NSAIDs and colchicine                              | NG     |
| <b>3e_PT_2014 [40]</b>     | Colchicine,<br>NSAIDs                     | Fixed low dose                            | Yes | NG                                                                                        | NG    | Yes | NG                                                                                     | NG     |
| <b>FMOH_2014 [44]</b>      | NG                                        | NG                                        | NG  | NG                                                                                        | NG    | NG  | NG                                                                                     | NG     |
| <b>3e_AU_NZ_2015 [43]</b>  | NSAIDs,<br>colchicine,<br>glucocorticoids | NG                                        | Yes | NG                                                                                        | First | Yes | NG                                                                                     | First  |
| <b>CRA_2016 [41]</b>       | NSAIDs                                    | NG                                        | NG  | NG                                                                                        | NG    | Yes | Contraindications to NSAIDs and colchicine                                             | NG     |
| <b>EULAR_2016 [16]</b>     | Colchicine,<br>NSAIDs,<br>corticosteroid  | Loading dose +<br>followed doses          | Yes | NG                                                                                        | First | Yes | NG                                                                                     | First  |
| <b>T2T_2016 [39]</b>       | Anti-inflammatory<br>medications          | NG                                        | NG  | NG                                                                                        | NG    | NG  | NG                                                                                     | NG     |
| <b>TRA_2016 [38]</b>       | NSAIDs                                    | Fixed or Loading dose<br>+ followed doses | Yes | Involvement of 1-2 major<br>joints, contraindications<br>to both colchicine and<br>NSAIDs | NG    | Yes | Contraindications to NSAIDs and colchicine                                             | NG     |
| <b>ACP_2017 [19, 20]</b>   | Corticosteroids                           | Loading dose +<br>followed doses          | NG  | NG                                                                                        | NG    | Yes | If not contraindicated.                                                                | First  |
| <b>BSR_2017 [21]</b>       | NSAIDs,<br>colchicine                     | NG                                        | Yes | Patients with acute illness<br>and comorbidity                                            | First | Yes | Intolerance to NSAIDs and colchicine and<br>intra-articular injection is not feasible. | Second |
| <b>CRA_multi_2017 [22]</b> | NSAIDs,<br>colchicine                     | Loading dose +<br>followed doses          | Yes | Involvement of 1-2 major<br>joints and not responding<br>to systemic treatment            | NG    | Yes | Contraindicated to or not responding to<br>NSAIDs and colchicine                       | NG     |

**Supplementary Table 11. Summary of recommendations for the treatment of tophi by included guidance documents**

A: allopurinol; B: benzbromarone; F: febuxostat; NA: not applicable; NG: not given; P: pegloticase; R: rasburicase; ULT: urate lowering therapy; WH: wound healing.

|                                      | SAMA_2003 [51] | MOH_MSR_AMM_2008 [49] | PRA_2008 [50] | UTAustin_2009 [52] | EULAR_2011 [17] | JSGNAM_2011 [48] | ACR_2012 [14, 15] | 3e_2013 [36] | CSE_2013 [37] | SER_2013 [46] | SIR_2013 [45] | 3e_PT_2014 [40] | FMOH_2014 [44] | 3e_AU_NZ_2015 [43] | CRA_2016 [41] | EULAR_2016 [16] | T2T_2016 [39] | TRA_2016 [38] | ACP_2017 [19, 20] | BSR_2017 [21] | CRA_multi_2017 [22] |
|--------------------------------------|----------------|-----------------------|---------------|--------------------|-----------------|------------------|-------------------|--------------|---------------|---------------|---------------|-----------------|----------------|--------------------|---------------|-----------------|---------------|---------------|-------------------|---------------|---------------------|
| <b>Is surgery recommended?</b>       | +              | +                     | NG            | NG                 | NG              | +                | NG                | +            | NG            | NG            | NG            | +               | NG             | +                  | NG            | NG              | IE            | +             | NG                | -             | +                   |
| <b>Indications for surgery</b>       | NG             | +                     | NG            | NG                 | NG              | NG               | NG                | +            | NG            | NG            | NG            | NG              | NG             | +                  | NG            | NG              | NG            | +             | NG                | NG            | +                   |
| <b>_Nerve compression</b>            | NA             | -                     | NA            | NA                 | NA              | NA               | NA                | +            | NA            | NA            | NA            | NA              | NA             | +                  | NA            | NA              | NA            | +             | NA                | NA            | +                   |
| <b>_Infection</b>                    | NA             | -                     | NA            | NA                 | NA              | NA               | NA                | +            | NA            | NA            | NA            | NA              | NA             | +                  | NA            | NA              | NA            | +             | NA                | NA            | -                   |
| <b>_Mechanical impingement</b>       | NA             | -                     | NA            | NA                 | NA              | NA               | NA                | +            | NA            | NA            | NA            | NA              | NA             | +                  | NA            | NA              | NA            | -             | NA                | NA            | -                   |
| <b>_Loss of mobility</b>             | NA             | +                     | NA            | NA                 | NA              | NA               | NA                | -            | NA            | NA            | NA            | NA              | NA             | -                  | NA            | NA              | NA            | +             | NA                | NA            | -                   |
| <b>_Severe pain</b>                  | NA             | +                     | NA            | NA                 | NA              | NA               | NA                | -            | NA            | NA            | NA            | NA              | NA             | -                  | NA            | NA              | NA            | +             | NA                | NA            | -                   |
| <b>_Tophaceous ulcer</b>             | NA             | +                     | NA            | NA                 | NA              | NA               | NA                | -            | NA            | NA            | NA            | NA              | NA             | -                  | NA            | NA              | NA            | -             | NA                | NA            | +                   |
| <b>_Others*</b>                      | NA             | +                     | NA            | NA                 | NA              | NA               | NA                | -            | NA            | NA            | NA            | NA              | NA             | -                  | NA            | NA              | NA            | +             | NA                | NA            | +                   |
| <b>Risks of surgery</b>              | WH             | NG                    | NG            | NG                 | NG              | NG               | NG                | NG           | NG            | NG            | NG            | NG              | NG             | NG                 | NG            | NG              | NG            | NG            | NG                | NG            | NG                  |
| <b>Is long-term ULT recommended?</b> | +              | +                     | +             | NG                 | +               | +                | +                 | +            | +             | +             | +             | +               | NG             | +                  | +             | +               | +             | +             | +                 | +             | +                   |
| <b>Is any ULT drug recommended?</b>  | A              | -                     | -             | -                  | P               | -                | P                 | -            | B             | F             | NA            | -               | -              | P                  | -             | P               | -             | -             | -                 | P, R          | -                   |

\* Other indications for surgery include large tophi [22], persistent tophi [22], joint deformation [38], major joint destruction [49], pressure symptoms [49], and cosmetic [49].

Supplementary Figure 1. Standardized domain scores by the year of publication

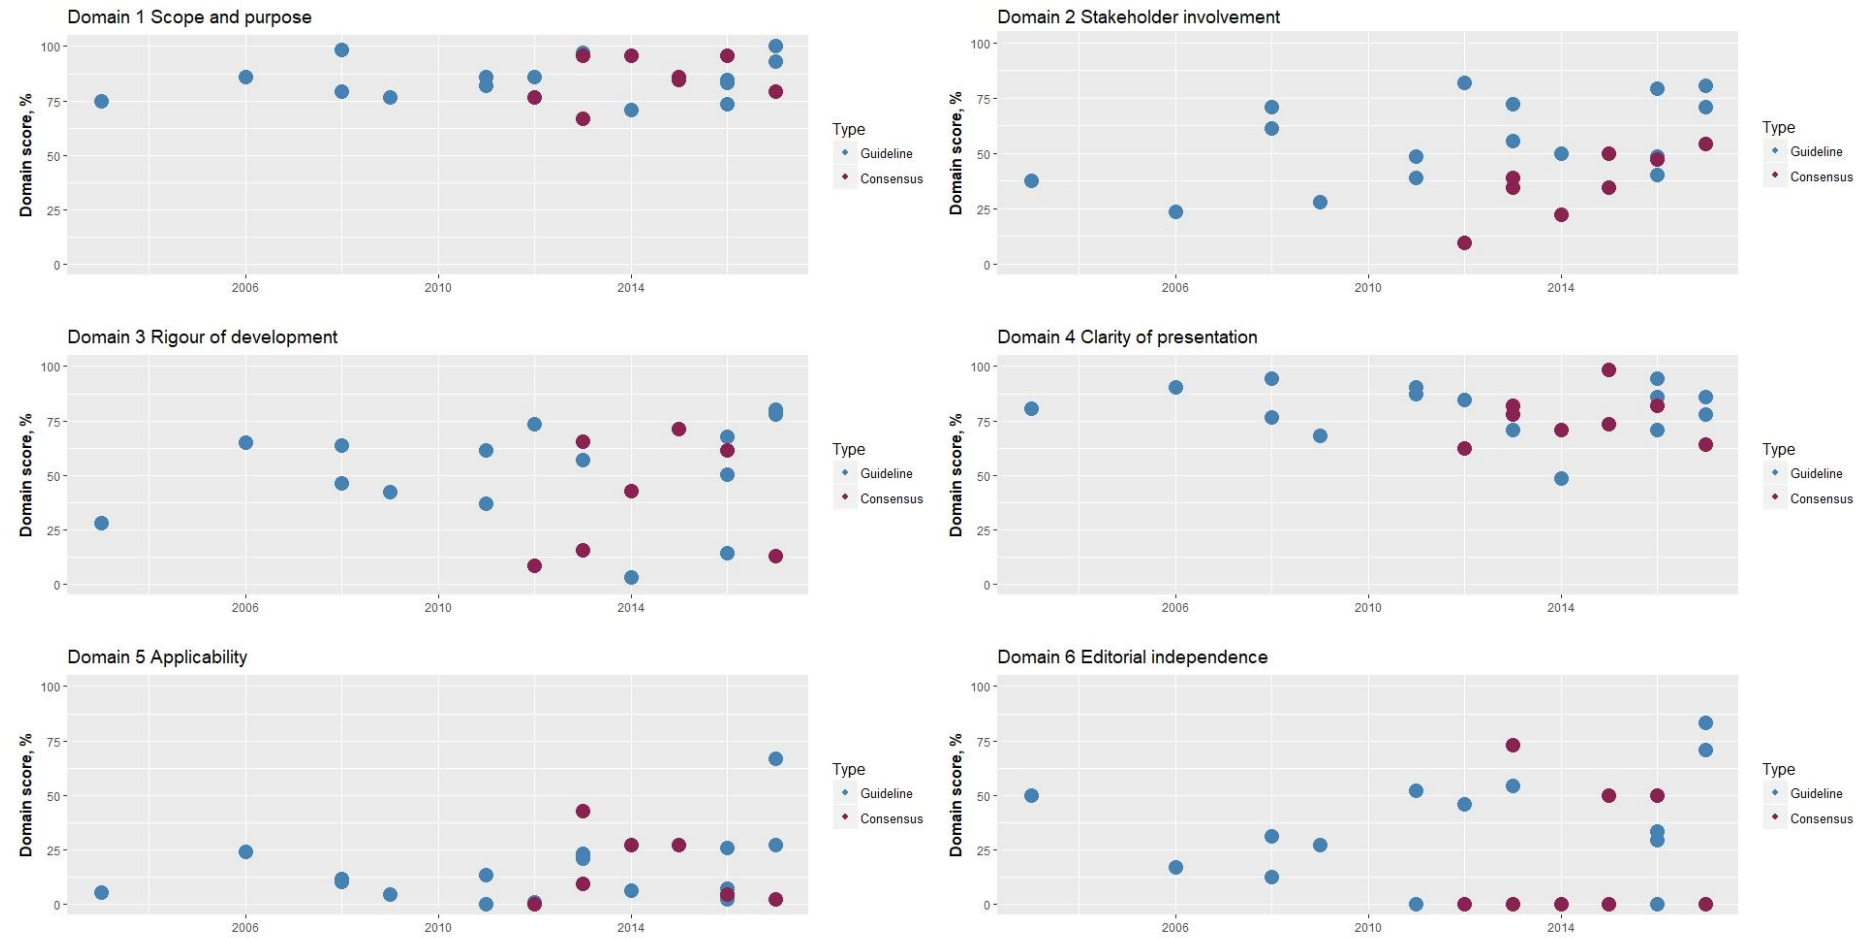

## Supplementary File 1. Instructions for Guideline Appraisal Using the AGREE II Instrument

### TRAINING MATERIALS

- Online tutorial: <http://www.agreetrust.org/resource-centre/agree-ii-training-tools/>
- User's Manual:  
[http://www.agreetrust.org/wp-content/uploads/2013/06/AGREE\\_II\\_Users\\_Manual\\_and\\_23-item\\_Instrument\\_ENGLISH.pdf](http://www.agreetrust.org/wp-content/uploads/2013/06/AGREE_II_Users_Manual_and_23-item_Instrument_ENGLISH.pdf)

### PROLOGUE

- The Appraisal of Guidelines for REsearch & Evaluation (AGREE) Instrument is an international, validated and rigorously developed tool to evaluate the quality of clinical practice guidelines and consensus statements.
- The AGREE II instrument was published in 2010 and consists of 23 key items organized within 6 domains followed by 2 global rating items (“Overall Assessment”). Each domain captures a unique dimension of guideline quality.
  - Scope and purpose
  - Stakeholder involvement
  - Rigour of development
  - Clarity of presentation
  - Applicability
  - Editorial independence.
- Reviewers score each item on a 7-point Likert Scale.
  - 1 - Strongly disagree
  - 7 - Strongly agree
  - For the majority of items, we use an ‘add-up’ strategy to score, that is, corresponding scores will be added to 1’ if information on predefined aspects is provided. For only one item, we subtract scores from 7’.
- Domain scores will be calculated as: (obtained score-minimal possible score)/(maximal possible score-minimal possible score)

### DETAILED INSTRUCTIONS FOR SCORING

(adapted from AGREE II User’s Manual [28])

#### Domain 1 Scope and Purpose

**Item 1 Objectives: The overall objective(s) of the guideline is (are) specifically described.**

#### Instructions:

Information on three aspects should be provided (add corresponding scores for each aspect, 5’ in total):

a) Health intent, i.e., prevention, screening, diagnosis, treatment, etc. (2’);

b) Expected benefit or outcome (2’);

- *Clarification:* If gout epidemiology is provided as background information (i.e., the importance or significance of the diagnosis and management of gout/hyperuricemia is stated), 1’ will be given. If clear statements, such as “to prevent (long term) complications of patients with diabetes mellitus” “to lower the risk of subsequent vascular events in patients with previous myocardial infarction”, are provided, 2’ will be given.

c) Target, e.g., patient population, society (1’).

Performance: Is the item well written and is the content easy to find? (1’)

1  
2 Related *Report Criteria* from *User's Manual*: • health intent(s) (i.e., prevention, screening, diagnosis,  
3 treatment, etc.) • expected benefit or outcome • target(s) (e.g., patient population, society)  
4

5  
6 **Item 2 Questions: The health question(s) covered by the guideline is (are) specifically described.**

7 Instructions:

8 Information on five aspects should be provided (add corresponding scores for each aspect, 5' in total):

- 9 a) Target population (2');  
10 b) Intervention or exposure (if appropriate, 1');  
11 c) Comparisons (if appropriate, 1');  
12 d) Outcome (1');  
13 e) Health care setting or context (1').

14  
15 Performance: Is the item well written and is the content easy to find? (1')

16  
17  
18 Note:

- 19 1) If c) is not appropriate, no score will be subtracted.  
20 2) It is not necessary to have this information provided in questions. Reviewers can try to paraphrase  
21 2-3 key recommendations into questions to see the information above is provided and score based  
22 on paraphrased questions.  
23  
24

25  
26 Related *Report Criteria* from *User's Manual*: • target population • intervention(s) or exposure(s) •  
27 comparisons (if appropriate) • outcome(s) • health care setting or context  
28

29  
30  
31 **Item 3 Population: The population (patients, public, etc.) to whom the guideline is meant to apply  
32 is specifically described.**

33 Instructions:

34 A default full score (7') should be considered. Subtract 1-2 points where the population is not clearly  
35 described or where the descriptions in the guideline is contradictory (e.g., a guideline stating "to treat  
36 asymptomatic hyperuricaemia" in the introduction, while stating "to treat hyperuricaemia and gout" in the  
37 title and providing no specific definition of patients' condition in recommendations).  
38  
39

40  
41  
42 Related *Report Criteria* from *User's Manual*: • target population, gender and age • clinical condition (if  
43 relevant) • severity/stage of disease (if relevant) • comorbidities (if relevant) • excluded populations (if  
44 relevant)  
45

46  
47 **Domain 2 Stakeholder Involvement**

48 **Item 4 Group Membership: The guideline development group includes individuals from all  
49 relevant professional groups.**

50 Instructions:

51 Information on two aspects should be provided (add corresponding scores for each aspect, 5' in total):

- 52 a) The guideline development group is stated (1');  
53 b) For each member of the guideline development group, the following information is included (1' each):  
54 name (1'), discipline/content expertise (e.g., neurosurgeon, methodologist, 1'), institution (e.g., St. Peter's  
55 hospital, 1'), a description of the member's role in the guideline development group (1')  
56 - *Clarification*: Please subtract 1' if no methodologist (i.e., epidemiologist) is inferred from the  
57 discipline/content expertise.  
58  
59

60 Performance: Is the item well written and is the content easy to find? (1')



Note: Where the relation between the guideline development group and the authors is unclear, the authors of the guidance document will be considered as equivalent to the guideline development group.

Related *Report Criteria* from *User's Manual*: • For each member of the guideline development group, the following information is included: name, discipline/content expertise (e.g., neurosurgeon, methodologist), institution (e.g., St. Peter's hospital), geographical location (e.g., Seattle, WA), a description of the member's role in the guideline development group

**Item 5 Target Population Preferences and Views: The views and preferences of the target population (patients, public, etc.) have been sought.**

Instructions:

Information the following four aspects should be provided (add corresponding scores for each aspect, 6' in total):

- a) Statement of type of strategy used to capture patients'/public's' views and preferences (e.g., participation in the guideline development group, literature review of values and preferences, 2');
- b) Methods by which preferences and views were sought (e.g., evidence from literature, surveys, focus groups, 1');
- c) Outcomes/information gathered on patient/public information (2');
- d) Description of how the information gathered was used to inform the guideline development process and/or formation of the recommendations (1')

- *Clarification*: If a patient representative is included in the guideline development panel, scores on aspects a), b), and d) will be given as default.

Related *Report Criteria* from *User's Manual*: • statement of type of strategy used to capture patients'/public's' views and preferences (e.g., participation in the guideline development group, literature review of values and preferences) • methods by which preferences and views were sought (e.g., evidence from literature, surveys, focus groups) • outcomes/information gathered on patient/public information • description of how the information gathered was used to inform the guideline development process and/or formation of the recommendations

**Item 6 Target Users: The target users of the guideline are clearly defined.**

Instructions:

Information on two aspects should be provided (add corresponding scores for each aspect, 6' in total):

- a) Clear description of intended guideline audience (e.g. specialists, family physicians, patients, clinical or institutional leaders/administrators, 3');
- b) Description of how the guideline may be used by its target audience (e.g., to inform clinical decisions, to inform policy, to inform standards of care, 3')

Related *Report Criteria* from *User's Manual*: • clear description of intended guideline audience (e.g. specialists, family physicians, patients, clinical or institutional leaders/administrators) • description of how the guideline may be used by its target audience (e.g., to inform clinical decisions, to inform policy, to inform standards of care)

**Domain 3 Rigour of Development**

**Item 7 Search Methods: Systematic methods were used to search for evidence.**

Instructions:

Information on four aspects should be provided (add corresponding scores for each aspect, 6' in total):

- a) Named electronic database(s) or evidence source(s) where the search was performed (e.g., MEDLINE, EMBASE, PsychINFO, CINAHL, 2');
- b) Time periods searched (e.g., January 1, 2004 to March 31, 2008, 1');
- c) Search terms used (e.g., text words, indexing terms, subheadings, 1');
- d) Full search strategy included (e.g., possibly located in appendix, 2')

Related *Report Criteria* from *User's Manual*: • named electronic database(s) or evidence source(s) where the search was performed (e.g., MEDLINE, EMBASE, PsychINFO, CINAHL) • time periods searched (e.g., January 1, 2004 to March 31, 2008) • search terms used (e.g., text words, indexing terms, subheadings) • full search strategy included (e.g., possibly located in appendix)

### **Item 8 Evidence Selection Criteria: The criteria for selecting the evidence are clearly described.**

#### Instructions:

Information on both inclusion and exclusion criteria should be provided (add corresponding scores for each aspect, 6' in total):

a) Description of the inclusion criteria:

- a1) target population (patient, public, etc.) characteristics (2'),
- a2) study design (2),
- a4) outcomes (1'),

b) Description of the exclusion criteria (if relevant; e.g., French only listed in the inclusion criteria statement could logically preclude non-French listed in the exclusion criteria statement, 1').

Note: if a3), a5), a6), b) is not relevant, no score will be subtracted.

Related *Report Criteria* from *User's Manual*: • description of the inclusion criteria, including: target population (patient, public, etc.) characteristics, study design, comparisons (if relevant), outcomes, language (if relevant), context (if relevant) • description of the exclusion criteria (if relevant; e.g., French only listed in the inclusion criteria statement could logically preclude non-French listed in the exclusion criteria statement)

### **Item 9 Strengths and Limitations of The Evidence: The strengths and limitations of the body of evidence are clearly described.**

#### Instructions:

For each evidence, information on two aspects should be provided. If only some of the evidences report the following information, please first calculate the score based on the most informative evidence (e.g., scored 5'), and then subtract 1' to get the final score (e.g., 5'-1'=4').

For each evidence, both a general statement of the method and detailed descriptions should be provided:

a) A statement of the method used to evaluate the strengths and limitations of the evidence should be provided (3').

b) The stated method should evaluate at least three of the following aspects (add 1' for each aspect, maximum 3'):

- b1) Study design(s);
- b2) Study methodology limitations (e.g., sampling, blinding, allocation concealment, analytical methods);
- b3) Appropriateness/relevance of primary and secondary outcomes considered;
- b4) Consistency of results across studies;
- b5) Direction of results across studies;
- b6) Magnitude of benefit versus magnitude of harm;

1  
2 b7) Applicability to practice context  
3

4 Related *Report Criteria* from *User's Manual*: • descriptions of how the body of evidence was evaluated for  
5 bias and how it was interpreted by members of the guideline development group • aspects upon which to  
6 frame descriptions include: study design(s) included in body of evidence, study methodology limitations  
7 (sampling, blinding, allocation concealment, analytical methods), appropriateness/relevance of primary  
8 and secondary outcomes considered, consistency of results across studies, direction of results across  
9 studies, magnitude of benefit versus magnitude of harm, applicability to practice context  
10  
11  
12

13 **Item 10 Formulation of Recommendations: The methods for formulating the recommendations**  
14 **are clearly described.**

15 Instructions:

16 Information on three aspects should be provide (add 2' for each aspect, 6' in total):

- 17  
18 a) Description of the recommendation development process (e.g., steps used in modified Delphi technique,  
19 voting procedures that were considered, 2');  
20  
21 b) Outcomes of the recommendation development process (e.g., extent to which consensus was reached  
22 using modified Delphi technique, outcome of voting procedures, 2');  
23  
24 c) Description of how the process influenced the recommendations (e.g., results of Delphi technique  
25 influence final recommendation, alignment with recommendations and the final vote, 2')  
26  
27

28 Related *Report Criteria* from *User's Manual*: • description of the recommendation development process  
29 (e.g., steps used in modified Delphi technique, voting procedures that were considered) • outcomes of the  
30 recommendation development process (e.g., extent to which consensus was reached using modified Delphi  
31 technique, outcome of voting procedures) • description of how the process influenced the  
32 recommendations (e.g., results of Delphi technique influence final recommendation, alignment with  
33 recommendations and the final vote)  
34  
35  
36

37 **Item 11 Consideration of Benefits and Harms: The health benefits, side effects, and risks have**  
38 **been considered in formulating the recommendations.**

39 Instructions:

40 For each recommendation, information on four aspects should be provided. If only some of the  
41 recommendations report the following information, please first calculate the score based on the most  
42 informative recommendation (e.g., scored 5'), and subtract 1' to get the final score (e.g., 5'-1'=4').  
43  
44  
45

46 For each recommendation, information on four aspects should be provided (add corresponding scores for  
47 each aspect, 6' in total):

- 48 a) Supporting data and report of benefits (2'); b) Supporting data and report of harms/side effects/risks (2');  
49 - *Clarification*: Data on a) and b) can be provided as references.  
50  
51 c) Reporting of the balance/trade-off between benefits and harms/side effects/risks (1');  
52  
53 d) Recommendations reflect considerations of both benefits and harms/side effects/risks (1')  
54

55 Related *Report Criteria* from *User's Manual*: • supporting data and report of benefits • supporting data and  
56 report of harms/side effects/risks • reporting of the balance/trade-off between benefits and harms/side  
57 effects/risks • recommendations reflect considerations of both benefits and harms/side effects/risks  
58  
59  
60

**Item 12 Link Between Recommendations and Evidence: There is an explicit link between the**  
**recommendations and the supporting evidence.**

**Instructions:**

Information on three aspects should be provided (add 2' for each aspect, 6' in total):

a) The guideline describes how the guideline development group linked and used the evidence to inform recommendations (2');

- *Clarification:* Can be provided as narrative summaries and/or discussions of evidences.

b) Each recommendation is linked to a key evidence description/paragraph and/or reference list (2');

- *Note:* Please subtract 1' if only some recommendations meet criterium b).

c) Recommendations linked to evidence summaries, evidence tables in the results section of the guideline (2')

*Related Report Criteria from User's Manual:* • the guideline describes how the guideline development group linked and used the evidence to inform recommendations • each recommendation is linked to a key evidence description/paragraph and/or reference list • recommendations linked to evidence summaries, evidence tables in the results section of the guideline

**Item 13 External Review: The guideline has been externally reviewed by experts prior to its publication.**

**Instructions:**

Information on five aspects should be provided (add corresponding scores for each aspect, 6' in total):

a) Purpose and intent of the external review (e.g., to improve quality, gather feedback on draft recommendations, assess applicability and feasibility, disseminate evidence, 1');

b) Methods taken to undertake the external review (e.g., rating scale, open-ended questions, 1');

c) Description of the external reviewers (e.g., number, type of reviewers, affiliations, 1');

d) Outcomes/information gathered from the external review (e.g., summary of key findings, 1');

e) Description of how the information gathered was used to inform the guideline development process and/or formation of the recommendations (e.g., guideline panel considered results of review in forming final recommendations, 2')

- *Clarification:* Publication through a peer-reviewed journal can be considered as externally reviewed.

*Note:* If dates of revision and acceptance is provided on the document, it is also considered externally reviewed.

*Related Report Criteria from User's Manual:* • purpose and intent of the external review (e.g., to improve quality, gather feedback on draft recommendations, assess applicability and feasibility, disseminate evidence) • methods taken to undertake the external review (e.g., rating scale, open-ended questions) • description of the external reviewers (e.g., number, type of reviewers, affiliations) • outcomes/information gathered from the external review (e.g., summary of key findings) • description of how the information gathered was used to inform the guideline development process and/or formation of the recommendations (e.g., guideline panel considered results of review in forming final recommendations)

**Item 14 Updating Procedure: A procedure for updating the guideline is provided.**

**Instructions:**

Information on three aspects should be provided (add 2' for each aspect, 6' in total):

a) A statement that the guideline will be updated (2');

b) Explicit time interval or explicit criteria to guide decisions about when an update will occur (2');

c) Methodology for the updating procedure is reported (2')

*Related Report Criteria from User's Manual:* • a statement that the guideline will be updated • explicit

1  
2 time interval or explicit criteria to guide decisions about when an update will occur • methodology for the  
3 updating procedure is reported  
4

#### 5 **Domain 4 Clarity of Presentation**

##### 6 **Item 15 Specific and Unambiguous Recommendations: The recommendations are specific and** 7 **unambiguous.**

###### 8 Instructions:

9  
10 For each recommendation, information on four aspects should be provided. If only some of the  
11 recommendations report the following information, please first calculate the score based on the most  
12 informative recommendation (e.g., scored 5'), and then subtract 1' to get the final score (e.g., 5'-1'=4').  
13  
14

15  
16 For each recommendation, information on four aspects should be provided (add corresponding scores for  
17 each aspect, 6' in total):  
18

19 a) If a recommendation is uncertain, the uncertainty should be reflected in the recommendation and also be  
20 explicitly stated (2')

21 b) Identification of the intent or purpose of the recommended action (e.g., to improve quality of life, to  
22 decrease side effects, 2');  
23

24 - *Clarification:* If the benefit for uric acid lowering in patients with CVD is not clearly stated, the score for  
25 this aspect should not be added.

26 c) Identification of the relevant population (e.g., patients, public, 1');

27 d) Caveats or qualifying statements, if relevant (e.g., patients or conditions for whom the recommendations  
28 would not apply, 1').  
29

30 Note: if c) is not relevant, no score will be subtracted.  
31  
32

33 *Related Report Criteria from User's Manual:* • statement of the recommended action • identification of the  
34 intent or purpose of the recommended action (e.g., to improve quality of life, to decrease side effects) •  
35 identification of the relevant population (e.g., patients, public) • caveats or qualifying statements, if  
36 relevant (e.g., patients or conditions for whom the recommendations would not apply)  
37  
38

##### 39 **Item 16 Management Options: The different options for management of the condition or health issue** 40 **are clearly presented.**

###### 41 Instructions:

42 Information on two aspects should be provided (add 3' for each aspect, 6' in total):  
43

44 a) Description of options (3');

45 b) Description of population or clinical situation most appropriate to each option (3')

46 - *Note:* Please subtract 1' if only some options are provided with the most appropriate population or  
47 clinical situation.  
48  
49

50  
51 *Related Report Criteria from User's Manual:* • description of options • description of population or clinical  
52 situation most appropriate to each option  
53  
54

##### 55 **Item 17 Identifiable Key Recommendations: Key recommendations are easily identifiable.**

###### 56 Instructions:

57 Reporting style should follow two criteria (add 3' for each aspect, 6' in total):  
58

59 a) Description of recommendations in a summarized box, typed in bold, underlined, or presented as flow  
60 charts or algorithms (3');

b) Specific recommendations are grouped together in one section (3')

1  
2 - *Clarification*: If recommendations are summarised in the abstract, scores for aspect b) can also be given.  
3

4 Related *Report Criteria* from *User's Manual*: • description of recommendations in a summarized box,  
5 typed in bold, underlined, or presented as flow charts or algorithms • specific recommendations are  
6 grouped together in one section  
7  
8

## 9 **Domain 5 Applicability**

### 10 **Item 18 Facilitators and Barriers to Application: The guideline describes facilitators and barriers** 11 **to its application.**

#### 12 Instructions:

13 Information on four aspects should be provided (add corresponding scores for each aspect, 6' in total):

14 a) Identification of the types of facilitators and barriers that were considered (2');  
15

16 - *Clarification*: Statements of that certain drugs are not available in certain regions can be considered as  
17 identification of the facilitators and barriers.  
18

19 b) Methods by which information regarding the facilitators and barriers to implementing recommendations  
20 were sought (e.g., feedback from key stakeholders, pilot testing of guidelines before widespread  
21 implementation, 2');  
22

23 c) Information/description of the types of facilitators and barriers that emerged from the inquiry (e.g.,  
24 practitioners have the skills to deliver the recommended care, sufficient equipment is not available to  
25 ensure all eligible members of the population receive mammography, 1');  
26

27 d) Description of how the information influenced the guideline development process and/or formation of  
28 the recommendations (1')  
29

30  
31 Related *Report Criteria* from *User's Manual*: • identification of the types of facilitators and barriers that  
32 were considered • methods by which information regarding the facilitators and barriers to implementing  
33 recommendations were sought (e.g., feedback from key stakeholders, pilot testing of guidelines before  
34 widespread implementation) • information/description of the types of facilitators and barriers that emerged  
35 from the inquiry (e.g., practitioners have the skills to deliver the recommended care, sufficient equipment  
36 is not available to ensure all eligible members of the population receive mammography) • description of  
37 how the information influenced the guideline development process and/or formation of the  
38 recommendations  
39  
40  
41  
42

### 43 **Item 19 Implementation Advice or Tools: The guideline provides advice and/or tools on how the** 44 **recommendations can be put into practice.**

#### 45 Instructions:

46 Information on three aspects should be provided (add corresponding scores for each aspect, 6' in total):

47 a) An implementation section in the guideline (2');  
48

49 b) Tools and resources to facilitate application (add 1' for each tool/resource, maximum 2'): guideline  
50 summary documents, links to check lists/algorithms, links to how-to manuals, solutions linked to barrier  
51 analysis (see Item 18), tools to capitalize on guideline facilitators (see Item 18), outcome of pilot test and  
52 lessons learned;  
53

54 c) Directions on how users can access tools and resources (2')  
55  
56

57 Related *Report Criteria* from *User's Manual*: • an implementation section in the guideline • tools and  
58 resources to facilitate application: guideline summary documents, links to check lists/algorithms, links to  
59 how-to manuals, solutions linked to barrier analysis (see Item 18), tools to capitalize on guideline  
60 facilitators (see Item 18), outcome of pilot test and lessons learned • directions on how users can access

1  
2 tools and resources  
3

4 **Item 20 Resource Implications: The potential resource implications of applying the**  
5 **recommendations have been considered.**

6 - *Clarification:* The aim of this item is to the cost information considered by the guideline.

7 Instructions:  
8

9 Information on four aspects should be provided (add corresponding scores for each aspect, 6' in total):

- 10 a) Identification of the types of cost information that were considered (e.g., economic evaluations, drug  
11 acquisition costs, 2');  
12  
13 b) Methods by which the cost information was sought (e.g., a health economist was part of the guideline  
14 development panel, use of health technology assessments for specific drugs, etc., 2');  
15  
16 c) Information/description of the cost information that emerged from the inquiry (e.g., specific drug  
17 acquisition costs per treatment course, 1');  
18  
19 d) Description of how the information gathered was used to inform the guideline development process  
20 and/or formation of the recommendations (1')  
21

22  
23 Related *Report Criteria* from *User's Manual*: • identification of the types of cost information that were  
24 considered (e.g., economic evaluations, drug acquisition costs) • methods by which the cost information  
25 was sought (e.g., a health economist was part of the guideline development panel, use of health technology  
26 assessments for specific drugs, etc.) • information/description of the cost information that emerged from  
27 the inquiry (e.g., specific drug acquisition costs per treatment course) • description of how the information  
28 gathered was used to inform the guideline development process and/or formation of the recommendations  
29  
30

31 **Item 21 Monitoring or Auditing Criteria: The guideline presents monitoring and/or auditing criteria.**

32 - *Clarification:* The aim of this item is to evaluate the adherence to guidelines, but not to provide follow up  
33 parameters for diseases. *Monitoring* in this item refers to the action to monitor physicians' adherence to the  
34 guideline in daily practice by a group of investigators, but not to monitor the management of the disease in  
35 an individual patient. And the *auditing criteria* are the criteria to assess how well the guideline affects the  
36 practice in a region, but not how well the patients achieve the treatment target.  
37  
38  
39

40 Instructions:  
41

42 Information on four aspects should be provided (add corresponding scores for each aspect, 6' in total):

- 43 a) Identification of criteria to assess guideline implementation or adherence to recommendations (2');  
44  
45 b) Criteria for assessing impact of implementing the recommendations (2');  
46  
47 c) Advice on the frequency and interval of measurement (1');  
48  
49 d) Descriptions or operational definitions of how the criteria should be measured (1')  
50

51 Related *Report Criteria* from *User's Manual*: • identification of criteria to assess guideline implementation  
52 or adherence to recommendations • criteria for assessing impact of implementing the recommendations •  
53 advice on the frequency and interval of measurement • descriptions or operational definitions of how the  
54 criteria should be measured  
55

56 **Domain 6 Editorial Independence**

57 **Item 22 Funding Body: The views of the funding body have not influenced the content of the**  
58 **guideline.**

59 Instructions:  
60

Information on two aspects should be provided (add 3' for each aspect, 6' in total):

- 1  
2 a) The name of the funding body or source of funding (or explicit statement of no funding, 3');  
3 b) A statement that the funding body did not influence the content of the guideline (3')  
4

5  
6 Related *Report Criteria* from *User's Manual*: • the name of the funding body or source of funding (or  
7 explicit statement of no funding) • a statement that the funding body did not influence the content of the  
8 guideline  
9

10  
11 **Item 23 Competing Interests: Competing interests of guideline development group members have**  
12 **been recorded and addressed.**

13 Instructions:

14 Information on four aspects should be provided (add corresponding scores for each aspect, 6' in total):

- 15 a) Description of the types of competing interests considered (2');  
16 b) Methods by which potential competing interests were sought (1');  
17 c) Description of the competing interests (1');  
18 d) Description of how the competing interests influenced the guideline process and development of  
19 recommendations (2')  
20  
21  
22

23  
24 Related *Report Criteria* from *User's Manual*: • description of the types of competing interests considered •  
25 methods by which potential competing interests were sought • description of the competing interests •  
26 description of how the competing interests influenced the guideline process and development of  
27 recommendations  
28  
29

30  
31 **Overall Guideline Assessment**

32 **Question 1 Overall quality: Rate the overall quality of this guideline.**

33 Instructions:

34 7' in total. Reviewer's impression on the overall quality of the guideline.  
35  
36  
37

38 **Question 2 Strength of recommendation: I would recommend this guideline for use.**

39 Instructions:

40 Three options to choose from: a) Yes; b) Yes, with modifications; c) No  
41 Reviewer's impression on whether the guideline is easy to be applied to clinical practice.  
42  
43

44 Related *Report Criteria* from *User's Manual*: The overall assessment requires the AGREE II user to make  
45 a judgment as to the quality of the guideline, taking into account the appraisal items considered in the  
46 assessment process.  
47  
48  
49  
50  
51  
52  
53  
54  
55  
56  
57  
58  
59  
60



## References

14. Khanna D, Fitzgerald JD, Khanna PP, Bae S, Singh MK, Neogi T, Pillinger MH, Merill J, Lee S, Prakash S *et al*: **2012 American College of Rheumatology guidelines for management of gout. Part 1: systematic nonpharmacologic and pharmacologic therapeutic approaches to hyperuricemia.** *Arthritis care & research* 2012, **64**(10):1431-1446.
15. Khanna D, Khanna PP, Fitzgerald JD, Singh MK, Bae S, Neogi T, Pillinger MH, Merill J, Lee S, Prakash S *et al*: **2012 American college of rheumatology guidelines for management of gout. part 2: Therapy and antiinflammatory prophylaxis of acute gouty arthritis.** *Arthritis Care and Research* 2012, **64**(10):1447-1461.
16. Richette P, Doherty M, Pascual E, Barskova V, Becce F, Castaneda-Sanabria J, Coyfish M, Guillo S, Jansen TL, Janssens H *et al*: **2016 updated EULAR evidence-based recommendations for the management of gout.** *Annals of the rheumatic diseases* 2016.
17. Hamburger M, Baraf HS, Adamson TC, 3rd, Basile J, Bass L, Cole B, Doghramji PP, Guadagnoli GA, Hamburger F, Harford R *et al*: **2011 Recommendations for the diagnosis and management of gout and hyperuricemia.** *Postgraduate medicine* 2011, **123**(6 Suppl 1):3-36.
18. Zhang W, Doherty M, Pascual E, Bardin T, Barskova V, Conaghan P, Gerster J, Jacobs J, Leeb B, Liote F *et al*: **EULAR evidence based recommendations for gout. Part I: Diagnosis. Report of a task force of the Standing Committee for International Clinical Studies Including Therapeutics (ESCSIT).** *Annals of the rheumatic diseases* 2006, **65**(10):1301-1311.
19. Qaseem A, McLean RM, Starkey M, Forciea MA: **Diagnosis of acute gout: a clinical practice guideline from the American College of Physicians.** *Annals of internal medicine* 2017, **166**(1):52-57.
20. Qaseem A, Harris RP, Forciea MA: **Management of acute and recurrent gout: a clinical practice guideline from the American College of Physicians.** *Annals of internal medicine* 2017, **166**(1):58-68.
21. Hui M, Carr A, Cameron S, Davenport G, Doherty M, Forrester H, Jenkins W, Jordan KM, Mallen CD, McDonald TM: **The British Society for Rheumatology guideline for the management of gout.** *Rheumatology* 2017, **56**(7):1056-1059.
22. Multi-disciplinary Expert Task Force on Hyperuricemia and Its Related Diseases. **Chinese multi-disciplinary consensus on the diagnosis and treatment of hyperuricemia and its related diseases.** *Chin J Intern Med.* 2017; **56**(3): 235-248 (Original document in Chinese).
28. Brouwers MC, Kho ME, Browman GP, Burgers JS, Cluzeau F, Feder G, Fervers B, Graham ID, Grimshaw J, Hanna SE: **AGREE II: advancing guideline development, reporting and evaluation in health care.** *Canadian Medical Association Journal* 2010, **182**(18):E839-E842.
36. Sivera F, Andres M, Carmona L, Kydd ASR, Moi J, Seth R, Sriranganathan M, Van Durme C, Van Echteld I, Vinik O *et al*: **Multinational evidence-based recommendations for the diagnosis and management of gout: Integrating systematic literature review and expert opinion of a broad panel of rheumatologists in the 3e initiative.** *Annals of the rheumatic diseases* 2014, **73**(2):328-335.
37. Chinese Society of Endocrinology. **Chinese consensus on the management of hyperuricemia and gout.** *Chin J Endocrinol Metab.* 2013; **29**(11): 913-920 (Original document in Chinese).
38. Association TR: **Taiwan guideline for the management of gout and hyperuricemia - updated 2016.** *Formosan Journal of Rheumatology* 2016, **30**:1-32.
39. Kiltz U, Smolen J, Bardin T, Cohen Solal A, Dalbeth N, Doherty M, Engel B, Flader C, Kay J, Matsuoka M *et al*: **Treat-to-target (T2T) recommendations for gout.** *Annals of the rheumatic diseases* 2016.
40. Araujo F, Cordeiro I, Teixeira F, Rovisco J, Ramiro S, Mourao AF, Costa JA, Pimentao JB, Malcata A, Santos MJ *et al*: **Portuguese recommendations for the diagnosis and management of gout.** *Acta reumatologica portuguesa* 2014, **39**(2):158-171.
41. Chinese Rheumatology Association. **2016 Chinese guideline on the diagnosis and management of**

- 1  
2 **gout**. *Chin J Intern Med*. 2016; **55**(11): 892-899 (Original document in Chinese).
- 3  
4 42. Neogi T, Jansen TLTA, Dalbeth N, Franssen J, Schumacher HR, Berendsen D, Brown M, Choi H,  
5 Edwards NL, Janssens HJEM *et al*: **2015 Gout classification criteria: An American College of**  
6 **Rheumatology/European League Against Rheumatism collaborative initiative**. *Annals of the*  
7 *rheumatic diseases* 2015, **74**(10):1789-1798.
- 8  
9 43. Graf SW, Whittle SL, Wechalekar MD, Moi JHY, Barrett C, Hill CL, Littlejohn G, Lynch N, Major G,  
10 Taylor AL *et al*: **Australian and New Zealand recommendations for the diagnosis and**  
11 **management of gout: Integrating systematic literature review and expert opinion in the 3e**  
12 **Initiative**. *International journal of rheumatic diseases* 2015, **18**(3):341-351.
- 13  
14 44. Federal Ministry of Health (Nigeria). **National nutritional guideline on non-communicable disease**  
15 **prevention, control and management**. Accessed at  
16 <http://www.health.gov.ng/doc/NutritionalGuideline.pdf> on 28 July 2017.
- 17  
18 45. Manara M, Bortoluzzi A, Favero M, Prevete I, Scire CA, Bianchi G, Borghi C, Cimmino MA, D'Avola  
19 GM, Desideri G *et al*: **Italian Society of Rheumatology recommendations for the management of**  
20 **gout**. *Reumatismo* 2013, **65**(1):4-21.
- 21  
22 46. Spanish Society of Rheumatology (SER). **Clinical practice guidelines for management of gout**.  
23 Accessed at [https://www.ser.es/wp-content/uploads/2015/09/GuipClinGot\\_1140226\\_EN.pdf](https://www.ser.es/wp-content/uploads/2015/09/GuipClinGot_1140226_EN.pdf) on 28 July  
24 2017.
- 25  
26 47. Hu D, Ding R: **The diagnosis and treatment advice of cardiovascular disease combined**  
27 **asymptomatic hyperuricemia (second edition)**. *Chinese Journal of Cardiovascular Research* 2012,  
28 **10**(4):241-249.
- 29  
30 48. Yamanaka H: **Japanese guideline for the management of hyperuricemia and gout: second edition**.  
31 *Nucleosides, nucleotides & nucleic acids* 2011, **30**(12):1018-1029.
- 32  
33 49. **Ministry of Health Malaysia (MOH). Management of gout**. Accessed at  
34 <http://www.moh.gov.my/penerbitan/CPG2017/3893.pdf> on 28 July 2017.
- 35  
36 50. Li-Yu J, Salido E, Manahan S, Lichauco J, Lorenzo J, Torralba K, Raso A, Roberto L, Santos EP,  
37 Maceda L: **Philippine clinical practice guidelines for the management of gout**. *International journal*  
38 *of rheumatic diseases* 2008, **11**:A362.
- 39  
40 51. Meyers OL, Cassim B, Mody GM: **Hyperuricaemia and gout: clinical guideline 2003**. *South African*  
41 *medical journal = Suid-Afrikaanse tydskrif vir geneeskunde* 2003, **93**(12 Pt 2):961-971.
- 42  
43 52. The University of Texas at Austin, School of Nursing, Family Nurse Practitioner Program.  
44 **Management of initial gout in adults**. Accessed at  
45 <http://www.alabmed.com/uploadfile/2014/0515/20140515070230703.pdf> on 25 July 2017.
- 46  
47 68. Wuthrich H, Alromaih F, So A: **Guidelines for the treatment of gout: a Swiss perspective**. *Swiss*  
48 *medical weekly* 2016, **146**:w14341.
- 49  
50 69. Ceriotti F, Fernandez-Calle P, Klee GG, Nordin G, Sandberg S, Streichert T, Vives-Corrans JL,  
51 Panteghini M: **Criteria for assigning laboratory measurands to models for analytical performance**  
52 **specifications defined in the 1st EFLM Strategic Conference**. *Clinical chemistry and laboratory*  
53 *medicine* 2016.
- 54  
55 70. Liote F: **New therapeutic approach to hyperuricemia and gout in the light of recommendations**.  
56 *Joint, bone, spine : revue du rhumatisme* 2016, **83**(4):376-380.
- 57  
58 71. de Lautour H, Taylor WJ, Adebajo A, Alten R, Burgos-Vargas R, Chapman P, Cimmino MA, da Rocha  
59 Castelar Pinheiro G, Day R, Harrold LR *et al*: **Development of Preliminary Remission Criteria for**  
60 **Gout Using Delphi and 1000Minds Consensus Exercises**. *Arthritis care & research* 2016,  
**68**(5):667-672.
72. De Lautour H, Dalbeth N, Taylor W: **Development of preliminary remission criteria for gout using**  
**Delphi and 1000 minds consensus exercises**. *Arthritis and Rheumatology* 2014, **66**:S68.

- 1  
2  
3  
4  
5  
6  
7  
8  
9  
10  
11  
12  
13  
14  
15  
16  
17  
18  
19  
20  
21  
22  
23  
24  
25  
26  
27  
28  
29  
30  
31  
32  
33  
34  
35  
36  
37  
38  
39  
40  
41  
42  
43  
44  
45  
46  
47  
48  
49  
50  
51  
52  
53  
54  
55  
56  
57  
58  
59  
60
73. Dalbeth N, Winnard D, Gow PJ, Boswell DR, Te Karu L, Lindsay K, Arroll B, Stamp LK: **Urate testing in gout: why, when and how.** *The New Zealand medical journal* 2015, **128**(1420):65-68.
74. Terslev L, Gutierrez M, Schmidt WA, Keen HI, Filippucci E, Kane D, Thiele R, Kaeley G, Balint P, Mandl P *et al*: **Ultrasound as an Outcome Measure in Gout. A Validation Process by the OMERACT Ultrasound Working Group.** *The Journal of rheumatology* 2015, **42**(11):2177-2181.
75. Turk C, Petrik A, Sarica K, Seitz C, Skolarikos A, Straub M, Knoll T: **EAU Guidelines on Diagnosis and Conservative Management of Urolithiasis.** *European urology* 2016, **69**(3):468-474.
76. Stewart Coats AJ, Shewan LG: **Consensus Meeting on "Uric Acid and Cardiovascular Risk" held at University Magna Graecia, Catanzaro, Italy, May 2014. Publication of the Proceedings as a special issue in the International Journal of Cardiology.** *International journal of cardiology* 2016, **213**:1-3.
77. Sullivan PM, William A, Tichy EM: **Hyperuricemia and gout in solid-organ transplant: update in pharmacological management.** *Progress in transplantation (Aliso Viejo, Calif)* 2015, **25**(3):263-270.
78. Gutierrez M, Schmidt WA, Thiele RG, Keen HI, Kaeley GS, Naredo E, Iagnocco A, Bruyn GA, Balint PV, Filippucci E *et al*: **International Consensus for ultrasound lesions in gout: results of Delphi process and web-reliability exercise.** *Rheumatology (Oxford, England)* 2015, **54**(10):1797-1805.
79. Grainger R, Dalbeth N, Keen H, Durcan L, Lawrence Edwards N, Perez-Ruiz F, Diaz-Torne C, Singh JA, Khanna D, Simon LS *et al*: **Imaging as an Outcome Measure in Gout Studies: Report from the OMERACT Gout Working Group.** *The Journal of rheumatology* 2015, **42**(12):2460-2464.
80. Robinson PC, Dalbeth N: **Advances in pharmacotherapy for the treatment of gout.** *Expert opinion on pharmacotherapy* 2015, **16**(4):533-546.
81. Chaudhary K, Malhotra K, Sowers J, Aroor A: **Uric Acid - key ingredient in the recipe for cardiorenal metabolic syndrome.** *Cardiorenal medicine* 2013, **3**(3):208-220.
82. Bakris GL, Doghramji PP, Keenan RT, Silber SH: **CaseBook challenges: Managing gout, hyperuricemia and comorbidities -- dialogue with the experts.** *The American journal of medicine* 2014, **127**(1):S1.
83. Terkeltaub R: **Gout: multinational gout guidelines: how do we move beyond 'deja vu'?** *Nature reviews Rheumatology* 2013, **9**(10):567-569.
84. Lyseng-Williamson KA: **Canakinumab: a guide to its use in acute gouty arthritis flares.** *BioDrugs : clinical immunotherapeutics, biopharmaceuticals and gene therapy* 2013, **27**(4):401-406.
85. Deodhar A: **Update in rheumatology: evidence published in 2012.** *Annals of internal medicine* 2013, **158**(12):903-906.
86. Simao AN, Lozovoy MA, Dichi I: **The uric acid metabolism pathway as a therapeutic target in hyperuricemia related to metabolic syndrome.** *Expert opinion on therapeutic targets* 2012, **16**(12):1175-1187.
87. Stamp LK, Jordan S: **The challenges of gout management in the elderly.** *Drugs & aging* 2011, **28**(8):591-603.
88. Jansen TL, Richette P, Perez-Ruiz F, Tausche AK, Guerne PA, Punzi L, Leeb B, Barskova V, Uhlig T, Pimentao J *et al*: **International position paper on febuxostat.** *Clinical rheumatology* 2010, **29**(8):835-840.
89. Grainger R, Taylor WJ, Dalbeth N, Perez-Ruiz F, Singh JA, Waltrip RW, Schlesinger N, Evans R, Edwards NL, Sivera F *et al*: **Progress in measurement instruments for acute and chronic gout studies.** *The Journal of rheumatology* 2009, **36**(10):2346-2355.
90. Grainger R, Taylor WJ: **Establishing outcome domains for evaluating treatment of acute and chronic gout.** *Current opinion in rheumatology* 2008, **20**(2):173-178.
91. Dalbeth N, Stamp L: **Allopurinol dosing in renal impairment: walking the tightrope between adequate urate lowering and adverse events.** *Seminars in dialysis* 2007, **20**(5):391-395.

- 1  
2  
3  
4  
5  
6  
7  
8  
9  
10  
11  
12  
13  
14  
15  
16  
17  
18  
19  
20  
21  
22  
23  
24  
25  
26  
27  
28  
29  
30  
31  
32  
33  
34  
35  
36  
37  
38  
39  
40  
41  
42  
43  
44  
45  
46  
47  
48  
49  
50  
51  
52  
53  
54  
55  
56  
57  
58  
59  
60
92. Jordan KM, Cameron JS, Snaith M, Zhang W, Doherty M, Seckl J, Hingorani A, Jaques R, Nuki G: **British Society for Rheumatology and British Health Professionals in Rheumatology guideline for the management of gout.** *Rheumatology (Oxford, England)* 2007, **46**(8):1372-1374.
93. Becker G: **The CARI guidelines. Kidney stones: uric acid stones.** *Nephrology (Carlton, Vic)* 2007, **12 Suppl 1**:S21-25.
94. Caramia G, Di Gregorio L, Tarantino ML, Galuffo A, Iacolino R, Caramia M: **Uric acid, phosphate and oxalate stones: treatment and prophylaxis.** *Urologia internationalis* 2004, **72 Suppl 1**:24-28.
95. Terkeltaub RA: **Clinical practice. Gout.** *The New England journal of medicine* 2003, **349**(17):1647-1655.
96. Cleland LG, Hill CL, James MJ: **Diet and arthritis.** *Bailliere's clinical rheumatology* 1995, **9**(4):771-785.
97. Hande KR, Noone RM, Stone WJ: **Severe allopurinol toxicity. Description and guidelines for prevention in patients with renal insufficiency.** *The American journal of medicine* 1984, **76**(1):47-56.
98. **Committee on the Review of Medicines. Recommendations on phenylbutazone, oxyphenbutazone, feprazone, allopurinol, colchicine, probenecid, and sulphinpyrazone.** *British medical journal* 1978, **1**(6125):1466-1467.
99. Mourgues C, Soubrier M, Pereira B, Vorilhon P, Mathieu S: **2012 American guidelines for the management of gout as seen by family doctors in France.** *Annals of the rheumatic diseases* 2016, **75**:1187.
100. Bakris GL, Doghramji PP, Keenan RT, Silber SH: **CaseBook Challenges: Managing Gout, Hyperuricemia and Comorbidities-Dialogue with the Experts.** *American Journal of Medicine* 1970, **127**(1):S1.
101. Pai S, Raslan A, Schlesinger N: **Gout: Update on Current Therapeutics.** *Current Treatment Options in Rheumatology* 2015, **1**(2):131-142.
102. Vargas-Santos AB, Taylor WJ, Neogi T: **Gout Classification Criteria: Update and Implications.** *Current rheumatology reports* 2016, **18 (7) (no pagination)**(46).
103. Filiopoulos V, Hadjiyannakos D, Vlassopoulos D: **Febuxostat renoprotection in CKD patients with asymptomatic hyperuricemia.** *American Journal of Kidney Diseases* 2016, **67**(6):989-990.
104. Chinchilla SP, Urionaguena I, Perez-Ruiz F: **Febuxostat for the chronic management of hyperuricemia in patients with gout.** *Expert Review of Clinical Pharmacology* 2016, **9**(5):665-673.
105. Rimler E, Lom J, Higdon J, Cosco D, Jones D: **A primary care perspective on gout.** *Open Urology and Nephrology Journal* 2016, **9**(Suppl 1: M5):27-34.
106. Saito Y, Stamp LK, Caudle KE, Hershfield MS, McDonagh EM, Callaghan JT, Tassaneeyakul W, Mushiroda T, Kamatani N, Goldspiel BR *et al*: **CPIC: Clinical Pharmacogenetics Implementation Consortium of the Pharmacogenomics Research Network.** *Clinical pharmacology and therapeutics* 2016, **99**(1):36-37.
107. Mody GM: **Update on hyperuricaemia and gout with evidence based management guidelines.** *South African Family Practice* 2015, **57**(4):267-272.
108. Richette P, Pascual E, Doherty M, Barskova V, Becce F, Coyfish M, Janssens H, Jansen T, Liote F, Mallen C *et al*: **Updated EULAR evidence-based recommendations for the diagnosis of gout.** *Annals of the Rheumatic Diseases Conference: Annual European Congress of Rheumatology of the European League Against Rheumatism, EULAR* 2014, **73**(no pagination).
109. Richette P, Doherty M, Pascual E, Barskova V, Becce F, Coyfish M, Janssens H, Jansen T, Liote F, Mallen C *et al*: **Updated EULAR evidence-based recommendations for the management of gout.** *Annals of the Rheumatic Diseases Conference: Annual European Congress of Rheumatology of the European League Against Rheumatism, EULAR* 2014, **73**(no pagination).
110. Gutierrez M, Smith W, Thiele R, Keen H, Kaeley G, Naredo E, Iagnocco A, Bruyn G, Balint P,

- 1  
2  
3  
4  
5  
6  
7  
8  
9  
10  
11  
12  
13  
14  
15  
16  
17  
18  
19  
20  
21  
22  
23  
24  
25  
26  
27  
28  
29  
30  
31  
32  
33  
34  
35  
36  
37  
38  
39  
40  
41  
42  
43  
44  
45  
46  
47  
48  
49  
50  
51  
52  
53  
54  
55  
56  
57  
58  
59  
60
- Filippucci E *et al*: **Defining elementary ultrasound lesions in gout. Preliminary results of delphi consensus and web-exercise reliability.** *Annals of the Rheumatic Diseases Conference: Annual European Congress of Rheumatology of the European League Against Rheumatism, EULAR 2014*, **73**(no pagination).
111. Furst DE, Keystone EC, So AK, Braun J, Breedveld FC, Burmester GR, De Benedetti F, Dorner T, Emery P, Fleischmann R *et al*: **Updated consensus statement on biological agents for the treatment of rheumatic diseases, 2012.** *Annals of the rheumatic diseases* 2013, **72**(SUPPL. 2):ii2-ii34.
112. Hershfield MS, Callaghan JT, Tassaneeyakul W, Mushiroda T, Thorn CF, Klein TE, Lee MTM: **Clinical pharmacogenetics implementation consortium guidelines for human leukocyte antigen-b genotype and allopurinol dosing.** *Clinical pharmacology and therapeutics* 2013, **93**(2):153-158.
113. Andres M, Sivera F, Kydd A, Moi J, Seth R, Sriranganathan MK, Van Durme C, Van Echteld IAAM, Vinik O, Wechalekar MD *et al*: **Multinational evidence-based recommendations for diagnosis and management of gout: Integrating systematic literature research and expert opinion of a broad panel of rheumatologists in the 3E initiative.** *Arthritis and rheumatism* 2012, **64**:S810.
114. Stevenson M, Pandor A: **Febuxostat for the management of hyperuricaemia in patients with gout: A nice single technology appraisal.** *PharmacoEconomics* 2011, **29**(2):133-140.
115. Diaz-Borjon A: **Guidelines for the use of conventional and newer disease-modifying antirheumatic drugs in elderly patients with rheumatoid arthritis.** *Drugs and Aging* 2009, **26**(4):273-293.
116. Furst DE, Keystone EC, Fleischmann R, Mease P, Breedveld FC, Smolen JS, Kalden JR, Braun J, Bresnihan B, Burmester GR *et al*: **Updated consensus statement on biological agents for the treatment of rheumatic diseases, 2009.** *Annals of the rheumatic diseases* 2010, **69**(SUPPL. 1):i2-i29.
117. Taylor WJ, Shewchuk R, Saag KG, Schumacher Jr HR, Singh JA, Grainger R, Edwards NL, Bardin T, Waltrip RW, Simon LS *et al*: **Toward a Valid Definition of Gout Flare: Results of Consensus Exercises Using Delphi Methodology and Cognitive Mapping.** *Arthritis Care and Research* 2009, **61**(4):535-543.
118. Taylor WJ, Schumacher Jr HR, Baraf HSB, Chapman P, Stamp L, Doherty M, McQueen F, Dalbeth N, Schlesinger N, Furst DE *et al*: **A modified Delphi exercise to determine the extent of consensus with OMERACT outcome domains for studies of acute and chronic gout.** *Annals of the rheumatic diseases* 2008, **67**(6):888-891.
119. Bussieres AE, Peterson C, Taylor JAM: **Diagnostic Imaging Guideline for Musculoskeletal Complaints in Adults-An Evidence-Based Approach-Part 2: Upper Extremity Disorders.** *Journal of Manipulative and Physiological Therapeutics* 2008, **31**(1):2-32.
120. Brooks P, Boers M, Simon LS, Strand V, Tugwell P: **Outcome measures in rheumatoid arthritis: The OMERACT process.** *Expert Review of Clinical Immunology* 2007, **3**(3):271-275.
121. Bestermann W, Houston MC, Basile J, Egan B, Ferrario CM, Lackland D, Hawkins RG, Reed J, Rogers P, Wise D *et al*: **Addressing the global cardiovascular risk of hypertension, dyslipidemia, diabetes mellitus, and the metabolic syndrome in the Southeastern United States, part II: Treatment recommendations for management of the global cardiovascular risk of hypertension, dyslipidemia, diabetes mellitus, and the metabolic syndrome.** *American Journal of the Medical Sciences* 2005, **329**(6):292-305.
122. Schumacher Jr HR: **Management strategies for osteoarthritis, ankylosing spondylitis, and gouty arthritis.** *Journal of Clinical Rheumatology* 2004, **10**(3 SUPPL.):S18-S25.
123. Bartlett JG: **Guidelines section.** *Infectious Diseases in Clinical Practice* 2002, **11**(8):467-471.
124. Furst DE, Keystone EC, So AK, Braun J, Breedveld FC, Burmester GR, De Benedetti F, Dörner T, Emery P, Fleischmann R: **Updated consensus statement on biological agents for the treatment of rheumatic diseases, 2012.** *Annals of the rheumatic diseases* 2013, **72**(suppl 2):ii2-ii34.
125. Newberry SJ, FitzGerald JD, Motala A, Booth M, Maglione MA, Han D, Tariq A, O'hanlon CE,

- 1 Shanman R, Dudley W: **Diagnosis of gout: a systematic review in support of an American College**  
2 **of Physicians clinical practice guideline.** *Annals of internal medicine* 2017, **166**(1):27-36.
- 3  
4 126. Shekelle PG, Newberry SJ, FitzGerald JD, Motala A, O'hanlon CE, Tariq A, Okunogbe A, Han D,  
5 Shanman R: **Management of gout: a systematic review in support of an American College of**  
6 **Physicians clinical practice guideline.** *Annals of internal medicine* 2017, **166**(1):37-51.
- 7  
8 127. Sandberg S, Fraser CG, Horvath AR, Jansen R, Jones G, Oosterhuis W, Petersen PH, Schimmel H,  
9 Sikaris K, Panteghini M: **Defining analytical performance specifications: consensus statement**  
10 **from the 1st Strategic Conference of the European Federation of Clinical Chemistry and**  
11 **Laboratory Medicine.** *Clinical Chemistry and Laboratory Medicine (CCLM)* 2015, **53**(6):833-835.
- 12  
13 128. Kallinich T, Haffner D, Niehues T, Huss K, Lainka E, Neudorf U, Schaefer C, Stojanov S, Timmann C,  
14 Keitzer R: **Colchicine use in children and adolescents with familial Mediterranean fever:**  
15 **literature review and consensus statement.** *Pediatrics* 2007, **119**(2):e474-e483.
- 16  
17 129. Preminger GM, Tiselius H-G, Assimos DG, Alken P, Buck C, Gallucci M, Knoll T, Lingeman JE,  
18 Nakada SY, Pearle MS: **2007 guideline for the management of ureteral calculi.** *The Journal of*  
19 *urology* 2007, **178**(6):2418-2434.
- 20  
21 130. National Institute for Health and Care Excellence (NICE). **Febuxostat for the management of**  
22 **hyperuricaemia in people with gout.** Assessed at nice.org.uk/guidance/ta164 on 25 July 2017.
- 23  
24 131. Phoon, R and Johnson, D. **Medical therapies to reduce chronic kidney disease progression and**  
25 **cardiovascular risk: uric acid-lowering agents.** Accessed at  
26 [http://www.cari.org.au/CKD/CKD%20early/Medical\\_Th\\_Uric\\_Acid-lowering.pdf](http://www.cari.org.au/CKD/CKD%20early/Medical_Th_Uric_Acid-lowering.pdf) on 23 July 2017.
- 27  
28 132. Li Q, Yu P: **The diagnosis and treatment of gout.** *Int J Endocrinol Metab* 2011, **31**(5):289-291.
- 29  
30 133. zhang X, Zhang Z: **Advice for the diagnosis and treatment for gout.** *Chin J Rheumatol* 2013,  
31 **17**(8):631.
- 32  
33 134. Deng X, Zhang Z: **OMERACT Ultrasound Gout Task Force group released the international**  
34 **consensus for ultrasound lesions in gout.** *Chin J Rheumatol* 2016, **20**(3):216.
- 35  
36 135. Chinese Rheumatology Association (CRA). **Guideline for the diagnosis and tretment for primary**  
37 **gout (draft).** *Chin J Rheumatol.* 2004:8(3): 178-181 (Original document in Chinese).
- 38  
39 136. Chinese College of Cardiovascular Physicians (CCCP). **The diagnosis and treatment advice of**  
40 **cardiovascular disease combined asymptomatic hyperuricemia (second edition).** Accessed at  
41 <http://www.alabmed.com/uploadfile/2014/0121/20140121022919976.pdf> on 20 July 2017 (Original  
42 document in Chinese).
- 43  
44 137. Chinese Rheumatology Association (CRA). **Guideline for the diagnosis and tretment for primary**  
45 **gout (draft).** *Chin J Rheumatol.* 2011:15(6): 410-413 (Original document in Chinese).
- 46  
47 138. World Health Organization (WHO). **Standard treatment guidelines and essential drugs list for**  
48 **South Africa.** Accessed at <http://apps.who.int/medicinedocs/documents/s18259en/s18259en.pdf> on 23  
49 July 2017.
- 50  
51 139. European Medicines Agency (EMA). **Concept paper on the need of the guideline on clinical**  
52 **investigation of medicinal products for the treatment of gout.** Accessed at  
53 [http://www.ema.europa.eu/docs/en\\_GB/document\\_library/Scientific\\_guideline/2012/06/WC500128670](http://www.ema.europa.eu/docs/en_GB/document_library/Scientific_guideline/2012/06/WC500128670.pdf)  
54 .pdf on 23 July 2017.
- 55  
56 140. Agency for Healthcare Research and Quality (AHRQ). **Diagnosis and Management of Gout:**  
57 **Current State of the Evidence.** Accessed at  
58 [https://effectivehealthcare.ahrq.gov/sites/default/files/pdf/gout\\_clinician.pdf](https://effectivehealthcare.ahrq.gov/sites/default/files/pdf/gout_clinician.pdf) on 25 July 2017.
- 59  
60 141. Agency for Healthcare Research and Quality (AHRQ). **Diagnosis of Gout.** Accessed at  
61 [https://effectivehealthcare.ahrq.gov/sites/default/files/pdf/gout\\_research-2016.pdf](https://effectivehealthcare.ahrq.gov/sites/default/files/pdf/gout_research-2016.pdf) on 25 July 2017.
142. National Institute for Health and Care Excellence (NICE). **Pegloticase for treating severe debilitating**  
**chronic tophaceous gout.** Assessed at nice.org.uk/guidance/ta291 on 25 July 2017.

- 1  
2  
3  
4  
5  
6  
7  
8  
9  
10  
11  
12  
13  
14  
15  
16  
17  
18  
19  
20  
21  
22  
23  
24  
25  
26  
27  
28  
29  
30  
31  
32  
33  
34  
35  
36  
37  
38  
39  
40  
41  
42  
43  
44  
45  
46  
47  
48  
49  
50  
51  
52  
53  
54  
55  
56  
57  
58  
59  
60
143. Agency for Healthcare Research and Quality (AHRQ). **Diagnosis of gout**. Assessed at [www.effectivehealthcare.ahrq.gov/reports/fnal.cfm](http://www.effectivehealthcare.ahrq.gov/reports/fnal.cfm) on 25 July 2017.
144. Buckinghamshire Formulary, National Health Service (NHS). **781FM.1 Febuxostat**. Accessed at [http://www.bucksformulary.nhs.uk/docs/Guideline\\_781FM.pdf](http://www.bucksformulary.nhs.uk/docs/Guideline_781FM.pdf) on 25 July 2017.
145. Canadian Expert Drug Advisory Committee (CEDAC). **Febuxostat**. Accessed at [https://www.cadth.ca/media/cdr/complete/cdr\\_complete\\_Uloric\\_April-29-11.pdf](https://www.cadth.ca/media/cdr/complete/cdr_complete_Uloric_April-29-11.pdf) on 25 July 2017.
146. Dalhousie CME Academic Detailing Service. **Gout: Update 2013**. Accessed at [https://cdn.dal.ca/content/dam/dalhousie/pdf/faculty/medicine/departments/core-units/cpd/academic-detailing/Gout\\_workbook.pdf](https://cdn.dal.ca/content/dam/dalhousie/pdf/faculty/medicine/departments/core-units/cpd/academic-detailing/Gout_workbook.pdf) on 23 July 2017.
147. Lancashire Medicines Management Group, National Health Service (NHS). **Gout Management Summary Guidelines (Version 1.1)**. Accessed at [http://www.lancsmmg.nhs.uk/download/guidelines/Gout%20Prescribing%20Guidance%20\(Versio%201.1\).pdf](http://www.lancsmmg.nhs.uk/download/guidelines/Gout%20Prescribing%20Guidance%20(Versio%201.1).pdf) on 25 July 2017.



# PRISMA 2009 Checklist

| Section/topic                      | #  | Checklist item                                                                                                                                                                                                                                                                                              | Reported on page # |
|------------------------------------|----|-------------------------------------------------------------------------------------------------------------------------------------------------------------------------------------------------------------------------------------------------------------------------------------------------------------|--------------------|
| <b>TITLE</b>                       |    |                                                                                                                                                                                                                                                                                                             |                    |
| Title                              | 1  | Identify the report as a systematic review, meta-analysis, or both.                                                                                                                                                                                                                                         | 1                  |
| <b>ABSTRACT</b>                    |    |                                                                                                                                                                                                                                                                                                             |                    |
| Structured summary                 | 2  | Provide a structured summary including, as applicable: background; objectives; data sources; study eligibility criteria, participants, and interventions; study appraisal and synthesis methods; results; limitations; conclusions and implications of key findings; systematic review registration number. | 3-4                |
| <b>INTRODUCTION</b>                |    |                                                                                                                                                                                                                                                                                                             |                    |
| Rationale                          | 3  | Describe the rationale for the review in the context of what is already known.                                                                                                                                                                                                                              | 6-7                |
| Objectives                         | 4  | Provide an explicit statement of questions being addressed with reference to participants, interventions, comparisons, outcomes, and study design (PICOS).                                                                                                                                                  | 7                  |
| <b>METHODS</b>                     |    |                                                                                                                                                                                                                                                                                                             |                    |
| Protocol and registration          | 5  | Indicate if a review protocol exists, if and where it can be accessed (e.g., Web address), and, if available, provide registration information including registration number.                                                                                                                               | 7                  |
| Eligibility criteria               | 6  | Specify study characteristics (e.g., PICOS, length of follow-up) and report characteristics (e.g., years considered, language, publication status) used as criteria for eligibility, giving rationale.                                                                                                      | 8                  |
| Information sources                | 7  | Describe all information sources (e.g., databases with dates of coverage, contact with study authors to identify additional studies) in the search and date last searched.                                                                                                                                  | 7                  |
| Search                             | 8  | Present full electronic search strategy for at least one database, including any limits used, such that it could be repeated.                                                                                                                                                                               | 7                  |
| Study selection                    | 9  | State the process for selecting studies (i.e., screening, eligibility, included in systematic review, and, if applicable, included in the meta-analysis).                                                                                                                                                   | 8                  |
| Data collection process            | 10 | Describe method of data extraction from reports (e.g., piloted forms, independently, in duplicate) and any processes for obtaining and confirming data from investigators.                                                                                                                                  | 8                  |
| Data items                         | 11 | List and define all variables for which data were sought (e.g., PICOS, funding sources) and any assumptions and simplifications made.                                                                                                                                                                       | 8                  |
| Risk of bias in individual studies | 12 | Describe methods used for assessing risk of bias of individual studies (including specification of whether this was done at the study or outcome level), and how this information is to be used in any data synthesis.                                                                                      | 8-9                |
| Summary measures                   | 13 | State the principal summary measures (e.g., risk ratio, difference in means).                                                                                                                                                                                                                               | 8-9                |
| Synthesis of results               | 14 | Describe the methods of handling data and combining results of studies, if done, including measures of consistency (e.g., $I^2$ ) for each meta-analysis.                                                                                                                                                   | 8-9                |



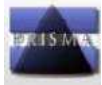

# PRISMA 2009 Checklist

Page 1 of 2

| Section/topic                 | #  | Checklist item                                                                                                                                                                                           | Reported -on page # |
|-------------------------------|----|----------------------------------------------------------------------------------------------------------------------------------------------------------------------------------------------------------|---------------------|
| Risk of bias across studies   | 15 | Specify any assessment of risk of bias that may affect the cumulative evidence (e.g., publication bias, selective reporting within studies).                                                             | 8-9                 |
| Additional analyses           | 16 | Describe methods of additional analyses (e.g., sensitivity or subgroup analyses, meta-regression), if done, indicating which were pre-specified.                                                         | 8-9                 |
| <b>RESULTS</b>                |    |                                                                                                                                                                                                          |                     |
| Study selection               | 17 | Give numbers of studies screened, assessed for eligibility, and included in the review, with reasons for exclusions at each stage, ideally with a flow diagram.                                          | 9                   |
| Study characteristics         | 18 | For each study, present characteristics for which data were extracted (e.g., study size, PICOS, follow-up period) and provide the citations.                                                             | 10                  |
| Risk of bias within studies   | 19 | Present data on risk of bias of each study and, if available, any outcome level assessment (see item 12).                                                                                                | 10-12               |
| Results of individual studies | 20 | For all outcomes considered (benefits or harms), present, for each study: (a) simple summary data for each intervention group (b) effect estimates and confidence intervals, ideally with a forest plot. | 12-16               |
| Synthesis of results          | 21 | Present results of each meta-analysis done, including confidence intervals and measures of consistency.                                                                                                  | 12-16               |
| Risk of bias across studies   | 22 | Present results of any assessment of risk of bias across studies (see Item 15).                                                                                                                          | 12                  |
| Additional analysis           | 23 | Give results of additional analyses, if done (e.g., sensitivity or subgroup analyses, meta-regression [see Item 16]).                                                                                    | 11                  |
| <b>DISCUSSION</b>             |    |                                                                                                                                                                                                          |                     |
| Summary of evidence           | 24 | Summarize the main findings including the strength of evidence for each main outcome; consider their relevance to key groups (e.g., healthcare providers, users, and policy makers).                     | 16                  |
| Limitations                   | 25 | Discuss limitations at study and outcome level (e.g., risk of bias), and at review-level (e.g., incomplete retrieval of identified research, reporting bias).                                            | 19-20               |
| Conclusions                   | 26 | Provide a general interpretation of the results in the context of other evidence, and implications for future research.                                                                                  | 20-21               |
| <b>FUNDING</b>                |    |                                                                                                                                                                                                          |                     |
| Funding                       | 27 | Describe sources of funding for the systematic review and other support (e.g., supply of data); role of funders for the systematic review.                                                               | 21-22               |

From: Moher D, Liberati A, Tetzlaff J, Altman DG, The PRISMA Group (2009). Preferred Reporting Items for Systematic Reviews and Meta-Analyses: The PRISMA Statement. PLoS Med 6(7): e1000097. doi:10.1371/journal.pmed1000097

For more information, visit: [www.prisma-statement.org](http://www.prisma-statement.org).

# BMJ Open

## Diagnosis and treatment for hyperuricemia and gout: a systematic review of clinical practice guidelines and consensus statements

|                                 |                                                                                                                                                                                                                                                                                                                                                                                                                                                                                                                                                                                                                                                                                                                                                                                                                                                                                                                                                                                                                                                                                                                                                                                                                                                                                                                                                                                                                                                                                                                                                                   |
|---------------------------------|-------------------------------------------------------------------------------------------------------------------------------------------------------------------------------------------------------------------------------------------------------------------------------------------------------------------------------------------------------------------------------------------------------------------------------------------------------------------------------------------------------------------------------------------------------------------------------------------------------------------------------------------------------------------------------------------------------------------------------------------------------------------------------------------------------------------------------------------------------------------------------------------------------------------------------------------------------------------------------------------------------------------------------------------------------------------------------------------------------------------------------------------------------------------------------------------------------------------------------------------------------------------------------------------------------------------------------------------------------------------------------------------------------------------------------------------------------------------------------------------------------------------------------------------------------------------|
| Journal:                        | <i>BMJ Open</i>                                                                                                                                                                                                                                                                                                                                                                                                                                                                                                                                                                                                                                                                                                                                                                                                                                                                                                                                                                                                                                                                                                                                                                                                                                                                                                                                                                                                                                                                                                                                                   |
| Manuscript ID                   | bmjopen-2018-026677.R2                                                                                                                                                                                                                                                                                                                                                                                                                                                                                                                                                                                                                                                                                                                                                                                                                                                                                                                                                                                                                                                                                                                                                                                                                                                                                                                                                                                                                                                                                                                                            |
| Article Type:                   | Research                                                                                                                                                                                                                                                                                                                                                                                                                                                                                                                                                                                                                                                                                                                                                                                                                                                                                                                                                                                                                                                                                                                                                                                                                                                                                                                                                                                                                                                                                                                                                          |
| Date Submitted by the Author:   | 23-Jun-2019                                                                                                                                                                                                                                                                                                                                                                                                                                                                                                                                                                                                                                                                                                                                                                                                                                                                                                                                                                                                                                                                                                                                                                                                                                                                                                                                                                                                                                                                                                                                                       |
| Complete List of Authors:       | <p>Li, Qianrui; Sichuan University West China Hospital, Department of Endocrinology and Metabolism</p> <p>Li, Xiaodan; Sichuan University West China Hospital, Department of Gastroenterology</p> <p>Wang, Jing; Sichuan University West China Hospital, Department of Oto-Rhino-Laryngology</p> <p>Liu, Hongdie; Sichuan University West China Hospital, Department of Endocrinology and Metabolism</p> <p>Kwong, Joey; Prince of Wales Hospital, The Chinese University of Hong Kong, Jockey Club School of Public Health and Primary Care</p> <p>Chen, Hao; Nanjing University of Chinese Medicine, The second clinical college</p> <p>Li, Ling; West China Hospital, Sichuan University, Chinese Evidence-based Medicine Center</p> <p>Chung, Sheng-Chia; The Farr Institute of Health Informatics Research and Institute of Health Informatics, University College London</p> <p>Shah, Anoop; University College London, Farr Institute of Health Informatics Research</p> <p>Chen, Yaolong; School of Basic Medical Sciences, Lanzhou University, Evidence-Based Medicine Center</p> <p>An, Zhenmei; Sichuan University West China Hospital, Department of Endocrinology and Metabolism</p> <p>Sun, Xin; West China Hospital, Sichuan University, Chinese Evidence-based Medicine Center</p> <p>Hemingway, Harry; UCL, Epidemiology and Public Health</p> <p>Tian, Hao-Ming; Department of Endocrinology, West China Hospital, Sichuan University</p> <p>Li, Sheyu; Department of Endocrinology and Metabolism, West China Hospital, Sichuan University</p> |
| <b>Primary Subject Heading</b>: | Diabetes and endocrinology                                                                                                                                                                                                                                                                                                                                                                                                                                                                                                                                                                                                                                                                                                                                                                                                                                                                                                                                                                                                                                                                                                                                                                                                                                                                                                                                                                                                                                                                                                                                        |
| Secondary Subject Heading:      | Diabetes and endocrinology                                                                                                                                                                                                                                                                                                                                                                                                                                                                                                                                                                                                                                                                                                                                                                                                                                                                                                                                                                                                                                                                                                                                                                                                                                                                                                                                                                                                                                                                                                                                        |
| Keywords:                       | Clinical practice guideline, Hyperuricemia, Gout, Systematic review                                                                                                                                                                                                                                                                                                                                                                                                                                                                                                                                                                                                                                                                                                                                                                                                                                                                                                                                                                                                                                                                                                                                                                                                                                                                                                                                                                                                                                                                                               |
|                                 |                                                                                                                                                                                                                                                                                                                                                                                                                                                                                                                                                                                                                                                                                                                                                                                                                                                                                                                                                                                                                                                                                                                                                                                                                                                                                                                                                                                                                                                                                                                                                                   |

1  
2  
3  
4  
5  
6  
7  
8  
9  
10  
11  
12  
13  
14  
15  
16  
17  
18  
19  
20  
21  
22  
23  
24  
25  
26  
27  
28  
29  
30  
31  
32  
33  
34  
35  
36  
37  
38  
39  
40  
41  
42  
43  
44  
45  
46  
47  
48  
49  
50  
51  
52  
53  
54  
55  
56  
57  
58  
59  
60



1  
2  
3  
4 **Diagnosis and treatment for hyperuricemia and gout: a systematic**  
5 **review of clinical practice guidelines and consensus statements**  
6  
7  
8

9 **Running title:** AGREE II assessment for hyperuricemia and gout guidelines  
10  
11

12  
13 Qianrui Li<sup>1,2#</sup>, Xiaodan Li<sup>3#</sup>, Jing Wang<sup>4</sup>, Hongdie Liu<sup>1</sup>, Joey Sum-Wing  
14 Kwong<sup>5</sup>, Hao Chen<sup>6</sup>, Ling Li<sup>7</sup>, Sheng-Chia Chung<sup>2</sup>, Anoop Dinesh Shah<sup>2,8,9,10</sup>,  
15 Yaolong Chen<sup>11</sup>, Zhenmei An<sup>1</sup>, Xin Sun<sup>7</sup>, Harry Hemingway<sup>2,9,10</sup>, Haoming  
16 Tian<sup>1\*</sup>, Sheyu Li<sup>1,12\*</sup>  
17  
18  
19  
20  
21  
22

23 1 Department of Endocrinology and Metabolism, West China Hospital,  
24 Sichuan University, Chengdu, 610041, China  
25

26 2 Institute of Health Informatics, University College London, 222 Euston Road,  
27 London NW1 2DA  
28

29 3 Department of Gastroenterology, West China Hospital, Sichuan University,  
30 Chengdu, 610041, China  
31

32 4 Department of Oto-Rhino-Laryngology, West China Hospital, Sichuan  
33 University, Chengdu, 610041, China  
34

35 5 Jockey Club School of Public Health and Primary Care, Prince of Wales  
36 Hospital, The Chinese University of Hong Kong, Hong Kong, China  
37

38 6 The Second Clinical College, Nanjing University of Chinese Medicine,  
39 Nanjing, 210046, China  
40

41 7 Chinese Evidence-based Medicine Center, West China Hospital, Sichuan  
42 University, Chengdu, 610041, China  
43

44 8 University College London Hospitals NHS Trust, London, United Kingdom  
45

46 9 Health Data Research UK London, University College London, 222 Euston  
47 Road, London NW1 2DA, United Kingdom  
48

49 10 The National Institute for Health Research University College London  
50 Hospitals Biomedical Research Centre, University College London, 222  
51 Euston Road, London NW1 2DA, UK  
52  
53  
54  
55  
56  
57  
58  
59  
60

1  
2  
3  
4 11 Evidence-Based Medicine Center, School of Basic Medical Sciences,  
5  
6 Lanzhou University, Lanzhou, China

7  
8 12 Division of Population Health and Genomics, Ninewells Hospital and  
9  
10 School of Medicine, University of Dundee, Dundee, Angus, DD1 9SY,  
11  
12 Scotland, United Kingdom

13  
14  
15 # These two authors contributed equally to this work.

16  
17 \* Corresponding authors: Dr. Sheyu Li (lisheyu@gmail.com or  
18  
19 lisheyu@scu.edu.cn or s.r.li@dundee.ac.uk) and Professor Haoming Tian  
20  
21 (hmtian999@126.com), Department of Endocrinology and Metabolism, West  
22  
23 China Hospital, Sichuan University, 37# Guoxue Road, Chengdu, 610041,  
24  
25 Sichuan, China.  
26  
27  
28  
29  
30  
31  
32  
33  
34  
35  
36  
37  
38  
39  
40  
41  
42  
43  
44  
45  
46  
47  
48  
49  
50  
51  
52  
53  
54  
55  
56  
57  
58  
59  
60

## ABSTRACT

### Objectives

Despite the publication of hundreds of trials on gout and hyperuricemia, management of these conditions remains suboptimal. We aimed to assess the quality and consistency of guidance documents for gout and hyperuricemia.

### Design

Systematic review and quality assessment using the Appraisal of Guidelines for Research and Evaluation (AGREE) II methodology.

### Data Sources

PubMed and EMBASE (27 October 2016), two Chinese academic databases, eight guideline databases, and Google and Google scholar (July 2017).

### Eligibility Criteria

We included the latest version of international and national/regional clinical practice guidelines and consensus statements for diagnosis and/or treatment of hyperuricemia and gout, published in English or Chinese.

### Data Extraction and Synthesis

Two reviewers independently screened searched items and extracted data.

Four reviewers independently scored documents using AGREE II.

Recommendations from all documents were tabulated and visualized in a coloured grid.

### Results

Twenty-four guidance documents (16 clinical practice guidelines and 8 consensus statements) published between 2003 and 2017 were included. Included documents performed well in the domains of scope and purpose (median 85.4%, range 66.7%-100.0%) and clarity of presentation (median 81.3%, range 48.6%-98.6%), but unsatisfied in applicability (median 9.9%, range 0.0%-66.7%) and editorial independence (median 28.1%, range 0.0%-83.3%). The 2017 British Society of Rheumatology guideline received the highest scores. Recommendations were concordant on the target serum uric acid level for long-term control, on some indications for urate-lowering

1  
2  
3  
4 therapy, and on the first-line drugs for urate-lowering therapy and for acute  
5 attack. Substantially inconsistent recommendations were provided for many  
6 items, especially for the timing of initiation of urate-lowering therapy and for  
7 treatment for asymptomatic hyperuricemia.  
8  
9  
10

### 11 **Conclusions**

12  
13 Methodological quality needs improvement in guidance documents on gout  
14 and hyperuricemia. Evidence for certain clinical questions is lacking, despite  
15 numerous trials in this field. Promoting standard guidance development  
16 methods and synthesizing high-quality clinical evidence are potential  
17 approaches to reduce recommendation inconsistencies.  
18  
19  
20  
21  
22

### 23 **Study registration**

24  
25 PROSPERO (CRD42016046104).  
26  
27  
28

### 29 **Keywords**

30  
31 Clinical practice guideline, Hyperuricemia, Gout, Systematic review  
32  
33  
34  
35  
36  
37  
38  
39  
40  
41  
42  
43  
44  
45  
46  
47  
48  
49  
50  
51  
52  
53  
54  
55  
56  
57  
58  
59  
60

## STRENGTHS AND LIMITATIONS OF THIS STUDY

1. The first systematic review to assess the quality of clinical practice guidelines and consensus statements on the diagnosis and treatment for both hyperuricemia and gout.
2. The first systematic review to summarise recommendations for best practice in hyperuricemia and gout.
3. The Appraisal of Guidelines for Research and Evaluation (AGREE) II instrument is an international, structured, validated, and rigorously developed tool.
4. Only guidance documents in English and Chinese were included.
5. Literature search was more than one year old at the time of publication.



## BACKGROUND

Gout is an inflammatory arthritis occurring in response to monosodium urate (MSU) crystals formation, a common and necessary pathogenic factor of which is hyperuricemia. The prevalence of gout and hyperuricemia [1-4], as well as their disease burden [5, 6], are rising globally. However, although more than six hundred related clinical studies [7] have been published to date, the quality of care for gout and hyperuricemia remains suboptimal. The goal of treatment is to reduce the body's total uric acid pool [8, 9] and consequently to minimize the risk of acute flares, arthropathy, nephrolithiasis, and other complications [7, 10, 11]. A study in the United States found that only 22% of patients with gout received therapy adhering to all quality indicators [12]. A nationwide population study in the United Kingdom reported that only 48% of prevalent patients received proper consultation and only 27% of incident patients were provided with urate-lowering therapy (ULT) within one year of diagnosis [6].

High-quality guidance documents are important for improving the quality of care for gout and hyperuricemia at individual, community, and national levels [13]. Current guidance documents for gout and hyperuricemia have been developed by rheumatology, endocrinology, and cardiology groups, at regional, national or international levels. Among these documents, the American College of Rheumatology (ACR) guidelines [14, 15], updated in 2012, and the European League Against Rheumatism (EULAR) guidelines [16-18], updated in 2016, have the most substantial global influence. The most recent documents (released in 2017) are two national guidelines, from the American College of Physicians (ACP) [19, 20] and the British Society of Rheumatology (BSR) [21], and one consensus statement, from the Chinese Multi-disciplinary Expert Task Force on Hyperuricemia and Its Related Diseases [22].

1  
2  
3  
4 Despite the variety of documents, current guidelines and consensuses on gout  
5 and hyperuricemia provide inconsistent recommendations, even those  
6 released by highly respected professional organizations, such as the ACP and  
7 the ACR [23]. Some distinct differences lie in key aspects for patient care, such  
8 as the pharmacological treatment for asymptomatic hyperuricemic patients,  
9 the timing of initiation of ULT in patients with gout flare [24], and indications for  
10 ULT [25]. These discrepancies may result from ethnic and social differences,  
11 but can be a consequence of inconsistent guideline development [23].  
12  
13 Low-quality guidance documents put individual patients and communities at  
14 risk, and impede the application of guideline recommendations in clinical  
15 practice [26]. Hence, we conducted this study to systematically evaluate the  
16 quality of clinical practice guidelines and consensus statements on gout and  
17 hyperuricemia and to compare key recommendations on patient care from all  
18 included documents.  
19  
20  
21  
22  
23  
24  
25  
26  
27  
28  
29  
30  
31  
32

## 33 **METHODS**

34 Detailed methods of the study have been published previously [27] and this  
35 study was registered with PROSPERO (registration number:  
36 CRD42016046104).  
37  
38  
39  
40  
41  
42

### 43 **Literature search and selection criteria**

44 We systematically searched PubMed and EMBASE from inception to 27  
45 October 2016 using a comprehensive search strategy (Supplementary Table 1  
46 and Supplementary Table 2) to identify guidelines and consensus  
47 recommendations pertaining to the diagnosis and treatment of gout and  
48 hyperuricemia. We searched two academic databases for Chinese  
49 publications (the Chinese Biomedical Literature Database and the Wanfang  
50 Data) and eight guideline databases from inception to 24 July 2017 using  
51 search strategies tailored to different databases (Supplementary Table 3). We  
52 also searched Google and Google scholar in July 2017 for potentially eligible  
53  
54  
55  
56  
57  
58  
59  
60

1  
2  
3  
4 guidelines and consensus recommendations that were not indexed in the  
5  
6  
7  
8  
9  
10  
11  
12  
13  
14  
15  
16  
17  
18  
19  
20  
21  
22  
23  
24  
25  
26  
27  
28  
29  
30  
31  
32  
33  
34  
35  
36  
37  
38  
39  
40  
41  
42  
43  
44  
45  
46  
47  
48  
49  
50  
51  
52  
53  
54  
55  
56  
57  
58  
59  
60

guidelines and consensus recommendations that were not indexed in the  
aforementioned databases.

We included the latest versions of all international and national/regional clinical  
practice guidelines and consensus statements for the diagnosis and/or  
treatment of gout and hyperuricemia, published in English or Chinese. Two  
reviewers (Q.L., X.L.) independently screened all searched documents.  
Reasons for exclusion were provided for documents excluded during the  
full-text review (Supplementary Table 4). Disagreements were resolved  
through discussion with a third reviewer (S.L.).

### **Data extraction**

We extracted the following data from each included document: document  
characteristics (e.g., year of publication, funding body, and evidence base),  
recommendations for diagnosis and monitoring of gout and hyperuricemia, and  
recommendations for management. Data were extracted by one investigator  
(Q.L.) and checked by another (X.L.).

### **Appraisal of guidance documents**

All included documents were assessed by four reviewers (Q.L., X.L., J.W., and  
H.L.) independently using the Appraisal of Guidelines for Research and  
Evaluation (AGREE) II instrument [28]. AGREE II is an internationally  
developed and validated tool to evaluate the quality of clinical practice  
guidelines [29-31] and consensus statements [32, 33].

All reviewers completed an online training tutorial [34] before the  
commencement of appraisal to ensure standardization. We adapted detailed  
instructions for scoring from the AGREE II User's Manual [28] and provided  
objective scoring criteria for each item (Supplementary File 1). We selected  
four guidance documents for pilot scoring, during which we discussed and

1  
2  
3  
4 clarified our objective scoring criteria. When scoring for all included documents  
5 was completed, a meeting was held among reviewers and every item with  
6 scores differed more than one point was discussed. After the meeting,  
7 reviewers were given the opportunity to revise their scores or to keep the  
8 original scores. We recorded all original scores, revised scores, and reasons  
9 for modifying scores for quality control purpose, and used the intra-class  
10 correlation coefficient (ICC) to test inter-rater reliability. The ICC was  
11 calculated via IBM SPSS (IBM Co., Armonk, New York, USA) and an ICC  $\geq 0.7$   
12 was considered acceptable [35].  
13  
14  
15  
16  
17  
18  
19  
20  
21  
22

### 23 **Recommendation synthesis**

24 We manually extracted recommendations on key clinical questions from all  
25 included guidance documents and summarized them into four tables: a) the  
26 diagnosis of gout and hyperuricemia, b) the treatment of hyperuricemia, c) the  
27 treatment of acute gout, and d) the treatment of tophi. Recommendations were  
28 extracted by one investigator (Q.L.) and checked by another (X.L.). We further  
29 visualized these recommendations in a five-colour grid to illustrate  
30 inconsistencies. The most frequently recommended content was used as a  
31 reference. We used green to colour documents providing consistent  
32 recommendations, red to colour those providing contrary recommendations,  
33 and blue to colour those providing partially consistent recommendations. A  
34 partially consistent recommendation was defined as a recommendation that  
35 included but not the same as the reference content. Where recommendations  
36 were not given or were not applicable, the cell was coloured in yellow and in  
37 grey, respectively.  
38  
39  
40  
41  
42  
43  
44  
45  
46  
47  
48  
49  
50  
51  
52  
53

### 54 **Patient involvement**

55 Patients or the public were not involved in the conceptualisation or carrying out  
56 of this research.  
57  
58  
59  
60

## RESULTS

### Search results

Overall, we identified 5811 items across academic databases, guideline databases, Google, and Google Scholar. After applying the inclusion and exclusion criteria, 24 guidance documents from 26 papers [14-22, 36-52] were included in the final appraisal and recommendation synthesis (Figure 1).

Studies excluded after full-text review and reasons for exclusion were provided as Supplementary Table 4.

### Characteristics of included guidelines and consensus statements

Table 1 summarized characteristics of included guidance documents, among which 16 were clinical practice guidelines [14-21, 38, 41, 44-46, 48-52] and eight were consensus statements [22, 36, 37, 39, 40, 42, 43, 47]. 16 national or regional organizations and three international groups (i.e., the 3e [Evidence, Expertise, Exchange] Initiative, the EULAR, and the development group for the Treat-to-target [T2T] recommendations) published these documents between 2003 to 2017. 16 documents [14-18, 21, 22, 36-38, 40, 42, 43, 45, 46, 49, 50] were issued by rheumatology organizations and seven [16-18, 36, 39, 42, 43] were developed by multinational development groups. 17 documents [14-18, 21, 22, 36, 38-41, 43-46, 49, 51] provided information on their guideline development group, among which 11 [14-17, 19-21, 36, 41-43, 45, 46] explicitly stated the involvement of a methodologist. 12 documents [14-18, 21, 22, 38-41, 43-46, 49, 51] provided information on their target audience, among which only three [16, 38, 44] considered patients as one of the target audiences. 18 documents [14-21, 36, 39-43, 45, 46, 48-52] conducted systematic literature review as part of their development process, among which 17 documents [14-21, 36, 39-41, 43, 45, 46, 48-52] reported the level of evidence supporting recommendations and 16 [16-21, 36, 39-41, 43, 45, 46, 48-52] graded the strength of recommendations. Ten documents [16, 19-21, 39, 42, 46, 48, 49, 51, 52] clearly stated being externally reviewed. Five [19-21,

1  
2  
3  
4 46, 49, 50] provided a clear time of update plan. 12 documents [14, 15, 17-21,  
5  
6 36, 39, 42, 46, 49, 51, 52] provided information on their funding body, among  
7  
8 which six [17, 36, 39, 46, 49, 51] were fully or partially funded by the  
9  
10 pharmaceutical industry and the rest did not clearly declare their funding body.  
11

### 12 13 **Appraisal of guidelines and consensus statements**

14  
15 Standardized AGREE II domain scores for each guidance document were  
16  
17 shown as Figure 2 and were provided in value as Supplementary Table 5.  
18  
19 Scores for each AGREE II item were provided in mean as Supplementary  
20  
21 Table 6 and in detail as Supplementary Table 7. The overall quality of  
22  
23 guidance documents, as assessed by AGREE II, varied both between  
24  
25 documents across domains and within documents between domains. The  
26  
27 document with the highest domain scores was the gout management guideline  
28  
29 published by the BSR in 2017 [21], with five domains scoring above the upper  
30  
31 quartile, followed by the guidelines published by the ACP in 2017 [19, 20], and  
32  
33 the 2015 gout classification criteria by the ACR and the EULAR jointly [42],  
34  
35 both with four domains scoring above the upper quartile. Guidelines did not  
36  
37 always score higher than consensus statements. No tendency of improvement  
38  
39 in the quality score over time was observed (Supplementary Figure 1).  
40

41  
42 The AGREE II instrument evaluated guidelines and consensus statements in  
43  
44 six domains, from the development, dissemination, to implementation. The  
45  
46 scope and purpose (domain 1) of a document clarifies its clinical questions.  
47  
48 Proper involvement of stakeholders (domain 2) balances individuals' biases.  
49  
50 The rigour of development domain (domain 3) is most concerned by clinicians  
51  
52 and ensures the validity of development methodology [53]. Clearly presented  
53  
54 recommendations (domain 4) conveyed precise and accessible information  
55  
56 from the development group to clinicians. Good performances in the  
57  
58 applicability domain (domain 5) and the editorial independence domain  
59  
60 (domain 6) guarantee the usefulness and the independence of documents.

1  
2  
3  
4  
5  
6  
7  
8  
9  
10  
11  
12  
13  
14  
15  
16  
17  
18  
19  
20  
21  
22  
23  
24  
25  
26  
27  
28  
29  
30  
31  
32  
33  
34  
35  
36  
37  
38  
39  
40  
41  
42  
43  
44  
45  
46  
47  
48  
49  
50  
51  
52  
53  
54  
55  
56  
57  
58  
59  
60

Guidance documents received the highest scores for the scope and purpose domain (median 85.42%, range 66.67% to 100.00%) and the clarity of presentation domain (median 79.17%, range 48.61% to 98.61%), and the lowest scores for the applicability domain (median 10.94%, range 0.00% to 66.67%) and the editorial independence domain (median 28.13%, range 0.00% to 83.33%). The worst scored item was the monitoring or auditing criteria item (mean score 1.2, range 1.0-4.0), followed by the implementation advice or tools item (mean 1.7, range 1.0-4.8), the external review item (mean 2.1, range 1.0-6.0), and the updating procedure item (mean 2.1, range 1.0-6.5).

The ICC was 0.896. Group discussion modified 365/2208 (16.53%) of individual scores.

### **Synthesis of recommendations**

Included guidance documents addressed four major themes: diagnosis of gout and hyperuricemia, treatment for hyperuricemia, treatment for acute gout attack, and treatment for tophi. Figure 3 showed key recommendations and their inconsistencies.

### **Approaches to diagnostic strategies for gout and hyperuricemia**

Thirteen guidance documents [17-20, 22, 36, 38, 40-43, 46, 49, 51] covered the diagnosis of gout and 11 [17, 22, 37, 38, 45-51] covered that of hyperuricemia. Supplementary Table 8 showed key recommendations. The identification of MSU crystals in synovial fluid or tophi was a gold standard for definite diagnosis, as recommended by all included documents. In the absence of MSU crystals, three aspects were commonly evaluated for gout diagnosis, namely the clinical manifestation, considered by all documents; the laboratory result, considered by all but one document [49]; and the imaging

1  
2  
3  
4 result, considered by all but four documents [17, 19, 20, 49, 51].  
5  
6

7  
8 Guidance documents differed when recommending the cut-off serum uric acid  
9 (SUA) level to diagnose hyperuricemia. Four documents [38, 47, 48, 51]  
10 recommended 7.0 mg/dL (or 420  $\mu\text{mol/L}$ ) as the cut-off, while two [17, 45]  
11 preferred 6.8 mg/dL in the general population. Five documents [22, 37, 46, 49,  
12 50] provided gender-specific cut-offs, recommending 6.0 mg/dL (or 360  
13  $\mu\text{mol/L}$ ) in female and 7.0 mg/dL (or 420  $\mu\text{mol/L}$ ) in male. Asymptomatic  
14 hyperuricemia was defined in seven [36, 38, 46-50] documents, among which  
15 six [36, 38, 46-48, 50] excluded patients with gout and two [36, 48] excluded  
16 patients with tophi when making the diagnosis. Attitudes were inconsistent for  
17 renal diseases. Patients with renal diseases were not eligible for the diagnosis  
18 of asymptomatic hyperuricemia in the Japanese [48] and the Philippine [50]  
19 guidelines, but patients with pre-existing renal or cardiovascular diseases were  
20 eligible in the 3e initiative document [36].  
21  
22  
23  
24  
25  
26  
27  
28  
29  
30  
31  
32  
33

### 34 **Approaches to treatment for hyperuricemia**

35  
36 Twenty-two guidance documents [14-17, 19-22, 36-41, 43-52] covered the  
37 treatment for hyperuricemia and Supplementary Table 9 summarized key  
38 recommendations. All but three documents [19, 20, 44, 52] explicitly  
39 recommended target levels for long-term SUA control, most of which stated  
40 6.0 mg/dL (or 360  $\mu\text{mol/L}$ ), except the South African guideline [51] which  
41 stated 5.0mg/dL (300  $\mu\text{mol/L}$ ). Two documents [16, 22] recommended a lower  
42 limit of 3.0 mg/dL (or 180  $\mu\text{mol/L}$ ) for long-term SUA management. Only the  
43 2016 EULAR guideline [16] explained the reason for providing a lower limit  
44 was that low SUA might increase the risk of neurodegenerative diseases, but  
45 the level of evidence and the grade of recommendation were both low.  
46  
47  
48  
49  
50  
51  
52  
53  
54  
55  
56

57  
58 All but six guidance documents [36, 39, 40, 43, 44, 52] provided indications for  
59 long-term ULT. The most commonly recommended indications were recurrent  
60



1  
2  
3  
4 attacks [14-17, 19-22, 41, 45, 48-51], tophi [14-17, 19-22, 38, 41, 45, 48-51],  
5 urate nephrolithiasis [14-17, 19-22, 37, 38, 49, 50], arthropathy [16, 17, 21, 22,  
6 38, 41, 45, 49], and comorbidities [14-16, 19-22, 37, 47, 49, 50]. The definition  
7 of recurrent attacks varied from at least once per year [17] to at least three  
8 times per year [49], while the majority of documents [14-16, 19-21, 41]  
9 recommended twice per year as the cut-off.  
10  
11  
12  
13  
14  
15  
16

17 Regarding the timing to initiate ULT, the documents did not agree on whether  
18 to start pharmacological ULT after an acute attack [17, 21, 22, 36-38, 40, 48,  
19 49, 51, 52] or during an attack [14, 15, 37]. When recommending to start ULT  
20 after an attack, the preferred time to wait since the attack resolved varied from  
21 two weeks [37, 48] to six weeks [52]. All guidance documents based this  
22 recommendation on expert opinions due to insufficient evidence. When  
23 recommending not to start ULT during an attack, guidance documents  
24 explained that ULT was better discussed when a patient was not painful [21],  
25 and that ULT initiation could prolong or worsen the acute attack [51]. Two  
26 documents [16, 39] explicitly presented the currently conflicting views and  
27 insufficient evidence and stated consequently no recommendation for this  
28 issue.  
29  
30  
31  
32  
33  
34  
35  
36  
37  
38  
39  
40  
41  
42

43 When pharmacological ULT options were provided with prioritization,  
44 allopurinol was recommended by all guidance documents [14-17, 21, 36, 40,  
45 43, 45, 46, 48-50] to be the first-line drug, while febuxostat was recommended  
46 by three documents [14, 15, 17, 46] to be the first-line and by six documents  
47 [16, 21, 36, 40, 43, 45] to be the second-line. However, recommendations on  
48 the dosage of allopurinol varied largely. The maximum daily allopurinol dose  
49 recommended varied from 300 mg [51], 600 mg [22, 37, 47], 800 mg [14, 15,  
50 17, 38, 45], to 900 mg [21, 43, 46], and the daily starting dose recommended in  
51 patients with normal renal function varied from 50 mg [19, 20, 22, 47, 48, 51] to  
52 200 mg [21]. As for patients with impaired renal function, the cut-off to initiate  
53  
54  
55  
56  
57  
58  
59  
60

1  
2  
3  
4 dose adjustment was provided diversely as creatinine clearance (CCr) 20-140  
5 mL/min [37, 45, 46, 49, 51], or estimated glomerular filtration rate (eGFR) 130  
6 ml/min/1.73m<sup>2</sup> [21]. One document preferred to depend allopurinol dose solely  
7 on eGFR by limiting the maximum daily dose to 1.5 mg/eGFR in patients with  
8 renal impairment [22]. HLA-B\*5801 gene screening prior to allopurinol use was  
9 recommended by five guidance documents [14, 15, 21, 22, 37, 38].  
10  
11  
12  
13  
14  
15  
16

17 For patients with asymptomatic hyperuricemia, 14 guidance documents [14,  
18 15, 17, 21, 36-40, 43, 47-49, 51, 52] commented on the option of  
19 pharmacological ULT, among which, five [17, 21, 38, 51, 52] explicitly  
20 recommended no treatment under any circumstances. Three documents  
21 [47-49] recommended pharmacological treatments in asymptomatic  
22 hyperuricemia patients with comorbidities [47, 48] or with very high SUA levels  
23 [40, 47-49], but their cut-off SUA level to indicate ULT varied from 8.0 mg/dL  
24 [47, 48] to 13.0 mg/dL [49]. The Portuguese consensus [40] was incoherent  
25 itself by recommending no pharmacological treatment in general, but  
26 recommending pharmacological ULT for patients with SUA higher than 9  
27 mg/dL. No direct evidence was provided by any document to support  
28 pharmacological treatment for asymptomatic hyperuricemia, and such  
29 recommendations were only made in concern of the onset of gout [40] and the  
30 risk of cardiovascular events [47, 48].  
31  
32  
33  
34  
35  
36  
37  
38  
39  
40  
41  
42  
43  
44  
45  
46

### 47 **Approaches to treatment for acute gout attack**

48 Twenty-one guidance documents [14-17, 19-22, 36-41, 43-46, 48-52] covered  
49 the treatment for acute gout attack and Supplementary Table 10 summarized  
50 their key recommendations. Non-steroidal anti-inflammatory drugs (NSAIDs)  
51 was recommended by all but three documents [19, 20, 39, 44] as the first line  
52 pharmacological treatment, while colchicine by 11 documents [14-17, 21, 22,  
53 36, 37, 40, 43, 45, 48]. Colchicine was recommended to be given in a fixed  
54 dose by three documents [38, 40, 48] and in a loading dose followed by  
55  
56  
57  
58  
59  
60

1  
2  
3  
4 different doses by six documents [14-17, 19, 20, 22, 38, 51, 52]. Seven  
5 documents [21, 36, 41, 43, 45, 49, 50] only recommended the total daily dose  
6 for colchicine, regardless of the regimen, and their doses recommended varied  
7 from 1 mg [21, 49, 50] to 2.4 mg [49]. One document [43] surprisingly  
8 recommended 1.8 g in 24 hours without any further explanation, which was  
9 likely a typo. Systemic steroids were recommended by all but three documents  
10 [37, 39, 44], among which six [14-17, 19, 20, 36, 43] recommended them as  
11 the first-line option and ten [21, 22, 38, 41, 45, 46, 48, 50-52] recommended  
12 them when NSAIDs and colchicine were contraindicated or intolerant.  
13 Intra-articular steroids injection was recommended by 14 documents [14-17,  
14 21, 22, 36, 38, 40, 43, 45, 46, 49, 51, 52], among which five [14-16, 21, 36, 43]  
15 clearly recommended it as the first-line option.  
16  
17  
18  
19  
20  
21  
22  
23  
24  
25  
26  
27  
28

### 29 **Approaches to treatment for tophi**

30  
31 Twenty-one guidance documents [14-17, 19-22, 36-41, 43-46, 48-52] covered  
32 treatment for tophi and Supplementary Table 11 showed their key  
33 recommendations. Surgery was recommended by nine documents [22, 36, 38,  
34 40, 43, 48, 49, 51], among which five [22, 36, 38, 43, 49] explicitly presented its  
35 indications, most commonly nerve compression [22, 36, 38, 43] and infection  
36 [36, 38, 43]. The risk for surgery was discussed by one document [51] and only  
37 the risk of delayed wound healing was stated. Long-term ULT was  
38 recommended by all but two documents [44, 52], but pharmacological  
39 treatment was only explicitly recommended by eight of them [15-17, 21, 37, 43,  
40 46, 51].  
41  
42  
43  
44  
45  
46  
47  
48  
49  
50  
51

## 52 **DISCUSSION**

### 53 **Principal findings and interpretations**

54  
55 This systematic review, including 16 guidelines and eight consensus  
56 statements, found generally low methodological quality and inconsistent  
57 recommendations from guidance documents covering the diagnosis and  
58  
59  
60

1  
2  
3  
4 management of gout and hyperuricemia. During revision of our work, the  
5 English version of two documents, from the Chinese Multidisciplinary Expert  
6 Task Force on Hyperuricemia and Related Diseases [54] and the Taiwan  
7 Rheumatologist Association [55], respectively, were released. Despite  
8  
9 increase in the number of guidance documents published between 2003 and  
10  
11 2017, the quality of documents in all domains did not seem to improve with  
12  
13 time. To date, this is the first systematic appraisal for the quality of guidelines  
14  
15 and consensus statements pertaining to both gout and hyperuricemia.  
16  
17  
18  
19  
20

### 21 **Comparison with existing research**

22  
23 Guidance documents assessed in our study performed well in the domains of  
24 scope and purpose (domain 1) and clarity of presentation (domain 4), but  
25 poorly in the domain of applicability (domain 5). These results were consistent  
26  
27 with two previous reviews [56, 57], one of which systematically assessed the  
28  
29 quality of all guidelines for gout and the other assessed three documents  
30  
31 released respectively by the 3e initiative [36], the ACR [14, 15], and the  
32  
33 EULAR [18, 58]. Our study systematically included both guidelines and  
34  
35 consensus statements in the field of both gout and hyperuricemia, and the  
36  
37 differential performance by domain was shared across both type of document.  
38  
39  
40  
41

42  
43 This distribution of AGREE II domain scores has been observed by many  
44  
45 previous guideline appraisal studies, in which documents scored higher in the  
46  
47 scope and purpose domain and the clarity of presentation domain, and lower  
48  
49 in the applicability domain and the editorial independence domain. This  
50  
51 domain score distribution was not only shared by guidance documents for  
52  
53 endocrinology diseases, such as diabetes [59, 60] and thyroid disorders [31,  
54  
55 61], and rheumatology diseases, such as rheumatoid arthritis [32, 62, 63] and  
56  
57 systemic lupus erythematosus [64], but also shared by documents for  
58  
59 diseases in other clinical specialities [33, 65-67]. Despite generally low and  
60  
varied scores in the applicability domain, guidance documents for gout and

1  
2  
3  
4 hyperuricemia performed obviously poorer comparing to documents for other  
5 conditions [31-33, 59-61, 63-67], suggesting that improving the usefulness of  
6 guidance being more challenging in gout and hyperuricemia. One major  
7 impediment to good applicability of guidance document is the time and cost to  
8 perform economic evaluations and pilot studies, and a stable and long-term  
9 task force of guideline development is required to conduct these evaluations  
10 and studies. Although forming such a task force is practically difficult in some  
11 regions and countries, guidance documents were suggested to at least inform  
12 audience the need to consider these issues [65]. Low scores in the editorial  
13 independence domain often resulted from lacking of detailed information on  
14 the influence of funding body and on the conflict of interests. We found that  
15 50% of documents declaring funding sources were supported by the  
16 pharmaceutical industry, calling for awareness of the potential influence of  
17 pharmaceutical industry on the synthesis of clinical guidance and for the need  
18 of promoting transparency in financial declaration.  
19  
20  
21  
22  
23  
24  
25  
26  
27  
28  
29  
30  
31  
32  
33  
34

### 35 **Clinical implications and future research**

36 Guidance documents were concordant and recommended a target for SUA <  
37 6.0 mg/dL (or 360  $\mu$ mol/L) for long-term control, to consider recurrent attacks  
38 as one of the indications for ULT (although the definitions for recurrent attacks  
39 differed), to consider allopurinol as the first-line ULT and NSAIDs as the  
40 first-line drug in acute attack, and to consider long-term ULT in patient with  
41 tophi. Despite these similarities, recommendations differed in the majority of  
42 items and these discrepancies might come from several sources, including  
43 ethnic difference, quality of documents, and lack of evidence.  
44  
45  
46  
47  
48  
49  
50  
51  
52  
53

54 Ethnical and social differences are important reasons why recommendations  
55 may vary between guidelines and consensus, and such diversity is to be  
56 encouraged in order to best meet the needs of local populations. Ethnicity  
57 differences explain the tendency for Asian guidance documents to positively  
58  
59  
60

1  
2  
3  
4 recommend HLA-B\*5801 gene screening before prescribing allopurinol [22,  
5  
6 37, 38]. The risk of hypersensitivity reactions associated with allopurinol is  
7  
8 significantly increased in individuals carrying the variant allele HLA-B\*5801,  
9  
10 the frequency of which in Han Chinese, Korean, and Tai people are higher  
11  
12 than that in the Caucasian population [14, 15, 21]. Studies suggested that  
13  
14 HLA-B\*5801 gene screening prior to allopurinol initiation is cost-effective for  
15  
16 Asians but not Caucasians [68, 69]. Providing ethnicity-specific  
17  
18 recommendations or explicitly specifying the ethnicity of target audience helps  
19  
20 clarify this source of inconsistency and improves the precision of  
21  
22 recommendations.

23  
24  
25 However, low methodological quality of guidance documents may also lead to  
26  
27 discrepant recommendations and consequent variability in application.  
28  
29 Documents with high quality (i.e., scoring above the upper quartile in at least  
30  
31 three out of the six AGREE II domains) [16, 19-21, 36, 42, 46], included  
32  
33 ambiguous prioritization of ULT drugs for hyperuricemia and of steroid options  
34  
35 for acute attack those with low quality (i.e., scoring below the lower quartile in  
36  
37 at least three out of the six AGREE II domains) [22, 37, 38, 44, 47, 52]  
38  
39 provided. Among all domains assessed by the AGREE II instrument, those  
40  
41 pertaining to stakeholder involvement, rigor of development, applicability and  
42  
43 editorial independence could be primarily improved by standardizing  
44  
45 developing processes, which consequently improved the reliability of  
46  
47 recommendations. These results reinforced that it is better for clinicians to  
48  
49 refer to high-quality guidance documents instead of the low-quality ones.  
50  
51 However, when high-quality documents are unavailable in local language,  
52  
53 referring to low-quality local documents might mislead clinical practice in the  
54  
55 region. Selecting appropriate guidance documents to follow in clinical practice  
56  
57 is thus more challenging for non-English speaking countries, including China  
58  
59 [13]. Moreover, the oldest document included in our study was the South  
60  
African Medical Association guideline, published in 2003, and no guidance

document in either English or Chinese was released in South African in the past 16 years. This finding suggested that some old documents might still affect regional practice. Efforts to timely update or declare the withdrawal of existing guidance documents are also critical for clinical practice.

Guidance documents are considered as the starting point to identify evidence gaps and to prioritize research questions [70]. Evidence gaps were discussed in the recommendations of treatment for asymptomatic hyperuricemia, by five [14, 15, 36, 37, 39, 43] out of 14 documents [14, 15, 17, 21, 36-40, 43, 47-49, 51, 52], and of timing to initiate ULT, by two [16, 39] out of 14 documents [14-17, 21, 22, 36-40, 48, 49, 51, 52]. Although the rest of documents provided explicit recommendations, they based their recommendations either on indirect evidence or expert opinions. As for gout and hyperuricemia, evidence synthesis is warranted for the effects of pharmacological ULT in patients with asymptomatic hyperuricemia and for the optimal timing to initiate ULT in patients with the acute attack.

### **Strengths and limitations**

Strengths of our review included a systematic approach to identify guidance documents pertaining to the diagnosis and management of hyperuricemia and gout. Both guidelines and consensus statements were evaluated and compared. We used the AGREE II instrument, an international, validated and rigorously developed tool, to assess the quality of document development and we tailored the AGREE II instrument to point-by-point scoring criteria (Supplementary File 1) to improve the objectivity and reproducibility of our study. We summarized all key recommendations, and compared and visualized the inconsistencies among them, providing a concise but informative overview for clinicians and researchers.

Our study also has limitations. Firstly, we only included documents published

1  
2  
3  
4 in English or Chinese, which could lead to a risk of neglecting essential  
5 documents from regions not using English or Chinese as the first language.  
6  
7 We attempted to mitigate this risk by tailoring our search strategy to identify the  
8 English versions of guidance documents published from these regions.  
9  
10 Secondly, unconscious bias from a subjective rating of documents was  
11 inevitable. We avoided inviting co-authors of guidance documents as  
12 reviewers to prevent subconscious competing interest, and conducted two  
13 rounds of group discussions to minimize subjective bias. Thirdly, the AGREE II  
14 instrument itself has weaknesses [31, 59, 67, 71], although it was the most  
15 commonly used tool to assess the quality of guidance documents. The AGREE  
16 system assigned equal weight to all six domains, regardless of their relative  
17 importance [72]. Although better methods of guideline development and  
18 greater transparency of reporting are associated with more reliable  
19 recommendations, they do not guarantee better patient outcomes. Hence, the  
20 quality scores assessed by the AGREE II should be interpreted with caution,  
21 especially when used to indicate which guidelines to follow in clinical practice.  
22  
23 Moreover, the subjective interpretation of scoring criteria impeded the  
24 replicability of AGREE II studies and direct comparison of quality scores in  
25 guidance documents provided by different reviews. Fourthly, our literature  
26 search was over 12 months old when the study was ready to publish, affecting  
27 the timeliness of our study. However, we decided not to update the literature at  
28 a late stage of the study, because of the infeasibility of bringing together all  
29 reviewers with another round of centralized training and appraisal, and the risk  
30 of inconsistent scoring criteria for each reviewer after a long time since their  
31 previous scoring. Moreover, a quick review of publications in PubMed, using  
32 the same search strategy (Supplementary table 1) and limiting the publication  
33 date from 1 September 2016 to 21 January 2019, did not found any new  
34 relevant documents, reassuring us of the timeliness of our study.  
35  
36  
37  
38  
39  
40  
41  
42  
43  
44  
45  
46  
47  
48  
49  
50  
51  
52  
53  
54  
55  
56  
57  
58  
59  
60

## CONCLUSIONS



1  
2  
3  
4 The methodological quality needs to be improved in the current guidelines and  
5  
6 consensuses on the diagnosis and management of gout and hyperuricemia,  
7  
8 as assessed by the AGREE II. Inconsistent recommendations are common,  
9  
10 even in some key aspects. Promoting standard methods for guidance  
11  
12 documents development, and synthesizing high-quality clinical evidence to fill  
13  
14 in evidence gaps, are warranted to improve the quality of guidance documents.  
15  
16

### 17 **COMPETING INTERESTS**

18  
19 The authors declare that they have no competing interests.  
20  
21  
22

### 23 **FUNDING**

24  
25 This research received no specific funding from any bodies in the public,  
26  
27 commercial, or not-for-profit sectors. Xiaodan Li is supported by the Talents  
28  
29 Cultivation Fund of West China Hospital. Anoop Shah is supported by the  
30  
31 National Institute for Health Research (NIHR) University College London  
32  
33 Hospitals Biomedical Research Centre and a THIS Institute postdoctoral  
34  
35 fellowship. Harry Hemingway is a NIHR Senior Investigator. His work is  
36  
37 supported by: 1. Health Data Research UK, which is funded by the UK Medical  
38  
39 Research Council, Engineering and Physical Sciences Research Council,  
40  
41 Economic and Social Research Council, Department of Health and Social  
42  
43 Care (England), Chief Scientist Office of the Scottish Government Health and  
44  
45 Social Care Directorates, Health and Social Care Research and Development  
46  
47 Division (Welsh Government), Public Health Agency (Northern Ireland), British  
48  
49 Heart Foundation and Wellcome Trust. 2. The BigData@Heart Consortium,  
50  
51 funded by the Innovative Medicines Initiative-2 Joint Undertaking under grant  
52  
53 agreement No. 116074. This Joint Undertaking receives support from the  
54  
55 European Union's Horizon 2020 research and innovation programme and  
56  
57 EFPIA; it is chaired, by DE Grobbee and SD Anker, partnering with 20  
58  
59 academic and industry partners and ESC. 3. The NIHR University College  
60  
London Hospitals Biomedical Research Centre. Sheyu Li was supported by

1  
2  
3 grants from the National Natural Science Foundation of China [grant number  
4 81400811 and 21534008], National Basic Research Program of China [grant  
5 number 2015CB942800], Sichuan Science and Technology Program [grant  
6 number 2019YFH0150], the Scientific Research Project of Health and Family  
7 Planning Commission of Sichuan Province [grant number 130029, 150149,  
8 17PJ063 and 17PJ445], Cholesterol Fund by China Cardiovascular  
9 Foundation and China Heart House and the International Visiting Program for  
10 Excellent Young Scholars of Sichuan University. Haoming Tian and Sheyu Li  
11 was both supported by 1.3.5 Project for Disciplines of Excellence, West China  
12 Hospital, Sichuan University [grant number ZYGD18022].  
13  
14  
15  
16  
17  
18  
19  
20  
21  
22  
23  
24

## 25 **AUTHORS' CONTRIBUTIONS**

26 HT and SL conceived this study. QL, JSWK, and SL designed the  
27 inclusion/exclusion criteria and the searching resource and strategy. QL,  
28 JSWK, HC, LL, and XS designed the appraisal strategy of each included  
29 guideline and consensus. QL and XL searched literature search and extracted  
30 data. QL, XL, JW, HL, and SL assessed the quality of each document. QL  
31 analysed and visualized the outcomes. SC, AS, YC, AZ, XS, and HH provided  
32 critical review. QL, XL, and SL drafted the manuscript. All authors discussed  
33 actively in the protocol of the study.  
34  
35  
36  
37  
38  
39  
40  
41  
42  
43  
44

## 45 **DATA AVAILABILITY**

46 All data in this paper were obtained from published studies. No additional data  
47 are available from the authors.  
48  
49  
50  
51  
52  
53  
54  
55  
56  
57  
58  
59  
60

## REFERENCES

1. Lawrence RC, Felson DT, Helmick CG, Arnold LM, Choi H, Deyo RA, Gabriel S, Hirsch R, Hochberg MC, Hunder GG: **Estimates of the prevalence of arthritis and other rheumatic conditions in the United States: Part II.** *Arthritis & Rheumatology* 2008, **58**(1):26-35.
2. Liu R, Han C, Wu D, Xia X, Gu J, Guan H, Shan Z, Teng W: **Prevalence of hyperuricemia and gout in mainland China from 2000 to 2014: a systematic review and meta-analysis.** *BioMed research international* 2015, **2015**.
3. Kuo C-F, Grainge MJ, Zhang W, Doherty M: **Global epidemiology of gout: prevalence, incidence and risk factors.** *Nature reviews rheumatology* 2015, **11**(11):649.
4. Smith E, March L: **Global prevalence of hyperuricemia: a systematic review of population-based epidemiological studies.** *Arthritis & Rheumatology* 2015, **67**:2690-2692.
5. Smith E, Hoy D, Cross M, Merriman TR, Vos T, Buchbinder R, Woolf A, March L: **The global burden of gout: estimates from the Global Burden of Disease 2010 study.** *Annals of the rheumatic diseases* 2014, **73**(8):1470-1476.
6. Kuo C-F, Grainge MJ, Mallen C, Zhang W, Doherty M: **Rising burden of gout in the UK but continuing suboptimal management: a nationwide population study.** *Annals of the rheumatic diseases* 2014:annrheumdis-2013-204463.
7. Li X, Meng X, Timofeeva M, Tzoulaki I, Tsilidis KK, Ioannidis P, Campbell H, Theodoratou E: **Serum uric acid levels and multiple health outcomes: umbrella review of evidence from observational studies, randomised controlled trials, and Mendelian randomisation studies.** *BMJ (Clinical research ed)* 2017, **357**:j2376.
8. Tausche A-K, Jansen TL, Schröder H-E, Bornstein SR, Aringer M, Müller-Ladner U: **Gout—current diagnosis and treatment.** *Deutsches*

- 1  
2  
3  
4  
5  
6  
7  
8  
9  
10  
11  
12  
13  
14  
15  
16  
17  
18  
19  
20  
21  
22  
23  
24  
25  
26  
27  
28  
29  
30  
31  
32  
33  
34  
35  
36  
37  
38  
39  
40  
41  
42  
43  
44  
45  
46  
47  
48  
49  
50  
51  
52  
53  
54  
55  
56  
57  
58  
59  
60
- Aerzteblatt International* 2009, **106**(34-35):549.
9. Dincer HE, Dincer AP, Levinson DJ: **Asymptomatic hyperuricemia: to treat or not to treat.** *Cleveland Clinic journal of medicine* 2002, **69**(8):594-608.
10. Pittman JR, Bross MH: **Diagnosis and management of gout.** *American family physician* 1999, **59**(7):1799-1806, 1810.
11. Perez-Ruiz F, Lioté F: **Lowering serum uric acid levels: what is the optimal target for improving clinical outcomes in gout?** *Arthritis care & research* 2007, **57**(7):1324-1328.
12. Singh JA, Hodges JS, Toscano JP, Asch SM: **Quality of care for gout in the US needs improvement.** *Arthritis care & research* 2007, **57**(5):822-829.
13. Chen Y, Wang C, Shang H, Yang K, Norris SL: **Clinical practice guidelines in China.** *BMJ (Clinical research ed)* 2018, **360**:j5158.
14. Khanna D, Fitzgerald JD, Khanna PP, Bae S, Singh MK, Neogi T, Pillinger MH, Merrill J, Lee S, Prakash S *et al*: **2012 American College of Rheumatology guidelines for management of gout. Part 1: systematic nonpharmacologic and pharmacologic therapeutic approaches to hyperuricemia.** *Arthritis care & research* 2012, **64**(10):1431-1446.
15. Khanna D, Khanna PP, Fitzgerald JD, Singh MK, Bae S, Neogi T, Pillinger MH, Merrill J, Lee S, Prakash S *et al*: **2012 American college of rheumatology guidelines for management of gout. part 2: Therapy and antiinflammatory prophylaxis of acute gouty arthritis.** *Arthritis Care and Research* 2012, **64**(10):1447-1461.
16. Richette P, Doherty M, Pascual E, Barskova V, Becce F, Castaneda-Sanabria J, Coyfish M, Guillo S, Jansen TL, Janssens H *et al*: **2016 updated EULAR evidence-based recommendations for the management of gout.** *Annals of the rheumatic diseases* 2016.

- 1  
2  
3  
4 17. Hamburger M, Baraf HS, Adamson TC, 3rd, Basile J, Bass L, Cole B,  
5  
6  
7  
8  
9  
10  
11  
12  
13  
14  
15  
16  
17  
18  
19  
20  
21  
22  
23  
24  
25  
26  
27  
28  
29  
30  
31  
32  
33  
34  
35  
36  
37  
38  
39  
40  
41  
42  
43  
44  
45  
46  
47  
48  
49  
50  
51  
52  
53  
54  
55  
56  
57  
58  
59  
60  
20. Qaseem A, Harris RP, Forciea MA: **Management of acute and  
recurrent gout: a clinical practice guideline from the American  
College of Physicians.** *Annals of internal medicine* 2017,  
**166(1):58-68.**
17. Hamburger M, Baraf HS, Adamson TC, 3rd, Basile J, Bass L, Cole B,  
Doghramji PP, Guadagnoli GA, Hamburger F, Harford R *et al*: **2011  
Recommendations for the diagnosis and management of gout and  
hyperuricemia.** *Postgraduate medicine* 2011, **123(6 Suppl 1):3-36.**
18. Zhang W, Doherty M, Pascual E, Bardin T, Barskova V, Conaghan P,  
Gerster J, Jacobs J, Leeb B, Liote F *et al*: **EULAR evidence based  
recommendations for gout. Part I: Diagnosis. Report of a task  
force of the Standing Committee for International Clinical Studies  
Including Therapeutics (ESCSIT).** *Annals of the rheumatic diseases*  
2006, **65(10):1301-1311.**
19. Qaseem A, McLean RM, Starkey M, Forciea MA: **Diagnosis of acute  
gout: a clinical practice guideline from the American College of  
Physicians.** *Annals of internal medicine* 2017, **166(1):52-57.**
20. Qaseem A, Harris RP, Forciea MA: **Management of acute and  
recurrent gout: a clinical practice guideline from the American  
College of Physicians.** *Annals of internal medicine* 2017,  
**166(1):58-68.**
21. Hui M, Carr A, Cameron S, Davenport G, Doherty M, Forrester H,  
Jenkins W, Jordan KM, Mallen CD, McDonald TM: **The British Society  
for Rheumatology guideline for the management of gout.**  
*Rheumatology* 2017, **56(7):1056-1059.**
22. Multi-disciplinary Expert Task Force on Hyperuricemia and Its Related  
Diseases. **Chinese multi-disciplinary consensus on the diagnosis  
and treatment of hyperuricemia and its related diseases.** *Chin J  
Intern Med.* 2017: **56(3): 235-248** (Original document in Chinese).
23. McLean RM: **The long and winding road to clinical guidelines on  
the diagnosis and management of gout.** *Annals of internal medicine*  
2017, **166(1):73-74.**
24. Bardin T, Richette P: **Crystal arthritis: new ACR guidelines for gout  
management hold some surprises.** *Nature Reviews Rheumatology*

- 2013, **9**(1):9.
25. Dalbeth N, Bardin T, Doherty M, Lioté F, Richette P, Saag KG, So AK, Stamp LK, Choi HK, Terkeltaub R: **Discordant American College of Physicians and international rheumatology guidelines for gout management: consensus statement of the Gout, Hyperuricemia and Crystal-Associated Disease Network (G-CAN)**. *Nature Reviews Rheumatology* 2017, **13**(9):561.
26. Khanna PP, FitzGerald J: **Evolution of management of gout: a comparison of recent guidelines**. *Current opinion in rheumatology* 2015, **27**(2):139-146.
27. Li Q, Li X, Kwong JS-W, Chen H, Sun X, Tian H, Li S: **Diagnosis and treatment for hyperuricaemia and gout: a protocol for a systematic review of clinical practice guidelines and consensus statements**. *BMJ open* 2017, **7**(6):e014928.
28. Brouwers MC, Kho ME, Browman GP, Burgers JS, Cluzeau F, Feder G, Fervers B, Graham ID, Grimshaw J, Hanna SE: **AGREE II: advancing guideline development, reporting and evaluation in health care**. *Canadian Medical Association Journal* 2010, **182**(18):E839-E842.
29. Nuckols TK, Anderson L, Popescu I, Diamant AL, Doyle B, Di Capua P, Chou R: **Opioid prescribing: a systematic review and critical appraisal of guidelines for chronic pain**. *Annals of internal medicine* 2014, **160**(1):38-47.
30. Deng Y, Luo L, Hu Y, Fang K, Liu J: **Clinical practice guidelines for the management of neuropathic pain: a systematic review**. *BMC anesthesiology* 2015, **16**(1):12.
31. Huang T-W, Lai J-H, Wu M-Y, Chen S-L, Wu C-H, Tam K-W: **Systematic review of clinical practice guidelines in the diagnosis and management of thyroid nodules and cancer**. *BMC medicine* 2013, **11**(1):191.

- 1  
2  
3  
4 32. Lopez-Olivo MA, Kallen MA, Ortiz Z, Skidmore B, Suarez-Almazor ME:  
5  
6 **Quality appraisal of clinical practice guidelines and consensus**  
7 **statements on the use of biologic agents in rheumatoid arthritis: a**  
8 **systematic review.** *Arthritis care & research* 2008, **59**(11):1625-1638.  
9  
10  
11  
12 33. Nagler EV, Vanmassenhove J, van der Veer SN, Nistor I, Van Biesen  
13 W, Webster AC, Vanholder R: **Diagnosis and treatment of**  
14 **hyponatremia: a systematic review of clinical practice guidelines**  
15 **and consensus statements.** *BMC medicine* 2014, **12**(1):231.  
16  
17  
18  
19 34. **AGREE II training tools. Accessed at**  
20 **<http://www.agreetrust.org-resource-centre-agree-ii-training-tooles/>**  
21 **on 01 August 2017.**  
22  
23  
24  
25 35. Brouwers MC, Kho ME, Browman GP, Burgers JS, Cluzeau F, Feder G,  
26 Fervers B, Graham ID, Hanna SE, Makarski J: **Development of the**  
27 **AGREE II, part 1: performance, usefulness and areas for**  
28 **improvement.** *Canadian Medical Association Journal* 2010,  
29 **182**(10):1045-1052.  
30  
31  
32  
33 36. Sivera F, Andres M, Carmona L, Kydd ASR, Moi J, Seth R,  
34 Sriranganathan M, Van Durme C, Van Echteld I, Vinik O *et al*:  
35 **Multinational evidence-based recommendations for the diagnosis**  
36 **and management of gout: Integrating systematic literature review**  
37 **and expert opinion of a broad panel of rheumatologists in the 3e**  
38 **initiative.** *Annals of the rheumatic diseases* 2014, **73**(2):328-335.  
39  
40  
41  
42 37. Chinese Society of Endocrinology. **Chinese consensus on the**  
43 **management of hyperuricemia and gout.** *Chin J Endocrinol Metab.*  
44 2013: **29**(11): 913-920 (Original document in Chinese).  
45  
46  
47  
48 38. Association TR: **Taiwan guideline for the management of gout and**  
49 **hyperuricemia - updated 2016.** *Formosan Journal of Rheumatology*  
50 2016, **30**:1-32.  
51  
52  
53  
54 39. Kiltz U, Smolen J, Bardin T, Cohen Solal A, Dalbeth N, Doherty M,  
55  
56  
57  
58  
59  
60

- 1  
2  
3  
4 Engel B, Flader C, Kay J, Matsuoka M *et al*: **Treat-to-target (T2T)**  
5 **recommendations for gout.** *Annals of the rheumatic diseases* 2016.  
6  
7  
8 40. Araujo F, Cordeiro I, Teixeira F, Rovisco J, Ramiro S, Mourao AF,  
9 Costa JA, Pimentao JB, Malcata A, Santos MJ *et al*: **Portuguese**  
10 **recommendations for the diagnosis and management of gout.** *Acta*  
11 *reumatologica portuguesa* 2014, **39**(2):158-171.  
12  
13  
14  
15 41. Chinese Rheumatology Association. **2016 Chinese guideline on the**  
16 **diagnosis and management of gout.** *Chin J Intern Med.* 2016: **55**(11):  
17 892-899 (Original document in Chinese).  
18  
19  
20  
21 42. Neogi T, Jansen TLTA, Dalbeth N, Fransen J, Schumacher HR,  
22 Berendsen D, Brown M, Choi H, Edwards NL, Janssens HJEM *et al*:  
23 **2015 Gout classification criteria: An American College of**  
24 **Rheumatology/European League Against Rheumatism**  
25 **collaborative initiative.** *Annals of the rheumatic diseases* 2015,  
26 **74**(10):1789-1798.  
27  
28  
29  
30  
31  
32  
33 43. Graf SW, Whittle SL, Wechalekar MD, Moi JHY, Barrett C, Hill CL,  
34 Littlejohn G, Lynch N, Major G, Taylor AL *et al*: **Australian and New**  
35 **Zealand recommendations for the diagnosis and management of**  
36 **gout: Integrating systematic literature review and expert opinion in**  
37 **the 3e Initiative.** *International journal of rheumatic diseases* 2015,  
38 **18**(3):341-351.  
39  
40  
41  
42  
43  
44 44. Federal Ministry of Health (Nigeria). **National nutritional guideline on**  
45 **non-communicable disease prevention, control and management.**  
46 Accessed at <http://www.health.gov.ng/doc/NutritionalGuideline.pdf> on  
47 28 July 2017.  
48  
49  
50  
51  
52 45. Manara M, Bortoluzzi A, Favero M, Prevete I, Scire CA, Bianchi G,  
53 Borghi C, Cimmino MA, D'Avola GM, Desideri G *et al*: **Italian Society**  
54 **of Rheumatology recommendations for the management of gout.**  
55 *Reumatismo* 2013, **65**(1):4-21.  
56  
57  
58  
59  
60 46. Spanish Society of Rheumatology (SER). **Clinical practice guidelines**



- 1  
2  
3  
4 **for management of gout.** Accessed at  
5 [https://www.ser.es/wp-content/uploads/2015/09/GuipClinGot\\_1140226](https://www.ser.es/wp-content/uploads/2015/09/GuipClinGot_1140226)  
6 [\\_EN.pdf](#) on 28 July 2017.  
7  
8
- 9  
10 47. Hu D, Ding R: **The diagnosis and treatment advice of**  
11 **cardiovascular disease combined asymptomatic hyperuricemia**  
12 **(second edition).** *Chinese Journal of Cardiovascular Research* 2012,  
13 **10(4):241-249.**  
14  
15  
16  
17 48. Yamanaka H: **Japanese guideline for the management of**  
18 **hyperuricemia and gout: second edition.** *Nucleosides, nucleotides &*  
19 *nucleic acids* 2011, **30(12):1018-1029.**  
20  
21  
22  
23 49. **Ministry of Health Malaysia (MOH). Management of gout.** Accessed  
24 **at <http://www.moh.gov.my/penerbitan/CPG2017/3893.pdf> on 28**  
25 **July 2017.**  
26  
27  
28  
29 50. Li-Yu J, Salido E, Manahan S, Lichauco J, Lorenzo J, Torralba K, Raso  
30 A, Roberto L, Santos EP, Maceda L: **Philippine clinical practice**  
31 **guidelines for the management of gout.** *International journal of*  
32 *rheumatic diseases* 2008, **11:A362.**  
33  
34  
35  
36  
37 51. Meyers OL, Cassim B, Mody GM: **Hyperuricaemia and gout: clinical**  
38 **guideline 2003.** *South African medical journal = Suid-Afrikaanse*  
39 *tydskrif vir geneeskunde* 2003, **93(12 Pt 2):961-971.**  
40  
41  
42  
43 52. The University of Texas at Austin, School of Nursing, Family Nurse  
44 Practitioner Program. **Management of initial gout in adults.** Accessed  
45 **at**  
46 [http://www.alabmed.com/uploadfile/2014/0515/20140515070230703.p](http://www.alabmed.com/uploadfile/2014/0515/20140515070230703.pdf)  
47 [df](#) on 25 July 2017.  
48  
49  
50  
51  
52 53. Shekelle PG, Woolf SH, Eccles M, Grimshaw J: **Developing**  
53 **guidelines.** *BMJ (Clinical research ed)* 1999, **318(7183):593-596.**  
54  
55  
56 54. Multidisciplinary Expert Task Force on Hyperuricemia and Related  
57 Diseases: **Chinese Multidisciplinary Expert Consensus on the**  
58 **Diagnosis and Treatment of Hyperuricemia and Related Diseases.**  
59  
60

- 1  
2  
3  
4  
5  
6  
7  
8  
9  
10  
11  
12  
13  
14  
15  
16  
17  
18  
19  
20  
21  
22  
23  
24  
25  
26  
27  
28  
29  
30  
31  
32  
33  
34  
35  
36  
37  
38  
39  
40  
41  
42  
43  
44  
45  
46  
47  
48  
49  
50  
51  
52  
53  
54  
55  
56  
57  
58  
59  
60
- Chin Med J (Engl)* 2017, **130**(20):2473-2488.
55. Yu KH, Chen DY, Chen JH, Chen SY, Chen SM, Cheng TT, Hsieh SC, Hsieh TY, Hsu PF, Kuo CF, et al: **Management of gout and hyperuricemia: Multidisciplinary consensus in Taiwan.** *Int J Rheum Dis* 2018, **21**(4):772-787.
56. Nuki G: **An appraisal of the 2012 American College of Rheumatology Guidelines for the Management of Gout.** *Current opinion in rheumatology* 2014, **26**(2):152-161.
57. Wang D, Yu Y, Chen Y, Yang N, Zhang H, Wang C, Wang Q, Wang X, Zeng X, Estill J: **Assessing the Quality of Global Clinical Practice Guidelines on Gout Using AGREE II Instrument.** *J Clin Rheumatol* 2018.
58. Zhang W, Doherty M, Bardin T, Pascual E, Barskova V, Conaghan P, Gerster J, Jacobs J, Leeb B, Liote F *et al*: **EULAR evidence based recommendations for gout. Part II: Management. Report of a task force of the EULAR Standing Committee for International Clinical Studies Including Therapeutics (ESCSIT).** *Annals of the rheumatic diseases* 2006, **65**(10):1312-1324.
59. Holmer HK, Ogden LA, Burda BU, Norris SL: **Quality of clinical practice guidelines for glycemic control in type 2 diabetes mellitus.** *PloS one* 2013, **8**(4):e58625.
60. Wu CM, Wu AM, Young BK, Wu DJ, Margo CE, Greenberg PB: **An appraisal of clinical practice guidelines for diabetic retinopathy.** *American Journal of Medical Quality* 2016, **31**(4):370-375.
61. Fang Y, Yao L, Sun J, Zhang J, Li Y, Yang R, Yang K, Tian L: **Appraisal of clinical practice guidelines on the management of hypothyroidism in pregnancy using the Appraisal of Guidelines for Research and Evaluation II instrument.** *Endocrine* 2018:1-11.
62. Hazlewood GS, Akhavan P, Schieir O, Marshall D, Tomlinson G, Bykerk V, Bombardier C: **Adding a “GRADE” to the quality appraisal**

- 1  
2  
3  
4 **of rheumatoid arthritis guidelines identifies limitations beyond**  
5 **AGREE-II.** *Journal of clinical epidemiology* 2014, **67**(11):1274-1285.
- 6  
7  
8 63. Palmowski Y, Buttgereit T, Dejaco C, Bijlsma JW, Matteson EL,  
9 Voshaar M, Boers M, Buttgereit F: **“Official View” on Glucocorticoids**  
10 **in Rheumatoid Arthritis: A Systematic Review of International**  
11 **Guidelines and Consensus Statements.** *Arthritis care & research*  
12 2017, **69**(8):1134-1141.
- 13  
14  
15  
16  
17  
18 64. Tunnicliffe DJ, Singh-Grewal D, Kim S, Craig JC, Tong A: **Diagnosis,**  
19 **monitoring, and treatment of systemic lupus erythematosus: a**  
20 **systematic review of clinical practice guidelines.** *Arthritis care &*  
21 *research* 2015, **67**(10):1440-1452.
- 22  
23  
24  
25  
26 65. Alonso-Coello P, Irfan A, Solà I, Gich I, Delgado-Noguera M, Rigau D,  
27 Tort S, Bonfill X, Burgers J, Schunemann H: **The quality of clinical**  
28 **practice guidelines over the last two decades: a systematic review**  
29 **of guideline appraisal studies.** *Qual Saf Health Care* 2010,  
30 **19**(6):e58-e58.
- 31  
32  
33  
34  
35  
36 66. Devroey D, Vantomme K, Betz W, Vandevoorde J, Kartounian J: **A**  
37 **review of the treatment guidelines on the management of low**  
38 **levels of high-density lipoprotein cholesterol.** *Cardiology* 2004,  
39 **102**(2):61-66.
- 40  
41  
42  
43 67. Gavriilidis P, Roberts KJ, Askari A, Sutcliffe RP, Liu P-H, Hidalgo E,  
44 Compagnon P, Lim C, Azoulay D: **Evaluation of the current**  
45 **guidelines for resection of hepatocellular carcinoma using the**  
46 **Appraisal of Guidelines for Research and Evaluation II instrument.**  
47 *Journal of hepatology* 2017, **67**(5):991-998.
- 48  
49  
50  
51  
52  
53 68. Jutkowitz E, Dubreuil M, Lu N, Kuntz KM, Choi HK: **The**  
54 **cost-effectiveness of HLA-B\*5801 screening to guide initial**  
55 **urate-lowering therapy for gout in the United States.** *Semin Arthritis*  
56 *Rheum* 2017, **46**(5):594-600.
- 57  
58  
59  
60

- 1  
2  
3  
4 69. Plumpton CO, Alfirevic A, Pirmohamed M, Hughes DA: **Cost**  
5 **effectiveness analysis of HLA-B\*58:01 genotyping prior to**  
6 **initiation of allopurinol for gout.** *Rheumatology (Oxford)* 2017,  
7 **56(10):1729-1739.**  
8  
9  
10  
11 70. Li T, Vedula SS, Scherer R, Dickersin K: **What comparative**  
12 **effectiveness research is needed? A framework for using**  
13 **guidelines and systematic reviews to identify evidence gaps and**  
14 **research priorities.** *Annals of internal medicine* 2012, **156(5):367-377.**  
15  
16  
17  
18  
19 71. Brosseau L, Rahman P, Poitras S, Toupin-April K, Paterson G, Smith C,  
20 King J, Casimiro L, De Angelis G, Loew L: **A systematic critical**  
21 **appraisal of non-pharmacological management of rheumatoid**  
22 **arthritis with appraisal of guidelines for research and evaluation II.**  
23 *PloS one* 2014, **9(5):e95369.**  
24  
25  
26  
27  
28  
29 72. Watine J, Friedberg B, Nagy E, Onody R, Oosterhuis W, Bunting PS,  
30 Charet J-C, Horvath AR: **Conflict between guideline methodologic**  
31 **quality and recommendation validity: a potential problem for**  
32 **practitioners.** *Clinical chemistry* 2006, **52(1):65-72.**  
33  
34  
35  
36  
37  
38  
39  
40  
41  
42  
43  
44  
45  
46  
47  
48  
49  
50  
51  
52  
53  
54  
55  
56  
57  
58  
59  
60

## TABLES AND FIGURES

**Table 1. Characteristics of included guidelines and consensus statements**

3e: Evidence, Expertise, Exchange; ACP: American College of Physicians; ACR: American College of Rheumatology; AMM: Academy of Medicine of Malaysia; ASCR: American Society of Clinical Rheumatologists; CS: consensus statement; CVD: cardiovascular diseases; ER: external review; EULAR: European League Against Rheumatism; LOE: level of evidence; MOH: Ministry of Health Malaysia; MSR: Malaysian Society of Rheumatology; Multi: multidisciplinary development group; NG: not given; NIAMS: National Institute of Arthritis and Musculoskeletal and Skin Diseases; NIH: National Institutes of Health; Phy: physicians; Pt: patients; Rheu: rheumatologists; SLR: systematic literature review; SOR: strength of recommendation.

| Document                     | Issuing organization                | Year of publication | Country      | Funding body                  | Target population       | Target audience | Guideline development | Guideline review | Guideline update    | Evidence base | LOE | SOR |
|------------------------------|-------------------------------------|---------------------|--------------|-------------------------------|-------------------------|-----------------|-----------------------|------------------|---------------------|---------------|-----|-----|
| <b>Guidelines</b>            |                                     |                     |              |                               |                         |                 |                       |                  |                     |               |     |     |
| <b>SAMA_2003 [51]</b>        | South African Medical Association   | 2003                | South Africa | Pharmaceutical company        | Gout                    | Phy             | Multi                 | ER               | Intermittent        | NG            | -   | -   |
| <b>EULAR_2006 [18]</b>       | EULAR                               | 2006                | Europe       | EULAR                         | Gout                    | NG              | Rheu                  | NG               | NG                  | SLR           | +   | +   |
| <b>MOH_MSR_AMM_2008 [49]</b> | MOH, MSR, AMM                       | 2008                | Malaysia     | Pharmaceutical company        | Adults (>16y) with gout | Phy             | Multi                 | ER               | 2012 or sooner      | SLR           | +   | +   |
| <b>PRA_2008 [50]</b>         | Philippine Rheumatology Association | 2008                | Philippine   | NG                            | Gout                    | Phy             | NG                    | NG               | Three or more years | SLR           | +   | +   |
| <b>UTAustin_2009 [52]</b>    | University of Texas at Austin       | 2009                | US           | University of Texas at Austin | Adults with gout        | Phy             | NG                    | ER               | NG                  | SLR           | +   | +   |
| <b>EULAR_2011 [17]</b>       | EULAR                               | 2011                | Multination  | Pharmaceutical company, ASCR  | Gout                    | Phy             | Multi                 | NG               | NG                  | SLR           | +   | +   |

|                             |                                                      |      |               |                        |                                     |                     |       |    |                 |     |   |   |
|-----------------------------|------------------------------------------------------|------|---------------|------------------------|-------------------------------------|---------------------|-------|----|-----------------|-----|---|---|
| <b>JSGNAM_2011 [48]</b>     | Japanese Society of Gout and Nucleic Acid Metabolism | 2011 | Japan         | NG                     | Hyperuricemia or gout               | NG                  | NG    | ER | NG              | SLR | + | + |
| <b>ACR_2012 [14, 15]</b>    | ACR                                                  | 2012 | US            | ACR, NIAMS, NIH        | Gout                                | Phy                 | Multi | NG | Intermittent    | SLR | + | - |
| <b>SER_2013 [46]</b>        | Spanish Society of Rheumatology                      | 2013 | Spain         | Pharmaceutical company | Gout                                | Phy                 | Multi | ER | Four years      | SLR | + | + |
| <b>SIR_2013 [45]</b>        | Italian Society of Rheumatology                      | 2013 | Italy         | NG                     | Gout                                | Phy                 | Multi | NG | NG              | SLR | + | + |
| <b>FMOH_2014 [44]</b>       | Federal Ministry of Health (Nigeria)                 | 2014 | Nigeria       | NG                     | Gout                                | Phy, Pts in Nigeria | Multi | NG | NG              | NG  | - | - |
| <b>CRA_2016 [41]</b>        | Chinese Rheumatology Association                     | 2016 | China         | NG                     | Gout in China                       | Phy                 | Multi | NG | NG              | SLR | + | + |
| <b>EULAR_2016 [16]</b>      | EULAR                                                | 2016 | Europe        | NG                     | Gout                                | Phy, Pts            | Multi | ER | Intermittent    | SLR | + | + |
| <b>TRA_2016 [38]</b>        | Taiwan Rheumatology Association                      | 2016 | Taiwan, China | NG                     | Hyperuricemia or gout               | Phy, Pts            | Multi | NG | NG              | NG  | - | - |
| <b>ACP_2017 [19, 20]</b>    | ACP                                                  | 2017 | US            | ACP                    | Acute and recurrent gout            | Phy                 | NG    | ER | Five years      | SLR | + | + |
| <b>BSR_2017 [21]</b>        | The British Society for Rheumatology                 | 2017 | UK            | No specific funding.   | Gout in the UK                      | Phy                 | Multi | ER | Planned in 2020 | SLR | + | + |
| <b>Consensus statements</b> |                                                      |      |               |                        |                                     |                     |       |    |                 |     |   |   |
| <b>CCCP_2012 [47]</b>       | Chinese College of Cardiovascular Physicians         | 2012 | China         | NG                     | Asymptomatic hyperuricemia with CVD | NG                  | NG    | NG | NG              | CS  | - | - |
| <b>3e_2013 [36]</b>         | 3e Initiative                                        | 2013 | Multination   | Pharmaceutical company | Gout                                | NG                  | Rheu  | NG | NG              | SLR | + | + |
| <b>CSE_2013 [37]</b>        | Chinese Society of Endocrinology                     | 2013 | China         | NG                     | Hyperuricemia or gout               | NG                  | NG    | NG | NG              | CS  | - | - |
| <b>3e_PT_2014 [40]</b>      | Portuguese 3e Initiative                             | 2014 | Portugal      | NG                     | Gout in Portuguese                  | NG                  | Rheu  | NG | NG              | SLR | + | + |
| <b>3e_AU_NZ_2015 [43]</b>   | Australian and New Zealand 3e Initiative             | 2015 | Multination   | NG                     | Gout                                | NG                  | Rheu  | NG | NG              | SLR | + | + |

1  
2  
3  
4  
5  
6  
7  
8  
9  
10  
11  
12  
13  
14  
15  
16  
17  
18  
19  
20  
21  
22  
23  
24  
25  
26  
27  
28  
29  
30  
31  
32  
33  
34  
35  
36  
37  
38  
39  
40  
41  
42  
43  
44  
45  
46

|                            |                                                                                        |      |             |                        |               |     |       |    |              |     |   |   |
|----------------------------|----------------------------------------------------------------------------------------|------|-------------|------------------------|---------------|-----|-------|----|--------------|-----|---|---|
| <b>ACR_EULAR_2015 [42]</b> | ACR/EULAR                                                                              | 2015 | Multination | ACR, EULAR             | Gout          | NG  | NG    | ER | Intermittent | SLR | - | - |
| <b>T2T_2016 [39]</b>       | NG                                                                                     | 2016 | Multination | Pharmaceutical company | Gout          | NG  | Rheu  | ER | NG           | SLR | + | + |
| <b>CRA_multi_2017 [22]</b> | Chinese multi-disciplinary expert task force on hyperuricemia and its related diseases | 2017 | China       | NG                     | Hyperuricemia | Phy | Multi | NG | NG           | CS  | - | - |

1  
2  
3  
4  
5 **Figure 1. Flow diagram for literature search**

6 NGC, National Guideline Clearinghouse; GIN, Guidelines International Network; NICE, National Institute for Health and Care  
7 Excellence; NHS, National Health Service; SIGN, Scottish Intercollegiate Guidelines Network; GAIN, Guidelines and Audit  
8 Implementation Network; TRIP, Turning Research Into Practice Database; CBM, Chinese Biomedical Literature Database.  
9  
10  
11  
12  
13  
14  
15  
16  
17  
18  
19  
20  
21  
22  
23  
24  
25  
26  
27  
28  
29  
30  
31  
32  
33  
34  
35  
36  
37  
38  
39  
40  
41  
42  
43  
44  
45  
46

For peer review only



**Figure 2. Standardized domain scores for each guidance document**

3e: Evidence, Expertise, Exchange Initiative; 3e\_AU\_NZ: Australian and New Zealand 3e Initiative; 3e\_PT: Portuguese 3e Initiative; ACP: American College of Physicians; ACR: American College of Rheumatology; AMM: Academy of Medicine of Malaysia; ASCR: American Society of Clinical Rheumatologists; BSR: British Society for Rheumatology; CCCP: Chinese College of Cardiovascular Physicians; CRA: Chinese Rheumatology Association; CRA\_multi: Chinese multi-disciplinary expert task force on hyperuricemia and its related diseases; CSE: Chinese Society of Endocrinology; EULAR: European League Against Rheumatism; FMOH: Federal Ministry of Health (Nigeria); IQR: interquartile range; JSGNAM: Japanese Society of Gout and Nucleic Acid Metabolism; MOH: Ministry of Health Malaysia; MSR: Malaysian Society of Rheumatology; NIAMS: National Institute of Arthritis and Musculoskeletal and Skin Diseases; NIH: National Institutes of Health; PRA: Philippine Rheumatology Association; SAMA: South African Medical Association; SER: Spanish Society of Rheumatology; SIR: Italian Society of Rheumatology; T2T: Treat-to-target recommendations; TRA: Taiwan Rheumatology Association; UTAustin: University of Texas at Austin.

### Figure 3. Summary of key recommendations for the diagnosis and treatment of gout and hyperuricemia

3e: Evidence, Expertise, Exchange Initiative; 3e\_AU\_NZ: Australian and New Zealand 3e Initiative; 3e\_PT: Portuguese 3e Initiative; ACP: American College of Physicians; ACR: American College of Rheumatology; AMM: Academy of Medicine of Malaysia; ASCR: American Society of Clinical Rheumatologists; BSR: British Society for Rheumatology; CCCP: Chinese College of Cardiovascular Physicians; CRA: Chinese Rheumatology Association; CRA\_multi: Chinese multi-disciplinary expert task force on hyperuricemia and its related diseases; CSE: Chinese Society of Endocrinology; EULAR: European League Against Rheumatism; FMOH: Federal Ministry of Health (Nigeria); JSGNAM: Japanese Society of Gout and Nucleic Acid Metabolism; MOH: Ministry of Health Malaysia; MSR: Malaysian Society of Rheumatology; NIAMS: National Institute of Arthritis and Musculoskeletal and Skin Diseases; NIH: National Institutes of Health; PRA: Philippine Rheumatology Association; SAMA: South African Medical Association; SER: Spanish Society of Rheumatology; SIR: Italian Society of Rheumatology; SUA: serum uric acid; T2T: Treat-to-target recommendations; TRA: Taiwan Rheumatology Association; UTAustin: University of Texas at Austin.

### Figure 1 Flow diagram for literature search

NGC, National Guideline Clearinghouse; GIN, Guidelines International Network; NICE, National Institute for Health and Care Excellence; NHS, National Health Service; SIGN, Scottish Intercollegiate Guidelines Network; GAIN, Guidelines and Audit Implementation Network; TRIP, Turning Research Into Practice Database; CBM, Chinese Biomedical Literature Database.



From: Moher D, Liberati A, Tetzlaff J, Altman DG, The PRISMA Group (2009). Preferred Reporting Items for Systematic Reviews and Meta-Analyses: The PRISMA Statement. PLoS Med 6(7): e1000097. doi:10.1371/journal.pmed1000097

For more information, visit [www.prisma-statement.org](http://www.prisma-statement.org).

For peer review only - <http://bmjopen.bmj.com/site/about/guidelines.xhtml>



Figure 2. Standardized domain scores for each guidance document: AMM: Academy of Medicine of Malaysia; ASMA: South African Medical Association; ASP: American Society of Podiatry; ACP: American College of Physicians; ACR: American College of Rheumatology; AU: Australian and New Zealand 3e Initiative; AU\_NZ: Australian and New Zealand 3e Initiative; AU\_PT: Portuguese 3e Initiative; ACP: American College of Physicians; ACR: American College of Rheumatology; AMM: Academy of Medicine of Malaysia; ASCR: American Society of Clinical Rheumatologists; BSR: British Society for Rheumatology; CCCP: Chinese College of Cardiovascular Physicians; CRA: Chinese Rheumatology Association; CRA\_multi: Chinese multi-disciplinary expert task force on hyperuricemia and its related diseases; CSE: Chinese Society of Endocrinology; EULAR: European League Against Rheumatism; FMOH: Federal Ministry of Health (Nigeria); IQR: interquartile range; JSGNAM: Japanese Society of Gout and Nucleic Acid Metabolism; MOH: Ministry of Health Malaysia; MSR: Malaysian Society of Rheumatology; NIAMS: National Institute of Arthritis and Musculoskeletal and Skin Diseases; NIH: National Institutes of Health; PRA: Philippine Rheumatology Association; SAMA: South African Medical Association; SER: Spanish Society of Rheumatology; SIR: Italian Society of Rheumatology; T2T: Treat-to-target recommendations; TRA: Taiwan Rheumatology Association; UTAustin: University of Texas at Austin.

|                                                                                    |                                                     | Reference Contents                 | SAMA_2003 (51) | EULAR_2006 (18) | MOH_MSR_AMM_2008 (49) | PRA_2008 (59) | UTAustin_2009 (52) | EULAR_2011 (17) | JSGNAM_2011 (48) | ACR_2012 (14,15) | CCCP_2012 (47) | 3e_2013 (86) | CSE_2013 (37) | SER_2013 (46) | SIR_2013 (45) | 3e_PT_2014 (40) | FMOH_2014 (44) | 3e_AU_NZ_2015 (43) | ACR_EULAR_2015 (42) | CRA_2016 (41) | EULAR_2016 (16) | T2T_2016 (39) | TRA_2016 (38) | ACP_2017 (19,20) | BSR_2017 (21) | CRA_multi_2017 (22) |  |
|------------------------------------------------------------------------------------|-----------------------------------------------------|------------------------------------|----------------|-----------------|-----------------------|---------------|--------------------|-----------------|------------------|------------------|----------------|--------------|---------------|---------------|---------------|-----------------|----------------|--------------------|---------------------|---------------|-----------------|---------------|---------------|------------------|---------------|---------------------|--|
|                                                                                    |                                                     | <b>Diagnosis and Monitoring</b>    |                |                 |                       |               |                    |                 |                  |                  |                |              |               |               |               |                 |                |                    |                     |               |                 |               |               |                  |               |                     |  |
| Definition of gout                                                                 | Provided                                            |                                    |                |                 |                       |               |                    |                 |                  |                  |                |              |               |               |               |                 |                |                    |                     |               |                 |               |               |                  |               |                     |  |
| _Clinical manifestations                                                           | Yes                                                 |                                    |                |                 |                       |               |                    |                 |                  |                  |                |              |               |               |               |                 |                |                    |                     |               |                 |               |               |                  |               |                     |  |
| _Laboratory results                                                                | Yes                                                 |                                    |                |                 |                       |               |                    |                 |                  |                  |                |              |               |               |               |                 |                |                    |                     |               |                 |               |               |                  |               |                     |  |
| _Imaging results                                                                   | Yes                                                 |                                    |                |                 |                       |               |                    |                 |                  |                  |                |              |               |               |               |                 |                |                    |                     |               |                 |               |               |                  |               |                     |  |
| _MSU crystal detection as definitive diagnosis                                     | Yes                                                 |                                    |                |                 |                       |               |                    |                 |                  |                  |                |              |               |               |               |                 |                |                    |                     |               |                 |               |               |                  |               |                     |  |
| _Is urate deposits clearance monitored by imaging?                                 | No                                                  |                                    |                |                 |                       |               |                    |                 |                  |                  |                |              |               |               |               |                 |                |                    |                     |               |                 |               |               |                  |               |                     |  |
| _Is the timing to assess urate deposits with imaging techniques provided?          | No                                                  |                                    |                |                 |                       |               |                    |                 |                  |                  |                |              |               |               |               |                 |                |                    |                     |               |                 |               |               |                  |               |                     |  |
| _Is SUA cut-off provided for hyperuricemia?                                        | Yes                                                 |                                    |                |                 |                       |               |                    |                 |                  |                  |                |              |               |               |               |                 |                |                    |                     |               |                 |               |               |                  |               |                     |  |
| _All gender                                                                        | 420 µmol/L or 7.0 mg/dL                             |                                    |                |                 |                       |               |                    |                 |                  |                  |                |              |               |               |               |                 |                |                    |                     |               |                 |               |               |                  |               |                     |  |
| _Female                                                                            | 360 µmol/L or 6.0 mg/dL                             |                                    |                |                 |                       |               |                    |                 |                  |                  |                |              |               |               |               |                 |                |                    |                     |               |                 |               |               |                  |               |                     |  |
| _Male                                                                              | 420 µmol/L or 7.0 mg/dL                             |                                    |                |                 |                       |               |                    |                 |                  |                  |                |              |               |               |               |                 |                |                    |                     |               |                 |               |               |                  |               |                     |  |
| _Definition of asymptomatic hyperuricemia                                          | Provided                                            |                                    |                |                 |                       |               |                    |                 |                  |                  |                |              |               |               |               |                 |                |                    |                     |               |                 |               |               |                  |               |                     |  |
| _Gout flare                                                                        | Yes                                                 |                                    |                |                 |                       |               |                    |                 |                  |                  |                |              |               |               |               |                 |                |                    |                     |               |                 |               |               |                  |               |                     |  |
| _Tophi                                                                             | No                                                  |                                    |                |                 |                       |               |                    |                 |                  |                  |                |              |               |               |               |                 |                |                    |                     |               |                 |               |               |                  |               |                     |  |
| _Other medical conditions                                                          | Yes                                                 |                                    |                |                 |                       |               |                    |                 |                  |                  |                |              |               |               |               |                 |                |                    |                     |               |                 |               |               |                  |               |                     |  |
|                                                                                    |                                                     | <b>Treatment for Hyperuricemia</b> |                |                 |                       |               |                    |                 |                  |                  |                |              |               |               |               |                 |                |                    |                     |               |                 |               |               |                  |               |                     |  |
| _Is upper limit for the target SUA provided?                                       | Yes                                                 |                                    |                |                 |                       |               |                    |                 |                  |                  |                |              |               |               |               |                 |                |                    |                     |               |                 |               |               |                  |               |                     |  |
| _General target                                                                    | 360 µmol/L or 6.0 mg/dL                             |                                    |                |                 |                       |               |                    |                 |                  |                  |                |              |               |               |               |                 |                |                    |                     |               |                 |               |               |                  |               |                     |  |
| _Target for serve cases                                                            | 300 µmol/L or 5.0 mg/dL                             |                                    |                |                 |                       |               |                    |                 |                  |                  |                |              |               |               |               |                 |                |                    |                     |               |                 |               |               |                  |               |                     |  |
| _Lower limit for the target SUA                                                    | 180 µmol/L or 3.0 mg/dL                             |                                    |                |                 |                       |               |                    |                 |                  |                  |                |              |               |               |               |                 |                |                    |                     |               |                 |               |               |                  |               |                     |  |
| _Is drinking water explicitly recommended as a treatment?                          | Yes                                                 |                                    |                |                 |                       |               |                    |                 |                  |                  |                |              |               |               |               |                 |                |                    |                     |               |                 |               |               |                  |               |                     |  |
| _Is urine alkalinization recommended?                                              | Yes                                                 |                                    |                |                 |                       |               |                    |                 |                  |                  |                |              |               |               |               |                 |                |                    |                     |               |                 |               |               |                  |               |                     |  |
| _Indications for ULT                                                               | Yes                                                 |                                    |                |                 |                       |               |                    |                 |                  |                  |                |              |               |               |               |                 |                |                    |                     |               |                 |               |               |                  |               |                     |  |
| _Recurrent attacks                                                                 | Yes                                                 |                                    |                |                 |                       |               |                    |                 |                  |                  |                |              |               |               |               |                 |                |                    |                     |               |                 |               |               |                  |               |                     |  |
| _Tophi                                                                             | Yes                                                 |                                    |                |                 |                       |               |                    |                 |                  |                  |                |              |               |               |               |                 |                |                    |                     |               |                 |               |               |                  |               |                     |  |
| _Urate nephrolithiasis                                                             | Yes                                                 |                                    |                |                 |                       |               |                    |                 |                  |                  |                |              |               |               |               |                 |                |                    |                     |               |                 |               |               |                  |               |                     |  |
| _Arthropathy                                                                       | Yes                                                 |                                    |                |                 |                       |               |                    |                 |                  |                  |                |              |               |               |               |                 |                |                    |                     |               |                 |               |               |                  |               |                     |  |
| _Comorbidities                                                                     | Yes                                                 |                                    |                |                 |                       |               |                    |                 |                  |                  |                |              |               |               |               |                 |                |                    |                     |               |                 |               |               |                  |               |                     |  |
| _Others                                                                            | Yes                                                 |                                    |                |                 |                       |               |                    |                 |                  |                  |                |              |               |               |               |                 |                |                    |                     |               |                 |               |               |                  |               |                     |  |
| _Should ULT be initiated during or after an acute attack?                          | After an attack                                     |                                    |                |                 |                       |               |                    |                 |                  |                  |                |              |               |               |               |                 |                |                    |                     |               |                 |               |               |                  |               |                     |  |
| _What is the first line ULT drug option?                                           | Allopurinol                                         |                                    |                |                 |                       |               |                    |                 |                  |                  |                |              |               |               |               |                 |                |                    |                     |               |                 |               |               |                  |               |                     |  |
| _What is the second line ULT drug option?                                          | Febuxostat or probenecid                            |                                    |                |                 |                       |               |                    |                 |                  |                  |                |              |               |               |               |                 |                |                    |                     |               |                 |               |               |                  |               |                     |  |
| _What is the maximum daily dose of allopurinol recommended?                        | 600 mg                                              |                                    |                |                 |                       |               |                    |                 |                  |                  |                |              |               |               |               |                 |                |                    |                     |               |                 |               |               |                  |               |                     |  |
| _What is the cut off for renal function to initiate allopurinol dose adjustment?   | eGFR 130 ml/min/1.73m <sup>2</sup>                  |                                    |                |                 |                       |               |                    |                 |                  |                  |                |              |               |               |               |                 |                |                    |                     |               |                 |               |               |                  |               |                     |  |
| _What is the starting dose for allopurinol in patients with normal renal function? | 100 mg                                              |                                    |                |                 |                       |               |                    |                 |                  |                  |                |              |               |               |               |                 |                |                    |                     |               |                 |               |               |                  |               |                     |  |
| _Is HLA-B*5801 gene screening recommended for allopurinol use?                     | No                                                  |                                    |                |                 |                       |               |                    |                 |                  |                  |                |              |               |               |               |                 |                |                    |                     |               |                 |               |               |                  |               |                     |  |
| _Should prophylaxis be given with ULT?                                             | Yes                                                 |                                    |                |                 |                       |               |                    |                 |                  |                  |                |              |               |               |               |                 |                |                    |                     |               |                 |               |               |                  |               |                     |  |
| _Should prophylaxis be given before initiating ULT?                                | Yes                                                 |                                    |                |                 |                       |               |                    |                 |                  |                  |                |              |               |               |               |                 |                |                    |                     |               |                 |               |               |                  |               |                     |  |
| _What is the duration for prophylaxis?                                             | 3-6 months                                          |                                    |                |                 |                       |               |                    |                 |                  |                  |                |              |               |               |               |                 |                |                    |                     |               |                 |               |               |                  |               |                     |  |
| _Is pharmacological ULT recommended for asymptomatic hyperuricemia?                | No                                                  |                                    |                |                 |                       |               |                    |                 |                  |                  |                |              |               |               |               |                 |                |                    |                     |               |                 |               |               |                  |               |                     |  |
| _Are comorbidities considered?                                                     | Yes                                                 |                                    |                |                 |                       |               |                    |                 |                  |                  |                |              |               |               |               |                 |                |                    |                     |               |                 |               |               |                  |               |                     |  |
| _What is the SUA cut-off?                                                          | 8.0-9.0 mg/dL                                       |                                    |                |                 |                       |               |                    |                 |                  |                  |                |              |               |               |               |                 |                |                    |                     |               |                 |               |               |                  |               |                     |  |
|                                                                                    |                                                     | <b>Treatment for Acute Attack</b>  |                |                 |                       |               |                    |                 |                  |                  |                |              |               |               |               |                 |                |                    |                     |               |                 |               |               |                  |               |                     |  |
| _First line pharmacological treatment option                                       | Provided                                            |                                    |                |                 |                       |               |                    |                 |                  |                  |                |              |               |               |               |                 |                |                    |                     |               |                 |               |               |                  |               |                     |  |
| _NSAIDs                                                                            | Yes                                                 |                                    |                |                 |                       |               |                    |                 |                  |                  |                |              |               |               |               |                 |                |                    |                     |               |                 |               |               |                  |               |                     |  |
| _Colchicine                                                                        | Yes                                                 |                                    |                |                 |                       |               |                    |                 |                  |                  |                |              |               |               |               |                 |                |                    |                     |               |                 |               |               |                  |               |                     |  |
| _Steroids                                                                          | No                                                  |                                    |                |                 |                       |               |                    |                 |                  |                  |                |              |               |               |               |                 |                |                    |                     |               |                 |               |               |                  |               |                     |  |
| _What is the dosage of colchicine recommended?                                     | 1.2 mg loading dose followed by 0.6 mg 1 hour later |                                    |                |                 |                       |               |                    |                 |                  |                  |                |              |               |               |               |                 |                |                    |                     |               |                 |               |               |                  |               |                     |  |
| _Is intra-articular steroids recommended?                                          | Yes                                                 |                                    |                |                 |                       |               |                    |                 |                  |                  |                |              |               |               |               |                 |                |                    |                     |               |                 |               |               |                  |               |                     |  |
| _Indications for intra-articular steroids                                          | Provided                                            |                                    |                |                 |                       |               |                    |                 |                  |                  |                |              |               |               |               |                 |                |                    |                     |               |                 |               |               |                  |               |                     |  |
| _Involvement of 1-2 major joints                                                   | Yes                                                 |                                    |                |                 |                       |               |                    |                 |                  |                  |                |              |               |               |               |                 |                |                    |                     |               |                 |               |               |                  |               |                     |  |
| _Contraindicated to NSAIDs or colchicine                                           | Yes                                                 |                                    |                |                 |                       |               |                    |                 |                  |                  |                |              |               |               |               |                 |                |                    |                     |               |                 |               |               |                  |               |                     |  |
| _Which line of option is intra-articular steroids recommended to be?               | First                                               |                                    |                |                 |                       |               |                    |                 |                  |                  |                |              |               |               |               |                 |                |                    |                     |               |                 |               |               |                  |               |                     |  |
| _Is systemic steroids recommended?                                                 | Yes                                                 |                                    |                |                 |                       |               |                    |                 |                  |                  |                |              |               |               |               |                 |                |                    |                     |               |                 |               |               |                  |               |                     |  |
| _What are the indications for systemic steroids?                                   | Contraindicated to colchicine or NSAIDs.            |                                    |                |                 |                       |               |                    |                 |                  |                  |                |              |               |               |               |                 |                |                    |                     |               |                 |               |               |                  |               |                     |  |
| _Which line of option is systemic steroids recommended to be?                      | First                                               |                                    |                |                 |                       |               |                    |                 |                  |                  |                |              |               |               |               |                 |                |                    |                     |               |                 |               |               |                  |               |                     |  |
|                                                                                    |                                                     | <b>Treatment for Tophi</b>         |                |                 |                       |               |                    |                 |                  |                  |                |              |               |               |               |                 |                |                    |                     |               |                 |               |               |                  |               |                     |  |
| _Is surgery recommended?                                                           | Yes                                                 |                                    |                |                 |                       |               |                    |                 |                  |                  |                |              |               |               |               |                 |                |                    |                     |               |                 |               |               |                  |               |                     |  |
| _Indications for surgery                                                           | Provided                                            |                                    |                |                 |                       |               |                    |                 |                  |                  |                |              |               |               |               |                 |                |                    |                     |               |                 |               |               |                  |               |                     |  |
| _Nerve compression                                                                 | Yes                                                 |                                    |                |                 |                       |               |                    |                 |                  |                  |                |              |               |               |               |                 |                |                    |                     |               |                 |               |               |                  |               |                     |  |
| _Infection                                                                         | Yes                                                 |                                    |                |                 |                       |               |                    |                 |                  |                  |                |              |               |               |               |                 |                |                    |                     |               |                 |               |               |                  |               |                     |  |
| _Mechanical impingement                                                            | Yes                                                 |                                    |                |                 |                       |               |                    |                 |                  |                  |                |              |               |               |               |                 |                |                    |                     |               |                 |               |               |                  |               |                     |  |
| _Loss of mobility                                                                  | No                                                  |                                    |                |                 |                       |               |                    |                 |                  |                  |                |              |               |               |               |                 |                |                    |                     |               |                 |               |               |                  |               |                     |  |
| _Severe pain                                                                       | No                                                  |                                    |                |                 |                       |               |                    |                 |                  |                  |                |              |               |               |               |                 |                |                    |                     |               |                 |               |               |                  |               |                     |  |
| _Tophaceous ulcer                                                                  | No                                                  |                                    |                |                 |                       |               |                    |                 |                  |                  |                |              |               |               |               |                 |                |                    |                     |               |                 |               |               |                  |               |                     |  |
| _Others                                                                            | Yes                                                 |                                    |                |                 |                       |               |                    |                 |                  |                  |                |              |               |               |               |                 |                |                    |                     |               |                 |               |               |                  |               |                     |  |
| _What are the risks of surgery?                                                    | Wound healing                                       |                                    |                |                 |                       |               |                    |                 |                  |                  |                |              |               |               |               |                 |                |                    |                     |               |                 |               |               |                  |               |                     |  |
| _Is long-term serum urate lowering treatment recommended?                          | Yes                                                 |                                    |                |                 |                       |               |                    |                 |                  |                  |                |              |               |               |               |                 |                |                    |                     |               |                 |               |               |                  |               |                     |  |
| _Is any pharmacological treatment explicitly recommended?                          | Pegloticase                                         |                                    |                |                 |                       |               |                    |                 |                  |                  |                |              |               |               |               |                 |                |                    |                     |               |                 |               |               |                  |               |                     |  |

■ Consistent with the reference content  
■ Inconsistent with the reference content  
■ Partially consistent with the reference conte  
■ Not given  
■ Not applicable

Figure 3. Summary of key recommendations for the diagnosis and treatment of gout and hyperuricemia  
 3e: Evidence, Expertise, Exchange Initiative; 3e\_AU\_NZ: Australian and New Zealand 3e Initiative; 3e\_PT: Portuguese 3e Initiative; ACP: American College of Physicians; ACR: American College of Rheumatology; AMM: Academy of Medicine of Malaysia; ASCR: American Society of Clinical Rheumatologists; BSR: British Society for Rheumatology; CCCP: Chinese College of Cardiovascular Physicians; CRA: Chinese Rheumatology Association; CRA\_multi: Chinese multi-disciplinary expert task force on hyperuricemia and its related diseases; CSE: Chinese Society of Endocrinology; EULAR: European League Against Rheumatism; FMOH: Federal Ministry of Health (Nigeria); JSGNAM: Japanese Society of Gout and Nucleic Acid Metabolism; MOH: Ministry of Health Malaysia; MSR: Malaysian Society of Rheumatology; NIAMS: National Institute of Arthritis and Musculoskeletal and Skin Diseases; NIH: National Institutes of Health; PRA: Philippine Rheumatology Association; SAMA: South African Medical Association; SER: Spanish Society of Rheumatology; SIR: Italian Society of Rheumatology; SUA: serum uric acid; T2T: Treat-to-target recommendations; TRA: Taiwan Rheumatology Association; UTAustin: University of Texas at Austin.

## Supplementary Materials

Contents

Supplementary Table 1. Search strategy in PubMed

Supplementary Table 2. Search strategy in EMBASE using the OVID interface

Supplementary Table 3. Searches in guideline databases

Supplementary Table 4. Excluded studies and reasons for exclusion

Supplementary Table 5. Domain score for each included guidance document

Supplementary Table 6. Mean scores across reviewers for the individual AGREE II domain items

Supplementary Table 7. Scores for each individual AGREE II domain items by each reviewer

Supplementary Table 8. Summary of recommendations for the diagnosis of gout and hyperuricemia by included guidance documents

Supplementary Table 9. Summary of recommendations for the treatment of hyperuricemia by included guidance documents

Supplementary Table 10. Summary of recommendations for the treatment of acute gout by included guidance documents

Supplementary Table 11. Summary of recommendations for the treatment of tophi by included guidance documents

Supplementary Figure 1. Standardized domain scores by the year of publication

Supplementary File 1. Instructions for Guideline Appraisal Using the AGREE II Instrument

**Supplementary Table 1. Search strategy in PubMed**

|   |                                                                                           |
|---|-------------------------------------------------------------------------------------------|
| 1 | urate* OR uric acid OR gout OR hyperuricemia OR hyperuricaemia                            |
| 2 | guideline OR guideline* OR consensus OR policy OR polic* OR statement* OR recommendation* |
| 3 | 1 AND 2                                                                                   |

For peer review only

**Supplementary Table 2. Search strategy in EMBASE using the OVID interface**

|    |                                        |
|----|----------------------------------------|
| 1  | exp hyperuricemia/                     |
| 2  | exp gout/                              |
| 3  | exp uric acid/                         |
| 4  | exp urate/                             |
| 5  | gout.m_titl.                           |
| 6  | uric acid.m_titl.                      |
| 7  | urate\$.m_titl.                        |
| 8  | hyperuric?emia.m_titl.                 |
| 9  | 1 or 2 or 3 or 4 or 5 or 6 or 7 or 8   |
| 10 | exp practice guideline/                |
| 11 | guideline\$.m_titl.                    |
| 12 | consensus.m_titl.                      |
| 13 | position statement\$.m_titl.           |
| 14 | exp health care policy/ or exp policy/ |
| 15 | recommendation\$.m_titl.               |
| 16 | 10 or 11 or 12 or 13 or 14 or 15       |
| 17 | 9 and 16                               |



**Supplementary Table 3. Searches in guideline databases**

| Databases                                         | Date of search | Search strategy                                                                                                        | Results found | Full text screened | Included documents | URL                                                                                        |
|---------------------------------------------------|----------------|------------------------------------------------------------------------------------------------------------------------|---------------|--------------------|--------------------|--------------------------------------------------------------------------------------------|
| National Guideline Clearinghouse                  | 2017/07/24     | hyperuricaemia OR hyperuricemia OR gout                                                                                | 27            | 6                  | 4                  | <a href="http://www.guideline.gov">www.guideline.gov</a>                                   |
| Guidelines International Network                  | 2017/07/24     | hyperuricaemia OR hyperuricemia OR gout, Search mode: Guidelines                                                       | 11            | 5                  | 5                  | <a href="http://www.g-i-n.net">www.g-i-n.net</a>                                           |
| National Institute for Health and Care Excellence | 2017/07/24     | hyperuricaemia OR hyperuricemia OR gout                                                                                | 25            | 2                  | 0                  | <a href="http://www.nice.org.uk">www.nice.org.uk</a>                                       |
| National Health Service                           | 2017/07/24     | hyperuricaemia OR hyperuricemia OR gout, filter type: guidance and policy                                              | 498           | 5                  | 3                  | <a href="http://www.evidence.nhs.uk">www.evidence.nhs.uk</a>                               |
| Scottish Intercollegiate Guidelines Network       | 2017/07/24     | NA                                                                                                                     | 53            | 0                  | 0                  | <a href="http://www.sign.ac.uk/our-guidelines.html">www.sign.ac.uk/our-guidelines.html</a> |
| Guidelines and Audit Implementation Network       | 2017/07/24     | “hyperuricaemia” OR “hyperuricemia” OR “gout”                                                                          | 0             | 0                  | 0                  | <a href="http://rqia.org.uk/search-result">rqia.org.uk/search-result</a>                   |
| Turning Research Into Practice Database           | 2017/07/24     | hyperuricaemia OR hyperuricemia OR gout, filter: all secondary evidence                                                | 155           | 9                  | 3                  | <a href="http://www.tripdatabase.com">www.tripdatabase.com</a>                             |
| Epistemonikos database                            | 2017/07/24     | hyperuricaemia OR hyperuricemia OR gout, filter: Broad syntheses OR Structured summaries                               | 38            | 2                  | 1                  | <a href="http://www.epistemonikos.org">www.epistemonikos.org</a>                           |
| Chinese Biomedical Literature Database            | 2017/07/22     | [Original search term in Chinese] (hyperuricaemia OR gout) AND (guideline OR consensus OR statement OR recommendation) | 423           | 7                  | 5                  | <a href="http://202.115.54.56/index.jsp">202.115.54.56/index.jsp</a>                       |
| Wanfang Data                                      | 2017/07/22     | [Original search term in Chinese] (hyperuricaemia OR gout) AND (guideline OR consensus OR statement OR recommendation) | 1331          | 19                 | 4                  | <a href="http://www.wanfangdata.com.cn/">www.wanfangdata.com.cn/</a>                       |

Abbreviations: NA: Not applicable.

**Supplementary Table 4. Excluded studies and reasons for exclusion**

| <b>First author</b>    | <b>Year</b> | <b>Reason for exclusion</b>                                                              |
|------------------------|-------------|------------------------------------------------------------------------------------------|
| Wuthrich [68]          | 2016        | Review                                                                                   |
| Ceriotti [69]          | 2016        | Primary study                                                                            |
| Liote [70]             | 2016        | Editorial                                                                                |
| de Lautour [71]        | 2016        | Primary study                                                                            |
| de Lautour [72]        | 2014        | Conference abstract                                                                      |
| Dalbeth [73]           | 2015        | Review                                                                                   |
| Terslev [74]           | 2015        | Primary study                                                                            |
| Turk [75]              | 2016        | Not providing specific recommendations for hyperuricemia or gout                         |
| Stewart Coats [76]     | 2016        | Editorial                                                                                |
| Sullivan [77]          | 2015        | Review                                                                                   |
| Gutierrez [78]         | 2015        | Primary study                                                                            |
| Grainger [79]          | 2015        | Primary study                                                                            |
| Robinson [80]          | 2015        | Review                                                                                   |
| Chaudhary [81]         | 2013        | Review                                                                                   |
| Bakris [82]            | 2014        | Multimedia section                                                                       |
| Terkeltaub [83]        | 2013        | Review                                                                                   |
| Lyseng-Williamson [84] | 2013        | Review                                                                                   |
| Deodhar [85]           | 2013        | Review                                                                                   |
| Simao [86]             | 2012        | Review                                                                                   |
| Stamp [87]             | 2011        | Review                                                                                   |
| Jansen [88]            | 2010        | Not produced by related professional associations, institutes, societies, or communities |
| Grainger [89]          | 2009        | Review                                                                                   |
| Grainger [90]          | 2008        | Review                                                                                   |
| Dalbeth [91]           | 2007        | Review                                                                                   |
| Jordan [92]            | 2007        | Replaced by updated versions from the same organization                                  |
| Becker [93]            | 2007        | Not providing specific recommendations for hyperuricemia or gout                         |

|                                           |      |                                                                  |
|-------------------------------------------|------|------------------------------------------------------------------|
| Zhang [55]                                | 2006 | Replaced by updated versions from the same organization          |
| Caramia [94]                              | 2004 | Review                                                           |
| Terkeltaub [95]                           | 2003 | Case report                                                      |
| Cleland [96]                              | 1995 | Review                                                           |
| Hande [97]                                | 1984 | Case series                                                      |
| Committee on the Review of Medicines [98] | 1978 | Not providing specific recommendations for hyperuricemia or gout |
| Mourgues [99]                             | 2016 | Conference abstract                                              |
| Bakris [100]                              | 1970 | Not providing specific recommendations for hyperuricemia or gout |
| Pai [101]                                 | 2015 | Review                                                           |
| Vargas-Santos [102]                       | 2016 | Review                                                           |
| Filiopoulos [103]                         | 2016 | Comment letter                                                   |
| Chinchilla [104]                          | 2016 | Review                                                           |
| Rimler [105]                              | 2016 | Review                                                           |
| Saito [106]                               | 2016 | Not providing specific recommendations for hyperuricemia or gout |
| Mody [107]                                | 2015 | Review                                                           |
| Richette [108]                            | 2014 | Conference abstract                                              |
| Richette [109]                            | 2014 | Conference abstract                                              |
| Gutierrez [110]                           | 2014 | Conference abstract                                              |
| Furst [111]                               | 2013 | Not providing specific recommendations for hyperuricemia or gout |
| Hershfield [112]                          | 2013 | Not providing specific recommendations for hyperuricemia or gout |
| Andres [113]                              | 2012 | Conference abstract                                              |
| Stevenson [114]                           | 2011 | Technology appraisal                                             |
| Diaz-Borjon [115]                         | 2009 | Review                                                           |
| Furst [116]                               | 2010 | Not providing specific recommendations for hyperuricemia or gout |
| Taylor [117]                              | 2009 | Primary study                                                    |
| Taylor [118]                              | 2008 | Primary study                                                    |
| Bussieres [119]                           | 2008 | Not providing specific recommendations for hyperuricemia or gout |
| Brooks [120]                              | 2007 | Review                                                           |

|    |                                                             |      |                                                                  |
|----|-------------------------------------------------------------|------|------------------------------------------------------------------|
| 1  | Bestermann [121]                                            | 2005 | Not providing specific recommendations for hyperuricemia or gout |
| 2  | Schumacher Jr [122]                                         | 2004 | Review                                                           |
| 3  | Bartlett [123]                                              | 2002 | Not providing specific recommendations for hyperuricemia or gout |
| 4  | Furst [124]                                                 | 2013 | Not providing specific recommendations for hyperuricemia or gout |
| 5  | Newberry [125]                                              | 2017 | Review                                                           |
| 6  | Shekelle [126]                                              | 2017 | Review                                                           |
| 7  | Sandberg [127]                                              | 2015 | Not providing specific recommendations for hyperuricemia or gout |
| 8  | Kallinich [128]                                             | 2007 | Not providing specific recommendations for hyperuricemia or gout |
| 9  | Preminger [129]                                             | 2007 | Not providing specific recommendations for hyperuricemia or gout |
| 10 | TA164 [130]                                                 | 2008 | Technology appraisal                                             |
| 11 | Phoon [131]                                                 | 2012 | Not providing specific recommendations for hyperuricemia or gout |
| 12 | Li [132]                                                    | 2011 | Review                                                           |
| 13 | Zhang [133]                                                 | 2013 | Review                                                           |
| 14 | Deng [134]                                                  | 2016 | Primary study                                                    |
| 15 | Chinese Rheumatology Association [135]                      | 2004 | Replaced by updated versions from the same organization          |
| 16 | Chinese College of Cardiovascular Physicians [136]          | 2010 | Replaced by updated versions from the same organization          |
| 17 | Chinese Rheumatology Association [137]                      | 2011 | Replaced by updated versions from the same organization          |
| 18 | National Department of Health, Pretoria, South Africa [138] | 2006 | Not providing specific recommendations for hyperuricemia or gout |
| 19 | European Medicines Agency [139]                             | 2012 | Not providing specific recommendations for hyperuricemia or gout |
| 20 | Agency for Healthcare Research and Quality [140]            | 2017 | Review                                                           |
| 21 | Agency for Healthcare Research and Quality [141]            | 2017 | Review                                                           |
| 22 | National Institute for Health and Care Excellence [142]     | 2013 | Technology appraisal                                             |
| 23 | Agency for Healthcare Research and Quality [143]            | 2016 | Review                                                           |
| 24 | National Health System, United Kingdom [144]                | 2013 | Not providing specific recommendations for hyperuricemia or gout |
| 25 | Canadian Expert Drug Advisory Committee [145]               | 2011 | Not providing specific recommendations for hyperuricemia or gout |
| 26 | CME Academic Detailing Service [146]                        | 2013 | Presented as a 'handout', not a clinical practice guideline.     |
| 27 | Henderson [147]                                             | 2015 | Not released by a professional association                       |

**Supplementary Table 5. Domain score for each included guidance document**

| Document              | Domain 1, % | Domain 2, % | Domain 3, % | Domain 4, % | Domain 5, % | Domain 6, % |
|-----------------------|-------------|-------------|-------------|-------------|-------------|-------------|
| 3e_2013 [36]          | 95.8        | 34.7        | 65.6        | 77.8        | 42.7        | 72.9        |
| 3e_AU_NZ_2015 [43]    | 84.7        | 34.7        | 71.4        | 73.6        | 27.1        | 0.0         |
| 3e_PT_2014 [40]       | 95.8        | 22.2        | 42.7        | 70.8        | 27.1        | 0.0         |
| ACP_2017 [19, 20]     | 93.1        | 70.8        | 80.2        | 86.1        | 27.1        | 70.8        |
| ACR_2012 [14, 15]     | 86.1        | 81.9        | 73.4        | 84.7        | 1.0         | 45.8        |
| ACR_EULAR_2015 [42]   | 86.1        | 50.0        | 71.4        | 98.6        | 27.1        | 50.0        |
| BSR_2017 [21]         | 100.0       | 80.6        | 78.1        | 77.8        | 66.7        | 83.3        |
| CCCP_2012 [47]        | 76.4        | 9.7         | 8.3         | 62.5        | 0.0         | 0.0         |
| CRA_2016 [41]         | 84.7        | 48.6        | 50.5        | 70.8        | 2.1         | 33.3        |
| CRA_multi_2017 [22]   | 79.2        | 54.2        | 13.0        | 63.9        | 2.1         | 0.0         |
| CSE_2013 [37]         | 66.7        | 38.9        | 15.6        | 81.9        | 9.4         | 0.0         |
| EULAR_2006 [18]       | 86.1        | 23.6        | 65.1        | 90.3        | 24.0        | 16.7        |
| EULAR_2011 [17]       | 86.1        | 48.6        | 61.5        | 90.3        | 13.5        | 52.1        |
| EULAR_2016 [16]       | 83.3        | 79.2        | 67.7        | 94.4        | 26.0        | 29.2        |
| FMOH_2014 [44]        | 70.8        | 50.0        | 3.1         | 48.6        | 6.3         | 0.0         |
| JSGNAM_2011 [48]      | 81.9        | 38.9        | 37.0        | 87.5        | 0.0         | 0.0         |
| MOH_MSR_AMM_2008 [49] | 98.6        | 61.1        | 46.4        | 94.4        | 11.5        | 31.3        |
| PRA_2008 [50]         | 79.2        | 70.8        | 63.5        | 76.4        | 10.4        | 12.5        |
| SAMA_2003 [51]        | 75.0        | 37.5        | 28.1        | 80.6        | 5.2         | 50.0        |
| SER_2013 [46]         | 95.8        | 72.2        | 56.8        | 70.8        | 22.9        | 54.2        |
| SIR_2013 [45]         | 97.2        | 55.6        | 56.8        | 77.8        | 20.8        | 0.0         |
| T2T_2016 [39]         | 95.8        | 47.2        | 61.5        | 81.9        | 4.2         | 50.0        |
| TRA_2016 [38]         | 73.6        | 40.3        | 14.1        | 86.1        | 7.3         | 0.0         |
| UTAustin_2009 [52]    | 76.4        | 27.8        | 42.2        | 68.1        | 4.2         | 27.1        |
| <b>Median</b>         | 85.4        | 48.6        | 56.8        | 79.2        | 10.9        | 28.1        |
| <b>Minimum</b>        | 66.7        | 9.7         | 3.1         | 48.6        | 0.0         | 0.0         |
| <b>Maximum</b>        | 100.0       | 81.9        | 80.2        | 98.6        | 66.7        | 83.3        |

Supplementary Table 6. Mean scores across reviewers for the individual AGREE II domain items

| Document              | Domain 1 |     |     | Domain 2 |     |     | Domain 3 |     |     |     |     |     |     | Domain 4 |     |     | Domain 5 |     |     |     | Domain 6 |     |     |
|-----------------------|----------|-----|-----|----------|-----|-----|----------|-----|-----|-----|-----|-----|-----|----------|-----|-----|----------|-----|-----|-----|----------|-----|-----|
|                       | 1        | 2   | 3   | 4        | 5   | 6   | 7        | 8   | 9   | 10  | 11  | 12  | 13  | 14       | 15  | 16  | 17       | 18  | 19  | 20  | 21       | 22  | 23  |
| 3e_2013 [36]          | 6.8      | 6.5 | 7.0 | 7.0      | 1.3 | 1.0 | 6.3      | 3.8 | 6.3 | 5.8 | 5.8 | 6.8 | 4.0 | 1.0      | 6.0 | 7.0 | 4.0      | 6.8 | 1.0 | 5.3 | 1.3      | 7.0 | 3.8 |
| 3e_AU_NZ_2015 [43]    | 6.0      | 5.5 | 6.8 | 5.8      | 1.0 | 2.5 | 6.5      | 6.8 | 7.0 | 6.5 | 6.5 | 6.8 | 1.3 | 1.0      | 5.8 | 6.0 | 4.5      | 5.8 | 1.0 | 2.8 | 1.0      | 1.0 | 1.0 |
| 3e_PT_2014 [40]       | 6.5      | 7.0 | 6.8 | 4.8      | 1.3 | 1.0 | 2.8      | 2.3 | 5.5 | 3.5 | 5.5 | 6.8 | 1.3 | 1.0      | 5.5 | 6.3 | 4.0      | 4.5 | 1.3 | 2.8 | 2.0      | 1.0 | 1.0 |
| ACP_2017 [19, 20]     | 6.0      | 6.8 | 7.0 | 6.3      | 5.3 | 4.3 | 6.8      | 6.8 | 6.5 | 5.0 | 6.5 | 5.3 | 4.8 | 5.0      | 5.3 | 6.8 | 6.5      | 2.5 | 1.8 | 5.3 | 1.0      | 4.0 | 6.5 |
| ACR_2012 [14, 15]     | 6.5      | 5.5 | 6.5 | 7.0      | 5.3 | 5.5 | 7.0      | 7.0 | 6.8 | 6.0 | 5.8 | 6.0 | 1.5 | 3.3      | 5.8 | 7.0 | 5.5      | 1.0 | 1.0 | 1.0 | 1.3      | 3.3 | 4.3 |
| ACR_EULAR_2015 [42]   | 6.5      | 5.0 | 7.0 | 5.3      | 4.8 | 2.0 | 7.0      | 6.8 | 5.3 | 6.0 | 7.0 | 5.5 | 1.8 | 3.0      | 6.8 | 7.0 | 7.0      | 3.8 | 4.0 | 1.8 | 1.0      | 3.8 | 4.3 |
| BSR_2017 [21]         | 7.0      | 7.0 | 7.0 | 5.5      | 5.3 | 6.8 | 7.0      | 6.0 | 6.5 | 6.8 | 6.3 | 6.0 | 5.0 | 2.0      | 6.8 | 6.8 | 3.5      | 4.8 | 4.8 | 6.5 | 4.0      | 7.0 | 5.0 |
| CCCP_2012 [47]        | 6.8      | 3.0 | 7.0 | 2.0      | 1.0 | 1.8 | 1.0      | 1.0 | 1.0 | 1.0 | 3.8 | 2.0 | 1.3 | 1.0      | 4.5 | 5.8 | 4.0      | 1.0 | 1.0 | 1.0 | 1.0      | 1.0 | 1.0 |
| CRA_2016 [41]         | 6.3      | 5.0 | 7.0 | 5.5      | 1.0 | 5.3 | 5.0      | 3.3 | 6.3 | 3.5 | 6.0 | 5.5 | 1.8 | 1.0      | 5.3 | 6.5 | 4.0      | 1.3 | 1.0 | 1.3 | 1.0      | 1.0 | 5.0 |
| CRA_multi_2017 [22]   | 7.0      | 3.5 | 6.8 | 4.8      | 1.3 | 6.8 | 1.0      | 1.0 | 1.0 | 1.3 | 5.0 | 2.8 | 1.3 | 1.0      | 5.0 | 6.5 | 3.0      | 1.0 | 1.3 | 1.0 | 1.3      | 1.0 | 1.0 |
| CSE_2013 [37]         | 7.0      | 1.8 | 6.3 | 3.0      | 1.0 | 6.0 | 1.0      | 1.0 | 2.0 | 1.0 | 5.0 | 3.5 | 1.0 | 1.0      | 5.5 | 5.5 | 6.8      | 3.0 | 1.0 | 1.0 | 1.3      | 1.0 | 1.0 |
| EULAR_2006 [18]       | 6.0      | 5.5 | 7.0 | 5.0      | 1.0 | 1.3 | 7.0      | 7.0 | 5.8 | 4.3 | 6.0 | 5.8 | 1.3 | 2.3      | 6.0 | 6.8 | 6.5      | 1.0 | 2.5 | 5.3 | 1.0      | 3.0 | 1.0 |
| EULAR_2011 [17]       | 6.5      | 5.0 | 7.0 | 5.0      | 1.0 | 5.8 | 4.0      | 4.5 | 6.8 | 6.0 | 7.0 | 7.0 | 1.3 | 1.0      | 5.8 | 6.8 | 6.8      | 1.3 | 1.3 | 3.8 | 1.0      | 3.8 | 4.5 |
| EULAR_2016 [16]       | 6.3      | 4.8 | 7.0 | 5.8      | 5.0 | 6.5 | 5.0      | 2.0 | 6.3 | 6.8 | 6.0 | 6.5 | 6.0 | 2.0      | 6.5 | 6.8 | 6.8      | 3.0 | 1.3 | 5.0 | 1.0      | 1.5 | 4.0 |
| FMOH_2014 [44]        | 6.5      | 2.8 | 6.5 | 5.3      | 1.0 | 5.8 | 1.0      | 1.0 | 1.0 | 1.0 | 2.0 | 1.5 | 1.0 | 1.0      | 3.0 | 4.5 | 4.3      | 1.0 | 1.3 | 2.3 | 1.0      | 1.0 | 1.0 |
| JSGNAM_2011 [48]      | 5.3      | 5.5 | 7.0 | 1.8      | 4.3 | 4.0 | 1.3      | 1.0 | 6.8 | 3.3 | 6.3 | 3.8 | 2.5 | 1.0      | 6.8 | 6.3 | 5.8      | 1.0 | 1.0 | 1.0 | 1.0      | 1.0 | 1.0 |
| MOH_MSR_AMM_2008 [49] | 6.8      | 7.0 | 7.0 | 5.5      | 1.5 | 7.0 | 4.3      | 1.0 | 5.8 | 1.5 | 5.8 | 4.8 | 2.5 | 4.8      | 6.5 | 6.8 | 6.8      | 1.8 | 3.0 | 1.0 | 1.0      | 4.0 | 1.8 |
| PRA_2008 [50]         | 6.5      | 5.5 | 5.3 | 3.8      | 5.0 | 7.0 | 5.0      | 4.3 | 7.0 | 4.8 | 6.5 | 4.8 | 1.3 | 5.0      | 5.3 | 6.5 | 5.0      | 1.8 | 1.3 | 2.5 | 1.0      | 1.0 | 2.5 |
| SAMA_2003 [51]        | 6.5      | 3.0 | 7.0 | 4.0      | 1.3 | 4.5 | 1.0      | 1.0 | 1.0 | 4.0 | 6.5 | 2.8 | 2.5 | 2.8      | 5.0 | 6.5 | 6.0      | 1.0 | 2.0 | 1.3 | 1.0      | 7.0 | 1.0 |
| SER_2013 [46]         | 7.0      | 6.3 | 7.0 | 6.8      | 5.0 | 4.3 | 3.3      | 1.0 | 7.0 | 4.0 | 6.8 | 4.8 | 2.0 | 6.5      | 5.8 | 6.8 | 4.3      | 3.5 | 2.3 | 2.8 | 1.0      | 6.5 | 2.0 |
| SIR_2013 [45]         | 6.8      | 6.8 | 7.0 | 6.3      | 1.0 | 5.8 | 4.0      | 6.8 | 6.3 | 4.3 | 6.3 | 5.5 | 1.3 | 1.0      | 6.3 | 6.8 | 4.0      | 2.5 | 1.0 | 4.5 | 1.0      | 1.0 | 1.0 |
| T2T_2016 [39]         | 6.3      | 7.0 | 7.0 | 5.3      | 5.0 | 1.3 | 7.0      | 6.5 | 6.5 | 6.5 | 3.3 | 4.0 | 1.8 | 2.0      | 5.0 | 6.3 | 6.5      | 2.0 | 1.0 | 1.0 | 1.0      | 3.5 | 4.5 |
| TRA_2016 [38]         | 5.8      | 3.5 | 7.0 | 5.0      | 1.5 | 3.8 | 1.0      | 1.3 | 1.0 | 1.3 | 5.5 | 2.5 | 1.3 | 1.0      | 5.5 | 6.5 | 6.5      | 1.0 | 1.5 | 2.3 | 1.0      | 1.0 | 1.0 |
| UTAustin_2009 [52]    | 7.0      | 2.8 | 7.0 | 3.0      | 1.0 | 4.0 | 4.3      | 2.0 | 7.0 | 2.5 | 4.3 | 5.3 | 2.0 | 1.0      | 4.8 | 5.3 | 5.3      | 1.3 | 1.5 | 1.3 | 1.0      | 4.0 | 1.3 |

Supplementary Table 7. Scores for each individual AGREE II domain items by each reviewer

|                            | Ite m1 | Ite m2 | Ite m3 | Ite m4 | Ite m5 | Ite m6 | Ite m7 | Ite m8 | Ite m9 | Item 10 | Item 11 | Item 12 | Item 13 | Item 14 | Item 15 | Item 16 | Item 17 | Item 18 | Item 19 | Item 20 | Item 21 | Item 22 | Item 23 |
|----------------------------|--------|--------|--------|--------|--------|--------|--------|--------|--------|---------|---------|---------|---------|---------|---------|---------|---------|---------|---------|---------|---------|---------|---------|
| <b>3e_2013 [36]</b>        |        |        |        |        |        |        |        |        |        |         |         |         |         |         |         |         |         |         |         |         |         |         |         |
| Rev1                       | 7      | 7      | 7      | 7      | 1      | 1      | 6      | 4      | 4      | 5       | 7       | 7       | 2       | 1       | 6       | 7       | 4       | 7       | 1       | 5       | 1       | 7       | 4       |
| Rev2                       | 6      | 7      | 7      | 7      | 1      | 1      | 6      | 2      | 7      | 5       | 6       | 7       | 4       | 1       | 6       | 7       | 4       | 7       | 1       | 6       | 1       | 7       | 4       |
| Rev3                       | 7      | 5      | 7      | 7      | 2      | 1      | 7      | 5      | 7      | 6       | 5       | 6       | 5       | 1       | 5       | 7       | 4       | 7       | 1       | 5       | 2       | 7       | 3       |
| Rev4                       | 7      | 7      | 7      | 7      | 1      | 1      | 6      | 4      | 7      | 7       | 5       | 7       | 5       | 1       | 7       | 7       | 4       | 6       | 1       | 5       | 1       | 7       | 4       |
| <b>3e_AU_NZ_2015 [43]</b>  |        |        |        |        |        |        |        |        |        |         |         |         |         |         |         |         |         |         |         |         |         |         |         |
| Rev1                       | 5      | 5      | 7      | 7      | 1      | 2      | 7      | 7      | 7      | 7       | 7       | 7       | 2       | 1       | 5       | 6       | 4       | 6       | 1       | 2       | 1       | 1       | 1       |
| Rev2                       | 7      | 5      | 7      | 7      | 1      | 1      | 5      | 7      | 7      | 6       | 6       | 7       | 1       | 1       | 6       | 7       | 4       | 6       | 1       | 4       | 1       | 1       | 1       |
| Rev3                       | 5      | 7      | 7      | 4      | 1      | 4      | 7      | 7      | 7      | 7       | 7       | 7       | 1       | 1       | 6       | 5       | 6       | 6       | 1       | 2       | 1       | 1       | 1       |
| Rev4                       | 7      | 5      | 6      | 5      | 1      | 3      | 7      | 6      | 7      | 6       | 6       | 6       | 1       | 1       | 6       | 6       | 4       | 5       | 1       | 3       | 1       | 1       | 1       |
| <b>3e_PT_2014 [40]</b>     |        |        |        |        |        |        |        |        |        |         |         |         |         |         |         |         |         |         |         |         |         |         |         |
| Rev1                       | 6      | 7      | 7      | 5      | 1      | 1      | 3      | 1      | 7      | 3       | 6       | 7       | 2       | 1       | 5       | 6       | 4       | 4       | 1       | 5       | 1       | 1       | 1       |
| Rev2                       | 6      | 7      | 7      | 5      | 1      | 1      | 3      | 1      | 7      | 3       | 6       | 7       | 1       | 1       | 6       | 7       | 4       | 6       | 1       | 3       | 1       | 1       | 1       |
| Rev3                       | 7      | 7      | 6      | 5      | 2      | 1      | 2      | 1      | 6      | 5       | 4       | 6       | 1       | 1       | 5       | 6       | 4       | 4       | 2       | 2       | 5       | 1       | 1       |
| Rev4                       | 7      | 7      | 7      | 4      | 1      | 1      | 3      | 6      | 2      | 3       | 6       | 7       | 1       | 1       | 6       | 6       | 4       | 4       | 1       | 1       | 1       | 1       | 1       |
| <b>ACP_2017 [19, 20]</b>   |        |        |        |        |        |        |        |        |        |         |         |         |         |         |         |         |         |         |         |         |         |         |         |
| Rev1                       | 6      | 7      | 7      | 6      | 5      | 4      | 7      | 7      | 7      | 5       | 7       | 5       | 5       | 5       | 5       | 7       | 7       | 2       | 2       | 4       | 1       | 4       | 7       |
| Rev2                       | 6      | 7      | 7      | 6      | 5      | 4      | 7      | 7      | 7      | 5       | 7       | 5       | 5       | 4       | 6       | 7       | 7       | 4       | 3       | 7       | 1       | 4       | 7       |
| Rev3                       | 6      | 7      | 7      | 6      | 6      | 3      | 6      | 6      | 6      | 6       | 6       | 5       | 4       | 5       | 5       | 6       | 6       | 2       | 1       | 5       | 1       | 4       | 6       |
| Rev4                       | 6      | 6      | 7      | 7      | 5      | 6      | 7      | 7      | 6      | 4       | 6       | 6       | 5       | 6       | 5       | 7       | 6       | 2       | 1       | 5       | 1       | 4       | 6       |
| <b>ACR_2012 [14, 15]</b>   |        |        |        |        |        |        |        |        |        |         |         |         |         |         |         |         |         |         |         |         |         |         |         |
| Rev1                       | 6      | 5      | 7      | 7      | 5      | 7      | 7      | 7      | 6      | 6       | 6       | 5       | 2       | 3       | 5       | 7       | 4       | 1       | 1       | 1       | 1       | 3       | 4       |
| Rev2                       | 6      | 7      | 7      | 7      | 7      | 4      | 7      | 7      | 7      | 6       | 6       | 5       | 2       | 3       | 6       | 7       | 7       | 1       | 1       | 1       | 1       | 4       | 4       |
| Rev3                       | 7      | 5      | 7      | 7      | 5      | 7      | 7      | 7      | 7      | 6       | 5       | 7       | 1       | 3       | 5       | 7       | 7       | 1       | 1       | 1       | 2       | 3       | 4       |
| Rev4                       | 7      | 5      | 5      | 7      | 4      | 4      | 7      | 7      | 7      | 6       | 6       | 7       | 1       | 4       | 7       | 7       | 4       | 1       | 1       | 1       | 1       | 3       | 5       |
| <b>ACR_EULAR_2015 [42]</b> |        |        |        |        |        |        |        |        |        |         |         |         |         |         |         |         |         |         |         |         |         |         |         |
| Rev1                       | 6      | 5      | 7      | 6      | 6      | 2      | 7      | 7      | 7      | 7       | 7       | 5       | 2       | 3       | 7       | 7       | 7       | 3       | 3       | 1       | 1       | 4       | 4       |

|                            |   |   |   |   |   |   |   |   |   |   |   |   |   |   |   |   |   |   |   |   |   |   |   |
|----------------------------|---|---|---|---|---|---|---|---|---|---|---|---|---|---|---|---|---|---|---|---|---|---|---|
| 1                          |   |   |   |   |   |   |   |   |   |   |   |   |   |   |   |   |   |   |   |   |   |   |   |
| 2                          |   |   |   |   |   |   |   |   |   |   |   |   |   |   |   |   |   |   |   |   |   |   |   |
| 3                          |   |   |   |   |   |   |   |   |   |   |   |   |   |   |   |   |   |   |   |   |   |   |   |
| 4                          |   |   |   |   |   |   |   |   |   |   |   |   |   |   |   |   |   |   |   |   |   |   |   |
| 5                          |   |   |   |   |   |   |   |   |   |   |   |   |   |   |   |   |   |   |   |   |   |   |   |
| 6                          |   |   |   |   |   |   |   |   |   |   |   |   |   |   |   |   |   |   |   |   |   |   |   |
| 7                          |   |   |   |   |   |   |   |   |   |   |   |   |   |   |   |   |   |   |   |   |   |   |   |
| 8                          |   |   |   |   |   |   |   |   |   |   |   |   |   |   |   |   |   |   |   |   |   |   |   |
| 9                          |   |   |   |   |   |   |   |   |   |   |   |   |   |   |   |   |   |   |   |   |   |   |   |
| 10                         |   |   |   |   |   |   |   |   |   |   |   |   |   |   |   |   |   |   |   |   |   |   |   |
| 11                         |   |   |   |   |   |   |   |   |   |   |   |   |   |   |   |   |   |   |   |   |   |   |   |
| 12                         |   |   |   |   |   |   |   |   |   |   |   |   |   |   |   |   |   |   |   |   |   |   |   |
| 13                         |   |   |   |   |   |   |   |   |   |   |   |   |   |   |   |   |   |   |   |   |   |   |   |
| 14                         |   |   |   |   |   |   |   |   |   |   |   |   |   |   |   |   |   |   |   |   |   |   |   |
| 15                         |   |   |   |   |   |   |   |   |   |   |   |   |   |   |   |   |   |   |   |   |   |   |   |
| 16                         |   |   |   |   |   |   |   |   |   |   |   |   |   |   |   |   |   |   |   |   |   |   |   |
| 17                         |   |   |   |   |   |   |   |   |   |   |   |   |   |   |   |   |   |   |   |   |   |   |   |
| 18                         |   |   |   |   |   |   |   |   |   |   |   |   |   |   |   |   |   |   |   |   |   |   |   |
| 19                         |   |   |   |   |   |   |   |   |   |   |   |   |   |   |   |   |   |   |   |   |   |   |   |
| 20                         |   |   |   |   |   |   |   |   |   |   |   |   |   |   |   |   |   |   |   |   |   |   |   |
| 21                         |   |   |   |   |   |   |   |   |   |   |   |   |   |   |   |   |   |   |   |   |   |   |   |
| 22                         |   |   |   |   |   |   |   |   |   |   |   |   |   |   |   |   |   |   |   |   |   |   |   |
| 23                         |   |   |   |   |   |   |   |   |   |   |   |   |   |   |   |   |   |   |   |   |   |   |   |
| 24                         |   |   |   |   |   |   |   |   |   |   |   |   |   |   |   |   |   |   |   |   |   |   |   |
| 25                         |   |   |   |   |   |   |   |   |   |   |   |   |   |   |   |   |   |   |   |   |   |   |   |
| 26                         |   |   |   |   |   |   |   |   |   |   |   |   |   |   |   |   |   |   |   |   |   |   |   |
| 27                         |   |   |   |   |   |   |   |   |   |   |   |   |   |   |   |   |   |   |   |   |   |   |   |
| 28                         |   |   |   |   |   |   |   |   |   |   |   |   |   |   |   |   |   |   |   |   |   |   |   |
| 29                         |   |   |   |   |   |   |   |   |   |   |   |   |   |   |   |   |   |   |   |   |   |   |   |
| 30                         |   |   |   |   |   |   |   |   |   |   |   |   |   |   |   |   |   |   |   |   |   |   |   |
| 31                         |   |   |   |   |   |   |   |   |   |   |   |   |   |   |   |   |   |   |   |   |   |   |   |
| 32                         |   |   |   |   |   |   |   |   |   |   |   |   |   |   |   |   |   |   |   |   |   |   |   |
| 33                         |   |   |   |   |   |   |   |   |   |   |   |   |   |   |   |   |   |   |   |   |   |   |   |
| 34                         |   |   |   |   |   |   |   |   |   |   |   |   |   |   |   |   |   |   |   |   |   |   |   |
| 35                         |   |   |   |   |   |   |   |   |   |   |   |   |   |   |   |   |   |   |   |   |   |   |   |
| 36                         |   |   |   |   |   |   |   |   |   |   |   |   |   |   |   |   |   |   |   |   |   |   |   |
| 37                         |   |   |   |   |   |   |   |   |   |   |   |   |   |   |   |   |   |   |   |   |   |   |   |
| 38                         |   |   |   |   |   |   |   |   |   |   |   |   |   |   |   |   |   |   |   |   |   |   |   |
| 39                         |   |   |   |   |   |   |   |   |   |   |   |   |   |   |   |   |   |   |   |   |   |   |   |
| 40                         |   |   |   |   |   |   |   |   |   |   |   |   |   |   |   |   |   |   |   |   |   |   |   |
| 41                         |   |   |   |   |   |   |   |   |   |   |   |   |   |   |   |   |   |   |   |   |   |   |   |
| 42                         |   |   |   |   |   |   |   |   |   |   |   |   |   |   |   |   |   |   |   |   |   |   |   |
| 43                         |   |   |   |   |   |   |   |   |   |   |   |   |   |   |   |   |   |   |   |   |   |   |   |
| 44                         |   |   |   |   |   |   |   |   |   |   |   |   |   |   |   |   |   |   |   |   |   |   |   |
| 45                         |   |   |   |   |   |   |   |   |   |   |   |   |   |   |   |   |   |   |   |   |   |   |   |
| 46                         |   |   |   |   |   |   |   |   |   |   |   |   |   |   |   |   |   |   |   |   |   |   |   |
| Rev2                       | 6 | 5 | 7 | 5 | 6 | 1 | 7 | 7 | 6 | 6 | 7 | 5 | 2 | 3 | 7 | 7 | 7 | 5 | 7 | 1 | 1 | 4 | 4 |
| Rev3                       | 7 | 5 | 7 | 5 | 6 | 2 | 7 | 7 | 7 | 6 | 7 | 5 | 2 | 3 | 7 | 7 | 7 | 3 | 3 | 1 | 1 | 3 | 4 |
| Rev4                       | 7 | 5 | 7 | 5 | 1 | 3 | 7 | 6 | 1 | 5 | 7 | 7 | 1 | 3 | 6 | 7 | 7 | 4 | 3 | 4 | 1 | 4 | 5 |
| <b>BSR_2017 [21]</b>       |   |   |   |   |   |   |   |   |   |   |   |   |   |   |   |   |   |   |   |   |   |   |   |
| Rev1                       | 7 | 7 | 7 | 6 | 5 | 7 | 7 | 6 | 6 | 7 | 6 | 6 | 5 | 2 | 7 | 7 | 4 | 5 | 4 | 7 | 2 | 7 | 5 |
| Rev2                       | 7 | 7 | 7 | 6 | 5 | 7 | 7 | 6 | 6 | 6 | 7 | 5 | 5 | 2 | 7 | 7 | 3 | 5 | 5 | 7 | 5 | 7 | 5 |
| Rev3                       | 7 | 7 | 7 | 4 | 5 | 6 | 7 | 7 | 7 | 7 | 5 | 6 | 5 | 1 | 6 | 6 | 3 | 4 | 5 | 6 | 2 | 7 | 5 |
| Rev4                       | 7 | 7 | 7 | 6 | 6 | 7 | 7 | 5 | 7 | 7 | 7 | 7 | 5 | 3 | 7 | 7 | 4 | 5 | 5 | 6 | 2 | 7 | 5 |
| <b>CCCP_2012 [47]</b>      |   |   |   |   |   |   |   |   |   |   |   |   |   |   |   |   |   |   |   |   |   |   |   |
| Rev1                       | 6 | 3 | 7 | 2 | 1 | 2 | 1 | 1 | 1 | 1 | 3 | 1 | 2 | 1 | 3 | 6 | 4 | 1 | 1 | 1 | 1 | 1 | 1 |
| Rev2                       | 7 | 3 | 7 | 2 | 1 | 1 | 1 | 1 | 1 | 1 | 4 | 3 | 1 | 1 | 4 | 5 | 4 | 1 | 1 | 1 | 1 | 1 | 1 |
| Rev3                       | 7 | 3 | 7 | 2 | 1 | 1 | 1 | 1 | 1 | 1 | 4 | 2 | 1 | 1 | 6 | 6 | 4 | 1 | 1 | 1 | 1 | 1 | 1 |
| Rev4                       | 7 | 3 | 7 | 2 | 1 | 3 | 1 | 1 | 1 | 1 | 4 | 2 | 1 | 1 | 5 | 6 | 4 | 1 | 1 | 1 | 1 | 1 | 1 |
| <b>CRA_2016 [41]</b>       |   |   |   |   |   |   |   |   |   |   |   |   |   |   |   |   |   |   |   |   |   |   |   |
| Rev1                       | 5 | 5 | 7 | 6 | 1 | 4 | 5 | 3 | 7 | 3 | 7 | 5 | 2 | 1 | 5 | 7 | 4 | 1 | 1 | 1 | 1 | 1 | 4 |
| Rev2                       | 7 | 5 | 7 | 6 | 1 | 5 | 4 | 3 | 6 | 4 | 6 | 5 | 3 | 1 | 6 | 7 | 4 | 1 | 1 | 1 | 1 | 1 | 4 |
| Rev3                       | 7 | 5 | 7 | 5 | 1 | 6 | 5 | 3 | 6 | 1 | 5 | 6 | 1 | 1 | 5 | 6 | 4 | 1 | 1 | 2 | 1 | 1 | 6 |
| Rev4                       | 6 | 5 | 7 | 5 | 1 | 6 | 6 | 4 | 6 | 6 | 6 | 6 | 1 | 1 | 5 | 6 | 4 | 2 | 1 | 1 | 1 | 1 | 6 |
| <b>CRA_multi_2017 [22]</b> |   |   |   |   |   |   |   |   |   |   |   |   |   |   |   |   |   |   |   |   |   |   |   |
| Rev1                       | 7 | 3 | 7 | 5 | 1 | 7 | 1 | 1 | 1 | 1 | 5 | 3 | 2 | 1 | 5 | 7 | 2 | 1 | 1 | 1 | 1 | 1 | 1 |
| Rev2                       | 7 | 3 | 7 | 5 | 1 | 7 | 1 | 1 | 1 | 2 | 5 | 2 | 1 | 1 | 5 | 7 | 3 | 1 | 1 | 1 | 1 | 1 | 1 |
| Rev3                       | 7 | 3 | 7 | 4 | 2 | 6 | 1 | 1 | 1 | 1 | 5 | 5 | 1 | 1 | 5 | 5 | 3 | 1 | 1 | 1 | 2 | 1 | 1 |
| Rev4                       | 7 | 5 | 6 | 5 | 1 | 7 | 1 | 1 | 1 | 1 | 5 | 1 | 1 | 1 | 5 | 7 | 4 | 1 | 2 | 1 | 1 | 1 | 1 |
| <b>CSE_2013 [37]</b>       |   |   |   |   |   |   |   |   |   |   |   |   |   |   |   |   |   |   |   |   |   |   |   |
| Rev1                       | 7 | 1 | 6 | 3 | 1 | 6 | 1 | 1 | 2 | 1 | 5 | 5 | 1 | 1 | 5 | 6 | 7 | 3 | 1 | 1 | 1 | 1 | 1 |
| Rev2                       | 7 | 3 | 6 | 4 | 1 | 6 | 1 | 1 | 3 | 1 | 5 | 3 | 1 | 1 | 6 | 6 | 7 | 3 | 1 | 1 | 1 | 1 | 1 |
| Rev3                       | 7 | 1 | 7 | 2 | 1 | 7 | 1 | 1 | 2 | 1 | 5 | 3 | 1 | 1 | 6 | 6 | 6 | 3 | 1 | 1 | 2 | 1 | 1 |
| Rev4                       | 7 | 2 | 6 | 3 | 1 | 5 | 1 | 1 | 1 | 1 | 5 | 3 | 1 | 1 | 5 | 4 | 7 | 3 | 1 | 1 | 1 | 1 | 1 |
| <b>EULAR_2006 [18]</b>     |   |   |   |   |   |   |   |   |   |   |   |   |   |   |   |   |   |   |   |   |   |   |   |
| Rev1                       | 5 | 5 | 7 | 5 | 1 | 1 | 7 | 7 | 5 | 3 | 6 | 5 | 2 | 1 | 5 | 7 | 7 | 1 | 2 | 5 | 1 | 4 | 1 |



|                              |   |   |   |   |   |   |   |   |   |   |   |   |   |   |   |   |   |   |   |   |   |   |   |
|------------------------------|---|---|---|---|---|---|---|---|---|---|---|---|---|---|---|---|---|---|---|---|---|---|---|
| <b>Rev2</b>                  | 6 | 5 | 7 | 5 | 1 | 1 | 7 | 7 | 6 | 5 | 6 | 6 | 1 | 1 | 6 | 7 | 6 | 1 | 4 | 6 | 1 | 4 | 1 |
| <b>Rev3</b>                  | 7 | 7 | 7 | 5 | 1 | 1 | 7 | 7 | 6 | 5 | 7 | 6 | 1 | 1 | 7 | 7 | 7 | 1 | 1 | 5 | 1 | 1 | 1 |
| <b>Rev4</b>                  | 6 | 5 | 7 | 5 | 1 | 2 | 7 | 7 | 6 | 4 | 5 | 6 | 1 | 6 | 6 | 6 | 6 | 1 | 3 | 5 | 1 | 3 | 1 |
| <b>EULAR_2011 [17]</b>       |   |   |   |   |   |   |   |   |   |   |   |   |   |   |   |   |   |   |   |   |   |   |   |
| <b>Rev1</b>                  | 6 | 5 | 7 | 4 | 1 | 7 | 4 | 1 | 7 | 7 | 7 | 7 | 2 | 1 | 5 | 7 | 7 | 2 | 1 | 2 | 1 | 4 | 4 |
| <b>Rev2</b>                  | 6 | 5 | 7 | 5 | 1 | 3 | 4 | 7 | 7 | 4 | 7 | 7 | 1 | 1 | 6 | 7 | 7 | 1 | 1 | 5 | 1 | 4 | 4 |
| <b>Rev3</b>                  | 7 | 5 | 7 | 6 | 1 | 7 | 4 | 4 | 7 | 7 | 7 | 7 | 1 | 1 | 6 | 7 | 7 | 1 | 1 | 4 | 1 | 4 | 6 |
| <b>Rev4</b>                  | 7 | 5 | 7 | 5 | 1 | 6 | 4 | 6 | 6 | 6 | 7 | 7 | 1 | 1 | 6 | 6 | 6 | 1 | 2 | 4 | 1 | 3 | 4 |
| <b>EULAR_2016 [16]</b>       |   |   |   |   |   |   |   |   |   |   |   |   |   |   |   |   |   |   |   |   |   |   |   |
| <b>Rev1</b>                  | 7 | 7 | 7 | 6 | 5 | 7 | 5 | 2 | 7 | 7 | 7 | 7 | 6 | 1 | 7 | 7 | 7 | 2 | 2 | 5 | 1 | 1 | 4 |
| <b>Rev2</b>                  | 7 | 1 | 7 | 6 | 5 | 7 | 5 | 2 | 7 | 7 | 6 | 7 | 6 | 3 | 7 | 7 | 7 | 4 | 1 | 6 | 1 | 1 | 4 |
| <b>Rev3</b>                  | 5 | 5 | 7 | 5 | 5 | 5 | 5 | 1 | 6 | 6 | 5 | 6 | 6 | 2 | 5 | 6 | 6 | 4 | 1 | 4 | 1 | 1 | 4 |
| <b>Rev4</b>                  | 6 | 6 | 7 | 6 | 5 | 7 | 5 | 3 | 5 | 7 | 6 | 6 | 6 | 2 | 7 | 7 | 7 | 2 | 1 | 5 | 1 | 3 | 4 |
| <b>FMOH_2014 [44]</b>        |   |   |   |   |   |   |   |   |   |   |   |   |   |   |   |   |   |   |   |   |   |   |   |
| <b>Rev1</b>                  | 7 | 3 | 7 | 6 | 1 | 4 | 1 | 1 | 1 | 1 | 2 | 1 | 1 | 1 | 3 | 1 | 4 | 1 | 1 | 2 | 1 | 1 | 1 |
| <b>Rev2</b>                  | 7 | 3 | 7 | 5 | 1 | 7 | 1 | 1 | 1 | 1 | 2 | 1 | 1 | 1 | 4 | 4 | 4 | 1 | 2 | 3 | 1 | 1 | 1 |
| <b>Rev3</b>                  | 6 | 2 | 5 | 5 | 1 | 6 | 1 | 1 | 1 | 1 | 1 | 2 | 1 | 1 | 2 | 7 | 6 | 1 | 1 | 1 | 1 | 1 | 1 |
| <b>Rev4</b>                  | 6 | 3 | 7 | 5 | 1 | 6 | 1 | 1 | 1 | 1 | 3 | 2 | 1 | 1 | 3 | 6 | 3 | 1 | 1 | 3 | 1 | 1 | 1 |
| <b>JSGNAM_2011 [48]</b>      |   |   |   |   |   |   |   |   |   |   |   |   |   |   |   |   |   |   |   |   |   |   |   |
| <b>Rev1</b>                  | 5 | 5 | 7 | 2 | 4 | 4 | 1 | 1 | 6 | 3 | 6 | 3 | 2 | 1 | 7 | 7 | 4 | 1 | 1 | 1 | 1 | 1 | 1 |
| <b>Rev2</b>                  | 6 | 5 | 7 | 2 | 4 | 4 | 1 | 1 | 7 | 4 | 6 | 4 | 3 | 1 | 7 | 6 | 7 | 1 | 1 | 1 | 1 | 1 | 1 |
| <b>Rev3</b>                  | 5 | 7 | 7 | 1 | 4 | 4 | 1 | 1 | 7 | 1 | 7 | 4 | 2 | 1 | 7 | 6 | 7 | 1 | 1 | 1 | 1 | 1 | 1 |
| <b>Rev4</b>                  | 5 | 5 | 7 | 2 | 5 | 4 | 2 | 1 | 7 | 5 | 6 | 4 | 3 | 1 | 6 | 6 | 5 | 1 | 1 | 1 | 1 | 1 | 1 |
| <b>MOH_MSR_AMM_2008 [49]</b> |   |   |   |   |   |   |   |   |   |   |   |   |   |   |   |   |   |   |   |   |   |   |   |
| <b>Rev1</b>                  | 6 | 7 | 7 | 5 | 1 | 7 | 4 | 1 | 5 | 1 | 6 | 5 | 2 | 4 | 7 | 7 | 7 | 2 | 3 | 1 | 1 | 4 | 1 |
| <b>Rev2</b>                  | 7 | 7 | 7 | 5 | 3 | 7 | 4 | 1 | 6 | 2 | 6 | 4 | 3 | 5 | 6 | 7 | 7 | 3 | 5 | 1 | 1 | 4 | 2 |
| <b>Rev3</b>                  | 7 | 7 | 7 | 7 | 1 | 7 | 4 | 1 | 6 | 1 | 6 | 5 | 2 | 5 | 7 | 7 | 7 | 1 | 1 | 1 | 1 | 4 | 2 |
| <b>Rev4</b>                  | 7 | 7 | 7 | 5 | 1 | 7 | 5 | 1 | 6 | 2 | 5 | 5 | 3 | 5 | 6 | 6 | 6 | 1 | 3 | 1 | 1 | 4 | 2 |
| <b>PRA_2008 [50]</b>         |   |   |   |   |   |   |   |   |   |   |   |   |   |   |   |   |   |   |   |   |   |   |   |
| <b>Rev1</b>                  | 5 | 3 | 5 | 4 | 5 | 7 | 5 | 1 | 7 | 4 | 7 | 5 | 1 | 5 | 5 | 7 | 4 | 2 | 1 | 2 | 1 | 1 | 2 |

|                           |   |   |   |   |   |   |   |   |   |   |   |   |   |   |   |   |   |   |   |   |   |   |   |
|---------------------------|---|---|---|---|---|---|---|---|---|---|---|---|---|---|---|---|---|---|---|---|---|---|---|
| <b>Rev2</b>               | 7 | 7 | 4 | 3 | 5 | 7 | 5 | 6 | 7 | 4 | 6 | 4 | 2 | 5 | 5 | 6 | 7 | 3 | 2 | 3 | 1 | 1 | 4 |
| <b>Rev3</b>               | 7 | 7 | 7 | 4 | 5 | 7 | 5 | 5 | 7 | 6 | 7 | 5 | 1 | 5 | 6 | 7 | 5 | 1 | 1 | 2 | 1 | 1 | 2 |
| <b>Rev4</b>               | 7 | 5 | 5 | 4 | 5 | 7 | 5 | 5 | 7 | 5 | 6 | 5 | 1 | 5 | 5 | 6 | 4 | 1 | 1 | 3 | 1 | 1 | 2 |
| <b>SAMA_2003 [51]</b>     |   |   |   |   |   |   |   |   |   |   |   |   |   |   |   |   |   |   |   |   |   |   |   |
| <b>Rev1</b>               | 6 | 3 | 7 | 5 | 1 | 4 | 1 | 1 | 1 | 5 | 7 | 3 | 2 | 3 | 3 | 6 | 7 | 1 | 1 | 2 | 1 | 7 | 1 |
| <b>Rev2</b>               | 7 | 3 | 7 | 4 | 1 | 5 | 1 | 1 | 1 | 5 | 7 | 2 | 4 | 2 | 5 | 7 | 4 | 1 | 5 | 1 | 1 | 7 | 1 |
| <b>Rev3</b>               | 7 | 3 | 7 | 2 | 1 | 5 | 1 | 1 | 1 | 1 | 7 | 3 | 1 | 1 | 6 | 7 | 7 | 1 | 1 | 1 | 1 | 7 | 1 |
| <b>Rev4</b>               | 6 | 3 | 7 | 5 | 2 | 4 | 1 | 1 | 1 | 5 | 5 | 3 | 3 | 5 | 6 | 6 | 6 | 1 | 1 | 1 | 1 | 7 | 1 |
| <b>SER_2013 [46]</b>      |   |   |   |   |   |   |   |   |   |   |   |   |   |   |   |   |   |   |   |   |   |   |   |
| <b>Rev1</b>               | 7 | 6 | 7 | 7 | 5 | 4 | 3 | 1 | 7 | 3 | 7 | 5 | 2 | 5 | 5 | 6 | 4 | 2 | 2 | 2 | 1 | 7 | 2 |
| <b>Rev2</b>               | 7 | 6 | 7 | 6 | 5 | 3 | 3 | 1 | 7 | 5 | 6 | 4 | 2 | 7 | 6 | 7 | 4 | 4 | 5 | 3 | 1 | 5 | 2 |
| <b>Rev3</b>               | 7 | 7 | 7 | 7 | 5 | 5 | 3 | 1 | 7 | 3 | 7 | 6 | 2 | 7 | 7 | 7 | 4 | 4 | 1 | 4 | 1 | 7 | 2 |
| <b>Rev4</b>               | 7 | 6 | 7 | 7 | 5 | 5 | 4 | 1 | 7 | 5 | 7 | 4 | 2 | 7 | 5 | 7 | 5 | 4 | 1 | 2 | 1 | 7 | 2 |
| <b>SIR_2013 [45]</b>      |   |   |   |   |   |   |   |   |   |   |   |   |   |   |   |   |   |   |   |   |   |   |   |
| <b>Rev1</b>               | 7 | 7 | 7 | 6 | 1 | 7 | 4 | 7 | 5 | 3 | 7 | 5 | 2 | 1 | 7 | 7 | 4 | 2 | 1 | 4 | 1 | 1 | 1 |
| <b>Rev2</b>               | 7 | 7 | 7 | 6 | 1 | 4 | 4 | 7 | 7 | 5 | 6 | 5 | 1 | 1 | 6 | 7 | 4 | 4 | 1 | 6 | 1 | 1 | 1 |
| <b>Rev3</b>               | 7 | 7 | 7 | 6 | 1 | 6 | 4 | 7 | 7 | 6 | 7 | 6 | 1 | 1 | 6 | 7 | 4 | 1 | 1 | 4 | 1 | 1 | 1 |
| <b>Rev4</b>               | 6 | 6 | 7 | 7 | 1 | 6 | 4 | 6 | 6 | 3 | 5 | 6 | 1 | 1 | 6 | 6 | 4 | 3 | 1 | 4 | 1 | 1 | 1 |
| <b>T2T_2016 [39]</b>      |   |   |   |   |   |   |   |   |   |   |   |   |   |   |   |   |   |   |   |   |   |   |   |
| <b>Rev1</b>               | 6 | 7 | 7 | 5 | 5 | 1 | 7 | 7 | 7 | 7 | 3 | 3 | 2 | 1 | 4 | 6 | 7 | 3 | 1 | 1 | 1 | 4 | 2 |
| <b>Rev2</b>               | 7 | 7 | 7 | 6 | 5 | 1 | 7 | 7 | 7 | 7 | 4 | 5 | 2 | 5 | 6 | 7 | 7 | 1 | 1 | 1 | 1 | 4 | 4 |
| <b>Rev3</b>               | 5 | 7 | 7 | 5 | 5 | 2 | 7 | 6 | 6 | 6 | 2 | 3 | 2 | 1 | 5 | 6 | 6 | 3 | 1 | 1 | 1 | 3 | 6 |
| <b>Rev4</b>               | 7 | 7 | 7 | 5 | 5 | 1 | 7 | 6 | 6 | 6 | 4 | 5 | 1 | 1 | 5 | 6 | 6 | 1 | 1 | 1 | 1 | 3 | 6 |
| <b>TRA_2016 [38]</b>      |   |   |   |   |   |   |   |   |   |   |   |   |   |   |   |   |   |   |   |   |   |   |   |
| <b>Rev1</b>               | 5 | 3 | 7 | 5 | 1 | 4 | 1 | 1 | 1 | 1 | 6 | 2 | 2 | 1 | 6 | 7 | 7 | 1 | 1 | 2 | 1 | 1 | 1 |
| <b>Rev2</b>               | 6 | 3 | 7 | 5 | 1 | 7 | 1 | 1 | 1 | 2 | 6 | 2 | 1 | 1 | 6 | 7 | 7 | 1 | 3 | 3 | 1 | 1 | 1 |
| <b>Rev3</b>               | 6 | 3 | 7 | 5 | 3 | 1 | 1 | 2 | 1 | 1 | 5 | 4 | 1 | 1 | 5 | 6 | 6 | 1 | 1 | 2 | 1 | 1 | 1 |
| <b>Rev4</b>               | 6 | 5 | 7 | 5 | 1 | 3 | 1 | 1 | 1 | 1 | 5 | 2 | 1 | 1 | 5 | 6 | 6 | 1 | 1 | 2 | 1 | 1 | 1 |
| <b>UTAustin_2009 [52]</b> |   |   |   |   |   |   |   |   |   |   |   |   |   |   |   |   |   |   |   |   |   |   |   |
| <b>Rev1</b>               | 7 | 3 | 7 | 4 | 1 | 4 | 4 | 1 | 7 | 3 | 4 | 5 | 2 | 1 | 3 | 4 | 4 | 1 | 1 | 1 | 1 | 4 | 2 |

1  
2  
3  
4  
5  
6  
7  
8  
9  
10  
11  
12  
13  
14  
15  
16  
17  
18  
19  
20  
21  
22  
23  
24  
25  
26  
27  
28  
29  
30  
31  
32  
33  
34  
35  
36  
37  
38  
39  
40  
41  
42  
43  
44  
45  
46

|             |   |   |   |   |   |   |   |   |   |   |   |   |   |   |   |   |   |   |   |   |   |   |   |
|-------------|---|---|---|---|---|---|---|---|---|---|---|---|---|---|---|---|---|---|---|---|---|---|---|
| <b>Rev2</b> | 7 | 3 | 7 | 2 | 1 | 4 | 4 | 1 | 7 | 2 | 4 | 5 | 2 | 1 | 5 | 6 | 7 | 2 | 3 | 1 | 1 | 4 | 1 |
| <b>Rev3</b> | 7 | 2 | 7 | 2 | 1 | 4 | 4 | 1 | 7 | 1 | 6 | 5 | 2 | 1 | 6 | 6 | 7 | 1 | 1 | 1 | 1 | 4 | 1 |
| <b>Rev4</b> | 7 | 3 | 7 | 4 | 1 | 4 | 5 | 5 | 7 | 4 | 3 | 6 | 2 | 1 | 5 | 5 | 3 | 1 | 1 | 2 | 1 | 4 | 1 |

For peer review only

1  
2  
3  
4  
5  
6  
7  
8  
9  
10  
11  
12  
13  
14  
15  
16  
17  
18  
19  
20  
21  
22  
23  
24  
25  
26  
27  
28  
29  
30  
31  
32  
33  
34  
35  
36  
37  
38  
39  
40  
41  
42  
43  
44  
45  
46

For peer review only

**Supplementary Table 8. Summary of recommendations for the diagnosis of gout and hyperuricemia by included guidance document**

IE: insufficient evidence; MSU: monosodium urate; NA: not applicable; NG: not given; SUA: serum uric acid.

|                                                                          | SAMA_2003 [51] | EULAR_2006 [18] | MOH_MSR_AMM_2008 [49] | PRA_2008 [50] | EULAR_2011 [17] | JSGNAM_2011 [48] | CCCP_2012 [47] | 3e_2013 [36] | CSE_2013 [37] | SER_2013 [46] | SIR_2013 [45] | 3e_PT_2014 [40] | 3e_AU_NZ_2015 [43] | ACR_EULAR_2015 [42] | CRA_2016 [41] | TRA_2016 [38] | ACP_2017 [19, 20] | CRA_multi_2017 [22] |
|--------------------------------------------------------------------------|----------------|-----------------|-----------------------|---------------|-----------------|------------------|----------------|--------------|---------------|---------------|---------------|-----------------|--------------------|---------------------|---------------|---------------|-------------------|---------------------|
| <b>Diagnosis of gout</b>                                                 | +              | +               | +                     | NG            | +               | NG               | NG             | +            | NG            | +             | NG            | +               | +                  | +                   | +             | +             | +                 | +                   |
| _Clinical manifestations                                                 | +              | +               | +                     | NA            | +               | NA               | NA             | +            | NA            | +             | NA            | +               | +                  | +                   | +             | +             | +                 | +                   |
| _Laboratory results                                                      | +              | +               | -                     | NA            | +               | NA               | NA             | +            | NA            | +             | NA            | +               | +                  | +                   | +             | +             | +                 | +                   |
| _Imaging results                                                         | -              | +*              | -                     | NA            | -               | NA               | NA             | +            | NA            | +             | NA            | +               | +                  | +                   | +             | +             | IE                | +                   |
| _MSU crystal as definitive diagnosis                                     | +              | +               | +                     | NA            | +               | NA               | NA             | +            | NA            | +             | NA            | +               | +                  | +                   | +             | +             | +                 | +                   |
| Monitor urate deposits clearance by imaging                              | -              | -               | -                     | -             | -               | -                | -              | -            | -             | IE            | -             | -               | -                  | +                   | -             | -             | -                 | +                   |
| Is the timing to assess urate deposits with imaging techniques provided? | -              | -               | -                     | -             | -               | -                | -              | -            | -             | -             | -             | -               | -                  | -                   | -             | -             | -                 | -                   |
| SUA for hyperuricemia, $\mu\text{mol/L}$ [mg/dL]                         | +              | NG              | +                     | +             | +               | +                | +              | NG           | +             | +             | +             | NG              | NG                 | NG                  | NG            | +             | NG                | +                   |
| _All gender                                                              | 420            | NG              | NG                    | NG            | [6.8]           | [7.0]            | 420 [7.0]      | NG           | NG            | NG            | 404 [6.8]     | NG              | NG                 | NG                  | NG            | [7.0]         | NG                | NG                  |
| _Female                                                                  | NG             | NG              | 360 [6.0]             | 357 [6.0]     | NG              | NG               | NG             | NG           | 360           | [6.0]         | NG            | NG              | NG                 | NG                  | NG            | NG            | NG                | 360                 |
| _Male                                                                    | NG             | NG              | 420 [7.0]             | 416 [7.0]     | NG              | NG               | NG             | NG           | 420           | [7.0]         | NG            | NG              | NG                 | NG                  | NG            | NG            | NG                | 420                 |
| <b>Diagnosis of asymptomatic hyperuricemia</b>                           | NG             | NG              | +                     | +             | NG              | +                | +              | +            | NG            | +             | NG            | NG              | NG                 | NG                  | NG            | +             | NG                | NG                  |
| _Gout flare                                                              | NA             | NA              | -                     | +             | NA              | +                | +              | +            | NA            | +             | NA            | NA              | NA                 | NA                  | NA            | +             | NA                | NA                  |
| _Tophi                                                                   | NA             | NA              | -                     | -             | NA              | +                | -              | +            | NA            | -             | NA            | NA              | NA                 | NA                  | NA            | -             | NA                | NA                  |
| _Additional medical conditions†                                          | NA             | NA              | +                     | +             | NA              | +                | +              | -            | NA            | -             | NA            | NA              | NA                 | NA                  | NA            | +             | NA                | NA                  |

\*Imaging results are considered for chronic gout, but not for early/acute gout.

†Additional medical conditions considered in the definition of asymptomatic hyperuricemia included complications of gout [47], renal disorder [48], signs or symptoms of

1  
2  
3 urate deposition [49], and uric acid nephrolithiasis [50]. One document provided a general statement of any clinical presentations [38]. One document explicitly stated that  
4 the inclusion of patients with pre-existing renal or cardiovascular disease was allowed [36].  
5  
6  
7  
8  
9  
10  
11  
12  
13  
14  
15  
16  
17  
18  
19  
20  
21  
22  
23  
24  
25  
26  
27  
28  
29  
30  
31  
32  
33  
34  
35  
36  
37  
38  
39  
40  
41  
42  
43  
44  
45  
46

For peer review only

**Supplementary Table 9. Summary of recommendations for the treatment of hyperuricemia by included guidance documents**

A: allopurinol; Aft: (to initiate ULT) after an acute attack; B: benzbromarone; CCR: creatinine clearance rate; Cr: serum creatinine; CKD: chronic kidney disease; D: (to initiate ULT) during an acute attack; eGFR: estimated glomerular filtration rate; F: febuxostat; IE: insufficient evidence; m: month(s); NA: not applicable; NG: not given; P: probenecid; RF: renal function; SUA: serum uric acid; U: uricosurics without specification; ULT: urate lowering therapy; w: week(s); y: year.

|                                                                       | SAMA_2003 [51] | MOH_MSR_AMM_2008 [49] | PRA_2008 [50] | UTAustin_2009 [52] | EULAR_2011 [17] | JSGNAM_2011 [48] | ACR_2012 [14, 15] | CCCP_2012 [47] | 3e_2013 [36] | CSE_2013 [37] | SER_2013 [46] | SIR_2013 [45] | 3e_PT_2014 [40] | FMOH_2014 [44] | 3e_AU_NZ_2015 [43] | CRA_2016 [41] | EULAR_2016 [16] | T2T_2016 [39] | TRA_2016 [38] | ACP_2017 [19, 20] | BSR_2017 [21] | CRA_multi_2017 [22] |  |
|-----------------------------------------------------------------------|----------------|-----------------------|---------------|--------------------|-----------------|------------------|-------------------|----------------|--------------|---------------|---------------|---------------|-----------------|----------------|--------------------|---------------|-----------------|---------------|---------------|-------------------|---------------|---------------------|--|
| Upper limit for target SUA, µmol/L [mg/dL]                            |                |                       |               |                    |                 |                  |                   |                |              |               |               |               |                 |                |                    |               |                 |               |               |                   |               |                     |  |
| _General target*                                                      | 300            | 360 [6.0]             | [6.0]         | NG                 | [6.0]           | [6.0]            | [6.0]             | 357 [6.0]      | 360 [6.0]    | 360           | [6.0]         | 360 [6.0]     | 360 [6.0]       | NG             | 360 [6.0]          | 360 [6.0]     | 360 [6.0]       | 360 [6.0]     | 360 [6.0]     | NG                | 360           | 360 [6.0]           |  |
| _Target for serve cases†                                              | NG             | NG                    | NG            | NG                 | [4.0]           | NG               | [5.0]             | NG             | 300          | 300           | NG            | NG            | 300 [5.0]       | NG             | 300                | NG            | 300 [5.0]       | 300 [5.0]     | 300 [5.0]     | NG                | 300           | 300 [5.0]           |  |
| Lower limit for target SUA, µmol/L [mg/dL]                            | NG             | NG                    | NG            | NG                 | NG              | NG               | NG                | NG             | NG           | NG            | NG            | NG            | NG              | NG             | NG                 | NG            | [3.0]           | NG            | NG            | NG                | NG            | 180                 |  |
| Drinking water                                                        | -              | +                     | +             | -                  | -               | +                | -                 | +              | -            | +             | +             | -             | -               | +              | -                  | +             | -               | -             | +             | -                 | +             | +                   |  |
| Urine alkalinisation                                                  | +              | +                     | -             | -                  | +               | -                | +                 | +              | -            | +             | +             | -             | +               | +              | -                  | +             | -               | -             | +             | -                 | +             | +                   |  |
| Indications for ULT                                                   | +              | +                     | +             | -                  | +               | +                | +                 | +              | -            | +             | +             | +             | -               | NG             | -                  | +             | +               | -             | +             | +                 | +             | +                   |  |
| _Recurrent attacks                                                    | +, >2          | +, >3/y               | +             | NA                 | +, >1/y         | +                | +, ≥2/y           | -              | NA           | -             | -             | +             | NA              | NG             | -                  | +, >2/y       | +, ≥2/y         | NA            | -             | +, ≥2/y           | +, ≥2/y       | +                   |  |
| _Tophi                                                                | +              | +                     | +             | NA                 | +               | +                | +                 | -              | NA           | -             | -             | +             | NA              | NG             | NA                 | +             | +               | NA            | +             | +                 | +             | +                   |  |
| _Urate nephrolithiasis                                                | -              | +                     | +             | NA                 | +               | -                | +                 | -              | NA           | +             | -             | -             | NA              | NG             | NA                 | -             | +               | NA            | +             | +                 | +             | +                   |  |
| _Arthropathy                                                          | -              | +                     | -             | NA                 | +               | -                | -                 | -              | NA           | -             | -             | +             | NA              | NG             | NA                 | +             | +               | NA            | +             | -                 | +             | +                   |  |
| _Comorbidities‡                                                       | -              | +                     | +             | NA                 | -               | -                | +                 | +              | NA           | +             | -             | -             | NA              | NG             | NA                 | -             | +               | NA            | -             | +                 | +             | +                   |  |
| _Others§                                                              | +              | +                     | +             | NA                 | -               | -                | -                 | +              | NA           | -             | +             | -             | NA              | NG             | NA                 | -             | +               | NA            | -             | -                 | +             | +                   |  |
| Initiate ULT during or after an acute attack (Aft[time after attack]) | Aft            | Aft                   | NG            | Aft (4-6 w)        | Aft             | Aft (2w)         | D                 | NA             | Aft          | D/ Aft (2w)   | NG            | NG            | Aft             | NG             | NG                 | NG            | IE              | IE            | Aft           | NG                | Aft           | Aft                 |  |
| First line ULT drug(s)                                                | NG             | A                     | A             | NG                 | A, F            | A, B             | A, F              | NG             | A            | NG            | A, F,         | A             | A               | NG             | A                  | NG            | A               | NG            | NG            | NG                | A             | NG                  |  |

|                                                                                          |        |         |    |    |     |             |         |              |          |         |         |         |            |    |           |       |      |     |       |        |          |            |    |    |
|------------------------------------------------------------------------------------------|--------|---------|----|----|-----|-------------|---------|--------------|----------|---------|---------|---------|------------|----|-----------|-------|------|-----|-------|--------|----------|------------|----|----|
|                                                                                          |        |         |    |    |     |             |         |              |          |         | B       |         |            |    |           |       |      |     |       |        |          |            |    |    |
| <b>Second line ULT drug(s)</b>                                                           | NG     | P       | NG | NG | P   | NG          | P       | NG           | U, F     | NG      | NG      | F, P, B | F, B, P, U | NG | P, B, F   | NG    | F, U | NG  | NG    | NG     | F        | NG         |    |    |
| <b>Allopurinol use</b>                                                                   |        |         |    |    |     |             |         |              |          |         |         |         |            |    |           |       |      |     |       |        |          |            |    |    |
| <b>_Maximum dose (mg/d)</b>                                                              | 300    | NG      | NG | NG | 800 | NG          | 800     | 600          | NG       | 600     | 800-900 | 800     | NG         | NG | 900       | NG    | NG   | NG  | 800   | NG     | 900      | 600        |    |    |
| <b>_RF to initiate dose adjustment (eGFR in ml/min/1.73m<sup>2</sup>, CCr in mL/min)</b> | CCr 60 | CCr 80  | NG | NG | NG  | NG          | CK D4   | NG           | NG       | CCr 60  | CCr 140 | CCr 20  | NG         | NG | NG        | NG    | NG   | NG  | NG    | NG     | eGFR 130 | 1.5mg/eGFR |    |    |
| <b>_Starting dose in normal RF (mg/d)</b>                                                | 50-100 | 100-150 | NG | NG | 100 | 50          | ≤100    | 50           | NG       | 100-150 | NG      | 100     | NG         | NG | NG        | 100   | 100  | NG  | 100   | 50-100 | 200      | 50-100     |    |    |
| <b>_HLA-B*5801 gene screening</b>                                                        | -      | -       | -  | -  | -   | -           | +       | -            | -        | +       | -       | -       | -          | NG | -         | -     | -    | -   | +     | -      | +        | +          |    |    |
| <b>Prophylaxis before ULT</b>                                                            | +      | NG      | NG | NG | +   | NG          | NG      | NG           | NG       | NG      | NG      | NG      | NG         | NG | NG        | NG    | NG   | NG  | NG    | NG     | NG       | NG         | NG | NG |
| <b>Prophylaxis with ULT</b>                                                              | +      | +       | NG | NG | +   | +           | +       | NG           | +        | +       | +       | +       | +          | NG | +         | +     | +    | +   | +     | +      | +        | +          | +  | +  |
| <b>Duration for prophylaxis</b>                                                          | 1-3 m  | 1-6 m** | NG | NG | NG  | NG          | 3-6 m†† | NG           | Un-clear | 6m      | >6m     | NG      | >6m        | NG | Vari-ed‡‡ | 3-6 m | NG   | >6m | 3-6 m | >8w    | <6m      | 3-6m       |    |    |
| <b>Pharmacological ULT for asymptomatic hyperuricemia?</b>                               | -      | +       | NG | -  | -   | +           | IE      | +            | IE       | IE      | NG      | NG      | -§§        | NG | IE        | NG    | NG   | IE  | -     | NG     | -        | NG         |    |    |
| <b>_Comorbidities</b>                                                                    | NA     | -       | NA | NA | NA  | +           | NA      | +            | NA       | NA      | NA      | NA      | -          | NG | NA        | NA    | NA   | NA  | NA    | NA     | NA       | NA         | NA | NA |
| <b>_SUA cut-offs, μmol/L [mg/dL]</b>                                                     | NA     | [10-13] | NA | NA | NA  | [8.0-9.0]¶¶ | NA      | [8.0-9.0]*** | NA       | NA      | NA      | NA      | [9.0]      | NG | NA        | NA    | NA   | NA  | NA    | NA     | NA       | NA         | NA | NA |

\* The general target was the target serum uric acid level for long term control recommended for all patients on pharmacological urate lowering therapy.

† The intensive target the intensive target was the target serum uric acid level for long term control recommended for patients with tophi [16, 17, 22, 36, 38, 40, 43], with recurrent attacks [16, 21, 22], or with chronic gouty arthritis [16, 22], or to prevent crystal formation [21], or to improve gout signs and symptoms [14, 15]. One document provided stricter target for any patient with gout [37], and one for patients with severe gout without clear definition [39].

‡ Comorbidities considered as the indication for ULT include renal impairment [14-16, 19-22, 37, 49, 50], cardiovascular risk or cardiovascular diseases [16, 22, 47], glucose intolerance or DM, lipid disorder, and obesity [22].

§ Others indications considered for pharmacological ULT include joint damage [21], diuretic therapy use [21], young age [16, 21, 22] with some documents defined as less than 40 years old [16, 22], high SUA level defined as >8mg/dL (480 μmol/L) [16] or >13mg/dl [50], impending cytotoxic chemotherapy or radiotherapy for lymphoma or



1  
2  
3 leukaemia [49], persistently raised uric acid levels and willingness to continue lifelong therapy [51]. Some documents evaluated SUA levels in patients after lifestyle  
4 modification and indicated pharmacological ULT in individuals with SUA above 6 mg/dL [46], or with SUA above 8mg/dl with CV risk or CVD and above 9mg/dl without  
5 CV risk or CVD [47].  
6

7 || The starting dose of allopurinol in patients with renal impairment should not exceed 1.5mg/eGFR.

8 ¶ Prophylaxis should be continued until the serum urate is normal and the patient has not had any attacks for 1-3 months.

9 \*\* Prophylaxis should be continued until 6 months free of acute attacks or until 1 month with target serum urate level achieved.

10 †† Prophylaxis should be continued for 1) 6 months' duration, 2) 3 months after achieving the target serum urate level for the patient without tophi detected on physical  
11 examination, or 3) 6 months after achieving the target serum urate level, where there has been resolution of tophi previously detected on physical examination.

12 ‡ The duration for prophylaxis varied and depends on the presence of tophi and comorbidities and on serum urate response. But prophylaxis should be continued until the  
13 target SUA is reached or until the tophi has resolved.

14 §§ The recommendations provided were conflict within the same document.

15 ||| Pharmacological urate lowering therapy is recommended in male patients with serum uric acid >13 mg/dL and in female patients with serum uric acid >10 mg/dL.

16 ¶¶ Pharmacological urate lowering therapy is recommended in patients with serum uric acid >8 mg/dL if with complications or >9 mg/dL in all patients.

17 \*\*\* Pharmacological urate lowering therapy is recommended in patients with serum uric acid >8 mg/dL if with cardiovascular disease or cardiovascular risk factors or >9  
18 mg/dL if without cardiovascular disease or cardiovascular risk factors.  
19  
20  
21  
22  
23  
24  
25  
26  
27  
28  
29  
30  
31  
32  
33  
34  
35  
36  
37  
38  
39  
40  
41  
42  
43  
44  
45  
46

**Supplementary Table 10. Summary of recommendations for the treatment of acute gout by included guidance documents**

NG: not given; NSAIDs: non-steroidal anti-inflammatory drugs.

|                              | What is the first line pharmacological treatment option? | Is colchicine recommended to be given as a fixed dose or as a loading dose + followed doses? | Is intra-articular steroids recommended? | What are the indications for intra-articular steroids? | Which line is intra-articular steroids recommended to be? | Is systemic steroids recommended? | What are the indications for systemic steroids?                                                                                                                | Which line of option is systemic steroids recommended to be? |
|------------------------------|----------------------------------------------------------|----------------------------------------------------------------------------------------------|------------------------------------------|--------------------------------------------------------|-----------------------------------------------------------|-----------------------------------|----------------------------------------------------------------------------------------------------------------------------------------------------------------|--------------------------------------------------------------|
| <b>SAMA_2003 [51]</b>        | NSAIDs                                                   | Loading dose + followed doses                                                                | Yes                                      | Contraindicated to NSAIDs and joint accessible         | NG                                                        | Yes                               | Contraindicated or not responding to NSAIDs or polyarthritis                                                                                                   | NG                                                           |
| <b>MOH_MSR_AMM_2008 [49]</b> | NSAIDs                                                   | NG                                                                                           | Yes                                      | NG                                                     | NG                                                        | Yes                               | Elderly people, renal insufficiency, hepatic dysfunction, cardiac failure, peptic ulcer disease, and hypersensitivity to NSAIDs                                | NG                                                           |
| <b>PRA_2008 [50]</b>         | NSAIDs                                                   | NG                                                                                           | NG                                       | NG                                                     | NG                                                        | Yes                               | Contraindicated to NSAIDs                                                                                                                                      | NG                                                           |
| <b>UTAustin_2009 [52]</b>    | NSAIDs                                                   | Loading dose + followed doses                                                                | Yes                                      | Only 1-2 joints is involved                            | Third                                                     | Yes                               | Contraindicated or not responding to NSAIDs and colchicine and polyarthritis                                                                                   | Third                                                        |
| <b>EULAR_2011 [17]</b>       | Colchicine, NSAIDs, glucocorticoids                      | Loading dose + followed doses                                                                | Yes                                      | NG                                                     | NG                                                        | Yes                               | Contraindications to NSAIDs and colchicine                                                                                                                     | First                                                        |
| <b>JSGNAM_2011 [48]</b>      | Colchicine, NSAIDs                                       | Fixed                                                                                        | NG                                       | NG                                                     | NG                                                        | Yes                               | Contraindicated or not responding to NSAIDs or polyarthritis                                                                                                   | Second                                                       |
| <b>ACR_2012 [14, 15]</b>     | NSAIDs, corticosteroids, colchicine                      | Loading dose + followed doses                                                                | Yes                                      | Involvement of 1 or 2 large joints                     | First                                                     | Yes                               | Oral steroids for involvement of 1 or 2 joints or when intra-articular joint injection is impractical. Intravenous steroids for the nothing by mouth patients. | First                                                        |
| <b>3e_2013 [36]</b>          | NSAIDs, colchicine, glucocorticoids                      | NG                                                                                           | Yes                                      | NG                                                     | First                                                     | Yes                               | NG                                                                                                                                                             | First                                                        |
| <b>CSE_2013 [37]</b>         | NSAIDs, colchicine,                                      | NG                                                                                           | NG                                       | NG                                                     | NG                                                        | NG                                | NG                                                                                                                                                             | NG                                                           |

|                            |                                           |                                           |     |                                                                                           |       |     |                                                                                        |        |
|----------------------------|-------------------------------------------|-------------------------------------------|-----|-------------------------------------------------------------------------------------------|-------|-----|----------------------------------------------------------------------------------------|--------|
|                            | corticosteroids                           |                                           |     |                                                                                           |       |     |                                                                                        |        |
| <b>SER_2013 [46]</b>       | NSAIDs                                    | NG                                        | Yes | Monoarthritis                                                                             | NG    | Yes | Contraindicated to NSAIDs                                                              | NG     |
| <b>SIR_2013 [45]</b>       | NSAIDs,<br>colchicine                     | NG                                        | Yes | NG                                                                                        | NG    | Yes | Intolerance or contraindications to NSAIDs and colchicine                              | NG     |
| <b>3e_PT_2014 [40]</b>     | Colchicine,<br>NSAIDs                     | Fixed low dose                            | Yes | NG                                                                                        | NG    | Yes | NG                                                                                     | NG     |
| <b>FMOH_2014 [44]</b>      | NG                                        | NG                                        | NG  | NG                                                                                        | NG    | NG  | NG                                                                                     | NG     |
| <b>3e_AU_NZ_2015 [43]</b>  | NSAIDs,<br>colchicine,<br>glucocorticoids | NG                                        | Yes | NG                                                                                        | First | Yes | NG                                                                                     | First  |
| <b>CRA_2016 [41]</b>       | NSAIDs                                    | NG                                        | NG  | NG                                                                                        | NG    | Yes | Contraindications to NSAIDs and colchicine                                             | NG     |
| <b>EULAR_2016 [16]</b>     | Colchicine,<br>NSAIDs,<br>corticosteroid  | Loading dose +<br>followed doses          | Yes | NG                                                                                        | First | Yes | NG                                                                                     | First  |
| <b>T2T_2016 [39]</b>       | Anti-inflammatory<br>medications          | NG                                        | NG  | NG                                                                                        | NG    | NG  | NG                                                                                     | NG     |
| <b>TRA_2016 [38]</b>       | NSAIDs                                    | Fixed or Loading dose<br>+ followed doses | Yes | Involvement of 1-2 major<br>joints, contraindications<br>to both colchicine and<br>NSAIDs | NG    | Yes | Contraindications to NSAIDs and colchicine                                             | NG     |
| <b>ACP_2017 [19, 20]</b>   | Corticosteroids                           | Loading dose +<br>followed doses          | NG  | NG                                                                                        | NG    | Yes | If not contraindicated.                                                                | First  |
| <b>BSR_2017 [21]</b>       | NSAIDs,<br>colchicine                     | NG                                        | Yes | Patients with acute illness<br>and comorbidity                                            | First | Yes | Intolerance to NSAIDs and colchicine and<br>intra-articular injection is not feasible. | Second |
| <b>CRA_multi_2017 [22]</b> | NSAIDs,<br>colchicine                     | Loading dose +<br>followed doses          | Yes | Involvement of 1-2 major<br>joints and not responding<br>to systemic treatment            | NG    | Yes | Contraindicated to or not responding to<br>NSAIDs and colchicine                       | NG     |

**Supplementary Table 11. Summary of recommendations for the treatment of tophi by included guidance documents**

A: allopurinol; B: benzbromarone; F: febuxostat; NA: not applicable; NG: not given; P: pegloticase; R: rasburicase; ULT: urate lowering therapy; WH: wound healing.

|                                      | SAMA_2003 [51] | MOH_MSR_AMM_2008 [49] | PRA_2008 [50] | UTAustin_2009 [52] | EULAR_2011 [17] | JSGNAM_2011 [48] | ACR_2012 [14, 15] | 3e_2013 [36] | CSE_2013 [37] | SER_2013 [46] | SIR_2013 [45] | 3e_PT_2014 [40] | FMOH_2014 [44] | 3e_AU_NZ_2015 [43] | CRA_2016 [41] | EULAR_2016 [16] | T2T_2016 [39] | TRA_2016 [38] | ACP_2017 [19, 20] | BSR_2017 [21] | CRA_multi_2017 [22] |
|--------------------------------------|----------------|-----------------------|---------------|--------------------|-----------------|------------------|-------------------|--------------|---------------|---------------|---------------|-----------------|----------------|--------------------|---------------|-----------------|---------------|---------------|-------------------|---------------|---------------------|
| <b>Is surgery recommended?</b>       | +              | +                     | NG            | NG                 | NG              | +                | NG                | +            | NG            | NG            | NG            | +               | NG             | +                  | NG            | NG              | IE            | +             | NG                | -             | +                   |
| <b>Indications for surgery</b>       | NG             | +                     | NG            | NG                 | NG              | NG               | NG                | +            | NG            | NG            | NG            | NG              | NG             | +                  | NG            | NG              | NG            | +             | NG                | NG            | +                   |
| <b>_Nerve compression</b>            | NA             | -                     | NA            | NA                 | NA              | NA               | NA                | +            | NA            | NA            | NA            | NA              | NA             | +                  | NA            | NA              | NA            | +             | NA                | NA            | +                   |
| <b>_Infection</b>                    | NA             | -                     | NA            | NA                 | NA              | NA               | NA                | +            | NA            | NA            | NA            | NA              | NA             | +                  | NA            | NA              | NA            | +             | NA                | NA            | -                   |
| <b>_Mechanical impingement</b>       | NA             | -                     | NA            | NA                 | NA              | NA               | NA                | +            | NA            | NA            | NA            | NA              | NA             | +                  | NA            | NA              | NA            | -             | NA                | NA            | -                   |
| <b>_Loss of mobility</b>             | NA             | +                     | NA            | NA                 | NA              | NA               | NA                | -            | NA            | NA            | NA            | NA              | NA             | -                  | NA            | NA              | NA            | +             | NA                | NA            | -                   |
| <b>_Severe pain</b>                  | NA             | +                     | NA            | NA                 | NA              | NA               | NA                | -            | NA            | NA            | NA            | NA              | NA             | -                  | NA            | NA              | NA            | +             | NA                | NA            | -                   |
| <b>_Tophaceous ulcer</b>             | NA             | +                     | NA            | NA                 | NA              | NA               | NA                | -            | NA            | NA            | NA            | NA              | NA             | -                  | NA            | NA              | NA            | -             | NA                | NA            | +                   |
| <b>_Others*</b>                      | NA             | +                     | NA            | NA                 | NA              | NA               | NA                | -            | NA            | NA            | NA            | NA              | NA             | -                  | NA            | NA              | NA            | +             | NA                | NA            | +                   |
| <b>Risks of surgery</b>              | WH             | NG                    | NG            | NG                 | NG              | NG               | NG                | NG           | NG            | NG            | NG            | NG              | NG             | NG                 | NG            | NG              | NG            | NG            | NG                | NG            | NG                  |
| <b>Is long-term ULT recommended?</b> | +              | +                     | +             | NG                 | +               | +                | +                 | +            | +             | +             | +             | +               | NG             | +                  | +             | +               | +             | +             | +                 | +             | +                   |
| <b>Is any ULT drug recommended?</b>  | A              | -                     | -             | -                  | P               | -                | P                 | -            | B             | F             | NA            | -               | -              | P                  | -             | P               | -             | -             | -                 | P, R          | -                   |

\* Other indications for surgery include large tophi [22], persistent tophi [22], joint deformation [38], major joint destruction [49], pressure symptoms [49], and cosmetic [49].

Supplementary Figure 1. Standardized domain scores by the year of publication



## Supplementary File 1. Instructions for Guideline Appraisal Using the AGREE II Instrument

### TRAINING MATERIALS

- Online tutorial: <http://www.agreetrust.org/resource-centre/agree-ii-training-tools/>
- User's Manual:  
[http://www.agreetrust.org/wp-content/uploads/2013/06/AGREE\\_II\\_Users\\_Manual\\_and\\_23-item\\_Instrument\\_ENGLISH.pdf](http://www.agreetrust.org/wp-content/uploads/2013/06/AGREE_II_Users_Manual_and_23-item_Instrument_ENGLISH.pdf)

### PROLOGUE

- The Appraisal of Guidelines for REsearch & Evaluation (AGREE) Instrument is an international, validated and rigorously developed tool to evaluate the quality of clinical practice guidelines and consensus statements.
- The AGREE II instrument was published in 2010 and consists of 23 key items organized within 6 domains followed by 2 global rating items ("Overall Assessment"). Each domain captures a unique dimension of guideline quality.
  - Scope and purpose
  - Stakeholder involvement
  - Rigour of development
  - Clarity of presentation
  - Applicability
  - Editorial independence.
- Reviewers score each item on a 7-point Likert Scale.
  - 1 - Strongly disagree
  - 7 - Strongly agree
  - For the majority of items, we use an 'add-up' strategy to score, that is, corresponding scores will be added to 1' if information on predefined aspects is provided. For only one item, we subtract scores from 7'.
- Domain scores will be calculated as: (obtained score-minimal possible score)/(maximal possible score-minimal possible score)

### DETAILED INSTRUCTIONS FOR SCORING

(adapted from AGREE II User's Manual [28])

#### Domain 1 Scope and Purpose

**Item 1 Objectives: The overall objective(s) of the guideline is (are) specifically described.**

#### Instructions:

Information on three aspects should be provided (add corresponding scores for each aspect, 5' in total):

a) Health intent, i.e., prevention, screening, diagnosis, treatment, etc. (2');

b) Expected benefit or outcome (2');

- *Clarification:* If gout epidemiology is provided as background information (i.e., the importance or significance of the diagnosis and management of gout/hyperuricemia is stated), 1' will be given. If clear statements, such as "to prevent (long term) complications of patients with diabetes mellitus" "to lower the risk of subsequent vascular events in patients with previous myocardial infarction", are provided, 2' will be given.

c) Target, e.g., patient population, society (1').

Performance: Is the item well written and is the content easy to find? (1')

1  
2 Related *Report Criteria* from *User's Manual*: • health intent(s) (i.e., prevention, screening, diagnosis,  
3 treatment, etc.) • expected benefit or outcome • target(s) (e.g., patient population, society)  
4

5  
6 **Item 2 Questions: The health question(s) covered by the guideline is (are) specifically described.**

7 Instructions:

8 Information on five aspects should be provided (add corresponding scores for each aspect, 5' in total):  
9

- 10 a) Target population (2');  
11 b) Intervention or exposure (if appropriate, 1');  
12 c) Comparisons (if appropriate, 1');  
13 d) Outcome (1');  
14 e) Health care setting or context (1').

15 Performance: Is the item well written and is the content easy to find? (1')  
16  
17

18 Note:

- 19 1) If c) is not appropriate, no score will be subtracted.  
20 2) It is not necessary to have this information provided in questions. Reviewers can try to paraphrase  
21 2-3 key recommendations into questions to see the information above is provided and score based  
22 on paraphrased questions.  
23  
24

25  
26 Related *Report Criteria* from *User's Manual*: • target population • intervention(s) or exposure(s) •  
27 comparisons (if appropriate) • outcome(s) • health care setting or context  
28  
29

30  
31 **Item 3 Population: The population (patients, public, etc.) to whom the guideline is meant to apply  
32 is specifically described.**

33 Instructions:

34 A default full score (7') should be considered. Subtract 1-2 points where the population is not clearly  
35 described or where the descriptions in the guideline is contradictory (e.g., a guideline stating "to treat  
36 asymptomatic hyperuricaemia" in the introduction, while stating "to treat hyperuricaemia and gout" in the  
37 title and providing no specific definition of patients' condition in recommendations).  
38  
39  
40  
41

42 Related *Report Criteria* from *User's Manual*: • target population, gender and age • clinical condition (if  
43 relevant) • severity/stage of disease (if relevant) • comorbidities (if relevant) • excluded populations (if  
44 relevant)  
45  
46

47 **Domain 2 Stakeholder Involvement**

48 **Item 4 Group Membership: The guideline development group includes individuals from all  
49 relevant professional groups.**

50 Instructions:

51 Information on two aspects should be provided (add corresponding scores for each aspect, 5' in total):  
52

- 53 a) The guideline development group is stated (1');  
54 b) For each member of the guideline development group, the following information is included (1' each):  
55 name (1'), discipline/content expertise (e.g., neurosurgeon, methodologist, 1'), institution (e.g., St. Peter's  
56 hospital, 1'), a description of the member's role in the guideline development group (1')  
57 - *Clarification*: Please subtract 1' if no methodologist (i.e., epidemiologist) is inferred from the  
58 discipline/content expertise.  
59  
60

Performance: Is the item well written and is the content easy to find? (1')

Note: Where the relation between the guideline development group and the authors is unclear, the authors of the guidance document will be considered as equivalent to the guideline development group.

Related *Report Criteria* from *User's Manual*: • For each member of the guideline development group, the following information is included: name, discipline/content expertise (e.g., neurosurgeon, methodologist), institution (e.g., St. Peter's hospital), geographical location (e.g., Seattle, WA), a description of the member's role in the guideline development group

**Item 5 Target Population Preferences and Views: The views and preferences of the target population (patients, public, etc.) have been sought.**

Instructions:

Information the following four aspects should be provided (add corresponding scores for each aspect, 6' in total):

- a) Statement of type of strategy used to capture patients'/public's' views and preferences (e.g., participation in the guideline development group, literature review of values and preferences, 2');
- b) Methods by which preferences and views were sought (e.g., evidence from literature, surveys, focus groups, 1');
- c) Outcomes/information gathered on patient/public information (2');
- d) Description of how the information gathered was used to inform the guideline development process and/or formation of the recommendations (1')

- *Clarification*: If a patient representative is included in the guideline development panel, scores on aspects a), b), and d) will be given as default.

Related *Report Criteria* from *User's Manual*: • statement of type of strategy used to capture patients'/public's' views and preferences (e.g., participation in the guideline development group, literature review of values and preferences) • methods by which preferences and views were sought (e.g., evidence from literature, surveys, focus groups) • outcomes/information gathered on patient/public information • description of how the information gathered was used to inform the guideline development process and/or formation of the recommendations

**Item 6 Target Users: The target users of the guideline are clearly defined.**

Instructions:

Information on two aspects should be provided (add corresponding scores for each aspect, 6' in total):

- a) Clear description of intended guideline audience (e.g. specialists, family physicians, patients, clinical or institutional leaders/administrators, 3');
- b) Description of how the guideline may be used by its target audience (e.g., to inform clinical decisions, to inform policy, to inform standards of care, 3')

Related *Report Criteria* from *User's Manual*: • clear description of intended guideline audience (e.g. specialists, family physicians, patients, clinical or institutional leaders/administrators) • description of how the guideline may be used by its target audience (e.g., to inform clinical decisions, to inform policy, to inform standards of care)

**Domain 3 Rigour of Development**

**Item 7 Search Methods: Systematic methods were used to search for evidence.**

Instructions:

Information on four aspects should be provided (add corresponding scores for each aspect, 6' in total):



- a) Named electronic database(s) or evidence source(s) where the search was performed (e.g., MEDLINE, EMBASE, PsychINFO, CINAHL, 2');
- b) Time periods searched (e.g., January 1, 2004 to March 31, 2008, 1');
- c) Search terms used (e.g., text words, indexing terms, subheadings, 1');
- d) Full search strategy included (e.g., possibly located in appendix, 2')

Related *Report Criteria* from *User's Manual*: • named electronic database(s) or evidence source(s) where the search was performed (e.g., MEDLINE, EMBASE, PsychINFO, CINAHL) • time periods searched (e.g., January 1, 2004 to March 31, 2008) • search terms used (e.g., text words, indexing terms, subheadings) • full search strategy included (e.g., possibly located in appendix)

### **Item 8 Evidence Selection Criteria: The criteria for selecting the evidence are clearly described.**

#### Instructions:

Information on both inclusion and exclusion criteria should be provided (add corresponding scores for each aspect, 6' in total):

a) Description of the inclusion criteria:

- a1) target population (patient, public, etc.) characteristics (2'),
- a2) study design (2),
- a4) outcomes (1'),

b) Description of the exclusion criteria (if relevant; e.g., French only listed in the inclusion criteria statement could logically preclude non-French listed in the exclusion criteria statement, 1').

Note: if a3), a5), a6), b) is not relevant, no score will be subtracted.

Related *Report Criteria* from *User's Manual*: • description of the inclusion criteria, including: target population (patient, public, etc.) characteristics, study design, comparisons (if relevant), outcomes, language (if relevant), context (if relevant) • description of the exclusion criteria (if relevant; e.g., French only listed in the inclusion criteria statement could logically preclude non-French listed in the exclusion criteria statement)

### **Item 9 Strengths and Limitations of The Evidence: The strengths and limitations of the body of evidence are clearly described.**

#### Instructions:

For each evidence, information on two aspects should be provided. If only some of the evidences report the following information, please first calculate the score based on the most informative evidence (e.g., scored 5'), and then subtract 1' to get the final score (e.g., 5'-1'=4').

For each evidence, both a general statement of the method and detailed descriptions should be provided:

a) A statement of the method used to evaluate the strengths and limitations of the evidence should be provided (3').

b) The stated method should evaluate at least three of the following aspects (add 1' for each aspect, maximum 3'):

- b1) Study design(s);
- b2) Study methodology limitations (e.g., sampling, blinding, allocation concealment, analytical methods);
- b3) Appropriateness/relevance of primary and secondary outcomes considered;
- b4) Consistency of results across studies;
- b5) Direction of results across studies;
- b6) Magnitude of benefit versus magnitude of harm;

1  
2 b7) Applicability to practice context  
3

4 Related *Report Criteria* from *User's Manual*: • descriptions of how the body of evidence was evaluated for  
5 bias and how it was interpreted by members of the guideline development group • aspects upon which to  
6 frame descriptions include: study design(s) included in body of evidence, study methodology limitations  
7 (sampling, blinding, allocation concealment, analytical methods), appropriateness/relevance of primary  
8 and secondary outcomes considered, consistency of results across studies, direction of results across  
9 studies, magnitude of benefit versus magnitude of harm, applicability to practice context  
10  
11  
12

13 **Item 10 Formulation of Recommendations: The methods for formulating the recommendations**  
14 **are clearly described.**

15 Instructions:

16 Information on three aspects should be provide (add 2' for each aspect, 6' in total):

- 17  
18 a) Description of the recommendation development process (e.g., steps used in modified Delphi technique,  
19 voting procedures that were considered, 2');  
20  
21 b) Outcomes of the recommendation development process (e.g., extent to which consensus was reached  
22 using modified Delphi technique, outcome of voting procedures, 2');  
23  
24 c) Description of how the process influenced the recommendations (e.g., results of Delphi technique  
25 influence final recommendation, alignment with recommendations and the final vote, 2')  
26  
27

28 Related *Report Criteria* from *User's Manual*: • description of the recommendation development process  
29 (e.g., steps used in modified Delphi technique, voting procedures that were considered) • outcomes of the  
30 recommendation development process (e.g., extent to which consensus was reached using modified Delphi  
31 technique, outcome of voting procedures) • description of how the process influenced the  
32 recommendations (e.g., results of Delphi technique influence final recommendation, alignment with  
33 recommendations and the final vote)  
34  
35  
36

37 **Item 11 Consideration of Benefits and Harms: The health benefits, side effects, and risks have**  
38 **been considered in formulating the recommendations.**

39 Instructions:

40 For each recommendation, information on four aspects should be provided. If only some of the  
41 recommendations report the following information, please first calculate the score based on the most  
42 informative recommendation (e.g., scored 5'), and subtract 1' to get the final score (e.g., 5'-1'=4').  
43  
44  
45

46 For each recommendation, information on four aspects should be provided (add corresponding scores for  
47 each aspect, 6' in total):

- 48 a) Supporting data and report of benefits (2'); b) Supporting data and report of harms/side effects/risks (2');  
49 - *Clarification*: Data on a) and b) can be provided as references.  
50  
51 c) Reporting of the balance/trade-off between benefits and harms/side effects/risks (1');  
52  
53 d) Recommendations reflect considerations of both benefits and harms/side effects/risks (1')  
54

55 Related *Report Criteria* from *User's Manual*: • supporting data and report of benefits • supporting data and  
56 report of harms/side effects/risks • reporting of the balance/trade-off between benefits and harms/side  
57 effects/risks • recommendations reflect considerations of both benefits and harms/side effects/risks  
58  
59  
60

**Item 12 Link Between Recommendations and Evidence: There is an explicit link between the**  
**recommendations and the supporting evidence.**

**Instructions:**

Information on three aspects should be provided (add 2' for each aspect, 6' in total):

a) The guideline describes how the guideline development group linked and used the evidence to inform recommendations (2');

- *Clarification:* Can be provided as narrative summaries and/or discussions of evidences.

b) Each recommendation is linked to a key evidence description/paragraph and/or reference list (2');

- *Note:* Please subtract 1' if only some recommendations meet criterium b).

c) Recommendations linked to evidence summaries, evidence tables in the results section of the guideline (2')

*Related Report Criteria from User's Manual:* • the guideline describes how the guideline development group linked and used the evidence to inform recommendations • each recommendation is linked to a key evidence description/paragraph and/or reference list • recommendations linked to evidence summaries, evidence tables in the results section of the guideline

**Item 13 External Review: The guideline has been externally reviewed by experts prior to its publication.**

**Instructions:**

Information on five aspects should be provided (add corresponding scores for each aspect, 6' in total):

a) Purpose and intent of the external review (e.g., to improve quality, gather feedback on draft recommendations, assess applicability and feasibility, disseminate evidence, 1');

b) Methods taken to undertake the external review (e.g., rating scale, open-ended questions, 1');

c) Description of the external reviewers (e.g., number, type of reviewers, affiliations, 1');

d) Outcomes/information gathered from the external review (e.g., summary of key findings, 1');

e) Description of how the information gathered was used to inform the guideline development process and/or formation of the recommendations (e.g., guideline panel considered results of review in forming final recommendations, 2')

- *Clarification:* Publication through a peer-reviewed journal can be considered as externally reviewed.

*Note:* If dates of revision and acceptance is provided on the document, it is also considered externally reviewed.

*Related Report Criteria from User's Manual:* • purpose and intent of the external review (e.g., to improve quality, gather feedback on draft recommendations, assess applicability and feasibility, disseminate evidence) • methods taken to undertake the external review (e.g., rating scale, open-ended questions) • description of the external reviewers (e.g., number, type of reviewers, affiliations) • outcomes/information gathered from the external review (e.g., summary of key findings) • description of how the information gathered was used to inform the guideline development process and/or formation of the recommendations (e.g., guideline panel considered results of review in forming final recommendations)

**Item 14 Updating Procedure: A procedure for updating the guideline is provided.**

**Instructions:**

Information on three aspects should be provided (add 2' for each aspect, 6' in total):

a) A statement that the guideline will be updated (2');

b) Explicit time interval or explicit criteria to guide decisions about when an update will occur (2');

c) Methodology for the updating procedure is reported (2')

*Related Report Criteria from User's Manual:* • a statement that the guideline will be updated • explicit

1  
2 time interval or explicit criteria to guide decisions about when an update will occur • methodology for the  
3 updating procedure is reported  
4

#### 5 **Domain 4 Clarity of Presentation**

##### 6 **Item 15 Specific and Unambiguous Recommendations: The recommendations are specific and** 7 **unambiguous.**

###### 8 Instructions:

9  
10 For each recommendation, information on four aspects should be provided. If only some of the  
11 recommendations report the following information, please first calculate the score based on the most  
12 informative recommendation (e.g., scored 5'), and then subtract 1' to get the final score (e.g., 5'-1'=4').  
13  
14

15  
16 For each recommendation, information on four aspects should be provided (add corresponding scores for  
17 each aspect, 6' in total):  
18

19 a) If a recommendation is uncertain, the uncertainty should be reflected in the recommendation and also be  
20 explicitly stated (2')

21 b) Identification of the intent or purpose of the recommended action (e.g., to improve quality of life, to  
22 decrease side effects, 2');  
23

24 - *Clarification:* If the benefit for uric acid lowering in patients with CVD is not clearly stated, the score for  
25 this aspect should not be added.

26 c) Identification of the relevant population (e.g., patients, public, 1');

27 d) Caveats or qualifying statements, if relevant (e.g., patients or conditions for whom the recommendations  
28 would not apply, 1').  
29

30 Note: if c) is not relevant, no score will be subtracted.  
31  
32

33 *Related Report Criteria from User's Manual:* • statement of the recommended action • identification of the  
34 intent or purpose of the recommended action (e.g., to improve quality of life, to decrease side effects) •  
35 identification of the relevant population (e.g., patients, public) • caveats or qualifying statements, if  
36 relevant (e.g., patients or conditions for whom the recommendations would not apply)  
37  
38

##### 39 **Item 16 Management Options: The different options for management of the condition or health issue** 40 **are clearly presented.**

###### 41 Instructions:

42 Information on two aspects should be provided (add 3' for each aspect, 6' in total):  
43

44 a) Description of options (3');

45 b) Description of population or clinical situation most appropriate to each option (3')

46 - *Note:* Please subtract 1' if only some options are provided with the most appropriate population or  
47 clinical situation.  
48  
49

50  
51 *Related Report Criteria from User's Manual:* • description of options • description of population or clinical  
52 situation most appropriate to each option  
53  
54

##### 55 **Item 17 Identifiable Key Recommendations: Key recommendations are easily identifiable.**

###### 56 Instructions:

57 Reporting style should follow two criteria (add 3' for each aspect, 6' in total):  
58

59 a) Description of recommendations in a summarized box, typed in bold, underlined, or presented as flow  
60 charts or algorithms (3');

b) Specific recommendations are grouped together in one section (3')

1  
2 - *Clarification*: If recommendations are summarised in the abstract, scores for aspect b) can also be given.  
3

4 Related *Report Criteria* from *User's Manual*: • description of recommendations in a summarized box,  
5 typed in bold, underlined, or presented as flow charts or algorithms • specific recommendations are  
6 grouped together in one section  
7  
8

## 9 **Domain 5 Applicability**

### 10 **Item 18 Facilitators and Barriers to Application: The guideline describes facilitators and barriers** 11 **to its application.**

#### 12 Instructions:

13 Information on four aspects should be provided (add corresponding scores for each aspect, 6' in total):

14 a) Identification of the types of facilitators and barriers that were considered (2');  
15

16 - *Clarification*: Statements of that certain drugs are not available in certain regions can be considered as  
17 identification of the facilitators and barriers.  
18

19 b) Methods by which information regarding the facilitators and barriers to implementing recommendations  
20 were sought (e.g., feedback from key stakeholders, pilot testing of guidelines before widespread  
21 implementation, 2');  
22

23 c) Information/description of the types of facilitators and barriers that emerged from the inquiry (e.g.,  
24 practitioners have the skills to deliver the recommended care, sufficient equipment is not available to  
25 ensure all eligible members of the population receive mammography, 1');  
26

27 d) Description of how the information influenced the guideline development process and/or formation of  
28 the recommendations (1')  
29

30  
31 Related *Report Criteria* from *User's Manual*: • identification of the types of facilitators and barriers that  
32 were considered • methods by which information regarding the facilitators and barriers to implementing  
33 recommendations were sought (e.g., feedback from key stakeholders, pilot testing of guidelines before  
34 widespread implementation) • information/description of the types of facilitators and barriers that emerged  
35 from the inquiry (e.g., practitioners have the skills to deliver the recommended care, sufficient equipment  
36 is not available to ensure all eligible members of the population receive mammography) • description of  
37 how the information influenced the guideline development process and/or formation of the  
38 recommendations  
39  
40  
41  
42

### 43 **Item 19 Implementation Advice or Tools: The guideline provides advice and/or tools on how the** 44 **recommendations can be put into practice.**

#### 45 Instructions:

46 Information on three aspects should be provided (add corresponding scores for each aspect, 6' in total):

47 a) An implementation section in the guideline (2');  
48

49 b) Tools and resources to facilitate application (add 1' for each tool/resource, maximum 2'): guideline  
50 summary documents, links to check lists/algorithms, links to how-to manuals, solutions linked to barrier  
51 analysis (see Item 18), tools to capitalize on guideline facilitators (see Item 18), outcome of pilot test and  
52 lessons learned;  
53

54 c) Directions on how users can access tools and resources (2')  
55  
56

57 Related *Report Criteria* from *User's Manual*: • an implementation section in the guideline • tools and  
58 resources to facilitate application: guideline summary documents, links to check lists/algorithms, links to  
59 how-to manuals, solutions linked to barrier analysis (see Item 18), tools to capitalize on guideline  
60 facilitators (see Item 18), outcome of pilot test and lessons learned • directions on how users can access

1  
2 tools and resources  
3

4 **Item 20 Resource Implications: The potential resource implications of applying the**  
5 **recommendations have been considered.**

6 - *Clarification:* The aim of this item is to the cost information considered by the guideline.

7 Instructions:

8 Information on four aspects should be provided (add corresponding scores for each aspect, 6' in total):

- 9  
10 a) Identification of the types of cost information that were considered (e.g., economic evaluations, drug  
11 acquisition costs, 2');  
12  
13 b) Methods by which the cost information was sought (e.g., a health economist was part of the guideline  
14 development panel, use of health technology assessments for specific drugs, etc., 2');  
15  
16 c) Information/description of the cost information that emerged from the inquiry (e.g., specific drug  
17 acquisition costs per treatment course, 1');  
18  
19 d) Description of how the information gathered was used to inform the guideline development process  
20 and/or formation of the recommendations (1')

21  
22  
23 Related *Report Criteria* from *User's Manual*: • identification of the types of cost information that were  
24 considered (e.g., economic evaluations, drug acquisition costs) • methods by which the cost information  
25 was sought (e.g., a health economist was part of the guideline development panel, use of health technology  
26 assessments for specific drugs, etc.) • information/description of the cost information that emerged from  
27 the inquiry (e.g., specific drug acquisition costs per treatment course) • description of how the information  
28 gathered was used to inform the guideline development process and/or formation of the recommendations  
29

30  
31 **Item 21 Monitoring or Auditing Criteria: The guideline presents monitoring and/or auditing criteria.**

32 - *Clarification:* The aim of this item is to evaluate the adherence to guidelines, but not to provide follow up  
33 parameters for diseases. *Monitoring* in this item refers to the action to monitor physicians' adherence to the  
34 guideline in daily practice by a group of investigators, but not to monitor the management of the disease in  
35 an individual patient. And the *auditing criteria* are the criteria to assess how well the guideline affects the  
36 practice in a region, but not how well the patients achieve the treatment target.  
37  
38  
39

40  
41 Instructions:

42 Information on four aspects should be provided (add corresponding scores for each aspect, 6' in total):

- 43 a) Identification of criteria to assess guideline implementation or adherence to recommendations (2');  
44  
45 b) Criteria for assessing impact of implementing the recommendations (2');  
46  
47 c) Advice on the frequency and interval of measurement (1');  
48  
49 d) Descriptions or operational definitions of how the criteria should be measured (1')

50 Related *Report Criteria* from *User's Manual*: • identification of criteria to assess guideline implementation  
51 or adherence to recommendations • criteria for assessing impact of implementing the recommendations •  
52 advice on the frequency and interval of measurement • descriptions or operational definitions of how the  
53 criteria should be measured  
54

55  
56 **Domain 6 Editorial Independence**

57 **Item 22 Funding Body: The views of the funding body have not influenced the content of the**  
58 **guideline.**

59 Instructions:

60 Information on two aspects should be provided (add 3' for each aspect, 6' in total):

- 1  
2 a) The name of the funding body or source of funding (or explicit statement of no funding, 3');  
3 b) A statement that the funding body did not influence the content of the guideline (3')  
4

5  
6 Related *Report Criteria* from *User's Manual*: • the name of the funding body or source of funding (or  
7 explicit statement of no funding) • a statement that the funding body did not influence the content of the  
8 guideline  
9

10  
11 **Item 23 Competing Interests: Competing interests of guideline development group members have**  
12 **been recorded and addressed.**

13 Instructions:

14 Information on four aspects should be provided (add corresponding scores for each aspect, 6' in total):

- 15 a) Description of the types of competing interests considered (2');  
16 b) Methods by which potential competing interests were sought (1');  
17 c) Description of the competing interests (1');  
18 d) Description of how the competing interests influenced the guideline process and development of  
19 recommendations (2')  
20  
21  
22

23  
24 Related *Report Criteria* from *User's Manual*: • description of the types of competing interests considered •  
25 methods by which potential competing interests were sought • description of the competing interests •  
26 description of how the competing interests influenced the guideline process and development of  
27 recommendations  
28  
29

30  
31 **Overall Guideline Assessment**

32 **Question 1 Overall quality: Rate the overall quality of this guideline.**

33 Instructions:

34 7' in total. Reviewer's impression on the overall quality of the guideline.  
35  
36  
37

38 **Question 2 Strength of recommendation: I would recommend this guideline for use.**

39 Instructions:

40 Three options to choose from: a) Yes; b) Yes, with modifications; c) No  
41 Reviewer's impression on whether the guideline is easy to be applied to clinical practice.  
42  
43

44 Related *Report Criteria* from *User's Manual*: The overall assessment requires the AGREE II user to make  
45 a judgment as to the quality of the guideline, taking into account the appraisal items considered in the  
46 assessment process.  
47  
48  
49  
50  
51  
52  
53  
54  
55  
56  
57  
58  
59  
60

## References

14. Khanna D, Fitzgerald JD, Khanna PP, Bae S, Singh MK, Neogi T, Pillinger MH, Merrill J, Lee S, Prakash S *et al*: **2012 American College of Rheumatology guidelines for management of gout. Part 1: systematic nonpharmacologic and pharmacologic therapeutic approaches to hyperuricemia.** *Arthritis care & research* 2012, **64**(10):1431-1446.
15. Khanna D, Khanna PP, Fitzgerald JD, Singh MK, Bae S, Neogi T, Pillinger MH, Merrill J, Lee S, Prakash S *et al*: **2012 American college of rheumatology guidelines for management of gout. part 2: Therapy and antiinflammatory prophylaxis of acute gouty arthritis.** *Arthritis Care and Research* 2012, **64**(10):1447-1461.
16. Richette P, Doherty M, Pascual E, Barskova V, Becce F, Castaneda-Sanabria J, Coyfish M, Guillo S, Jansen TL, Janssens H *et al*: **2016 updated EULAR evidence-based recommendations for the management of gout.** *Annals of the rheumatic diseases* 2016.
17. Hamburger M, Baraf HS, Adamson TC, 3rd, Basile J, Bass L, Cole B, Doghramji PP, Guadagnoli GA, Hamburger F, Harford R *et al*: **2011 Recommendations for the diagnosis and management of gout and hyperuricemia.** *Postgraduate medicine* 2011, **123**(6 Suppl 1):3-36.
18. Zhang W, Doherty M, Pascual E, Bardin T, Barskova V, Conaghan P, Gerster J, Jacobs J, Leeb B, Liote F *et al*: **EULAR evidence based recommendations for gout. Part I: Diagnosis. Report of a task force of the Standing Committee for International Clinical Studies Including Therapeutics (ESCSIT).** *Annals of the rheumatic diseases* 2006, **65**(10):1301-1311.
19. Qaseem A, McLean RM, Starkey M, Forciea MA: **Diagnosis of acute gout: a clinical practice guideline from the American College of Physicians.** *Annals of internal medicine* 2017, **166**(1):52-57.
20. Qaseem A, Harris RP, Forciea MA: **Management of acute and recurrent gout: a clinical practice guideline from the American College of Physicians.** *Annals of internal medicine* 2017, **166**(1):58-68.
21. Hui M, Carr A, Cameron S, Davenport G, Doherty M, Forrester H, Jenkins W, Jordan KM, Mallen CD, McDonald TM: **The British Society for Rheumatology guideline for the management of gout.** *Rheumatology* 2017, **56**(7):1056-1059.
22. Multi-disciplinary Expert Task Force on Hyperuricemia and Its Related Diseases. **Chinese multi-disciplinary consensus on the diagnosis and treatment of hyperuricemia and its related diseases.** *Chin J Intern Med.* 2017; **56**(3): 235-248 (Original document in Chinese).
28. Brouwers MC, Kho ME, Browman GP, Burgers JS, Cluzeau F, Feder G, Fervers B, Graham ID, Grimshaw J, Hanna SE: **AGREE II: advancing guideline development, reporting and evaluation in health care.** *Canadian Medical Association Journal* 2010, **182**(18):E839-E842.
36. Sivera F, Andres M, Carmona L, Kydd ASR, Moi J, Seth R, Sriranganathan M, Van Durme C, Van Echteld I, Vinik O *et al*: **Multinational evidence-based recommendations for the diagnosis and management of gout: Integrating systematic literature review and expert opinion of a broad panel of rheumatologists in the 3e initiative.** *Annals of the rheumatic diseases* 2014, **73**(2):328-335.
37. Chinese Society of Endocrinology. **Chinese consensus on the management of hyperuricemia and gout.** *Chin J Endocrinol Metab.* 2013; **29**(11): 913-920 (Original document in Chinese).
38. Association TR: **Taiwan guideline for the management of gout and hyperuricemia - updated 2016.** *Formosan Journal of Rheumatology* 2016, **30**:1-32.
39. Kiltz U, Smolen J, Bardin T, Cohen Solal A, Dalbeth N, Doherty M, Engel B, Flader C, Kay J, Matsuoka M *et al*: **Treat-to-target (T2T) recommendations for gout.** *Annals of the rheumatic diseases* 2016.
40. Araujo F, Cordeiro I, Teixeira F, Rovisco J, Ramiro S, Mourao AF, Costa JA, Pimentao JB, Malcata A, Santos MJ *et al*: **Portuguese recommendations for the diagnosis and management of gout.** *Acta reumatologica portuguesa* 2014, **39**(2):158-171.
41. Chinese Rheumatology Association. **2016 Chinese guideline on the diagnosis and management of**



- 1  
2 **gout**. *Chin J Intern Med*. 2016; **55**(11): 892-899 (Original document in Chinese).
- 3  
4 42. Neogi T, Jansen TLTA, Dalbeth N, Franssen J, Schumacher HR, Berendsen D, Brown M, Choi H,  
5 Edwards NL, Janssens HJEM *et al*: **2015 Gout classification criteria: An American College of**  
6 **Rheumatology/European League Against Rheumatism collaborative initiative**. *Annals of the*  
7 *rheumatic diseases* 2015, **74**(10):1789-1798.
- 8  
9 43. Graf SW, Whittle SL, Wechalekar MD, Moi JHY, Barrett C, Hill CL, Littlejohn G, Lynch N, Major G,  
10 Taylor AL *et al*: **Australian and New Zealand recommendations for the diagnosis and**  
11 **management of gout: Integrating systematic literature review and expert opinion in the 3e**  
12 **Initiative**. *International journal of rheumatic diseases* 2015, **18**(3):341-351.
- 13  
14 44. Federal Ministry of Health (Nigeria). **National nutritional guideline on non-communicable disease**  
15 **prevention, control and management**. Accessed at  
16 <http://www.health.gov.ng/doc/NutritionalGuideline.pdf> on 28 July 2017.
- 17  
18 45. Manara M, Bortoluzzi A, Favero M, Prevete I, Scire CA, Bianchi G, Borghi C, Cimmino MA, D'Avola  
19 GM, Desideri G *et al*: **Italian Society of Rheumatology recommendations for the management of**  
20 **gout**. *Reumatismo* 2013, **65**(1):4-21.
- 21  
22 46. Spanish Society of Rheumatology (SER). **Clinical practice guidelines for management of gout**.  
23 Accessed at [https://www.ser.es/wp-content/uploads/2015/09/GuipClinGot\\_1140226\\_EN.pdf](https://www.ser.es/wp-content/uploads/2015/09/GuipClinGot_1140226_EN.pdf) on 28 July  
24 2017.
- 25  
26 47. Hu D, Ding R: **The diagnosis and treatment advice of cardiovascular disease combined**  
27 **asymptomatic hyperuricemia (second edition)**. *Chinese Journal of Cardiovascular Research* 2012,  
28 **10**(4):241-249.
- 29  
30 48. Yamanaka H: **Japanese guideline for the management of hyperuricemia and gout: second edition**.  
31 *Nucleosides, nucleotides & nucleic acids* 2011, **30**(12):1018-1029.
- 32  
33 49. **Ministry of Health Malaysia (MOH). Management of gout**. Accessed at  
34 <http://www.moh.gov.my/penerbitan/CPG2017/3893.pdf> on 28 July 2017.
- 35  
36 50. Li-Yu J, Salido E, Manahan S, Lichauco J, Lorenzo J, Torralba K, Raso A, Roberto L, Santos EP,  
37 Maceda L: **Philippine clinical practice guidelines for the management of gout**. *International journal*  
38 *of rheumatic diseases* 2008, **11**:A362.
- 39  
40 51. Meyers OL, Cassim B, Mody GM: **Hyperuricaemia and gout: clinical guideline 2003**. *South African*  
41 *medical journal = Suid-Afrikaanse tydskrif vir geneeskunde* 2003, **93**(12 Pt 2):961-971.
- 42  
43 52. The University of Texas at Austin, School of Nursing, Family Nurse Practitioner Program.  
44 **Management of initial gout in adults**. Accessed at  
45 <http://www.alabmed.com/uploadfile/2014/0515/20140515070230703.pdf> on 25 July 2017.
- 46  
47 68. Wuthrich H, Alromaih F, So A: **Guidelines for the treatment of gout: a Swiss perspective**. *Swiss*  
48 *medical weekly* 2016, **146**:w14341.
- 49  
50 69. Ceriotti F, Fernandez-Calle P, Klee GG, Nordin G, Sandberg S, Streichert T, Vives-Corrans JL,  
51 Panteghini M: **Criteria for assigning laboratory measurands to models for analytical performance**  
52 **specifications defined in the 1st EFLM Strategic Conference**. *Clinical chemistry and laboratory*  
53 *medicine* 2016.
- 54  
55 70. Liote F: **New therapeutic approach to hyperuricemia and gout in the light of recommendations**.  
56 *Joint, bone, spine : revue du rhumatisme* 2016, **83**(4):376-380.
- 57  
58 71. de Lautour H, Taylor WJ, Adebajo A, Alten R, Burgos-Vargas R, Chapman P, Cimmino MA, da Rocha  
59 Castelar Pinheiro G, Day R, Harrold LR *et al*: **Development of Preliminary Remission Criteria for**  
60 **Gout Using Delphi and 1000Minds Consensus Exercises**. *Arthritis care & research* 2016,  
**68**(5):667-672.
72. De Lautour H, Dalbeth N, Taylor W: **Development of preliminary remission criteria for gout using**  
**Delphi and 1000 minds consensus exercises**. *Arthritis and Rheumatology* 2014, **66**:S68.

- 1  
2  
3  
4  
5  
6  
7  
8  
9  
10  
11  
12  
13  
14  
15  
16  
17  
18  
19  
20  
21  
22  
23  
24  
25  
26  
27  
28  
29  
30  
31  
32  
33  
34  
35  
36  
37  
38  
39  
40  
41  
42  
43  
44  
45  
46  
47  
48  
49  
50  
51  
52  
53  
54  
55  
56  
57  
58  
59  
60
73. Dalbeth N, Winnard D, Gow PJ, Boswell DR, Te Karu L, Lindsay K, Arroll B, Stamp LK: **Urate testing in gout: why, when and how.** *The New Zealand medical journal* 2015, **128**(1420):65-68.
74. Terslev L, Gutierrez M, Schmidt WA, Keen HI, Filippucci E, Kane D, Thiele R, Kaeley G, Balint P, Mandl P *et al*: **Ultrasound as an Outcome Measure in Gout. A Validation Process by the OMERACT Ultrasound Working Group.** *The Journal of rheumatology* 2015, **42**(11):2177-2181.
75. Turk C, Petrik A, Sarica K, Seitz C, Skolarikos A, Straub M, Knoll T: **EAU Guidelines on Diagnosis and Conservative Management of Urolithiasis.** *European urology* 2016, **69**(3):468-474.
76. Stewart Coats AJ, Shewan LG: **Consensus Meeting on "Uric Acid and Cardiovascular Risk" held at University Magna Graecia, Catanzaro, Italy, May 2014. Publication of the Proceedings as a special issue in the International Journal of Cardiology.** *International journal of cardiology* 2016, **213**:1-3.
77. Sullivan PM, William A, Tichy EM: **Hyperuricemia and gout in solid-organ transplant: update in pharmacological management.** *Progress in transplantation (Aliso Viejo, Calif)* 2015, **25**(3):263-270.
78. Gutierrez M, Schmidt WA, Thiele RG, Keen HI, Kaeley GS, Naredo E, Iagnocco A, Bruyn GA, Balint PV, Filippucci E *et al*: **International Consensus for ultrasound lesions in gout: results of Delphi process and web-reliability exercise.** *Rheumatology (Oxford, England)* 2015, **54**(10):1797-1805.
79. Grainger R, Dalbeth N, Keen H, Durcan L, Lawrence Edwards N, Perez-Ruiz F, Diaz-Torne C, Singh JA, Khanna D, Simon LS *et al*: **Imaging as an Outcome Measure in Gout Studies: Report from the OMERACT Gout Working Group.** *The Journal of rheumatology* 2015, **42**(12):2460-2464.
80. Robinson PC, Dalbeth N: **Advances in pharmacotherapy for the treatment of gout.** *Expert opinion on pharmacotherapy* 2015, **16**(4):533-546.
81. Chaudhary K, Malhotra K, Sowers J, Aroor A: **Uric Acid - key ingredient in the recipe for cardiorenal metabolic syndrome.** *Cardiorenal medicine* 2013, **3**(3):208-220.
82. Bakris GL, Doghramji PP, Keenan RT, Silber SH: **CaseBook challenges: Managing gout, hyperuricemia and comorbidities -- dialogue with the experts.** *The American journal of medicine* 2014, **127**(1):S1.
83. Terkeltaub R: **Gout: multinational gout guidelines: how do we move beyond 'deja vu'?** *Nature reviews Rheumatology* 2013, **9**(10):567-569.
84. Lyseng-Williamson KA: **Canakinumab: a guide to its use in acute gouty arthritis flares.** *BioDrugs : clinical immunotherapeutics, biopharmaceuticals and gene therapy* 2013, **27**(4):401-406.
85. Deodhar A: **Update in rheumatology: evidence published in 2012.** *Annals of internal medicine* 2013, **158**(12):903-906.
86. Simao AN, Lozovoy MA, Dichi I: **The uric acid metabolism pathway as a therapeutic target in hyperuricemia related to metabolic syndrome.** *Expert opinion on therapeutic targets* 2012, **16**(12):1175-1187.
87. Stamp LK, Jordan S: **The challenges of gout management in the elderly.** *Drugs & aging* 2011, **28**(8):591-603.
88. Jansen TL, Richette P, Perez-Ruiz F, Tausche AK, Guerne PA, Punzi L, Leeb B, Barskova V, Uhlig T, Pimentao J *et al*: **International position paper on febuxostat.** *Clinical rheumatology* 2010, **29**(8):835-840.
89. Grainger R, Taylor WJ, Dalbeth N, Perez-Ruiz F, Singh JA, Waltrip RW, Schlesinger N, Evans R, Edwards NL, Sivera F *et al*: **Progress in measurement instruments for acute and chronic gout studies.** *The Journal of rheumatology* 2009, **36**(10):2346-2355.
90. Grainger R, Taylor WJ: **Establishing outcome domains for evaluating treatment of acute and chronic gout.** *Current opinion in rheumatology* 2008, **20**(2):173-178.
91. Dalbeth N, Stamp L: **Allopurinol dosing in renal impairment: walking the tightrope between adequate urate lowering and adverse events.** *Seminars in dialysis* 2007, **20**(5):391-395.

- 1  
2  
3  
4  
5  
6  
7  
8  
9  
10  
11  
12  
13  
14  
15  
16  
17  
18  
19  
20  
21  
22  
23  
24  
25  
26  
27  
28  
29  
30  
31  
32  
33  
34  
35  
36  
37  
38  
39  
40  
41  
42  
43  
44  
45  
46  
47  
48  
49  
50  
51  
52  
53  
54  
55  
56  
57  
58  
59  
60
92. Jordan KM, Cameron JS, Snaith M, Zhang W, Doherty M, Seckl J, Hingorani A, Jaques R, Nuki G: **British Society for Rheumatology and British Health Professionals in Rheumatology guideline for the management of gout.** *Rheumatology (Oxford, England)* 2007, **46**(8):1372-1374.
93. Becker G: **The CARI guidelines. Kidney stones: uric acid stones.** *Nephrology (Carlton, Vic)* 2007, **12 Suppl 1**:S21-25.
94. Caramia G, Di Gregorio L, Tarantino ML, Galuffo A, Iacolino R, Caramia M: **Uric acid, phosphate and oxalate stones: treatment and prophylaxis.** *Urologia internationalis* 2004, **72 Suppl 1**:24-28.
95. Terkeltaub RA: **Clinical practice. Gout.** *The New England journal of medicine* 2003, **349**(17):1647-1655.
96. Cleland LG, Hill CL, James MJ: **Diet and arthritis.** *Bailliere's clinical rheumatology* 1995, **9**(4):771-785.
97. Hande KR, Noone RM, Stone WJ: **Severe allopurinol toxicity. Description and guidelines for prevention in patients with renal insufficiency.** *The American journal of medicine* 1984, **76**(1):47-56.
98. **Committee on the Review of Medicines. Recommendations on phenylbutazone, oxyphenbutazone, feprazone, allopurinol, colchicine, probenecid, and sulphinpyrazone.** *British medical journal* 1978, **1**(6125):1466-1467.
99. Mourgues C, Soubrier M, Pereira B, Vorilhon P, Mathieu S: **2012 American guidelines for the management of gout as seen by family doctors in France.** *Annals of the rheumatic diseases* 2016, **75**:1187.
100. Bakris GL, Doghramji PP, Keenan RT, Silber SH: **CaseBook Challenges: Managing Gout, Hyperuricemia and Comorbidities-Dialogue with the Experts.** *American Journal of Medicine* 1970, **127**(1):S1.
101. Pai S, Raslan A, Schlesinger N: **Gout: Update on Current Therapeutics.** *Current Treatment Options in Rheumatology* 2015, **1**(2):131-142.
102. Vargas-Santos AB, Taylor WJ, Neogi T: **Gout Classification Criteria: Update and Implications.** *Current rheumatology reports* 2016, **18 (7) (no pagination)**(46).
103. Filiopoulos V, Hadjiyannakos D, Vlassopoulos D: **Febuxostat renoprotection in CKD patients with asymptomatic hyperuricemia.** *American Journal of Kidney Diseases* 2016, **67**(6):989-990.
104. Chinchilla SP, Urionaguena I, Perez-Ruiz F: **Febuxostat for the chronic management of hyperuricemia in patients with gout.** *Expert Review of Clinical Pharmacology* 2016, **9**(5):665-673.
105. Rimler E, Lom J, Higdon J, Cosco D, Jones D: **A primary care perspective on gout.** *Open Urology and Nephrology Journal* 2016, **9**(Suppl 1: M5):27-34.
106. Saito Y, Stamp LK, Caudle KE, Hershfield MS, McDonagh EM, Callaghan JT, Tassaneeyakul W, Mushiroda T, Kamatani N, Goldspiel BR *et al*: **CPIC: Clinical Pharmacogenetics Implementation Consortium of the Pharmacogenomics Research Network.** *Clinical pharmacology and therapeutics* 2016, **99**(1):36-37.
107. Mody GM: **Update on hyperuricaemia and gout with evidence based management guidelines.** *South African Family Practice* 2015, **57**(4):267-272.
108. Richette P, Pascual E, Doherty M, Barskova V, Becce F, Coyfish M, Janssens H, Jansen T, Liote F, Mallen C *et al*: **Updated EULAR evidence-based recommendations for the diagnosis of gout.** *Annals of the Rheumatic Diseases Conference: Annual European Congress of Rheumatology of the European League Against Rheumatism, EULAR* 2014, **73**(no pagination).
109. Richette P, Doherty M, Pascual E, Barskova V, Becce F, Coyfish M, Janssens H, Jansen T, Liote F, Mallen C *et al*: **Updated EULAR evidence-based recommendations for the management of gout.** *Annals of the Rheumatic Diseases Conference: Annual European Congress of Rheumatology of the European League Against Rheumatism, EULAR* 2014, **73**(no pagination).
110. Gutierrez M, Smith W, Thiele R, Keen H, Kaeley G, Naredo E, Iagnocco A, Bruyn G, Balint P,

- 1  
2  
3  
4  
5  
6  
7  
8  
9  
10  
11  
12  
13  
14  
15  
16  
17  
18  
19  
20  
21  
22  
23  
24  
25  
26  
27  
28  
29  
30  
31  
32  
33  
34  
35  
36  
37  
38  
39  
40  
41  
42  
43  
44  
45  
46  
47  
48  
49  
50  
51  
52  
53  
54  
55  
56  
57  
58  
59  
60
- Filippucci E *et al*: **Defining elementary ultrasound lesions in gout. Preliminary results of delphi consensus and web-exercise reliability.** *Annals of the Rheumatic Diseases Conference: Annual European Congress of Rheumatology of the European League Against Rheumatism, EULAR 2014*, **73**(no pagination).
111. Furst DE, Keystone EC, So AK, Braun J, Breedveld FC, Burmester GR, De Benedetti F, Dorner T, Emery P, Fleischmann R *et al*: **Updated consensus statement on biological agents for the treatment of rheumatic diseases, 2012.** *Annals of the rheumatic diseases* 2013, **72**(SUPPL. 2):ii2-ii34.
112. Hershfield MS, Callaghan JT, Tassaneeyakul W, Mushiroda T, Thorn CF, Klein TE, Lee MTM: **Clinical pharmacogenetics implementation consortium guidelines for human leukocyte antigen-b genotype and allopurinol dosing.** *Clinical pharmacology and therapeutics* 2013, **93**(2):153-158.
113. Andres M, Sivera F, Kydd A, Moi J, Seth R, Sriranganathan MK, Van Durme C, Van Echteld IAAM, Vinik O, Wechalekar MD *et al*: **Multinational evidence-based recommendations for diagnosis and management of gout: Integrating systematic literature research and expert opinion of a broad panel of rheumatologists in the 3E initiative.** *Arthritis and rheumatism* 2012, **64**:S810.
114. Stevenson M, Pandor A: **Febuxostat for the management of hyperuricaemia in patients with gout: A nice single technology appraisal.** *PharmacoEconomics* 2011, **29**(2):133-140.
115. Diaz-Borjon A: **Guidelines for the use of conventional and newer disease-modifying antirheumatic drugs in elderly patients with rheumatoid arthritis.** *Drugs and Aging* 2009, **26**(4):273-293.
116. Furst DE, Keystone EC, Fleischmann R, Mease P, Breedveld FC, Smolen JS, Kalden JR, Braun J, Bresnihan B, Burmester GR *et al*: **Updated consensus statement on biological agents for the treatment of rheumatic diseases, 2009.** *Annals of the rheumatic diseases* 2010, **69**(SUPPL. 1):i2-i29.
117. Taylor WJ, Shewchuk R, Saag KG, Schumacher Jr HR, Singh JA, Grainger R, Edwards NL, Bardin T, Waltrip RW, Simon LS *et al*: **Toward a Valid Definition of Gout Flare: Results of Consensus Exercises Using Delphi Methodology and Cognitive Mapping.** *Arthritis Care and Research* 2009, **61**(4):535-543.
118. Taylor WJ, Schumacher Jr HR, Baraf HSB, Chapman P, Stamp L, Doherty M, McQueen F, Dalbeth N, Schlesinger N, Furst DE *et al*: **A modified Delphi exercise to determine the extent of consensus with OMERACT outcome domains for studies of acute and chronic gout.** *Annals of the rheumatic diseases* 2008, **67**(6):888-891.
119. Bussieres AE, Peterson C, Taylor JAM: **Diagnostic Imaging Guideline for Musculoskeletal Complaints in Adults-An Evidence-Based Approach-Part 2: Upper Extremity Disorders.** *Journal of Manipulative and Physiological Therapeutics* 2008, **31**(1):2-32.
120. Brooks P, Boers M, Simon LS, Strand V, Tugwell P: **Outcome measures in rheumatoid arthritis: The OMERACT process.** *Expert Review of Clinical Immunology* 2007, **3**(3):271-275.
121. Bestermann W, Houston MC, Basile J, Egan B, Ferrario CM, Lackland D, Hawkins RG, Reed J, Rogers P, Wise D *et al*: **Addressing the global cardiovascular risk of hypertension, dyslipidemia, diabetes mellitus, and the metabolic syndrome in the Southeastern United States, part II: Treatment recommendations for management of the global cardiovascular risk of hypertension, dyslipidemia, diabetes mellitus, and the metabolic syndrome.** *American Journal of the Medical Sciences* 2005, **329**(6):292-305.
122. Schumacher Jr HR: **Management strategies for osteoarthritis, ankylosing spondylitis, and gouty arthritis.** *Journal of Clinical Rheumatology* 2004, **10**(3 SUPPL.):S18-S25.
123. Bartlett JG: **Guidelines section.** *Infectious Diseases in Clinical Practice* 2002, **11**(8):467-471.
124. Furst DE, Keystone EC, So AK, Braun J, Breedveld FC, Burmester GR, De Benedetti F, Dörner T, Emery P, Fleischmann R: **Updated consensus statement on biological agents for the treatment of rheumatic diseases, 2012.** *Annals of the rheumatic diseases* 2013, **72**(suppl 2):ii2-ii34.
125. Newberry SJ, FitzGerald JD, Motala A, Booth M, Maglione MA, Han D, Tariq A, O'hanlon CE,

- 1 Shanman R, Dudley W: **Diagnosis of gout: a systematic review in support of an American College**  
2 **of Physicians clinical practice guideline.** *Annals of internal medicine* 2017, **166**(1):27-36.
- 3  
4 126. Shekelle PG, Newberry SJ, FitzGerald JD, Motala A, O'hanlon CE, Tariq A, Okunogbe A, Han D,  
5 Shanman R: **Management of gout: a systematic review in support of an American College of**  
6 **Physicians clinical practice guideline.** *Annals of internal medicine* 2017, **166**(1):37-51.
- 7  
8 127. Sandberg S, Fraser CG, Horvath AR, Jansen R, Jones G, Oosterhuis W, Petersen PH, Schimmel H,  
9 Sikaris K, Panteghini M: **Defining analytical performance specifications: consensus statement**  
10 **from the 1st Strategic Conference of the European Federation of Clinical Chemistry and**  
11 **Laboratory Medicine.** *Clinical Chemistry and Laboratory Medicine (CCLM)* 2015, **53**(6):833-835.
- 12  
13 128. Kallinich T, Haffner D, Niehues T, Huss K, Lainka E, Neudorf U, Schaefer C, Stojanov S, Timmann C,  
14 Keitzer R: **Colchicine use in children and adolescents with familial Mediterranean fever:**  
15 **literature review and consensus statement.** *Pediatrics* 2007, **119**(2):e474-e483.
- 16  
17 129. Preminger GM, Tiselius H-G, Assimos DG, Alken P, Buck C, Gallucci M, Knoll T, Lingeman JE,  
18 Nakada SY, Pearle MS: **2007 guideline for the management of ureteral calculi.** *The Journal of*  
19 *urology* 2007, **178**(6):2418-2434.
- 20  
21 130. National Institute for Health and Care Excellence (NICE). **Febuxostat for the management of**  
22 **hyperuricaemia in people with gout.** Assessed at nice.org.uk/guidance/ta164 on 25 July 2017.
- 23  
24 131. Phoon, R and Johnson, D. **Medical therapies to reduce chronic kidney disease progression and**  
25 **cardiovascular risk: uric acid-lowering agents.** Accessed at  
26 [http://www.cari.org.au/CKD/CKD%20early/Medical\\_Th\\_Uric\\_Acid-lowering.pdf](http://www.cari.org.au/CKD/CKD%20early/Medical_Th_Uric_Acid-lowering.pdf) on 23 July 2017.
- 27  
28 132. Li Q, Yu P: **The diagnosis and treatment of gout.** *Int J Endocrinol Metab* 2011, **31**(5):289-291.
- 29  
30 133. zhang X, Zhang Z: **Advice for the diagnosis and treatment for gout.** *Chin J Rheumatol* 2013,  
31 **17**(8):631.
- 32  
33 134. Deng X, Zhang Z: **OMERACT Ultrasound Gout Task Force group released the international**  
34 **consensus for ultrasound lesions in gout.** *Chin J Rheumatol* 2016, **20**(3):216.
- 35  
36 135. Chinese Rheumatology Association (CRA). **Guideline for the diagnosis and tretment for primary**  
37 **gout (draft).** *Chin J Rheumatol.* 2004:8(3): 178-181 (Original document in Chinese).
- 38  
39 136. Chinese College of Cardiovascular Physicians (CCCP). **The diagnosis and treatment advice of**  
40 **cardiovascular disease combined asymptomatic hyperuricemia (second edition).** Accessed at  
41 <http://www.alabmed.com/uploadfile/2014/0121/20140121022919976.pdf> on 20 July 2017 (Original  
42 document in Chinese).
- 43  
44 137. Chinese Rheumatology Association (CRA). **Guideline for the diagnosis and tretment for primary**  
45 **gout (draft).** *Chin J Rheumatol.* 2011:15(6): 410-413 (Original document in Chinese).
- 46  
47 138. World Health Organization (WHO). **Standard treatment guidelines and essential drugs list for**  
48 **South Africa.** Accessed at <http://apps.who.int/medicinedocs/documents/s18259en/s18259en.pdf> on 23  
49 July 2017.
- 50  
51 139. European Medicines Agency (EMA). **Concept paper on the need of the guideline on clinical**  
52 **investigation of medicinal products for the treatment of gout.** Accessed at  
53 [http://www.ema.europa.eu/docs/en\\_GB/document\\_library/Scientific\\_guideline/2012/06/WC500128670](http://www.ema.europa.eu/docs/en_GB/document_library/Scientific_guideline/2012/06/WC500128670.pdf)  
54 .pdf on 23 July 2017.
- 55  
56 140. Agency for Healthcare Research and Quality (AHRQ). **Diagnosis and Management of Gout:**  
57 **Current State of the Evidence.** Accessed at  
58 [https://effectivehealthcare.ahrq.gov/sites/default/files/pdf/gout\\_clinician.pdf](https://effectivehealthcare.ahrq.gov/sites/default/files/pdf/gout_clinician.pdf) on 25 July 2017.
- 59  
60 141. Agency for Healthcare Research and Quality (AHRQ). **Diagnosis of Gout.** Accessed at  
61 [https://effectivehealthcare.ahrq.gov/sites/default/files/pdf/gout\\_research-2016.pdf](https://effectivehealthcare.ahrq.gov/sites/default/files/pdf/gout_research-2016.pdf) on 25 July 2017.
- 62  
63 142. National Institute for Health and Care Excellence (NICE). **Pegloticase for treating severe debilitating**  
64 **chronic tophaceous gout.** Assessed at nice.org.uk/guidance/ta291 on 25 July 2017.

- 1  
2  
3  
4  
5  
6  
7  
8  
9  
10  
11  
12  
13  
14  
15  
16  
17  
18  
19  
20  
21  
22  
23  
24  
25  
26  
27  
28  
29  
30  
31  
32  
33  
34  
35  
36  
37  
38  
39  
40  
41  
42  
43  
44  
45  
46  
47  
48  
49  
50  
51  
52  
53  
54  
55  
56  
57  
58  
59  
60
143. Agency for Healthcare Research and Quality (AHRQ). **Diagnosis of gout**. Assessed at [www.effectivehealthcare.ahrq.gov/reports/fnal.cfm](http://www.effectivehealthcare.ahrq.gov/reports/fnal.cfm) on 25 July 2017.
144. Buckinghamshire Formulary, National Health Service (NHS). **781FM.1 Febuxostat**. Accessed at [http://www.bucksformulary.nhs.uk/docs/Guideline\\_781FM.pdf](http://www.bucksformulary.nhs.uk/docs/Guideline_781FM.pdf) on 25 July 2017.
145. Canadian Expert Drug Advisory Committee (CEDAC). **Febuxostat**. Accessed at [https://www.cadth.ca/media/cdr/complete/cdr\\_complete\\_Uloric\\_April-29-11.pdf](https://www.cadth.ca/media/cdr/complete/cdr_complete_Uloric_April-29-11.pdf) on 25 July 2017.
146. Dalhousie CME Academic Detailing Service. **Gout: Update 2013**. Accessed at [https://cdn.dal.ca/content/dam/dalhousie/pdf/faculty/medicine/departments/core-units/cpd/academic-detailing/Gout\\_workbook.pdf](https://cdn.dal.ca/content/dam/dalhousie/pdf/faculty/medicine/departments/core-units/cpd/academic-detailing/Gout_workbook.pdf) on 23 July 2017.
147. Lancashire Medicines Management Group, National Health Service (NHS). **Gout Management Summary Guidelines (Version 1.1)**. Accessed at [http://www.lancsmmg.nhs.uk/download/guidelines/Gout%20Prescribing%20Guidance%20\(Versio%201.1\).pdf](http://www.lancsmmg.nhs.uk/download/guidelines/Gout%20Prescribing%20Guidance%20(Versio%201.1).pdf) on 25 July 2017.



# PRISMA 2009 Checklist

| Section/topic                      | #  | Checklist item                                                                                                                                                                                                                                                                                              | Reported on page # |
|------------------------------------|----|-------------------------------------------------------------------------------------------------------------------------------------------------------------------------------------------------------------------------------------------------------------------------------------------------------------|--------------------|
| <b>TITLE</b>                       |    |                                                                                                                                                                                                                                                                                                             |                    |
| Title                              | 1  | Identify the report as a systematic review, meta-analysis, or both.                                                                                                                                                                                                                                         | 1                  |
| <b>ABSTRACT</b>                    |    |                                                                                                                                                                                                                                                                                                             |                    |
| Structured summary                 | 2  | Provide a structured summary including, as applicable: background; objectives; data sources; study eligibility criteria, participants, and interventions; study appraisal and synthesis methods; results; limitations; conclusions and implications of key findings; systematic review registration number. | 3-4                |
| <b>INTRODUCTION</b>                |    |                                                                                                                                                                                                                                                                                                             |                    |
| Rationale                          | 3  | Describe the rationale for the review in the context of what is already known.                                                                                                                                                                                                                              | 6-7                |
| Objectives                         | 4  | Provide an explicit statement of questions being addressed with reference to participants, interventions, comparisons, outcomes, and study design (PICOS).                                                                                                                                                  | 7                  |
| <b>METHODS</b>                     |    |                                                                                                                                                                                                                                                                                                             |                    |
| Protocol and registration          | 5  | Indicate if a review protocol exists, if and where it can be accessed (e.g., Web address), and, if available, provide registration information including registration number.                                                                                                                               | 7                  |
| Eligibility criteria               | 6  | Specify study characteristics (e.g., PICOS, length of follow-up) and report characteristics (e.g., years considered, language, publication status) used as criteria for eligibility, giving rationale.                                                                                                      | 8                  |
| Information sources                | 7  | Describe all information sources (e.g., databases with dates of coverage, contact with study authors to identify additional studies) in the search and date last searched.                                                                                                                                  | 7                  |
| Search                             | 8  | Present full electronic search strategy for at least one database, including any limits used, such that it could be repeated.                                                                                                                                                                               | 7                  |
| Study selection                    | 9  | State the process for selecting studies (i.e., screening, eligibility, included in systematic review, and, if applicable, included in the meta-analysis).                                                                                                                                                   | 8                  |
| Data collection process            | 10 | Describe method of data extraction from reports (e.g., piloted forms, independently, in duplicate) and any processes for obtaining and confirming data from investigators.                                                                                                                                  | 8                  |
| Data items                         | 11 | List and define all variables for which data were sought (e.g., PICOS, funding sources) and any assumptions and simplifications made.                                                                                                                                                                       | 8                  |
| Risk of bias in individual studies | 12 | Describe methods used for assessing risk of bias of individual studies (including specification of whether this was done at the study or outcome level), and how this information is to be used in any data synthesis.                                                                                      | 8-9                |
| Summary measures                   | 13 | State the principal summary measures (e.g., risk ratio, difference in means).                                                                                                                                                                                                                               | 8-9                |
| Synthesis of results               | 14 | Describe the methods of handling data and combining results of studies, if done, including measures of consistency (e.g., $I^2$ ) for each meta-analysis.                                                                                                                                                   | 8-9                |



# PRISMA 2009 Checklist

Page 1 of 2

| Section/topic                 | #  | Checklist item                                                                                                                                                                                           | Reported -on page # |
|-------------------------------|----|----------------------------------------------------------------------------------------------------------------------------------------------------------------------------------------------------------|---------------------|
| Risk of bias across studies   | 15 | Specify any assessment of risk of bias that may affect the cumulative evidence (e.g., publication bias, selective reporting within studies).                                                             | 8-9                 |
| Additional analyses           | 16 | Describe methods of additional analyses (e.g., sensitivity or subgroup analyses, meta-regression), if done, indicating which were pre-specified.                                                         | 8-9                 |
| <b>RESULTS</b>                |    |                                                                                                                                                                                                          |                     |
| Study selection               | 17 | Give numbers of studies screened, assessed for eligibility, and included in the review, with reasons for exclusions at each stage, ideally with a flow diagram.                                          | 9                   |
| Study characteristics         | 18 | For each study, present characteristics for which data were extracted (e.g., study size, PICOS, follow-up period) and provide the citations.                                                             | 10                  |
| Risk of bias within studies   | 19 | Present data on risk of bias of each study and, if available, any outcome level assessment (see item 12).                                                                                                | 10-12               |
| Results of individual studies | 20 | For all outcomes considered (benefits or harms), present, for each study: (a) simple summary data for each intervention group (b) effect estimates and confidence intervals, ideally with a forest plot. | 12-16               |
| Synthesis of results          | 21 | Present results of each meta-analysis done, including confidence intervals and measures of consistency.                                                                                                  | 12-16               |
| Risk of bias across studies   | 22 | Present results of any assessment of risk of bias across studies (see Item 15).                                                                                                                          | 12                  |
| Additional analysis           | 23 | Give results of additional analyses, if done (e.g., sensitivity or subgroup analyses, meta-regression [see Item 16]).                                                                                    | 11                  |
| <b>DISCUSSION</b>             |    |                                                                                                                                                                                                          |                     |
| Summary of evidence           | 24 | Summarize the main findings including the strength of evidence for each main outcome; consider their relevance to key groups (e.g., healthcare providers, users, and policy makers).                     | 16                  |
| Limitations                   | 25 | Discuss limitations at study and outcome level (e.g., risk of bias), and at review-level (e.g., incomplete retrieval of identified research, reporting bias).                                            | 19-20               |
| Conclusions                   | 26 | Provide a general interpretation of the results in the context of other evidence, and implications for future research.                                                                                  | 20-21               |
| <b>FUNDING</b>                |    |                                                                                                                                                                                                          |                     |
| Funding                       | 27 | Describe sources of funding for the systematic review and other support (e.g., supply of data); role of funders for the systematic review.                                                               | 21-22               |

From: Moher D, Liberati A, Tetzlaff J, Altman DG, The PRISMA Group (2009). Preferred Reporting Items for Systematic Reviews and Meta-Analyses: The PRISMA Statement. PLoS Med 6(7): e1000097. doi:10.1371/journal.pmed1000097

For more information, visit: [www.prisma-statement.org](http://www.prisma-statement.org).



# BMJ Open

## Diagnosis and treatment for hyperuricemia and gout: a systematic review of clinical practice guidelines and consensus statements

|                                 |                                                                                                                                                                                                                                                                                                                                                                                                                                                                                                                                                                                                                                                                                                                                                                                                                                                                                                                                                                                                                                                                                                                                                                                                                                                                                                                                                                                                                                                                                                                                                                   |
|---------------------------------|-------------------------------------------------------------------------------------------------------------------------------------------------------------------------------------------------------------------------------------------------------------------------------------------------------------------------------------------------------------------------------------------------------------------------------------------------------------------------------------------------------------------------------------------------------------------------------------------------------------------------------------------------------------------------------------------------------------------------------------------------------------------------------------------------------------------------------------------------------------------------------------------------------------------------------------------------------------------------------------------------------------------------------------------------------------------------------------------------------------------------------------------------------------------------------------------------------------------------------------------------------------------------------------------------------------------------------------------------------------------------------------------------------------------------------------------------------------------------------------------------------------------------------------------------------------------|
| Journal:                        | <i>BMJ Open</i>                                                                                                                                                                                                                                                                                                                                                                                                                                                                                                                                                                                                                                                                                                                                                                                                                                                                                                                                                                                                                                                                                                                                                                                                                                                                                                                                                                                                                                                                                                                                                   |
| Manuscript ID                   | bmjopen-2018-026677.R3                                                                                                                                                                                                                                                                                                                                                                                                                                                                                                                                                                                                                                                                                                                                                                                                                                                                                                                                                                                                                                                                                                                                                                                                                                                                                                                                                                                                                                                                                                                                            |
| Article Type:                   | Research                                                                                                                                                                                                                                                                                                                                                                                                                                                                                                                                                                                                                                                                                                                                                                                                                                                                                                                                                                                                                                                                                                                                                                                                                                                                                                                                                                                                                                                                                                                                                          |
| Date Submitted by the Author:   | 19-Jul-2019                                                                                                                                                                                                                                                                                                                                                                                                                                                                                                                                                                                                                                                                                                                                                                                                                                                                                                                                                                                                                                                                                                                                                                                                                                                                                                                                                                                                                                                                                                                                                       |
| Complete List of Authors:       | <p>Li, Qianrui; Sichuan University West China Hospital, Department of Endocrinology and Metabolism</p> <p>Li, Xiaodan; Sichuan University West China Hospital, Department of Gastroenterology</p> <p>Wang, Jing; Sichuan University West China Hospital, Department of Oto-Rhino-Laryngology</p> <p>Liu, Hongdie; Sichuan University West China Hospital, Department of Endocrinology and Metabolism</p> <p>Kwong, Joey; Prince of Wales Hospital, The Chinese University of Hong Kong, Jockey Club School of Public Health and Primary Care</p> <p>Chen, Hao; Nanjing University of Chinese Medicine, The second clinical college</p> <p>Li, Ling; West China Hospital, Sichuan University, Chinese Evidence-based Medicine Center</p> <p>Chung, Sheng-Chia; The Farr Institute of Health Informatics Research and Institute of Health Informatics, University College London</p> <p>Shah, Anoop; University College London, Farr Institute of Health Informatics Research</p> <p>Chen, Yaolong; School of Basic Medical Sciences, Lanzhou University, Evidence-Based Medicine Center</p> <p>An, Zhenmei; Sichuan University West China Hospital, Department of Endocrinology and Metabolism</p> <p>Sun, Xin; West China Hospital, Sichuan University, Chinese Evidence-based Medicine Center</p> <p>Hemingway, Harry; UCL, Epidemiology and Public Health</p> <p>Tian, Hao-Ming; Department of Endocrinology, West China Hospital, Sichuan University</p> <p>Li, Sheyu; Department of Endocrinology and Metabolism, West China Hospital, Sichuan University</p> |
| <b>Primary Subject Heading</b>: | Diabetes and endocrinology                                                                                                                                                                                                                                                                                                                                                                                                                                                                                                                                                                                                                                                                                                                                                                                                                                                                                                                                                                                                                                                                                                                                                                                                                                                                                                                                                                                                                                                                                                                                        |
| Secondary Subject Heading:      | Diabetes and endocrinology                                                                                                                                                                                                                                                                                                                                                                                                                                                                                                                                                                                                                                                                                                                                                                                                                                                                                                                                                                                                                                                                                                                                                                                                                                                                                                                                                                                                                                                                                                                                        |
| Keywords:                       | Clinical practice guideline, Hyperuricemia, Gout, Systematic review                                                                                                                                                                                                                                                                                                                                                                                                                                                                                                                                                                                                                                                                                                                                                                                                                                                                                                                                                                                                                                                                                                                                                                                                                                                                                                                                                                                                                                                                                               |
|                                 |                                                                                                                                                                                                                                                                                                                                                                                                                                                                                                                                                                                                                                                                                                                                                                                                                                                                                                                                                                                                                                                                                                                                                                                                                                                                                                                                                                                                                                                                                                                                                                   |

1  
2  
3  
4  
5  
6  
7  
8  
9  
10  
11  
12  
13  
14  
15  
16  
17  
18  
19  
20  
21  
22  
23  
24  
25  
26  
27  
28  
29  
30  
31  
32  
33  
34  
35  
36  
37  
38  
39  
40  
41  
42  
43  
44  
45  
46  
47  
48  
49  
50  
51  
52  
53  
54  
55  
56  
57  
58  
59  
60



1  
2  
3  
4 **Diagnosis and treatment for hyperuricemia and gout: a systematic**  
5 **review of clinical practice guidelines and consensus statements**  
6  
7  
8

9 **Running title:** AGREE II assessment for hyperuricemia and gout guidelines  
10  
11

12  
13 Qianrui Li<sup>1,2#</sup>, Xiaodan Li<sup>3#</sup>, Jing Wang<sup>4</sup>, Hongdie Liu<sup>1</sup>, Joey Sum-Wing  
14 Kwong<sup>5</sup>, Hao Chen<sup>6</sup>, Ling Li<sup>7</sup>, Sheng-Chia Chung<sup>2</sup>, Anoop Dinesh Shah<sup>2,8,9,10</sup>,  
15 Yaolong Chen<sup>11</sup>, Zhenmei An<sup>1</sup>, Xin Sun<sup>7</sup>, Harry Hemingway<sup>2,9,10</sup>, Haoming  
16 Tian<sup>1\*</sup>, Sheyu Li<sup>1,12\*</sup>  
17  
18  
19  
20  
21  
22

23 1 Department of Endocrinology and Metabolism, West China Hospital,  
24 Sichuan University, Chengdu, 610041, China  
25

26 2 Institute of Health Informatics, University College London, 222 Euston Road,  
27 London NW1 2DA  
28

29 3 Department of Gastroenterology, West China Hospital, Sichuan University,  
30 Chengdu, 610041, China  
31

32 4 Department of Oto-Rhino-Laryngology, West China Hospital, Sichuan  
33 University, Chengdu, 610041, China  
34

35 5 Jockey Club School of Public Health and Primary Care, Prince of Wales  
36 Hospital, The Chinese University of Hong Kong, Hong Kong, China  
37

38 6 The Second Clinical College, Nanjing University of Chinese Medicine,  
39 Nanjing, 210046, China  
40

41 7 Chinese Evidence-based Medicine Center, West China Hospital, Sichuan  
42 University, Chengdu, 610041, China  
43

44 8 University College London Hospitals NHS Trust, London, United Kingdom  
45

46 9 Health Data Research UK London, University College London, 222 Euston  
47 Road, London NW1 2DA, United Kingdom  
48

49 10 The National Institute for Health Research University College London  
50 Hospitals Biomedical Research Centre, University College London, 222  
51 Euston Road, London NW1 2DA, UK  
52  
53  
54  
55  
56  
57  
58  
59  
60

1  
2  
3  
4 11 Evidence-Based Medicine Center, School of Basic Medical Sciences,  
5  
6 Lanzhou University, Lanzhou, China

7  
8 12 Division of Population Health and Genomics, Ninewells Hospital and  
9  
10 School of Medicine, University of Dundee, Dundee, Angus, DD1 9SY,  
11  
12 Scotland, United Kingdom

13  
14  
15 # These two authors contributed equally to this work.

16  
17 \* Corresponding authors: Dr. Sheyu Li (lisheyu@gmail.com or  
18  
19 lisheyu@scu.edu.cn or s.r.li@dundee.ac.uk) and Professor Haoming Tian  
20  
21 (hmtian999@126.com), Department of Endocrinology and Metabolism, West  
22  
23 China Hospital, Sichuan University, 37# Guoxue Road, Chengdu, 610041,  
24  
25 Sichuan, China.  
26  
27  
28  
29  
30  
31  
32  
33  
34  
35  
36  
37  
38  
39  
40  
41  
42  
43  
44  
45  
46  
47  
48  
49  
50  
51  
52  
53  
54  
55  
56  
57  
58  
59  
60

## ABSTRACT

### Objectives

Despite the publication of hundreds of trials on gout and hyperuricemia, management of these conditions remains suboptimal. We aimed to assess the quality and consistency of guidance documents for gout and hyperuricemia.

### Design

Systematic review and quality assessment using the Appraisal of Guidelines for Research and Evaluation (AGREE) II methodology.

### Data Sources

PubMed and EMBASE (27 October 2016), two Chinese academic databases, eight guideline databases, and Google and Google scholar (July 2017).

### Eligibility Criteria

We included the latest version of international and national/regional clinical practice guidelines and consensus statements for diagnosis and/or treatment of hyperuricemia and gout, published in English or Chinese.

### Data Extraction and Synthesis

Two reviewers independently screened searched items and extracted data.

Four reviewers independently scored documents using AGREE II.

Recommendations from all documents were tabulated and visualized in a coloured grid.

### Results

Twenty-four guidance documents (16 clinical practice guidelines and 8 consensus statements) published between 2003 and 2017 were included. Included documents performed well in the domains of scope and purpose (median 85.4%, range 66.7%-100.0%) and clarity of presentation (median 79.2%, range 48.6%-98.6%), but unsatisfactory in applicability (median 10.9%, range 0.0%-66.7%) and editorial independence (median 28.1%, range 0.0%-83.3%). The 2017 British Society of Rheumatology guideline received the highest scores. Recommendations were concordant on the target serum uric acid level for long-term control, on some indications for urate-lowering

1  
2  
3  
4 therapy, and on the first-line drugs for urate-lowering therapy and for acute  
5 attack. Substantially inconsistent recommendations were provided for many  
6 items, especially for the timing of initiation of urate-lowering therapy and for  
7 treatment for asymptomatic hyperuricemia.  
8  
9  
10

### 11 **Conclusions**

12  
13 Methodological quality needs improvement in guidance documents on gout  
14 and hyperuricemia. Evidence for certain clinical questions is lacking, despite  
15 numerous trials in this field. Promoting standard guidance development  
16 methods and synthesizing high-quality clinical evidence are potential  
17 approaches to reduce recommendation inconsistencies.  
18  
19  
20  
21  
22

### 23 **Study registration**

24  
25 PROSPERO (CRD42016046104).  
26  
27  
28

### 29 **Keywords**

30  
31 Clinical practice guideline, Hyperuricemia, Gout, Systematic review  
32  
33  
34  
35  
36  
37  
38  
39  
40  
41  
42  
43  
44  
45  
46  
47  
48  
49  
50  
51  
52  
53  
54  
55  
56  
57  
58  
59  
60

## STRENGTHS AND LIMITATIONS OF THIS STUDY

1. The first systematic review to assess the quality of clinical practice guidelines and consensus statements on the diagnosis and treatment for both hyperuricemia and gout.
2. The first systematic review to summarise recommendations for best practice in hyperuricemia and gout.
3. The Appraisal of Guidelines for Research and Evaluation (AGREE) II instrument is an international, structured, validated, and rigorously developed tool.
4. Only guidance documents in English and Chinese were included.
5. Literature search was more than one year old at the time of publication.

## BACKGROUND

Gout is an inflammatory arthritis occurring in response to monosodium urate (MSU) crystals formation, a common and necessary pathogenic factor of which is hyperuricemia. The prevalence of gout and hyperuricemia [1-4], as well as their disease burden [5, 6], are rising globally. However, although more than six hundred related clinical studies [7] have been published to date, the quality of care for gout and hyperuricemia remains suboptimal. The goal of treatment is to reduce the body's total uric acid pool [8, 9] and consequently to minimize the risk of acute flares, arthropathy, nephrolithiasis, and other complications [7, 10, 11]. A study in the United States found that only 22% of patients with gout received therapy adhering to all quality indicators [12]. A nationwide population study in the United Kingdom reported that only 48% of prevalent patients received proper consultation and only 27% of incident patients were provided with urate-lowering therapy (ULT) within one year of diagnosis [6].

High-quality guidance documents are important for improving the quality of care for gout and hyperuricemia at individual, community, and national levels [13]. Current guidance documents for gout and hyperuricemia have been developed by rheumatology, endocrinology, and cardiology groups, at regional, national or international levels. Among these documents, the American College of Rheumatology (ACR) guidelines [14, 15], updated in 2012, and the European League Against Rheumatism (EULAR) guidelines [16-18], updated in 2016, have the most substantial global influence. Besides, the most recent documents (released in 2017) are two national guidelines, from the American College of Physicians (ACP) [19, 20] and the British Society of Rheumatology (BSR) [21], respectively, and one consensus statement, from the Chinese Multi-disciplinary Expert Task Force on Hyperuricemia and Its Related Diseases [22].



1  
2  
3  
4 Despite the variety of documents, current guidelines and consensus on gout  
5 and hyperuricemia provide inconsistent recommendations, even those  
6 released by highly respected professional organizations, such as the ACP and  
7 the ACR [23]. Some distinct differences lie in key aspects for patient care, such  
8 as the pharmacological treatment for asymptomatic hyperuricemic patients,  
9 the timing of initiation of ULT in patients with gout flare [24], and indications for  
10 ULT [25]. These discrepancies may result from ethnic and social differences,  
11 but can be a consequence of inconsistent guideline development [23].  
12  
13 Low-quality guidance documents put individual patients and communities at  
14 risk, and impede the application of guideline recommendations in clinical  
15 practice [26]. Hence, we conducted this study to systematically evaluate the  
16 quality of clinical practice guidelines and consensus statements on gout and  
17 hyperuricemia and to compare key recommendations on patient care from all  
18 included documents.  
19  
20  
21  
22  
23  
24  
25  
26  
27  
28  
29  
30  
31  
32

## 33 **METHODS**

34 Detailed methods of the study have been published previously [27] and this  
35 study was registered with PROSPERO (registration number:  
36  
37 CRD42016046104).  
38  
39  
40  
41  
42

### 43 **Literature search and selection criteria**

44 We systematically searched PubMed and EMBASE from inception to 27  
45 October 2016 using a comprehensive search strategy (Supplementary Table 1  
46 and Supplementary Table 2) to identify guidelines and consensus  
47 recommendations pertaining to the diagnosis and treatment of gout and  
48 hyperuricemia. We searched two academic databases for Chinese  
49 publications (the Chinese Biomedical Literature Database and the Wanfang  
50 Data) and eight guideline databases from inception to 24 July 2017 using  
51 search strategies tailored to different databases (Supplementary Table 3). We  
52 also searched Google and Google scholar in July 2017 for potentially eligible  
53  
54  
55  
56  
57  
58  
59  
60

1  
2  
3  
4 guidelines and consensus recommendations that were not indexed in the  
5  
6 aforementioned databases.  
7  
8

9 We included the latest versions of all international and national/regional clinical  
10  
11 practice guidelines and consensus statements for the diagnosis and/or  
12  
13 treatment of gout and hyperuricemia, published in English or Chinese. Two  
14  
15 reviewers (Q.L., X.L.) independently screened all searched documents.  
16  
17 Reasons for exclusion were provided for documents excluded during the  
18  
19 full-text review (Supplementary Table 4). Disagreements were resolved  
20  
21 through discussion with a third reviewer (S.L.).  
22  
23

#### 24 25 **Data extraction**

26 We extracted the following data from each included document: document  
27  
28 characteristics (e.g., year of publication, funding body, and evidence base),  
29  
30 recommendations for diagnosis and monitoring of gout and hyperuricemia, and  
31  
32 recommendations for management. Data were extracted by one investigator  
33  
34 (Q.L.) and checked by another (X.L.).  
35  
36  
37  
38

#### 39 **Appraisal of guidance documents**

40 All included documents were assessed by four reviewers (Q.L., X.L., J.W., and  
41  
42 H.L.) independently using the Appraisal of Guidelines for Research and  
43  
44 Evaluation (AGREE) II instrument [28]. AGREE II is an internationally  
45  
46 developed and validated tool to evaluate the quality of clinical practice  
47  
48 guidelines [29-31] and consensus statements [32, 33].  
49  
50

51  
52 All reviewers completed an online training tutorial [34] before the  
53  
54 commencement of appraisal to ensure standardization. We adapted detailed  
55  
56 instructions for scoring from the AGREE II User's Manual [28] and provided  
57  
58 objective scoring criteria for each item (Supplementary File 1). We selected  
59  
60 four guidance documents for pilot scoring, during which we discussed and

1  
2  
3 clarified our objective scoring criteria. When scoring for all included documents  
4 was completed, a meeting was held among reviewers and every item with  
5 scores differed more than one point was discussed. After the meeting,  
6 reviewers were given the opportunity to revise their scores or to keep the  
7 original scores. We recorded all original scores, revised scores, and reasons  
8 for modifying scores for quality control purpose, and used the intra-class  
9 correlation coefficient (ICC) to test inter-rater reliability. The ICC was  
10 calculated via IBM SPSS (IBM Co., Armonk, New York, USA) and an ICC  $\geq 0.7$   
11 was considered acceptable [35].  
12  
13  
14  
15  
16  
17  
18  
19  
20  
21  
22

### 23 **Recommendation synthesis**

24 We manually extracted recommendations on key clinical questions from all  
25 included guidance documents and summarized them into four tables: a) the  
26 diagnosis of gout and hyperuricemia, b) the treatment of hyperuricemia, c) the  
27 treatment of acute gout, and d) the treatment of tophi. Recommendations were  
28 extracted by one investigator (Q.L.) and checked by another (X.L.). We further  
29 visualized these recommendations in a five-colour grid to illustrate  
30 inconsistencies. The most frequently recommended content was used as a  
31 reference. We used green to colour documents providing consistent  
32 recommendations, red to colour those providing contrary recommendations,  
33 and blue to colour those providing partially consistent recommendations. A  
34 partially consistent recommendation was defined as a recommendation that  
35 included but not the same as the reference content. Where recommendations  
36 were not given or were not applicable, the cell was coloured in yellow and in  
37 grey, respectively.  
38  
39  
40  
41  
42  
43  
44  
45  
46  
47  
48  
49  
50  
51  
52  
53

### 54 **Patient involvement**

55 Patients or the public were not involved in the conceptualisation or carrying out  
56 of this research.  
57  
58  
59  
60

## RESULTS

### Search results

Overall, we identified 5811 items across academic databases, guideline databases, Google, and Google Scholar. After applying the inclusion and exclusion criteria, 24 guidance documents from 26 papers [14-22, 36-52] were included in the final appraisal and recommendation synthesis (Figure 1).

Studies excluded after full-text review and reasons for exclusion were provided as Supplementary Table 4.

### Characteristics of included guidelines and consensus statements

Table 1 summarized characteristics of included guidance documents, among which 16 were clinical practice guidelines [14-21, 38, 41, 44-46, 48-52] and eight were consensus statements [22, 36, 37, 39, 40, 42, 43, 47]. 16 national or regional organizations and three international groups (i.e., the 3e [Evidence, Expertise, Exchange] Initiative, the EULAR, and the development group for the Treat-to-target [T2T] recommendations) published these documents between 2003 to 2017. 16 documents [14-18, 21, 22, 36-38, 40, 42, 43, 45, 46, 49, 50] were issued by rheumatology organizations and seven [16-18, 36, 39, 42, 43] were developed by multinational development groups. 17 documents [14-18, 21, 22, 36, 38-41, 43-46, 49, 51] provided information on their guideline development group, among which 11 [14-17, 19-21, 36, 41-43, 45, 46] explicitly stated the involvement of a methodologist. 12 documents [14-18, 21, 22, 38-41, 43-46, 49, 51] provided information on their target audience, among which only three [16, 38, 44] considered patients as one of the target audiences. 18 documents [14-21, 36, 39-43, 45, 46, 48-52] conducted systematic literature review as part of their development process, among which 17 documents [14-21, 36, 39-41, 43, 45, 46, 48-52] reported the level of evidence supporting recommendations and 16 [16-21, 36, 39-41, 43, 45, 46, 48-52] graded the strength of recommendations. Ten documents [16, 19-21, 39, 42, 46, 48, 49, 51, 52] clearly stated being externally reviewed. Five [19-21,

1  
2  
3  
4 46, 49, 50] provided a clear time of update plan. 12 documents [14, 15, 17-21,  
5  
6 36, 39, 42, 46, 49, 51, 52] provided information on their funding body, among  
7  
8 which six [17, 36, 39, 46, 49, 51] were fully or partially funded by the  
9  
10 pharmaceutical industry and the rest did not clearly declare their funding body.  
11

### 13 **Appraisal of guidelines and consensus statements**

15 Standardized AGREE II domain scores for each guidance document were  
16  
17 shown as Figure 2 and were provided in value as Supplementary Table 5.  
18  
19 Scores for each AGREE II item were provided in mean as Supplementary  
20  
21 Table 6 and in detail as Supplementary Table 7. The overall quality of  
22  
23 guidance documents, as assessed by AGREE II, varied both between  
24  
25 documents across domains and within documents between domains. The  
26  
27 document with the highest domain scores was the gout management guideline  
28  
29 published by the BSR in 2017 [21], with five domains scoring above the upper  
30  
31 quartile, followed by the guidelines published by the ACP in 2017 [19, 20], and  
32  
33 the 2015 gout classification criteria by the ACR and the EULAR jointly [42],  
34  
35 both with four domains scoring above the upper quartile. Guidelines did not  
36  
37 always score higher than consensus statements. No tendency of improvement  
38  
39 in the quality score over time was observed (Supplementary Figure 1).  
40

42 The AGREE II instrument evaluated guidelines and consensus statements in  
43  
44 six domains, from the development, dissemination, to implementation. The  
45  
46 scope and purpose (domain 1) of a document clarifies its clinical questions.  
47  
48 Proper involvement of stakeholders (domain 2) balances individuals' biases.  
49  
50 The rigour of development domain (domain 3) is most concerned by clinicians  
51  
52 and ensures the validity of development methodology [53]. Clearly presented  
53  
54 recommendations (domain 4) conveyed precise and accessible information  
55  
56 from the development group to clinicians. Good performances in the  
57  
58 applicability domain (domain 5) and the editorial independence domain  
59  
60 (domain 6) guarantee the usefulness and the independence of documents.

1  
2  
3  
4  
5  
6  
7  
8  
9  
10  
11  
12  
13  
14  
15  
16  
17  
18  
19  
20  
21  
22  
23  
24  
25  
26  
27  
28  
29  
30  
31  
32  
33  
34  
35  
36  
37  
38  
39  
40  
41  
42  
43  
44  
45  
46  
47  
48  
49  
50  
51  
52  
53  
54  
55  
56  
57  
58  
59  
60

Guidance documents received the highest scores for the scope and purpose domain (median 85.4%, range 66.7% to 100.0%) and the clarity of presentation domain (median 79.2%, range 48.6% to 98.6%), and the lowest scores for the applicability domain (median 10.9%, range 0.0% to 66.7%) and the editorial independence domain (median 28.1%, range 0.0% to 83.3%). The worst scored item was the monitoring or auditing criteria item (mean score 1.2, range 1.0-4.0), followed by the implementation advice or tools item (mean 1.7, range 1.0-4.8), the external review item (mean 2.1, range 1.0-6.0), and the updating procedure item (mean 2.1, range 1.0-6.5).

The ICC was 0.896. Group discussion modified 365/2208 (16.53%) of individual scores.

### **Synthesis of recommendations**

Included guidance documents addressed four major themes: diagnosis of gout and hyperuricemia, treatment for hyperuricemia, treatment for acute gout attack, and treatment for tophi. Figure 3 showed key recommendations and their inconsistencies.

### **Approaches to diagnostic strategies for gout and hyperuricemia**

Thirteen guidance documents [17-20, 22, 36, 38, 40-43, 46, 49, 51] covered the diagnosis of gout and 11 [17, 22, 37, 38, 45-51] covered that of hyperuricemia. Supplementary Table 8 showed key recommendations. The identification of MSU crystals in synovial fluid or tophi was a gold standard for definite diagnosis, as recommended by all included documents. In the absence of MSU crystals, three aspects were commonly evaluated for gout diagnosis, namely the clinical manifestation, considered by all documents; the laboratory result, considered by all but one document [49]; and the imaging result, considered by all but four documents [17, 19, 20, 49, 51].

1  
2  
3  
4  
5  
6  
7  
8  
9  
10  
11  
12  
13  
14  
15  
16  
17  
18  
19  
20  
21  
22  
23  
24  
25  
26  
27  
28  
29  
30  
31  
32  
33  
34  
35  
36  
37  
38  
39  
40  
41  
42  
43  
44  
45  
46  
47  
48  
49  
50  
51  
52  
53  
54  
55  
56  
57  
58  
59  
60

Guidance documents differed when recommending the cut-off serum uric acid (SUA) level to diagnose hyperuricemia. For the patient population in general, four documents [38, 47, 48, 51] recommended 7.0 mg/dL (or 420  $\mu\text{mol/L}$ ) as the cut-off, while two [17, 45] preferred 6.8 mg/dL. Five documents [22, 37, 46, 49, 50] provided gender-specific cut-offs, recommending 6.0 mg/dL (or approximately 360  $\mu\text{mol/L}$ ) in female and 7.0 mg/dL (or approximately 420  $\mu\text{mol/L}$ ) in male. Asymptomatic hyperuricemia was defined in seven documents [36, 38, 46-50], among which six [36, 38, 46-48, 50] excluded patients with gout and two [36, 48] excluded patients with tophi when making the diagnosis. Attitudes were inconsistent for whether or not patients with renal diseases can be diagnosed with asymptomatic hyperuricemia. Patients with renal diseases were not eligible for the diagnosis in the Japanese [48] and the Philippine [50] guidelines, but patients with pre-existing renal or cardiovascular diseases can receive this diagnosis in the 3e initiative document [36].

### **Approaches to treatment for hyperuricemia**

Twenty-two guidance documents [14-17, 19-22, 36-41, 43-52] covered the treatment for hyperuricemia and Supplementary Table 9 summarized key recommendations. All but three documents [19, 20, 44, 52] explicitly provided target levels for long-term SUA control, most of which recommended 6.0 mg/dL (or 360  $\mu\text{mol/L}$ ), except the South African guideline [51] which recommended 5.0mg/dL (300  $\mu\text{mol/L}$ ). Two documents [16, 22] recommended a lower limit of 3.0 mg/dL (or 180  $\mu\text{mol/L}$ ) for long-term SUA management. Among these two documents, only the 2016 EULAR guideline [16] explained the reason for providing a lower limit was that low SUA might increase the risk of neurodegenerative diseases, but the level of evidence and the grade of recommendation were both low.

All but six guidance documents [36, 39, 40, 43, 44, 52] provided explicitly

1  
2  
3  
4 indications for long-term ULT. The most commonly recommended indications  
5 were recurrent attacks [14-17, 19-22, 41, 45, 48-51], tophi [14-17, 19-22, 38,  
6 41, 45, 48-51], urate nephrolithiasis [14-17, 19-22, 37, 38, 49, 50], arthropathy  
7 [16, 17, 21, 22, 38, 41, 45, 49], and comorbidities [14-16, 19-22, 37, 47, 49,  
8 50]. The definition of recurrent attacks varied from at least once per year [17]  
9 to at least three times per year [49], while the majority of documents [14-16,  
10 19-21, 41] recommended twice per year as the cut-off.  
11  
12  
13  
14  
15  
16  
17  
18

19 Regarding the timing to initiate ULT, the documents did not agree on whether  
20 to start pharmacological ULT after an acute attack [17, 21, 22, 36-38, 40, 48,  
21 49, 51, 52] or during an attack [14, 15, 37]. When recommending to start ULT  
22 after an attack, the preferred time to wait since the attack resolved varied from  
23 two weeks [37, 48] to six weeks [52]. All guidance documents based their  
24 recommendation for this question on expert opinions, due to insufficient  
25 evidence. The explanations provided for starting ULT after an attack were that  
26 ULT was better discussed when a patient was not painful [21], and that ULT  
27 initiation could prolong or worsen the acute attack [51]. Two documents [16,  
28 39] explicitly presented the currently conflicting views and insufficient evidence  
29 and stated consequently no recommendation for this issue.  
30  
31  
32  
33  
34  
35  
36  
37  
38  
39  
40  
41  
42

43 When pharmacological ULT options were explicitly provided, allopurinol was  
44 recommended by all guidance documents [14-17, 21, 36, 40, 43, 45, 46,  
45 48-50] to be the first-line drug, while febuxostat was recommended by three  
46 documents [14, 15, 17, 46] to be the first-line and by six documents [16, 21, 36,  
47 40, 43, 45] to be the second-line. However, recommendations on the dosage  
48 of allopurinol varied largely. The maximum daily allopurinol dose  
49 recommended varied from 300 mg [51], 600 mg [22, 37, 47], 800 mg [14, 15,  
50 17, 38, 45], to 900 mg [21, 43, 46], and the daily starting dose recommended in  
51 patients with normal renal function varied from 50 mg [19, 20, 22, 47, 48, 51] to  
52 200 mg [21]. As for patients with impaired renal function, the cut-off renal  
53  
54  
55  
56  
57  
58  
59  
60



1  
2  
3  
4 function to initiate dose adjustment was provided diversely as creatinine  
5 clearance (CCr) 20-140 mL/min [37, 45, 46, 49, 51], or estimated glomerular  
6 filtration rate (eGFR) 130 ml/min/1.73m<sup>2</sup> [21]. One document preferred to  
7 depend allopurinol dosage solely on eGFR by limiting the maximum daily dose  
8 to 1.5 mg/eGFR in patients with renal impairment [22]. HLA-B\*5801 gene  
9 screening prior to allopurinol use was recommended by five guidance  
10 documents [14, 15, 21, 22, 37, 38].  
11  
12  
13  
14  
15  
16  
17  
18

19 For patients with asymptomatic hyperuricemia, 14 guidance documents [14,  
20 15, 17, 21, 36-40, 43, 47-49, 51, 52] commented on the option of  
21 pharmacological ULT, among which, five [17, 21, 38, 51, 52] explicitly  
22 recommended no treatment under any circumstances. Three documents  
23 [47-49] recommended pharmacological treatments in asymptomatic  
24 hyperuricemia patients with comorbidities [47, 48] or with very high SUA levels  
25 [40, 47-49], but their cut-off SUA level to indicate ULT varied from 8.0 mg/dL  
26 [47, 48] to 13.0 mg/dL [49]. We also found that the Portuguese consensus [40]  
27 was incoherent itself by stating that no pharmacological ULT was  
28 recommended as a general principle, but also stating that pharmacological  
29 ULT was recommended for patients with SUA higher than 9 mg/dL. No direct  
30 evidence was provided by any document to support pharmacological treatment  
31 for asymptomatic hyperuricemia, and such recommendations were only made  
32 in concern of the onset of gout [40] and the risk of cardiovascular events [47,  
33 48].  
34  
35  
36  
37  
38  
39  
40  
41  
42  
43  
44  
45  
46  
47  
48  
49

### 50 **Approaches to treatment for acute gout attack**

51 Twenty-one guidance documents [14-17, 19-22, 36-41, 43-46, 48-52] covered  
52 the treatment for acute gout attack and Supplementary Table 10 summarized  
53 their key recommendations. Non-steroidal anti-inflammatory drugs (NSAIDs)  
54 was recommended by all but three documents [19, 20, 39, 44] as the first line  
55 pharmacological treatment, while colchicine by 11 documents [14-17, 21, 22,  
56  
57  
58  
59  
60

1  
2  
3  
4 36, 37, 40, 43, 45, 48]. Colchicine was recommended to be given in a fixed  
5  
6 dose by three documents [38, 40, 48] and in a loading dose followed by  
7  
8 different doses by six documents [14-17, 19, 20, 22, 38, 51, 52]. Seven  
9  
10 documents [21, 36, 41, 43, 45, 49, 50] only recommended the total daily dose  
11  
12 for colchicine, regardless of the regimen, and their doses recommended varied  
13  
14 from 1 mg [21, 49, 50] to 2.4 mg [49]. Surprisingly, one document [43]  
15  
16 recommended 1.8 g colchicine in 24 hours without any further explanation,  
17  
18 which was likely a typo. Systemic steroids were recommended by all but three  
19  
20 documents [37, 39, 44], among which six [14-17, 19, 20, 36, 43] recommended  
21  
22 them as the first-line option and ten [21, 22, 38, 41, 45, 46, 48, 50-52]  
23  
24 recommended them when NSAIDs and colchicine were contraindicated or  
25  
26 intolerant. Intra-articular steroids injection was recommended by 14  
27  
28 documents [14-17, 21, 22, 36, 38, 40, 43, 45, 46, 49, 51, 52], among which five  
29  
30 [14-16, 21, 36, 43] clearly recommended it as the first-line option.  
31  
32

### 33 **Approaches to treatment for tophi**

34  
35 Twenty-one guidance documents [14-17, 19-22, 36-41, 43-46, 48-52] covered  
36  
37 treatment for tophi and Supplementary Table 11 showed their key  
38  
39 recommendations. Surgery was recommended by nine documents [22, 36, 38,  
40  
41 40, 43, 48, 49, 51], among which five [22, 36, 38, 43, 49] explicitly presented its  
42  
43 indications, most commonly nerve compression [22, 36, 38, 43] and infection  
44  
45 [36, 38, 43]. The risk for surgery was only discussed by one document [51] and  
46  
47 only the risk of delayed wound healing was stated. Long-term ULT was  
48  
49 recommended by all but two documents [44, 52], but the drugs used for  
50  
51 pharmacological treatment was only explicitly recommended by eight of them  
52  
53 [15-17, 21, 37, 43, 46, 51].  
54  
55

## 56 **DISCUSSION**

### 57 **Principal findings and interpretations**

58  
59 This systematic review, including 16 guidelines and eight consensus  
60

1  
2  
3  
4 statements, found generally low methodological quality and inconsistent  
5  
6 recommendations from guidance documents covering the diagnosis and  
7  
8 management of gout and hyperuricemia. During revision of our work, the  
9  
10 English version of two documents, from the Chinese Multidisciplinary Expert  
11  
12 Task Force on Hyperuricemia and Related Diseases [54] and the Taiwan  
13  
14 Rheumatologist Association [55], respectively, were released. Despite  
15  
16 increase in the number of guidance documents published between 2003 and  
17  
18 2017, the quality of documents in all domains did not seem to improve with  
19  
20 time. To date, this is the first systematic appraisal for the quality of guidelines  
21  
22 and consensus statements pertaining to both gout and hyperuricemia.  
23  
24

### 25 **Comparison with existing research**

26  
27 Guidance documents assessed in our study performed well in the domains of  
28  
29 scope and purpose (domain 1) and clarity of presentation (domain 4), but  
30  
31 poorly in the domain of applicability (domain 5). These results were consistent  
32  
33 with two previous reviews [56, 57], one of which systematically assessed the  
34  
35 quality of all guidelines for gout and the other assessed three documents  
36  
37 released respectively by the 3e initiative [36], the ACR [14, 15], and the  
38  
39 EULAR [18, 58]. Our study systematically included both guidelines and  
40  
41 consensus statements in the field of both gout and hyperuricemia, and the  
42  
43 diverse performance by different AGREE II domains was shared across both  
44  
45 types of document.  
46  
47

48  
49 This distribution of AGREE II domain scores has been observed by many  
50  
51 previous guideline appraisal studies, in which documents scored higher in the  
52  
53 scope and purpose domain and the clarity of presentation domain, and lower  
54  
55 in the applicability domain and the editorial independence domain. This  
56  
57 domain score distribution was not only shared by guidance documents for  
58  
59 endocrinology diseases, such as diabetes [59, 60] and thyroid disorders [31,  
60  
61], and rheumatology diseases, such as rheumatoid arthritis [32, 62, 63] and

1  
2  
3  
4 systemic lupus erythematosus [64], but also shared by documents for  
5 diseases in other clinical specialities [33, 65-67]. Despite generally low and  
6 varied scores in the applicability domain, guidance documents for gout and  
7 hyperuricemia performed obviously poorer comparing with documents for  
8 other conditions [31-33, 59-61, 63-67], suggesting that improving the  
9 usefulness of guidance being more challenging in gout and hyperuricemia.  
10 One major impediment to good applicability of guidance document is the time  
11 and cost to perform economic evaluations and pilot studies, and a stable and  
12 long-term task force of guideline development is required to conduct these  
13 evaluations and studies. Although forming such a task force is practically  
14 difficult in some regions and countries, guidance documents were suggested  
15 to at least inform audience the need to consider these issues [65]. Low scores  
16 in the editorial independence domain often resulted from lacking of detailed  
17 information on the influence of funding body and on the conflict of interests.  
18 We found that 50% of documents declaring funding sources were supported  
19 by the pharmaceutical industry, calling for awareness of the potential influence  
20 of pharmaceutical industry on the synthesis of clinical guidance and for the  
21 need of promoting transparency in financial declaration.  
22  
23  
24  
25  
26  
27  
28  
29  
30  
31  
32  
33  
34  
35  
36  
37  
38  
39  
40

### 41 **Clinical implications and future research**

42 Guidance documents were concordant and recommended a target for SUA <  
43 6.0 mg/dL (or 360  $\mu$ mol/L) for long-term control, to consider recurrent attacks  
44 as one of the indications for ULT (although the definitions for recurrent attacks  
45 differed), to consider allopurinol as the first-line ULT and NSAIDs as the  
46 first-line drug in acute attack, and to consider long-term ULT in patient with  
47 tophi. Despite these similarities, recommendations differed in the majority of  
48 items and these discrepancies might come from several sources, including  
49 ethnic difference, quality of documents, and lack of evidence.  
50  
51  
52  
53  
54  
55  
56  
57  
58  
59  
60

Ethnic and social differences are important reasons why recommendations

1  
2  
3  
4 may vary between guidelines and consensus, and such diversity is to be  
5 encouraged, in order to best meet the needs of local populations. One  
6 example was that Asian guidance documents were more likely to recommend  
7 HLA-B\*5801 gene screening before prescribing allopurinol [22, 37, 38].  
8  
9 HLA-B\*5801 gene screening was promoted because the risk of  
10 hypersensitivity reactions associated with allopurinol is significantly increased  
11 in individuals carrying the variant allele HLA-B\*5801. Studies suggested that  
12 the frequency of this variant allele are higher in Han Chinese, Korean, and Tai  
13 people than that in the Caucasian population [14, 15, 21], and that that  
14 HLA-B\*5801 gene screening prior to allopurinol initiation is cost-effective for  
15 Asians but not Caucasians [68, 69]. These findings are consistent with the  
16 preferences of Asian documents. Providing ethnicity-specific  
17 recommendations or explicitly specifying the ethnicity of target audience helps  
18 clarify this source of inconsistency and improves the precision of  
19 recommendations.  
20  
21  
22  
23  
24  
25  
26  
27  
28  
29  
30  
31  
32  
33

34  
35 However, it is worrying that low methodological quality of guidance documents  
36 may also lead to discrepant recommendations and consequent variability in  
37 application. Our study suggested that comparing to high-quality documents  
38 [16, 19-21, 36, 42, 46], low-quality ones [22, 37, 38, 44, 47, 52] were more  
39 likely to provide ambiguous prioritization of both a) ULT drugs for  
40 hyperuricemia and b) steroid options for acute attack. A quick notice was that  
41 when making this rough summary, we considered a document to be  
42 high-quality when it scored above the upper quartile in at least three out of the  
43 six AGREE II domains, and to be low-quality when it scored below the lower  
44 quartile in at least three out of the six AGREE II domains. Among all AGREE II  
45 domains, those pertaining to stakeholder involvement, rigor of development,  
46 applicability and editorial independence could be improved by standardizing  
47 developing processes, which consequently improved the reliability of  
48 recommendations. These results reinforced that it is better for clinicians to  
49  
50  
51  
52  
53  
54  
55  
56  
57  
58  
59  
60

1  
2  
3 refer to high-quality guidance documents instead of the low-quality ones.  
4  
5 However, when high-quality documents are unavailable in local language,  
6  
7 referring to low-quality local documents might mislead clinical practice in the  
8  
9 region. Selecting appropriate guidance documents to follow in clinical practice  
10  
11 is thus more challenging for non-English speaking countries, including China  
12  
13 [13]. Moreover, the oldest document included in our study was the South  
14  
15 African Medical Association guideline, published in 2003, and no guidance  
16  
17 document in either English or Chinese was released in South African in the  
18  
19 past 16 years. This finding suggested that some old documents might still  
20  
21 affect regional practice. Efforts to timely update or declare the withdrawal of  
22  
23 existing guidance documents are also critical for clinical practice.  
24  
25

26  
27 Guidance documents are considered as the starting point to identify evidence  
28  
29 gaps and to prioritize research questions [70]. Evidence gaps were discussed  
30  
31 in the recommendations of both a) treatment for asymptomatic hyperuricemia,  
32  
33 by five [14, 15, 36, 37, 39, 43] out of 14 documents [14, 15, 17, 21, 36-40, 43,  
34  
35 47-49, 51, 52], and b) timing to initiate ULT, by two [16, 39] out of 14  
36  
37 documents [14-17, 21, 22, 36-40, 48, 49, 51, 52]. Although the rest of  
38  
39 documents provided explicit recommendations, they based their  
40  
41 recommendations either on indirect evidence or expert opinions. As for gout  
42  
43 and hyperuricemia, evidence synthesis is warranted for the effects of  
44  
45 pharmacological ULT in patients with asymptomatic hyperuricemia and for the  
46  
47 optimal timing to initiate ULT in patients with the acute attack.  
48  
49

## 50 **Strengths and limitations**

51  
52 Strengths of our review included a systematic approach to identify guidance  
53  
54 documents pertaining to the diagnosis and management of hyperuricemia and  
55  
56 gout. Both guidelines and consensus statements were evaluated and  
57  
58 compared. We used the AGREE II instrument, an international, validated and  
59  
60 rigorously developed tool, to assess the quality of document development and

1  
2  
3 we tailored the AGREE II instrument to point-by-point scoring criteria  
4 (Supplementary File 1) to improve the objectivity and reproducibility of our  
5 study. We summarized all key recommendations, and compared and  
6 visualized the inconsistencies among them, providing a concise but  
7 informative overview for clinicians and researchers.  
8  
9  
10  
11  
12

13  
14  
15 Our study also has limitations. Firstly, we only included documents published  
16 in English or Chinese, which could lead to a risk of neglecting essential  
17 documents from regions not using English or Chinese as the first language.  
18 We attempted to mitigate this risk by tailoring our search strategy to identify the  
19 English versions of guidance documents published from these regions.  
20 Secondly, unconscious bias from a subjective rating of documents was  
21 inevitable. We avoided inviting co-authors of guidance documents as  
22 reviewers to prevent subconscious competing interest, and conducted two  
23 rounds of group discussions to minimize subjective bias. Thirdly, the AGREE II  
24 instrument itself has weaknesses [31, 59, 67, 71], although it was the most  
25 commonly used tool to assess the quality of guidance documents. The AGREE  
26 system assigned equal weight to all six domains, regardless of their relative  
27 importance [72]. Although better methods of guideline development and  
28 greater transparency of reporting are associated with more reliable  
29 recommendations, they do not guarantee better patient outcomes. Hence, the  
30 quality scores assessed by the AGREE II should be interpreted with caution,  
31 especially when used to indicate which guidelines to follow in clinical practice.  
32 Moreover, the subjective interpretation of scoring criteria impeded the  
33 replicability of AGREE II studies and direct comparison of quality scores in  
34 guidance documents provided by different reviews. Fourthly, our literature  
35 search was over 12 months old when the study was ready to publish, affecting  
36 the timeliness of our study. However, we eventually decided not to update the  
37 literature at a late stage of the study, because of the infeasibility of bringing  
38 together all reviewers with another round of centralized training and appraisal,  
39  
40  
41  
42  
43  
44  
45  
46  
47  
48  
49  
50  
51  
52  
53  
54  
55  
56  
57  
58  
59  
60

1  
2  
3  
4 and the risk of inconsistent scoring criteria for each reviewer after a long time  
5 since their previous scoring. Moreover, a quick review of publications in  
6 PubMed, using the same search strategy (Supplementary table 1) and limiting  
7 the publication date from 1 September 2016 to 21 January 2019, did not found  
8 any new relevant documents, reassuring us of the timeliness of our study.  
9  
10  
11  
12  
13  
14

## 15 **CONCLUSIONS**

16  
17 The methodological quality needs to be improved in the current guidelines and  
18 consensuses on the diagnosis and management of gout and hyperuricemia,  
19 as assessed by the AGREE II. Inconsistent recommendations are common,  
20 even in some key aspects. Promoting standard methods for guidance  
21 documents development, and synthesizing high-quality clinical evidence to fill  
22 in evidence gaps, are warranted to improve the quality of guidance documents.  
23  
24  
25  
26  
27  
28  
29  
30

## 31 **COMPETING INTERESTS**

32 The authors declare that they have no competing interests.  
33  
34  
35  
36

## 37 **FUNDING**

38 This research received no specific funding from any bodies in the public,  
39 commercial, or not-for-profit sectors. Anoop Shah is supported by the National  
40 Institute for Health Research (NIHR) University College London Hospitals  
41 Biomedical Research Centre and a THIS Institute postdoctoral fellowship.  
42 Harry Hemingway is a NIHR Senior Investigator. His work is supported by: 1.  
43 Health Data Research UK, which is funded by the UK Medical Research  
44 Council, Engineering and Physical Sciences Research Council, Economic and  
45 Social Research Council, Department of Health and Social Care (England),  
46 Chief Scientist Office of the Scottish Government Health and Social Care  
47 Directorates, Health and Social Care Research and Development Division  
48 (Welsh Government), Public Health Agency (Northern Ireland), British Heart  
49 Foundation and Wellcome Trust. 2. The BigData@Heart Consortium, funded  
50  
51  
52  
53  
54  
55  
56  
57  
58  
59  
60



1  
2  
3  
4 by the Innovative Medicines Initiative-2 Joint Undertaking under grant  
5 agreement No. 116074. This Joint Undertaking receives support from the  
6 European Union's Horizon 2020 research and innovation programme and  
7 EFPIA; it is chaired, by DE Grobbee and SD Anker, partnering with 20  
8 academic and industry partners and ESC. 3. The NIHR University College  
9 London Hospitals Biomedical Research Centre. Sheyu Li was supported by  
10 grants from the National Natural Science Foundation of China [grant number  
11 81400811 and 21534008], National Basic Research Program of China [grant  
12 number 2015CB942800], the Scientific Research Project of Health and Family  
13 Planning Commission of Sichuan Province [grant number 130029, 150149,  
14 17PJ063 and 17PJ445], Cholesterol Fund by China Cardiovascular  
15 Foundation and China Heart House and the International Visiting Program for  
16 Excellent Young Scholars of Sichuan University.

## 30 **AUTHORS' CONTRIBUTIONS**

31 HT and SL conceived this study. QL, JSWK, and SL designed the  
32 inclusion/exclusion criteria and the searching resource and strategy. QL,  
33 JSWK, HC, LL, and XS designed the appraisal strategy of each included  
34 guideline and consensus. QL and XL searched literature search and extracted  
35 data. QL, XL, JW, HL, and SL assessed the quality of each document. QL  
36 analysed and visualized the outcomes. SC, AS, YC, AZ, XS, and HH provided  
37 critical review. QL, XL, and SL drafted the manuscript. All authors discussed  
38 actively in the protocol of the study.

## 50 **DATA AVAILABILITY**

51 All data in this paper were obtained from published studies. No additional data  
52 are available from the authors.  
53  
54  
55  
56  
57  
58  
59  
60

## REFERENCES

1. Lawrence RC, Felson DT, Helmick CG, Arnold LM, Choi H, Deyo RA, Gabriel S, Hirsch R, Hochberg MC, Hunder GG: **Estimates of the prevalence of arthritis and other rheumatic conditions in the United States: Part II.** *Arthritis & Rheumatology* 2008, **58**(1):26-35.
2. Liu R, Han C, Wu D, Xia X, Gu J, Guan H, Shan Z, Teng W: **Prevalence of hyperuricemia and gout in mainland China from 2000 to 2014: a systematic review and meta-analysis.** *BioMed research international* 2015, **2015**.
3. Kuo C-F, Grainge MJ, Zhang W, Doherty M: **Global epidemiology of gout: prevalence, incidence and risk factors.** *Nature reviews rheumatology* 2015, **11**(11):649.
4. Smith E, March L: **Global prevalence of hyperuricemia: a systematic review of population-based epidemiological studies.** *Arthritis & Rheumatology* 2015, **67**:2690-2692.
5. Smith E, Hoy D, Cross M, Merriman TR, Vos T, Buchbinder R, Woolf A, March L: **The global burden of gout: estimates from the Global Burden of Disease 2010 study.** *Annals of the rheumatic diseases* 2014, **73**(8):1470-1476.
6. Kuo C-F, Grainge MJ, Mallen C, Zhang W, Doherty M: **Rising burden of gout in the UK but continuing suboptimal management: a nationwide population study.** *Annals of the rheumatic diseases* 2014:annrheumdis-2013-204463.
7. Li X, Meng X, Timofeeva M, Tzoulaki I, Tsilidis KK, Ioannidis P, Campbell H, Theodoratou E: **Serum uric acid levels and multiple health outcomes: umbrella review of evidence from observational studies, randomised controlled trials, and Mendelian randomisation studies.** *BMJ (Clinical research ed)* 2017, **357**:j2376.
8. Tausche A-K, Jansen TL, Schröder H-E, Bornstein SR, Aringer M, Müller-Ladner U: **Gout—current diagnosis and treatment.** *Deutsches*

- 1  
2  
3  
4  
5  
6  
7  
8  
9  
10  
11  
12  
13  
14  
15  
16  
17  
18  
19  
20  
21  
22  
23  
24  
25  
26  
27  
28  
29  
30  
31  
32  
33  
34  
35  
36  
37  
38  
39  
40  
41  
42  
43  
44  
45  
46  
47  
48  
49  
50  
51  
52  
53  
54  
55  
56  
57  
58  
59  
60
- Aerzteblatt International* 2009, **106**(34-35):549.
9. Dincer HE, Dincer AP, Levinson DJ: **Asymptomatic hyperuricemia: to treat or not to treat.** *Cleveland Clinic journal of medicine* 2002, **69**(8):594-608.
10. Pittman JR, Bross MH: **Diagnosis and management of gout.** *American family physician* 1999, **59**(7):1799-1806, 1810.
11. Perez-Ruiz F, Lioté F: **Lowering serum uric acid levels: what is the optimal target for improving clinical outcomes in gout?** *Arthritis care & research* 2007, **57**(7):1324-1328.
12. Singh JA, Hodges JS, Toscano JP, Asch SM: **Quality of care for gout in the US needs improvement.** *Arthritis care & research* 2007, **57**(5):822-829.
13. Chen Y, Wang C, Shang H, Yang K, Norris SL: **Clinical practice guidelines in China.** *BMJ (Clinical research ed)* 2018, **360**:j5158.
14. Khanna D, Fitzgerald JD, Khanna PP, Bae S, Singh MK, Neogi T, Pillinger MH, Merrill J, Lee S, Prakash S *et al*: **2012 American College of Rheumatology guidelines for management of gout. Part 1: systematic nonpharmacologic and pharmacologic therapeutic approaches to hyperuricemia.** *Arthritis care & research* 2012, **64**(10):1431-1446.
15. Khanna D, Khanna PP, Fitzgerald JD, Singh MK, Bae S, Neogi T, Pillinger MH, Merrill J, Lee S, Prakash S *et al*: **2012 American college of rheumatology guidelines for management of gout. part 2: Therapy and antiinflammatory prophylaxis of acute gouty arthritis.** *Arthritis Care and Research* 2012, **64**(10):1447-1461.
16. Richette P, Doherty M, Pascual E, Barskova V, Becce F, Castaneda-Sanabria J, Coyfish M, Guillo S, Jansen TL, Janssens H *et al*: **2016 updated EULAR evidence-based recommendations for the management of gout.** *Annals of the rheumatic diseases* 2016.

- 1  
2  
3  
4 17. Hamburger M, Baraf HS, Adamson TC, 3rd, Basile J, Bass L, Cole B,  
5  
6  
7  
8  
9  
10  
11  
12  
13  
14  
15  
16  
17  
18  
19  
20  
21  
22  
23  
24  
25  
26  
27  
28  
29  
30  
31  
32  
33  
34  
35  
36  
37  
38  
39  
40  
41  
42  
43  
44  
45  
46  
47  
48  
49  
50  
51  
52  
53  
54  
55  
56  
57  
58  
59  
60  
20. Qaseem A, Harris RP, Forciea MA: **Management of acute and  
recurrent gout: a clinical practice guideline from the American  
College of Physicians.** *Annals of internal medicine* 2017,  
**166(1):58-68.**
17. Hamburger M, Baraf HS, Adamson TC, 3rd, Basile J, Bass L, Cole B,  
Doghramji PP, Guadagnoli GA, Hamburger F, Harford R *et al*: **2011  
Recommendations for the diagnosis and management of gout and  
hyperuricemia.** *Postgraduate medicine* 2011, **123(6 Suppl 1):3-36.**
18. Zhang W, Doherty M, Pascual E, Bardin T, Barskova V, Conaghan P,  
Gerster J, Jacobs J, Leeb B, Liote F *et al*: **EULAR evidence based  
recommendations for gout. Part I: Diagnosis. Report of a task  
force of the Standing Committee for International Clinical Studies  
Including Therapeutics (ESCSIT).** *Annals of the rheumatic diseases*  
2006, **65(10):1301-1311.**
19. Qaseem A, McLean RM, Starkey M, Forciea MA: **Diagnosis of acute  
gout: a clinical practice guideline from the American College of  
Physicians.** *Annals of internal medicine* 2017, **166(1):52-57.**
20. Qaseem A, Harris RP, Forciea MA: **Management of acute and  
recurrent gout: a clinical practice guideline from the American  
College of Physicians.** *Annals of internal medicine* 2017,  
**166(1):58-68.**
21. Hui M, Carr A, Cameron S, Davenport G, Doherty M, Forrester H,  
Jenkins W, Jordan KM, Mallen CD, McDonald TM: **The British Society  
for Rheumatology guideline for the management of gout.**  
*Rheumatology* 2017, **56(7):1056-1059.**
22. Multi-disciplinary Expert Task Force on Hyperuricemia and Its Related  
Diseases. **Chinese multi-disciplinary consensus on the diagnosis  
and treatment of hyperuricemia and its related diseases.** *Chin J  
Intern Med.* 2017: **56(3): 235-248** (Original document in Chinese).
23. McLean RM: **The long and winding road to clinical guidelines on  
the diagnosis and management of gout.** *Annals of internal medicine*  
2017, **166(1):73-74.**
24. Bardin T, Richette P: **Crystal arthritis: new ACR guidelines for gout  
management hold some surprises.** *Nature Reviews Rheumatology*

- 2013, **9**(1):9.
25. Dalbeth N, Bardin T, Doherty M, Lioté F, Richette P, Saag KG, So AK, Stamp LK, Choi HK, Terkeltaub R: **Discordant American College of Physicians and international rheumatology guidelines for gout management: consensus statement of the Gout, Hyperuricemia and Crystal-Associated Disease Network (G-CAN)**. *Nature Reviews Rheumatology* 2017, **13**(9):561.
26. Khanna PP, FitzGerald J: **Evolution of management of gout: a comparison of recent guidelines**. *Current opinion in rheumatology* 2015, **27**(2):139-146.
27. Li Q, Li X, Kwong JS-W, Chen H, Sun X, Tian H, Li S: **Diagnosis and treatment for hyperuricaemia and gout: a protocol for a systematic review of clinical practice guidelines and consensus statements**. *BMJ open* 2017, **7**(6):e014928.
28. Brouwers MC, Kho ME, Browman GP, Burgers JS, Cluzeau F, Feder G, Fervers B, Graham ID, Grimshaw J, Hanna SE: **AGREE II: advancing guideline development, reporting and evaluation in health care**. *Canadian Medical Association Journal* 2010, **182**(18):E839-E842.
29. Nuckols TK, Anderson L, Popescu I, Diamant AL, Doyle B, Di Capua P, Chou R: **Opioid prescribing: a systematic review and critical appraisal of guidelines for chronic pain**. *Annals of internal medicine* 2014, **160**(1):38-47.
30. Deng Y, Luo L, Hu Y, Fang K, Liu J: **Clinical practice guidelines for the management of neuropathic pain: a systematic review**. *BMC anesthesiology* 2015, **16**(1):12.
31. Huang T-W, Lai J-H, Wu M-Y, Chen S-L, Wu C-H, Tam K-W: **Systematic review of clinical practice guidelines in the diagnosis and management of thyroid nodules and cancer**. *BMC medicine* 2013, **11**(1):191.

- 1  
2  
3  
4 32. Lopez-Olivo MA, Kallen MA, Ortiz Z, Skidmore B, Suarez-Almazor ME:  
5  
6 **Quality appraisal of clinical practice guidelines and consensus**  
7 **statements on the use of biologic agents in rheumatoid arthritis: a**  
8 **systematic review.** *Arthritis care & research* 2008, **59**(11):1625-1638.  
9  
10  
11  
12 33. Nagler EV, Vanmassenhove J, van der Veer SN, Nistor I, Van Biesen  
13 W, Webster AC, Vanholder R: **Diagnosis and treatment of**  
14 **hyponatremia: a systematic review of clinical practice guidelines**  
15 **and consensus statements.** *BMC medicine* 2014, **12**(1):231.  
16  
17  
18  
19 34. **AGREE II training tools. Accessed at**  
20 **<http://www.agreetrust.org-resource-centre-agree-ii-training-tooles/>**  
21 **on 01 August 2017.**  
22  
23  
24  
25 35. Brouwers MC, Kho ME, Browman GP, Burgers JS, Cluzeau F, Feder G,  
26 Fervers B, Graham ID, Hanna SE, Makarski J: **Development of the**  
27 **AGREE II, part 1: performance, usefulness and areas for**  
28 **improvement.** *Canadian Medical Association Journal* 2010,  
29 **182**(10):1045-1052.  
30  
31  
32  
33 36. Sivera F, Andres M, Carmona L, Kydd ASR, Moi J, Seth R,  
34 Sriranganathan M, Van Durme C, Van Echteld I, Vinik O *et al*:  
35 **Multinational evidence-based recommendations for the diagnosis**  
36 **and management of gout: Integrating systematic literature review**  
37 **and expert opinion of a broad panel of rheumatologists in the 3e**  
38 **initiative.** *Annals of the rheumatic diseases* 2014, **73**(2):328-335.  
39  
40  
41  
42 37. Chinese Society of Endocrinology. **Chinese consensus on the**  
43 **management of hyperuricemia and gout.** *Chin J Endocrinol Metab.*  
44 2013; **29**(11): 913-920 (Original document in Chinese).  
45  
46  
47  
48 38. Association TR: **Taiwan guideline for the management of gout and**  
49 **hyperuricemia - updated 2016.** *Formosan Journal of Rheumatology*  
50 2016, **30**:1-32.  
51  
52  
53  
54 39. Kiltz U, Smolen J, Bardin T, Cohen Solal A, Dalbeth N, Doherty M,  
55  
56  
57  
58  
59  
60

- 1  
2  
3  
4 Engel B, Flader C, Kay J, Matsuoka M *et al*: **Treat-to-target (T2T)**  
5 **recommendations for gout.** *Annals of the rheumatic diseases* 2016.  
6  
7  
8 40. Araujo F, Cordeiro I, Teixeira F, Rovisco J, Ramiro S, Mourao AF,  
9 Costa JA, Pimentao JB, Malcata A, Santos MJ *et al*: **Portuguese**  
10 **recommendations for the diagnosis and management of gout.** *Acta*  
11 *reumatologica portuguesa* 2014, **39**(2):158-171.  
12  
13  
14  
15 41. Chinese Rheumatology Association. **2016 Chinese guideline on the**  
16 **diagnosis and management of gout.** *Chin J Intern Med.* 2016: **55**(11):  
17 892-899 (Original document in Chinese).  
18  
19  
20  
21 42. Neogi T, Jansen TLTA, Dalbeth N, Fransen J, Schumacher HR,  
22 Berendsen D, Brown M, Choi H, Edwards NL, Janssens HJEM *et al*:  
23 **2015 Gout classification criteria: An American College of**  
24 **Rheumatology/European League Against Rheumatism**  
25 **collaborative initiative.** *Annals of the rheumatic diseases* 2015,  
26 **74**(10):1789-1798.  
27  
28  
29  
30  
31  
32  
33 43. Graf SW, Whittle SL, Wechalekar MD, Moi JHY, Barrett C, Hill CL,  
34 Littlejohn G, Lynch N, Major G, Taylor AL *et al*: **Australian and New**  
35 **Zealand recommendations for the diagnosis and management of**  
36 **gout: Integrating systematic literature review and expert opinion in**  
37 **the 3e Initiative.** *International journal of rheumatic diseases* 2015,  
38 **18**(3):341-351.  
39  
40  
41  
42  
43  
44 44. Federal Ministry of Health (Nigeria). **National nutritional guideline on**  
45 **non-communicable disease prevention, control and management.**  
46 Accessed at <http://www.health.gov.ng/doc/NutritionalGuideline.pdf> on  
47 28 July 2017.  
48  
49  
50  
51  
52 45. Manara M, Bortoluzzi A, Favero M, Prevete I, Scire CA, Bianchi G,  
53 Borghi C, Cimmino MA, D'Avola GM, Desideri G *et al*: **Italian Society**  
54 **of Rheumatology recommendations for the management of gout.**  
55 *Reumatismo* 2013, **65**(1):4-21.  
56  
57  
58  
59  
60 46. Spanish Society of Rheumatology (SER). **Clinical practice guidelines**

- 1  
2  
3  
4 **for management of gout.** Accessed at  
5 [https://www.ser.es/wp-content/uploads/2015/09/GuipClinGot\\_1140226](https://www.ser.es/wp-content/uploads/2015/09/GuipClinGot_1140226)  
6 [\\_EN.pdf](#) on 28 July 2017.  
7  
8
- 9  
10 47. Hu D, Ding R: **The diagnosis and treatment advice of**  
11 **cardiovascular disease combined asymptomatic hyperuricemia**  
12 **(second edition).** *Chinese Journal of Cardiovascular Research* 2012,  
13 **10(4):241-249.**  
14  
15  
16  
17 48. Yamanaka H: **Japanese guideline for the management of**  
18 **hyperuricemia and gout: second edition.** *Nucleosides, nucleotides &*  
19 *nucleic acids* 2011, **30(12):1018-1029.**  
20  
21  
22  
23 49. **Ministry of Health Malaysia (MOH). Management of gout.** Accessed  
24 **at <http://www.moh.gov.my/penerbitan/CPG2017/3893.pdf> on 28**  
25 **July 2017.**  
26  
27  
28  
29 50. Li-Yu J, Salido E, Manahan S, Lichauco J, Lorenzo J, Torralba K, Raso  
30 A, Roberto L, Santos EP, Maceda L: **Philippine clinical practice**  
31 **guidelines for the management of gout.** *International journal of*  
32 *rheumatic diseases* 2008, **11:A362.**  
33  
34  
35  
36  
37 51. Meyers OL, Cassim B, Mody GM: **Hyperuricaemia and gout: clinical**  
38 **guideline 2003.** *South African medical journal = Suid-Afrikaanse*  
39 *tydskrif vir geneeskunde* 2003, **93(12 Pt 2):961-971.**  
40  
41  
42  
43 52. The University of Texas at Austin, School of Nursing, Family Nurse  
44 Practitioner Program. **Management of initial gout in adults.** Accessed  
45 **at**  
46 **[http://www.alabmed.com/uploadfile/2014/0515/20140515070230703.p](http://www.alabmed.com/uploadfile/2014/0515/20140515070230703.pdf)**  
47 **df on 25 July 2017.**  
48  
49  
50  
51  
52 53. Shekelle PG, Woolf SH, Eccles M, Grimshaw J: **Developing**  
53 **guidelines.** *BMJ (Clinical research ed)* 1999, **318(7183):593-596.**  
54  
55  
56 54. Multidisciplinary Expert Task Force on Hyperuricemia and Related  
57 Diseases: **Chinese Multidisciplinary Expert Consensus on the**  
58 **Diagnosis and Treatment of Hyperuricemia and Related Diseases.**  
59  
60



- 1  
2  
3  
4  
5  
6  
7  
8  
9  
10  
11  
12  
13  
14  
15  
16  
17  
18  
19  
20  
21  
22  
23  
24  
25  
26  
27  
28  
29  
30  
31  
32  
33  
34  
35  
36  
37  
38  
39  
40  
41  
42  
43  
44  
45  
46  
47  
48  
49  
50  
51  
52  
53  
54  
55  
56  
57  
58  
59  
60
- Chin Med J (Engl)* 2017, **130**(20):2473-2488.
55. Yu KH, Chen DY, Chen JH, Chen SY, Chen SM, Cheng TT, Hsieh SC, Hsieh TY, Hsu PF, Kuo CF, et al: **Management of gout and hyperuricemia: Multidisciplinary consensus in Taiwan.** *Int J Rheum Dis* 2018, **21**(4):772-787.
56. Nuki G: **An appraisal of the 2012 American College of Rheumatology Guidelines for the Management of Gout.** *Current opinion in rheumatology* 2014, **26**(2):152-161.
57. Wang D, Yu Y, Chen Y, Yang N, Zhang H, Wang C, Wang Q, Wang X, Zeng X, Estill J: **Assessing the Quality of Global Clinical Practice Guidelines on Gout Using AGREE II Instrument.** *J Clin Rheumatol* 2018.
58. Zhang W, Doherty M, Bardin T, Pascual E, Barskova V, Conaghan P, Gerster J, Jacobs J, Leeb B, Liote F *et al*: **EULAR evidence based recommendations for gout. Part II: Management. Report of a task force of the EULAR Standing Committee for International Clinical Studies Including Therapeutics (ESCSIT).** *Annals of the rheumatic diseases* 2006, **65**(10):1312-1324.
59. Holmer HK, Ogden LA, Burda BU, Norris SL: **Quality of clinical practice guidelines for glycemic control in type 2 diabetes mellitus.** *PloS one* 2013, **8**(4):e58625.
60. Wu CM, Wu AM, Young BK, Wu DJ, Margo CE, Greenberg PB: **An appraisal of clinical practice guidelines for diabetic retinopathy.** *American Journal of Medical Quality* 2016, **31**(4):370-375.
61. Fang Y, Yao L, Sun J, Zhang J, Li Y, Yang R, Yang K, Tian L: **Appraisal of clinical practice guidelines on the management of hypothyroidism in pregnancy using the Appraisal of Guidelines for Research and Evaluation II instrument.** *Endocrine* 2018:1-11.
62. Hazlewood GS, Akhavan P, Schieir O, Marshall D, Tomlinson G, Bykerk V, Bombardier C: **Adding a “GRADE” to the quality appraisal**

- 1  
2  
3  
4 **of rheumatoid arthritis guidelines identifies limitations beyond**  
5 **AGREE-II.** *Journal of clinical epidemiology* 2014, **67**(11):1274-1285.
- 6  
7  
8 63. Palmowski Y, Buttgereit T, Dejaco C, Bijlsma JW, Matteson EL,  
9 Voshaar M, Boers M, Buttgereit F: **“Official View” on Glucocorticoids**  
10 **in Rheumatoid Arthritis: A Systematic Review of International**  
11 **Guidelines and Consensus Statements.** *Arthritis care & research*  
12 2017, **69**(8):1134-1141.
- 13  
14  
15  
16  
17  
18 64. Tunnicliffe DJ, Singh-Grewal D, Kim S, Craig JC, Tong A: **Diagnosis,**  
19 **monitoring, and treatment of systemic lupus erythematosus: a**  
20 **systematic review of clinical practice guidelines.** *Arthritis care &*  
21 *research* 2015, **67**(10):1440-1452.
- 22  
23  
24  
25  
26 65. Alonso-Coello P, Irfan A, Solà I, Gich I, Delgado-Noguera M, Rigau D,  
27 Tort S, Bonfill X, Burgers J, Schunemann H: **The quality of clinical**  
28 **practice guidelines over the last two decades: a systematic review**  
29 **of guideline appraisal studies.** *Qual Saf Health Care* 2010,  
30 **19**(6):e58-e58.
- 31  
32  
33  
34  
35  
36 66. Devroey D, Vantomme K, Betz W, Vandevoorde J, Kartounian J: **A**  
37 **review of the treatment guidelines on the management of low**  
38 **levels of high-density lipoprotein cholesterol.** *Cardiology* 2004,  
39 **102**(2):61-66.
- 40  
41  
42  
43 67. Gavriilidis P, Roberts KJ, Askari A, Sutcliffe RP, Liu P-H, Hidalgo E,  
44 Compagnon P, Lim C, Azoulay D: **Evaluation of the current**  
45 **guidelines for resection of hepatocellular carcinoma using the**  
46 **Appraisal of Guidelines for Research and Evaluation II instrument.**  
47 *Journal of hepatology* 2017, **67**(5):991-998.
- 48  
49  
50  
51  
52  
53 68. Jutkowitz E, Dubreuil M, Lu N, Kuntz KM, Choi HK: **The**  
54 **cost-effectiveness of HLA-B\*5801 screening to guide initial**  
55 **urate-lowering therapy for gout in the United States.** *Semin Arthritis*  
56 *Rheum* 2017, **46**(5):594-600.
- 57  
58  
59  
60

- 1  
2  
3  
4  
5  
6  
7  
8  
9  
10  
11  
12  
13  
14  
15  
16  
17  
18  
19  
20  
21  
22  
23  
24  
25  
26  
27  
28  
29  
30  
31  
32  
33  
34  
35  
36  
37  
38  
39  
40  
41  
42  
43  
44  
45  
46  
47  
48  
49  
50  
51  
52  
53  
54  
55  
56  
57  
58  
59  
60
69. Plumpton CO, Alfirevic A, Pirmohamed M, Hughes DA: **Cost effectiveness analysis of HLA-B\*58:01 genotyping prior to initiation of allopurinol for gout.** *Rheumatology (Oxford)* 2017, **56**(10):1729-1739.
70. Li T, Vedula SS, Scherer R, Dickersin K: **What comparative effectiveness research is needed? A framework for using guidelines and systematic reviews to identify evidence gaps and research priorities.** *Annals of internal medicine* 2012, **156**(5):367-377.
71. Brosseau L, Rahman P, Poitras S, Toupin-April K, Paterson G, Smith C, King J, Casimiro L, De Angelis G, Loew L: **A systematic critical appraisal of non-pharmacological management of rheumatoid arthritis with appraisal of guidelines for research and evaluation II.** *PloS one* 2014, **9**(5):e95369.
72. Watine J, Friedberg B, Nagy E, Onody R, Oosterhuis W, Bunting PS, Charet J-C, Horvath AR: **Conflict between guideline methodologic quality and recommendation validity: a potential problem for practitioners.** *Clinical chemistry* 2006, **52**(1):65-72.

## TABLES AND FIGURES

**Table 1. Characteristics of included guidelines and consensus statements**

3e: Evidence, Expertise, Exchange; ACP: American College of Physicians; ACR: American College of Rheumatology; AMM: Academy of Medicine of Malaysia; ASCR: American Society of Clinical Rheumatologists; CS: consensus statement; CVD: cardiovascular diseases; ER: external review; EULAR: European League Against Rheumatism; LOE: level of evidence; MOH: Ministry of Health Malaysia; MSR: Malaysian Society of Rheumatology; Multi: multidisciplinary development group; NG: not given; NIAMS: National Institute of Arthritis and Musculoskeletal and Skin Diseases; NIH: National Institutes of Health; Phy: physicians; Pt: patients; Rheu: rheumatologists; SLR: systematic literature review; SOR: strength of recommendation.

| Document                     | Issuing organization                | Year of publication | Country      | Funding body                  | Target population       | Target audience | Guideline development | Guideline review | Guideline update    | Evidence base | LOE | SOR |
|------------------------------|-------------------------------------|---------------------|--------------|-------------------------------|-------------------------|-----------------|-----------------------|------------------|---------------------|---------------|-----|-----|
| <b>Guidelines</b>            |                                     |                     |              |                               |                         |                 |                       |                  |                     |               |     |     |
| <b>SAMA_2003 [51]</b>        | South African Medical Association   | 2003                | South Africa | Pharmaceutical company        | Gout                    | Phy             | Multi                 | ER               | Intermittent        | NG            | -   | -   |
| <b>EULAR_2006 [18]</b>       | EULAR                               | 2006                | Europe       | EULAR                         | Gout                    | NG              | Rheu                  | NG               | NG                  | SLR           | +   | +   |
| <b>MOH_MSR_AMM_2008 [49]</b> | MOH, MSR, AMM                       | 2008                | Malaysia     | Pharmaceutical company        | Adults (>16y) with gout | Phy             | Multi                 | ER               | 2012 or sooner      | SLR           | +   | +   |
| <b>PRA_2008 [50]</b>         | Philippine Rheumatology Association | 2008                | Philippine   | NG                            | Gout                    | Phy             | NG                    | NG               | Three or more years | SLR           | +   | +   |
| <b>UTAustin_2009 [52]</b>    | University of Texas at Austin       | 2009                | US           | University of Texas at Austin | Adults with gout        | Phy             | NG                    | ER               | NG                  | SLR           | +   | +   |
| <b>EULAR_2011 [17]</b>       | EULAR                               | 2011                | Multination  | Pharmaceutical company, ASCR  | Gout                    | Phy             | Multi                 | NG               | NG                  | SLR           | +   | +   |

|                             |                                                      |      |               |                        |                                     |                     |       |    |                 |     |   |   |
|-----------------------------|------------------------------------------------------|------|---------------|------------------------|-------------------------------------|---------------------|-------|----|-----------------|-----|---|---|
| <b>JSGNAM_2011 [48]</b>     | Japanese Society of Gout and Nucleic Acid Metabolism | 2011 | Japan         | NG                     | Hyperuricemia or gout               | NG                  | NG    | ER | NG              | SLR | + | + |
| <b>ACR_2012 [14, 15]</b>    | ACR                                                  | 2012 | US            | ACR, NIAMS, NIH        | Gout                                | Phy                 | Multi | NG | Intermittent    | SLR | + | - |
| <b>SER_2013 [46]</b>        | Spanish Society of Rheumatology                      | 2013 | Spain         | Pharmaceutical company | Gout                                | Phy                 | Multi | ER | Four years      | SLR | + | + |
| <b>SIR_2013 [45]</b>        | Italian Society of Rheumatology                      | 2013 | Italy         | NG                     | Gout                                | Phy                 | Multi | NG | NG              | SLR | + | + |
| <b>FMOH_2014 [44]</b>       | Federal Ministry of Health (Nigeria)                 | 2014 | Nigeria       | NG                     | Gout                                | Phy, Pts in Nigeria | Multi | NG | NG              | NG  | - | - |
| <b>CRA_2016 [41]</b>        | Chinese Rheumatology Association                     | 2016 | China         | NG                     | Gout in China                       | Phy                 | Multi | NG | NG              | SLR | + | + |
| <b>EULAR_2016 [16]</b>      | EULAR                                                | 2016 | Europe        | NG                     | Gout                                | Phy, Pts            | Multi | ER | Intermittent    | SLR | + | + |
| <b>TRA_2016 [38]</b>        | Taiwan Rheumatology Association                      | 2016 | Taiwan, China | NG                     | Hyperuricemia or gout               | Phy, Pts            | Multi | NG | NG              | NG  | - | - |
| <b>ACP_2017 [19, 20]</b>    | ACP                                                  | 2017 | US            | ACP                    | Acute and recurrent gout            | Phy                 | NG    | ER | Five years      | SLR | + | + |
| <b>BSR_2017 [21]</b>        | The British Society for Rheumatology                 | 2017 | UK            | No specific funding.   | Gout in the UK                      | Phy                 | Multi | ER | Planned in 2020 | SLR | + | + |
| <b>Consensus statements</b> |                                                      |      |               |                        |                                     |                     |       |    |                 |     |   |   |
| <b>CCCP_2012 [47]</b>       | Chinese College of Cardiovascular Physicians         | 2012 | China         | NG                     | Asymptomatic hyperuricemia with CVD | NG                  | NG    | NG | NG              | CS  | - | - |
| <b>3e_2013 [36]</b>         | 3e Initiative                                        | 2013 | Multination   | Pharmaceutical company | Gout                                | NG                  | Rheu  | NG | NG              | SLR | + | + |
| <b>CSE_2013 [37]</b>        | Chinese Society of Endocrinology                     | 2013 | China         | NG                     | Hyperuricemia or gout               | NG                  | NG    | NG | NG              | CS  | - | - |
| <b>3e_PT_2014 [40]</b>      | Portuguese 3e Initiative                             | 2014 | Portugal      | NG                     | Gout in Portuguese                  | NG                  | Rheu  | NG | NG              | SLR | + | + |
| <b>3e_AU_NZ_2015 [43]</b>   | Australian and New Zealand 3e Initiative             | 2015 | Multination   | NG                     | Gout                                | NG                  | Rheu  | NG | NG              | SLR | + | + |

1  
2  
3  
4  
5  
6  
7  
8  
9  
10  
11  
12  
13  
14  
15  
16  
17  
18  
19  
20  
21  
22  
23  
24  
25  
26  
27  
28  
29  
30  
31  
32  
33  
34  
35  
36  
37  
38  
39  
40  
41  
42  
43  
44  
45  
46

|                            |                                                                                        |      |             |                        |               |     |       |    |              |     |   |   |
|----------------------------|----------------------------------------------------------------------------------------|------|-------------|------------------------|---------------|-----|-------|----|--------------|-----|---|---|
| <b>ACR_EULAR_2015 [42]</b> | ACR/EULAR                                                                              | 2015 | Multination | ACR, EULAR             | Gout          | NG  | NG    | ER | Intermittent | SLR | - | - |
| <b>T2T_2016 [39]</b>       | NG                                                                                     | 2016 | Multination | Pharmaceutical company | Gout          | NG  | Rheu  | ER | NG           | SLR | + | + |
| <b>CRA_multi_2017 [22]</b> | Chinese multi-disciplinary expert task force on hyperuricemia and its related diseases | 2017 | China       | NG                     | Hyperuricemia | Phy | Multi | NG | NG           | CS  | - | - |

1  
2  
3  
4  
5 **Figure 1. Flow diagram for literature search**

6 NGC, National Guideline Clearinghouse; GIN, Guidelines International Network; NICE, National Institute for Health and Care  
7 Excellence; NHS, National Health Service; SIGN, Scottish Intercollegiate Guidelines Network; GAIN, Guidelines and Audit  
8 Implementation Network; TRIP, Turning Research Into Practice Database; CBM, Chinese Biomedical Literature Database.  
9  
10  
11  
12  
13  
14  
15  
16  
17  
18  
19  
20  
21  
22  
23  
24  
25  
26  
27  
28  
29  
30  
31  
32  
33  
34  
35  
36  
37  
38  
39  
40  
41  
42  
43  
44  
45  
46

For peer review only

**Figure 2. Standardized domain scores for each guidance document**

3e: Evidence, Expertise, Exchange Initiative; 3e\_AU\_NZ: Australian and New Zealand 3e Initiative; 3e\_PT: Portuguese 3e Initiative; ACP: American College of Physicians; ACR: American College of Rheumatology; AMM: Academy of Medicine of Malaysia; ASCR: American Society of Clinical Rheumatologists; BSR: British Society for Rheumatology; CCCP: Chinese College of Cardiovascular Physicians; CRA: Chinese Rheumatology Association; CRA\_multi: Chinese multi-disciplinary expert task force on hyperuricemia and its related diseases; CSE: Chinese Society of Endocrinology; EULAR: European League Against Rheumatism; FMOH: Federal Ministry of Health (Nigeria); IQR: interquartile range; JSGNAM: Japanese Society of Gout and Nucleic Acid Metabolism; MOH: Ministry of Health Malaysia; MSR: Malaysian Society of Rheumatology; NIAMS: National Institute of Arthritis and Musculoskeletal and Skin Diseases; NIH: National Institutes of Health; PRA: Philippine Rheumatology Association; SAMA: South African Medical Association; SER: Spanish Society of Rheumatology; SIR: Italian Society of Rheumatology; T2T: Treat-to-target recommendations; TRA: Taiwan Rheumatology Association; UTAustin: University of Texas at Austin.



### Figure 3. Summary of key recommendations for the diagnosis and treatment of gout and hyperuricemia

3e: Evidence, Expertise, Exchange Initiative; 3e\_AU\_NZ: Australian and New Zealand 3e Initiative; 3e\_PT: Portuguese 3e Initiative; ACP: American College of Physicians; ACR: American College of Rheumatology; AMM: Academy of Medicine of Malaysia; ASCR: American Society of Clinical Rheumatologists; BSR: British Society for Rheumatology; CCCP: Chinese College of Cardiovascular Physicians; CRA: Chinese Rheumatology Association; CRA\_multi: Chinese multi-disciplinary expert task force on hyperuricemia and its related diseases; CSE: Chinese Society of Endocrinology; EULAR: European League Against Rheumatism; FMOH: Federal Ministry of Health (Nigeria); JSGNAM: Japanese Society of Gout and Nucleic Acid Metabolism; MOH: Ministry of Health Malaysia; MSR: Malaysian Society of Rheumatology; NIAMS: National Institute of Arthritis and Musculoskeletal and Skin Diseases; NIH: National Institutes of Health; PRA: Philippine Rheumatology Association; SAMA: South African Medical Association; SER: Spanish Society of Rheumatology; SIR: Italian Society of Rheumatology; SUA: serum uric acid; T2T: Treat-to-target recommendations; TRA: Taiwan Rheumatology Association; UTAustin: University of Texas at Austin.

### Figure 1 Flow diagram for literature search

NGC, National Guideline Clearinghouse; GIN, Guidelines International Network; NICE, National Institute for Health and Care Excellence; NHS, National Health Service; SIGN, Scottish Intercollegiate Guidelines Network; GAIN, Guidelines and Audit Implementation Network; TRIP, Turning Research Into Practice Database; CBM, Chinese Biomedical Literature Database.



From: Moher D, Liberati A, Tetzlaff J, Altman DG, The PRISMA Group (2009). Preferred Reporting Items for Systematic Reviews and Meta-Analyses: The PRISMA Statement. PLoS Med 6(7): e1000097. doi:10.1371/journal.pmed1000097

For more information, visit [www.prisma-statement.org](http://www.prisma-statement.org).

For peer review only - <http://bmjopen.bmj.com/site/about/guidelines.xhtml>

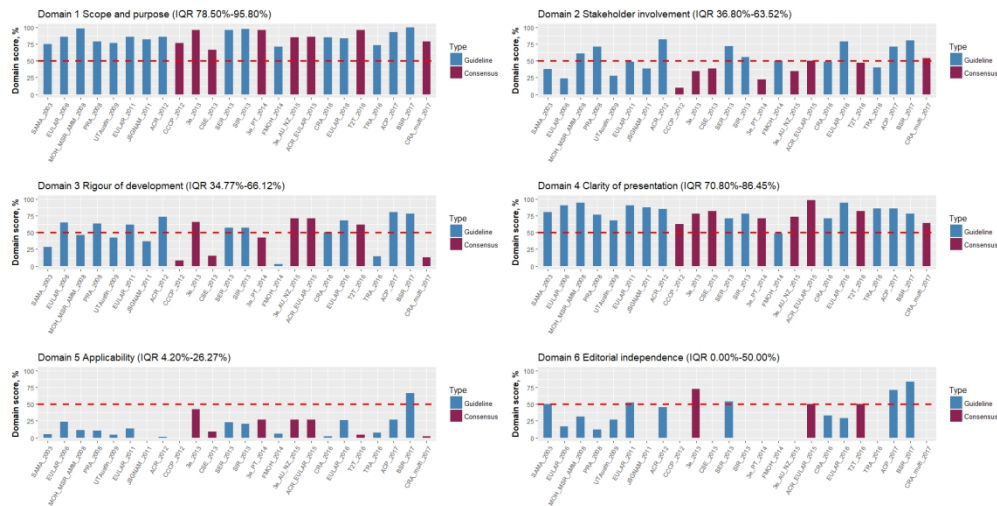

Figure 2. Standardized domain scores for each guidance document3e: Evidence, Expertise, Exchange Initiative; 3e\_AU\_NZ: Australian and New Zealand 3e Initiative; 3e\_PT: Portuguese 3e Initiative; ACP: American College of Physicians; ACR: American College of Rheumatology; AMM: Academy of Medicine of Malaysia; ASCR: American Society of Clinical Rheumatologists; BSR: British Society for Rheumatology; CCCP: Chinese College of Cardiovascular Physicians; CRA: Chinese Rheumatology Association; CRA\_multi: Chinese multi-disciplinary expert task force on hyperuricemia and its related diseases; CSE: Chinese Society of Endocrinology; EULAR: European League Against Rheumatism; FMOH: Federal Ministry of Health (Nigeria); IQR: interquartile range; JSGNAM: Japanese Society of Gout and Nucleic Acid Metabolism; MOH: Ministry of Health Malaysia; MSR: Malaysian Society of Rheumatology; NIAMS: National Institute of Arthritis and Musculoskeletal and Skin Diseases; NIH: National Institutes of Health; PRA: Philippine Rheumatology Association; SAMA: South African Medical Association; SER: Spanish Society of Rheumatology; SIR: Italian Society of Rheumatology; T2T: Treat-to-target recommendations; TRA: Taiwan Rheumatology Association; UTAustin: University of Texas at Austin.

|                                                                                    | Reference Contents                                  | SAMA_2003 (51)<br>EULAR_2006 (18)<br>MOH_MSR_AMM_2008 (49)<br>PRA_2008 (59)<br>UTAustin_2009 (52)<br>EULAR_2011 (17)<br>JSGNAM_2011 (48)<br>ACR_2012 (14,15)<br>CCCP_2012 (47)<br>3e_2013 (86)<br>CSE_2013 (37)<br>SER_2013 (46)<br>SIR_2013 (45)<br>3e_PT_2014 (40)<br>FMOH_2014 (44)<br>3e_AU_NZ_2015 (43)<br>ACR_EULAR_2015 (42)<br>CRA_2016 (41)<br>EULAR_2016 (16)<br>T2T_2016 (39)<br>TRA_2016 (38)<br>ACP_2017 (19,20)<br>BSR_2017 (21)<br>CRA_multi_2017 (22) |
|------------------------------------------------------------------------------------|-----------------------------------------------------|-----------------------------------------------------------------------------------------------------------------------------------------------------------------------------------------------------------------------------------------------------------------------------------------------------------------------------------------------------------------------------------------------------------------------------------------------------------------------|
| <b>Diagnosis and Monitoring</b>                                                    |                                                     |                                                                                                                                                                                                                                                                                                                                                                                                                                                                       |
| Definition of gout                                                                 | Provided                                            |                                                                                                                                                                                                                                                                                                                                                                                                                                                                       |
| _Clinical manifestations                                                           | Yes                                                 |                                                                                                                                                                                                                                                                                                                                                                                                                                                                       |
| _Laboratory results                                                                | Yes                                                 |                                                                                                                                                                                                                                                                                                                                                                                                                                                                       |
| _Imaging results                                                                   | Yes                                                 |                                                                                                                                                                                                                                                                                                                                                                                                                                                                       |
| _MSU crystal detection as definitive diagnosis                                     | Yes                                                 |                                                                                                                                                                                                                                                                                                                                                                                                                                                                       |
| _Is urate deposits clearance monitored by imaging?                                 | No                                                  |                                                                                                                                                                                                                                                                                                                                                                                                                                                                       |
| _Is the timing to assess urate deposits with imaging techniques provided?          | No                                                  |                                                                                                                                                                                                                                                                                                                                                                                                                                                                       |
| _Is SUA cut-off provided for hyperuricemia?                                        | Yes                                                 |                                                                                                                                                                                                                                                                                                                                                                                                                                                                       |
| _All gender                                                                        | 420 µmol/L or 7.0 mg/dL                             |                                                                                                                                                                                                                                                                                                                                                                                                                                                                       |
| _Female                                                                            | 360 µmol/L or 6.0 mg/dL                             |                                                                                                                                                                                                                                                                                                                                                                                                                                                                       |
| _Male                                                                              | 420 µmol/L or 7.0 mg/dL                             |                                                                                                                                                                                                                                                                                                                                                                                                                                                                       |
| _Definition of asymptomatic hyperuricemia                                          | Provided                                            |                                                                                                                                                                                                                                                                                                                                                                                                                                                                       |
| _Gout flare                                                                        | Yes                                                 |                                                                                                                                                                                                                                                                                                                                                                                                                                                                       |
| _Tophi                                                                             | No                                                  |                                                                                                                                                                                                                                                                                                                                                                                                                                                                       |
| _Other medical conditions                                                          | Yes                                                 |                                                                                                                                                                                                                                                                                                                                                                                                                                                                       |
| <b>Treatment for Hyperuricemia</b>                                                 |                                                     |                                                                                                                                                                                                                                                                                                                                                                                                                                                                       |
| _Is upper limit for the target SUA provided?                                       | Yes                                                 |                                                                                                                                                                                                                                                                                                                                                                                                                                                                       |
| _General target                                                                    | 360 µmol/L or 6.0 mg/dL                             |                                                                                                                                                                                                                                                                                                                                                                                                                                                                       |
| _Target for serve cases                                                            | 300 µmol/L or 5.0 mg/dL                             |                                                                                                                                                                                                                                                                                                                                                                                                                                                                       |
| _Lower limit for the target SUA                                                    | 180 µmol/L or 3.0 mg/dL                             |                                                                                                                                                                                                                                                                                                                                                                                                                                                                       |
| _Is drinking water explicitly recommended as a treatment?                          | Yes                                                 |                                                                                                                                                                                                                                                                                                                                                                                                                                                                       |
| _Is urine alkalization recommended?                                                | Yes                                                 |                                                                                                                                                                                                                                                                                                                                                                                                                                                                       |
| _Indications for ULT                                                               | Yes                                                 |                                                                                                                                                                                                                                                                                                                                                                                                                                                                       |
| _Recurrent attacks                                                                 | Yes                                                 |                                                                                                                                                                                                                                                                                                                                                                                                                                                                       |
| _Tophi                                                                             | Yes                                                 |                                                                                                                                                                                                                                                                                                                                                                                                                                                                       |
| _Urate nephrolithiasis                                                             | Yes                                                 |                                                                                                                                                                                                                                                                                                                                                                                                                                                                       |
| _Arthropathy                                                                       | Yes                                                 |                                                                                                                                                                                                                                                                                                                                                                                                                                                                       |
| _Comodities                                                                        | Yes                                                 |                                                                                                                                                                                                                                                                                                                                                                                                                                                                       |
| _Others                                                                            | Yes                                                 |                                                                                                                                                                                                                                                                                                                                                                                                                                                                       |
| _Should ULT be initiated during or after an acute attack?                          | After an attack                                     |                                                                                                                                                                                                                                                                                                                                                                                                                                                                       |
| _What is the first line ULT drug option?                                           | Allopurinol                                         |                                                                                                                                                                                                                                                                                                                                                                                                                                                                       |
| _What is the second line ULT drug option?                                          | Febuxostat or probenecid                            |                                                                                                                                                                                                                                                                                                                                                                                                                                                                       |
| _What is the maximum daily dose of allopurinol recommended?                        | 600 mg                                              |                                                                                                                                                                                                                                                                                                                                                                                                                                                                       |
| _What is the cut off for renal function to initiate allopurinol dose adjustment?   | eGFR 130 ml/min/1.73m <sup>2</sup>                  |                                                                                                                                                                                                                                                                                                                                                                                                                                                                       |
| _What is the starting dose for allopurinol in patients with normal renal function? | 100 mg                                              |                                                                                                                                                                                                                                                                                                                                                                                                                                                                       |
| _Is HLA-B*5801 gene screening recommended for allopurinol use?                     | No                                                  |                                                                                                                                                                                                                                                                                                                                                                                                                                                                       |
| _Should prophylaxis be given with ULT?                                             | Yes                                                 |                                                                                                                                                                                                                                                                                                                                                                                                                                                                       |
| _Should prophylaxis be given before initiating ULT?                                | Yes                                                 |                                                                                                                                                                                                                                                                                                                                                                                                                                                                       |
| _What is the duration for prophylaxis?                                             | 3-6 months                                          |                                                                                                                                                                                                                                                                                                                                                                                                                                                                       |
| _Is pharmacological ULT recommended for asymptomatic hyperuricemia?                | No                                                  |                                                                                                                                                                                                                                                                                                                                                                                                                                                                       |
| _Are comorbidities considered?                                                     | Yes                                                 |                                                                                                                                                                                                                                                                                                                                                                                                                                                                       |
| _What is the SUA cut-off?                                                          | 8.0-9.0 mg/dL                                       |                                                                                                                                                                                                                                                                                                                                                                                                                                                                       |
| <b>Treatment for Acute Attack</b>                                                  |                                                     |                                                                                                                                                                                                                                                                                                                                                                                                                                                                       |
| _First line pharmacological treatment option                                       | Provided                                            |                                                                                                                                                                                                                                                                                                                                                                                                                                                                       |
| _NSAIDs                                                                            | Yes                                                 |                                                                                                                                                                                                                                                                                                                                                                                                                                                                       |
| _Colchicine                                                                        | Yes                                                 |                                                                                                                                                                                                                                                                                                                                                                                                                                                                       |
| _Steroids                                                                          | No                                                  |                                                                                                                                                                                                                                                                                                                                                                                                                                                                       |
| _What is the dosage of colchicine recommended?                                     | 1.2 mg loading dose followed by 0.6 mg 1 hour later |                                                                                                                                                                                                                                                                                                                                                                                                                                                                       |
| _Is intra-articular steroids recommended?                                          | Yes                                                 |                                                                                                                                                                                                                                                                                                                                                                                                                                                                       |
| _Indications for intra-articular steroids                                          | Provided                                            |                                                                                                                                                                                                                                                                                                                                                                                                                                                                       |
| _Involvement of 1-2 major joints                                                   | Yes                                                 |                                                                                                                                                                                                                                                                                                                                                                                                                                                                       |
| _Contraindicated to NSAIDs or colchicine                                           | Yes                                                 |                                                                                                                                                                                                                                                                                                                                                                                                                                                                       |
| _Which line of option is intra-articular steroids recommended to be?               | First                                               |                                                                                                                                                                                                                                                                                                                                                                                                                                                                       |
| _Is systemic steroids recommended?                                                 | Yes                                                 |                                                                                                                                                                                                                                                                                                                                                                                                                                                                       |
| _What are the indications for systemic steroids?                                   | Contraindicated to colchicine or NSAIDs.            |                                                                                                                                                                                                                                                                                                                                                                                                                                                                       |
| _Which line of option is systemic steroids recommended to be?                      | First                                               |                                                                                                                                                                                                                                                                                                                                                                                                                                                                       |
| <b>Treatment for Tophi</b>                                                         |                                                     |                                                                                                                                                                                                                                                                                                                                                                                                                                                                       |
| _Is surgery recommended?                                                           | Yes                                                 |                                                                                                                                                                                                                                                                                                                                                                                                                                                                       |
| _Indications for surgery                                                           | Provided                                            |                                                                                                                                                                                                                                                                                                                                                                                                                                                                       |
| _Nerve compression                                                                 | Yes                                                 |                                                                                                                                                                                                                                                                                                                                                                                                                                                                       |
| _Infection                                                                         | Yes                                                 |                                                                                                                                                                                                                                                                                                                                                                                                                                                                       |
| _Mechanical impingement                                                            | Yes                                                 |                                                                                                                                                                                                                                                                                                                                                                                                                                                                       |
| _Loss of mobility                                                                  | No                                                  |                                                                                                                                                                                                                                                                                                                                                                                                                                                                       |
| _Severe pain                                                                       | No                                                  |                                                                                                                                                                                                                                                                                                                                                                                                                                                                       |
| _Tophaceous ulcer                                                                  | No                                                  |                                                                                                                                                                                                                                                                                                                                                                                                                                                                       |
| _Others                                                                            | Yes                                                 |                                                                                                                                                                                                                                                                                                                                                                                                                                                                       |
| _What are the risks of surgery?                                                    | Wound healing                                       |                                                                                                                                                                                                                                                                                                                                                                                                                                                                       |
| _Is long-term serum urate lowering treatment recommended?                          | Yes                                                 |                                                                                                                                                                                                                                                                                                                                                                                                                                                                       |
| _Is any pharmacological treatment explicitly recommended?                          | Pegloticase                                         |                                                                                                                                                                                                                                                                                                                                                                                                                                                                       |

■ Consistent with the reference content  
■ Inconsistent with the reference content  
■ Partially consistent with the reference content  
■ Not given  
■ Not applicable

Figure 3. Summary of key recommendations for the diagnosis and treatment of gout and hyperuricemia  
3e: Evidence, Expertise, Exchange Initiative; 3e\_AU\_NZ: Australian and New Zealand 3e Initiative; 3e\_PT: Portuguese 3e Initiative; ACP: American College of Physicians; ACR: American College of Rheumatology; AMM: Academy of Medicine of Malaysia; ASCR: American Society of Clinical Rheumatologists; BSR: British Society for Rheumatology; CCCP: Chinese College of Cardiovascular Physicians; CRA: Chinese Rheumatology Association; CRA\_multi: Chinese multi-disciplinary expert task force on hyperuricemia and its related diseases; CSE: Chinese Society of Endocrinology; EULAR: European League Against Rheumatism; FMOH: Federal Ministry of Health (Nigeria); JSGNAM: Japanese Society of Gout and Nucleic Acid Metabolism; MOH: Ministry of Health Malaysia; MSR: Malaysian Society of Rheumatology; NIAMS: National Institute of Arthritis and Musculoskeletal and Skin Diseases; NIH: National Institutes of Health; PRA: Philippine Rheumatology Association; SAMA: South African Medical Association; SER: Spanish Society of Rheumatology; SIR: Italian Society of Rheumatology; SUA: serum uric acid; T2T: Treat-to-target recommendations; TRA: Taiwan Rheumatology Association; UTAustin: University of Texas at Austin.

## Supplementary Materials

Contents

Supplementary Table 1. Search strategy in PubMed

Supplementary Table 2. Search strategy in EMBASE using the OVID interface

Supplementary Table 3. Searches in guideline databases

Supplementary Table 4. Excluded studies and reasons for exclusion

Supplementary Table 5. Domain score for each included guidance document

Supplementary Table 6. Mean scores across reviewers for the individual AGREE II domain items

Supplementary Table 7. Scores for each individual AGREE II domain items by each reviewer

Supplementary Table 8. Summary of recommendations for the diagnosis of gout and hyperuricemia by included guidance documents

Supplementary Table 9. Summary of recommendations for the treatment of hyperuricemia by included guidance documents

Supplementary Table 10. Summary of recommendations for the treatment of acute gout by included guidance documents

Supplementary Table 11. Summary of recommendations for the treatment of tophi by included guidance documents

Supplementary Figure 1. Standardized domain scores by the year of publication

Supplementary File 1. Instructions for Guideline Appraisal Using the AGREE II Instrument

**Supplementary Table 1. Search strategy in PubMed**

|   |                                                                                           |
|---|-------------------------------------------------------------------------------------------|
| 1 | urate* OR uric acid OR gout OR hyperuricemia OR hyperuricaemia                            |
| 2 | guideline OR guideline* OR consensus OR policy OR polic* OR statement* OR recommendation* |
| 3 | 1 AND 2                                                                                   |

For peer review only

**Supplementary Table 2. Search strategy in EMBASE using the OVID interface**

|    |                                        |
|----|----------------------------------------|
| 1  | exp hyperuricemia/                     |
| 2  | exp gout/                              |
| 3  | exp uric acid/                         |
| 4  | exp urate/                             |
| 5  | gout.m_titl.                           |
| 6  | uric acid.m_titl.                      |
| 7  | urate\$.m_titl.                        |
| 8  | hyperuric?emia.m_titl.                 |
| 9  | 1 or 2 or 3 or 4 or 5 or 6 or 7 or 8   |
| 10 | exp practice guideline/                |
| 11 | guideline\$.m_titl.                    |
| 12 | consensus.m_titl.                      |
| 13 | position statement\$.m_titl.           |
| 14 | exp health care policy/ or exp policy/ |
| 15 | recommendation\$.m_titl.               |
| 16 | 10 or 11 or 12 or 13 or 14 or 15       |
| 17 | 9 and 16                               |

**Supplementary Table 3. Searches in guideline databases**

| Databases                                         | Date of search | Search strategy                                                                                                        | Results found | Full text screened | Included documents | URL                                                                                        |
|---------------------------------------------------|----------------|------------------------------------------------------------------------------------------------------------------------|---------------|--------------------|--------------------|--------------------------------------------------------------------------------------------|
| National Guideline Clearinghouse                  | 2017/07/24     | hyperuricaemia OR hyperuricemia OR gout                                                                                | 27            | 6                  | 4                  | <a href="http://www.guideline.gov">www.guideline.gov</a>                                   |
| Guidelines International Network                  | 2017/07/24     | hyperuricaemia OR hyperuricemia OR gout, Search mode: Guidelines                                                       | 11            | 5                  | 5                  | <a href="http://www.g-i-n.net">www.g-i-n.net</a>                                           |
| National Institute for Health and Care Excellence | 2017/07/24     | hyperuricaemia OR hyperuricemia OR gout                                                                                | 25            | 2                  | 0                  | <a href="http://www.nice.org.uk">www.nice.org.uk</a>                                       |
| National Health Service                           | 2017/07/24     | hyperuricaemia OR hyperuricemia OR gout, filter type: guidance and policy                                              | 498           | 5                  | 3                  | <a href="http://www.evidence.nhs.uk">www.evidence.nhs.uk</a>                               |
| Scottish Intercollegiate Guidelines Network       | 2017/07/24     | NA                                                                                                                     | 53            | 0                  | 0                  | <a href="http://www.sign.ac.uk/our-guidelines.html">www.sign.ac.uk/our-guidelines.html</a> |
| Guidelines and Audit Implementation Network       | 2017/07/24     | “hyperuricaemia” OR “hyperuricemia” OR “gout”                                                                          | 0             | 0                  | 0                  | <a href="http://rqia.org.uk/search-result">rqia.org.uk/search-result</a>                   |
| Turning Research Into Practice Database           | 2017/07/24     | hyperuricaemia OR hyperuricemia OR gout, filter: all secondary evidence                                                | 155           | 9                  | 3                  | <a href="http://www.tripdatabase.com">www.tripdatabase.com</a>                             |
| Epistemonikos database                            | 2017/07/24     | hyperuricaemia OR hyperuricemia OR gout, filter: Broad syntheses OR Structured summaries                               | 38            | 2                  | 1                  | <a href="http://www.epistemonikos.org">www.epistemonikos.org</a>                           |
| Chinese Biomedical Literature Database            | 2017/07/22     | [Original search term in Chinese] (hyperuricaemia OR gout) AND (guideline OR consensus OR statement OR recommendation) | 423           | 7                  | 5                  | <a href="http://202.115.54.56/index.jsp">202.115.54.56/index.jsp</a>                       |
| Wanfang Data                                      | 2017/07/22     | [Original search term in Chinese] (hyperuricaemia OR gout) AND (guideline OR consensus OR statement OR recommendation) | 1331          | 19                 | 4                  | <a href="http://www.wanfangdata.com.cn/">www.wanfangdata.com.cn/</a>                       |

Abbreviations: NA: Not applicable.



**Supplementary Table 4. Excluded studies and reasons for exclusion**

| <b>First author</b>    | <b>Year</b> | <b>Reason for exclusion</b>                                                              |
|------------------------|-------------|------------------------------------------------------------------------------------------|
| Wuthrich [68]          | 2016        | Review                                                                                   |
| Ceriotti [69]          | 2016        | Primary study                                                                            |
| Liote [70]             | 2016        | Editorial                                                                                |
| de Lautour [71]        | 2016        | Primary study                                                                            |
| de Lautour [72]        | 2014        | Conference abstract                                                                      |
| Dalbeth [73]           | 2015        | Review                                                                                   |
| Terslev [74]           | 2015        | Primary study                                                                            |
| Turk [75]              | 2016        | Not providing specific recommendations for hyperuricemia or gout                         |
| Stewart Coats [76]     | 2016        | Editorial                                                                                |
| Sullivan [77]          | 2015        | Review                                                                                   |
| Gutierrez [78]         | 2015        | Primary study                                                                            |
| Grainger [79]          | 2015        | Primary study                                                                            |
| Robinson [80]          | 2015        | Review                                                                                   |
| Chaudhary [81]         | 2013        | Review                                                                                   |
| Bakris [82]            | 2014        | Multimedia section                                                                       |
| Terkeltaub [83]        | 2013        | Review                                                                                   |
| Lyseng-Williamson [84] | 2013        | Review                                                                                   |
| Deodhar [85]           | 2013        | Review                                                                                   |
| Simao [86]             | 2012        | Review                                                                                   |
| Stamp [87]             | 2011        | Review                                                                                   |
| Jansen [88]            | 2010        | Not produced by related professional associations, institutes, societies, or communities |
| Grainger [89]          | 2009        | Review                                                                                   |
| Grainger [90]          | 2008        | Review                                                                                   |
| Dalbeth [91]           | 2007        | Review                                                                                   |
| Jordan [92]            | 2007        | Replaced by updated versions from the same organization                                  |
| Becker [93]            | 2007        | Not providing specific recommendations for hyperuricemia or gout                         |

|                                           |      |                                                                  |
|-------------------------------------------|------|------------------------------------------------------------------|
| Zhang [55]                                | 2006 | Replaced by updated versions from the same organization          |
| Caramia [94]                              | 2004 | Review                                                           |
| Terkeltaub [95]                           | 2003 | Case report                                                      |
| Cleland [96]                              | 1995 | Review                                                           |
| Hande [97]                                | 1984 | Case series                                                      |
| Committee on the Review of Medicines [98] | 1978 | Not providing specific recommendations for hyperuricemia or gout |
| Mourgues [99]                             | 2016 | Conference abstract                                              |
| Bakris [100]                              | 1970 | Not providing specific recommendations for hyperuricemia or gout |
| Pai [101]                                 | 2015 | Review                                                           |
| Vargas-Santos [102]                       | 2016 | Review                                                           |
| Filiopoulos [103]                         | 2016 | Comment letter                                                   |
| Chinchilla [104]                          | 2016 | Review                                                           |
| Rimler [105]                              | 2016 | Review                                                           |
| Saito [106]                               | 2016 | Not providing specific recommendations for hyperuricemia or gout |
| Mody [107]                                | 2015 | Review                                                           |
| Richette [108]                            | 2014 | Conference abstract                                              |
| Richette [109]                            | 2014 | Conference abstract                                              |
| Gutierrez [110]                           | 2014 | Conference abstract                                              |
| Furst [111]                               | 2013 | Not providing specific recommendations for hyperuricemia or gout |
| Hershfield [112]                          | 2013 | Not providing specific recommendations for hyperuricemia or gout |
| Andres [113]                              | 2012 | Conference abstract                                              |
| Stevenson [114]                           | 2011 | Technology appraisal                                             |
| Diaz-Borjon [115]                         | 2009 | Review                                                           |
| Furst [116]                               | 2010 | Not providing specific recommendations for hyperuricemia or gout |
| Taylor [117]                              | 2009 | Primary study                                                    |
| Taylor [118]                              | 2008 | Primary study                                                    |
| Bussieres [119]                           | 2008 | Not providing specific recommendations for hyperuricemia or gout |
| Brooks [120]                              | 2007 | Review                                                           |

|    |                                                             |      |                                                                  |
|----|-------------------------------------------------------------|------|------------------------------------------------------------------|
| 1  | Bestermann [121]                                            | 2005 | Not providing specific recommendations for hyperuricemia or gout |
| 2  | Schumacher Jr [122]                                         | 2004 | Review                                                           |
| 3  | Bartlett [123]                                              | 2002 | Not providing specific recommendations for hyperuricemia or gout |
| 4  | Furst [124]                                                 | 2013 | Not providing specific recommendations for hyperuricemia or gout |
| 5  | Newberry [125]                                              | 2017 | Review                                                           |
| 6  | Shekelle [126]                                              | 2017 | Review                                                           |
| 7  | Sandberg [127]                                              | 2015 | Not providing specific recommendations for hyperuricemia or gout |
| 8  | Kallinich [128]                                             | 2007 | Not providing specific recommendations for hyperuricemia or gout |
| 9  | Preminger [129]                                             | 2007 | Not providing specific recommendations for hyperuricemia or gout |
| 10 | TA164 [130]                                                 | 2008 | Technology appraisal                                             |
| 11 | Phoon [131]                                                 | 2012 | Not providing specific recommendations for hyperuricemia or gout |
| 12 | Li [132]                                                    | 2011 | Review                                                           |
| 13 | Zhang [133]                                                 | 2013 | Review                                                           |
| 14 | Deng [134]                                                  | 2016 | Primary study                                                    |
| 15 | Chinese Rheumatology Association [135]                      | 2004 | Replaced by updated versions from the same organization          |
| 16 | Chinese College of Cardiovascular Physicians [136]          | 2010 | Replaced by updated versions from the same organization          |
| 17 | Chinese Rheumatology Association [137]                      | 2011 | Replaced by updated versions from the same organization          |
| 18 | National Department of Health, Pretoria, South Africa [138] | 2006 | Not providing specific recommendations for hyperuricemia or gout |
| 19 | European Medicines Agency [139]                             | 2012 | Not providing specific recommendations for hyperuricemia or gout |
| 20 | Agency for Healthcare Research and Quality [140]            | 2017 | Review                                                           |
| 21 | Agency for Healthcare Research and Quality [141]            | 2017 | Review                                                           |
| 22 | National Institute for Health and Care Excellence [142]     | 2013 | Technology appraisal                                             |
| 23 | Agency for Healthcare Research and Quality [143]            | 2016 | Review                                                           |
| 24 | National Health System, United Kingdom [144]                | 2013 | Not providing specific recommendations for hyperuricemia or gout |
| 25 | Canadian Expert Drug Advisory Committee [145]               | 2011 | Not providing specific recommendations for hyperuricemia or gout |
| 26 | CME Academic Detailing Service [146]                        | 2013 | Presented as a 'handout', not a clinical practice guideline.     |
| 27 | Henderson [147]                                             | 2015 | Not released by a professional association                       |

**Supplementary Table 5. Domain score for each included guidance document**

| Document              | Domain 1, % | Domain 2, % | Domain 3, % | Domain 4, % | Domain 5, % | Domain 6, % |
|-----------------------|-------------|-------------|-------------|-------------|-------------|-------------|
| 3e_2013 [36]          | 95.8        | 34.7        | 65.6        | 77.8        | 42.7        | 72.9        |
| 3e_AU_NZ_2015 [43]    | 84.7        | 34.7        | 71.4        | 73.6        | 27.1        | 0.0         |
| 3e_PT_2014 [40]       | 95.8        | 22.2        | 42.7        | 70.8        | 27.1        | 0.0         |
| ACP_2017 [19, 20]     | 93.1        | 70.8        | 80.2        | 86.1        | 27.1        | 70.8        |
| ACR_2012 [14, 15]     | 86.1        | 81.9        | 73.4        | 84.7        | 1.0         | 45.8        |
| ACR_EULAR_2015 [42]   | 86.1        | 50.0        | 71.4        | 98.6        | 27.1        | 50.0        |
| BSR_2017 [21]         | 100.0       | 80.6        | 78.1        | 77.8        | 66.7        | 83.3        |
| CCCP_2012 [47]        | 76.4        | 9.7         | 8.3         | 62.5        | 0.0         | 0.0         |
| CRA_2016 [41]         | 84.7        | 48.6        | 50.5        | 70.8        | 2.1         | 33.3        |
| CRA_multi_2017 [22]   | 79.2        | 54.2        | 13.0        | 63.9        | 2.1         | 0.0         |
| CSE_2013 [37]         | 66.7        | 38.9        | 15.6        | 81.9        | 9.4         | 0.0         |
| EULAR_2006 [18]       | 86.1        | 23.6        | 65.1        | 90.3        | 24.0        | 16.7        |
| EULAR_2011 [17]       | 86.1        | 48.6        | 61.5        | 90.3        | 13.5        | 52.1        |
| EULAR_2016 [16]       | 83.3        | 79.2        | 67.7        | 94.4        | 26.0        | 29.2        |
| FMOH_2014 [44]        | 70.8        | 50.0        | 3.1         | 48.6        | 6.3         | 0.0         |
| JSGNAM_2011 [48]      | 81.9        | 38.9        | 37.0        | 87.5        | 0.0         | 0.0         |
| MOH_MSR_AMM_2008 [49] | 98.6        | 61.1        | 46.4        | 94.4        | 11.5        | 31.3        |
| PRA_2008 [50]         | 79.2        | 70.8        | 63.5        | 76.4        | 10.4        | 12.5        |
| SAMA_2003 [51]        | 75.0        | 37.5        | 28.1        | 80.6        | 5.2         | 50.0        |
| SER_2013 [46]         | 95.8        | 72.2        | 56.8        | 70.8        | 22.9        | 54.2        |
| SIR_2013 [45]         | 97.2        | 55.6        | 56.8        | 77.8        | 20.8        | 0.0         |
| T2T_2016 [39]         | 95.8        | 47.2        | 61.5        | 81.9        | 4.2         | 50.0        |
| TRA_2016 [38]         | 73.6        | 40.3        | 14.1        | 86.1        | 7.3         | 0.0         |
| UTAustin_2009 [52]    | 76.4        | 27.8        | 42.2        | 68.1        | 4.2         | 27.1        |
| <b>Median</b>         | 85.4        | 48.6        | 56.8        | 79.2        | 10.9        | 28.1        |
| <b>Minimum</b>        | 66.7        | 9.7         | 3.1         | 48.6        | 0.0         | 0.0         |
| <b>Maximum</b>        | 100.0       | 81.9        | 80.2        | 98.6        | 66.7        | 83.3        |

Supplementary Table 6. Mean scores across reviewers for the individual AGREE II domain items

| Document              | Domain 1 |     |     | Domain 2 |     |     | Domain 3 |     |     |     |     |     |     | Domain 4 |     |     | Domain 5 |     |     |     | Domain 6 |     |     |
|-----------------------|----------|-----|-----|----------|-----|-----|----------|-----|-----|-----|-----|-----|-----|----------|-----|-----|----------|-----|-----|-----|----------|-----|-----|
|                       | 1        | 2   | 3   | 4        | 5   | 6   | 7        | 8   | 9   | 10  | 11  | 12  | 13  | 14       | 15  | 16  | 17       | 18  | 19  | 20  | 21       | 22  | 23  |
| 3e_2013 [36]          | 6.8      | 6.5 | 7.0 | 7.0      | 1.3 | 1.0 | 6.3      | 3.8 | 6.3 | 5.8 | 5.8 | 6.8 | 4.0 | 1.0      | 6.0 | 7.0 | 4.0      | 6.8 | 1.0 | 5.3 | 1.3      | 7.0 | 3.8 |
| 3e_AU_NZ_2015 [43]    | 6.0      | 5.5 | 6.8 | 5.8      | 1.0 | 2.5 | 6.5      | 6.8 | 7.0 | 6.5 | 6.5 | 6.8 | 1.3 | 1.0      | 5.8 | 6.0 | 4.5      | 5.8 | 1.0 | 2.8 | 1.0      | 1.0 | 1.0 |
| 3e_PT_2014 [40]       | 6.5      | 7.0 | 6.8 | 4.8      | 1.3 | 1.0 | 2.8      | 2.3 | 5.5 | 3.5 | 5.5 | 6.8 | 1.3 | 1.0      | 5.5 | 6.3 | 4.0      | 4.5 | 1.3 | 2.8 | 2.0      | 1.0 | 1.0 |
| ACP_2017 [19, 20]     | 6.0      | 6.8 | 7.0 | 6.3      | 5.3 | 4.3 | 6.8      | 6.8 | 6.5 | 5.0 | 6.5 | 5.3 | 4.8 | 5.0      | 5.3 | 6.8 | 6.5      | 2.5 | 1.8 | 5.3 | 1.0      | 4.0 | 6.5 |
| ACR_2012 [14, 15]     | 6.5      | 5.5 | 6.5 | 7.0      | 5.3 | 5.5 | 7.0      | 7.0 | 6.8 | 6.0 | 5.8 | 6.0 | 1.5 | 3.3      | 5.8 | 7.0 | 5.5      | 1.0 | 1.0 | 1.0 | 1.3      | 3.3 | 4.3 |
| ACR_EULAR_2015 [42]   | 6.5      | 5.0 | 7.0 | 5.3      | 4.8 | 2.0 | 7.0      | 6.8 | 5.3 | 6.0 | 7.0 | 5.5 | 1.8 | 3.0      | 6.8 | 7.0 | 7.0      | 3.8 | 4.0 | 1.8 | 1.0      | 3.8 | 4.3 |
| BSR_2017 [21]         | 7.0      | 7.0 | 7.0 | 5.5      | 5.3 | 6.8 | 7.0      | 6.0 | 6.5 | 6.8 | 6.3 | 6.0 | 5.0 | 2.0      | 6.8 | 6.8 | 3.5      | 4.8 | 4.8 | 6.5 | 4.0      | 7.0 | 5.0 |
| CCCP_2012 [47]        | 6.8      | 3.0 | 7.0 | 2.0      | 1.0 | 1.8 | 1.0      | 1.0 | 1.0 | 1.0 | 3.8 | 2.0 | 1.3 | 1.0      | 4.5 | 5.8 | 4.0      | 1.0 | 1.0 | 1.0 | 1.0      | 1.0 | 1.0 |
| CRA_2016 [41]         | 6.3      | 5.0 | 7.0 | 5.5      | 1.0 | 5.3 | 5.0      | 3.3 | 6.3 | 3.5 | 6.0 | 5.5 | 1.8 | 1.0      | 5.3 | 6.5 | 4.0      | 1.3 | 1.0 | 1.3 | 1.0      | 1.0 | 5.0 |
| CRA_multi_2017 [22]   | 7.0      | 3.5 | 6.8 | 4.8      | 1.3 | 6.8 | 1.0      | 1.0 | 1.0 | 1.3 | 5.0 | 2.8 | 1.3 | 1.0      | 5.0 | 6.5 | 3.0      | 1.0 | 1.3 | 1.0 | 1.3      | 1.0 | 1.0 |
| CSE_2013 [37]         | 7.0      | 1.8 | 6.3 | 3.0      | 1.0 | 6.0 | 1.0      | 1.0 | 2.0 | 1.0 | 5.0 | 3.5 | 1.0 | 1.0      | 5.5 | 5.5 | 6.8      | 3.0 | 1.0 | 1.0 | 1.3      | 1.0 | 1.0 |
| EULAR_2006 [18]       | 6.0      | 5.5 | 7.0 | 5.0      | 1.0 | 1.3 | 7.0      | 7.0 | 5.8 | 4.3 | 6.0 | 5.8 | 1.3 | 2.3      | 6.0 | 6.8 | 6.5      | 1.0 | 2.5 | 5.3 | 1.0      | 3.0 | 1.0 |
| EULAR_2011 [17]       | 6.5      | 5.0 | 7.0 | 5.0      | 1.0 | 5.8 | 4.0      | 4.5 | 6.8 | 6.0 | 7.0 | 7.0 | 1.3 | 1.0      | 5.8 | 6.8 | 6.8      | 1.3 | 1.3 | 3.8 | 1.0      | 3.8 | 4.5 |
| EULAR_2016 [16]       | 6.3      | 4.8 | 7.0 | 5.8      | 5.0 | 6.5 | 5.0      | 2.0 | 6.3 | 6.8 | 6.0 | 6.5 | 6.0 | 2.0      | 6.5 | 6.8 | 6.8      | 3.0 | 1.3 | 5.0 | 1.0      | 1.5 | 4.0 |
| FMOH_2014 [44]        | 6.5      | 2.8 | 6.5 | 5.3      | 1.0 | 5.8 | 1.0      | 1.0 | 1.0 | 1.0 | 2.0 | 1.5 | 1.0 | 1.0      | 3.0 | 4.5 | 4.3      | 1.0 | 1.3 | 2.3 | 1.0      | 1.0 | 1.0 |
| JSGNAM_2011 [48]      | 5.3      | 5.5 | 7.0 | 1.8      | 4.3 | 4.0 | 1.3      | 1.0 | 6.8 | 3.3 | 6.3 | 3.8 | 2.5 | 1.0      | 6.8 | 6.3 | 5.8      | 1.0 | 1.0 | 1.0 | 1.0      | 1.0 | 1.0 |
| MOH_MSR_AMM_2008 [49] | 6.8      | 7.0 | 7.0 | 5.5      | 1.5 | 7.0 | 4.3      | 1.0 | 5.8 | 1.5 | 5.8 | 4.8 | 2.5 | 4.8      | 6.5 | 6.8 | 6.8      | 1.8 | 3.0 | 1.0 | 1.0      | 4.0 | 1.8 |
| PRA_2008 [50]         | 6.5      | 5.5 | 5.3 | 3.8      | 5.0 | 7.0 | 5.0      | 4.3 | 7.0 | 4.8 | 6.5 | 4.8 | 1.3 | 5.0      | 5.3 | 6.5 | 5.0      | 1.8 | 1.3 | 2.5 | 1.0      | 1.0 | 2.5 |
| SAMA_2003 [51]        | 6.5      | 3.0 | 7.0 | 4.0      | 1.3 | 4.5 | 1.0      | 1.0 | 1.0 | 4.0 | 6.5 | 2.8 | 2.5 | 2.8      | 5.0 | 6.5 | 6.0      | 1.0 | 2.0 | 1.3 | 1.0      | 7.0 | 1.0 |
| SER_2013 [46]         | 7.0      | 6.3 | 7.0 | 6.8      | 5.0 | 4.3 | 3.3      | 1.0 | 7.0 | 4.0 | 6.8 | 4.8 | 2.0 | 6.5      | 5.8 | 6.8 | 4.3      | 3.5 | 2.3 | 2.8 | 1.0      | 6.5 | 2.0 |
| SIR_2013 [45]         | 6.8      | 6.8 | 7.0 | 6.3      | 1.0 | 5.8 | 4.0      | 6.8 | 6.3 | 4.3 | 6.3 | 5.5 | 1.3 | 1.0      | 6.3 | 6.8 | 4.0      | 2.5 | 1.0 | 4.5 | 1.0      | 1.0 | 1.0 |
| T2T_2016 [39]         | 6.3      | 7.0 | 7.0 | 5.3      | 5.0 | 1.3 | 7.0      | 6.5 | 6.5 | 6.5 | 3.3 | 4.0 | 1.8 | 2.0      | 5.0 | 6.3 | 6.5      | 2.0 | 1.0 | 1.0 | 1.0      | 3.5 | 4.5 |
| TRA_2016 [38]         | 5.8      | 3.5 | 7.0 | 5.0      | 1.5 | 3.8 | 1.0      | 1.3 | 1.0 | 1.3 | 5.5 | 2.5 | 1.3 | 1.0      | 5.5 | 6.5 | 6.5      | 1.0 | 1.5 | 2.3 | 1.0      | 1.0 | 1.0 |
| UTAustin_2009 [52]    | 7.0      | 2.8 | 7.0 | 3.0      | 1.0 | 4.0 | 4.3      | 2.0 | 7.0 | 2.5 | 4.3 | 5.3 | 2.0 | 1.0      | 4.8 | 5.3 | 5.3      | 1.3 | 1.5 | 1.3 | 1.0      | 4.0 | 1.3 |

Supplementary Table 7. Scores for each individual AGREE II domain items by each reviewer

|                            | Ite m1 | Ite m2 | Ite m3 | Ite m4 | Ite m5 | Ite m6 | Ite m7 | Ite m8 | Ite m9 | Item 10 | Item 11 | Item 12 | Item 13 | Item 14 | Item 15 | Item 16 | Item 17 | Item 18 | Item 19 | Item 20 | Item 21 | Item 22 | Item 23 |
|----------------------------|--------|--------|--------|--------|--------|--------|--------|--------|--------|---------|---------|---------|---------|---------|---------|---------|---------|---------|---------|---------|---------|---------|---------|
| <b>3e_2013 [36]</b>        |        |        |        |        |        |        |        |        |        |         |         |         |         |         |         |         |         |         |         |         |         |         |         |
| Rev1                       | 7      | 7      | 7      | 7      | 1      | 1      | 6      | 4      | 4      | 5       | 7       | 7       | 2       | 1       | 6       | 7       | 4       | 7       | 1       | 5       | 1       | 7       | 4       |
| Rev2                       | 6      | 7      | 7      | 7      | 1      | 1      | 6      | 2      | 7      | 5       | 6       | 7       | 4       | 1       | 6       | 7       | 4       | 7       | 1       | 6       | 1       | 7       | 4       |
| Rev3                       | 7      | 5      | 7      | 7      | 2      | 1      | 7      | 5      | 7      | 6       | 5       | 6       | 5       | 1       | 5       | 7       | 4       | 7       | 1       | 5       | 2       | 7       | 3       |
| Rev4                       | 7      | 7      | 7      | 7      | 1      | 1      | 6      | 4      | 7      | 7       | 5       | 7       | 5       | 1       | 7       | 7       | 4       | 6       | 1       | 5       | 1       | 7       | 4       |
| <b>3e_AU_NZ_2015 [43]</b>  |        |        |        |        |        |        |        |        |        |         |         |         |         |         |         |         |         |         |         |         |         |         |         |
| Rev1                       | 5      | 5      | 7      | 7      | 1      | 2      | 7      | 7      | 7      | 7       | 7       | 7       | 2       | 1       | 5       | 6       | 4       | 6       | 1       | 2       | 1       | 1       | 1       |
| Rev2                       | 7      | 5      | 7      | 7      | 1      | 1      | 5      | 7      | 7      | 6       | 6       | 7       | 1       | 1       | 6       | 7       | 4       | 6       | 1       | 4       | 1       | 1       | 1       |
| Rev3                       | 5      | 7      | 7      | 4      | 1      | 4      | 7      | 7      | 7      | 7       | 7       | 7       | 1       | 1       | 6       | 5       | 6       | 6       | 1       | 2       | 1       | 1       | 1       |
| Rev4                       | 7      | 5      | 6      | 5      | 1      | 3      | 7      | 6      | 7      | 6       | 6       | 6       | 1       | 1       | 6       | 6       | 4       | 5       | 1       | 3       | 1       | 1       | 1       |
| <b>3e_PT_2014 [40]</b>     |        |        |        |        |        |        |        |        |        |         |         |         |         |         |         |         |         |         |         |         |         |         |         |
| Rev1                       | 6      | 7      | 7      | 5      | 1      | 1      | 3      | 1      | 7      | 3       | 6       | 7       | 2       | 1       | 5       | 6       | 4       | 4       | 1       | 5       | 1       | 1       | 1       |
| Rev2                       | 6      | 7      | 7      | 5      | 1      | 1      | 3      | 1      | 7      | 3       | 6       | 7       | 1       | 1       | 6       | 7       | 4       | 6       | 1       | 3       | 1       | 1       | 1       |
| Rev3                       | 7      | 7      | 6      | 5      | 2      | 1      | 2      | 1      | 6      | 5       | 4       | 6       | 1       | 1       | 5       | 6       | 4       | 4       | 2       | 2       | 5       | 1       | 1       |
| Rev4                       | 7      | 7      | 7      | 4      | 1      | 1      | 3      | 6      | 2      | 3       | 6       | 7       | 1       | 1       | 6       | 6       | 4       | 4       | 1       | 1       | 1       | 1       | 1       |
| <b>ACP_2017 [19, 20]</b>   |        |        |        |        |        |        |        |        |        |         |         |         |         |         |         |         |         |         |         |         |         |         |         |
| Rev1                       | 6      | 7      | 7      | 6      | 5      | 4      | 7      | 7      | 7      | 5       | 7       | 5       | 5       | 5       | 5       | 7       | 7       | 2       | 2       | 4       | 1       | 4       | 7       |
| Rev2                       | 6      | 7      | 7      | 6      | 5      | 4      | 7      | 7      | 7      | 5       | 7       | 5       | 5       | 4       | 6       | 7       | 7       | 4       | 3       | 7       | 1       | 4       | 7       |
| Rev3                       | 6      | 7      | 7      | 6      | 6      | 3      | 6      | 6      | 6      | 6       | 6       | 5       | 4       | 5       | 5       | 6       | 6       | 2       | 1       | 5       | 1       | 4       | 6       |
| Rev4                       | 6      | 6      | 7      | 7      | 5      | 6      | 7      | 7      | 6      | 4       | 6       | 6       | 5       | 6       | 5       | 7       | 6       | 2       | 1       | 5       | 1       | 4       | 6       |
| <b>ACR_2012 [14, 15]</b>   |        |        |        |        |        |        |        |        |        |         |         |         |         |         |         |         |         |         |         |         |         |         |         |
| Rev1                       | 6      | 5      | 7      | 7      | 5      | 7      | 7      | 7      | 6      | 6       | 6       | 5       | 2       | 3       | 5       | 7       | 4       | 1       | 1       | 1       | 1       | 3       | 4       |
| Rev2                       | 6      | 7      | 7      | 7      | 7      | 4      | 7      | 7      | 7      | 6       | 6       | 5       | 2       | 3       | 6       | 7       | 7       | 1       | 1       | 1       | 1       | 4       | 4       |
| Rev3                       | 7      | 5      | 7      | 7      | 5      | 7      | 7      | 7      | 7      | 6       | 5       | 7       | 1       | 3       | 5       | 7       | 7       | 1       | 1       | 1       | 2       | 3       | 4       |
| Rev4                       | 7      | 5      | 5      | 7      | 4      | 4      | 7      | 7      | 7      | 6       | 6       | 7       | 1       | 4       | 7       | 7       | 4       | 1       | 1       | 1       | 1       | 3       | 5       |
| <b>ACR_EULAR_2015 [42]</b> |        |        |        |        |        |        |        |        |        |         |         |         |         |         |         |         |         |         |         |         |         |         |         |
| Rev1                       | 6      | 5      | 7      | 6      | 6      | 2      | 7      | 7      | 7      | 7       | 7       | 5       | 2       | 3       | 7       | 7       | 7       | 3       | 3       | 1       | 1       | 4       | 4       |

|                            |   |   |   |   |   |   |   |   |   |   |   |   |   |   |   |   |   |   |   |   |   |   |   |
|----------------------------|---|---|---|---|---|---|---|---|---|---|---|---|---|---|---|---|---|---|---|---|---|---|---|
| <b>Rev2</b>                | 6 | 5 | 7 | 5 | 6 | 1 | 7 | 7 | 6 | 6 | 7 | 5 | 2 | 3 | 7 | 7 | 7 | 5 | 7 | 1 | 1 | 4 | 4 |
| <b>Rev3</b>                | 7 | 5 | 7 | 5 | 6 | 2 | 7 | 7 | 7 | 6 | 7 | 5 | 2 | 3 | 7 | 7 | 7 | 3 | 3 | 1 | 1 | 3 | 4 |
| <b>Rev4</b>                | 7 | 5 | 7 | 5 | 1 | 3 | 7 | 6 | 1 | 5 | 7 | 7 | 1 | 3 | 6 | 7 | 7 | 4 | 3 | 4 | 1 | 4 | 5 |
| <b>BSR_2017 [21]</b>       |   |   |   |   |   |   |   |   |   |   |   |   |   |   |   |   |   |   |   |   |   |   |   |
| <b>Rev1</b>                | 7 | 7 | 7 | 6 | 5 | 7 | 7 | 6 | 6 | 7 | 6 | 6 | 5 | 2 | 7 | 7 | 4 | 5 | 4 | 7 | 2 | 7 | 5 |
| <b>Rev2</b>                | 7 | 7 | 7 | 6 | 5 | 7 | 7 | 6 | 6 | 6 | 7 | 5 | 5 | 2 | 7 | 7 | 3 | 5 | 5 | 7 | 5 | 7 | 5 |
| <b>Rev3</b>                | 7 | 7 | 7 | 4 | 5 | 6 | 7 | 7 | 7 | 7 | 5 | 6 | 5 | 1 | 6 | 6 | 3 | 4 | 5 | 6 | 2 | 7 | 5 |
| <b>Rev4</b>                | 7 | 7 | 7 | 6 | 6 | 7 | 7 | 5 | 7 | 7 | 7 | 7 | 5 | 3 | 7 | 7 | 4 | 5 | 5 | 6 | 2 | 7 | 5 |
| <b>CCCP_2012 [47]</b>      |   |   |   |   |   |   |   |   |   |   |   |   |   |   |   |   |   |   |   |   |   |   |   |
| <b>Rev1</b>                | 6 | 3 | 7 | 2 | 1 | 2 | 1 | 1 | 1 | 1 | 3 | 1 | 2 | 1 | 3 | 6 | 4 | 1 | 1 | 1 | 1 | 1 | 1 |
| <b>Rev2</b>                | 7 | 3 | 7 | 2 | 1 | 1 | 1 | 1 | 1 | 1 | 4 | 3 | 1 | 1 | 4 | 5 | 4 | 1 | 1 | 1 | 1 | 1 | 1 |
| <b>Rev3</b>                | 7 | 3 | 7 | 2 | 1 | 1 | 1 | 1 | 1 | 1 | 4 | 2 | 1 | 1 | 6 | 6 | 4 | 1 | 1 | 1 | 1 | 1 | 1 |
| <b>Rev4</b>                | 7 | 3 | 7 | 2 | 1 | 3 | 1 | 1 | 1 | 1 | 4 | 2 | 1 | 1 | 5 | 6 | 4 | 1 | 1 | 1 | 1 | 1 | 1 |
| <b>CRA_2016 [41]</b>       |   |   |   |   |   |   |   |   |   |   |   |   |   |   |   |   |   |   |   |   |   |   |   |
| <b>Rev1</b>                | 5 | 5 | 7 | 6 | 1 | 4 | 5 | 3 | 7 | 3 | 7 | 5 | 2 | 1 | 5 | 7 | 4 | 1 | 1 | 1 | 1 | 1 | 4 |
| <b>Rev2</b>                | 7 | 5 | 7 | 6 | 1 | 5 | 4 | 3 | 6 | 4 | 6 | 5 | 3 | 1 | 6 | 7 | 4 | 1 | 1 | 1 | 1 | 1 | 4 |
| <b>Rev3</b>                | 7 | 5 | 7 | 5 | 1 | 6 | 5 | 3 | 6 | 1 | 5 | 6 | 1 | 1 | 5 | 6 | 4 | 1 | 1 | 2 | 1 | 1 | 6 |
| <b>Rev4</b>                | 6 | 5 | 7 | 5 | 1 | 6 | 6 | 4 | 6 | 6 | 6 | 6 | 1 | 1 | 5 | 6 | 4 | 2 | 1 | 1 | 1 | 1 | 6 |
| <b>CRA_multi_2017 [22]</b> |   |   |   |   |   |   |   |   |   |   |   |   |   |   |   |   |   |   |   |   |   |   |   |
| <b>Rev1</b>                | 7 | 3 | 7 | 5 | 1 | 7 | 1 | 1 | 1 | 1 | 5 | 3 | 2 | 1 | 5 | 7 | 2 | 1 | 1 | 1 | 1 | 1 | 1 |
| <b>Rev2</b>                | 7 | 3 | 7 | 5 | 1 | 7 | 1 | 1 | 1 | 2 | 5 | 2 | 1 | 1 | 5 | 7 | 3 | 1 | 1 | 1 | 1 | 1 | 1 |
| <b>Rev3</b>                | 7 | 3 | 7 | 4 | 2 | 6 | 1 | 1 | 1 | 1 | 5 | 5 | 1 | 1 | 5 | 5 | 3 | 1 | 1 | 1 | 2 | 1 | 1 |
| <b>Rev4</b>                | 7 | 5 | 6 | 5 | 1 | 7 | 1 | 1 | 1 | 1 | 5 | 1 | 1 | 1 | 5 | 7 | 4 | 1 | 2 | 1 | 1 | 1 | 1 |
| <b>CSE_2013 [37]</b>       |   |   |   |   |   |   |   |   |   |   |   |   |   |   |   |   |   |   |   |   |   |   |   |
| <b>Rev1</b>                | 7 | 1 | 6 | 3 | 1 | 6 | 1 | 1 | 2 | 1 | 5 | 5 | 1 | 1 | 5 | 6 | 7 | 3 | 1 | 1 | 1 | 1 | 1 |
| <b>Rev2</b>                | 7 | 3 | 6 | 4 | 1 | 6 | 1 | 1 | 3 | 1 | 5 | 3 | 1 | 1 | 6 | 6 | 7 | 3 | 1 | 1 | 1 | 1 | 1 |
| <b>Rev3</b>                | 7 | 1 | 7 | 2 | 1 | 7 | 1 | 1 | 2 | 1 | 5 | 3 | 1 | 1 | 6 | 6 | 6 | 3 | 1 | 1 | 2 | 1 | 1 |
| <b>Rev4</b>                | 7 | 2 | 6 | 3 | 1 | 5 | 1 | 1 | 1 | 1 | 5 | 3 | 1 | 1 | 5 | 4 | 7 | 3 | 1 | 1 | 1 | 1 | 1 |
| <b>EULAR_2006 [18]</b>     |   |   |   |   |   |   |   |   |   |   |   |   |   |   |   |   |   |   |   |   |   |   |   |
| <b>Rev1</b>                | 5 | 5 | 7 | 5 | 1 | 1 | 7 | 7 | 5 | 3 | 6 | 5 | 2 | 1 | 5 | 7 | 7 | 1 | 2 | 5 | 1 | 4 | 1 |

|                              |   |   |   |   |   |   |   |   |   |   |   |   |   |   |   |   |   |   |   |   |   |   |   |
|------------------------------|---|---|---|---|---|---|---|---|---|---|---|---|---|---|---|---|---|---|---|---|---|---|---|
| <b>Rev2</b>                  | 6 | 5 | 7 | 5 | 1 | 1 | 7 | 7 | 6 | 5 | 6 | 6 | 1 | 1 | 6 | 7 | 6 | 1 | 4 | 6 | 1 | 4 | 1 |
| <b>Rev3</b>                  | 7 | 7 | 7 | 5 | 1 | 1 | 7 | 7 | 6 | 5 | 7 | 6 | 1 | 1 | 7 | 7 | 7 | 1 | 1 | 5 | 1 | 1 | 1 |
| <b>Rev4</b>                  | 6 | 5 | 7 | 5 | 1 | 2 | 7 | 7 | 6 | 4 | 5 | 6 | 1 | 6 | 6 | 6 | 6 | 1 | 3 | 5 | 1 | 3 | 1 |
| <b>EULAR_2011 [17]</b>       |   |   |   |   |   |   |   |   |   |   |   |   |   |   |   |   |   |   |   |   |   |   |   |
| <b>Rev1</b>                  | 6 | 5 | 7 | 4 | 1 | 7 | 4 | 1 | 7 | 7 | 7 | 7 | 2 | 1 | 5 | 7 | 7 | 2 | 1 | 2 | 1 | 4 | 4 |
| <b>Rev2</b>                  | 6 | 5 | 7 | 5 | 1 | 3 | 4 | 7 | 7 | 4 | 7 | 7 | 1 | 1 | 6 | 7 | 7 | 1 | 1 | 5 | 1 | 4 | 4 |
| <b>Rev3</b>                  | 7 | 5 | 7 | 6 | 1 | 7 | 4 | 4 | 7 | 7 | 7 | 7 | 1 | 1 | 6 | 7 | 7 | 1 | 1 | 4 | 1 | 4 | 6 |
| <b>Rev4</b>                  | 7 | 5 | 7 | 5 | 1 | 6 | 4 | 6 | 6 | 6 | 7 | 7 | 1 | 1 | 6 | 6 | 6 | 1 | 2 | 4 | 1 | 3 | 4 |
| <b>EULAR_2016 [16]</b>       |   |   |   |   |   |   |   |   |   |   |   |   |   |   |   |   |   |   |   |   |   |   |   |
| <b>Rev1</b>                  | 7 | 7 | 7 | 6 | 5 | 7 | 5 | 2 | 7 | 7 | 7 | 7 | 6 | 1 | 7 | 7 | 7 | 2 | 2 | 5 | 1 | 1 | 4 |
| <b>Rev2</b>                  | 7 | 1 | 7 | 6 | 5 | 7 | 5 | 2 | 7 | 7 | 6 | 7 | 6 | 3 | 7 | 7 | 7 | 4 | 1 | 6 | 1 | 1 | 4 |
| <b>Rev3</b>                  | 5 | 5 | 7 | 5 | 5 | 5 | 5 | 1 | 6 | 6 | 5 | 6 | 6 | 2 | 5 | 6 | 6 | 4 | 1 | 4 | 1 | 1 | 4 |
| <b>Rev4</b>                  | 6 | 6 | 7 | 6 | 5 | 7 | 5 | 3 | 5 | 7 | 6 | 6 | 6 | 2 | 7 | 7 | 7 | 2 | 1 | 5 | 1 | 3 | 4 |
| <b>FMOH_2014 [44]</b>        |   |   |   |   |   |   |   |   |   |   |   |   |   |   |   |   |   |   |   |   |   |   |   |
| <b>Rev1</b>                  | 7 | 3 | 7 | 6 | 1 | 4 | 1 | 1 | 1 | 1 | 2 | 1 | 1 | 1 | 3 | 1 | 4 | 1 | 1 | 2 | 1 | 1 | 1 |
| <b>Rev2</b>                  | 7 | 3 | 7 | 5 | 1 | 7 | 1 | 1 | 1 | 1 | 2 | 1 | 1 | 1 | 4 | 4 | 4 | 1 | 2 | 3 | 1 | 1 | 1 |
| <b>Rev3</b>                  | 6 | 2 | 5 | 5 | 1 | 6 | 1 | 1 | 1 | 1 | 1 | 2 | 1 | 1 | 2 | 7 | 6 | 1 | 1 | 1 | 1 | 1 | 1 |
| <b>Rev4</b>                  | 6 | 3 | 7 | 5 | 1 | 6 | 1 | 1 | 1 | 1 | 3 | 2 | 1 | 1 | 3 | 6 | 3 | 1 | 1 | 3 | 1 | 1 | 1 |
| <b>JSGNAM_2011 [48]</b>      |   |   |   |   |   |   |   |   |   |   |   |   |   |   |   |   |   |   |   |   |   |   |   |
| <b>Rev1</b>                  | 5 | 5 | 7 | 2 | 4 | 4 | 1 | 1 | 6 | 3 | 6 | 3 | 2 | 1 | 7 | 7 | 4 | 1 | 1 | 1 | 1 | 1 | 1 |
| <b>Rev2</b>                  | 6 | 5 | 7 | 2 | 4 | 4 | 1 | 1 | 7 | 4 | 6 | 4 | 3 | 1 | 7 | 6 | 7 | 1 | 1 | 1 | 1 | 1 | 1 |
| <b>Rev3</b>                  | 5 | 7 | 7 | 1 | 4 | 4 | 1 | 1 | 7 | 1 | 7 | 4 | 2 | 1 | 7 | 6 | 7 | 1 | 1 | 1 | 1 | 1 | 1 |
| <b>Rev4</b>                  | 5 | 5 | 7 | 2 | 5 | 4 | 2 | 1 | 7 | 5 | 6 | 4 | 3 | 1 | 6 | 6 | 5 | 1 | 1 | 1 | 1 | 1 | 1 |
| <b>MOH_MSR_AMM_2008 [49]</b> |   |   |   |   |   |   |   |   |   |   |   |   |   |   |   |   |   |   |   |   |   |   |   |
| <b>Rev1</b>                  | 6 | 7 | 7 | 5 | 1 | 7 | 4 | 1 | 5 | 1 | 6 | 5 | 2 | 4 | 7 | 7 | 7 | 2 | 3 | 1 | 1 | 4 | 1 |
| <b>Rev2</b>                  | 7 | 7 | 7 | 5 | 3 | 7 | 4 | 1 | 6 | 2 | 6 | 4 | 3 | 5 | 6 | 7 | 7 | 3 | 5 | 1 | 1 | 4 | 2 |
| <b>Rev3</b>                  | 7 | 7 | 7 | 7 | 1 | 7 | 4 | 1 | 6 | 1 | 6 | 5 | 2 | 5 | 7 | 7 | 7 | 1 | 1 | 1 | 1 | 4 | 2 |
| <b>Rev4</b>                  | 7 | 7 | 7 | 5 | 1 | 7 | 5 | 1 | 6 | 2 | 5 | 5 | 3 | 5 | 6 | 6 | 6 | 1 | 3 | 1 | 1 | 4 | 2 |
| <b>PRA_2008 [50]</b>         |   |   |   |   |   |   |   |   |   |   |   |   |   |   |   |   |   |   |   |   |   |   |   |
| <b>Rev1</b>                  | 5 | 3 | 5 | 4 | 5 | 7 | 5 | 1 | 7 | 4 | 7 | 5 | 1 | 5 | 5 | 7 | 4 | 2 | 1 | 2 | 1 | 1 | 2 |



|    |                           |   |   |   |   |   |   |   |   |   |   |   |   |   |   |   |   |   |   |   |   |   |   |   |
|----|---------------------------|---|---|---|---|---|---|---|---|---|---|---|---|---|---|---|---|---|---|---|---|---|---|---|
| 1  |                           |   |   |   |   |   |   |   |   |   |   |   |   |   |   |   |   |   |   |   |   |   |   |   |
| 2  |                           |   |   |   |   |   |   |   |   |   |   |   |   |   |   |   |   |   |   |   |   |   |   |   |
| 3  |                           |   |   |   |   |   |   |   |   |   |   |   |   |   |   |   |   |   |   |   |   |   |   |   |
| 4  |                           |   |   |   |   |   |   |   |   |   |   |   |   |   |   |   |   |   |   |   |   |   |   |   |
| 5  |                           |   |   |   |   |   |   |   |   |   |   |   |   |   |   |   |   |   |   |   |   |   |   |   |
| 6  |                           |   |   |   |   |   |   |   |   |   |   |   |   |   |   |   |   |   |   |   |   |   |   |   |
| 7  |                           |   |   |   |   |   |   |   |   |   |   |   |   |   |   |   |   |   |   |   |   |   |   |   |
| 8  |                           |   |   |   |   |   |   |   |   |   |   |   |   |   |   |   |   |   |   |   |   |   |   |   |
| 9  |                           |   |   |   |   |   |   |   |   |   |   |   |   |   |   |   |   |   |   |   |   |   |   |   |
| 10 |                           |   |   |   |   |   |   |   |   |   |   |   |   |   |   |   |   |   |   |   |   |   |   |   |
| 11 |                           |   |   |   |   |   |   |   |   |   |   |   |   |   |   |   |   |   |   |   |   |   |   |   |
| 12 |                           |   |   |   |   |   |   |   |   |   |   |   |   |   |   |   |   |   |   |   |   |   |   |   |
| 13 |                           |   |   |   |   |   |   |   |   |   |   |   |   |   |   |   |   |   |   |   |   |   |   |   |
| 14 |                           |   |   |   |   |   |   |   |   |   |   |   |   |   |   |   |   |   |   |   |   |   |   |   |
| 15 |                           |   |   |   |   |   |   |   |   |   |   |   |   |   |   |   |   |   |   |   |   |   |   |   |
| 16 |                           |   |   |   |   |   |   |   |   |   |   |   |   |   |   |   |   |   |   |   |   |   |   |   |
| 17 |                           |   |   |   |   |   |   |   |   |   |   |   |   |   |   |   |   |   |   |   |   |   |   |   |
| 18 |                           |   |   |   |   |   |   |   |   |   |   |   |   |   |   |   |   |   |   |   |   |   |   |   |
| 19 |                           |   |   |   |   |   |   |   |   |   |   |   |   |   |   |   |   |   |   |   |   |   |   |   |
| 20 |                           |   |   |   |   |   |   |   |   |   |   |   |   |   |   |   |   |   |   |   |   |   |   |   |
| 21 |                           |   |   |   |   |   |   |   |   |   |   |   |   |   |   |   |   |   |   |   |   |   |   |   |
| 22 |                           |   |   |   |   |   |   |   |   |   |   |   |   |   |   |   |   |   |   |   |   |   |   |   |
| 23 |                           |   |   |   |   |   |   |   |   |   |   |   |   |   |   |   |   |   |   |   |   |   |   |   |
| 24 |                           |   |   |   |   |   |   |   |   |   |   |   |   |   |   |   |   |   |   |   |   |   |   |   |
| 25 |                           |   |   |   |   |   |   |   |   |   |   |   |   |   |   |   |   |   |   |   |   |   |   |   |
| 26 |                           |   |   |   |   |   |   |   |   |   |   |   |   |   |   |   |   |   |   |   |   |   |   |   |
| 27 |                           |   |   |   |   |   |   |   |   |   |   |   |   |   |   |   |   |   |   |   |   |   |   |   |
| 28 |                           |   |   |   |   |   |   |   |   |   |   |   |   |   |   |   |   |   |   |   |   |   |   |   |
| 29 |                           |   |   |   |   |   |   |   |   |   |   |   |   |   |   |   |   |   |   |   |   |   |   |   |
| 30 |                           |   |   |   |   |   |   |   |   |   |   |   |   |   |   |   |   |   |   |   |   |   |   |   |
| 31 |                           |   |   |   |   |   |   |   |   |   |   |   |   |   |   |   |   |   |   |   |   |   |   |   |
| 32 |                           |   |   |   |   |   |   |   |   |   |   |   |   |   |   |   |   |   |   |   |   |   |   |   |
| 33 |                           |   |   |   |   |   |   |   |   |   |   |   |   |   |   |   |   |   |   |   |   |   |   |   |
| 34 |                           |   |   |   |   |   |   |   |   |   |   |   |   |   |   |   |   |   |   |   |   |   |   |   |
| 35 |                           |   |   |   |   |   |   |   |   |   |   |   |   |   |   |   |   |   |   |   |   |   |   |   |
| 36 |                           |   |   |   |   |   |   |   |   |   |   |   |   |   |   |   |   |   |   |   |   |   |   |   |
| 37 |                           |   |   |   |   |   |   |   |   |   |   |   |   |   |   |   |   |   |   |   |   |   |   |   |
| 38 |                           |   |   |   |   |   |   |   |   |   |   |   |   |   |   |   |   |   |   |   |   |   |   |   |
| 39 |                           |   |   |   |   |   |   |   |   |   |   |   |   |   |   |   |   |   |   |   |   |   |   |   |
| 40 |                           |   |   |   |   |   |   |   |   |   |   |   |   |   |   |   |   |   |   |   |   |   |   |   |
| 41 |                           |   |   |   |   |   |   |   |   |   |   |   |   |   |   |   |   |   |   |   |   |   |   |   |
| 42 |                           |   |   |   |   |   |   |   |   |   |   |   |   |   |   |   |   |   |   |   |   |   |   |   |
| 43 |                           |   |   |   |   |   |   |   |   |   |   |   |   |   |   |   |   |   |   |   |   |   |   |   |
| 44 |                           |   |   |   |   |   |   |   |   |   |   |   |   |   |   |   |   |   |   |   |   |   |   |   |
| 45 |                           |   |   |   |   |   |   |   |   |   |   |   |   |   |   |   |   |   |   |   |   |   |   |   |
| 46 |                           |   |   |   |   |   |   |   |   |   |   |   |   |   |   |   |   |   |   |   |   |   |   |   |
|    | <b>Rev2</b>               | 7 | 7 | 4 | 3 | 5 | 7 | 5 | 6 | 7 | 4 | 6 | 4 | 2 | 5 | 5 | 6 | 7 | 3 | 2 | 3 | 1 | 1 | 4 |
|    | <b>Rev3</b>               | 7 | 7 | 7 | 4 | 5 | 7 | 5 | 5 | 7 | 6 | 7 | 5 | 1 | 5 | 6 | 7 | 5 | 1 | 1 | 2 | 1 | 1 | 2 |
|    | <b>Rev4</b>               | 7 | 5 | 5 | 4 | 5 | 7 | 5 | 5 | 7 | 5 | 6 | 5 | 1 | 5 | 5 | 6 | 4 | 1 | 1 | 3 | 1 | 1 | 2 |
|    | <b>SAMA_2003 [51]</b>     |   |   |   |   |   |   |   |   |   |   |   |   |   |   |   |   |   |   |   |   |   |   |   |
|    | <b>Rev1</b>               | 6 | 3 | 7 | 5 | 1 | 4 | 1 | 1 | 1 | 5 | 7 | 3 | 2 | 3 | 3 | 6 | 7 | 1 | 1 | 2 | 1 | 7 | 1 |
|    | <b>Rev2</b>               | 7 | 3 | 7 | 4 | 1 | 5 | 1 | 1 | 1 | 5 | 7 | 2 | 4 | 2 | 5 | 7 | 4 | 1 | 5 | 1 | 1 | 7 | 1 |
|    | <b>Rev3</b>               | 7 | 3 | 7 | 2 | 1 | 5 | 1 | 1 | 1 | 1 | 7 | 3 | 1 | 1 | 6 | 7 | 7 | 1 | 1 | 1 | 1 | 7 | 1 |
|    | <b>Rev4</b>               | 6 | 3 | 7 | 5 | 2 | 4 | 1 | 1 | 1 | 5 | 5 | 3 | 3 | 5 | 6 | 6 | 6 | 1 | 1 | 1 | 1 | 7 | 1 |
|    | <b>SER_2013 [46]</b>      |   |   |   |   |   |   |   |   |   |   |   |   |   |   |   |   |   |   |   |   |   |   |   |
|    | <b>Rev1</b>               | 7 | 6 | 7 | 7 | 5 | 4 | 3 | 1 | 7 | 3 | 7 | 5 | 2 | 5 | 5 | 6 | 4 | 2 | 2 | 2 | 1 | 7 | 2 |
|    | <b>Rev2</b>               | 7 | 6 | 7 | 6 | 5 | 3 | 3 | 1 | 7 | 5 | 6 | 4 | 2 | 7 | 6 | 7 | 4 | 4 | 5 | 3 | 1 | 5 | 2 |
|    | <b>Rev3</b>               | 7 | 7 | 7 | 7 | 5 | 5 | 3 | 1 | 7 | 3 | 7 | 6 | 2 | 7 | 7 | 7 | 4 | 4 | 1 | 4 | 1 | 7 | 2 |
|    | <b>Rev4</b>               | 7 | 6 | 7 | 7 | 5 | 5 | 4 | 1 | 7 | 5 | 7 | 4 | 2 | 7 | 5 | 7 | 5 | 4 | 1 | 2 | 1 | 7 | 2 |
|    | <b>SIR_2013 [45]</b>      |   |   |   |   |   |   |   |   |   |   |   |   |   |   |   |   |   |   |   |   |   |   |   |
|    | <b>Rev1</b>               | 7 | 7 | 7 | 6 | 1 | 7 | 4 | 7 | 5 | 3 | 7 | 5 | 2 | 1 | 7 | 7 | 4 | 2 | 1 | 4 | 1 | 1 | 1 |
|    | <b>Rev2</b>               | 7 | 7 | 7 | 6 | 1 | 4 | 4 | 7 | 7 | 5 | 6 | 5 | 1 | 1 | 6 | 7 | 4 | 4 | 1 | 6 | 1 | 1 | 1 |
|    | <b>Rev3</b>               | 7 | 7 | 7 | 6 | 1 | 6 | 4 | 7 | 7 | 6 | 7 | 6 | 1 | 1 | 6 | 7 | 4 | 1 | 1 | 4 | 1 | 1 | 1 |
|    | <b>Rev4</b>               | 6 | 6 | 7 | 7 | 1 | 6 | 4 | 6 | 6 | 3 | 5 | 6 | 1 | 1 | 6 | 6 | 4 | 3 | 1 | 4 | 1 | 1 | 1 |
|    | <b>T2T_2016 [39]</b>      |   |   |   |   |   |   |   |   |   |   |   |   |   |   |   |   |   |   |   |   |   |   |   |
|    | <b>Rev1</b>               | 6 | 7 | 7 | 5 | 5 | 1 | 7 | 7 | 7 | 7 | 3 | 3 | 2 | 1 | 4 | 6 | 7 | 3 | 1 | 1 | 1 | 4 | 2 |
|    | <b>Rev2</b>               | 7 | 7 | 7 | 6 | 5 | 1 | 7 | 7 | 7 | 7 | 4 | 5 | 2 | 5 | 6 | 7 | 7 | 1 | 1 | 1 | 1 | 4 | 4 |
|    | <b>Rev3</b>               | 5 | 7 | 7 | 5 | 5 | 2 | 7 | 6 | 6 | 6 | 2 | 3 | 2 | 1 | 5 | 6 | 6 | 3 | 1 | 1 | 1 | 3 | 6 |
|    | <b>Rev4</b>               | 7 | 7 | 7 | 5 | 5 | 1 | 7 | 6 | 6 | 6 | 4 | 5 | 1 | 1 | 5 | 6 | 6 | 1 | 1 | 1 | 1 | 3 | 6 |
|    | <b>TRA_2016 [38]</b>      |   |   |   |   |   |   |   |   |   |   |   |   |   |   |   |   |   |   |   |   |   |   |   |
|    | <b>Rev1</b>               | 5 | 3 | 7 | 5 | 1 | 4 | 1 | 1 | 1 | 1 | 6 | 2 | 2 | 1 | 6 | 7 | 7 | 1 | 1 | 2 | 1 | 1 | 1 |
|    | <b>Rev2</b>               | 6 | 3 | 7 | 5 | 1 | 7 | 1 | 1 | 1 | 2 | 6 | 2 | 1 | 1 | 6 | 7 | 7 | 1 | 3 | 3 | 1 | 1 | 1 |
|    | <b>Rev3</b>               | 6 | 3 | 7 | 5 | 3 | 1 | 1 | 2 | 1 | 1 | 5 | 4 | 1 | 1 | 5 | 6 | 6 | 1 | 1 | 2 | 1 | 1 | 1 |
|    | <b>Rev4</b>               | 6 | 5 | 7 | 5 | 1 | 3 | 1 | 1 | 1 | 1 | 5 | 2 | 1 | 1 | 5 | 6 | 6 | 1 | 1 | 2 | 1 | 1 | 1 |
|    | <b>UTAustin_2009 [52]</b> |   |   |   |   |   |   |   |   |   |   |   |   |   |   |   |   |   |   |   |   |   |   |   |
|    | <b>Rev1</b>               | 7 | 3 | 7 | 4 | 1 | 4 | 4 | 1 | 7 | 3 | 4 | 5 | 2 | 1 | 3 | 4 | 4 | 1 | 1 | 1 | 1 | 4 | 2 |

1  
2  
3  
4  
5  
6  
7  
8  
9  
10  
11  
12  
13  
14  
15  
16  
17  
18  
19  
20  
21  
22  
23  
24  
25  
26  
27  
28  
29  
30  
31  
32  
33  
34  
35  
36  
37  
38  
39  
40  
41  
42  
43  
44  
45  
46

|             |   |   |   |   |   |   |   |   |   |   |   |   |   |   |   |   |   |   |   |   |   |   |   |
|-------------|---|---|---|---|---|---|---|---|---|---|---|---|---|---|---|---|---|---|---|---|---|---|---|
| <b>Rev2</b> | 7 | 3 | 7 | 2 | 1 | 4 | 4 | 1 | 7 | 2 | 4 | 5 | 2 | 1 | 5 | 6 | 7 | 2 | 3 | 1 | 1 | 4 | 1 |
| <b>Rev3</b> | 7 | 2 | 7 | 2 | 1 | 4 | 4 | 1 | 7 | 1 | 6 | 5 | 2 | 1 | 6 | 6 | 7 | 1 | 1 | 1 | 1 | 4 | 1 |
| <b>Rev4</b> | 7 | 3 | 7 | 4 | 1 | 4 | 5 | 5 | 7 | 4 | 3 | 6 | 2 | 1 | 5 | 5 | 3 | 1 | 1 | 2 | 1 | 4 | 1 |

For peer review only

1  
2  
3  
4  
5  
6  
7  
8  
9  
10  
11  
12  
13  
14  
15  
16  
17  
18  
19  
20  
21  
22  
23  
24  
25  
26  
27  
28  
29  
30  
31  
32  
33  
34  
35  
36  
37  
38  
39  
40  
41  
42  
43  
44  
45  
46

For peer review only

**Supplementary Table 8. Summary of recommendations for the diagnosis of gout and hyperuricemia by included guidance document**

IE: insufficient evidence; MSU: monosodium urate; NA: not applicable; NG: not given; SUA: serum uric acid.

|                                                                          | SAMA_2003 [51] | EULAR_2006 [18] | MOH_MSR_AMM_2008 [49] | PRA_2008 [50] | EULAR_2011 [17] | JSGNAM_2011 [48] | CCCP_2012 [47] | 3e_2013 [36] | CSE_2013 [37] | SER_2013 [46] | SIR_2013 [45] | 3e_PT_2014 [40] | 3e_AU_NZ_2015 [43] | ACR_EULAR_2015 [42] | CRA_2016 [41] | TRA_2016 [38] | ACP_2017 [19, 20] | CRA_multi_2017 [22] |
|--------------------------------------------------------------------------|----------------|-----------------|-----------------------|---------------|-----------------|------------------|----------------|--------------|---------------|---------------|---------------|-----------------|--------------------|---------------------|---------------|---------------|-------------------|---------------------|
| <b>Diagnosis of gout</b>                                                 | +              | +               | +                     | NG            | +               | NG               | NG             | +            | NG            | +             | NG            | +               | +                  | +                   | +             | +             | +                 | +                   |
| _Clinical manifestations                                                 | +              | +               | +                     | NA            | +               | NA               | NA             | +            | NA            | +             | NA            | +               | +                  | +                   | +             | +             | +                 | +                   |
| _Laboratory results                                                      | +              | +               | -                     | NA            | +               | NA               | NA             | +            | NA            | +             | NA            | +               | +                  | +                   | +             | +             | +                 | +                   |
| _Imaging results                                                         | -              | +*              | -                     | NA            | -               | NA               | NA             | +            | NA            | +             | NA            | +               | +                  | +                   | +             | +             | IE                | +                   |
| _MSU crystal as definitive diagnosis                                     | +              | +               | +                     | NA            | +               | NA               | NA             | +            | NA            | +             | NA            | +               | +                  | +                   | +             | +             | +                 | +                   |
| Monitor urate deposits clearance by imaging                              | -              | -               | -                     | -             | -               | -                | -              | -            | -             | IE            | -             | -               | -                  | +                   | -             | -             | -                 | +                   |
| Is the timing to assess urate deposits with imaging techniques provided? | -              | -               | -                     | -             | -               | -                | -              | -            | -             | -             | -             | -               | -                  | -                   | -             | -             | -                 | -                   |
| SUA for hyperuricemia, $\mu\text{mol/L}$ [mg/dL]                         | +              | NG              | +                     | +             | +               | +                | +              | NG           | +             | +             | +             | NG              | NG                 | NG                  | NG            | +             | NG                | +                   |
| _All gender                                                              | 420            | NG              | NG                    | NG            | [6.8]           | [7.0]            | 420 [7.0]      | NG           | NG            | NG            | 404 [6.8]     | NG              | NG                 | NG                  | NG            | [7.0]         | NG                | NG                  |
| _Female                                                                  | NG             | NG              | 360 [6.0]             | 357 [6.0]     | NG              | NG               | NG             | NG           | 360           | [6.0]         | NG            | NG              | NG                 | NG                  | NG            | NG            | NG                | 360                 |
| _Male                                                                    | NG             | NG              | 420 [7.0]             | 416 [7.0]     | NG              | NG               | NG             | NG           | 420           | [7.0]         | NG            | NG              | NG                 | NG                  | NG            | NG            | NG                | 420                 |
| <b>Diagnosis of asymptomatic hyperuricemia</b>                           | NG             | NG              | +                     | +             | NG              | +                | +              | +            | NG            | +             | NG            | NG              | NG                 | NG                  | NG            | +             | NG                | NG                  |
| _Gout flare                                                              | NA             | NA              | -                     | +             | NA              | +                | +              | +            | NA            | +             | NA            | NA              | NA                 | NA                  | NA            | +             | NA                | NA                  |
| _Tophi                                                                   | NA             | NA              | -                     | -             | NA              | +                | -              | +            | NA            | -             | NA            | NA              | NA                 | NA                  | NA            | -             | NA                | NA                  |
| _Additional medical conditions†                                          | NA             | NA              | +                     | +             | NA              | +                | +              | -            | NA            | -             | NA            | NA              | NA                 | NA                  | NA            | +             | NA                | NA                  |

\*Imaging results are considered for chronic gout, but not for early/acute gout.

†Additional medical conditions considered in the definition of asymptomatic hyperuricemia included complications of gout [47], renal disorder [48], signs or symptoms of

1  
2  
3 urate deposition [49], and uric acid nephrolithiasis [50]. One document provided a general statement of any clinical presentations [38]. One document explicitly stated that  
4 the inclusion of patients with pre-existing renal or cardiovascular disease was allowed [36].  
5  
6  
7  
8  
9  
10  
11  
12  
13  
14  
15  
16  
17  
18  
19  
20  
21  
22  
23  
24  
25  
26  
27  
28  
29  
30  
31  
32  
33  
34  
35  
36  
37  
38  
39  
40  
41  
42  
43  
44  
45  
46

For peer review only

**Supplementary Table 9. Summary of recommendations for the treatment of hyperuricemia by included guidance documents**

A: allopurinol; Aft: (to initiate ULT) after an acute attack; B: benzbromarone; CCR: creatinine clearance rate; Cr: serum creatinine; CKD: chronic kidney disease; D: (to initiate ULT) during an acute attack; eGFR: estimated glomerular filtration rate; F: febuxostat; IE: insufficient evidence; m: month(s); NA: not applicable; NG: not given; P: probenecid; RF: renal function; SUA: serum uric acid; U: uricosurics without specification; ULT: urate lowering therapy; w: week(s); y: year.

|                                                                       | SAMA_2003 [51] | MOH_MSR_AMM_2008 [49] | PRA_2008 [50] | UTAustin_2009 [52] | EULAR_2011 [17] | JSGNAM_2011 [48] | ACR_2012 [14, 15] | CCCP_2012 [47] | 3e_2013 [36] | CSE_2013 [37] | SER_2013 [46] | SIR_2013 [45] | 3e_PT_2014 [40] | FMOH_2014 [44] | 3e_AU_NZ_2015 [43] | CRA_2016 [41] | EULAR_2016 [16] | T2T_2016 [39] | TRA_2016 [38] | ACP_2017 [19, 20] | BSR_2017 [21] | CRA_multi_2017 [22] |
|-----------------------------------------------------------------------|----------------|-----------------------|---------------|--------------------|-----------------|------------------|-------------------|----------------|--------------|---------------|---------------|---------------|-----------------|----------------|--------------------|---------------|-----------------|---------------|---------------|-------------------|---------------|---------------------|
| Upper limit for target SUA, $\mu\text{mol/L}$ [mg/dL]                 |                |                       |               |                    |                 |                  |                   |                |              |               |               |               |                 |                |                    |               |                 |               |               |                   |               |                     |
| _General target*                                                      | 300            | 360 [6.0]             | [6.0]         | NG                 | [6.0]           | [6.0]            | [6.0]             | 357 [6.0]      | 360 [6.0]    | 360           | [6.0]         | 360 [6.0]     | 360 [6.0]       | NG             | 360 [6.0]          | 360 [6.0]     | 360 [6.0]       | 360 [6.0]     | 360 [6.0]     | NG                | 360           | 360 [6.0]           |
| _Target for serve cases†                                              | NG             | NG                    | NG            | NG                 | [4.0]           | NG               | [5.0]             | NG             | 300          | 300           | NG            | NG            | 300 [5.0]       | NG             | 300                | NG            | 300 [5.0]       | 300 [5.0]     | 300 [5.0]     | NG                | 300           | 300 [5.0]           |
| Lower limit for target SUA, $\mu\text{mol/L}$ [mg/dL]                 | NG             | NG                    | NG            | NG                 | NG              | NG               | NG                | NG             | NG           | NG            | NG            | NG            | NG              | NG             | NG                 | NG            | [3.0]           | NG            | NG            | NG                | NG            | 180                 |
| Drinking water                                                        | -              | +                     | +             | -                  | -               | +                | -                 | +              | -            | +             | +             | -             | -               | +              | -                  | +             | -               | -             | +             | -                 | +             | +                   |
| Urine alkalinisation                                                  | +              | +                     | -             | -                  | +               | -                | +                 | +              | -            | +             | +             | -             | +               | +              | -                  | +             | -               | -             | +             | -                 | +             | +                   |
| Indications for ULT                                                   | +              | +                     | +             | -                  | +               | +                | +                 | +              | -            | +             | +             | +             | -               | NG             | -                  | +             | +               | -             | +             | +                 | +             | +                   |
| _Recurrent attacks                                                    | +, >2          | +, >3/y               | +             | NA                 | +, >1/y         | +                | +, $\geq 2/y$     | -              | NA           | -             | -             | +             | NA              | NG             | -                  | +, >2/y       | +, $\geq 2/y$   | NA            | -             | +, $\geq 2/y$     | +, $\geq 2/y$ | +                   |
| _Tophi                                                                | +              | +                     | +             | NA                 | +               | +                | +                 | -              | NA           | -             | -             | +             | NA              | NG             | NA                 | +             | +               | NA            | +             | +                 | +             | +                   |
| _Urate nephrolithiasis                                                | -              | +                     | +             | NA                 | +               | -                | +                 | -              | NA           | +             | -             | -             | NA              | NG             | NA                 | -             | +               | NA            | +             | +                 | +             | +                   |
| _Arthropathy                                                          | -              | +                     | -             | NA                 | +               | -                | -                 | -              | NA           | -             | -             | +             | NA              | NG             | NA                 | +             | +               | NA            | +             | -                 | +             | +                   |
| _Comorbidities‡                                                       | -              | +                     | +             | NA                 | -               | -                | +                 | +              | NA           | +             | -             | -             | NA              | NG             | NA                 | -             | +               | NA            | -             | +                 | +             | +                   |
| _Others§                                                              | +              | +                     | +             | NA                 | -               | -                | -                 | +              | NA           | -             | +             | -             | NA              | NG             | NA                 | -             | +               | NA            | -             | -                 | +             | +                   |
| Initiate ULT during or after an acute attack (Aft[time after attack]) | Aft            | Aft                   | NG            | Aft (4-6 w)        | Aft             | Aft (2w)         | D                 | NA             | Aft          | D/ Aft (2w)   | NG            | NG            | Aft             | NG             | NG                 | NG            | IE              | IE            | Aft           | NG                | Aft           | Aft                 |
| First line ULT drug(s)                                                | NG             | A                     | A             | NG                 | A, F            | A, B             | A, F              | NG             | A            | NG            | A, F,         | A             | A               | NG             | A                  | NG            | A               | NG            | NG            | NG                | A             | NG                  |

|                                                                                          |        |         |    |    |     |           |         |              |          |         |         |         |            |    |           |       |      |     |       |        |          |            |    |    |
|------------------------------------------------------------------------------------------|--------|---------|----|----|-----|-----------|---------|--------------|----------|---------|---------|---------|------------|----|-----------|-------|------|-----|-------|--------|----------|------------|----|----|
|                                                                                          |        |         |    |    |     |           |         |              |          |         | B       |         |            |    |           |       |      |     |       |        |          |            |    |    |
| <b>Second line ULT drug(s)</b>                                                           | NG     | P       | NG | NG | P   | NG        | P       | NG           | U, F     | NG      | NG      | F, P, B | F, B, P, U | NG | P, B, F   | NG    | F, U | NG  | NG    | NG     | F        | NG         |    |    |
| <b>Allopurinol use</b>                                                                   |        |         |    |    |     |           |         |              |          |         |         |         |            |    |           |       |      |     |       |        |          |            |    |    |
| <b>_Maximum dose (mg/d)</b>                                                              | 300    | NG      | NG | NG | 800 | NG        | 800     | 600          | NG       | 600     | 800-900 | 800     | NG         | NG | 900       | NG    | NG   | NG  | 800   | NG     | 900      | 600        |    |    |
| <b>_RF to initiate dose adjustment (eGFR in ml/min/1.73m<sup>2</sup>, CCr in mL/min)</b> | CCr 60 | CCr 80  | NG | NG | NG  | NG        | CK D4   | NG           | NG       | CCr 60  | CCr 140 | CCr 20  | NG         | NG | NG        | NG    | NG   | NG  | NG    | NG     | eGFR 130 | 1.5mg/eGFR |    |    |
| <b>_Starting dose in normal RF (mg/d)</b>                                                | 50-100 | 100-150 | NG | NG | 100 | 50        | ≤100    | 50           | NG       | 100-150 | NG      | 100     | NG         | NG | NG        | 100   | 100  | NG  | 100   | 50-100 | 200      | 50-100     |    |    |
| <b>_HLA-B*5801 gene screening</b>                                                        | -      | -       | -  | -  | -   | -         | +       | -            | -        | +       | -       | -       | -          | NG | -         | -     | -    | -   | +     | -      | +        | +          |    |    |
| <b>Prophylaxis before ULT</b>                                                            | +      | NG      | NG | NG | +   | NG        | NG      | NG           | NG       | NG      | NG      | NG      | NG         | NG | NG        | NG    | NG   | NG  | NG    | NG     | NG       | NG         | NG | NG |
| <b>Prophylaxis with ULT</b>                                                              | +      | +       | NG | NG | +   | +         | +       | NG           | +        | +       | +       | +       | +          | NG | +         | +     | +    | +   | +     | +      | +        | +          | +  | +  |
| <b>Duration for prophylaxis</b>                                                          | 1-3 m  | 1-6 m** | NG | NG | NG  | NG        | 3-6 m†† | NG           | Un-clear | 6m      | >6m     | NG      | >6m        | NG | Vari-ed‡‡ | 3-6 m | NG   | >6m | 3-6 m | >8w    | <6m      | 3-6m       |    |    |
| <b>Pharmacological ULT for asymptomatic hyperuricemia?</b>                               | -      | +       | NG | -  | -   | +         | IE      | +            | IE       | IE      | NG      | NG      | -§§        | NG | IE        | NG    | NG   | IE  | -     | NG     | -        | NG         |    |    |
| <b>_Comorbidities</b>                                                                    | NA     | -       | NA | NA | NA  | +         | NA      | +            | NA       | NA      | NA      | NA      | -          | NG | NA        | NA    | NA   | NA  | NA    | NA     | NA       | NA         | NA | NA |
| <b>_SUA cut-offs, μmol/L [mg/dL]</b>                                                     | NA     | [10-13] | NA | NA | NA  | [8.0-9.0] | NA      | [8.0-9.0]*** | NA       | NA      | NA      | NA      | [9.0]      | NG | NA        | NA    | NA   | NA  | NA    | NA     | NA       | NA         | NA | NA |

\* The general target was the target serum uric acid level for long term control recommended for all patients on pharmacological urate lowering therapy.

† The intensive target the intensive target was the target serum uric acid level for long term control recommended for patients with tophi [16, 17, 22, 36, 38, 40, 43], with recurrent attacks [16, 21, 22], or with chronic gouty arthritis [16, 22], or to prevent crystal formation [21], or to improve gout signs and symptoms [14, 15]. One document provided stricter target for any patient with gout [37], and one for patients with severe gout without clear definition [39].

‡ Comorbidities considered as the indication for ULT include renal impairment [14-16, 19-22, 37, 49, 50], cardiovascular risk or cardiovascular diseases [16, 22, 47], glucose intolerance or DM, lipid disorder, and obesity [22].

§ Others indications considered for pharmacological ULT include joint damage [21], diuretic therapy use [21], young age [16, 21, 22] with some documents defined as less than 40 years old [16, 22], high SUA level defined as >8mg/dL (480 μmol/L) [16] or >13mg/dl [50], impending cytotoxic chemotherapy or radiotherapy for lymphoma or

1  
2  
3 leukaemia [49], persistently raised uric acid levels and willingness to continue lifelong therapy [51]. Some documents evaluated SUA levels in patients after lifestyle  
4 modification and indicated pharmacological ULT in individuals with SUA above 6 mg/dL [46], or with SUA above 8mg/dl with CV risk or CVD and above 9mg/dl without  
5 CV risk or CVD [47].  
6

7 || The starting dose of allopurinol in patients with renal impairment should not exceed 1.5mg/eGFR.

8 ¶ Prophylaxis should be continued until the serum urate is normal and the patient has not had any attacks for 1-3 months.

9 \*\* Prophylaxis should be continued until 6 months free of acute attacks or until 1 month with target serum urate level achieved.

10 †† Prophylaxis should be continued for 1) 6 months' duration, 2) 3 months after achieving the target serum urate level for the patient without tophi detected on physical  
11 examination, or 3) 6 months after achieving the target serum urate level, where there has been resolution of tophi previously detected on physical examination.

12 ‡ The duration for prophylaxis varied and depends on the presence of tophi and comorbidities and on serum urate response. But prophylaxis should be continued until the  
13 target SUA is reached or until the tophi has resolved.

14 §§ The recommendations provided were conflict within the same document.

15 ||| Pharmacological urate lowering therapy is recommended in male patients with serum uric acid >13 mg/dL and in female patients with serum uric acid >10 mg/dL.

16 ¶¶ Pharmacological urate lowering therapy is recommended in patients with serum uric acid >8 mg/dL if with complications or >9 mg/dL in all patients.

17 \*\*\* Pharmacological urate lowering therapy is recommended in patients with serum uric acid >8 mg/dL if with cardiovascular disease or cardiovascular risk factors or >9  
18 mg/dL if without cardiovascular disease or cardiovascular risk factors.  
19  
20  
21  
22  
23  
24  
25  
26  
27  
28  
29  
30  
31  
32  
33  
34  
35  
36  
37  
38  
39  
40  
41  
42  
43  
44  
45  
46



**Supplementary Table 10. Summary of recommendations for the treatment of acute gout by included guidance documents**

NG: not given; NSAIDs: non-steroidal anti-inflammatory drugs.

|                              | What is the first line pharmacological treatment option? | Is colchicine recommended to be given as a fixed dose or as a loading dose + followed doses? | Is intra-articular steroids recommended? | What are the indications for intra-articular steroids? | Which line is intra-articular steroids recommended to be? | Is systemic steroids recommended? | What are the indications for systemic steroids?                                                                                                                | Which line of option is systemic steroids recommended to be? |
|------------------------------|----------------------------------------------------------|----------------------------------------------------------------------------------------------|------------------------------------------|--------------------------------------------------------|-----------------------------------------------------------|-----------------------------------|----------------------------------------------------------------------------------------------------------------------------------------------------------------|--------------------------------------------------------------|
| <b>SAMA_2003 [51]</b>        | NSAIDs                                                   | Loading dose + followed doses                                                                | Yes                                      | Contraindicated to NSAIDs and joint accessible         | NG                                                        | Yes                               | Contraindicated or not responding to NSAIDs or polyarthritis                                                                                                   | NG                                                           |
| <b>MOH_MSR_AMM_2008 [49]</b> | NSAIDs                                                   | NG                                                                                           | Yes                                      | NG                                                     | NG                                                        | Yes                               | Elderly people, renal insufficiency, hepatic dysfunction, cardiac failure, peptic ulcer disease, and hypersensitivity to NSAIDs                                | NG                                                           |
| <b>PRA_2008 [50]</b>         | NSAIDs                                                   | NG                                                                                           | NG                                       | NG                                                     | NG                                                        | Yes                               | Contraindicated to NSAIDs                                                                                                                                      | NG                                                           |
| <b>UTAustin_2009 [52]</b>    | NSAIDs                                                   | Loading dose + followed doses                                                                | Yes                                      | Only 1-2 joints is involved                            | Third                                                     | Yes                               | Contraindicated or not responding to NSAIDs and colchicine and polyarthritis                                                                                   | Third                                                        |
| <b>EULAR_2011 [17]</b>       | Colchicine, NSAIDs, glucocorticoids                      | Loading dose + followed doses                                                                | Yes                                      | NG                                                     | NG                                                        | Yes                               | Contraindications to NSAIDs and colchicine                                                                                                                     | First                                                        |
| <b>JSGNAM_2011 [48]</b>      | Colchicine, NSAIDs                                       | Fixed                                                                                        | NG                                       | NG                                                     | NG                                                        | Yes                               | Contraindicated or not responding to NSAIDs or polyarthritis                                                                                                   | Second                                                       |
| <b>ACR_2012 [14, 15]</b>     | NSAIDs, corticosteroids, colchicine                      | Loading dose + followed doses                                                                | Yes                                      | Involvement of 1 or 2 large joints                     | First                                                     | Yes                               | Oral steroids for involvement of 1 or 2 joints or when intra-articular joint injection is impractical. Intravenous steroids for the nothing by mouth patients. | First                                                        |
| <b>3e_2013 [36]</b>          | NSAIDs, colchicine, glucocorticoids                      | NG                                                                                           | Yes                                      | NG                                                     | First                                                     | Yes                               | NG                                                                                                                                                             | First                                                        |
| <b>CSE_2013 [37]</b>         | NSAIDs, colchicine,                                      | NG                                                                                           | NG                                       | NG                                                     | NG                                                        | NG                                | NG                                                                                                                                                             | NG                                                           |

|                            |                                           |                                           |     |                                                                                           |       |     |                                                                                        |        |
|----------------------------|-------------------------------------------|-------------------------------------------|-----|-------------------------------------------------------------------------------------------|-------|-----|----------------------------------------------------------------------------------------|--------|
|                            | corticosteroids                           |                                           |     |                                                                                           |       |     |                                                                                        |        |
| <b>SER_2013 [46]</b>       | NSAIDs                                    | NG                                        | Yes | Monoarthritis                                                                             | NG    | Yes | Contraindicated to NSAIDs                                                              | NG     |
| <b>SIR_2013 [45]</b>       | NSAIDs,<br>colchicine                     | NG                                        | Yes | NG                                                                                        | NG    | Yes | Intolerance or contraindications to NSAIDs and colchicine                              | NG     |
| <b>3e_PT_2014 [40]</b>     | Colchicine,<br>NSAIDs                     | Fixed low dose                            | Yes | NG                                                                                        | NG    | Yes | NG                                                                                     | NG     |
| <b>FMOH_2014 [44]</b>      | NG                                        | NG                                        | NG  | NG                                                                                        | NG    | NG  | NG                                                                                     | NG     |
| <b>3e_AU_NZ_2015 [43]</b>  | NSAIDs,<br>colchicine,<br>glucocorticoids | NG                                        | Yes | NG                                                                                        | First | Yes | NG                                                                                     | First  |
| <b>CRA_2016 [41]</b>       | NSAIDs                                    | NG                                        | NG  | NG                                                                                        | NG    | Yes | Contraindications to NSAIDs and colchicine                                             | NG     |
| <b>EULAR_2016 [16]</b>     | Colchicine,<br>NSAIDs,<br>corticosteroid  | Loading dose +<br>followed doses          | Yes | NG                                                                                        | First | Yes | NG                                                                                     | First  |
| <b>T2T_2016 [39]</b>       | Anti-inflammatory<br>medications          | NG                                        | NG  | NG                                                                                        | NG    | NG  | NG                                                                                     | NG     |
| <b>TRA_2016 [38]</b>       | NSAIDs                                    | Fixed or Loading dose<br>+ followed doses | Yes | Involvement of 1-2 major<br>joints, contraindications<br>to both colchicine and<br>NSAIDs | NG    | Yes | Contraindications to NSAIDs and colchicine                                             | NG     |
| <b>ACP_2017 [19, 20]</b>   | Corticosteroids                           | Loading dose +<br>followed doses          | NG  | NG                                                                                        | NG    | Yes | If not contraindicated.                                                                | First  |
| <b>BSR_2017 [21]</b>       | NSAIDs,<br>colchicine                     | NG                                        | Yes | Patients with acute illness<br>and comorbidity                                            | First | Yes | Intolerance to NSAIDs and colchicine and<br>intra-articular injection is not feasible. | Second |
| <b>CRA_multi_2017 [22]</b> | NSAIDs,<br>colchicine                     | Loading dose +<br>followed doses          | Yes | Involvement of 1-2 major<br>joints and not responding<br>to systemic treatment            | NG    | Yes | Contraindicated to or not responding to<br>NSAIDs and colchicine                       | NG     |

**Supplementary Table 11. Summary of recommendations for the treatment of tophi by included guidance documents**

A: allopurinol; B: benzbromarone; F: febuxostat; NA: not applicable; NG: not given; P: pegloticase; R: rasburicase; ULT: urate lowering therapy; WH: wound healing.

|                                      | SAMA_2003 [51] | MOH_MSR_AMM_2008 [49] | PRA_2008 [50] | UTAustin_2009 [52] | EULAR_2011 [17] | JSGNAM_2011 [48] | ACR_2012 [14, 15] | 3e_2013 [36] | CSE_2013 [37] | SER_2013 [46] | SIR_2013 [45] | 3e_PT_2014 [40] | FMOH_2014 [44] | 3e_AU_NZ_2015 [43] | CRA_2016 [41] | EULAR_2016 [16] | T2T_2016 [39] | TRA_2016 [38] | ACP_2017 [19, 20] | BSR_2017 [21] | CRA_multi_2017 [22] |
|--------------------------------------|----------------|-----------------------|---------------|--------------------|-----------------|------------------|-------------------|--------------|---------------|---------------|---------------|-----------------|----------------|--------------------|---------------|-----------------|---------------|---------------|-------------------|---------------|---------------------|
| <b>Is surgery recommended?</b>       | +              | +                     | NG            | NG                 | NG              | +                | NG                | +            | NG            | NG            | NG            | +               | NG             | +                  | NG            | NG              | IE            | +             | NG                | -             | +                   |
| <b>Indications for surgery</b>       | NG             | +                     | NG            | NG                 | NG              | NG               | NG                | +            | NG            | NG            | NG            | NG              | NG             | +                  | NG            | NG              | NG            | +             | NG                | NG            | +                   |
| <b>_Nerve compression</b>            | NA             | -                     | NA            | NA                 | NA              | NA               | NA                | +            | NA            | NA            | NA            | NA              | NA             | +                  | NA            | NA              | NA            | +             | NA                | NA            | +                   |
| <b>_Infection</b>                    | NA             | -                     | NA            | NA                 | NA              | NA               | NA                | +            | NA            | NA            | NA            | NA              | NA             | +                  | NA            | NA              | NA            | +             | NA                | NA            | -                   |
| <b>_Mechanical impingement</b>       | NA             | -                     | NA            | NA                 | NA              | NA               | NA                | +            | NA            | NA            | NA            | NA              | NA             | +                  | NA            | NA              | NA            | -             | NA                | NA            | -                   |
| <b>_Loss of mobility</b>             | NA             | +                     | NA            | NA                 | NA              | NA               | NA                | -            | NA            | NA            | NA            | NA              | NA             | -                  | NA            | NA              | NA            | +             | NA                | NA            | -                   |
| <b>_Severe pain</b>                  | NA             | +                     | NA            | NA                 | NA              | NA               | NA                | -            | NA            | NA            | NA            | NA              | NA             | -                  | NA            | NA              | NA            | +             | NA                | NA            | -                   |
| <b>_Tophaceous ulcer</b>             | NA             | +                     | NA            | NA                 | NA              | NA               | NA                | -            | NA            | NA            | NA            | NA              | NA             | -                  | NA            | NA              | NA            | -             | NA                | NA            | +                   |
| <b>_Others*</b>                      | NA             | +                     | NA            | NA                 | NA              | NA               | NA                | -            | NA            | NA            | NA            | NA              | NA             | -                  | NA            | NA              | NA            | +             | NA                | NA            | +                   |
| <b>Risks of surgery</b>              | WH             | NG                    | NG            | NG                 | NG              | NG               | NG                | NG           | NG            | NG            | NG            | NG              | NG             | NG                 | NG            | NG              | NG            | NG            | NG                | NG            | NG                  |
| <b>Is long-term ULT recommended?</b> | +              | +                     | +             | NG                 | +               | +                | +                 | +            | +             | +             | +             | +               | NG             | +                  | +             | +               | +             | +             | +                 | +             | +                   |
| <b>Is any ULT drug recommended?</b>  | A              | -                     | -             | -                  | P               | -                | P                 | -            | B             | F             | NA            | -               | -              | P                  | -             | P               | -             | -             | -                 | P, R          | -                   |

\* Other indications for surgery include large tophi [22], persistent tophi [22], joint deformation [38], major joint destruction [49], pressure symptoms [49], and cosmetic [49].

Supplementary Figure 1. Standardized domain scores by the year of publication



## Supplementary File 1. Instructions for Guideline Appraisal Using the AGREE II Instrument

### TRAINING MATERIALS

- Online tutorial: <http://www.agreetrust.org/resource-centre/agree-ii-training-tools/>
- User's Manual:  
[http://www.agreetrust.org/wp-content/uploads/2013/06/AGREE\\_II\\_Users\\_Manual\\_and\\_23-item\\_Instrument\\_ENGLISH.pdf](http://www.agreetrust.org/wp-content/uploads/2013/06/AGREE_II_Users_Manual_and_23-item_Instrument_ENGLISH.pdf)

### PROLOGUE

- The Appraisal of Guidelines for REsearch & Evaluation (AGREE) Instrument is an international, validated and rigorously developed tool to evaluate the quality of clinical practice guidelines and consensus statements.
- The AGREE II instrument was published in 2010 and consists of 23 key items organized within 6 domains followed by 2 global rating items (“Overall Assessment”). Each domain captures a unique dimension of guideline quality.
  - Scope and purpose
  - Stakeholder involvement
  - Rigour of development
  - Clarity of presentation
  - Applicability
  - Editorial independence.
- Reviewers score each item on a 7-point Likert Scale.
  - 1 - Strongly disagree
  - 7 - Strongly agree
  - For the majority of items, we use an ‘add-up’ strategy to score, that is, corresponding scores will be added to 1’ if information on predefined aspects is provided. For only one item, we subtract scores from 7’.
- Domain scores will be calculated as: (obtained score-minimal possible score)/(maximal possible score-minimal possible score)

### DETAILED INSTRUCTIONS FOR SCORING

(adapted from AGREE II User’s Manual [28])

#### Domain 1 Scope and Purpose

**Item 1 Objectives: The overall objective(s) of the guideline is (are) specifically described.**

#### Instructions:

Information on three aspects should be provided (add corresponding scores for each aspect, 5’ in total):

a) Health intent, i.e., prevention, screening, diagnosis, treatment, etc. (2’);

b) Expected benefit or outcome (2’);

- *Clarification:* If gout epidemiology is provided as background information (i.e., the importance or significance of the diagnosis and management of gout/hyperuricemia is stated), 1’ will be given. If clear statements, such as “to prevent (long term) complications of patients with diabetes mellitus” “to lower the risk of subsequent vascular events in patients with previous myocardial infarction”, are provided, 2’ will be given.

c) Target, e.g., patient population, society (1’).

Performance: Is the item well written and is the content easy to find? (1’)

1  
2 Related *Report Criteria* from *User's Manual*: • health intent(s) (i.e., prevention, screening, diagnosis,  
3 treatment, etc.) • expected benefit or outcome • target(s) (e.g., patient population, society)  
4

5  
6 **Item 2 Questions: The health question(s) covered by the guideline is (are) specifically described.**

7 Instructions:

8 Information on five aspects should be provided (add corresponding scores for each aspect, 5' in total):

- 9  
10 a) Target population (2');  
11 b) Intervention or exposure (if appropriate, 1');  
12 c) Comparisons (if appropriate, 1');  
13 d) Outcome (1');  
14 e) Health care setting or context (1').

15  
16 Performance: Is the item well written and is the content easy to find? (1')

17  
18  
19 Note:

- 20 1) If c) is not appropriate, no score will be subtracted.  
21 2) It is not necessary to have this information provided in questions. Reviewers can try to paraphrase  
22 2-3 key recommendations into questions to see the information above is provided and score based  
23 on paraphrased questions.  
24  
25

26 Related *Report Criteria* from *User's Manual*: • target population • intervention(s) or exposure(s) •  
27 comparisons (if appropriate) • outcome(s) • health care setting or context  
28  
29

30  
31 **Item 3 Population: The population (patients, public, etc.) to whom the guideline is meant to apply  
32 is specifically described.**

33 Instructions:

34 A default full score (7') should be considered. Subtract 1-2 points where the population is not clearly  
35 described or where the descriptions in the guideline is contradictory (e.g., a guideline stating "to treat  
36 asymptomatic hyperuricaemia" in the introduction, while stating "to treat hyperuricaemia and gout" in the  
37 title and providing no specific definition of patients' condition in recommendations).  
38  
39  
40  
41

42 Related *Report Criteria* from *User's Manual*: • target population, gender and age • clinical condition (if  
43 relevant) • severity/stage of disease (if relevant) • comorbidities (if relevant) • excluded populations (if  
44 relevant)  
45  
46

47 **Domain 2 Stakeholder Involvement**

48 **Item 4 Group Membership: The guideline development group includes individuals from all  
49 relevant professional groups.**

50 Instructions:

51 Information on two aspects should be provided (add corresponding scores for each aspect, 5' in total):

- 52  
53 a) The guideline development group is stated (1');  
54 b) For each member of the guideline development group, the following information is included (1' each):  
55 name (1'), discipline/content expertise (e.g., neurosurgeon, methodologist, 1'), institution (e.g., St. Peter's  
56 hospital, 1'), a description of the member's role in the guideline development group (1')  
57 - *Clarification*: Please subtract 1' if no methodologist (i.e., epidemiologist) is inferred from the  
58 discipline/content expertise.  
59  
60

Performance: Is the item well written and is the content easy to find? (1')

Note: Where the relation between the guideline development group and the authors is unclear, the authors of the guidance document will be considered as equivalent to the guideline development group.

Related *Report Criteria* from *User's Manual*: • For each member of the guideline development group, the following information is included: name, discipline/content expertise (e.g., neurosurgeon, methodologist), institution (e.g., St. Peter's hospital), geographical location (e.g., Seattle, WA), a description of the member's role in the guideline development group

**Item 5 Target Population Preferences and Views: The views and preferences of the target population (patients, public, etc.) have been sought.**

Instructions:

Information the following four aspects should be provided (add corresponding scores for each aspect, 6' in total):

- a) Statement of type of strategy used to capture patients'/public's' views and preferences (e.g., participation in the guideline development group, literature review of values and preferences, 2');
- b) Methods by which preferences and views were sought (e.g., evidence from literature, surveys, focus groups, 1');
- c) Outcomes/information gathered on patient/public information (2');
- d) Description of how the information gathered was used to inform the guideline development process and/or formation of the recommendations (1')

- *Clarification*: If a patient representative is included in the guideline development panel, scores on aspects a), b), and d) will be given as default.

Related *Report Criteria* from *User's Manual*: • statement of type of strategy used to capture patients'/public's' views and preferences (e.g., participation in the guideline development group, literature review of values and preferences) • methods by which preferences and views were sought (e.g., evidence from literature, surveys, focus groups) • outcomes/information gathered on patient/public information • description of how the information gathered was used to inform the guideline development process and/or formation of the recommendations

**Item 6 Target Users: The target users of the guideline are clearly defined.**

Instructions:

Information on two aspects should be provided (add corresponding scores for each aspect, 6' in total):

- a) Clear description of intended guideline audience (e.g. specialists, family physicians, patients, clinical or institutional leaders/administrators, 3');
- b) Description of how the guideline may be used by its target audience (e.g., to inform clinical decisions, to inform policy, to inform standards of care, 3')

Related *Report Criteria* from *User's Manual*: • clear description of intended guideline audience (e.g. specialists, family physicians, patients, clinical or institutional leaders/administrators) • description of how the guideline may be used by its target audience (e.g., to inform clinical decisions, to inform policy, to inform standards of care)

**Domain 3 Rigour of Development**

**Item 7 Search Methods: Systematic methods were used to search for evidence.**

Instructions:

Information on four aspects should be provided (add corresponding scores for each aspect, 6' in total):

- a) Named electronic database(s) or evidence source(s) where the search was performed (e.g., MEDLINE, EMBASE, PsychINFO, CINAHL, 2');
- b) Time periods searched (e.g., January 1, 2004 to March 31, 2008, 1');
- c) Search terms used (e.g., text words, indexing terms, subheadings, 1');
- d) Full search strategy included (e.g., possibly located in appendix, 2')

Related *Report Criteria* from *User's Manual*: • named electronic database(s) or evidence source(s) where the search was performed (e.g., MEDLINE, EMBASE, PsychINFO, CINAHL) • time periods searched (e.g., January 1, 2004 to March 31, 2008) • search terms used (e.g., text words, indexing terms, subheadings) • full search strategy included (e.g., possibly located in appendix)

### **Item 8 Evidence Selection Criteria: The criteria for selecting the evidence are clearly described.**

#### Instructions:

Information on both inclusion and exclusion criteria should be provided (add corresponding scores for each aspect, 6' in total):

a) Description of the inclusion criteria:

- a1) target population (patient, public, etc.) characteristics (2'),
- a2) study design (2),
- a4) outcomes (1'),

b) Description of the exclusion criteria (if relevant; e.g., French only listed in the inclusion criteria statement could logically preclude non-French listed in the exclusion criteria statement, 1').

Note: if a3), a5), a6), b) is not relevant, no score will be subtracted.

Related *Report Criteria* from *User's Manual*: • description of the inclusion criteria, including: target population (patient, public, etc.) characteristics, study design, comparisons (if relevant), outcomes, language (if relevant), context (if relevant) • description of the exclusion criteria (if relevant; e.g., French only listed in the inclusion criteria statement could logically preclude non-French listed in the exclusion criteria statement)

### **Item 9 Strengths and Limitations of The Evidence: The strengths and limitations of the body of evidence are clearly described.**

#### Instructions:

For each evidence, information on two aspects should be provided. If only some of the evidences report the following information, please first calculate the score based on the most informative evidence (e.g., scored 5'), and then subtract 1' to get the final score (e.g., 5'-1'=4').

For each evidence, both a general statement of the method and detailed descriptions should be provided:

a) A statement of the method used to evaluate the strengths and limitations of the evidence should be provided (3').

b) The stated method should evaluate at least three of the following aspects (add 1' for each aspect, maximum 3'):

- b1) Study design(s);
- b2) Study methodology limitations (e.g., sampling, blinding, allocation concealment, analytical methods);
- b3) Appropriateness/relevance of primary and secondary outcomes considered;
- b4) Consistency of results across studies;
- b5) Direction of results across studies;
- b6) Magnitude of benefit versus magnitude of harm;



1  
2 b7) Applicability to practice context  
3

4 Related *Report Criteria* from *User's Manual*: • descriptions of how the body of evidence was evaluated for  
5 bias and how it was interpreted by members of the guideline development group • aspects upon which to  
6 frame descriptions include: study design(s) included in body of evidence, study methodology limitations  
7 (sampling, blinding, allocation concealment, analytical methods), appropriateness/relevance of primary  
8 and secondary outcomes considered, consistency of results across studies, direction of results across  
9 studies, magnitude of benefit versus magnitude of harm, applicability to practice context  
10  
11  
12

13 **Item 10 Formulation of Recommendations: The methods for formulating the recommendations**  
14 **are clearly described.**

15 Instructions:

16 Information on three aspects should be provide (add 2' for each aspect, 6' in total):

- 17  
18 a) Description of the recommendation development process (e.g., steps used in modified Delphi technique,  
19 voting procedures that were considered, 2');  
20  
21 b) Outcomes of the recommendation development process (e.g., extent to which consensus was reached  
22 using modified Delphi technique, outcome of voting procedures, 2');  
23  
24 c) Description of how the process influenced the recommendations (e.g., results of Delphi technique  
25 influence final recommendation, alignment with recommendations and the final vote, 2')  
26  
27

28 Related *Report Criteria* from *User's Manual*: • description of the recommendation development process  
29 (e.g., steps used in modified Delphi technique, voting procedures that were considered) • outcomes of the  
30 recommendation development process (e.g., extent to which consensus was reached using modified Delphi  
31 technique, outcome of voting procedures) • description of how the process influenced the  
32 recommendations (e.g., results of Delphi technique influence final recommendation, alignment with  
33 recommendations and the final vote)  
34  
35  
36

37 **Item 11 Consideration of Benefits and Harms: The health benefits, side effects, and risks have**  
38 **been considered in formulating the recommendations.**

39 Instructions:

40 For each recommendation, information on four aspects should be provided. If only some of the  
41 recommendations report the following information, please first calculate the score based on the most  
42 informative recommendation (e.g., scored 5'), and subtract 1' to get the final score (e.g., 5'-1'=4').  
43  
44  
45

46 For each recommendation, information on four aspects should be provided (add corresponding scores for  
47 each aspect, 6' in total):

- 48 a) Supporting data and report of benefits (2'); b) Supporting data and report of harms/side effects/risks (2');  
49 - *Clarification*: Data on a) and b) can be provided as references.  
50  
51 c) Reporting of the balance/trade-off between benefits and harms/side effects/risks (1');  
52  
53 d) Recommendations reflect considerations of both benefits and harms/side effects/risks (1')  
54

55 Related *Report Criteria* from *User's Manual*: • supporting data and report of benefits • supporting data and  
56 report of harms/side effects/risks • reporting of the balance/trade-off between benefits and harms/side  
57 effects/risks • recommendations reflect considerations of both benefits and harms/side effects/risks  
58  
59  
60

**Item 12 Link Between Recommendations and Evidence: There is an explicit link between the**  
**recommendations and the supporting evidence.**

**Instructions:**

Information on three aspects should be provided (add 2' for each aspect, 6' in total):

a) The guideline describes how the guideline development group linked and used the evidence to inform recommendations (2');

- *Clarification:* Can be provided as narrative summaries and/or discussions of evidences.

b) Each recommendation is linked to a key evidence description/paragraph and/or reference list (2');

- *Note:* Please subtract 1' if only some recommendations meet criterium b).

c) Recommendations linked to evidence summaries, evidence tables in the results section of the guideline (2')

*Related Report Criteria from User's Manual:* • the guideline describes how the guideline development group linked and used the evidence to inform recommendations • each recommendation is linked to a key evidence description/paragraph and/or reference list • recommendations linked to evidence summaries, evidence tables in the results section of the guideline

**Item 13 External Review: The guideline has been externally reviewed by experts prior to its publication.**

**Instructions:**

Information on five aspects should be provided (add corresponding scores for each aspect, 6' in total):

a) Purpose and intent of the external review (e.g., to improve quality, gather feedback on draft recommendations, assess applicability and feasibility, disseminate evidence, 1');

b) Methods taken to undertake the external review (e.g., rating scale, open-ended questions, 1');

c) Description of the external reviewers (e.g., number, type of reviewers, affiliations, 1');

d) Outcomes/information gathered from the external review (e.g., summary of key findings, 1');

e) Description of how the information gathered was used to inform the guideline development process and/or formation of the recommendations (e.g., guideline panel considered results of review in forming final recommendations, 2')

- *Clarification:* Publication through a peer-reviewed journal can be considered as externally reviewed.

*Note:* If dates of revision and acceptance is provided on the document, it is also considered externally reviewed.

*Related Report Criteria from User's Manual:* • purpose and intent of the external review (e.g., to improve quality, gather feedback on draft recommendations, assess applicability and feasibility, disseminate evidence) • methods taken to undertake the external review (e.g., rating scale, open-ended questions) • description of the external reviewers (e.g., number, type of reviewers, affiliations) • outcomes/information gathered from the external review (e.g., summary of key findings) • description of how the information gathered was used to inform the guideline development process and/or formation of the recommendations (e.g., guideline panel considered results of review in forming final recommendations)

**Item 14 Updating Procedure: A procedure for updating the guideline is provided.**

**Instructions:**

Information on three aspects should be provided (add 2' for each aspect, 6' in total):

a) A statement that the guideline will be updated (2');

b) Explicit time interval or explicit criteria to guide decisions about when an update will occur (2');

c) Methodology for the updating procedure is reported (2')

*Related Report Criteria from User's Manual:* • a statement that the guideline will be updated • explicit

1  
2 time interval or explicit criteria to guide decisions about when an update will occur • methodology for the  
3 updating procedure is reported  
4

#### 5 **Domain 4 Clarity of Presentation**

##### 6 **Item 15 Specific and Unambiguous Recommendations: The recommendations are specific and** 7 **unambiguous.**

###### 8 Instructions:

9  
10 For each recommendation, information on four aspects should be provided. If only some of the  
11 recommendations report the following information, please first calculate the score based on the most  
12 informative recommendation (e.g., scored 5'), and then subtract 1' to get the final score (e.g., 5'-1'=4').  
13  
14

15  
16 For each recommendation, information on four aspects should be provided (add corresponding scores for  
17 each aspect, 6' in total):  
18

19 a) If a recommendation is uncertain, the uncertainty should be reflected in the recommendation and also be  
20 explicitly stated (2')

21 b) Identification of the intent or purpose of the recommended action (e.g., to improve quality of life, to  
22 decrease side effects, 2');  
23

24 - *Clarification:* If the benefit for uric acid lowering in patients with CVD is not clearly stated, the score for  
25 this aspect should not be added.

26 c) Identification of the relevant population (e.g., patients, public, 1');

27 d) Caveats or qualifying statements, if relevant (e.g., patients or conditions for whom the recommendations  
28 would not apply, 1').  
29

30 Note: if c) is not relevant, no score will be subtracted.  
31  
32

33 *Related Report Criteria from User's Manual:* • statement of the recommended action • identification of the  
34 intent or purpose of the recommended action (e.g., to improve quality of life, to decrease side effects) •  
35 identification of the relevant population (e.g., patients, public) • caveats or qualifying statements, if  
36 relevant (e.g., patients or conditions for whom the recommendations would not apply)  
37  
38

##### 39 **Item 16 Management Options: The different options for management of the condition or health issue** 40 **are clearly presented.**

###### 41 Instructions:

42 Information on two aspects should be provided (add 3' for each aspect, 6' in total):  
43

44 a) Description of options (3');

45 b) Description of population or clinical situation most appropriate to each option (3')

46 - *Note:* Please subtract 1' if only some options are provided with the most appropriate population or  
47 clinical situation.  
48  
49

50  
51 *Related Report Criteria from User's Manual:* • description of options • description of population or clinical  
52 situation most appropriate to each option  
53  
54

##### 55 **Item 17 Identifiable Key Recommendations: Key recommendations are easily identifiable.**

###### 56 Instructions:

57 Reporting style should follow two criteria (add 3' for each aspect, 6' in total):  
58

59 a) Description of recommendations in a summarized box, typed in bold, underlined, or presented as flow  
60 charts or algorithms (3');

b) Specific recommendations are grouped together in one section (3')

1  
2 - *Clarification*: If recommendations are summarised in the abstract, scores for aspect b) can also be given.  
3

4 Related *Report Criteria* from *User's Manual*: • description of recommendations in a summarized box,  
5 typed in bold, underlined, or presented as flow charts or algorithms • specific recommendations are  
6 grouped together in one section  
7  
8

## 9 **Domain 5 Applicability**

### 10 **Item 18 Facilitators and Barriers to Application: The guideline describes facilitators and barriers** 11 **to its application.**

#### 12 Instructions:

13 Information on four aspects should be provided (add corresponding scores for each aspect, 6' in total):

14 a) Identification of the types of facilitators and barriers that were considered (2');

15 - *Clarification*: Statements of that certain drugs are not available in certain regions can be considered as  
16 identification of the facilitators and barriers.

17 b) Methods by which information regarding the facilitators and barriers to implementing recommendations  
18 were sought (e.g., feedback from key stakeholders, pilot testing of guidelines before widespread  
19 implementation, 2');

20 c) Information/description of the types of facilitators and barriers that emerged from the inquiry (e.g.,  
21 practitioners have the skills to deliver the recommended care, sufficient equipment is not available to  
22 ensure all eligible members of the population receive mammography, 1');

23 d) Description of how the information influenced the guideline development process and/or formation of  
24 the recommendations (1')

25  
26 Related *Report Criteria* from *User's Manual*: • identification of the types of facilitators and barriers that  
27 were considered • methods by which information regarding the facilitators and barriers to implementing  
28 recommendations were sought (e.g., feedback from key stakeholders, pilot testing of guidelines before  
29 widespread implementation) • information/description of the types of facilitators and barriers that emerged  
30 from the inquiry (e.g., practitioners have the skills to deliver the recommended care, sufficient equipment  
31 is not available to ensure all eligible members of the population receive mammography) • description of  
32 how the information influenced the guideline development process and/or formation of the  
33 recommendations  
34  
35  
36  
37  
38  
39  
40  
41  
42

### 43 **Item 19 Implementation Advice or Tools: The guideline provides advice and/or tools on how the** 44 **recommendations can be put into practice.**

#### 45 Instructions:

46 Information on three aspects should be provided (add corresponding scores for each aspect, 6' in total):

47 a) An implementation section in the guideline (2');

48 b) Tools and resources to facilitate application (add 1' for each tool/resource, maximum 2'): guideline  
49 summary documents, links to check lists/algorithms, links to how-to manuals, solutions linked to barrier  
50 analysis (see Item 18), tools to capitalize on guideline facilitators (see Item 18), outcome of pilot test and  
51 lessons learned;

52 c) Directions on how users can access tools and resources (2')

53  
54 Related *Report Criteria* from *User's Manual*: • an implementation section in the guideline • tools and  
55 resources to facilitate application: guideline summary documents, links to check lists/algorithms, links to  
56 how-to manuals, solutions linked to barrier analysis (see Item 18), tools to capitalize on guideline  
57 facilitators (see Item 18), outcome of pilot test and lessons learned • directions on how users can access  
58  
59  
60

1  
2 tools and resources  
3

4 **Item 20 Resource Implications: The potential resource implications of applying the**  
5 **recommendations have been considered.**

6 - *Clarification:* The aim of this item is to the cost information considered by the guideline.

7 Instructions:

8 Information on four aspects should be provided (add corresponding scores for each aspect, 6' in total):

- 9  
10 a) Identification of the types of cost information that were considered (e.g., economic evaluations, drug  
11 acquisition costs, 2');  
12  
13 b) Methods by which the cost information was sought (e.g., a health economist was part of the guideline  
14 development panel, use of health technology assessments for specific drugs, etc., 2');  
15  
16 c) Information/description of the cost information that emerged from the inquiry (e.g., specific drug  
17 acquisition costs per treatment course, 1');  
18  
19 d) Description of how the information gathered was used to inform the guideline development process  
20 and/or formation of the recommendations (1')

21  
22  
23 Related *Report Criteria* from *User's Manual*: • identification of the types of cost information that were  
24 considered (e.g., economic evaluations, drug acquisition costs) • methods by which the cost information  
25 was sought (e.g., a health economist was part of the guideline development panel, use of health technology  
26 assessments for specific drugs, etc.) • information/description of the cost information that emerged from  
27 the inquiry (e.g., specific drug acquisition costs per treatment course) • description of how the information  
28 gathered was used to inform the guideline development process and/or formation of the recommendations  
29  
30

31 **Item 21 Monitoring or Auditing Criteria: The guideline presents monitoring and/or auditing criteria.**

32 - *Clarification:* The aim of this item is to evaluate the adherence to guidelines, but not to provide follow up  
33 parameters for diseases. *Monitoring* in this item refers to the action to monitor physicians' adherence to the  
34 guideline in daily practice by a group of investigators, but not to monitor the management of the disease in  
35 an individual patient. And the *auditing criteria* are the criteria to assess how well the guideline affects the  
36 practice in a region, but not how well the patients achieve the treatment target.  
37  
38  
39

40 Instructions:

41 Information on four aspects should be provided (add corresponding scores for each aspect, 6' in total):

- 42  
43 a) Identification of criteria to assess guideline implementation or adherence to recommendations (2');  
44  
45 b) Criteria for assessing impact of implementing the recommendations (2');  
46  
47 c) Advice on the frequency and interval of measurement (1');  
48  
49 d) Descriptions or operational definitions of how the criteria should be measured (1')

50 Related *Report Criteria* from *User's Manual*: • identification of criteria to assess guideline implementation  
51 or adherence to recommendations • criteria for assessing impact of implementing the recommendations •  
52 advice on the frequency and interval of measurement • descriptions or operational definitions of how the  
53 criteria should be measured  
54  
55

56 **Domain 6 Editorial Independence**

57 **Item 22 Funding Body: The views of the funding body have not influenced the content of the**  
58 **guideline.**

59 Instructions:

60 Information on two aspects should be provided (add 3' for each aspect, 6' in total):

- 1  
2 a) The name of the funding body or source of funding (or explicit statement of no funding, 3');  
3 b) A statement that the funding body did not influence the content of the guideline (3')  
4

5  
6 Related *Report Criteria* from *User's Manual*: • the name of the funding body or source of funding (or  
7 explicit statement of no funding) • a statement that the funding body did not influence the content of the  
8 guideline  
9

10  
11 **Item 23 Competing Interests: Competing interests of guideline development group members have**  
12 **been recorded and addressed.**

13 Instructions:

14 Information on four aspects should be provided (add corresponding scores for each aspect, 6' in total):

- 15 a) Description of the types of competing interests considered (2');  
16 b) Methods by which potential competing interests were sought (1');  
17 c) Description of the competing interests (1');  
18 d) Description of how the competing interests influenced the guideline process and development of  
19 recommendations (2')  
20  
21  
22

23  
24 Related *Report Criteria* from *User's Manual*: • description of the types of competing interests considered •  
25 methods by which potential competing interests were sought • description of the competing interests •  
26 description of how the competing interests influenced the guideline process and development of  
27 recommendations  
28  
29  
30

31  
32 **Overall Guideline Assessment**

33 **Question 1 Overall quality: Rate the overall quality of this guideline.**

34 Instructions:

35 7' in total. Reviewer's impression on the overall quality of the guideline.  
36  
37

38 **Question 2 Strength of recommendation: I would recommend this guideline for use.**

39 Instructions:

40 Three options to choose from: a) Yes; b) Yes, with modifications; c) No  
41 Reviewer's impression on whether the guideline is easy to be applied to clinical practice.  
42  
43

44  
45 Related *Report Criteria* from *User's Manual*: The overall assessment requires the AGREE II user to make  
46 a judgment as to the quality of the guideline, taking into account the appraisal items considered in the  
47 assessment process.  
48  
49  
50  
51  
52  
53  
54  
55  
56  
57  
58  
59  
60

## References

14. Khanna D, Fitzgerald JD, Khanna PP, Bae S, Singh MK, Neogi T, Pillinger MH, Merrill J, Lee S, Prakash S *et al*: **2012 American College of Rheumatology guidelines for management of gout. Part 1: systematic nonpharmacologic and pharmacologic therapeutic approaches to hyperuricemia.** *Arthritis care & research* 2012, **64**(10):1431-1446.
15. Khanna D, Khanna PP, Fitzgerald JD, Singh MK, Bae S, Neogi T, Pillinger MH, Merrill J, Lee S, Prakash S *et al*: **2012 American college of rheumatology guidelines for management of gout. part 2: Therapy and antiinflammatory prophylaxis of acute gouty arthritis.** *Arthritis Care and Research* 2012, **64**(10):1447-1461.
16. Richette P, Doherty M, Pascual E, Barskova V, Becce F, Castaneda-Sanabria J, Coyfish M, Guillo S, Jansen TL, Janssens H *et al*: **2016 updated EULAR evidence-based recommendations for the management of gout.** *Annals of the rheumatic diseases* 2016.
17. Hamburger M, Baraf HS, Adamson TC, 3rd, Basile J, Bass L, Cole B, Doghramji PP, Guadagnoli GA, Hamburger F, Harford R *et al*: **2011 Recommendations for the diagnosis and management of gout and hyperuricemia.** *Postgraduate medicine* 2011, **123**(6 Suppl 1):3-36.
18. Zhang W, Doherty M, Pascual E, Bardin T, Barskova V, Conaghan P, Gerster J, Jacobs J, Leeb B, Liote F *et al*: **EULAR evidence based recommendations for gout. Part I: Diagnosis. Report of a task force of the Standing Committee for International Clinical Studies Including Therapeutics (ESCSIT).** *Annals of the rheumatic diseases* 2006, **65**(10):1301-1311.
19. Qaseem A, McLean RM, Starkey M, Forciea MA: **Diagnosis of acute gout: a clinical practice guideline from the American College of Physicians.** *Annals of internal medicine* 2017, **166**(1):52-57.
20. Qaseem A, Harris RP, Forciea MA: **Management of acute and recurrent gout: a clinical practice guideline from the American College of Physicians.** *Annals of internal medicine* 2017, **166**(1):58-68.
21. Hui M, Carr A, Cameron S, Davenport G, Doherty M, Forrester H, Jenkins W, Jordan KM, Mallen CD, McDonald TM: **The British Society for Rheumatology guideline for the management of gout.** *Rheumatology* 2017, **56**(7):1056-1059.
22. Multi-disciplinary Expert Task Force on Hyperuricemia and Its Related Diseases. **Chinese multi-disciplinary consensus on the diagnosis and treatment of hyperuricemia and its related diseases.** *Chin J Intern Med.* 2017; **56**(3): 235-248 (Original document in Chinese).
28. Brouwers MC, Kho ME, Browman GP, Burgers JS, Cluzeau F, Feder G, Fervers B, Graham ID, Grimshaw J, Hanna SE: **AGREE II: advancing guideline development, reporting and evaluation in health care.** *Canadian Medical Association Journal* 2010, **182**(18):E839-E842.
36. Sivera F, Andres M, Carmona L, Kydd ASR, Moi J, Seth R, Sriranganathan M, Van Durme C, Van Echteld I, Vinik O *et al*: **Multinational evidence-based recommendations for the diagnosis and management of gout: Integrating systematic literature review and expert opinion of a broad panel of rheumatologists in the 3e initiative.** *Annals of the rheumatic diseases* 2014, **73**(2):328-335.
37. Chinese Society of Endocrinology. **Chinese consensus on the management of hyperuricemia and gout.** *Chin J Endocrinol Metab.* 2013; **29**(11): 913-920 (Original document in Chinese).
38. Association TR: **Taiwan guideline for the management of gout and hyperuricemia - updated 2016.** *Formosan Journal of Rheumatology* 2016, **30**:1-32.
39. Kiltz U, Smolen J, Bardin T, Cohen Solal A, Dalbeth N, Doherty M, Engel B, Flader C, Kay J, Matsuoka M *et al*: **Treat-to-target (T2T) recommendations for gout.** *Annals of the rheumatic diseases* 2016.
40. Araujo F, Cordeiro I, Teixeira F, Rovisco J, Ramiro S, Mourao AF, Costa JA, Pimentao JB, Malcata A, Santos MJ *et al*: **Portuguese recommendations for the diagnosis and management of gout.** *Acta reumatologica portuguesa* 2014, **39**(2):158-171.
41. Chinese Rheumatology Association. **2016 Chinese guideline on the diagnosis and management of**

- 1  
2 **gout**. *Chin J Intern Med*. 2016; **55**(11): 892-899 (Original document in Chinese).
- 3  
4 42. Neogi T, Jansen TLTA, Dalbeth N, Franssen J, Schumacher HR, Berendsen D, Brown M, Choi H,  
5 Edwards NL, Janssens HJEM *et al*: **2015 Gout classification criteria: An American College of**  
6 **Rheumatology/European League Against Rheumatism collaborative initiative**. *Annals of the*  
7 *rheumatic diseases* 2015, **74**(10):1789-1798.
- 8  
9 43. Graf SW, Whittle SL, Wechalekar MD, Moi JHY, Barrett C, Hill CL, Littlejohn G, Lynch N, Major G,  
10 Taylor AL *et al*: **Australian and New Zealand recommendations for the diagnosis and**  
11 **management of gout: Integrating systematic literature review and expert opinion in the 3e**  
12 **Initiative**. *International journal of rheumatic diseases* 2015, **18**(3):341-351.
- 13  
14 44. Federal Ministry of Health (Nigeria). **National nutritional guideline on non-communicable disease**  
15 **prevention, control and management**. Accessed at  
16 <http://www.health.gov.ng/doc/NutritionalGuideline.pdf> on 28 July 2017.
- 17  
18 45. Manara M, Bortoluzzi A, Favero M, Prevete I, Scire CA, Bianchi G, Borghi C, Cimmino MA, D'Avola  
19 GM, Desideri G *et al*: **Italian Society of Rheumatology recommendations for the management of**  
20 **gout**. *Reumatismo* 2013, **65**(1):4-21.
- 21  
22 46. Spanish Society of Rheumatology (SER). **Clinical practice guidelines for management of gout**.  
23 Accessed at [https://www.ser.es/wp-content/uploads/2015/09/GuipClinGot\\_1140226\\_EN.pdf](https://www.ser.es/wp-content/uploads/2015/09/GuipClinGot_1140226_EN.pdf) on 28 July  
24 2017.
- 25  
26 47. Hu D, Ding R: **The diagnosis and treatment advice of cardiovascular disease combined**  
27 **asymptomatic hyperuricemia (second edition)**. *Chinese Journal of Cardiovascular Research* 2012,  
28 **10**(4):241-249.
- 29  
30 48. Yamanaka H: **Japanese guideline for the management of hyperuricemia and gout: second edition**.  
31 *Nucleosides, nucleotides & nucleic acids* 2011, **30**(12):1018-1029.
- 32  
33 49. **Ministry of Health Malaysia (MOH). Management of gout**. Accessed at  
34 <http://www.moh.gov.my/penerbitan/CPG2017/3893.pdf> on 28 July 2017.
- 35  
36 50. Li-Yu J, Salido E, Manahan S, Lichauco J, Lorenzo J, Torralba K, Raso A, Roberto L, Santos EP,  
37 Maceda L: **Philippine clinical practice guidelines for the management of gout**. *International journal*  
38 *of rheumatic diseases* 2008, **11**:A362.
- 39  
40 51. Meyers OL, Cassim B, Mody GM: **Hyperuricaemia and gout: clinical guideline 2003**. *South African*  
41 *medical journal = Suid-Afrikaanse tydskrif vir geneeskunde* 2003, **93**(12 Pt 2):961-971.
- 42  
43 52. The University of Texas at Austin, School of Nursing, Family Nurse Practitioner Program.  
44 **Management of initial gout in adults**. Accessed at  
45 <http://www.alabmed.com/uploadfile/2014/0515/20140515070230703.pdf> on 25 July 2017.
- 46  
47 68. Wuthrich H, Alromaih F, So A: **Guidelines for the treatment of gout: a Swiss perspective**. *Swiss*  
48 *medical weekly* 2016, **146**:w14341.
- 49  
50 69. Ceriotti F, Fernandez-Calle P, Klee GG, Nordin G, Sandberg S, Streichert T, Vives-Corrans JL,  
51 Panteghini M: **Criteria for assigning laboratory measurands to models for analytical performance**  
52 **specifications defined in the 1st EFLM Strategic Conference**. *Clinical chemistry and laboratory*  
53 *medicine* 2016.
- 54  
55 70. Liote F: **New therapeutic approach to hyperuricemia and gout in the light of recommendations**.  
56 *Joint, bone, spine : revue du rhumatisme* 2016, **83**(4):376-380.
- 57  
58 71. de Lautour H, Taylor WJ, Adebajo A, Alten R, Burgos-Vargas R, Chapman P, Cimmino MA, da Rocha  
59 Castelar Pinheiro G, Day R, Harrold LR *et al*: **Development of Preliminary Remission Criteria for**  
60 **Gout Using Delphi and 1000Minds Consensus Exercises**. *Arthritis care & research* 2016,  
**68**(5):667-672.
72. De Lautour H, Dalbeth N, Taylor W: **Development of preliminary remission criteria for gout using**  
**Delphi and 1000 minds consensus exercises**. *Arthritis and Rheumatology* 2014, **66**:S68.



- 1  
2  
3  
4  
5  
6  
7  
8  
9  
10  
11  
12  
13  
14  
15  
16  
17  
18  
19  
20  
21  
22  
23  
24  
25  
26  
27  
28  
29  
30  
31  
32  
33  
34  
35  
36  
37  
38  
39  
40  
41  
42  
43  
44  
45  
46  
47  
48  
49  
50  
51  
52  
53  
54  
55  
56  
57  
58  
59  
60
73. Dalbeth N, Winnard D, Gow PJ, Boswell DR, Te Karu L, Lindsay K, Arroll B, Stamp LK: **Urate testing in gout: why, when and how.** *The New Zealand medical journal* 2015, **128**(1420):65-68.
74. Terslev L, Gutierrez M, Schmidt WA, Keen HI, Filippucci E, Kane D, Thiele R, Kaeley G, Balint P, Mandl P *et al*: **Ultrasound as an Outcome Measure in Gout. A Validation Process by the OMERACT Ultrasound Working Group.** *The Journal of rheumatology* 2015, **42**(11):2177-2181.
75. Turk C, Petrik A, Sarica K, Seitz C, Skolarikos A, Straub M, Knoll T: **EAU Guidelines on Diagnosis and Conservative Management of Urolithiasis.** *European urology* 2016, **69**(3):468-474.
76. Stewart Coats AJ, Shewan LG: **Consensus Meeting on "Uric Acid and Cardiovascular Risk" held at University Magna Graecia, Catanzaro, Italy, May 2014. Publication of the Proceedings as a special issue in the International Journal of Cardiology.** *International journal of cardiology* 2016, **213**:1-3.
77. Sullivan PM, William A, Tichy EM: **Hyperuricemia and gout in solid-organ transplant: update in pharmacological management.** *Progress in transplantation (Aliso Viejo, Calif)* 2015, **25**(3):263-270.
78. Gutierrez M, Schmidt WA, Thiele RG, Keen HI, Kaeley GS, Naredo E, Iagnocco A, Bruyn GA, Balint PV, Filippucci E *et al*: **International Consensus for ultrasound lesions in gout: results of Delphi process and web-reliability exercise.** *Rheumatology (Oxford, England)* 2015, **54**(10):1797-1805.
79. Grainger R, Dalbeth N, Keen H, Durcan L, Lawrence Edwards N, Perez-Ruiz F, Diaz-Torne C, Singh JA, Khanna D, Simon LS *et al*: **Imaging as an Outcome Measure in Gout Studies: Report from the OMERACT Gout Working Group.** *The Journal of rheumatology* 2015, **42**(12):2460-2464.
80. Robinson PC, Dalbeth N: **Advances in pharmacotherapy for the treatment of gout.** *Expert opinion on pharmacotherapy* 2015, **16**(4):533-546.
81. Chaudhary K, Malhotra K, Sowers J, Aroor A: **Uric Acid - key ingredient in the recipe for cardiorenal metabolic syndrome.** *Cardiorenal medicine* 2013, **3**(3):208-220.
82. Bakris GL, Doghramji PP, Keenan RT, Silber SH: **CaseBook challenges: Managing gout, hyperuricemia and comorbidities -- dialogue with the experts.** *The American journal of medicine* 2014, **127**(1):S1.
83. Terkeltaub R: **Gout: multinational gout guidelines: how do we move beyond 'deja vu'?** *Nature reviews Rheumatology* 2013, **9**(10):567-569.
84. Lyseng-Williamson KA: **Canakinumab: a guide to its use in acute gouty arthritis flares.** *BioDrugs : clinical immunotherapeutics, biopharmaceuticals and gene therapy* 2013, **27**(4):401-406.
85. Deodhar A: **Update in rheumatology: evidence published in 2012.** *Annals of internal medicine* 2013, **158**(12):903-906.
86. Simao AN, Lozovoy MA, Dichi I: **The uric acid metabolism pathway as a therapeutic target in hyperuricemia related to metabolic syndrome.** *Expert opinion on therapeutic targets* 2012, **16**(12):1175-1187.
87. Stamp LK, Jordan S: **The challenges of gout management in the elderly.** *Drugs & aging* 2011, **28**(8):591-603.
88. Jansen TL, Richette P, Perez-Ruiz F, Tausche AK, Guerne PA, Punzi L, Leeb B, Barskova V, Uhlig T, Pimentao J *et al*: **International position paper on febuxostat.** *Clinical rheumatology* 2010, **29**(8):835-840.
89. Grainger R, Taylor WJ, Dalbeth N, Perez-Ruiz F, Singh JA, Waltrip RW, Schlesinger N, Evans R, Edwards NL, Sivera F *et al*: **Progress in measurement instruments for acute and chronic gout studies.** *The Journal of rheumatology* 2009, **36**(10):2346-2355.
90. Grainger R, Taylor WJ: **Establishing outcome domains for evaluating treatment of acute and chronic gout.** *Current opinion in rheumatology* 2008, **20**(2):173-178.
91. Dalbeth N, Stamp L: **Allopurinol dosing in renal impairment: walking the tightrope between adequate urate lowering and adverse events.** *Seminars in dialysis* 2007, **20**(5):391-395.

- 1  
2  
3  
4  
5  
6  
7  
8  
9  
10  
11  
12  
13  
14  
15  
16  
17  
18  
19  
20  
21  
22  
23  
24  
25  
26  
27  
28  
29  
30  
31  
32  
33  
34  
35  
36  
37  
38  
39  
40  
41  
42  
43  
44  
45  
46  
47  
48  
49  
50  
51  
52  
53  
54  
55  
56  
57  
58  
59  
60
92. Jordan KM, Cameron JS, Snaith M, Zhang W, Doherty M, Seckl J, Hingorani A, Jaques R, Nuki G: **British Society for Rheumatology and British Health Professionals in Rheumatology guideline for the management of gout.** *Rheumatology (Oxford, England)* 2007, **46**(8):1372-1374.
93. Becker G: **The CARI guidelines. Kidney stones: uric acid stones.** *Nephrology (Carlton, Vic)* 2007, **12 Suppl 1**:S21-25.
94. Caramia G, Di Gregorio L, Tarantino ML, Galuffo A, Iacolino R, Caramia M: **Uric acid, phosphate and oxalate stones: treatment and prophylaxis.** *Urologia internationalis* 2004, **72 Suppl 1**:24-28.
95. Terkeltaub RA: **Clinical practice. Gout.** *The New England journal of medicine* 2003, **349**(17):1647-1655.
96. Cleland LG, Hill CL, James MJ: **Diet and arthritis.** *Bailliere's clinical rheumatology* 1995, **9**(4):771-785.
97. Hande KR, Noone RM, Stone WJ: **Severe allopurinol toxicity. Description and guidelines for prevention in patients with renal insufficiency.** *The American journal of medicine* 1984, **76**(1):47-56.
98. **Committee on the Review of Medicines. Recommendations on phenylbutazone, oxyphenbutazone, feprazone, allopurinol, colchicine, probenecid, and sulphinpyrazone.** *British medical journal* 1978, **1**(6125):1466-1467.
99. Mourgues C, Soubrier M, Pereira B, Vorilhon P, Mathieu S: **2012 American guidelines for the management of gout as seen by family doctors in France.** *Annals of the rheumatic diseases* 2016, **75**:1187.
100. Bakris GL, Doghramji PP, Keenan RT, Silber SH: **CaseBook Challenges: Managing Gout, Hyperuricemia and Comorbidities-Dialogue with the Experts.** *American Journal of Medicine* 1970, **127**(1):S1.
101. Pai S, Raslan A, Schlesinger N: **Gout: Update on Current Therapeutics.** *Current Treatment Options in Rheumatology* 2015, **1**(2):131-142.
102. Vargas-Santos AB, Taylor WJ, Neogi T: **Gout Classification Criteria: Update and Implications.** *Current rheumatology reports* 2016, **18 (7) (no pagination)**(46).
103. Filiopoulos V, Hadjiyannakos D, Vlassopoulos D: **Febuxostat renoprotection in CKD patients with asymptomatic hyperuricemia.** *American Journal of Kidney Diseases* 2016, **67**(6):989-990.
104. Chinchilla SP, Urionaguena I, Perez-Ruiz F: **Febuxostat for the chronic management of hyperuricemia in patients with gout.** *Expert Review of Clinical Pharmacology* 2016, **9**(5):665-673.
105. Rimler E, Lom J, Higdon J, Cosco D, Jones D: **A primary care perspective on gout.** *Open Urology and Nephrology Journal* 2016, **9**(Suppl 1: M5):27-34.
106. Saito Y, Stamp LK, Caudle KE, Hershfield MS, McDonagh EM, Callaghan JT, Tassaneeyakul W, Mushiroda T, Kamatani N, Goldspiel BR *et al*: **CPIC: Clinical Pharmacogenetics Implementation Consortium of the Pharmacogenomics Research Network.** *Clinical pharmacology and therapeutics* 2016, **99**(1):36-37.
107. Mody GM: **Update on hyperuricaemia and gout with evidence based management guidelines.** *South African Family Practice* 2015, **57**(4):267-272.
108. Richette P, Pascual E, Doherty M, Barskova V, Becce F, Coyfish M, Janssens H, Jansen T, Liote F, Mallen C *et al*: **Updated EULAR evidence-based recommendations for the diagnosis of gout.** *Annals of the Rheumatic Diseases Conference: Annual European Congress of Rheumatology of the European League Against Rheumatism, EULAR* 2014, **73**(no pagination).
109. Richette P, Doherty M, Pascual E, Barskova V, Becce F, Coyfish M, Janssens H, Jansen T, Liote F, Mallen C *et al*: **Updated EULAR evidence-based recommendations for the management of gout.** *Annals of the Rheumatic Diseases Conference: Annual European Congress of Rheumatology of the European League Against Rheumatism, EULAR* 2014, **73**(no pagination).
110. Gutierrez M, Smith W, Thiele R, Keen H, Kaeley G, Naredo E, Iagnocco A, Bruyn G, Balint P,

- 1  
2  
3  
4  
5  
6  
7  
8  
9  
10  
11  
12  
13  
14  
15  
16  
17  
18  
19  
20  
21  
22  
23  
24  
25  
26  
27  
28  
29  
30  
31  
32  
33  
34  
35  
36  
37  
38  
39  
40  
41  
42  
43  
44  
45  
46  
47  
48  
49  
50  
51  
52  
53  
54  
55  
56  
57  
58  
59  
60
- Filippucci E *et al*: **Defining elementary ultrasound lesions in gout. Preliminary results of delphi consensus and web-exercise reliability.** *Annals of the Rheumatic Diseases Conference: Annual European Congress of Rheumatology of the European League Against Rheumatism, EULAR 2014*, **73**(no pagination).
111. Furst DE, Keystone EC, So AK, Braun J, Breedveld FC, Burmester GR, De Benedetti F, Dorner T, Emery P, Fleischmann R *et al*: **Updated consensus statement on biological agents for the treatment of rheumatic diseases, 2012.** *Annals of the rheumatic diseases* 2013, **72**(SUPPL. 2):ii2-ii34.
112. Hershfield MS, Callaghan JT, Tassaneeyakul W, Mushiroda T, Thorn CF, Klein TE, Lee MTM: **Clinical pharmacogenetics implementation consortium guidelines for human leukocyte antigen-b genotype and allopurinol dosing.** *Clinical pharmacology and therapeutics* 2013, **93**(2):153-158.
113. Andres M, Sivera F, Kydd A, Moi J, Seth R, Sriranganathan MK, Van Durme C, Van Echteld IAAM, Vinik O, Wechalekar MD *et al*: **Multinational evidence-based recommendations for diagnosis and management of gout: Integrating systematic literature research and expert opinion of a broad panel of rheumatologists in the 3E initiative.** *Arthritis and rheumatism* 2012, **64**:S810.
114. Stevenson M, Pandor A: **Febuxostat for the management of hyperuricaemia in patients with gout: A nice single technology appraisal.** *PharmacoEconomics* 2011, **29**(2):133-140.
115. Diaz-Borjon A: **Guidelines for the use of conventional and newer disease-modifying antirheumatic drugs in elderly patients with rheumatoid arthritis.** *Drugs and Aging* 2009, **26**(4):273-293.
116. Furst DE, Keystone EC, Fleischmann R, Mease P, Breedveld FC, Smolen JS, Kalden JR, Braun J, Bresnihan B, Burmester GR *et al*: **Updated consensus statement on biological agents for the treatment of rheumatic diseases, 2009.** *Annals of the rheumatic diseases* 2010, **69**(SUPPL. 1):i2-i29.
117. Taylor WJ, Shewchuk R, Saag KG, Schumacher Jr HR, Singh JA, Grainger R, Edwards NL, Bardin T, Waltrip RW, Simon LS *et al*: **Toward a Valid Definition of Gout Flare: Results of Consensus Exercises Using Delphi Methodology and Cognitive Mapping.** *Arthritis Care and Research* 2009, **61**(4):535-543.
118. Taylor WJ, Schumacher Jr HR, Baraf HSB, Chapman P, Stamp L, Doherty M, McQueen F, Dalbeth N, Schlesinger N, Furst DE *et al*: **A modified Delphi exercise to determine the extent of consensus with OMERACT outcome domains for studies of acute and chronic gout.** *Annals of the rheumatic diseases* 2008, **67**(6):888-891.
119. Bussieres AE, Peterson C, Taylor JAM: **Diagnostic Imaging Guideline for Musculoskeletal Complaints in Adults-An Evidence-Based Approach-Part 2: Upper Extremity Disorders.** *Journal of Manipulative and Physiological Therapeutics* 2008, **31**(1):2-32.
120. Brooks P, Boers M, Simon LS, Strand V, Tugwell P: **Outcome measures in rheumatoid arthritis: The OMERACT process.** *Expert Review of Clinical Immunology* 2007, **3**(3):271-275.
121. Bestermann W, Houston MC, Basile J, Egan B, Ferrario CM, Lackland D, Hawkins RG, Reed J, Rogers P, Wise D *et al*: **Addressing the global cardiovascular risk of hypertension, dyslipidemia, diabetes mellitus, and the metabolic syndrome in the Southeastern United States, part II: Treatment recommendations for management of the global cardiovascular risk of hypertension, dyslipidemia, diabetes mellitus, and the metabolic syndrome.** *American Journal of the Medical Sciences* 2005, **329**(6):292-305.
122. Schumacher Jr HR: **Management strategies for osteoarthritis, ankylosing spondylitis, and gouty arthritis.** *Journal of Clinical Rheumatology* 2004, **10**(3 SUPPL.):S18-S25.
123. Bartlett JG: **Guidelines section.** *Infectious Diseases in Clinical Practice* 2002, **11**(8):467-471.
124. Furst DE, Keystone EC, So AK, Braun J, Breedveld FC, Burmester GR, De Benedetti F, Dörner T, Emery P, Fleischmann R: **Updated consensus statement on biological agents for the treatment of rheumatic diseases, 2012.** *Annals of the rheumatic diseases* 2013, **72**(suppl 2):ii2-ii34.
125. Newberry SJ, FitzGerald JD, Motala A, Booth M, Maglione MA, Han D, Tariq A, O'hanlon CE,

- 1 Shanman R, Dudley W: **Diagnosis of gout: a systematic review in support of an American College**  
2 **of Physicians clinical practice guideline.** *Annals of internal medicine* 2017, **166**(1):27-36.
- 3  
4 126. Shekelle PG, Newberry SJ, FitzGerald JD, Motala A, O'hanlon CE, Tariq A, Okunogbe A, Han D,  
5 Shanman R: **Management of gout: a systematic review in support of an American College of**  
6 **Physicians clinical practice guideline.** *Annals of internal medicine* 2017, **166**(1):37-51.
- 7  
8 127. Sandberg S, Fraser CG, Horvath AR, Jansen R, Jones G, Oosterhuis W, Petersen PH, Schimmel H,  
9 Sikaris K, Panteghini M: **Defining analytical performance specifications: consensus statement**  
10 **from the 1st Strategic Conference of the European Federation of Clinical Chemistry and**  
11 **Laboratory Medicine.** *Clinical Chemistry and Laboratory Medicine (CCLM)* 2015, **53**(6):833-835.
- 12  
13 128. Kallinich T, Haffner D, Niehues T, Huss K, Lainka E, Neudorf U, Schaefer C, Stojanov S, Timmann C,  
14 Keitzer R: **Colchicine use in children and adolescents with familial Mediterranean fever:**  
15 **literature review and consensus statement.** *Pediatrics* 2007, **119**(2):e474-e483.
- 16  
17 129. Preminger GM, Tiselius H-G, Assimos DG, Alken P, Buck C, Gallucci M, Knoll T, Lingeman JE,  
18 Nakada SY, Pearle MS: **2007 guideline for the management of ureteral calculi.** *The Journal of*  
19 *urology* 2007, **178**(6):2418-2434.
- 20  
21 130. National Institute for Health and Care Excellence (NICE). **Febuxostat for the management of**  
22 **hyperuricaemia in people with gout.** Assessed at nice.org.uk/guidance/ta164 on 25 July 2017.
- 23  
24 131. Phoon, R and Johnson, D. **Medical therapies to reduce chronic kidney disease progression and**  
25 **cardiovascular risk: uric acid-lowering agents.** Accessed at  
26 [http://www.cari.org.au/CKD/CKD%20early/Medical\\_Th\\_Uric\\_Acid-lowering.pdf](http://www.cari.org.au/CKD/CKD%20early/Medical_Th_Uric_Acid-lowering.pdf) on 23 July 2017.
- 27  
28 132. Li Q, Yu P: **The diagnosis and treatment of gout.** *Int J Endocrinol Metab* 2011, **31**(5):289-291.
- 29  
30 133. zhang X, Zhang Z: **Advice for the diagnosis and treatment for gout.** *Chin J Rheumatol* 2013,  
31 **17**(8):631.
- 32  
33 134. Deng X, Zhang Z: **OMERACT Ultrasound Gout Task Force group released the international**  
34 **consensus for ultrasound lesions in gout.** *Chin J Rheumatol* 2016, **20**(3):216.
- 35  
36 135. Chinese Rheumatology Association (CRA). **Guideline for the diagnosis and tretment for primary**  
37 **gout (draft).** *Chin J Rheumatol.* 2004:8(3): 178-181 (Original document in Chinese).
- 38  
39 136. Chinese College of Cardiovascular Physicians (CCCP). **The diagnosis and treatment advice of**  
40 **cardiovascular disease combined asymptomatic hyperuricemia (second edition).** Accessed at  
41 <http://www.alabmed.com/uploadfile/2014/0121/20140121022919976.pdf> on 20 July 2017 (Original  
42 document in Chinese).
- 43  
44 137. Chinese Rheumatology Association (CRA). **Guideline for the diagnosis and tretment for primary**  
45 **gout (draft).** *Chin J Rheumatol.* 2011:15(6): 410-413 (Original document in Chinese).
- 46  
47 138. World Health Organization (WHO). **Standard treatment guidelines and essential drugs list for**  
48 **South Africa.** Accessed at <http://apps.who.int/medicinedocs/documents/s18259en/s18259en.pdf> on 23  
49 July 2017.
- 50  
51 139. European Medicines Agency (EMA). **Concept paper on the need of the guideline on clinical**  
52 **investigation of medicinal products for the treatment of gout.** Accessed at  
53 [http://www.ema.europa.eu/docs/en\\_GB/document\\_library/Scientific\\_guideline/2012/06/WC500128670](http://www.ema.europa.eu/docs/en_GB/document_library/Scientific_guideline/2012/06/WC500128670.pdf)  
54 .pdf on 23 July 2017.
- 55  
56 140. Agency for Healthcare Research and Quality (AHRQ). **Diagnosis and Management of Gout:**  
57 **Current State of the Evidence.** Accessed at  
58 [https://effectivehealthcare.ahrq.gov/sites/default/files/pdf/gout\\_clinician.pdf](https://effectivehealthcare.ahrq.gov/sites/default/files/pdf/gout_clinician.pdf) on 25 July 2017.
- 59  
60 141. Agency for Healthcare Research and Quality (AHRQ). **Diagnosis of Gout.** Accessed at  
61 [https://effectivehealthcare.ahrq.gov/sites/default/files/pdf/gout\\_research-2016.pdf](https://effectivehealthcare.ahrq.gov/sites/default/files/pdf/gout_research-2016.pdf) on 25 July 2017.
142. National Institute for Health and Care Excellence (NICE). **Pegloticase for treating severe debilitating**  
**chronic tophaceous gout.** Assessed at nice.org.uk/guidance/ta291 on 25 July 2017.

- 1  
2  
3  
4  
5  
6  
7  
8  
9  
10  
11  
12  
13  
14  
15  
16  
17  
18  
19  
20  
21  
22  
23  
24  
25  
26  
27  
28  
29  
30  
31  
32  
33  
34  
35  
36  
37  
38  
39  
40  
41  
42  
43  
44  
45  
46  
47  
48  
49  
50  
51  
52  
53  
54  
55  
56  
57  
58  
59  
60
143. Agency for Healthcare Research and Quality (AHRQ). **Diagnosis of gout**. Assessed at [www.effectivehealthcare.ahrq.gov/reports/fnal.cfm](http://www.effectivehealthcare.ahrq.gov/reports/fnal.cfm) on 25 July 2017.
144. Buckinghamshire Formulary, National Health Service (NHS). **781FM.1 Febuxostat**. Accessed at [http://www.bucksformulary.nhs.uk/docs/Guideline\\_781FM.pdf](http://www.bucksformulary.nhs.uk/docs/Guideline_781FM.pdf) on 25 July 2017.
145. Canadian Expert Drug Advisory Committee (CEDAC). **Febuxostat**. Accessed at [https://www.cadth.ca/media/cdr/complete/cdr\\_complete\\_Uloric\\_April-29-11.pdf](https://www.cadth.ca/media/cdr/complete/cdr_complete_Uloric_April-29-11.pdf) on 25 July 2017.
146. Dalhousie CME Academic Detailing Service. **Gout: Update 2013**. Accessed at [https://cdn.dal.ca/content/dam/dalhousie/pdf/faculty/medicine/departments/core-units/cpd/academic-detailing/Gout\\_workbook.pdf](https://cdn.dal.ca/content/dam/dalhousie/pdf/faculty/medicine/departments/core-units/cpd/academic-detailing/Gout_workbook.pdf) on 23 July 2017.
147. Lancashire Medicines Management Group, National Health Service (NHS). **Gout Management Summary Guidelines (Version 1.1)**. Accessed at [http://www.lancsmmg.nhs.uk/download/guidelines/Gout%20Prescribing%20Guidance%20\(Versio%201.1\).pdf](http://www.lancsmmg.nhs.uk/download/guidelines/Gout%20Prescribing%20Guidance%20(Versio%201.1).pdf) on 25 July 2017.

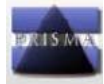

# PRISMA 2009 Checklist

| Section/topic                      | #  | Checklist item                                                                                                                                                                                                                                                                                              | Reported on page # |
|------------------------------------|----|-------------------------------------------------------------------------------------------------------------------------------------------------------------------------------------------------------------------------------------------------------------------------------------------------------------|--------------------|
| <b>TITLE</b>                       |    |                                                                                                                                                                                                                                                                                                             |                    |
| Title                              | 1  | Identify the report as a systematic review, meta-analysis, or both.                                                                                                                                                                                                                                         | 1                  |
| <b>ABSTRACT</b>                    |    |                                                                                                                                                                                                                                                                                                             |                    |
| Structured summary                 | 2  | Provide a structured summary including, as applicable: background; objectives; data sources; study eligibility criteria, participants, and interventions; study appraisal and synthesis methods; results; limitations; conclusions and implications of key findings; systematic review registration number. | 3-4                |
| <b>INTRODUCTION</b>                |    |                                                                                                                                                                                                                                                                                                             |                    |
| Rationale                          | 3  | Describe the rationale for the review in the context of what is already known.                                                                                                                                                                                                                              | 6-7                |
| Objectives                         | 4  | Provide an explicit statement of questions being addressed with reference to participants, interventions, comparisons, outcomes, and study design (PICOS).                                                                                                                                                  | 7                  |
| <b>METHODS</b>                     |    |                                                                                                                                                                                                                                                                                                             |                    |
| Protocol and registration          | 5  | Indicate if a review protocol exists, if and where it can be accessed (e.g., Web address), and, if available, provide registration information including registration number.                                                                                                                               | 7                  |
| Eligibility criteria               | 6  | Specify study characteristics (e.g., PICOS, length of follow-up) and report characteristics (e.g., years considered, language, publication status) used as criteria for eligibility, giving rationale.                                                                                                      | 8                  |
| Information sources                | 7  | Describe all information sources (e.g., databases with dates of coverage, contact with study authors to identify additional studies) in the search and date last searched.                                                                                                                                  | 7-8                |
| Search                             | 8  | Present full electronic search strategy for at least one database, including any limits used, such that it could be repeated.                                                                                                                                                                               | 7                  |
| Study selection                    | 9  | State the process for selecting studies (i.e., screening, eligibility, included in systematic review, and, if applicable, included in the meta-analysis).                                                                                                                                                   | 8                  |
| Data collection process            | 10 | Describe method of data extraction from reports (e.g., piloted forms, independently, in duplicate) and any processes for obtaining and confirming data from investigators.                                                                                                                                  | 8                  |
| Data items                         | 11 | List and define all variables for which data were sought (e.g., PICOS, funding sources) and any assumptions and simplifications made.                                                                                                                                                                       | 8                  |
| Risk of bias in individual studies | 12 | Describe methods used for assessing risk of bias of individual studies (including specification of whether this was done at the study or outcome level), and how this information is to be used in any data synthesis.                                                                                      | 8-9                |
| Summary measures                   | 13 | State the principal summary measures (e.g., risk ratio, difference in means).                                                                                                                                                                                                                               | 8-9                |
| Synthesis of results               | 14 | Describe the methods of handling data and combining results of studies, if done, including measures of consistency (e.g., $I^2$ ) for each meta-analysis.                                                                                                                                                   | 8-9                |

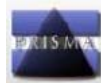

# PRISMA 2009 Checklist

Page 1 of 2

| Section/topic                 | #  | Checklist item                                                                                                                                                                                           | Reported -on page # |
|-------------------------------|----|----------------------------------------------------------------------------------------------------------------------------------------------------------------------------------------------------------|---------------------|
| Risk of bias across studies   | 15 | Specify any assessment of risk of bias that may affect the cumulative evidence (e.g., publication bias, selective reporting within studies).                                                             | 8-9                 |
| Additional analyses           | 16 | Describe methods of additional analyses (e.g., sensitivity or subgroup analyses, meta-regression), if done, indicating which were pre-specified.                                                         | 8-9                 |
| <b>RESULTS</b>                |    |                                                                                                                                                                                                          |                     |
| Study selection               | 17 | Give numbers of studies screened, assessed for eligibility, and included in the review, with reasons for exclusions at each stage, ideally with a flow diagram.                                          | 10                  |
| Study characteristics         | 18 | For each study, present characteristics for which data were extracted (e.g., study size, PICOS, follow-up period) and provide the citations.                                                             | 10-11               |
| Risk of bias within studies   | 19 | Present data on risk of bias of each study and, if available, any outcome level assessment (see item 12).                                                                                                | 11-12               |
| Results of individual studies | 20 | For all outcomes considered (benefits or harms), present, for each study: (a) simple summary data for each intervention group (b) effect estimates and confidence intervals, ideally with a forest plot. | 12-16               |
| Synthesis of results          | 21 | Present results of each meta-analysis done, including confidence intervals and measures of consistency.                                                                                                  | 12-16               |
| Risk of bias across studies   | 22 | Present results of any assessment of risk of bias across studies (see Item 15).                                                                                                                          | 11-12               |
| Additional analysis           | 23 | Give results of additional analyses, if done (e.g., sensitivity or subgroup analyses, meta-regression [see Item 16]).                                                                                    | 12                  |
| <b>DISCUSSION</b>             |    |                                                                                                                                                                                                          |                     |
| Summary of evidence           | 24 | Summarize the main findings including the strength of evidence for each main outcome; consider their relevance to key groups (e.g., healthcare providers, users, and policy makers).                     | 16-17               |
| Limitations                   | 25 | Discuss limitations at study and outcome level (e.g., risk of bias), and at review-level (e.g., incomplete retrieval of identified research, reporting bias).                                            | 21                  |
| Conclusions                   | 26 | Provide a general interpretation of the results in the context of other evidence, and implications for future research.                                                                                  | 22                  |
| <b>FUNDING</b>                |    |                                                                                                                                                                                                          |                     |
| Funding                       | 27 | Describe sources of funding for the systematic review and other support (e.g., supply of data); role of funders for the systematic review.                                                               | 22-23               |

From: Moher D, Liberati A, Tetzlaff J, Altman DG, The PRISMA Group (2009). Preferred Reporting Items for Systematic Reviews and Meta-Analyses: The PRISMA Statement. PLoS Med 6(7): e1000097. doi:10.1371/journal.pmed1000097

For more information, visit: [www.prisma-statement.org](http://www.prisma-statement.org).
