# Supplementary material for: Diagnosis and treatment for hyperuricemia and gout: a systematic review of clinical practice guidelines and consensus statements
Source: PubMed Central journal article supplement — BMJ Open. 2019 Aug 24;9(8):e026677. doi: 10.1136/bmjopen-2018-026677 (PMC6720466; doi:10.1136/bmjopen-2018-026677), 2019-08-24
Supplement: bmjopen-2018-026677supp001.pdf [file bmjopen-2018-026677supp001.pdf]

**Supplementary Materials**

## Contents

Supplementary Table 1. Search strategy in PubMed

Supplementary Table 2. Search strategy in EMBASE using the OVID interface

Supplementary Table 3. Searches in guideline databases

Supplementary Table 4. Excluded studies and reasons for exclusion

Supplementary Table 5. Domain score for each included guidance document

Supplementary Table 6. Mean scores across reviewers for the individual AGREE II domain items

Supplementary Table 7. Scores for each individual AGREE II domain items by each reviewer

Supplementary Table 8. Summary of recommendations for the diagnosis of gout and hyperuricemia by included guidance documents

Supplementary Table 9. Summary of recommendations for the treatment of hyperuricemia by included guidance documents

Supplementary Table 10. Summary of recommendations for the treatment of acute gout by included guidance documents

Supplementary Table 11. Summary of recommendations for the treatment of tophi by included guidance documents

Supplementary Figure 1. Standardized domain scores by the year of publication

Supplementary File 1. Instructions for Guideline Appraisal Using the AGREE II Instrument

**Supplementary Table 1. Search strategy in PubMed**

|   |                                                                                           |
|---|-------------------------------------------------------------------------------------------|
| 1 | urate* OR uric acid OR gout OR hyperuricemia OR hyperuricaemia                            |
| 2 | guideline OR guideline* OR consensus OR policy OR polic* OR statement* OR recommendation* |
| 3 | 1 AND 2                                                                                   |

**Supplementary Table 2. Search strategy in EMBASE using the OVID interface**

|    |                                        |
|----|----------------------------------------|
| 1  | exp hyperuricemia/                     |
| 2  | exp gout/                              |
| 3  | exp uric acid/                         |
| 4  | exp urate/                             |
| 5  | gout.m_titl.                           |
| 6  | uric acid.m_titl.                      |
| 7  | urate\$.m_titl.                        |
| 8  | hyperuric?emia.m_titl.                 |
| 9  | 1 or 2 or 3 or 4 or 5 or 6 or 7 or 8   |
| 10 | exp practice guideline/                |
| 11 | guideline\$.m_titl.                    |
| 12 | consensus.m_titl.                      |
| 13 | position statement\$.m_titl.           |
| 14 | exp health care policy/ or exp policy/ |
| 15 | recommendation\$.m_titl.               |
| 16 | 10 or 11 or 12 or 13 or 14 or 15       |
| 17 | 9 and 16                               |

**Supplementary Table 3. Searches in guideline databases**

| Databases                                         | Date of search | Search strategy                                                                                                        | Results found | Full text screened | Included documents | URL                                                                                        |
|---------------------------------------------------|----------------|------------------------------------------------------------------------------------------------------------------------|---------------|--------------------|--------------------|--------------------------------------------------------------------------------------------|
| National Guideline Clearinghouse                  | 2017/07/24     | hyperuricaemia OR hyperuricemia OR gout                                                                                | 27            | 6                  | 4                  | <a href="http://www.guideline.gov">www.guideline.gov</a>                                   |
| Guidelines International Network                  | 2017/07/24     | hyperuricaemia OR hyperuricemia OR gout, Search mode: Guidelines                                                       | 11            | 5                  | 5                  | <a href="http://www.g-i-n.net">www.g-i-n.net</a>                                           |
| National Institute for Health and Care Excellence | 2017/07/24     | hyperuricaemia OR hyperuricemia OR gout                                                                                | 25            | 2                  | 0                  | <a href="http://www.nice.org.uk">www.nice.org.uk</a>                                       |
| National Health Service                           | 2017/07/24     | hyperuricaemia OR hyperuricemia OR gout, filter type: guidance and policy                                              | 498           | 5                  | 3                  | <a href="http://www.evidence.nhs.uk">www.evidence.nhs.uk</a>                               |
| Scottish Intercollegiate Guidelines Network       | 2017/07/24     | NA                                                                                                                     | 53            | 0                  | 0                  | <a href="http://www.sign.ac.uk/our-guidelines.html">www.sign.ac.uk/our-guidelines.html</a> |
| Guidelines and Audit Implementation Network       | 2017/07/24     | “hyperuricaemia” OR “hyperuricemia” OR “gout”                                                                          | 0             | 0                  | 0                  | <a href="http://rqia.org.uk/search-result">rqia.org.uk/search-result</a>                   |
| Turning Research Into Practice Database           | 2017/07/24     | hyperuricaemia OR hyperuricemia OR gout, filter: all secondary evidence                                                | 155           | 9                  | 3                  | <a href="http://www.tripdatabase.com">www.tripdatabase.com</a>                             |
| Epistemonikos database                            | 2017/07/24     | hyperuricaemia OR hyperuricemia OR gout, filter: Broad syntheses OR Structured summaries                               | 38            | 2                  | 1                  | <a href="http://www.epistemonikos.org">www.epistemonikos.org</a>                           |
| Chinese Biomedical Literature Database            | 2017/07/22     | [Original search term in Chinese] (hyperuricaemia OR gout) AND (guideline OR consensus OR statement OR recommendation) | 423           | 7                  | 5                  | <a href="http://202.115.54.56/index.jsp">202.115.54.56/index.jsp</a>                       |
| Wanfang Data                                      | 2017/07/22     | [Original search term in Chinese] (hyperuricaemia OR gout) AND (guideline OR consensus OR statement OR recommendation) | 1331          | 19                 | 4                  | <a href="http://www.wanfangdata.com.cn/">www.wanfangdata.com.cn/</a>                       |

Abbreviations: NA: Not applicable.

**Supplementary Table 4. Excluded studies and reasons for exclusion**

| <b>First author</b>    | <b>Year</b> | <b>Reason for exclusion</b>                                                              |
|------------------------|-------------|------------------------------------------------------------------------------------------|
| Wuthrich [68]          | 2016        | Review                                                                                   |
| Cerioti [69]           | 2016        | Primary study                                                                            |
| Liote [70]             | 2016        | Editorial                                                                                |
| de Lautour [71]        | 2016        | Primary study                                                                            |
| de Lautour [72]        | 2014        | Conference abstract                                                                      |
| Dalbeth [73]           | 2015        | Review                                                                                   |
| Terslev [74]           | 2015        | Primary study                                                                            |
| Turk [75]              | 2016        | Not providing specific recommendations for hyperuricemia or gout                         |
| Stewart Coats [76]     | 2016        | Editorial                                                                                |
| Sullivan [77]          | 2015        | Review                                                                                   |
| Gutierrez [78]         | 2015        | Primary study                                                                            |
| Grainger [79]          | 2015        | Primary study                                                                            |
| Robinson [80]          | 2015        | Review                                                                                   |
| Chaudhary [81]         | 2013        | Review                                                                                   |
| Bakris [82]            | 2014        | Multimedia section                                                                       |
| Terkeltaub [83]        | 2013        | Review                                                                                   |
| Lyseng-Williamson [84] | 2013        | Review                                                                                   |
| Deodhar [85]           | 2013        | Review                                                                                   |
| Simao [86]             | 2012        | Review                                                                                   |
| Stamp [87]             | 2011        | Review                                                                                   |
| Jansen [88]            | 2010        | Not produced by related professional associations, institutes, societies, or communities |
| Grainger [89]          | 2009        | Review                                                                                   |
| Grainger [90]          | 2008        | Review                                                                                   |
| Dalbeth [91]           | 2007        | Review                                                                                   |
| Jordan [92]            | 2007        | Replaced by updated versions from the same organization                                  |
| Becker [93]            | 2007        | Not providing specific recommendations for hyperuricemia or gout                         |

|                                           |      |                                                                  |
|-------------------------------------------|------|------------------------------------------------------------------|
| Zhang [55]                                | 2006 | Replaced by updated versions from the same organization          |
| Caramia [94]                              | 2004 | Review                                                           |
| Terkeltaub [95]                           | 2003 | Case report                                                      |
| Cleland [96]                              | 1995 | Review                                                           |
| Hande [97]                                | 1984 | Case series                                                      |
| Committee on the Review of Medicines [98] | 1978 | Not providing specific recommendations for hyperuricemia or gout |
| Mourgues [99]                             | 2016 | Conference abstract                                              |
| Bakris [100]                              | 1970 | Not providing specific recommendations for hyperuricemia or gout |
| Pai [101]                                 | 2015 | Review                                                           |
| Vargas-Santos [102]                       | 2016 | Review                                                           |
| Filiopoulos [103]                         | 2016 | Comment letter                                                   |
| Chinchilla [104]                          | 2016 | Review                                                           |
| Rimler [105]                              | 2016 | Review                                                           |
| Saito [106]                               | 2016 | Not providing specific recommendations for hyperuricemia or gout |
| Mody [107]                                | 2015 | Review                                                           |
| Richette [108]                            | 2014 | Conference abstract                                              |
| Richette [109]                            | 2014 | Conference abstract                                              |
| Gutierrez [110]                           | 2014 | Conference abstract                                              |
| Furst [111]                               | 2013 | Not providing specific recommendations for hyperuricemia or gout |
| Hershfield [112]                          | 2013 | Not providing specific recommendations for hyperuricemia or gout |
| Andres [113]                              | 2012 | Conference abstract                                              |
| Stevenson [114]                           | 2011 | Technology appraisal                                             |
| Diaz-Borjon [115]                         | 2009 | Review                                                           |
| Furst [116]                               | 2010 | Not providing specific recommendations for hyperuricemia or gout |
| Taylor [117]                              | 2009 | Primary study                                                    |
| Taylor [118]                              | 2008 | Primary study                                                    |
| Bussieres [119]                           | 2008 | Not providing specific recommendations for hyperuricemia or gout |
| Brooks [120]                              | 2007 | Review                                                           |

|                                                             |      |                                                                  |
|-------------------------------------------------------------|------|------------------------------------------------------------------|
| Bestermann [121]                                            | 2005 | Not providing specific recommendations for hyperuricemia or gout |
| Schumacher Jr [122]                                         | 2004 | Review                                                           |
| Bartlett [123]                                              | 2002 | Not providing specific recommendations for hyperuricemia or gout |
| Furst [124]                                                 | 2013 | Not providing specific recommendations for hyperuricemia or gout |
| Newberry [125]                                              | 2017 | Review                                                           |
| Shekelle [126]                                              | 2017 | Review                                                           |
| Sandberg [127]                                              | 2015 | Not providing specific recommendations for hyperuricemia or gout |
| Kallinich [128]                                             | 2007 | Not providing specific recommendations for hyperuricemia or gout |
| Preminger [129]                                             | 2007 | Not providing specific recommendations for hyperuricemia or gout |
| TA164 [130]                                                 | 2008 | Technology appraisal                                             |
| Phoon [131]                                                 | 2012 | Not providing specific recommendations for hyperuricemia or gout |
| Li [132]                                                    | 2011 | Review                                                           |
| Zhang [133]                                                 | 2013 | Review                                                           |
| Deng [134]                                                  | 2016 | Primary study                                                    |
| Chinese Rheumatology Association [135]                      | 2004 | Replaced by updated versions from the same organization          |
| Chinese College of Cardiovascular Physicians [136]          | 2010 | Replaced by updated versions from the same organization          |
| Chinese Rheumatology Association [137]                      | 2011 | Replaced by updated versions from the same organization          |
| National Department of Health, Pretoria, South Africa [138] | 2006 | Not providing specific recommendations for hyperuricemia or gout |
| European Medicines Agency [139]                             | 2012 | Not providing specific recommendations for hyperuricemia or gout |
| Agency for Healthcare Research and Quality [140]            | 2017 | Review                                                           |
| Agency for Healthcare Research and Quality [141]            | 2017 | Review                                                           |
| National Institute for Health and Care Excellence [142]     | 2013 | Technology appraisal                                             |
| Agency for Healthcare Research and Quality [143]            | 2016 | Review                                                           |
| National Health System, United Kingdom [144]                | 2013 | Not providing specific recommendations for hyperuricemia or gout |
| Canadian Expert Drug Advisory Committee [145]               | 2011 | Not providing specific recommendations for hyperuricemia or gout |
| CME Academic Detailing Service [146]                        | 2013 | Presented as a 'handout', not a clinical practice guideline.     |
| Henderson [147]                                             | 2015 | Not released by a professional association                       |

Supplementary Table 5. Domain score for each included guidance document

| Document              | Domain 1, % | Domain 2, % | Domain 3, % | Domain 4, % | Domain 5, % | Domain 6, % |
|-----------------------|-------------|-------------|-------------|-------------|-------------|-------------|
| 3e_2013 [36]          | 95.8        | 34.7        | 65.6        | 77.8        | 42.7        | 72.9        |
| 3e_AU_NZ_2015 [43]    | 84.7        | 34.7        | 71.4        | 73.6        | 27.1        | 0.0         |
| 3e_PT_2014 [40]       | 95.8        | 22.2        | 42.7        | 70.8        | 27.1        | 0.0         |
| ACP_2017 [19, 20]     | 93.1        | 70.8        | 80.2        | 86.1        | 27.1        | 70.8        |
| ACR_2012 [14, 15]     | 86.1        | 81.9        | 73.4        | 84.7        | 1.0         | 45.8        |
| ACR_EULAR_2015 [42]   | 86.1        | 50.0        | 71.4        | 98.6        | 27.1        | 50.0        |
| BSR_2017 [21]         | 100.0       | 80.6        | 78.1        | 77.8        | 66.7        | 83.3        |
| CCCP_2012 [47]        | 76.4        | 9.7         | 8.3         | 62.5        | 0.0         | 0.0         |
| CRA_2016 [41]         | 84.7        | 48.6        | 50.5        | 70.8        | 2.1         | 33.3        |
| CRA_multi_2017 [22]   | 79.2        | 54.2        | 13.0        | 63.9        | 2.1         | 0.0         |
| CSE_2013 [37]         | 66.7        | 38.9        | 15.6        | 81.9        | 9.4         | 0.0         |
| EULAR_2006 [18]       | 86.1        | 23.6        | 65.1        | 90.3        | 24.0        | 16.7        |
| EULAR_2011 [17]       | 86.1        | 48.6        | 61.5        | 90.3        | 13.5        | 52.1        |
| EULAR_2016 [16]       | 83.3        | 79.2        | 67.7        | 94.4        | 26.0        | 29.2        |
| FMOH_2014 [44]        | 70.8        | 50.0        | 3.1         | 48.6        | 6.3         | 0.0         |
| JSGNAM_2011 [48]      | 81.9        | 38.9        | 37.0        | 87.5        | 0.0         | 0.0         |
| MOH_MSR_AMM_2008 [49] | 98.6        | 61.1        | 46.4        | 94.4        | 11.5        | 31.3        |
| PRA_2008 [50]         | 79.2        | 70.8        | 63.5        | 76.4        | 10.4        | 12.5        |
| SAMA_2003 [51]        | 75.0        | 37.5        | 28.1        | 80.6        | 5.2         | 50.0        |
| SER_2013 [46]         | 95.8        | 72.2        | 56.8        | 70.8        | 22.9        | 54.2        |
| SIR_2013 [45]         | 97.2        | 55.6        | 56.8        | 77.8        | 20.8        | 0.0         |
| T2T_2016 [39]         | 95.8        | 47.2        | 61.5        | 81.9        | 4.2         | 50.0        |
| TRA_2016 [38]         | 73.6        | 40.3        | 14.1        | 86.1        | 7.3         | 0.0         |
| UTAustin_2009 [52]    | 76.4        | 27.8        | 42.2        | 68.1        | 4.2         | 27.1        |
| Median                | 85.4        | 48.6        | 56.8        | 79.2        | 10.9        | 28.1        |
| Minimum               | 66.7        | 9.7         | 3.1         | 48.6        | 0.0         | 0.0         |
| Maximum               | 100.0       | 81.9        | 80.2        | 98.6        | 66.7        | 83.3        |



Supplementary Table 6. Mean scores across reviewers for the individual AGREE II domain items

| Document              | Domain 1 |     |     | Domain 2 |     |     | Domain 3 |     |     |     |     |     |     | Domain 4 |     |     | Domain 5 |     |     |     | Domain 6 |     |     |
|-----------------------|----------|-----|-----|----------|-----|-----|----------|-----|-----|-----|-----|-----|-----|----------|-----|-----|----------|-----|-----|-----|----------|-----|-----|
|                       | 1        | 2   | 3   | 4        | 5   | 6   | 7        | 8   | 9   | 10  | 11  | 12  | 13  | 14       | 15  | 16  | 17       | 18  | 19  | 20  | 21       | 22  | 23  |
| 3e_2013 [36]          | 6.8      | 6.5 | 7.0 | 7.0      | 1.3 | 1.0 | 6.3      | 3.8 | 6.3 | 5.8 | 5.8 | 6.8 | 4.0 | 1.0      | 6.0 | 7.0 | 4.0      | 6.8 | 1.0 | 5.3 | 1.3      | 7.0 | 3.8 |
| 3e_AU_NZ_2015 [43]    | 6.0      | 5.5 | 6.8 | 5.8      | 1.0 | 2.5 | 6.5      | 6.8 | 7.0 | 6.5 | 6.5 | 6.8 | 1.3 | 1.0      | 5.8 | 6.0 | 4.5      | 5.8 | 1.0 | 2.8 | 1.0      | 1.0 | 1.0 |
| 3e_PT_2014 [40]       | 6.5      | 7.0 | 6.8 | 4.8      | 1.3 | 1.0 | 2.8      | 2.3 | 5.5 | 3.5 | 5.5 | 6.8 | 1.3 | 1.0      | 5.5 | 6.3 | 4.0      | 4.5 | 1.3 | 2.8 | 2.0      | 1.0 | 1.0 |
| ACP_2017 [19, 20]     | 6.0      | 6.8 | 7.0 | 6.3      | 5.3 | 4.3 | 6.8      | 6.8 | 6.5 | 5.0 | 6.5 | 5.3 | 4.8 | 5.0      | 5.3 | 6.8 | 6.5      | 2.5 | 1.8 | 5.3 | 1.0      | 4.0 | 6.5 |
| ACR_2012 [14, 15]     | 6.5      | 5.5 | 6.5 | 7.0      | 5.3 | 5.5 | 7.0      | 7.0 | 6.8 | 6.0 | 5.8 | 6.0 | 1.5 | 3.3      | 5.8 | 7.0 | 5.5      | 1.0 | 1.0 | 1.0 | 1.3      | 3.3 | 4.3 |
| ACR_EULAR_2015 [42]   | 6.5      | 5.0 | 7.0 | 5.3      | 4.8 | 2.0 | 7.0      | 6.8 | 5.3 | 6.0 | 7.0 | 5.5 | 1.8 | 3.0      | 6.8 | 7.0 | 7.0      | 3.8 | 4.0 | 1.8 | 1.0      | 3.8 | 4.3 |
| BSR_2017 [21]         | 7.0      | 7.0 | 7.0 | 5.5      | 5.3 | 6.8 | 7.0      | 6.0 | 6.5 | 6.8 | 6.3 | 6.0 | 5.0 | 2.0      | 6.8 | 6.8 | 3.5      | 4.8 | 4.8 | 6.5 | 4.0      | 7.0 | 5.0 |
| CCCP_2012 [47]        | 6.8      | 3.0 | 7.0 | 2.0      | 1.0 | 1.8 | 1.0      | 1.0 | 1.0 | 1.0 | 3.8 | 2.0 | 1.3 | 1.0      | 4.5 | 5.8 | 4.0      | 1.0 | 1.0 | 1.0 | 1.0      | 1.0 | 1.0 |
| CRA_2016 [41]         | 6.3      | 5.0 | 7.0 | 5.5      | 1.0 | 5.3 | 5.0      | 3.3 | 6.3 | 3.5 | 6.0 | 5.5 | 1.8 | 1.0      | 5.3 | 6.5 | 4.0      | 1.3 | 1.0 | 1.3 | 1.0      | 1.0 | 5.0 |
| CRA_multi_2017 [22]   | 7.0      | 3.5 | 6.8 | 4.8      | 1.3 | 6.8 | 1.0      | 1.0 | 1.0 | 1.3 | 5.0 | 2.8 | 1.3 | 1.0      | 5.0 | 6.5 | 3.0      | 1.0 | 1.3 | 1.0 | 1.3      | 1.0 | 1.0 |
| CSE_2013 [37]         | 7.0      | 1.8 | 6.3 | 3.0      | 1.0 | 6.0 | 1.0      | 1.0 | 2.0 | 1.0 | 5.0 | 3.5 | 1.0 | 1.0      | 5.5 | 5.5 | 6.8      | 3.0 | 1.0 | 1.0 | 1.3      | 1.0 | 1.0 |
| EULAR_2006 [18]       | 6.0      | 5.5 | 7.0 | 5.0      | 1.0 | 1.3 | 7.0      | 7.0 | 5.8 | 4.3 | 6.0 | 5.8 | 1.3 | 2.3      | 6.0 | 6.8 | 6.5      | 1.0 | 2.5 | 5.3 | 1.0      | 3.0 | 1.0 |
| EULAR_2011 [17]       | 6.5      | 5.0 | 7.0 | 5.0      | 1.0 | 5.8 | 4.0      | 4.5 | 6.8 | 6.0 | 7.0 | 7.0 | 1.3 | 1.0      | 5.8 | 6.8 | 6.8      | 1.3 | 1.3 | 3.8 | 1.0      | 3.8 | 4.5 |
| EULAR_2016 [16]       | 6.3      | 4.8 | 7.0 | 5.8      | 5.0 | 6.5 | 5.0      | 2.0 | 6.3 | 6.8 | 6.0 | 6.5 | 6.0 | 2.0      | 6.5 | 6.8 | 6.8      | 3.0 | 1.3 | 5.0 | 1.0      | 1.5 | 4.0 |
| FMOH_2014 [44]        | 6.5      | 2.8 | 6.5 | 5.3      | 1.0 | 5.8 | 1.0      | 1.0 | 1.0 | 1.0 | 2.0 | 1.5 | 1.0 | 1.0      | 3.0 | 4.5 | 4.3      | 1.0 | 1.3 | 2.3 | 1.0      | 1.0 | 1.0 |
| JSGNAM_2011 [48]      | 5.3      | 5.5 | 7.0 | 1.8      | 4.3 | 4.0 | 1.3      | 1.0 | 6.8 | 3.3 | 6.3 | 3.8 | 2.5 | 1.0      | 6.8 | 6.3 | 5.8      | 1.0 | 1.0 | 1.0 | 1.0      | 1.0 | 1.0 |
| MOH_MSR_AMM_2008 [49] | 6.8      | 7.0 | 7.0 | 5.5      | 1.5 | 7.0 | 4.3      | 1.0 | 5.8 | 1.5 | 5.8 | 4.8 | 2.5 | 4.8      | 6.5 | 6.8 | 6.8      | 1.8 | 3.0 | 1.0 | 1.0      | 4.0 | 1.8 |
| PRA_2008 [50]         | 6.5      | 5.5 | 5.3 | 3.8      | 5.0 | 7.0 | 5.0      | 4.3 | 7.0 | 4.8 | 6.5 | 4.8 | 1.3 | 5.0      | 5.3 | 6.5 | 5.0      | 1.8 | 1.3 | 2.5 | 1.0      | 1.0 | 2.5 |
| SAMA_2003 [51]        | 6.5      | 3.0 | 7.0 | 4.0      | 1.3 | 4.5 | 1.0      | 1.0 | 1.0 | 4.0 | 6.5 | 2.8 | 2.5 | 2.8      | 5.0 | 6.5 | 6.0      | 1.0 | 2.0 | 1.3 | 1.0      | 7.0 | 1.0 |
| SER_2013 [46]         | 7.0      | 6.3 | 7.0 | 6.8      | 5.0 | 4.3 | 3.3      | 1.0 | 7.0 | 4.0 | 6.8 | 4.8 | 2.0 | 6.5      | 5.8 | 6.8 | 4.3      | 3.5 | 2.3 | 2.8 | 1.0      | 6.5 | 2.0 |
| SIR_2013 [45]         | 6.8      | 6.8 | 7.0 | 6.3      | 1.0 | 5.8 | 4.0      | 6.8 | 6.3 | 4.3 | 6.3 | 5.5 | 1.3 | 1.0      | 6.3 | 6.8 | 4.0      | 2.5 | 1.0 | 4.5 | 1.0      | 1.0 | 1.0 |
| T2T_2016 [39]         | 6.3      | 7.0 | 7.0 | 5.3      | 5.0 | 1.3 | 7.0      | 6.5 | 6.5 | 6.5 | 3.3 | 4.0 | 1.8 | 2.0      | 5.0 | 6.3 | 6.5      | 2.0 | 1.0 | 1.0 | 1.0      | 3.5 | 4.5 |
| TRA_2016 [38]         | 5.8      | 3.5 | 7.0 | 5.0      | 1.5 | 3.8 | 1.0      | 1.3 | 1.0 | 1.3 | 5.5 | 2.5 | 1.3 | 1.0      | 5.5 | 6.5 | 6.5      | 1.0 | 1.5 | 2.3 | 1.0      | 1.0 | 1.0 |
| UTAustin_2009 [52]    | 7.0      | 2.8 | 7.0 | 3.0      | 1.0 | 4.0 | 4.3      | 2.0 | 7.0 | 2.5 | 4.3 | 5.3 | 2.0 | 1.0      | 4.8 | 5.3 | 5.3      | 1.3 | 1.5 | 1.3 | 1.0      | 4.0 | 1.3 |

Supplementary Table 7. Scores for each individual AGREE II domain items by each reviewer

|                            | Ite<br>m1 | Ite<br>m2 | Ite<br>m3 | Ite<br>m4 | Ite<br>m5 | Ite<br>m6 | Ite<br>m7 | Ite<br>m8 | Ite<br>m9 | Item<br>10 | Item<br>11 | Item<br>12 | Item<br>13 | Item<br>14 | Item<br>15 | Item<br>16 | Item<br>17 | Item<br>18 | Item<br>19 | Item<br>20 | Item<br>21 | Item<br>22 | Item<br>23 |
|----------------------------|-----------|-----------|-----------|-----------|-----------|-----------|-----------|-----------|-----------|------------|------------|------------|------------|------------|------------|------------|------------|------------|------------|------------|------------|------------|------------|
| <b>3e_2013 [36]</b>        |           |           |           |           |           |           |           |           |           |            |            |            |            |            |            |            |            |            |            |            |            |            |            |
| Rev1                       | 7         | 7         | 7         | 7         | 1         | 1         | 6         | 4         | 4         | 5          | 7          | 7          | 2          | 1          | 6          | 7          | 4          | 7          | 1          | 5          | 1          | 7          | 4          |
| Rev2                       | 6         | 7         | 7         | 7         | 1         | 1         | 6         | 2         | 7         | 5          | 6          | 7          | 4          | 1          | 6          | 7          | 4          | 7          | 1          | 6          | 1          | 7          | 4          |
| Rev3                       | 7         | 5         | 7         | 7         | 2         | 1         | 7         | 5         | 7         | 6          | 5          | 6          | 5          | 1          | 5          | 7          | 4          | 7          | 1          | 5          | 2          | 7          | 3          |
| Rev4                       | 7         | 7         | 7         | 7         | 1         | 1         | 6         | 4         | 7         | 7          | 5          | 7          | 5          | 1          | 7          | 7          | 4          | 6          | 1          | 5          | 1          | 7          | 4          |
| <b>3e_AU_NZ_2015 [43]</b>  |           |           |           |           |           |           |           |           |           |            |            |            |            |            |            |            |            |            |            |            |            |            |            |
| Rev1                       | 5         | 5         | 7         | 7         | 1         | 2         | 7         | 7         | 7         | 7          | 7          | 7          | 2          | 1          | 5          | 6          | 4          | 6          | 1          | 2          | 1          | 1          | 1          |
| Rev2                       | 7         | 5         | 7         | 7         | 1         | 1         | 5         | 7         | 7         | 6          | 6          | 7          | 1          | 1          | 6          | 7          | 4          | 6          | 1          | 4          | 1          | 1          | 1          |
| Rev3                       | 5         | 7         | 7         | 4         | 1         | 4         | 7         | 7         | 7         | 7          | 7          | 7          | 1          | 1          | 6          | 5          | 6          | 6          | 1          | 2          | 1          | 1          | 1          |
| Rev4                       | 7         | 5         | 6         | 5         | 1         | 3         | 7         | 6         | 7         | 6          | 6          | 6          | 1          | 1          | 6          | 6          | 4          | 5          | 1          | 3          | 1          | 1          | 1          |
| <b>3e_PT_2014 [40]</b>     |           |           |           |           |           |           |           |           |           |            |            |            |            |            |            |            |            |            |            |            |            |            |            |
| Rev1                       | 6         | 7         | 7         | 5         | 1         | 1         | 3         | 1         | 7         | 3          | 6          | 7          | 2          | 1          | 5          | 6          | 4          | 4          | 1          | 5          | 1          | 1          | 1          |
| Rev2                       | 6         | 7         | 7         | 5         | 1         | 1         | 3         | 1         | 7         | 3          | 6          | 7          | 1          | 1          | 6          | 7          | 4          | 6          | 1          | 3          | 1          | 1          | 1          |
| Rev3                       | 7         | 7         | 6         | 5         | 2         | 1         | 2         | 1         | 6         | 5          | 4          | 6          | 1          | 1          | 5          | 6          | 4          | 4          | 2          | 2          | 5          | 1          | 1          |
| Rev4                       | 7         | 7         | 7         | 4         | 1         | 1         | 3         | 6         | 2         | 3          | 6          | 7          | 1          | 1          | 6          | 6          | 4          | 4          | 1          | 1          | 1          | 1          | 1          |
| <b>ACP_2017 [19, 20]</b>   |           |           |           |           |           |           |           |           |           |            |            |            |            |            |            |            |            |            |            |            |            |            |            |
| Rev1                       | 6         | 7         | 7         | 6         | 5         | 4         | 7         | 7         | 7         | 5          | 7          | 5          | 5          | 5          | 5          | 7          | 7          | 2          | 2          | 4          | 1          | 4          | 7          |
| Rev2                       | 6         | 7         | 7         | 6         | 5         | 4         | 7         | 7         | 7         | 5          | 7          | 5          | 5          | 4          | 6          | 7          | 7          | 4          | 3          | 7          | 1          | 4          | 7          |
| Rev3                       | 6         | 7         | 7         | 6         | 6         | 3         | 6         | 6         | 6         | 6          | 6          | 5          | 4          | 5          | 5          | 6          | 6          | 2          | 1          | 5          | 1          | 4          | 6          |
| Rev4                       | 6         | 6         | 7         | 7         | 5         | 6         | 7         | 7         | 6         | 4          | 6          | 6          | 5          | 6          | 5          | 7          | 6          | 2          | 1          | 5          | 1          | 4          | 6          |
| <b>ACR_2012 [14, 15]</b>   |           |           |           |           |           |           |           |           |           |            |            |            |            |            |            |            |            |            |            |            |            |            |            |
| Rev1                       | 6         | 5         | 7         | 7         | 5         | 7         | 7         | 7         | 6         | 6          | 6          | 5          | 2          | 3          | 5          | 7          | 4          | 1          | 1          | 1          | 1          | 3          | 4          |
| Rev2                       | 6         | 7         | 7         | 7         | 7         | 4         | 7         | 7         | 7         | 6          | 6          | 5          | 2          | 3          | 6          | 7          | 7          | 1          | 1          | 1          | 1          | 4          | 4          |
| Rev3                       | 7         | 5         | 7         | 7         | 5         | 7         | 7         | 7         | 7         | 6          | 5          | 7          | 1          | 3          | 5          | 7          | 7          | 1          | 1          | 1          | 2          | 3          | 4          |
| Rev4                       | 7         | 5         | 5         | 7         | 4         | 4         | 7         | 7         | 7         | 6          | 6          | 7          | 1          | 4          | 7          | 7          | 4          | 1          | 1          | 1          | 1          | 3          | 5          |
| <b>ACR_EULAR_2015 [42]</b> |           |           |           |           |           |           |           |           |           |            |            |            |            |            |            |            |            |            |            |            |            |            |            |
| Rev1                       | 6         | 5         | 7         | 6         | 6         | 2         | 7         | 7         | 7         | 7          | 7          | 5          | 2          | 3          | 7          | 7          | 7          | 3          | 3          | 1          | 1          | 4          | 4          |

|                            |   |   |   |   |   |   |   |   |   |   |   |   |   |   |   |   |   |   |   |   |   |   |   |
|----------------------------|---|---|---|---|---|---|---|---|---|---|---|---|---|---|---|---|---|---|---|---|---|---|---|
| <b>Rev2</b>                | 6 | 5 | 7 | 5 | 6 | 1 | 7 | 7 | 6 | 6 | 7 | 5 | 2 | 3 | 7 | 7 | 7 | 5 | 7 | 1 | 1 | 4 | 4 |
| <b>Rev3</b>                | 7 | 5 | 7 | 5 | 6 | 2 | 7 | 7 | 7 | 6 | 7 | 5 | 2 | 3 | 7 | 7 | 7 | 3 | 3 | 1 | 1 | 3 | 4 |
| <b>Rev4</b>                | 7 | 5 | 7 | 5 | 1 | 3 | 7 | 6 | 1 | 5 | 7 | 7 | 1 | 3 | 6 | 7 | 7 | 4 | 3 | 4 | 1 | 4 | 5 |
| <b>BSR_2017 [21]</b>       |   |   |   |   |   |   |   |   |   |   |   |   |   |   |   |   |   |   |   |   |   |   |   |
| <b>Rev1</b>                | 7 | 7 | 7 | 6 | 5 | 7 | 7 | 6 | 6 | 7 | 6 | 6 | 5 | 2 | 7 | 7 | 4 | 5 | 4 | 7 | 2 | 7 | 5 |
| <b>Rev2</b>                | 7 | 7 | 7 | 6 | 5 | 7 | 7 | 6 | 6 | 6 | 7 | 5 | 5 | 2 | 7 | 7 | 3 | 5 | 5 | 7 | 5 | 7 | 5 |
| <b>Rev3</b>                | 7 | 7 | 7 | 4 | 5 | 6 | 7 | 7 | 7 | 7 | 5 | 6 | 5 | 1 | 6 | 6 | 3 | 4 | 5 | 6 | 2 | 7 | 5 |
| <b>Rev4</b>                | 7 | 7 | 7 | 6 | 6 | 7 | 7 | 5 | 7 | 7 | 7 | 7 | 5 | 3 | 7 | 7 | 4 | 5 | 5 | 6 | 2 | 7 | 5 |
| <b>CCCP_2012 [47]</b>      |   |   |   |   |   |   |   |   |   |   |   |   |   |   |   |   |   |   |   |   |   |   |   |
| <b>Rev1</b>                | 6 | 3 | 7 | 2 | 1 | 2 | 1 | 1 | 1 | 1 | 3 | 1 | 2 | 1 | 3 | 6 | 4 | 1 | 1 | 1 | 1 | 1 | 1 |
| <b>Rev2</b>                | 7 | 3 | 7 | 2 | 1 | 1 | 1 | 1 | 1 | 1 | 4 | 3 | 1 | 1 | 4 | 5 | 4 | 1 | 1 | 1 | 1 | 1 | 1 |
| <b>Rev3</b>                | 7 | 3 | 7 | 2 | 1 | 1 | 1 | 1 | 1 | 1 | 4 | 2 | 1 | 1 | 6 | 6 | 4 | 1 | 1 | 1 | 1 | 1 | 1 |
| <b>Rev4</b>                | 7 | 3 | 7 | 2 | 1 | 3 | 1 | 1 | 1 | 1 | 4 | 2 | 1 | 1 | 5 | 6 | 4 | 1 | 1 | 1 | 1 | 1 | 1 |
| <b>CRA_2016 [41]</b>       |   |   |   |   |   |   |   |   |   |   |   |   |   |   |   |   |   |   |   |   |   |   |   |
| <b>Rev1</b>                | 5 | 5 | 7 | 6 | 1 | 4 | 5 | 3 | 7 | 3 | 7 | 5 | 2 | 1 | 5 | 7 | 4 | 1 | 1 | 1 | 1 | 1 | 4 |
| <b>Rev2</b>                | 7 | 5 | 7 | 6 | 1 | 5 | 4 | 3 | 6 | 4 | 6 | 5 | 3 | 1 | 6 | 7 | 4 | 1 | 1 | 1 | 1 | 1 | 4 |
| <b>Rev3</b>                | 7 | 5 | 7 | 5 | 1 | 6 | 5 | 3 | 6 | 1 | 5 | 6 | 1 | 1 | 5 | 6 | 4 | 1 | 1 | 2 | 1 | 1 | 6 |
| <b>Rev4</b>                | 6 | 5 | 7 | 5 | 1 | 6 | 6 | 4 | 6 | 6 | 6 | 6 | 1 | 1 | 5 | 6 | 4 | 2 | 1 | 1 | 1 | 1 | 6 |
| <b>CRA_multi_2017 [22]</b> |   |   |   |   |   |   |   |   |   |   |   |   |   |   |   |   |   |   |   |   |   |   |   |
| <b>Rev1</b>                | 7 | 3 | 7 | 5 | 1 | 7 | 1 | 1 | 1 | 1 | 5 | 3 | 2 | 1 | 5 | 7 | 2 | 1 | 1 | 1 | 1 | 1 | 1 |
| <b>Rev2</b>                | 7 | 3 | 7 | 5 | 1 | 7 | 1 | 1 | 1 | 2 | 5 | 2 | 1 | 1 | 5 | 7 | 3 | 1 | 1 | 1 | 1 | 1 | 1 |
| <b>Rev3</b>                | 7 | 3 | 7 | 4 | 2 | 6 | 1 | 1 | 1 | 1 | 5 | 5 | 1 | 1 | 5 | 5 | 3 | 1 | 1 | 1 | 2 | 1 | 1 |
| <b>Rev4</b>                | 7 | 5 | 6 | 5 | 1 | 7 | 1 | 1 | 1 | 1 | 5 | 1 | 1 | 1 | 5 | 7 | 4 | 1 | 2 | 1 | 1 | 1 | 1 |
| <b>CSE_2013 [37]</b>       |   |   |   |   |   |   |   |   |   |   |   |   |   |   |   |   |   |   |   |   |   |   |   |
| <b>Rev1</b>                | 7 | 1 | 6 | 3 | 1 | 6 | 1 | 1 | 2 | 1 | 5 | 5 | 1 | 1 | 5 | 6 | 7 | 3 | 1 | 1 | 1 | 1 | 1 |
| <b>Rev2</b>                | 7 | 3 | 6 | 4 | 1 | 6 | 1 | 1 | 3 | 1 | 5 | 3 | 1 | 1 | 6 | 6 | 7 | 3 | 1 | 1 | 1 | 1 | 1 |
| <b>Rev3</b>                | 7 | 1 | 7 | 2 | 1 | 7 | 1 | 1 | 2 | 1 | 5 | 3 | 1 | 1 | 6 | 6 | 6 | 3 | 1 | 1 | 2 | 1 | 1 |
| <b>Rev4</b>                | 7 | 2 | 6 | 3 | 1 | 5 | 1 | 1 | 1 | 1 | 5 | 3 | 1 | 1 | 5 | 4 | 7 | 3 | 1 | 1 | 1 | 1 | 1 |
| <b>EULAR_2006 [18]</b>     |   |   |   |   |   |   |   |   |   |   |   |   |   |   |   |   |   |   |   |   |   |   |   |
| <b>Rev1</b>                | 5 | 5 | 7 | 5 | 1 | 1 | 7 | 7 | 5 | 3 | 6 | 5 | 2 | 1 | 5 | 7 | 7 | 1 | 2 | 5 | 1 | 4 | 1 |

|                              |   |   |   |   |   |   |   |   |   |   |   |   |   |   |   |   |   |   |   |   |   |   |   |
|------------------------------|---|---|---|---|---|---|---|---|---|---|---|---|---|---|---|---|---|---|---|---|---|---|---|
| <b>Rev2</b>                  | 6 | 5 | 7 | 5 | 1 | 1 | 7 | 7 | 6 | 5 | 6 | 6 | 1 | 1 | 6 | 7 | 6 | 1 | 4 | 6 | 1 | 4 | 1 |
| <b>Rev3</b>                  | 7 | 7 | 7 | 5 | 1 | 1 | 7 | 7 | 6 | 5 | 7 | 6 | 1 | 1 | 7 | 7 | 7 | 1 | 1 | 5 | 1 | 1 | 1 |
| <b>Rev4</b>                  | 6 | 5 | 7 | 5 | 1 | 2 | 7 | 7 | 6 | 4 | 5 | 6 | 1 | 6 | 6 | 6 | 6 | 1 | 3 | 5 | 1 | 3 | 1 |
| <b>EULAR_2011 [17]</b>       |   |   |   |   |   |   |   |   |   |   |   |   |   |   |   |   |   |   |   |   |   |   |   |
| <b>Rev1</b>                  | 6 | 5 | 7 | 4 | 1 | 7 | 4 | 1 | 7 | 7 | 7 | 7 | 2 | 1 | 5 | 7 | 7 | 2 | 1 | 2 | 1 | 4 | 4 |
| <b>Rev2</b>                  | 6 | 5 | 7 | 5 | 1 | 3 | 4 | 7 | 7 | 4 | 7 | 7 | 1 | 1 | 6 | 7 | 7 | 1 | 1 | 5 | 1 | 4 | 4 |
| <b>Rev3</b>                  | 7 | 5 | 7 | 6 | 1 | 7 | 4 | 4 | 7 | 7 | 7 | 7 | 1 | 1 | 6 | 7 | 7 | 1 | 1 | 4 | 1 | 4 | 6 |
| <b>Rev4</b>                  | 7 | 5 | 7 | 5 | 1 | 6 | 4 | 6 | 6 | 6 | 7 | 7 | 1 | 1 | 6 | 6 | 6 | 1 | 2 | 4 | 1 | 3 | 4 |
| <b>EULAR_2016 [16]</b>       |   |   |   |   |   |   |   |   |   |   |   |   |   |   |   |   |   |   |   |   |   |   |   |
| <b>Rev1</b>                  | 7 | 7 | 7 | 6 | 5 | 7 | 5 | 2 | 7 | 7 | 7 | 7 | 6 | 1 | 7 | 7 | 7 | 2 | 2 | 5 | 1 | 1 | 4 |
| <b>Rev2</b>                  | 7 | 1 | 7 | 6 | 5 | 7 | 5 | 2 | 7 | 7 | 6 | 7 | 6 | 3 | 7 | 7 | 7 | 4 | 1 | 6 | 1 | 1 | 4 |
| <b>Rev3</b>                  | 5 | 5 | 7 | 5 | 5 | 5 | 5 | 1 | 6 | 6 | 5 | 6 | 6 | 2 | 5 | 6 | 6 | 4 | 1 | 4 | 1 | 1 | 4 |
| <b>Rev4</b>                  | 6 | 6 | 7 | 6 | 5 | 7 | 5 | 3 | 5 | 7 | 6 | 6 | 6 | 2 | 7 | 7 | 7 | 2 | 1 | 5 | 1 | 3 | 4 |
| <b>FMOH_2014 [44]</b>        |   |   |   |   |   |   |   |   |   |   |   |   |   |   |   |   |   |   |   |   |   |   |   |
| <b>Rev1</b>                  | 7 | 3 | 7 | 6 | 1 | 4 | 1 | 1 | 1 | 1 | 2 | 1 | 1 | 1 | 3 | 1 | 4 | 1 | 1 | 2 | 1 | 1 | 1 |
| <b>Rev2</b>                  | 7 | 3 | 7 | 5 | 1 | 7 | 1 | 1 | 1 | 1 | 2 | 1 | 1 | 1 | 4 | 4 | 4 | 1 | 2 | 3 | 1 | 1 | 1 |
| <b>Rev3</b>                  | 6 | 2 | 5 | 5 | 1 | 6 | 1 | 1 | 1 | 1 | 1 | 2 | 1 | 1 | 2 | 7 | 6 | 1 | 1 | 1 | 1 | 1 | 1 |
| <b>Rev4</b>                  | 6 | 3 | 7 | 5 | 1 | 6 | 1 | 1 | 1 | 1 | 3 | 2 | 1 | 1 | 3 | 6 | 3 | 1 | 1 | 3 | 1 | 1 | 1 |
| <b>JSGNAM_2011 [48]</b>      |   |   |   |   |   |   |   |   |   |   |   |   |   |   |   |   |   |   |   |   |   |   |   |
| <b>Rev1</b>                  | 5 | 5 | 7 | 2 | 4 | 4 | 1 | 1 | 6 | 3 | 6 | 3 | 2 | 1 | 7 | 7 | 4 | 1 | 1 | 1 | 1 | 1 | 1 |
| <b>Rev2</b>                  | 6 | 5 | 7 | 2 | 4 | 4 | 1 | 1 | 7 | 4 | 6 | 4 | 3 | 1 | 7 | 6 | 7 | 1 | 1 | 1 | 1 | 1 | 1 |
| <b>Rev3</b>                  | 5 | 7 | 7 | 1 | 4 | 4 | 1 | 1 | 7 | 1 | 7 | 4 | 2 | 1 | 7 | 6 | 7 | 1 | 1 | 1 | 1 | 1 | 1 |
| <b>Rev4</b>                  | 5 | 5 | 7 | 2 | 5 | 4 | 2 | 1 | 7 | 5 | 6 | 4 | 3 | 1 | 6 | 6 | 5 | 1 | 1 | 1 | 1 | 1 | 1 |
| <b>MOH_MSR_AMM_2008 [49]</b> |   |   |   |   |   |   |   |   |   |   |   |   |   |   |   |   |   |   |   |   |   |   |   |
| <b>Rev1</b>                  | 6 | 7 | 7 | 5 | 1 | 7 | 4 | 1 | 5 | 1 | 6 | 5 | 2 | 4 | 7 | 7 | 7 | 2 | 3 | 1 | 1 | 4 | 1 |
| <b>Rev2</b>                  | 7 | 7 | 7 | 5 | 3 | 7 | 4 | 1 | 6 | 2 | 6 | 4 | 3 | 5 | 6 | 7 | 7 | 3 | 5 | 1 | 1 | 4 | 2 |
| <b>Rev3</b>                  | 7 | 7 | 7 | 7 | 1 | 7 | 4 | 1 | 6 | 1 | 6 | 5 | 2 | 5 | 7 | 7 | 7 | 1 | 1 | 1 | 1 | 4 | 2 |
| <b>Rev4</b>                  | 7 | 7 | 7 | 5 | 1 | 7 | 5 | 1 | 6 | 2 | 5 | 5 | 3 | 5 | 6 | 6 | 6 | 1 | 3 | 1 | 1 | 4 | 2 |
| <b>PRA_2008 [50]</b>         |   |   |   |   |   |   |   |   |   |   |   |   |   |   |   |   |   |   |   |   |   |   |   |
| <b>Rev1</b>                  | 5 | 3 | 5 | 4 | 5 | 7 | 5 | 1 | 7 | 4 | 7 | 5 | 1 | 5 | 5 | 7 | 4 | 2 | 1 | 2 | 1 | 1 | 2 |

|                           |   |   |   |   |   |   |   |   |   |   |   |   |   |   |   |   |   |   |   |   |   |   |   |
|---------------------------|---|---|---|---|---|---|---|---|---|---|---|---|---|---|---|---|---|---|---|---|---|---|---|
| <b>Rev2</b>               | 7 | 7 | 4 | 3 | 5 | 7 | 5 | 6 | 7 | 4 | 6 | 4 | 2 | 5 | 5 | 6 | 7 | 3 | 2 | 3 | 1 | 1 | 4 |
| <b>Rev3</b>               | 7 | 7 | 7 | 4 | 5 | 7 | 5 | 5 | 7 | 6 | 7 | 5 | 1 | 5 | 6 | 7 | 5 | 1 | 1 | 2 | 1 | 1 | 2 |
| <b>Rev4</b>               | 7 | 5 | 5 | 4 | 5 | 7 | 5 | 5 | 7 | 5 | 6 | 5 | 1 | 5 | 5 | 6 | 4 | 1 | 1 | 3 | 1 | 1 | 2 |
| <b>SAMA_2003 [51]</b>     |   |   |   |   |   |   |   |   |   |   |   |   |   |   |   |   |   |   |   |   |   |   |   |
| <b>Rev1</b>               | 6 | 3 | 7 | 5 | 1 | 4 | 1 | 1 | 1 | 5 | 7 | 3 | 2 | 3 | 3 | 6 | 7 | 1 | 1 | 2 | 1 | 7 | 1 |
| <b>Rev2</b>               | 7 | 3 | 7 | 4 | 1 | 5 | 1 | 1 | 1 | 5 | 7 | 2 | 4 | 2 | 5 | 7 | 4 | 1 | 5 | 1 | 1 | 7 | 1 |
| <b>Rev3</b>               | 7 | 3 | 7 | 2 | 1 | 5 | 1 | 1 | 1 | 1 | 7 | 3 | 1 | 1 | 6 | 7 | 7 | 1 | 1 | 1 | 1 | 7 | 1 |
| <b>Rev4</b>               | 6 | 3 | 7 | 5 | 2 | 4 | 1 | 1 | 1 | 5 | 5 | 3 | 3 | 5 | 6 | 6 | 6 | 1 | 1 | 1 | 1 | 7 | 1 |
| <b>SER_2013 [46]</b>      |   |   |   |   |   |   |   |   |   |   |   |   |   |   |   |   |   |   |   |   |   |   |   |
| <b>Rev1</b>               | 7 | 6 | 7 | 7 | 5 | 4 | 3 | 1 | 7 | 3 | 7 | 5 | 2 | 5 | 5 | 6 | 4 | 2 | 2 | 2 | 1 | 7 | 2 |
| <b>Rev2</b>               | 7 | 6 | 7 | 6 | 5 | 3 | 3 | 1 | 7 | 5 | 6 | 4 | 2 | 7 | 6 | 7 | 4 | 4 | 5 | 3 | 1 | 5 | 2 |
| <b>Rev3</b>               | 7 | 7 | 7 | 7 | 5 | 5 | 3 | 1 | 7 | 3 | 7 | 6 | 2 | 7 | 7 | 7 | 4 | 4 | 1 | 4 | 1 | 7 | 2 |
| <b>Rev4</b>               | 7 | 6 | 7 | 7 | 5 | 5 | 4 | 1 | 7 | 5 | 7 | 4 | 2 | 7 | 5 | 7 | 5 | 4 | 1 | 2 | 1 | 7 | 2 |
| <b>SIR_2013 [45]</b>      |   |   |   |   |   |   |   |   |   |   |   |   |   |   |   |   |   |   |   |   |   |   |   |
| <b>Rev1</b>               | 7 | 7 | 7 | 6 | 1 | 7 | 4 | 7 | 5 | 3 | 7 | 5 | 2 | 1 | 7 | 7 | 4 | 2 | 1 | 4 | 1 | 1 | 1 |
| <b>Rev2</b>               | 7 | 7 | 7 | 6 | 1 | 4 | 4 | 7 | 7 | 5 | 6 | 5 | 1 | 1 | 6 | 7 | 4 | 4 | 1 | 6 | 1 | 1 | 1 |
| <b>Rev3</b>               | 7 | 7 | 7 | 6 | 1 | 6 | 4 | 7 | 7 | 6 | 7 | 6 | 1 | 1 | 6 | 7 | 4 | 1 | 1 | 4 | 1 | 1 | 1 |
| <b>Rev4</b>               | 6 | 6 | 7 | 7 | 1 | 6 | 4 | 6 | 6 | 3 | 5 | 6 | 1 | 1 | 6 | 6 | 4 | 3 | 1 | 4 | 1 | 1 | 1 |
| <b>T2T_2016 [39]</b>      |   |   |   |   |   |   |   |   |   |   |   |   |   |   |   |   |   |   |   |   |   |   |   |
| <b>Rev1</b>               | 6 | 7 | 7 | 5 | 5 | 1 | 7 | 7 | 7 | 7 | 3 | 3 | 2 | 1 | 4 | 6 | 7 | 3 | 1 | 1 | 1 | 4 | 2 |
| <b>Rev2</b>               | 7 | 7 | 7 | 6 | 5 | 1 | 7 | 7 | 7 | 7 | 4 | 5 | 2 | 5 | 6 | 7 | 7 | 1 | 1 | 1 | 1 | 4 | 4 |
| <b>Rev3</b>               | 5 | 7 | 7 | 5 | 5 | 2 | 7 | 6 | 6 | 6 | 2 | 3 | 2 | 1 | 5 | 6 | 6 | 3 | 1 | 1 | 1 | 3 | 6 |
| <b>Rev4</b>               | 7 | 7 | 7 | 5 | 5 | 1 | 7 | 6 | 6 | 6 | 4 | 5 | 1 | 1 | 5 | 6 | 6 | 1 | 1 | 1 | 1 | 3 | 6 |
| <b>TRA_2016 [38]</b>      |   |   |   |   |   |   |   |   |   |   |   |   |   |   |   |   |   |   |   |   |   |   |   |
| <b>Rev1</b>               | 5 | 3 | 7 | 5 | 1 | 4 | 1 | 1 | 1 | 1 | 6 | 2 | 2 | 1 | 6 | 7 | 7 | 1 | 1 | 2 | 1 | 1 | 1 |
| <b>Rev2</b>               | 6 | 3 | 7 | 5 | 1 | 7 | 1 | 1 | 1 | 2 | 6 | 2 | 1 | 1 | 6 | 7 | 7 | 1 | 3 | 3 | 1 | 1 | 1 |
| <b>Rev3</b>               | 6 | 3 | 7 | 5 | 3 | 1 | 1 | 2 | 1 | 1 | 5 | 4 | 1 | 1 | 5 | 6 | 6 | 1 | 1 | 2 | 1 | 1 | 1 |
| <b>Rev4</b>               | 6 | 5 | 7 | 5 | 1 | 3 | 1 | 1 | 1 | 1 | 5 | 2 | 1 | 1 | 5 | 6 | 6 | 1 | 1 | 2 | 1 | 1 | 1 |
| <b>UTAustin_2009 [52]</b> |   |   |   |   |   |   |   |   |   |   |   |   |   |   |   |   |   |   |   |   |   |   |   |
| <b>Rev1</b>               | 7 | 3 | 7 | 4 | 1 | 4 | 4 | 1 | 7 | 3 | 4 | 5 | 2 | 1 | 3 | 4 | 4 | 1 | 1 | 1 | 1 | 4 | 2 |

|             |   |   |   |   |   |   |   |   |   |   |   |   |   |   |   |   |   |   |   |   |   |   |   |
|-------------|---|---|---|---|---|---|---|---|---|---|---|---|---|---|---|---|---|---|---|---|---|---|---|
| <b>Rev2</b> | 7 | 3 | 7 | 2 | 1 | 4 | 4 | 1 | 7 | 2 | 4 | 5 | 2 | 1 | 5 | 6 | 7 | 2 | 3 | 1 | 1 | 4 | 1 |
| <b>Rev3</b> | 7 | 2 | 7 | 2 | 1 | 4 | 4 | 1 | 7 | 1 | 6 | 5 | 2 | 1 | 6 | 6 | 7 | 1 | 1 | 1 | 1 | 4 | 1 |
| <b>Rev4</b> | 7 | 3 | 7 | 4 | 1 | 4 | 5 | 5 | 7 | 4 | 3 | 6 | 2 | 1 | 5 | 5 | 3 | 1 | 1 | 2 | 1 | 4 | 1 |



**Supplementary Table 8. Summary of recommendations for the diagnosis of gout and hyperuricemia by included guidance document**

IE: insufficient evidence; MSU: monosodium urate; NA: not applicable; NG: not given; SUA: serum uric acid.

|                                                                          | SAMA_2003 [51] | EULAR_2006 [18] | MOH_MSR_AMM_2008 [49] | PRA_2008 [50] | EULAR_2011 [17] | JSGNAM_2011 [48] | CCCP_2012 [47] | 3e_2013 [36] | CSE_2013 [37] | SER_2013 [46] | SIR_2013 [45] | 3e_PT_2014 [40] | 3e_AU_NZ_2015 [43] | ACR_EULAR_2015 [42] | CRA_2016 [41] | TRA_2016 [38] | ACP_2017 [19, 20] | CRA_multi_2017 [22] |
|--------------------------------------------------------------------------|----------------|-----------------|-----------------------|---------------|-----------------|------------------|----------------|--------------|---------------|---------------|---------------|-----------------|--------------------|---------------------|---------------|---------------|-------------------|---------------------|
| <b>Diagnosis of gout</b>                                                 | +              | +               | +                     | NG            | +               | NG               | NG             | +            | NG            | +             | NG            | +               | +                  | +                   | +             | +             | +                 | +                   |
| _Clinical manifestations                                                 | +              | +               | +                     | NA            | +               | NA               | NA             | +            | NA            | +             | NA            | +               | +                  | +                   | +             | +             | +                 | +                   |
| _Laboratory results                                                      | +              | +               | -                     | NA            | +               | NA               | NA             | +            | NA            | +             | NA            | +               | +                  | +                   | +             | +             | +                 | +                   |
| _Imaging results                                                         | -              | +               | -                     | NA            | -               | NA               | NA             | +            | NA            | +             | NA            | +               | +                  | +                   | +             | +             | IE                | +                   |
| _MSU crystal as definitive diagnosis                                     | +              | +               | +                     | NA            | +               | NA               | NA             | +            | NA            | +             | NA            | +               | +                  | +                   | +             | +             | +                 | +                   |
| Monitor urate deposits clearance by imaging                              | -              | -               | -                     | -             | -               | -                | -              | -            | -             | IE            | -             | -               | -                  | +                   | -             | -             | -                 | +                   |
| Is the timing to assess urate deposits with imaging techniques provided? | -              | -               | -                     | -             | -               | -                | -              | -            | -             | -             | -             | -               | -                  | -                   | -             | -             | -                 | -                   |
| SUA for hyperuricemia, $\mu\text{mol/L}$ [mg/dL]                         | +              | NG              | +                     | +             | +               | +                | +              | NG           | +             | +             | +             | NG              | NG                 | NG                  | NG            | +             | NG                | +                   |
| _All gender                                                              | 420            | NG              | NG                    | NG            | [6.8]           | [7.0]            | 420 [7.0]      | NG           | NG            | NG            | 404 [6.8]     | NG              | NG                 | NG                  | NG            | [7.0]         | NG                | NG                  |
| _Female                                                                  | NG             | NG              | 360 [6.0]             | 357 [6.0]     | NG              | NG               | NG             | NG           | 360           | [6.0]         | NG            | NG              | NG                 | NG                  | NG            | NG            | NG                | 360                 |
| _Male                                                                    | NG             | NG              | 420 [7.0]             | 416 [7.0]     | NG              | NG               | NG             | NG           | 420           | [7.0]         | NG            | NG              | NG                 | NG                  | NG            | NG            | NG                | 420                 |
| <b>Diagnosis of asymptomatic hyperuricemia</b>                           | NG             | NG              | +                     | +             | NG              | +                | +              | +            | NG            | +             | NG            | NG              | NG                 | NG                  | NG            | +             | NG                | NG                  |
| _Gout flare                                                              | NA             | NA              | -                     | +             | NA              | +                | +              | +            | NA            | +             | NA            | NA              | NA                 | NA                  | NA            | +             | NA                | NA                  |
| _Tophi                                                                   | NA             | NA              | -                     | -             | NA              | +                | -              | +            | NA            | -             | NA            | NA              | NA                 | NA                  | NA            | -             | NA                | NA                  |
| _Additional medical conditions†                                          | NA             | NA              | +                     | +             | NA              | +                | +              | -            | NA            | -             | NA            | NA              | NA                 | NA                  | NA            | +             | NA                | NA                  |

\*Imaging results are considered for chronic gout, but not for early/acute gout.

†Additional medical conditions considered in the definition of asymptomatic hyperuricemia included complications of gout [47], renal disorder [48], signs or symptoms of



urate deposition [49], and uric acid nephrolithiasis [50]. One document provided a general statement of any clinical presentations [38]. One document explicitly stated that the inclusion of patients with pre-existing renal or cardiovascular disease was allowed [36].

**Supplementary Table 9. Summary of recommendations for the treatment of hyperuricemia by included guidance documents**

A: allopurinol; Aft: (to initiate ULT) after an acute attack; B: benzbromarone; CCR: creatinine clearance rate; Cr: serum creatinine; CKD: chronic kidney disease; D: (to initiate ULT) during an acute attack; eGFR: estimated glomerular filtration rate; F: febuxostat; IE: insufficient evidence; m: month(s); NA: not applicable; NG: not given; P: probenecid; RF: renal function; SUA: serum uric acid; U: uricosurics without specification; ULT: urate lowering therapy; w: week(s); y: year.

|                                                                       | SAMA_2003 [51] | MOH_MSR_AMM_2008 [49] | PRA_2008 [50] | UTAustin_2009 [52] | EULAR_2011 [17] | JSGNAM_2011 [48] | ACR_2012 [14, 15] | CCCP_2012 [47] | 3e_2013 [36] | CSE_2013 [37] | SER_2013 [46] | SIR_2013 [45] | 3e_PT_2014 [40] | FMOH_2014 [44] | 3e_AU_NZ_2015 [43] | CRA_2016 [41] | EULAR_2016 [16] | T2T_2016 [39] | TRA_2016 [38] | ACP_2017 [19, 20] | BSR_2017 [21] | CRA_multi_2017 [22] |  |
|-----------------------------------------------------------------------|----------------|-----------------------|---------------|--------------------|-----------------|------------------|-------------------|----------------|--------------|---------------|---------------|---------------|-----------------|----------------|--------------------|---------------|-----------------|---------------|---------------|-------------------|---------------|---------------------|--|
| Upper limit for target SUA, $\mu\text{mol/L}$ [mg/dL]                 |                |                       |               |                    |                 |                  |                   |                |              |               |               |               |                 |                |                    |               |                 |               |               |                   |               |                     |  |
| _General target*                                                      | 300            | 360 [6.0]             | [6.0]         | NG                 | [6.0]           | [6.0]            | [6.0]             | 357 [6.0]      | 360 [6.0]    | 360           | [6.0]         | 360 [6.0]     | 360 [6.0]       | NG             | 360                | 360 [6.0]     | 360 [6.0]       | 360 [6.0]     | 360 [6.0]     | NG                | 360           | 360 [6.0]           |  |
| _Target for serve cases†                                              | NG             | NG                    | NG            | NG                 | [4.0]           | NG               | [5.0]             | NG             | 300          | 300           | NG            | NG            | 300 [5.0]       | NG             | 300                | NG            | 300 [5.0]       | 300 [5.0]     | 300 [5.0]     | NG                | 300           | 300 [5.0]           |  |
| Lower limit for target SUA, $\mu\text{mol/L}$ [mg/dL]                 | NG             | NG                    | NG            | NG                 | NG              | NG               | NG                | NG             | NG           | NG            | NG            | NG            | NG              | NG             | NG                 | NG            | [3.0]           | NG            | NG            | NG                | NG            | 180                 |  |
| Drinking water                                                        | -              | +                     | +             | -                  | -               | +                | -                 | +              | -            | +             | +             | -             | -               | +              | -                  | +             | -               | -             | +             | -                 | +             | +                   |  |
| Urine alkalinisation                                                  | +              | +                     | -             | -                  | +               | -                | +                 | +              | -            | +             | +             | -             | +               | +              | -                  | +             | -               | -             | +             | -                 | +             | +                   |  |
| Indications for ULT                                                   | +              | +                     | +             | -                  | +               | +                | +                 | +              | -            | +             | +             | +             | -               | NG             | -                  | +             | +               | -             | +             | +                 | +             | +                   |  |
| _Recurrent attacks                                                    | +, >2          | +, >3/y               | +             | NA                 | +, >1/y         | +                | +, $\geq 2/y$     | -              | NA           | -             | -             | +             | NA              | NG             | -                  | +, >2/y       | +, $\geq 2/y$   | NA            | -             | +, $\geq 2/y$     | +, $\geq 2/y$ | +                   |  |
| _Tophi                                                                | +              | +                     | +             | NA                 | +               | +                | +                 | -              | NA           | -             | -             | +             | NA              | NG             | NA                 | +             | +               | NA            | +             | +                 | +             | +                   |  |
| _Urate nephrolithiasis                                                | -              | +                     | +             | NA                 | +               | -                | +                 | -              | NA           | +             | -             | -             | NA              | NG             | NA                 | -             | +               | NA            | +             | +                 | +             | +                   |  |
| _Arthropathy                                                          | -              | +                     | -             | NA                 | +               | -                | -                 | -              | NA           | -             | -             | +             | NA              | NG             | NA                 | +             | +               | NA            | +             | -                 | +             | +                   |  |
| _Comorbidities‡                                                       | -              | +                     | +             | NA                 | -               | -                | +                 | +              | NA           | +             | -             | -             | NA              | NG             | NA                 | -             | +               | NA            | -             | +                 | +             | +                   |  |
| _Others§                                                              | +              | +                     | +             | NA                 | -               | -                | -                 | +              | NA           | -             | +             | -             | NA              | NG             | NA                 | -             | +               | NA            | -             | -                 | +             | +                   |  |
| Initiate ULT during or after an acute attack (Aft(time after attack)) | Aft            | Aft                   | NG            | Aft (4-6 w)        | Aft             | Aft (2w)         | D                 | NA             | Aft          | D/Aft (2w)    | NG            | NG            | Aft             | NG             | NG                 | NG            | IE              | IE            | Aft           | NG                | Aft           | Aft                 |  |
| First line ULT drug(s)                                                | NG             | A                     | A             | NG                 | A, F            | A, B             | A, F              | NG             | A            | NG            | A, F          | A             | A               | NG             | A                  | NG            | A               | NG            | NG            | NG                | A             | NG                  |  |

|                                                                                          |        |         |    |    |     |             |         |              |          |         |         |         |            |    |           |       |      |     |       |        |          |            |  |
|------------------------------------------------------------------------------------------|--------|---------|----|----|-----|-------------|---------|--------------|----------|---------|---------|---------|------------|----|-----------|-------|------|-----|-------|--------|----------|------------|--|
|                                                                                          |        |         |    |    |     |             |         |              |          |         | B       |         |            |    |           |       |      |     |       |        |          |            |  |
| <b>Second line ULT drug(s)</b>                                                           | NG     | P       | NG | NG | P   | NG          | P       | NG           | U, F     | NG      | NG      | F, P, B | F, B, P, U | NG | P, B, F   | NG    | F, U | NG  | NG    | NG     | F        | NG         |  |
| <b>Allopurinol use</b>                                                                   |        |         |    |    |     |             |         |              |          |         |         |         |            |    |           |       |      |     |       |        |          |            |  |
| <b>_Maximum dose (mg/d)</b>                                                              | 300    | NG      | NG | NG | 800 | NG          | 800     | 600          | NG       | 600     | 800-900 | 800     | NG         | NG | 900       | NG    | NG   | NG  | 800   | NG     | 900      | 600        |  |
| <b>_RF to initiate dose adjustment (eGFR in ml/min/1.73m<sup>2</sup>, CCr in mL/min)</b> | CCr 60 | CCr 80  | NG | NG | NG  | NG          | CK D4   | NG           | NG       | CCr 60  | CCr 140 | CCr 20  | NG         | NG | NG        | NG    | NG   | NG  | NG    | NG     | eGFR 130 | 1.5mg/eGFR |  |
| <b>_Starting dose in normal RF (mg/d)</b>                                                | 50-100 | 100-150 | NG | NG | 100 | 50          | ≤100    | 50           | NG       | 100-150 | NG      | 100     | NG         | NG | NG        | 100   | 100  | NG  | 100   | 50-100 | 200      | 50-100     |  |
| <b>_HLA-B*5801 gene screening</b>                                                        | -      | -       | -  | -  | -   | -           | +       | -            | -        | +       | -       | -       | -          | NG | -         | -     | -    | -   | +     | -      | +        | +          |  |
| <b>Prophylaxis before ULT</b>                                                            | +      | NG      | NG | NG | +   | NG          | NG      | NG           | NG       | NG      | NG      | NG      | NG         | NG | NG        | NG    | NG   | NG  | NG    | NG     | NG       | NG         |  |
| <b>Prophylaxis with ULT</b>                                                              | +      | +       | NG | NG | +   | +           | +       | NG           | +        | +       | +       | +       | +          | NG | +         | +     | +    | +   | +     | +      | +        | +          |  |
| <b>Duration for prophylaxis</b>                                                          | 1-3 m  | 1-6 m** | NG | NG | NG  | NG          | 3-6 m†† | NG           | Un-clear | 6m      | >6m     | NG      | >6m        | NG | Vari-ed‡‡ | 3-6 m | NG   | >6m | 3-6 m | >8w    | <6m      | 3-6m       |  |
| <b>Pharmacological ULT for asymptomatic hyperuricemia?</b>                               | -      | +       | NG | -  | -   | +           | IE      | +            | IE       | IE      | NG      | NG      | -§§        | NG | IE        | NG    | NG   | IE  | -     | NG     | -        | NG         |  |
| <b>_Comorbidities</b>                                                                    | NA     | -       | NA | NA | NA  | +           | NA      | +            | NA       | NA      | NA      | NA      | -          | NG | NA        | NA    | NA   | NA  | NA    | NA     | NA       | NA         |  |
| <b>_SUA cut-offs, μmol/L [mg/dL]</b>                                                     | NA     | [10-13] | NA | NA | NA  | [8.0-9.0]¶¶ | NA      | [8.0-9.0]*** | NA       | NA      | NA      | NA      | [9.0]      | NG | NA        | NA    | NA   | NA  | NA    | NA     | NA       | NA         |  |

\* The general target was the target serum uric acid level for long term control recommended for all patients on pharmacological urate lowering therapy.

† The intensive target the intensive target was the target serum uric acid level for long term control recommended for patients with tophi [16, 17, 22, 36, 38, 40, 43], with recurrent attacks [16, 21, 22], or with chronic gouty arthritis [16, 22], or to prevent crystal formation [21], or to improve gout signs and symptoms [14, 15]. One document provided stricter target for any patient with gout [37], and one for patients with severe gout without clear definition [39].

‡ Comorbidities considered as the indication for ULT include renal impairment [14-16, 19-22, 37, 49, 50], cardiovascular risk or cardiovascular diseases [16, 22, 47], glucose intolerance or DM, lipid disorder, and obesity [22].

§ Others indications considered for pharmacological ULT include joint damage [21], diuretic therapy use [21], young age [16, 21, 22] with some documents defined as less than 40 years old [16, 22], high SUA level defined as >8mg/dL (480 μmol/L) [16] or >13mg/dl [50], impending cytotoxic chemotherapy or radiotherapy for lymphoma or

leukaemia [49], persistently raised uric acid levels and willingness to continue lifelong therapy [51]. Some documents evaluated SUA levels in patients after lifestyle modification and indicated pharmacological ULT in individuals with SUA above 6 mg/dL [46], or with SUA above 8mg/dl with CV risk or CVD and above 9mg/dl without CV risk or CVD [47].

|| The starting dose of allopurinol in patients with renal impairment should not exceed 1.5mg/eGFR.

¶ Prophylaxis should be continued until the serum urate is normal and the patient has not had any attacks for 1-3 months.

\*\* Prophylaxis should be continued until 6 months free of acute attacks or until 1 month with target serum urate level achieved.

†† Prophylaxis should be continued for 1) 6 months' duration, 2) 3 months after achieving the target serum urate level for the patient without tophi detected on physical examination, or 3) 6 months after achieving the target serum urate level, where there has been resolution of tophi previously detected on physical examination.

‡‡ The duration for prophylaxis varied and depends on the presence of tophi and comorbidities and on serum urate response. But prophylaxis should be continued until the target SUA is reached or until the tophi has resolved.

§§ The recommendations provided were conflict within the same document.

|||| Pharmacological urate lowering therapy is recommended in male patients with serum uric acid >13 mg/dL and in female patients with serum uric acid >10 mg/dL.

¶¶ Pharmacological urate lowering therapy is recommended in patients with serum uric acid >8 mg/dL if with complications or >9 mg/dL in all patients.

\*\*\* Pharmacological urate lowering therapy is recommended in patients with serum uric acid >8 mg/dL if with cardiovascular disease or cardiovascular risk factors or >9 mg/dL if without cardiovascular disease or cardiovascular risk factors.

**Supplementary Table 10. Summary of recommendations for the treatment of acute gout by included guidance documents**

NG: not given; NSAIDs: non-steroidal anti-inflammatory drugs.

|                              | What is the first line pharmacological treatment option? | Is colchicine recommended to be given as a fixed dose or as a loading dose + followed doses? | Is intra-articular steroids recommended? | What are the indications for intra-articular steroids? | Which line is intra-articular steroids recommended to be? | Is systemic steroids recommended? | What are the indications for systemic steroids?                                                                                                                | Which line of option is systemic steroids recommended to be? |
|------------------------------|----------------------------------------------------------|----------------------------------------------------------------------------------------------|------------------------------------------|--------------------------------------------------------|-----------------------------------------------------------|-----------------------------------|----------------------------------------------------------------------------------------------------------------------------------------------------------------|--------------------------------------------------------------|
| <b>SAMA_2003 [51]</b>        | NSAIDs                                                   | Loading dose + followed doses                                                                | Yes                                      | Contraindicated to NSAIDs and joint accessible         | NG                                                        | Yes                               | Contraindicated or not responding to NSAIDs or polyarthritis                                                                                                   | NG                                                           |
| <b>MOH_MSR_AMM_2008 [49]</b> | NSAIDs                                                   | NG                                                                                           | Yes                                      | NG                                                     | NG                                                        | Yes                               | Elderly people, renal insufficiency, hepatic dysfunction, cardiac failure, peptic ulcer disease, and hypersensitivity to NSAIDs                                | NG                                                           |
| <b>PRA_2008 [50]</b>         | NSAIDs                                                   | NG                                                                                           | NG                                       | NG                                                     | NG                                                        | Yes                               | Contraindicated to NSAIDs                                                                                                                                      | NG                                                           |
| <b>UTAustin_2009 [52]</b>    | NSAIDs                                                   | Loading dose + followed doses                                                                | Yes                                      | Only 1-2 joints is involved                            | Third                                                     | Yes                               | Contraindicated or not responding to NSAIDs and colchicine and polyarthritis                                                                                   | Third                                                        |
| <b>EULAR_2011 [17]</b>       | Colchicine, NSAIDs, glucocorticoids                      | Loading dose + followed doses                                                                | Yes                                      | NG                                                     | NG                                                        | Yes                               | Contraindications to NSAIDs and colchicine                                                                                                                     | First                                                        |
| <b>JSGNAM_2011 [48]</b>      | Colchicine, NSAIDs                                       | Fixed                                                                                        | NG                                       | NG                                                     | NG                                                        | Yes                               | Contraindicated or not responding to NSAIDs or polyarthritis                                                                                                   | Second                                                       |
| <b>ACR_2012 [14, 15]</b>     | NSAIDs, corticosteroids, colchicine                      | Loading dose + followed doses                                                                | Yes                                      | Involvement of 1 or 2 large joints                     | First                                                     | Yes                               | Oral steroids for involvement of 1 or 2 joints or when intra-articular joint injection is impractical. Intravenous steroids for the nothing by mouth patients. | First                                                        |
| <b>3e_2013 [36]</b>          | NSAIDs, colchicine, glucocorticoids                      | NG                                                                                           | Yes                                      | NG                                                     | First                                                     | Yes                               | NG                                                                                                                                                             | First                                                        |
| <b>CSE_2013 [37]</b>         | NSAIDs, colchicine,                                      | NG                                                                                           | NG                                       | NG                                                     | NG                                                        | NG                                | NG                                                                                                                                                             | NG                                                           |

|                            |                                           |                                           |     |                                                                                           |       |     |                                                                                        |        |
|----------------------------|-------------------------------------------|-------------------------------------------|-----|-------------------------------------------------------------------------------------------|-------|-----|----------------------------------------------------------------------------------------|--------|
|                            | corticosteroids                           |                                           |     |                                                                                           |       |     |                                                                                        |        |
| <b>SER_2013 [46]</b>       | NSAIDs                                    | NG                                        | Yes | Monoarthritis                                                                             | NG    | Yes | Contraindicated to NSAIDs                                                              | NG     |
| <b>SIR_2013 [45]</b>       | NSAIDs,<br>colchicine                     | NG                                        | Yes | NG                                                                                        | NG    | Yes | Intolerance or contraindications to NSAIDs<br>and colchicine                           | NG     |
| <b>3e_PT_2014 [40]</b>     | Colchicine,<br>NSAIDs                     | Fixed low dose                            | Yes | NG                                                                                        | NG    | Yes | NG                                                                                     | NG     |
| <b>FMOH_2014 [44]</b>      | NG                                        | NG                                        | NG  | NG                                                                                        | NG    | NG  | NG                                                                                     | NG     |
| <b>3e_AU_NZ_2015 [43]</b>  | NSAIDs,<br>colchicine,<br>glucocorticoids | NG                                        | Yes | NG                                                                                        | First | Yes | NG                                                                                     | First  |
| <b>CRA_2016 [41]</b>       | NSAIDs                                    | NG                                        | NG  | NG                                                                                        | NG    | Yes | Contraindications to NSAIDs and colchicine                                             | NG     |
| <b>EULAR_2016 [16]</b>     | Colchicine,<br>NSAIDs,<br>corticosteroid  | Loading dose +<br>followed doses          | Yes | NG                                                                                        | First | Yes | NG                                                                                     | First  |
| <b>T2T_2016 [39]</b>       | Anti-inflammatory<br>medications          | NG                                        | NG  | NG                                                                                        | NG    | NG  | NG                                                                                     | NG     |
| <b>TRA_2016 [38]</b>       | NSAIDs                                    | Fixed or Loading dose<br>+ followed doses | Yes | Involvement of 1-2 major<br>joints, contraindications<br>to both colchicine and<br>NSAIDs | NG    | Yes | Contraindications to NSAIDs and colchicine                                             | NG     |
| <b>ACP_2017 [19, 20]</b>   | Corticosteroids                           | Loading dose +<br>followed doses          | NG  | NG                                                                                        | NG    | Yes | If not contraindicated.                                                                | First  |
| <b>BSR_2017 [21]</b>       | NSAIDs,<br>colchicine                     | NG                                        | Yes | Patients with acute illness<br>and comorbidity                                            | First | Yes | Intolerance to NSAIDs and colchicine and<br>intra-articular injection is not feasible. | Second |
| <b>CRA_multi_2017 [22]</b> | NSAIDs,<br>colchicine                     | Loading dose +<br>followed doses          | Yes | Involvement of 1-2 major<br>joints and not responding<br>to systemic treatment            | NG    | Yes | Contraindicated to or not responding to<br>NSAIDs and colchicine                       | NG     |

**Supplementary Table 11. Summary of recommendations for the treatment of tophi by included guidance documents**

A: allopurinol; B: benzbromarone; F: febuxostat; NA: not applicable; NG: not given; P: pegloticase; R: rasburicase; ULT: urate lowering therapy; WH: wound healing.

|                                      | SAMA_2003 [51] | MOH_MSR_AMM_2008 [49] | PRA_2008 [50] | UTAustin_2009 [52] | EULAR_2011 [17] | JSGNAM_2011 [48] | ACR_2012 [14, 15] | 3e_2013 [36] | CSE_2013 [37] | SER_2013 [46] | SIR_2013 [45] | 3e_PT_2014 [40] | FMOH_2014 [44] | 3e_AU_NZ_2015 [43] | CRA_2016 [41] | EULAR_2016 [16] | T2T_2016 [39] | TRA_2016 [38] | ACP_2017 [19, 20] | BSR_2017 [21] | CRA_multi_2017 [22] |    |
|--------------------------------------|----------------|-----------------------|---------------|--------------------|-----------------|------------------|-------------------|--------------|---------------|---------------|---------------|-----------------|----------------|--------------------|---------------|-----------------|---------------|---------------|-------------------|---------------|---------------------|----|
| <b>Is surgery recommended?</b>       | +              | +                     | NG            | NG                 | NG              | +                | NG                | +            | NG            | NG            | NG            | +               | NG             | +                  | NG            | NG              | IE            | +             | NG                | -             | +                   |    |
| <b>Indications for surgery</b>       | NG             | +                     | NG            | NG                 | NG              | NG               | NG                | +            | NG            | NG            | NG            | NG              | NG             | +                  | NG            | NG              | NG            | +             | NG                | NG            | +                   |    |
| <b>_Nerve compression</b>            | NA             | -                     | NA            | NA                 | NA              | NA               | NA                | +            | NA            | NA            | NA            | NA              | NA             | +                  | NA            | NA              | NA            | +             | NA                | NA            | +                   |    |
| <b>_Infection</b>                    | NA             | -                     | NA            | NA                 | NA              | NA               | NA                | +            | NA            | NA            | NA            | NA              | NA             | +                  | NA            | NA              | NA            | +             | NA                | NA            | -                   |    |
| <b>_Mechanical impingement</b>       | NA             | -                     | NA            | NA                 | NA              | NA               | NA                | +            | NA            | NA            | NA            | NA              | NA             | +                  | NA            | NA              | NA            | -             | NA                | NA            | -                   |    |
| <b>_Loss of mobility</b>             | NA             | +                     | NA            | NA                 | NA              | NA               | NA                | -            | NA            | NA            | NA            | NA              | NA             | -                  | NA            | NA              | NA            | +             | NA                | NA            | -                   |    |
| <b>_Severe pain</b>                  | NA             | +                     | NA            | NA                 | NA              | NA               | NA                | -            | NA            | NA            | NA            | NA              | NA             | -                  | NA            | NA              | NA            | +             | NA                | NA            | -                   |    |
| <b>_Tophaceous ulcer</b>             | NA             | +                     | NA            | NA                 | NA              | NA               | NA                | -            | NA            | NA            | NA            | NA              | NA             | -                  | NA            | NA              | NA            | -             | NA                | NA            | +                   |    |
| <b>_Others*</b>                      | NA             | +                     | NA            | NA                 | NA              | NA               | NA                | -            | NA            | NA            | NA            | NA              | NA             | -                  | NA            | NA              | NA            | +             | NA                | NA            | +                   |    |
| <b>Risks of surgery</b>              | WH             | NG                    | NG            | NG                 | NG              | NG               | NG                | NG           | NG            | NG            | NG            | NG              | NG             | NG                 | NG            | NG              | NG            | NG            | NG                | NG            | NG                  | NG |
| <b>Is long-term ULT recommended?</b> | +              | +                     | +             | NG                 | +               | +                | +                 | +            | +             | +             | +             | +               | NG             | +                  | +             | +               | +             | +             | +                 | +             | +                   | +  |
| <b>Is any ULT drug recommended?</b>  | A              | -                     | -             | -                  | P               | -                | P                 | -            | B             | F             | NA            | -               | -              | P                  | -             | P               | -             | -             | -                 | P, R          | -                   |    |

\* Other indications for surgery include large tophi [22], persistent tophi [22], joint deformation [38], major joint destruction [49], pressure symptoms [49], and cosmetic [49].

**Supplementary Figure 1. Standardized domain scores by the year of publication**

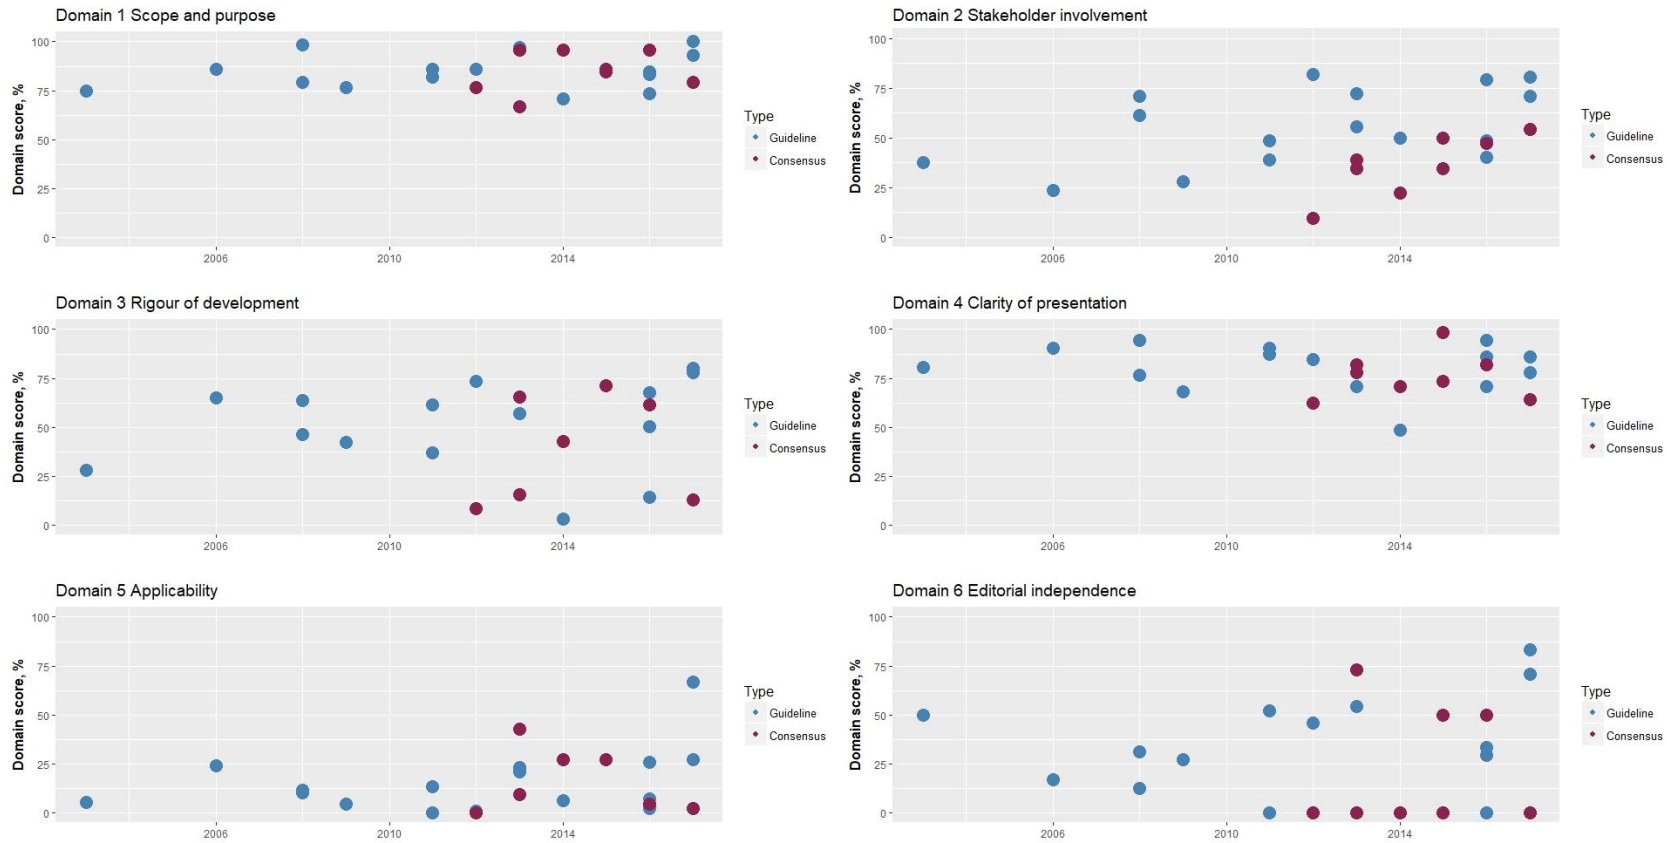



## Supplementary File 1. Instructions for Guideline Appraisal Using the AGREE II Instrument

### TRAINING MATERIALS

- Online tutorial: <http://www.agreetrust.org/resource-centre/agree-ii-training-tools/>
- User's Manual:  
[http://www.agreetrust.org/wp-content/uploads/2013/06/AGREE\\_II\\_Users\\_Manual\\_and\\_23-item\\_Instrument\\_ENGLISH.pdf](http://www.agreetrust.org/wp-content/uploads/2013/06/AGREE_II_Users_Manual_and_23-item_Instrument_ENGLISH.pdf)

### PROLOGUE

- The Appraisal of Guidelines for REsearch & Evaluation (AGREE) Instrument is an international, validated and rigorously developed tool to evaluate the quality of clinical practice guidelines and consensus statements.
- The AGREE II instrument was published in 2010 and consists of 23 key items organized within 6 domains followed by 2 global rating items ("Overall Assessment"). Each domain captures a unique dimension of guideline quality.
  - Scope and purpose
  - Stakeholder involvement
  - Rigour of development
  - Clarity of presentation
  - Applicability
  - Editorial independence.
- Reviewers score each item on a 7-point Likert Scale.
  - 1 - Strongly disagree
  - 7 - Strongly agree
  - For the majority of items, we use an 'add-up' strategy to score, that is, corresponding scores will be added to 1' if information on predefined aspects is provided. For only one item, we subtract scores from 7'.
- Domain scores will be calculated as: (obtained score-minimal possible score)/(maximal possible score-minimal possible score)

### DETAILED INSTRUCTIONS FOR SCORING

(adapted from AGREE II User's Manual [28])

#### Domain 1 Scope and Purpose

**Item 1 Objectives: The overall objective(s) of the guideline is (are) specifically described.**

##### Instructions:

Information on three aspects should be provided (add corresponding scores for each aspect, 5' in total):

a) Health intent, i.e., prevention, screening, diagnosis, treatment, etc. (2');

b) Expected benefit or outcome (2');

- *Clarification:* If gout epidemiology is provided as background information (i.e., the importance or significance of the diagnosis and management of gout/hyperuricemia is stated), 1' will be given. If clear statements, such as "to prevent (long term) complications of patients with diabetes mellitus" "to lower the risk of subsequent vascular events in patients with previous myocardial infarction", are provided, 2' will be given.

c) Target, e.g., patient population, society (1').

Performance: Is the item well written and is the content easy to find? (1')

Related *Report Criteria* from *User's Manual*: • health intent(s) (i.e., prevention, screening, diagnosis, treatment, etc.) • expected benefit or outcome • target(s) (e.g., patient population, society)

**Item 2 Questions: The health question(s) covered by the guideline is (are) specifically described.**

Instructions:

Information on five aspects should be provided (add corresponding scores for each aspect, 5' in total):

- a) Target population (2');
- b) Intervention or exposure (if appropriate, 1');
- c) Comparisons (if appropriate, 1');
- d) Outcome (1');
- e) Health care setting or context (1').

Performance: Is the item well written and is the content easy to find? (1')

Note:

- 1) If c) is not appropriate, no score will be subtracted.
- 2) It is not necessary to have this information provided in questions. Reviewers can try to paraphrase 2-3 key recommendations into questions to see the information above is provided and score based on paraphrased questions.

Related *Report Criteria* from *User's Manual*: • target population • intervention(s) or exposure(s) • comparisons (if appropriate) • outcome(s) • health care setting or context

**Item 3 Population: The population (patients, public, etc.) to whom the guideline is meant to apply is specifically described.**

Instructions:

A default full score (7') should be considered. Subtract 1-2 points where the population is not clearly described or where the descriptions in the guideline is contradictory (e.g., a guideline stating "to treat asymptomatic hyperuricaemia" in the introduction, while stating "to treat hyperuricaemia and gout" in the title and providing no specific definition of patients' condition in recommendations).

Related *Report Criteria* from *User's Manual*: • target population, gender and age • clinical condition (if relevant) • severity/stage of disease (if relevant) • comorbidities (if relevant) • excluded populations (if relevant)

**Domain 2 Stakeholder Involvement**

**Item 4 Group Membership: The guideline development group includes individuals from all relevant professional groups.**

Instructions:

Information on two aspects should be provided (add corresponding scores for each aspect, 5' in total):

- a) The guideline development group is stated (1');
- b) For each member of the guideline development group, the following information is included (1' each): name (1'), discipline/content expertise (e.g., neurosurgeon, methodologist, 1'), institution (e.g., St. Peter's hospital, 1'), a description of the member's role in the guideline development group (1')

- *Clarification:* Please subtract 1' if no methodologist (i.e., epidemiologist) is inferred from the discipline/content expertise.

Performance: Is the item well written and is the content easy to find? (1')

Note: Where the relation between the guideline development group and the authors is unclear, the authors of the guidance document will be considered as equivalent to the guideline development group.

Related *Report Criteria* from *User's Manual*: • For each member of the guideline development group, the following information is included: name, discipline/content expertise (e.g., neurosurgeon, methodologist), institution (e.g., St. Peter's hospital), geographical location (e.g., Seattle, WA), a description of the member's role in the guideline development group

**Item 5 Target Population Preferences and Views: The views and preferences of the target population (patients, public, etc.) have been sought.**

Instructions:

Information the following four aspects should be provided (add corresponding scores for each aspect, 6' in total):

- a) Statement of type of strategy used to capture patients'/public's' views and preferences (e.g., participation in the guideline development group, literature review of values and preferences, 2');
- b) Methods by which preferences and views were sought (e.g., evidence from literature, surveys, focus groups, 1');
- c) Outcomes/information gathered on patient/public information (2');
- d) Description of how the information gathered was used to inform the guideline development process and/or formation of the recommendations (1')

- *Clarification*: If a patient representative is included in the guideline development panel, scores on aspects a), b), and d) will be given as default.

Related *Report Criteria* from *User's Manual*: • statement of type of strategy used to capture patients'/public's' views and preferences (e.g., participation in the guideline development group, literature review of values and preferences) • methods by which preferences and views were sought (e.g., evidence from literature, surveys, focus groups) • outcomes/information gathered on patient/public information • description of how the information gathered was used to inform the guideline development process and/or formation of the recommendations

**Item 6 Target Users: The target users of the guideline are clearly defined.**

Instructions:

Information on two aspects should be provided (add corresponding scores for each aspect, 6' in total):

- a) Clear description of intended guideline audience (e.g. specialists, family physicians, patients, clinical or institutional leaders/administrators, 3');
- b) Description of how the guideline may be used by its target audience (e.g., to inform clinical decisions, to inform policy, to inform standards of care, 3')

Related *Report Criteria* from *User's Manual*: • clear description of intended guideline audience (e.g. specialists, family physicians, patients, clinical or institutional leaders/administrators) • description of how the guideline may be used by its target audience (e.g., to inform clinical decisions, to inform policy, to inform standards of care)

**Domain 3 Rigour of Development**

**Item 7 Search Methods: Systematic methods were used to search for evidence.**

Instructions:

Information on four aspects should be provided (add corresponding scores for each aspect, 6' in total):

- a) Named electronic database(s) or evidence source(s) where the search was performed (e.g., MEDLINE, EMBASE, PsychINFO, CINAHL, 2');
- b) Time periods searched (e.g., January 1, 2004 to March 31, 2008, 1');
- c) Search terms used (e.g., text words, indexing terms, subheadings, 1');
- d) Full search strategy included (e.g., possibly located in appendix, 2')

Related *Report Criteria* from *User's Manual*: • named electronic database(s) or evidence source(s) where the search was performed (e.g., MEDLINE, EMBASE, PsychINFO, CINAHL) • time periods searched (e.g., January 1, 2004 to March 31, 2008) • search terms used (e.g., text words, indexing terms, subheadings) • full search strategy included (e.g., possibly located in appendix)

### **Item 8 Evidence Selection Criteria: The criteria for selecting the evidence are clearly described.**

#### Instructions:

Information on both inclusion and exclusion criteria should be provided (add corresponding scores for each aspect, 6' in total):

- a) Description of the inclusion criteria:
  - a1) target population (patient, public, etc.) characteristics (2'),
  - a2) study design (2),
  - a4) outcomes (1'),
- b) Description of the exclusion criteria (if relevant; e.g., French only listed in the inclusion criteria statement could logically preclude non-French listed in the exclusion criteria statement, 1').

Note: if a3), a5), a6), b) is not relevant, no score will be subtracted.

Related *Report Criteria* from *User's Manual*: • description of the inclusion criteria, including: target population (patient, public, etc.) characteristics, study design, comparisons (if relevant), outcomes, language (if relevant), context (if relevant) • description of the exclusion criteria (if relevant; e.g., French only listed in the inclusion criteria statement could logically preclude non-French listed in the exclusion criteria statement)

### **Item 9 Strengths and Limitations of The Evidence: The strengths and limitations of the body of evidence are clearly described.**

#### Instructions:

For each evidence, information on two aspects should be provided. If only some of the evidences report the following information, please first calculate the score based on the most informative evidence (e.g., scored 5'), and then subtract 1' to get the final score (e.g., 5'-1'=4').

For each evidence, both a general statement of the method and detailed descriptions should be provided:

- a) A statement of the method used to evaluate the strengths and limitations of the evidence should be provided (3').
- b) The stated method should evaluate at least three of the following aspects (add 1' for each aspect, maximum 3'):
  - b1) Study design(s);
  - b2) Study methodology limitations (e.g., sampling, blinding, allocation concealment, analytical methods);
  - b3) Appropriateness/relevance of primary and secondary outcomes considered;
  - b4) Consistency of results across studies;
  - b5) Direction of results across studies;
  - b6) Magnitude of benefit versus magnitude of harm;

## b7) Applicability to practice context

Related *Report Criteria* from *User's Manual*: • descriptions of how the body of evidence was evaluated for bias and how it was interpreted by members of the guideline development group • aspects upon which to frame descriptions include: study design(s) included in body of evidence, study methodology limitations (sampling, blinding, allocation concealment, analytical methods), appropriateness/relevance of primary and secondary outcomes considered, consistency of results across studies, direction of results across studies, magnitude of benefit versus magnitude of harm, applicability to practice context

**Item 10 Formulation of Recommendations: The methods for formulating the recommendations are clearly described.**

Instructions:

Information on three aspects should be provide (add 2' for each aspect, 6' in total):

- a) Description of the recommendation development process (e.g., steps used in modified Delphi technique, voting procedures that were considered, 2');
- b) Outcomes of the recommendation development process (e.g., extent to which consensus was reached using modified Delphi technique, outcome of voting procedures, 2');
- c) Description of how the process influenced the recommendations (e.g., results of Delphi technique influence final recommendation, alignment with recommendations and the final vote, 2')

Related *Report Criteria* from *User's Manual*: • description of the recommendation development process (e.g., steps used in modified Delphi technique, voting procedures that were considered) • outcomes of the recommendation development process (e.g., extent to which consensus was reached using modified Delphi technique, outcome of voting procedures) • description of how the process influenced the recommendations (e.g., results of Delphi technique influence final recommendation, alignment with recommendations and the final vote)

**Item 11 Consideration of Benefits and Harms: The health benefits, side effects, and risks have been considered in formulating the recommendations.**

Instructions:

For each recommendation, information on four aspects should be provided. If only some of the recommendations report the following information, please first calculate the score based on the most informative recommendation (e.g., scored 5'), and subtract 1' to get the final score (e.g., 5'-1'=4').

For each recommendation, information on four aspects should be provided (add corresponding scores for each aspect, 6' in total):

- a) Supporting data and report of benefits (2'); b) Supporting data and report of harms/side effects/risks (2');  
- *Clarification:* Data on a) and b) can be provided as references.
- c) Reporting of the balance/trade-off between benefits and harms/side effects/risks (1');
- d) Recommendations reflect considerations of both benefits and harms/side effects/risks (1')

Related *Report Criteria* from *User's Manual*: • supporting data and report of benefits • supporting data and report of harms/side effects/risks • reporting of the balance/trade-off between benefits and harms/side effects/risks • recommendations reflect considerations of both benefits and harms/side effects/risks

**Item 12 Link Between Recommendations and Evidence: There is an explicit link between the recommendations and the supporting evidence.**

**Instructions:**

Information on three aspects should be provided (add 2' for each aspect, 6' in total):

- a) The guideline describes how the guideline development group linked and used the evidence to inform recommendations (2');
  - *Clarification*: Can be provided as narrative summaries and/or discussions of evidences.
- b) Each recommendation is linked to a key evidence description/paragraph and/or reference list (2');
  - *Note*: Please subtract 1' if only some recommendations meet criterium b).
- c) Recommendations linked to evidence summaries, evidence tables in the results section of the guideline (2')

Related *Report Criteria* from *User's Manual*: • the guideline describes how the guideline development group linked and used the evidence to inform recommendations • each recommendation is linked to a key evidence description/paragraph and/or reference list • recommendations linked to evidence summaries, evidence tables in the results section of the guideline

**Item 13 External Review: The guideline has been externally reviewed by experts prior to its publication.****Instructions:**

Information on five aspects should be provided (add corresponding scores for each aspect, 6' in total):

- a) Purpose and intent of the external review (e.g., to improve quality, gather feedback on draft recommendations, assess applicability and feasibility, disseminate evidence, 1');
  - b) Methods taken to undertake the external review (e.g., rating scale, open-ended questions, 1');
  - c) Description of the external reviewers (e.g., number, type of reviewers, affiliations, 1');
  - d) Outcomes/information gathered from the external review (e.g., summary of key findings, 1');
  - e) Description of how the information gathered was used to inform the guideline development process and/or formation of the recommendations (e.g., guideline panel considered results of review in forming final recommendations, 2')
- *Clarification*: Publication through a peer-reviewed journal can be considered as externally reviewed.  
Note: If dates of revision and acceptance is provided on the document, it is also considered externally reviewed.

Related *Report Criteria* from *User's Manual*: • purpose and intent of the external review (e.g., to improve quality, gather feedback on draft recommendations, assess applicability and feasibility, disseminate evidence) • methods taken to undertake the external review (e.g., rating scale, open-ended questions) • description of the external reviewers (e.g., number, type of reviewers, affiliations) • outcomes/information gathered from the external review (e.g., summary of key findings) • description of how the information gathered was used to inform the guideline development process and/or formation of the recommendations (e.g., guideline panel considered results of review in forming final recommendations)

**Item 14 Updating Procedure: A procedure for updating the guideline is provided.****Instructions:**

Information on three aspects should be provided (add 2' for each aspect, 6' in total):

- a) A statement that the guideline will be updated (2');
- b) Explicit time interval or explicit criteria to guide decisions about when an update will occur (2');
- c) Methodology for the updating procedure is reported (2')

Related *Report Criteria* from *User's Manual*: • a statement that the guideline will be updated • explicit

time interval or explicit criteria to guide decisions about when an update will occur • methodology for the updating procedure is reported

#### **Domain 4 Clarity of Presentation**

##### **Item 15 Specific and Unambiguous Recommendations: The recommendations are specific and unambiguous.**

###### Instructions:

For each recommendation, information on four aspects should be provided. If only some of the recommendations report the following information, please first calculate the score based on the most informative recommendation (e.g., scored 5'), and then subtract 1' to get the final score (e.g., 5'-1'=4').

For each recommendation, information on four aspects should be provided (add corresponding scores for each aspect, 6' in total):

- a) If a recommendation is uncertain, the uncertainty should be reflected in the recommendation and also be explicitly stated (2')
- b) Identification of the intent or purpose of the recommended action (e.g., to improve quality of life, to decrease side effects, 2');  
- *Clarification:* If the benefit for uric acid lowering in patients with CVD is not clearly stated, the score for this aspect should not be added.
- c) Identification of the relevant population (e.g., patients, public, 1');
- d) Caveats or qualifying statements, if relevant (e.g., patients or conditions for whom the recommendations would not apply, 1').

Note: if c) is not relevant, no score will be subtracted.

Related *Report Criteria* from *User's Manual*: • statement of the recommended action • identification of the intent or purpose of the recommended action (e.g., to improve quality of life, to decrease side effects) • identification of the relevant population (e.g., patients, public) • caveats or qualifying statements, if relevant (e.g., patients or conditions for whom the recommendations would not apply)

##### **Item 16 Management Options: The different options for management of the condition or health issue are clearly presented.**

###### Instructions:

Information on two aspects should be provided (add 3' for each aspect, 6' in total):

- a) Description of options (3');
  - b) Description of population or clinical situation most appropriate to each option (3')
- *Note:* Please subtract 1' if only some options are provided with the most appropriate population or clinical situation.

Related *Report Criteria* from *User's Manual*: • description of options • description of population or clinical situation most appropriate to each option

##### **Item 17 Identifiable Key Recommendations: Key recommendations are easily identifiable.**

###### Instructions:

Reporting style should follow two criteria (add 3' for each aspect, 6' in total):

- a) Description of recommendations in a summarized box, typed in bold, underlined, or presented as flow charts or algorithms (3');
- b) Specific recommendations are grouped together in one section (3')



- *Clarification*: If recommendations are summarised in the abstract, scores for aspect b) can also be given.

Related *Report Criteria* from *User's Manual*: • description of recommendations in a summarized box, typed in bold, underlined, or presented as flow charts or algorithms • specific recommendations are grouped together in one section

## Domain 5 Applicability

### Item 18 Facilitators and Barriers to Application: The guideline describes facilitators and barriers to its application.

#### Instructions:

Information on four aspects should be provided (add corresponding scores for each aspect, 6' in total):

a) Identification of the types of facilitators and barriers that were considered (2');

- *Clarification*: Statements of that certain drugs are not available in certain regions can be considered as identification of the facilitators and barriers.

b) Methods by which information regarding the facilitators and barriers to implementing recommendations were sought (e.g., feedback from key stakeholders, pilot testing of guidelines before widespread implementation, 2');

c) Information/description of the types of facilitators and barriers that emerged from the inquiry (e.g., practitioners have the skills to deliver the recommended care, sufficient equipment is not available to ensure all eligible members of the population receive mammography, 1');

d) Description of how the information influenced the guideline development process and/or formation of the recommendations (1')

Related *Report Criteria* from *User's Manual*: • identification of the types of facilitators and barriers that were considered • methods by which information regarding the facilitators and barriers to implementing recommendations were sought (e.g., feedback from key stakeholders, pilot testing of guidelines before widespread implementation) • information/description of the types of facilitators and barriers that emerged from the inquiry (e.g., practitioners have the skills to deliver the recommended care, sufficient equipment is not available to ensure all eligible members of the population receive mammography) • description of how the information influenced the guideline development process and/or formation of the recommendations

### Item 19 Implementation Advice or Tools: The guideline provides advice and/or tools on how the recommendations can be put into practice.

#### Instructions:

Information on three aspects should be provided (add corresponding scores for each aspect, 6' in total):

a) An implementation section in the guideline (2');

b) Tools and resources to facilitate application (add 1' for each tool/resource, maximum 2'): guideline summary documents, links to check lists/algorithms, links to how-to manuals, solutions linked to barrier analysis (see Item 18), tools to capitalize on guideline facilitators (see Item 18), outcome of pilot test and lessons learned;

c) Directions on how users can access tools and resources (2')

Related *Report Criteria* from *User's Manual*: • an implementation section in the guideline • tools and resources to facilitate application: guideline summary documents, links to check lists/algorithms, links to how-to manuals, solutions linked to barrier analysis (see Item 18), tools to capitalize on guideline facilitators (see Item 18), outcome of pilot test and lessons learned • directions on how users can access



tools and resources

**Item 20 Resource Implications: The potential resource implications of applying the recommendations have been considered.**

- *Clarification*: The aim of this item is to the cost information considered by the guideline.

Instructions:

Information on four aspects should be provided (add corresponding scores for each aspect, 6' in total):

- a) Identification of the types of cost information that were considered (e.g., economic evaluations, drug acquisition costs, 2');
- b) Methods by which the cost information was sought (e.g., a health economist was part of the guideline development panel, use of health technology assessments for specific drugs, etc., 2');
- c) Information/description of the cost information that emerged from the inquiry (e.g., specific drug acquisition costs per treatment course, 1');
- d) Description of how the information gathered was used to inform the guideline development process and/or formation of the recommendations (1')

*Related Report Criteria from User's Manual*: • identification of the types of cost information that were considered (e.g., economic evaluations, drug acquisition costs) • methods by which the cost information was sought (e.g., a health economist was part of the guideline development panel, use of health technology assessments for specific drugs, etc.) • information/description of the cost information that emerged from the inquiry (e.g., specific drug acquisition costs per treatment course) • description of how the information gathered was used to inform the guideline development process and/or formation of the recommendations

**Item 21 Monitoring or Auditing Criteria: The guideline presents monitoring and/or auditing criteria.**

- *Clarification*: The aim of this item is to evaluate the adherence to guidelines, but not to provide follow up parameters for diseases. *Monitoring* in this item refers to the action to monitor physicians' adherence to the guideline in daily practice by a group of investigators, but not to monitor the management of the disease in an individual patient. And the *auditing criteria* are the criteria to assess how well the guideline affects the practice in a region, but not how well the patients achieve the treatment target.

Instructions:

Information on four aspects should be provided (add corresponding scores for each aspect, 6' in total):

- a) Identification of criteria to assess guideline implementation or adherence to recommendations (2');
- b) Criteria for assessing impact of implementing the recommendations (2');
- c) Advice on the frequency and interval of measurement (1');
- d) Descriptions or operational definitions of how the criteria should be measured (1')

*Related Report Criteria from User's Manual*: • identification of criteria to assess guideline implementation or adherence to recommendations • criteria for assessing impact of implementing the recommendations • advice on the frequency and interval of measurement • descriptions or operational definitions of how the criteria should be measured

**Domain 6 Editorial Independence**

**Item 22 Funding Body: The views of the funding body have not influenced the content of the guideline.**

Instructions:

Information on two aspects should be provided (add 3' for each aspect, 6' in total):

- a) The name of the funding body or source of funding (or explicit statement of no funding, 3');
- b) A statement that the funding body did not influence the content of the guideline (3')

Related *Report Criteria* from *User's Manual*: • the name of the funding body or source of funding (or explicit statement of no funding) • a statement that the funding body did not influence the content of the guideline

**Item 23 Competing Interests: Competing interests of guideline development group members have been recorded and addressed.**

Instructions:

Information on four aspects should be provided (add corresponding scores for each aspect, 6' in total):

- a) Description of the types of competing interests considered (2');
- b) Methods by which potential competing interests were sought (1');
- c) Description of the competing interests (1');
- d) Description of how the competing interests influenced the guideline process and development of recommendations (2')

Related *Report Criteria* from *User's Manual*: • description of the types of competing interests considered • methods by which potential competing interests were sought • description of the competing interests • description of how the competing interests influenced the guideline process and development of recommendations

**Overall Guideline Assessment**

**Question 1 Overall quality: Rate the overall quality of this guideline.**

Instructions:

7' in total. Reviewer's impression on the overall quality of the guideline.

**Question 2 Strength of recommendation: I would recommend this guideline for use.**

Instructions:

Three options to choose from: a) Yes; b) Yes, with modifications; c) No

Reviewer's impression on whether the guideline is easy to be applied to clinical practice.

Related *Report Criteria* from *User's Manual*: The overall assessment requires the AGREE II user to make a judgment as to the quality of the guideline, taking into account the appraisal items considered in the assessment process.

## References

14. Khanna D, Fitzgerald JD, Khanna PP, Bae S, Singh MK, Neogi T, Pillinger MH, Merrill J, Lee S, Prakash S *et al*: **2012 American College of Rheumatology guidelines for management of gout. Part 1: systematic nonpharmacologic and pharmacologic therapeutic approaches to hyperuricemia.** *Arthritis care & research* 2012, **64**(10):1431-1446.
15. Khanna D, Khanna PP, Fitzgerald JD, Singh MK, Bae S, Neogi T, Pillinger MH, Merrill J, Lee S, Prakash S *et al*: **2012 American college of rheumatology guidelines for management of gout. part 2: Therapy and antiinflammatory prophylaxis of acute gouty arthritis.** *Arthritis Care and Research* 2012, **64**(10):1447-1461.
16. Richette P, Doherty M, Pascual E, Barskova V, Becce F, Castaneda-Sanabria J, Coyfish M, Guillo S, Jansen TL, Janssens H *et al*: **2016 updated EULAR evidence-based recommendations for the management of gout.** *Annals of the rheumatic diseases* 2016.
17. Hamburger M, Baraf HS, Adamson TC, 3rd, Basile J, Bass L, Cole B, Doghramji PP, Guadagnoli GA, Hamburger F, Harford R *et al*: **2011 Recommendations for the diagnosis and management of gout and hyperuricemia.** *Postgraduate medicine* 2011, **123**(6 Suppl 1):3-36.
18. Zhang W, Doherty M, Pascual E, Bardin T, Barskova V, Conaghan P, Gerster J, Jacobs J, Leeb B, Liote F *et al*: **EULAR evidence based recommendations for gout. Part I: Diagnosis. Report of a task force of the Standing Committee for International Clinical Studies Including Therapeutics (ESCSIT).** *Annals of the rheumatic diseases* 2006, **65**(10):1301-1311.
19. Qaseem A, McLean RM, Starkey M, Forcica MA: **Diagnosis of acute gout: a clinical practice guideline from the American College of Physicians.** *Annals of internal medicine* 2017, **166**(1):52-57.
20. Qaseem A, Harris RP, Forcica MA: **Management of acute and recurrent gout: a clinical practice guideline from the American College of Physicians.** *Annals of internal medicine* 2017, **166**(1):58-68.
21. Hui M, Carr A, Cameron S, Davenport G, Doherty M, Forrester H, Jenkins W, Jordan KM, Mallen CD, McDonald TM: **The British Society for Rheumatology guideline for the management of gout.** *Rheumatology* 2017, **56**(7):1056-1059.
22. Multi-disciplinary Expert Task Force on Hyperuricemia and Its Related Diseases. **Chinese multi-disciplinary consensus on the diagnosis and treatment of hyperuricemia and its related diseases.** *Chin J Intern Med.* 2017; **56**(3): 235-248 (Original document in Chinese).
28. Brouwers MC, Kho ME, Browman GP, Burgers JS, Cluzeau F, Feder G, Fervers B, Graham ID, Grimshaw J, Hanna SE: **AGREE II: advancing guideline development, reporting and evaluation in health care.** *Canadian Medical Association Journal* 2010, **182**(18):E839-E842.
36. Sivera F, Andres M, Carmona L, Kydd ASR, Moi J, Seth R, Sriranganathan M, Van Durme C, Van Echteld I, Vinik O *et al*: **Multinational evidence-based recommendations for the diagnosis and management of gout: Integrating systematic literature review and expert opinion of a broad panel of rheumatologists in the 3e initiative.** *Annals of the rheumatic diseases* 2014, **73**(2):328-335.
37. Chinese Society of Endocrinology. **Chinese consensus on the management of hyperuricemia and gout.** *Chin J Endocrinol Metab.* 2013; **29**(11): 913-920 (Original document in Chinese).
38. Association TR: **Taiwan guideline for the management of gout and hyperuricemia - updated 2016.** *Formosan Journal of Rheumatology* 2016, **30**:1-32.
39. Kiltz U, Smolen J, Bardin T, Cohen Solal A, Dalbeth N, Doherty M, Engel B, Flader C, Kay J, Matsuoka M *et al*: **Treat-to-target (T2T) recommendations for gout.** *Annals of the rheumatic diseases* 2016.
40. Araujo F, Cordeiro I, Teixeira F, Rovisco J, Ramiro S, Mourao AF, Costa JA, Pimentao JB, Malcata A, Santos MJ *et al*: **Portuguese recommendations for the diagnosis and management of gout.** *Acta reumatologica portuguesa* 2014, **39**(2):158-171.
41. Chinese Rheumatology Association. **2016 Chinese guideline on the diagnosis and management of**

- gout.** Chin J Intern Med. 2016; **55**(11): 892-899 (Original document in Chinese).
42. Neogi T, Jansen TLTA, Dalbeth N, Franssen J, Schumacher HR, Berendsen D, Brown M, Choi H, Edwards NL, Janssens HJEM *et al*: **2015 Gout classification criteria: An American College of Rheumatology/European League Against Rheumatism collaborative initiative.** *Annals of the rheumatic diseases* 2015, **74**(10):1789-1798.
43. Graf SW, Whittle SL, Wechalekar MD, Moi JHY, Barrett C, Hill CL, Littlejohn G, Lynch N, Major G, Taylor AL *et al*: **Australian and New Zealand recommendations for the diagnosis and management of gout: Integrating systematic literature review and expert opinion in the 3e Initiative.** *International journal of rheumatic diseases* 2015, **18**(3):341-351.
44. Federal Ministry of Health (Nigeria). **National nutritional guideline on non-communicable disease prevention, control and management.** Accessed at <http://www.health.gov.ng/doc/NutritionalGuideline.pdf> on 28 July 2017.
45. Manara M, Bortoluzzi A, Favero M, Prevete I, Scire CA, Bianchi G, Borghi C, Cimmino MA, D'Avola GM, Desideri G *et al*: **Italian Society of Rheumatology recommendations for the management of gout.** *Reumatismo* 2013, **65**(1):4-21.
46. Spanish Society of Rheumatology (SER). **Clinical practice guidelines for management of gout.** Accessed at [https://www.ser.es/wp-content/uploads/2015/09/GuipClinGot\\_1140226\\_EN.pdf](https://www.ser.es/wp-content/uploads/2015/09/GuipClinGot_1140226_EN.pdf) on 28 July 2017.
47. Hu D, Ding R: **The diagnosis and treatment advice of cardiovascular disease combined asymptomatic hyperuricemia (second edition).** *Chinese Journal of Cardiovascular Research* 2012, **10**(4):241-249.
48. Yamanaka H: **Japanese guideline for the management of hyperuricemia and gout: second edition.** *Nucleosides, nucleotides & nucleic acids* 2011, **30**(12):1018-1029.
49. **Ministry of Health Malaysia (MOH). Management of gout.** Accessed at <http://www.moh.gov.my/penerbitan/CPG2017/3893.pdf> on 28 July 2017.
50. Li-Yu J, Salido E, Manahan S, Lichauco J, Lorenzo J, Torralba K, Raso A, Roberto L, Santos EP, Maceda L: **Philippine clinical practice guidelines for the management of gout.** *International journal of rheumatic diseases* 2008, **11**:A362.
51. Meyers OL, Cassim B, Mody GM: **Hyperuricaemia and gout: clinical guideline 2003.** *South African medical journal = Suid-Afrikaanse tydskrif vir geneeskunde* 2003, **93**(12 Pt 2):961-971.
52. The University of Texas at Austin, School of Nursing, Family Nurse Practitioner Program. **Management of initial gout in adults.** Accessed at <http://www.alabmed.com/uploadfile/2014/0515/20140515070230703.pdf> on 25 July 2017.
68. Wuthrich H, Alromaih F, So A: **Guidelines for the treatment of gout: a Swiss perspective.** *Swiss medical weekly* 2016, **146**:w14341.
69. Ceriotti F, Fernandez-Calle P, Klee GG, Nordin G, Sandberg S, Streichert T, Vives-Corróns JL, Panteghini M: **Criteria for assigning laboratory measurands to models for analytical performance specifications defined in the 1st EFLM Strategic Conference.** *Clinical chemistry and laboratory medicine* 2016.
70. Liote F: **New therapeutic approach to hyperuricemia and gout in the light of recommendations.** *Joint, bone, spine : revue du rhumatisme* 2016, **83**(4):376-380.
71. de Lautour H, Taylor WJ, Adebajo A, Alten R, Burgos-Vargas R, Chapman P, Cimmino MA, da Rocha Castelar Pinheiro G, Day R, Harrold LR *et al*: **Development of Preliminary Remission Criteria for Gout Using Delphi and 1000Minds Consensus Exercises.** *Arthritis care & research* 2016, **68**(5):667-672.
72. De Lautour H, Dalbeth N, Taylor W: **Development of preliminary remission criteria for gout using Delphi and 1000 minds consensus exercises.** *Arthritis and Rheumatology* 2014, **66**:S68.

73. Dalbeth N, Winnard D, Gow PJ, Boswell DR, Te Karu L, Lindsay K, Arroll B, Stamp LK: **Urate testing in gout: why, when and how**. *The New Zealand medical journal* 2015, **128**(1420):65-68.
74. Terslev L, Gutierrez M, Schmidt WA, Keen HI, Filippucci E, Kane D, Thiele R, Kaeley G, Balint P, Mandl P *et al*: **Ultrasound as an Outcome Measure in Gout. A Validation Process by the OMERACT Ultrasound Working Group**. *The Journal of rheumatology* 2015, **42**(11):2177-2181.
75. Turk C, Petrik A, Sarica K, Seitz C, Skolarikos A, Straub M, Knoll T: **EAU Guidelines on Diagnosis and Conservative Management of Urolithiasis**. *European urology* 2016, **69**(3):468-474.
76. Stewart Coats AJ, Shewan LG: **Consensus Meeting on "Uric Acid and Cardiovascular Risk" held at University Magna Graecia, Catanzaro, Italy, May 2014. Publication of the Proceedings as a special issue in the International Journal of Cardiology**. *International journal of cardiology* 2016, **213**:1-3.
77. Sullivan PM, William A, Tichy EM: **Hyperuricemia and gout in solid-organ transplant: update in pharmacological management**. *Progress in transplantation (Aliso Viejo, Calif)* 2015, **25**(3):263-270.
78. Gutierrez M, Schmidt WA, Thiele RG, Keen HI, Kaeley GS, Naredo E, Iagnocco A, Bruyn GA, Balint PV, Filippucci E *et al*: **International Consensus for ultrasound lesions in gout: results of Delphi process and web-reliability exercise**. *Rheumatology (Oxford, England)* 2015, **54**(10):1797-1805.
79. Grainger R, Dalbeth N, Keen H, Durcan L, Lawrence Edwards N, Perez-Ruiz F, Diaz-Torne C, Singh JA, Khanna D, Simon LS *et al*: **Imaging as an Outcome Measure in Gout Studies: Report from the OMERACT Gout Working Group**. *The Journal of rheumatology* 2015, **42**(12):2460-2464.
80. Robinson PC, Dalbeth N: **Advances in pharmacotherapy for the treatment of gout**. *Expert opinion on pharmacotherapy* 2015, **16**(4):533-546.
81. Chaudhary K, Malhotra K, Sowers J, Aroor A: **Uric Acid - key ingredient in the recipe for cardiorenal metabolic syndrome**. *Cardiorenal medicine* 2013, **3**(3):208-220.
82. Bakris GL, Doghramji PP, Keenan RT, Silber SH: **CaseBook challenges: Managing gout, hyperuricemia and comorbidities -- dialogue with the experts**. *The American journal of medicine* 2014, **127**(1):S1.
83. Terkeltaub R: **Gout: multinational gout guidelines: how do we move beyond 'deja vu'?** *Nature reviews Rheumatology* 2013, **9**(10):567-569.
84. Lyseng-Williamson KA: **Canakinumab: a guide to its use in acute gouty arthritis flares**. *BioDrugs : clinical immunotherapeutics, biopharmaceuticals and gene therapy* 2013, **27**(4):401-406.
85. Deodhar A: **Update in rheumatology: evidence published in 2012**. *Annals of internal medicine* 2013, **158**(12):903-906.
86. Simao AN, Lozovoy MA, Dichi I: **The uric acid metabolism pathway as a therapeutic target in hyperuricemia related to metabolic syndrome**. *Expert opinion on therapeutic targets* 2012, **16**(12):1175-1187.
87. Stamp LK, Jordan S: **The challenges of gout management in the elderly**. *Drugs & aging* 2011, **28**(8):591-603.
88. Jansen TL, Richette P, Perez-Ruiz F, Tausche AK, Guerne PA, Punzi L, Leeb B, Barskova V, Uhlig T, Pimentao J *et al*: **International position paper on febuxostat**. *Clinical rheumatology* 2010, **29**(8):835-840.
89. Grainger R, Taylor WJ, Dalbeth N, Perez-Ruiz F, Singh JA, Waltrip RW, Schlesinger N, Evans R, Edwards NL, Sivera F *et al*: **Progress in measurement instruments for acute and chronic gout studies**. *The Journal of rheumatology* 2009, **36**(10):2346-2355.
90. Grainger R, Taylor WJ: **Establishing outcome domains for evaluating treatment of acute and chronic gout**. *Current opinion in rheumatology* 2008, **20**(2):173-178.
91. Dalbeth N, Stamp L: **Allopurinol dosing in renal impairment: walking the tightrope between adequate urate lowering and adverse events**. *Seminars in dialysis* 2007, **20**(5):391-395.

92. Jordan KM, Cameron JS, Snaith M, Zhang W, Doherty M, Seckl J, Hingorani A, Jaques R, Nuki G: **British Society for Rheumatology and British Health Professionals in Rheumatology guideline for the management of gout.** *Rheumatology (Oxford, England)* 2007, **46**(8):1372-1374.
93. Becker G: **The CARI guidelines. Kidney stones: uric acid stones.** *Nephrology (Carlton, Vic)* 2007, **12 Suppl 1**:S21-25.
94. Caramia G, Di Gregorio L, Tarantino ML, Galuffo A, Iacolino R, Caramia M: **Uric acid, phosphate and oxalate stones: treatment and prophylaxis.** *Urologia internationalis* 2004, **72 Suppl 1**:24-28.
95. Terkeltaub RA: **Clinical practice. Gout.** *The New England journal of medicine* 2003, **349**(17):1647-1655.
96. Cleland LG, Hill CL, James MJ: **Diet and arthritis.** *Bailliere's clinical rheumatology* 1995, **9**(4):771-785.
97. Hande KR, Noone RM, Stone WJ: **Severe allopurinol toxicity. Description and guidelines for prevention in patients with renal insufficiency.** *The American journal of medicine* 1984, **76**(1):47-56.
98. **Committee on the Review of Medicines. Recommendations on phenylbutazone, oxyphenbutazone, feprazone, allopurinol, colchicine, probenecid, and sulphinpyrazone.** *British medical journal* 1978, **1**(6125):1466-1467.
99. Mourgues C, Soubrier M, Pereira B, Vorilhon P, Mathieu S: **2012 American guidelines for the management of gout as seen by family doctors in France.** *Annals of the rheumatic diseases* 2016, **75**:1187.
100. Bakris GL, Doghramji PP, Keenan RT, Silber SH: **CaseBook Challenges: Managing Gout, Hyperuricemia and Comorbidities-Dialogue with the Experts.** *American Journal of Medicine* 1970, **127**(1):S1.
101. Pai S, Raslan A, Schlesinger N: **Gout: Update on Current Therapeutics.** *Current Treatment Options in Rheumatology* 2015, **1**(2):131-142.
102. Vargas-Santos AB, Taylor WJ, Neogi T: **Gout Classification Criteria: Update and Implications.** *Current rheumatology reports* 2016, **18** (7) (no pagination)(46).
103. Filiopoulos V, Hadjiyannakos D, Vlassopoulos D: **Febuxostat renoprotection in CKD patients with asymptomatic hyperuricemia.** *American Journal of Kidney Diseases* 2016, **67**(6):989-990.
104. Chinchilla SP, Urionaguena I, Perez-Ruiz F: **Febuxostat for the chronic management of hyperuricemia in patients with gout.** *Expert Review of Clinical Pharmacology* 2016, **9**(5):665-673.
105. Rimler E, Lom J, Higdon J, Cosco D, Jones D: **A primary care perspective on gout.** *Open Urology and Nephrology Journal* 2016, **9**(Suppl 1: M5):27-34.
106. Saito Y, Stamp LK, Caudle KE, Hershfield MS, McDonagh EM, Callaghan JT, Tassaneeyakul W, Mushiroda T, Kamatani N, Goldspiel BR *et al*: **CPIC: Clinical Pharmacogenetics Implementation Consortium of the Pharmacogenomics Research Network.** *Clinical pharmacology and therapeutics* 2016, **99**(1):36-37.
107. Mody GM: **Update on hyperuricaemia and gout with evidence based management guidelines.** *South African Family Practice* 2015, **57**(4):267-272.
108. Richette P, Pascual E, Doherty M, Barskova V, Becce F, Coyfish M, Janssens H, Jansen T, Liote F, Mallen C *et al*: **Updated EULAR evidence-based recommendations for the diagnosis of gout.** *Annals of the Rheumatic Diseases Conference: Annual European Congress of Rheumatology of the European League Against Rheumatism, EULAR* 2014, **73**(no pagination).
109. Richette P, Doherty M, Pascual E, Barskova V, Becce F, Coyfish M, Janssens H, Jansen T, Liote F, Mallen C *et al*: **Updated EULAR evidence-based recommendations for the management of gout.** *Annals of the Rheumatic Diseases Conference: Annual European Congress of Rheumatology of the European League Against Rheumatism, EULAR* 2014, **73**(no pagination).
110. Gutierrez M, Smith W, Thiele R, Keen H, Kaeley G, Naredo E, Iagnocco A, Bruyn G, Balint P,



- Filippucci E *et al*: **Defining elementary ultrasound lesions in gout. Preliminary results of delphi consensus and web-exercise reliability.** *Annals of the Rheumatic Diseases Conference: Annual European Congress of Rheumatology of the European League Against Rheumatism, EULAR* 2014, **73**(no pagination).
111. Furst DE, Keystone EC, So AK, Braun J, Breedveld FC, Burmester GR, De Benedetti F, Dorner T, Emery P, Fleischmann R *et al*: **Updated consensus statement on biological agents for the treatment of rheumatic diseases, 2012.** *Annals of the rheumatic diseases* 2013, **72**(SUPPL. 2):ii2-ii34.
112. Hershfield MS, Callaghan JT, Tassaneeyakul W, Mushiroda T, Thorn CF, Klein TE, Lee MTM: **Clinical pharmacogenetics implementation consortium guidelines for human leukocyte antigen-b genotype and allopurinol dosing.** *Clinical pharmacology and therapeutics* 2013, **93**(2):153-158.
113. Andres M, Sivera F, Kydd A, Moi J, Seth R, Sriranganathan MK, Van Durme C, Van Ectheld IAAM, Vinik O, Wechalekar MD *et al*: **Multinational evidence-based recommendations for diagnosis and management of gout: Integrating systematic literature research and expert opinion of a broad panel of rheumatologists in the 3E initiative.** *Arthritis and rheumatism* 2012, **64**:S810.
114. Stevenson M, Pandor A: **Febuxostat for the management of hyperuricaemia in patients with gout: A nice single technology appraisal.** *PharmacoEconomics* 2011, **29**(2):133-140.
115. Diaz-Borjon A: **Guidelines for the use of conventional and newer disease-modifying antirheumatic drugs in elderly patients with rheumatoid arthritis.** *Drugs and Aging* 2009, **26**(4):273-293.
116. Furst DE, Keystone EC, Fleischmann R, Mease P, Breedveld FC, Smolen JS, Kalden JR, Braun J, Bresnihan B, Burmester GR *et al*: **Updated consensus statement on biological agents for the treatment of rheumatic diseases, 2009.** *Annals of the rheumatic diseases* 2010, **69**(SUPPL. 1):i2-i29.
117. Taylor WJ, Shewchuk R, Saag KG, Schumacher Jr HR, Singh JA, Grainger R, Edwards NL, Bardin T, Waltrip RW, Simon LS *et al*: **Toward a Valid Definition of Gout Flare: Results of Consensus Exercises Using Delphi Methodology and Cognitive Mapping.** *Arthritis Care and Research* 2009, **61**(4):535-543.
118. Taylor WJ, Schumacher Jr HR, Baraf HSB, Chapman P, Stamp L, Doherty M, McQueen F, Dalbeth N, Schlesinger N, Furst DE *et al*: **A modified Delphi exercise to determine the extent of consensus with OMERACT outcome domains for studies of acute and chronic gout.** *Annals of the rheumatic diseases* 2008, **67**(6):888-891.
119. Bussieres AE, Peterson C, Taylor JAM: **Diagnostic Imaging Guideline for Musculoskeletal Complaints in Adults-An Evidence-Based Approach-Part 2: Upper Extremity Disorders.** *Journal of Manipulative and Physiological Therapeutics* 2008, **31**(1):2-32.
120. Brooks P, Boers M, Simon LS, Strand V, Tugwell P: **Outcome measures in rheumatoid arthritis: The OMERACT process.** *Expert Review of Clinical Immunology* 2007, **3**(3):271-275.
121. Bestermann W, Houston MC, Basile J, Egan B, Ferrario CM, Lackland D, Hawkins RG, Reed J, Rogers P, Wise D *et al*: **Addressing the global cardiovascular risk of hypertension, dyslipidemia, diabetes mellitus, and the metabolic syndrome in the Southeastern United States, part II: Treatment recommendations for management of the global cardiovascular risk of hypertension, dyslipidemia, diabetes mellitus, and the metabolic syndrome.** *American Journal of the Medical Sciences* 2005, **329**(6):292-305.
122. Schumacher Jr HR: **Management strategies for osteoarthritis, ankylosing spondylitis, and gouty arthritis.** *Journal of Clinical Rheumatology* 2004, **10**(3 SUPPL.):S18-S25.
123. Bartlett JG: **Guidelines section.** *Infectious Diseases in Clinical Practice* 2002, **11**(8):467-471.
124. Furst DE, Keystone EC, So AK, Braun J, Breedveld FC, Burmester GR, De Benedetti F, Dörner T, Emery P, Fleischmann R: **Updated consensus statement on biological agents for the treatment of rheumatic diseases, 2012.** *Annals of the rheumatic diseases* 2013, **72**(suppl 2):ii2-ii34.
125. Newberry SJ, FitzGerald JD, Motala A, Booth M, Maglione MA, Han D, Tariq A, O'hanlon CE,

- Shanman R, Dudley W: **Diagnosis of gout: a systematic review in support of an American College of Physicians clinical practice guideline.** *Annals of internal medicine* 2017, **166**(1):27-36.
126. Shekelle PG, Newberry SJ, FitzGerald JD, Motala A, O'hanlon CE, Tariq A, Okunogbe A, Han D, Shanman R: **Management of gout: a systematic review in support of an American College of Physicians clinical practice guideline.** *Annals of internal medicine* 2017, **166**(1):37-51.
127. Sandberg S, Fraser CG, Horvath AR, Jansen R, Jones G, Oosterhuis W, Petersen PH, Schimmel H, Sikaris K, Panteghini M: **Defining analytical performance specifications: consensus statement from the 1st Strategic Conference of the European Federation of Clinical Chemistry and Laboratory Medicine.** *Clinical Chemistry and Laboratory Medicine (CCLM)* 2015, **53**(6):833-835.
128. Kallinich T, Haffner D, Niehues T, Huss K, Lainka E, Neudorf U, Schaefer C, Stojanov S, Timmann C, Keitzer R: **Colchicine use in children and adolescents with familial Mediterranean fever: literature review and consensus statement.** *Pediatrics* 2007, **119**(2):e474-e483.
129. Preminger GM, Tiselius H-G, Assimos DG, Alken P, Buck C, Gallucci M, Knoll T, Lingeman JE, Nakada SY, Pearle MS: **2007 guideline for the management of ureteral calculi.** *The Journal of urology* 2007, **178**(6):2418-2434.
130. National Institute for Health and Care Excellence (NICE). **Febuxostat for the management of hyperuricaemia in people with gout.** Assessed at nice.org.uk/guidance/ta164 on 25 July 2017.
131. Phoon, R and Johnson, D. **Medical therapies to reduce chronic kidney disease progression and cardiovascular risk: uric acid-lowering agents.** Accessed at [http://www.cari.org.au/CKD/CKD%20early/Medical\\_Th\\_Uric\\_Acid-lowering.pdf](http://www.cari.org.au/CKD/CKD%20early/Medical_Th_Uric_Acid-lowering.pdf) on 23 July 2017.
132. Li Q, Yu P: **The diagnosis and treatment of gout.** *Int J Endocrinol Metab* 2011, **31**(5):289-291.
133. zhang X, Zhang Z: **Advice for the diagnosis and treatment for gout.** *Chin J Rheumatol* 2013, **17**(8):631.
134. Deng X, Zhang Z: **OMERACT Ultrasound Gout Task Force group released the international consensus for ultrasound lesions in gout.** *Chin J Rheumatol* 2016, **20**(3):216.
135. Chinese Rheumatology Association (CRA). **Guideline for the diagnosis and tretment for primary gout (draft).** *Chin J Rheumatol.* 2004;8(3): 178-181 (Original document in Chinese).
136. Chinese College of Cardiovascular Physicians (CCCP). **The diagnosis and treatment advice of cardiovascular disease combined asymptomatic hyperuricemia (second edition).** Accessed at <http://www.alabmed.com/uploadfile/2014/0121/20140121022919976.pdf> on 20 July 2017 (Original document in Chinese).
137. Chinese Rheumatology Association (CRA). **Guideline for the diagnosis and tretment for primary gout (draft).** *Chin J Rheumatol.* 2011;15(6): 410-413 (Original document in Chinese).
138. World Health Organization (WHO). **Standard treatment guidelines and essential drugs list for South Africa.** Accessed at <http://apps.who.int/medicinedocs/documents/s18259en/s18259en.pdf> on 23 July 2017.
139. European Medicines Agency (EMA). **Concept paper on the need of the guideline on clinical investigation of medicinal products for the treatment of gout.** Accessed at [http://www.ema.europa.eu/docs/en\\_GB/document\\_library/Scientific\\_guideline/2012/06/WC500128670.pdf](http://www.ema.europa.eu/docs/en_GB/document_library/Scientific_guideline/2012/06/WC500128670.pdf) on 23 July 2017.
140. Agency for Healthcare Research and Quality (AHRQ). **Diagnosis and Management of Gout: Current State of the Evidence.** Accessed at [https://effectivehealthcare.ahrq.gov/sites/default/files/pdf/gout\\_clinician.pdf](https://effectivehealthcare.ahrq.gov/sites/default/files/pdf/gout_clinician.pdf) on 25 July 2017.
141. Agency for Healthcare Research and Quality (AHRQ). **Diagnosis of Gout.** Accessed at [https://effectivehealthcare.ahrq.gov/sites/default/files/pdf/gout\\_research-2016.pdf](https://effectivehealthcare.ahrq.gov/sites/default/files/pdf/gout_research-2016.pdf) on 25 July 2017.
142. National Institute for Health and Care Excellence (NICE). **Pegloticase for treating severe debilitating chronic tophaceous gout.** Assessed at nice.org.uk/guidance/ta291 on 25 July 2017.



143. Agency for Healthcare Research and Quality (AHRQ). **Diagnosis of gout**. Assessed at [www.effectivehealthcare.ahrq.gov/reports/fnal.cfm](http://www.effectivehealthcare.ahrq.gov/reports/fnal.cfm) on 25 July 2017.
144. Buckinghamshire Formulary, National Health Service (NHS). **781FM.1 Febuxostat**. Accessed at [http://www.bucksformulary.nhs.uk/docs/Guideline\\_781FM.pdf](http://www.bucksformulary.nhs.uk/docs/Guideline_781FM.pdf) on 25 July 2017.
145. Canadian Expert Drug Advisory Committee (CEDAC). **Febuxostat**. Accessed at [https://www.cadth.ca/media/cdr/complete/cdr\\_complete\\_Uloric\\_April-29-11.pdf](https://www.cadth.ca/media/cdr/complete/cdr_complete_Uloric_April-29-11.pdf) on 25 July 2017.
146. Dalhousie CME Academic Detailing Service. **Gout: Update 2013**. Accessed at [https://cdn.dal.ca/content/dam/dalhousie/pdf/faculty/medicine/departments/core-units/cpd/academic-detailing/Gout\\_workbook.pdf](https://cdn.dal.ca/content/dam/dalhousie/pdf/faculty/medicine/departments/core-units/cpd/academic-detailing/Gout_workbook.pdf) on 23 July 2017.
147. Lancashire Medicines Management Group, National Health Service (NHS). **Gout Management Summary Guidelines (Version 1.1)**. Accessed at [http://www.lancsmmg.nhs.uk/download/guidelines/Gout%20Prescribing%20Guidance%20\(Versio%201.1\).pdf](http://www.lancsmmg.nhs.uk/download/guidelines/Gout%20Prescribing%20Guidance%20(Versio%201.1).pdf) on 25 July 2017.
